# Supplementary material
Source: MDPI journal article supplement (https://www.mdpi.com/2073-4344/9/10/846)

# checkCIF/PLATON report

You have not supplied any structure factors. As a result the full set of tests cannot be run.

THIS REPORT IS FOR GUIDANCE ONLY. IF USED AS PART OF A REVIEW PROCEDURE FOR PUBLICATION, IT SHOULD NOT REPLACE THE EXPERTISE OF AN EXPERIENCED CRYSTALLOGRAPHIC REFEREE.

No syntax errors found.      CIF dictionary      Interpreting this report

## Datablock: shelx

---

Bond precision:    C-C = 0.0126 Å                      Wavelength=0.71075

Cell:                      a=13.240(3)              b=11.975(2)              c=32.330(6)  
                                alpha=90              beta=90              gamma=90  
Temperature:              143 K

|                | Calculated                               | Reported                                  |
|----------------|------------------------------------------|-------------------------------------------|
| Volume         | 5125.9(17)                               | 5125.9(18)                                |
| Space group    | P n m a                                  | P n m a                                   |
| Hall group     | -P 2ac 2n                                | -P 2ac 2n                                 |
| Moiety formula | 2(C23 H29 Cl Ir N2 O2), C<br>H4 O, 2(Cl) | 2(Cl H29 C23 Ir N2 O2), 2<br>(Cl), C H4 O |
| Sum formula    | C47 H62 Cl4 Ir2 N4 O5                    | C47 H62 Cl4 Ir2 N4 O5                     |
| Mr             | 1289.25                                  | 1289.20                                   |
| Dx,g cm-3      | 1.671                                    | 1.671                                     |
| Z              | 4                                        | 4                                         |
| Mu (mm-1)      | 5.442                                    | 5.442                                     |
| F000           | 2536.0                                   | 2536.0                                    |
| F000'          | 2528.00                                  |                                           |
| h,k,lmax       | 17,15,42                                 | 17,15,41                                  |
| Nref           | 6174                                     | 6136                                      |
| Tmin,Tmax      | 0.350,0.897                              | 0.706,1.000                               |
| Tmin'          | 0.324                                    |                                           |

Correction method= # Reported T Limits: Tmin=0.706 Tmax=1.000  
AbsCorr = MULTI-SCAN

Data completeness= 0.994                      Theta(max)= 27.500

R(reflections)= 0.0584( 5744)              wR2(reflections)= 0.1387( 6136)

S = 1.170                      Npar= 312

---

The following ALERTS were generated. Each ALERT has the format

**test-name\_ALERT\_alert-type\_alert-level.**

Click on the hyperlinks for more details of the test.

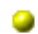

### Alert level C

|                   |                                                  |              |
|-------------------|--------------------------------------------------|--------------|
| PLAT220_ALERT_2_C | Non-Solvent Resd 1 C Ueq(max)/Ueq(min) Range     | 3.4 Ratio    |
| PLAT342_ALERT_3_C | Low Bond Precision on C-C Bonds .....            | 0.01262 Ang. |
| PLAT601_ALERT_2_C | Structure Contains Solvent Accessible VOIDS of . | 95 Ang**3    |

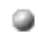

### Alert level G

FORMU01\_ALERT\_1\_G There is a discrepancy between the atom counts in the  
\_chemical\_formula\_sum and \_chemical\_formula\_moiety. This is  
usually due to the moiety formula being in the wrong format.  
Atom count from \_chemical\_formula\_sum: C47 H62 Cl4 Ir2 N4 O5  
Atom count from \_chemical\_formula\_moiety:C49 H62 Cl2 Ir2 N4 O5

|                   |                                                 |              |
|-------------------|-------------------------------------------------|--------------|
| PLAT007_ALERT_5_G | Number of Unrefined Donor-H Atoms .....         | 3 Report     |
| PLAT042_ALERT_1_G | Calc. and Reported MoietyFormula Strings Differ | Please Check |
| PLAT083_ALERT_2_G | SHELXL Second Parameter in WGHT Unusually Large | 54.43 Why ?  |
| PLAT300_ALERT_4_G | Atom Site Occupancy of H00V Constrained at      | 0.8124 Check |
| PLAT300_ALERT_4_G | Atom Site Occupancy of H Constrained at         | 0.0938 Check |
| PLAT300_ALERT_4_G | Atom Site Occupancy of H00W Constrained at      | 0.4062 Check |
| PLAT300_ALERT_4_G | Atom Site Occupancy of H00X Constrained at      | 0.4062 Check |
| PLAT300_ALERT_4_G | Atom Site Occupancy of H00Y Constrained at      | 0.1876 Check |
| PLAT300_ALERT_4_G | Atom Site Occupancy of Ha Constrained at        | 0.0938 Check |
| PLAT300_ALERT_4_G | Atom Site Occupancy of H9A Constrained at       | 0.5 Check    |
| PLAT300_ALERT_4_G | Atom Site Occupancy of H9B Constrained at       | 0.5 Check    |
| PLAT300_ALERT_4_G | Atom Site Occupancy of H9C Constrained at       | 0.5 Check    |
| PLAT300_ALERT_4_G | Atom Site Occupancy of H011 Constrained at      | 0.5 Check    |
| PLAT304_ALERT_4_G | Non-Integer Number of Atoms in ..... Resd 4     | 0.50 Check   |
| PLAT304_ALERT_4_G | Non-Integer Number of Atoms in ..... Resd 5     | 0.50 Check   |
| PLAT367_ALERT_2_G | Long? C(sp?)-C(sp?) Bond C00S - C00V .          | 1.53 Ang.    |
| PLAT367_ALERT_2_G | Long? C(sp?)-C(sp?) Bond C00R - C00W .          | 1.53 Ang.    |
| PLAT720_ALERT_4_G | Number of Unusual/Non-Standard Labels .....     | 70 Note      |
| PLAT789_ALERT_4_G | Atoms with Negative _atom_site_disorder_group # | 3 Check      |

0 **ALERT level A** = Most likely a serious problem - resolve or explain  
0 **ALERT level B** = A potentially serious problem, consider carefully  
3 **ALERT level C** = Check. Ensure it is not caused by an omission or oversight  
20 **ALERT level G** = General information/check it is not something unexpected

2 ALERT type 1 CIF construction/syntax error, inconsistent or missing data  
5 ALERT type 2 Indicator that the structure model may be wrong or deficient  
1 ALERT type 3 Indicator that the structure quality may be low  
14 ALERT type 4 Improvement, methodology, query or suggestion  
1 ALERT type 5 Informative message, check

It is advisable to attempt to resolve as many as possible of the alerts in all categories. Often the minor alerts point to easily fixed oversights, errors and omissions in your CIF or refinement strategy, so attention to these fine details can be worthwhile. In order to resolve some of the more serious problems it may be necessary to carry out additional measurements or structure refinements. However, the purpose of your study may justify the reported deviations and the more serious of these should normally be commented upon in the discussion or experimental section of a paper or in the "special\_details" fields of the CIF. checkCIF was carefully designed to identify outliers and unusual parameters, but every test has its limitations and alerts that are not important in a particular case may appear. Conversely, the absence of alerts does not guarantee there are no aspects of the results needing attention. It is up to the individual to critically assess their own results and, if necessary, seek expert advice.

### **Publication of your CIF in IUCr journals**

A basic structural check has been run on your CIF. These basic checks will be run on all CIFs submitted for publication in IUCr journals (*Acta Crystallographica*, *Journal of Applied Crystallography*, *Journal of Synchrotron Radiation*); however, if you intend to submit to *Acta Crystallographica Section C* or *E* or *IUCrData*, you should make sure that full publication checks are run on the final version of your CIF prior to submission.

### **Publication of your CIF in other journals**

Please refer to the *Notes for Authors* of the relevant journal for any special instructions relating to CIF submission.

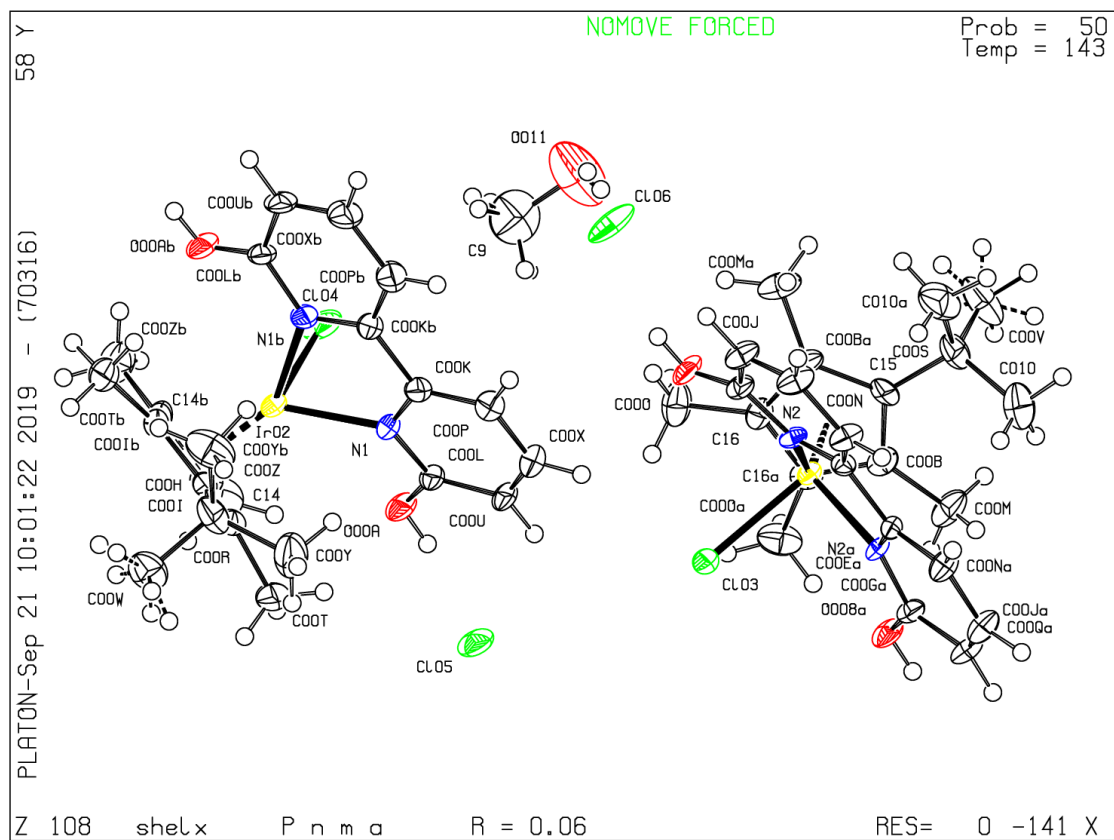

Supplement: s1 [file s1 › checkcif_complex2e.pdf]
