# Supplementary material
Source: MDPI journal article supplement (https://www.mdpi.com/2073-4344/9/10/846)
Supplement: s1 [file s1]

Archive with 7 entries (7 files):
- catalysts-613201 supp for xml.docx
- checkcif_complex1e.pdf
- checkcif_complex2a.pdf
- checkcif_complex2e.pdf
- complex1e.cif
- complex2a.cif
- complex2e.cif
