# Supplementary material
Source: MDPI journal article supplement (https://www.mdpi.com/2073-4344/9/10/846)
Supplement: s1 [file s1 › catalysts-613201 supp for xml.docx]

Supplementary Materials

Effect of a Substituent in Cyclopentadienyl Ligand on Iridium-Catalyzed Acceptorless Dehydrogenation of Alcohols and 2-Methyl-1,2,3,4-tetrahydroquinoline

Jaeyoung Jeong, Takuya Shimbayashi, and Ken-ichi Fujita*

Graduate School of Human and Environmental Studies, Kyoto University, Kyoto 606-8501, Japan;

jeong.jaeyoung.44a@st.kyoto-u.ac.jp (J.J.); shimbayashi.takuya.5z@kyoto-u.ac.jp (T.S.)

***** Correspondence: fujita.kenichi.6a@kyoto-u.ac.jp; Tel.: +81-75-753-6827

Received: 24 September 2019; Accepted: 3 October 2019; Published: xxxx

*1. General*

*2. Syntheses of [CpRIrCl2]2*

*3. Syntheses of [CpRIr(6,6’-dihydroxy-2,2’-bipyridine)Cl]Cl*

*4. Syntheses of CpRIr(2.2’-bipyridine-6,6’-dionato)H2O*

*5. Investigation of Catalytic Activity in Dehydrogenation of 1-Phenylethanol (****4****)*

*6. Investigation of Catalytic Activity in Dehydrogenation of Benzyl alcohol (****6****)*

*7. Investigation of Catalytic Activity in Dehydrogenation of 2-Octanol (****8****)*

*8.* *Investigation of Catalytic Activity in Dehydrogenation of 2-methyl-1,2,3,4-tetrahydroquinoline (****10****)*

*9. X-ray Crystallographic Analyses*

*10. NMR Charts*

*11. References*

***1. General***

1H and 13C NMR spectra were recorded on JEOL ECX-500 (500 MHz) and ECS-400 (400 MHz) spectrometers. Gas chromatography (GC) analyses were performed on a GC-4000Plus with a capillary column (InertCap for Amines and InertCap Pure WAX). Elemental analyses were carried out at the Microanalysis Center of Kyoto University. Melting points were measured by a Yanaco MP-500D under air. Dehydrated solvent was used in reaction. HCp*Ethyl(5-ethyl-1,2,3,4-tetramethylcyclopentadiene) [1], HCp**i*Pr(5-isopropyl-1,2,3,4-tetramethylcyclopentadiene) [1,2], HCp**t*Bu(5-tert-butyl-1,2,3,4-tetramethylcyclopentadiene)[3], [Cp*Ir(6,6’-dihydroxy-2,2’-bipyridine)Cl]Cl (**1b**) [4], Cp*Ir(2.2’-bipyridine-6,6’-dionato)H2O (**2b**) [5], and 6,6’-dihydroxy-2,2’-bipyridine [6] were prepared according to the literature method. All other reagents are commercially available and were used as received.

***2. Synthesis of [CpRIrCl2]2***

[(*η*5-C5Me4H)IrCl2]2 [CAS: 835614-43-2] (**1a**) [7]

Under an atmosphere of argon, IrCl3·5H2O (998.2 mg, 2.57 mmol) was placed in 50 mL two-neck flask equipped with a Dimroth condenser and three-way cock. Methanol (19.7 mL) and 1,2,3,4-tetramethylcyclopentadiene (1271.3 mg, 10.37 mmol) were added, and the mixture was stirred for 48 h at 90 °C. After cooled to r.t., orange precipitate was filtered with a glass filter, washed with Et2O (15 mL), and then dried under vacuum to give the title compound as an orange solid (355.5 mg, 0.463 mmol, 36%). 1H NMR (400 MHz, CDCl3, r.t.) *δ* 5.24 (s, 2H, CpH), 1.66 (s, 12H, CpCH3), 1.61 (s, 12H, CpCH3). 13C NMR (100.5 MHz, CDCl3, r.t.) *δ* 92.1 (s, CpC), 86.4 (s, CpC), 68.0 (s, CpC), 11.1 (s, CpCH3), 9.4 (s, CpCH3).

[Cp*EthylIrCl2]2 [CAS: 2050480-26-5] (**1c**) [1]

Under an atmosphere of argon, IrCl3·5H2O (645.6 mg, 1.66 mmol) was placed in 50 mL two-neck flask equipped with a Dimroth condenser and three-way cock. Methanol (13.0 mL) and 5-ethyl-1,2,3,4-tetramethylcyclopentadiene [1] (996.3 mg, 6.63 mmol) were added, and the mixture was stirred for 72 h at 90 °C. After cooled to r.t., the solvent was slightly removed by vacuum and orange precipitate was filtered with a glass filter, washed with Et2O (15 mL), and then dried under vacuum to give the title compound as an orange solid (458.2 mg, 0.519 mmol, 77%). 1H NMR (400 MHz, CDCl3, r.t.) *δ* 2.13 (q, 4H, *J* = 7.6 Hz, CH2), 1.58 (s, 12H, CpCH3), 1.56 (s, 12H, CpCH3), 1.05 (t, 6H, *J* = 7.6 Hz, CH3). 13C NMR (100.5 MHz, CDCl3, r.t.) *δ* 89.2 (s, CpC), 86.6 (s, CpC), 86.2 (s, CpC), 17.7 (s, CH2), 11.8 (s, CH3), 9.4 (s, CpCH3), 9.2 (s, CpCH3).

[Cp**i*PrIrCl2]2 [CAS: 1621315-48-7] (**1d**) [1,2]

Under an atmosphere of argon, IrCl3·5H2O (840.2 mg, 2.16 mmol) was placed in 50 mL two-neck flask equipped with a Dimroth condenser and three-way cock. Methanol (16.6 mL) and 5-isopropyl-1,2,3,4-tetramethylcyclopentadiene [1,2] (1440.7 mg, 8.77 mmol) were added, and the mixture was stirred for 48 h at 90 °C. After cooled to r.t., orange precipitate was filtered with a glass filter, washed with Et2O (20 mL), and then dried under vacuum to give the title compound as an orange solid (783.8 mg, 0.919 mmol, 85 %). 1H NMR (400 MHz, CDCl3, r.t.) *δ* 2.46 (sept, 2H, *J* = 7.2 Hz, CH), 1.66 (s, 12H, CpCH3), 1.58 (s, 12H, CpCH3), 1.26 (d, 12H, *J* = 7.2 Hz, CH3). 13C NMR (100.5 MHz, CDCl3, r.t.) *δ* 90.4 (s, CpC), 86.3 (s, CpC), 86.1 (s, CpC), 25.3 (s, CH), 20.7 (s, CH(CH3)2), 10.4 (s, CpCH3), 9.6 (s, CpCH3).

[Cp**t*BuIrCl2]2 (**1e**)

Under an atmosphere of argon, IrCl3·5H2O (546.5 mg, 1.41 mmol) was placed in 50 mL two-neck flask equipped with a Dimroth condenser and three-way cock. Methanol (11.1 mL) and 5-*tert*-butyl-1,2,3,4-tetramethylcyclopentadiene [3] (1010.0 mg, 5.66 mmol) were added, and the mixture was stirred for 144 h at 90 °C. After cooled to r.t., orange precipitate was filtered with a glass filter, washed with Et2O (10 mL), and then dried under vacuum to give an orange solid (276.8 mg, 0.314 mmol, 45 %). M.P. (decomp.) >277.6 °C. 1H NMR (400 MHz, CDCl3, r.t.) *δ* 1.79 (s, 12H, CpCH3), 1.61 (s, 12H, CpCH3), 1.37 (s, 18H, C(CH3)3). 13C NMR (100.5 MHz, CDCl3, r.t.) *δ* 92.1 (s, CpC), 87.4 (s, CpC), 84.8 (s, CpC), 33.8 (s, CMe3), 30.9 (s, C(CH3)3), 13.3 (s, CpCH3), 10.1 (s, CpCH3). Anal. Calcd for C26H42Cl4Ir2: C, 35.45; H, 4.81. Found: C, 35.05; H, 4.69.

***3. Synthesis of [CpRIr(6,6’-dihydroxy-2,2’-bipyridine)Cl]Cl***

[(*η*5-C5Me4H)Ir(6,6’-dihydroxy-2,2’-bipyridine)Cl]Cl (**2a**)

Under an atmosphere of argon, [(*η*5-C5Me4H)IrCl2]2 (**1a**) (49.8 mg, 0.065 mmol),6,6’-dihydroxy-2,2’-bipyridine (24.4 mg, 0.130 mmol), methanol (1.1 mL) were placed in 10 mL two-neck test tube flask equipped with a Dimroth condenser and three-way cock. The mixture was stirred for 3 h at 60 °C. After cooled to r.t., the solvent was removed under reduced pressure and the residue was dried under vacuum to give the title compound as a yellow solid (59.3 mg, 0.1036 mmol, 80%). M.P. (decomp.) >344.9 °C.1H NMR (500 MHz, CD3OD, r.t.) *δ* 7.99 (t, 2H, *J* = 7.5 Hz, aromatic), 7.93 (d, 2H, *J* = 7.5 Hz, aromatic), 7.12 (d, 2H, *J* = 8.0 Hz, aromatic), 5.87 (s, CpH), 1.73 (s, Cp(CH)3), 1.68 (s, Cp(CH)3). 13C NMR (100.5 MHz, CD3OD, r.t.) *δ* 165.4 (s, aromatic), 156.1 (s, aromatic), 143.3 (s, aromatic), 116.4 (s, aromatic), 113.9 (s, aromatic), 92.3 (s, CpC), 91.9 (s, CpC), 77.3 (s, CpC), 10.7 (s, CH3), 10.0 (s, CH3). Anal. Calcd for C19H21Cl2IrN2O2: C, 39.86; H, 3.70; N, 4.89. Found: C, 39.69; H, 3.68; N, 4.77.

[Cp*EthylIr(6,6’-dihydroxy-2,2’-bipyridine)Cl]Cl (**2c**)

Under an atmosphere of argon, [Cp*EthylIrCl2]2 (**1c**) (106.1 mg, 0.13 mmol), 6,6’-dihydroxy-2,2’-bipyridine (48.7 mg, 0.26 mmol), methanol (2.0 mL) were placed in 10 mL two-neck test tube flask equipped with a Dimroth condenser and three-way cock. The mixture was stirred for 3 h at 60 °C. After cooled to r.t., the solvent was removed under reduced pressure and the residue was dried under vacuum to give the title compound as a yellow solid (121 mg, 0.201 mmol, 78 %). M.P. (decomp.) >344.7 °C. 1H NMR (400 MHz, CD3OD, r.t.) *δ* 7.97 (t, 2H, *J* = 8.0 Hz, aromatic), 7.89 (d, 2H, *J* = 7.8 Hz, aromatic), 7.07 (d, 2H, *J* = 8.2 Hz, aromatic), 2.12 (q, 2H, *J* = 7.6 Hz, CH2), 1.67 (s, 6H, Cp(CH)3), 1.66 (s, 6H, Cp(CH)3), 1.05 (t, 3H, *J* = 8.0 Hz, CH3). 13C NMR (100.5 MHz, CD3OD, r.t.) *δ* 164.1 (s, aromatic), 154.5 (s, aromatic), 142.0 (s, aromatic), 114.8 (s, aromatic), 112.7 (s, aromatic), 91.2 (s, CpC), 89.6 (s, CpC), 88.9 (s, CpC), 17.3 (s, CH2), 11.0 (s, CH3), 8.4 (s, CpCH3), 8.3 (s, CpCH3). Anal. Calcd for C21H25Cl2IrN2O2: C, 42.00; H, 4.20; N, 4.66. Found: C, 41.90; H, 4.38; N, 4.53.

[Cp**i*PrIr(6,6’-dihydroxy-2,2’-bipyridine)Cl]Cl (**2d**)

Under an atmosphere of argon, [Cp**i*PrIrCl2]2 (**1d**) (101.6 mg, 0.12 mmol),6,6’-dihydroxy-2,2’-bipyridine (44.8 mg, 0.24 mmol), and methanol (2.0 mL) were placed in 10 mL two-neck test tube flask equipped with a Dimroth condenser and three-way cock. The mixture was stirred for 3 h at 60 °C. After cooled to r.t., the solvent was removed under reduced pressure and the residue was dried under vacuum to give the title compound as a yellow solid (121.3 mg, 0.197 mmol, 83 %). M.P. (decomp.) >342.3 °C. 1H NMR (400 MHz, CD3OD, r.t.) *δ* 7.97 (t, 2H, *J* = 7.6 Hz, aromatic), 7.90 (d, 2H, *J* = 7.8 Hz, aromatic), 7.08 (d, 2H, *J* = 8.2 Hz, aromatic), 2,38 (sept, 1H, *J* = 7.6 Hz, CH), 1.79 (s, 6H, CpCH3), 1.73 (s, 6H, CpCH3), 0.99 (d, 6H, *J* = 7.2 Hz, CH3). 13C NMR (100.5 MHz, CD3OD, r.t.) δ 165.5 (s, aromatic), 156.1 (s, aromatic), 143.4 (s, aromatic), 116.1 (s, aromatic), 114.1 (s, aromatic), 98.2 (s, CpC), 88.3 (s, CpC), 86.9 (s, CpC), 26.8 (s, CH), 20.5 (s, CH3), 11.6 (s, CpCH3), 9.4 (s, CpCH3). Anal. Calcd for C22H27Cl2IrN2O2: C, 43.00; H, 4.43; N, 4.56. Found: C, 42.60; H, 4.74; N, 4.42.

[Cp**t*BuIr(6,6’-dihydroxy-2,2’-bipyridine)Cl]Cl (**2e**)

Under an atmosphere of argon, [Cp*tBuIrCl2]2 (**1e**) (36.3 mg, 0.04 mmol), 6,6’-dihydroxy-2,2’-bipyridine (15.7 mg, 0.08 mmol), and methanol 0.7 mL were placed in 10 ml two-neck test tube flask equipped with a Dimroth condenser and three-way cock. The mixture was stirred for 3 h at 60 °C. After cooled to r.t., the solvent was removed under reduced pressure and the residue was dried under vacuum to give the title compound as a yellow solid (44.2 mg, 0.0703 mmol, 86 %). M.P. (decomp.) >344.6 °C. 1H NMR (400 MHz, CD3OD, r.t.) δ 7.99 (t, 2H, J = 7.6 Hz, aromatic), 7.94 (d, 2H, J = 8.0 Hz, aromatic), 7.08 (d, 2H, J = 8.0 Hz, aromatic), 1.88 (s, 6H, CpCH3), 1.82 (s, 6H, CpCH3), 0.93 (s, 9H, CH3). 13C NMR (100.5 MHz, CD3OD, r.t.) δ 165.4 (s, aromatic), 156.2 (s, aromatic), 143.5 (s, aromatic), 116.1 (s, aromatic), 114.2 (s, aromatic), 101.8 (s, CpC), 88.9 (s, CpC), 84.4 (s, CpC), 34.3 (s, CMe3), 30.3 (s, CH3), 15.0 (s, CpCH3), 9.6 (s, CpCH3).

***4. Synthesis of CpRIr(2.2’-bipyridine-6,6’-dionato)H2O***

(*η*5-C5Me4H)Ir(2,2’-bipyridine-6,6’-dionato)H2O (**3a**)

Under an atmosphere of argon, [(*η*5-C5Me4H)IrCl2]2 (**1a**) (203.8 mg, 0.27 mmol), 6,6’-dihydroxy-2,2’-bipyridine (99.8 mg, 0.53 mmol), methanol 6.4 mL were placed in 30 mL two-neck round flask equipped with a Dimroth condenser and three-way cock. The mixture was stirred for 3 h at 60 °C. After cooled to r.t., the solvent was removed under reduced pressure and the residue was dried under vacuum overnight to give a yellow solid. Sodium tert-butoxide (102.6 mg, 1.07 mmol) and degassed H2O (9.3 mL) were added to the same flask and stirred for 3 h at r.t.. After the reaction, the precipitate was filtered by cannulation through glass filter under argon atmosphere and dried under vacuum. CH2Cl2 (35 mL) was added to dissolve the solid. Solution was collected in flask and the solvent was evaporated. CH2Cl2 (1 mL) was added, followed by the addition of hexane (15 mL) for reprecipitation. Resulted solid was filtered with glass filter and washed with H­2O (10 mL), affording the title compound as a green yellow solid (158.3 mg, 0.306 mmol, 57%) after drying under vacuum. M.P. (decomp.) >288.9 °C. 1H NMR (400 MHz, CD3OD, r.t.) δ 7.45 (br t, 2H, *J* = 8.0 Hz, aromatic), 6.71 (br d, 2H, *J* = 7.2 Hz, aromatic), 6.51 (br d, 2H, *J* = 6.8 Hz aromatic), 5.85 (br s, 1H, CpH), 1.72 (br s, 6H, CpCH3), 1.52 (br s, 6H, CpCH3). 1H NMR (500 MHz, CD3OD, 60 °C) δ 7.23 (t, 2H, , *J* = 12 Hz, aromatic), 6.92 (d, 2H, *J* = 9.0 Hz, aromatic), 6.64 (br, 2H, aromatic), 5.60 (br, 1H, CpH), 1.59 (s, 6H, CpCH3), 1.43 (s, 6H, CpCH3). 13C NMR (100.5 MHz, CD3OD, 60 °C) δ 171.4 (s, aromatic), 157.7 (s, aromatic), 139.7 (s, aromatic), 118.5 (s, aromatic), 107.5 (s, aromatic), 92.0 (s, CpC), 88.7 (s, CpC), 74.4 (s, CpC), 10.7 (s, CpCH3), 9.9 (s, CpCH3). Anal. Calcd for C19H21IrN2O3: C, 44.09; H, 4.09; N, 5.41. Found: C, 43.84; H, 3.96; N, 5.39.

Cp*EthylIr(2,2’-bipyridine-6,6’-dionato)H2O (**3c**)

Under an atmosphere of argon, [Cp*EthylIrCl2]2(**1c**) (198.2 mg, 0.24 mmol), 6,6’-dihydroxy-2,2’-bipyridine (90.4 mg, 0.48 mmol), and methanol (5.8 mL) were placed in 30 mL two-neck round flask equipped with a Dimroth condenser and three-way cock. The mixture was stirred for 3 h at 60 °C. After cooled to r.t., the solvent was removed under reduced pressure and the residue was dried under vacuum overnight to give a yellow solid. Sodium tert-butoxide (92.3 mg, 0.96 mmol) and degassed H2O (8.4 mL) were added to the same flask and stirred for 3 h at r.t. After the reaction, the precipitate was filtered by cannulation through glass filter under argon atmosphere and dried under vacuum. CH2Cl2 (35 mL) was added to dissolve the solid. Solution was collected in flask and the solvent was evaporated. CH2Cl2 (1 mL) was added, followed by the addition of hexane (15 mL) for reprecipitation. Resulted solid was filtered with glass filter and washed with H2O (8 mL). The title compound was obtained as a green yellow solid (141.3 mg, 0.259 mmol, 57%) after drying under vacuum. M.P. (decomp.) >272.3 °C. 1H NMR (400 MHz, CD3OD, 60 °C) δ 7.42 (t, 2H, *J* = 6.5 Hz, aromatic), 6.90 (d, 2H, *J* = 6.5 Hz, aromatic), 6.52 (br s, 2H, aromatic), 1.95 (br s, 2H, CH2), 1.47 (s, 12H, CpCH3), 0.93 (br s, 3H, CH3). 13C NMR (100.5 MHz, CD3OD, 60 °C) δ 171.3 (s, aromatic), 157.2 (s, aromatic), 139.5 (s, aromatic), 118.3 (s, aromatic), 106.7 (s, aromatic), 90.0 (s, CpC), 88.2 (s, CpC, two peaks may be overlapped), 18.7 (s, CH), 11.9 (s, CH3), 9.7 (s, CpCH3, two peaks may be overlapped). Anal. Calcd for C21H25IrN2O3: C, 46.23; H, 4.62; N, 5.13. Found: C, 46.13; H, 4.56; N, 5.11.

Cp**i*PrIr(2,2’-bipyridine-6,6’-dionato)H2O (**3d**)

Under an atmosphere of argon, [Cp**i*PrIrCl2]2 (**1d**) (159.3 mg, 0.19 mmol), 6,6’-dihydroxy-2,2’-bipyridine (70.8 mg, 0.38 mmol), and methanol (4.4 mL) were placed in 30 ml two-neck round flask equipped with a Dimroth condenser and three-way cock. The mixture was stirred for 3 h at 60 °C. After cooled to r.t., the solvent was removed under reduced pressure and the residue was dried with vacuum overnight to give a yellow solid. Sodium tert-butoxide (71.8 mg, 0.75 mmol) and degassed H2O (6.6 mL) were added to the same flask and stirred for 3 h at r.t.. After the reaction, the precipitate was filtered by cannulation through glass filter under argon atmosphere and dried under vacuum. CHCl3 (35 mL) was added to dissolve the solid. The solution was collected in flask and solvent was evaporated. CHCl3 (1 mL) was added, followed by the addition of hexane (10 mL) for reprecipitation. Resulted solid was filtered with glass filter and washed with H2O (8 mL). Title compound was obtained as a green yellow solid (87 mg, 0.155 mmol, 42 %) after drying under reduced pressure. M.P. (decomp.) >274.7 °C. 1H NMR (400 MHz, CD3OD, r.t.) δ 7.43 (t, 2H, *J* = 7.6 Hz, aromatic), 6.93 (d, 2H, *J* = 6.0 Hz, aromatic), 6.42 (d, 2H, *J* = 7.2 Hz, aromatic), 2.16 (br sept, 1H, *J* = 3.6 Hz CH), 1.83 (br s, 6H, CpCH3), 1.71 (br s, 6H, CpCH3), 0.94 (br d, 6H, *J* = 6.4 Hz, CH3). 1H NMR (400 MHz, CD3OD, 60 °C) δ 7.40 (t, 2H, *J* = 10.5 Hz, aromatic), 6.88 (d, 2H, *J* = 9.0 Hz, aromatic), 6.43 (br s, 2H, *J* = 11.0 Hz, aromatic), 2.22 (sept, 1H, *J* = 9.0 Hz, CH), 1.77 (s, 6H, CpCH3), 1.70 (s, 6H, CpCH3), 0.97 (d, 6H, *J* = 9.0 Hz, CH3). 13C NMR (100.5 MHz, CD3OD, 60 °C) δ 171.2 (s, aromatic), 157.6 (s, aromatic), 139.6 (s, aromatic), 118.2 (s, aromatic), 106.4 (s, aromatic), 94.5 (s, CpC), 89.0 (s, CpC), 81.5 (s, CpC), 26.8 (s, CH), 20.1 (s, CH3), 11.2 (s, CpCH3), 9.7 (s, CpCH3). Anal. Calcd for C22H27IrN2O3: C, 47.21; H, 4.86; N, 5.01. Found: C, 47.41; H, 4.98; N, 4.90.

Cp**t*BuIr(2,2’-bipyridine-6,6’-dionato)H2O (**3e**)

Under an atmosphere of argon, [Cp*t*BuIrCl2]2 (**1e**) (146.5 mg, 0.17 mmol), 6,6’-dihydroxy-2,2’-bipyridine (63.2 mg, 0.34 mmol), and methanol (4.0 mL) were placed in 30 mL two-neck round flask equipped with a Dimroth condenser and three-way cock. The mixture was stirred for 3 h at 60 °C. After cooled to r.t., the solvent was removed under reduced pressure and dried under vacuum overnight to give a yellow solid. Sodium tert-butoxide (65.5 mg, 0.68 mmol) and degassed H2O (6.6 mL) were added to the same flask and stirred for 3 h at r.t.. After the reaction, the precipitate was filtered by cannulation through glass filter under argon atmosphere and dried under vacuum. CHCl3 (55 mL) was added to dissolve the solid. The solution was collected in flask and solvent was evaporated. CHCl3 (1 mL) was added, followed by the addition of hexane (15 mL) for reprecipitation. Resulted solid was filtered with glass filter and washed with H2O (10 mL). The title compound was obtained as a green yellow solid (121.1 mg, 0.211 mmol, 63.6 %) after drying under vacuum. M.P. (decomp.) >280.2 °C. 1H NMR (400 MHz, CD3OD, r.t.) δ 7.43 (t, 2H, *J* = 7.6 Hz, aromatic), 6.96 (d, 2H, *J* = 6.8 Hz, aromatic), 6.43 (br d, 2H, *J* = 4.8 Hz), 1.93 (s, CpCH3), 1.80 (s, CpCH3), 0,90 (s, CH3), 13C NMR (100.5 MHz, CD3OD, r.t.) δ 170.7 (s, aromatic), 157.8 (s, aromatic), 140.0 (s, aromatic), 118.1 (s, aromatic), 106.8 (s, aromatic), 100.2 (s, CpC), 90.6 (s, CpC), 74.5 (s, CpC), 33.7 (s, CH), 29.8 (s, CH3), 14.8 (s, CpCH3), 10.1 (s, CpCH3), Anal. Calcd for C23H29IrN2O3: C, 48.15; H, 5.10; N, 4.88. Found: C, 48.36; H, 5.15; N, 4.90.

***5. Investigation of Catalytic Activity in Dehydrogenation of 1-Phenylethanol (4)***

Under an atmosphere of argon, Ir catalyst (1.0 mol%), THF (6.0 mL), 1-phenylethanol (**4**) (1.0 mmol) were placed in 50 mL two-neck round flask equipped with a Dimroth condenser and three-way cock. It was stirred for 1 h at 106 °C (oil bath temperature) under the reflux. After the reaction, THF (24 mL) and undecane (internal standard) were added and stirred. Conversion and yield were determined by GC. Average of three runs are shown.

***6. Investigation of Catalytic Activity in Dehydrogenation of Benzyl alcohol (6)***

Under an atmosphere of argon, Ir catalyst (0.5 mol%), toluene (20 mL), benzylalcohol (**6**) (0.5 mmol) were placed in 50 mL two-neck round flask equipped with a Dimroth condenser and three-way cock. It was stirred for 1 h at 131 °C (oil bath temperature) under the reflux. After the reaction, toluene (10 mL) and biphenyl (internal standard) were added and stirred. Conversion and yield were determined by GC.

***7. Investigation of Catalytic Activity in Dehydrogenation of 2-Octanol (8)***

Under an atmosphere of argon, Ir catalyst **3** (1.0 mol%), THF (6 mL), 2-octanol (**8**) (1.0 mmol) were placed in 30 mL two-neck round flask equipped with a Dimroth condenser and three-way cock. It was stirred at 131 °C (oil bath temperature) under the reflux. After reaction, toluene (14 mL) and biphenyl (internal standard) were added and stirred. Conversion and yield were determined by GC.

***8. Investigation of Catalytic Activity in Dehydrogenation of 2-methyl-1,2,3,4-tetrahydroquinoline (10)***

Under an atmosphere of argon, Ir catalyst **3** (1.0 mol%), toluene (3 mL), 2-methyl-1,2,3,4-tetrahydroquinoline (**10**) (1.0 mmol) were placed in 30 mL two-neck round flask equipped with a Dimroth condenser and three-way cock. It was stirred for 20 h at 131 °C (oil bath temperature) under the reflux. After reaction, toluene (14 mL) and undecane (internal standard) were added and stirred. Conversion and yield were determined by GC.

***9. X-ray Crystallographic analyses***

Crystallographic data of **1e** was collected on a Rigaku/R Axis Rapid diffractometer with CrystalClear (Rigaku). Crystallographic data of **2a** and **2e** were collected on a Rigaku/Saturn 70 CCD diffractometer and processed with CrystalClear (Rigaku). Calculations for **1e** was performed with the CrystalStructure software package (Rigaku). Calculations for **2a** and **2e** were performed with the Olex2 software package (Rigaku).


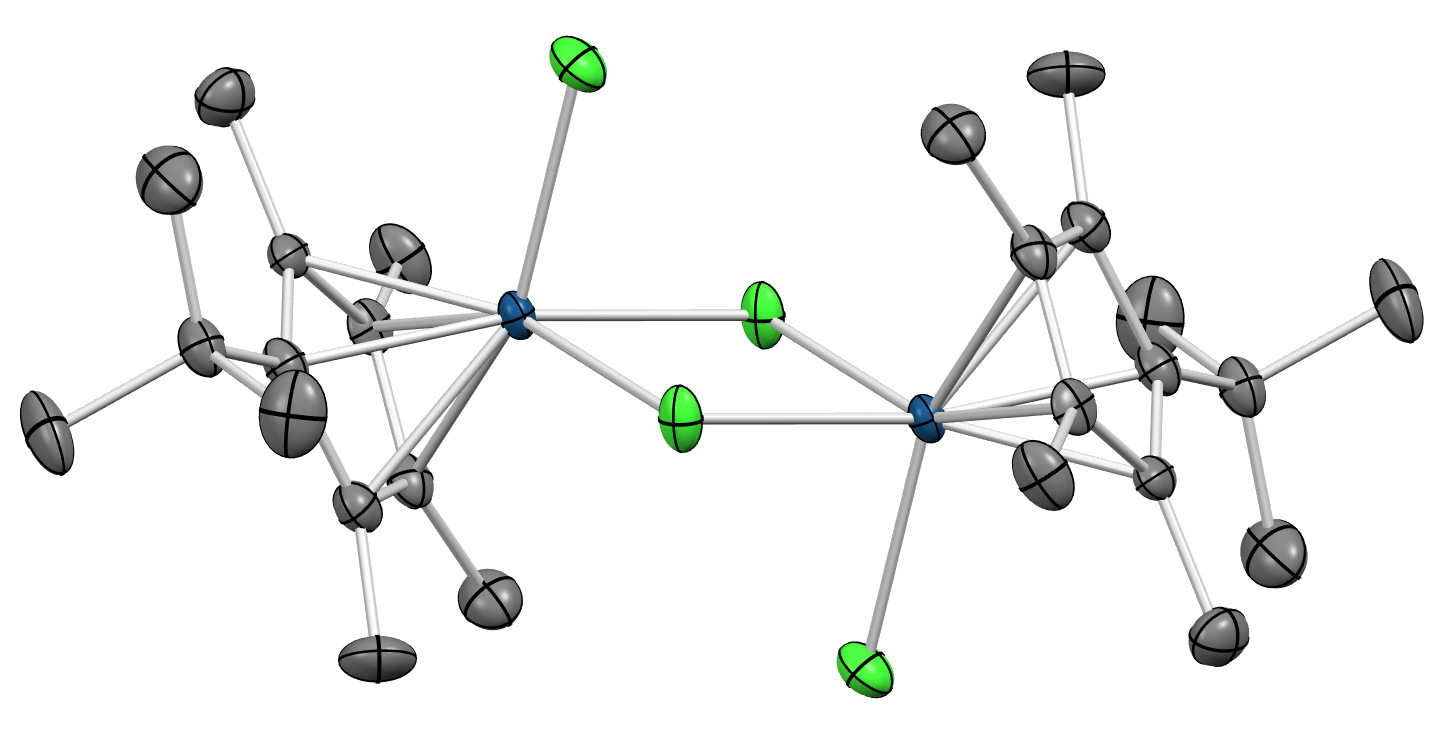


**Figure S1.** ORTEP illustration of **1e**. Hydrogen atoms are omitted for clarity.

**Table S1.** Crystal data of **1e**.

| Empirical Formula | C26H42Cl4Ir2 |
| --- | --- |
| Formula Weight | 880.87 |
| Crystal Color, Habit | orange, block |
| Crystal System | triclinic |
| Lattice Parameters |  |
| *a* (Å) | 8.3751(10) |
| *b* (Å) | 9.2021(9) |
| *c* (Å) | 9.6358(11) |
| *α* (°) | 102.832(3) |
| *β* (°) | 99.083(4) |
| *γ* (°) | 100.880(3) |
| *V* (Å3) | 695.41(13) |
| Space Group | P-1 (#2) |
| Z value | 1 |
| Dcalc (g cm–3) | 2.103 |
| *F*000 | 420.00 |
| Radiation | MoKα (λ = 0.71075 Å) |
|  | graphite monochromated |
| Temperature (°C) | –100.0 |
| Max 2θ (°) | 54.9 |
| No. of Reflections Measured | Total: 6650 |
| Structure Solution | Direct Methods (SIR92) |
| Refinement | Full-matrix least-squares on F2 |
| No. Observations (All reflections) | 3092 |
| No. Variables | 166 |
| Reflection/Parameter Ratio | 18.63 |
| Residuals: *R1; wR2* | 0.0296; 0.0389 |
| Residuals: *R* (All reflections) | 0.0304 |
| Goodness of Fit Indicator | 1.003 |
| Max Shift/Error in Final Cycle | 0.000 |
| Maximum peak in Final Diff. Map (e- Å–3) | 2.24 |
| Minimum peak in Final Diff. Map (e- Å–3) | –2.18 |

**Table S2.** Crystal data of **2a**.

| Empirical Formula | C20H25Cl2N2O3Ir |
| --- | --- |
| Formula Weight | 604.52 |
| Crystal Color, Habit | yellow, platelet |
| Crystal System | orthorhombic |
| Lattice Parameters |  |
| *a* (Å) | 16.891(2) |
| *b* (Å) | 14.4978(18) |
| *c* (Å) | 17.310(2) |
| *V* (Å3) | 4238.8(9) |
| Space Group | P*bca* (#61) |
| Z value | 8 |
| Dcalc (g cm–3) | 1.895 |
| *F*000 | 2352.0 |
| Radiation | MoKα (λ = 0.71075 Å) |
|  | graphite monochromated |
| Temperature (°C) | –100.0 |
| Max 2θ (°) | 55.0 |
| No. of Reflections Measured | Total: 32707 |
| Structure Solution | Direct Methods (SHELXT Version 2015) |
| Refinement | Full-matrix least-squares on F2 |
| No. Observations (All reflections) | 4852 |
| No. Variables | 261 |
| Reflection/Parameter Ratio | 18.59 |
| Residuals: *R1; wR2* | 0.0416; 0.1070 |
| Residuals: *R* (All reflections) | 0.0450 |
| Goodness of Fit Indicator | 1.033 |
| Max Shift/Error in Final Cycle | 0.002 |
| Maximum peak in Final Diff. Map (e- Å–3) | 2.371 |
| Minimum peak in Final Diff. Map (e- Å–3) | –4.090 |

**Table S3.** Crystal data of **2e**.

| Empirical Formula | C47H62Cl4N4O5Ir2 |
| --- | --- |
| Formula Weight | 1289.20 |
| Crystal Color, Habit | yellow, platelet |
| Crystal System | orthorhombic |
| Lattice Parameters |  |
| *a* (Å) | 13.240(3) |
| *b* (Å) | 11.975(2) |
| *c* (Å) | 32.330(6) |
| *V* (Å3) | 5125.9(18) |
| Space Group | P*nma* (#62) |
| Z value | 4 |
| Dcalc (g cm–3) | 1.671 |
| *F*000 | 2536.0 |
| Radiation | MoKα (λ = 0.71075 Å) |
|  | graphite monochromated |
| Temperature (°C) | –130.0 |
| Max 2θ (°) | 55.0 |
| No. of Reflections Measured | Total: 40989 |
| Structure Solution | Direct Methods (SHELXT Version 2015) |
| Refinement | Full-matrix least-squares on F2 |
| No. Observations (All reflections) | 6136 |
| No. Variables | 312 |
| Reflection/Parameter Ratio | 19.67 |
| Residuals: *R1; wR2* | 0.0584; 0.1362 |
| Residuals: *R* (All reflections) | 0.0628 |
| Goodness of Fit Indicator | 1.170 |
| Max Shift/Error in Final Cycle | 0.001 |
| Maximum peak in Final Diff. Map (e- Å–3) | 2.961 |
| Minimum peak in Final Diff. Map (e- Å–3) | –2.022 |

***10. NMR Charts***


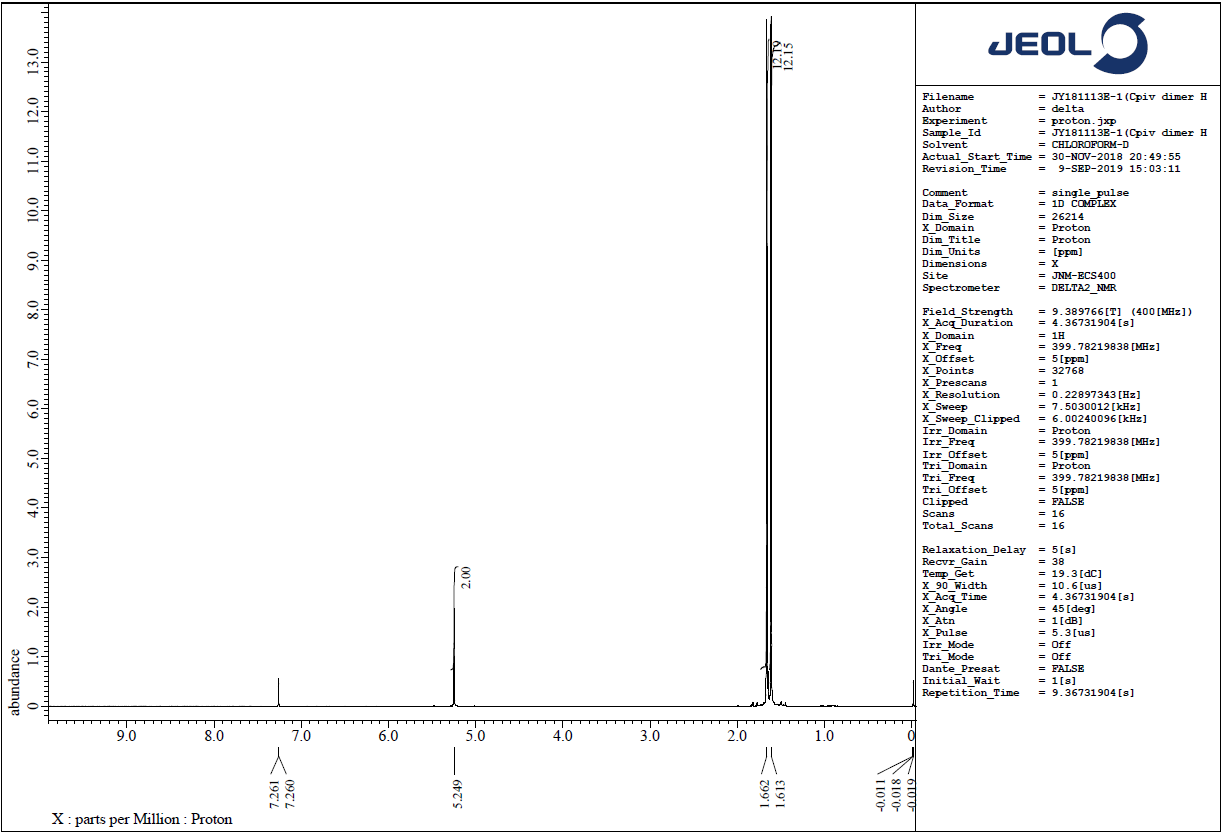


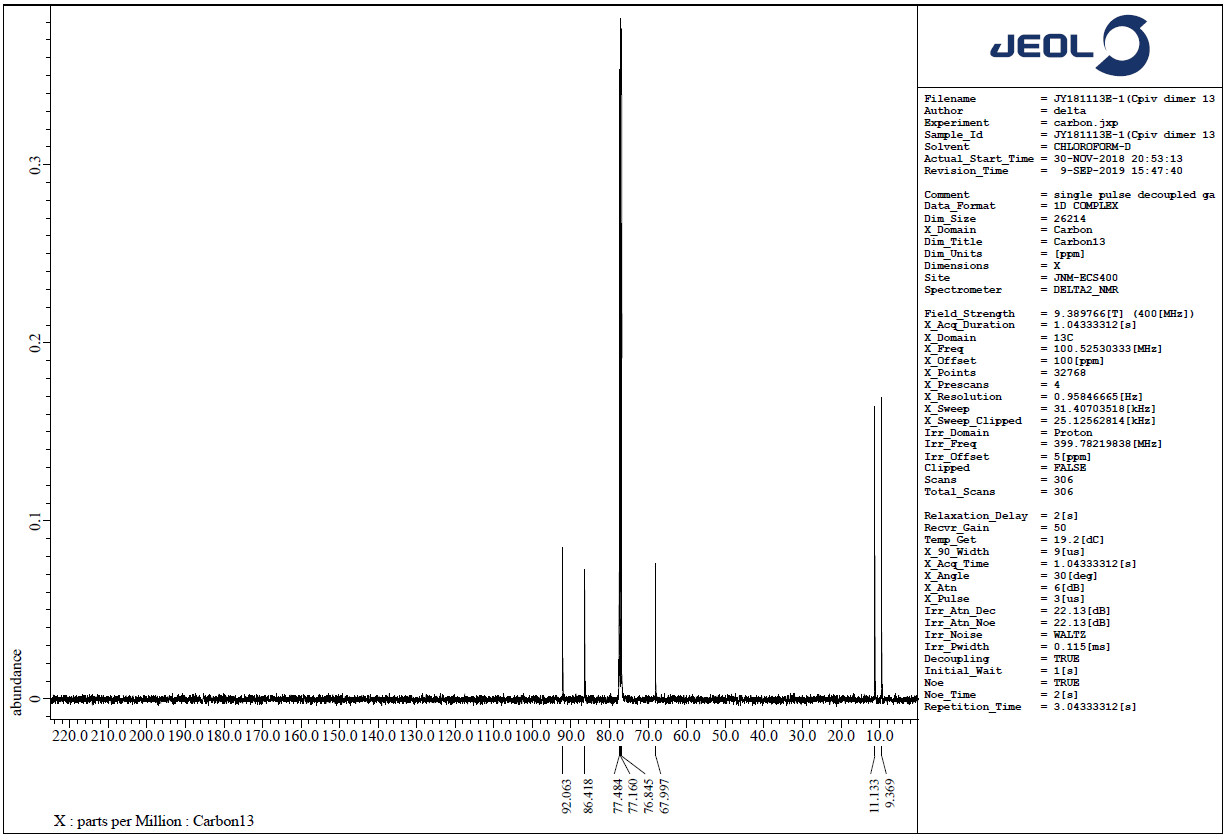


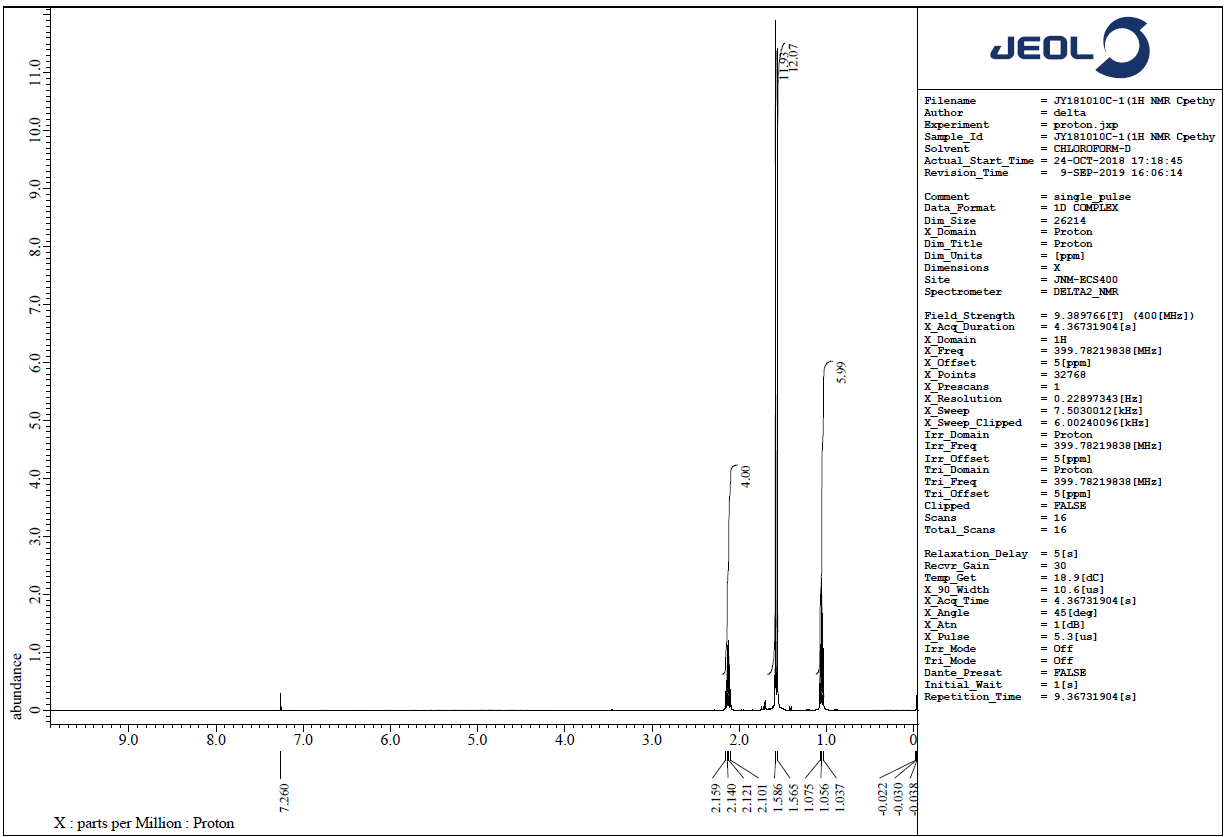


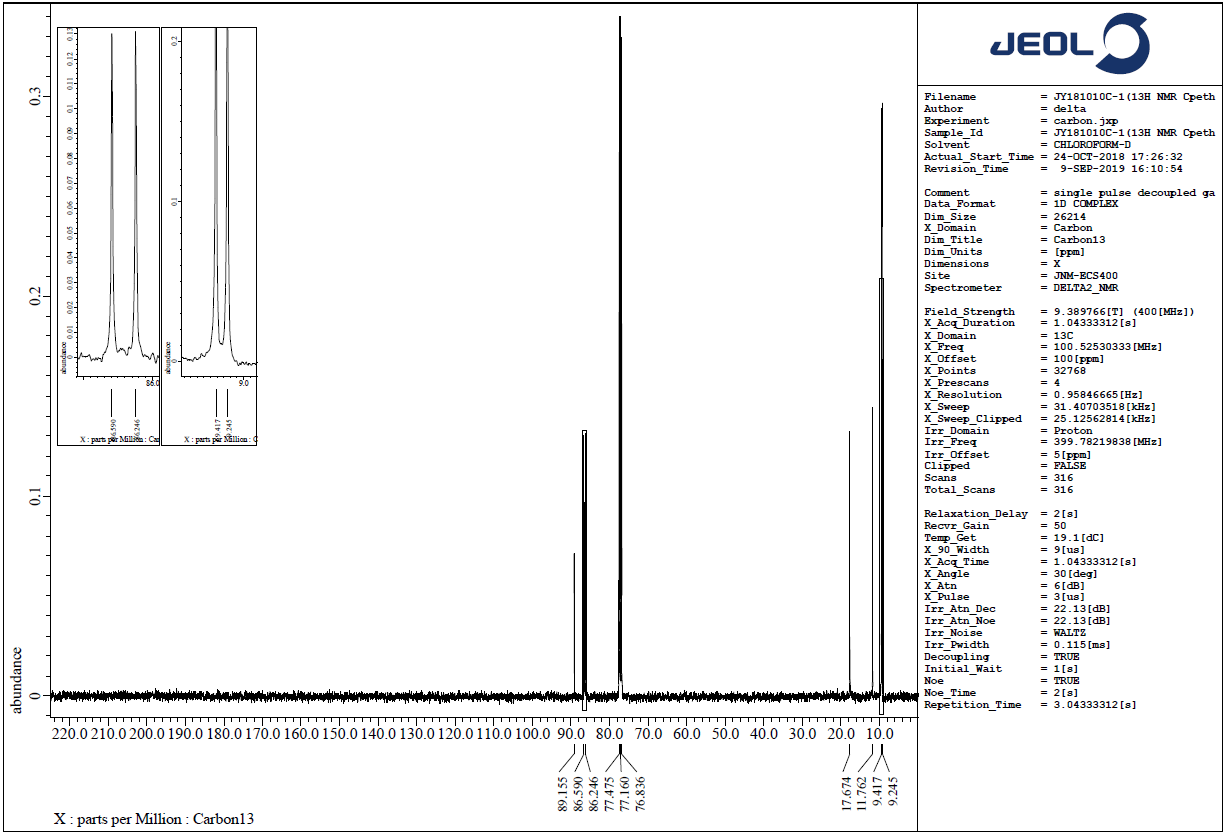


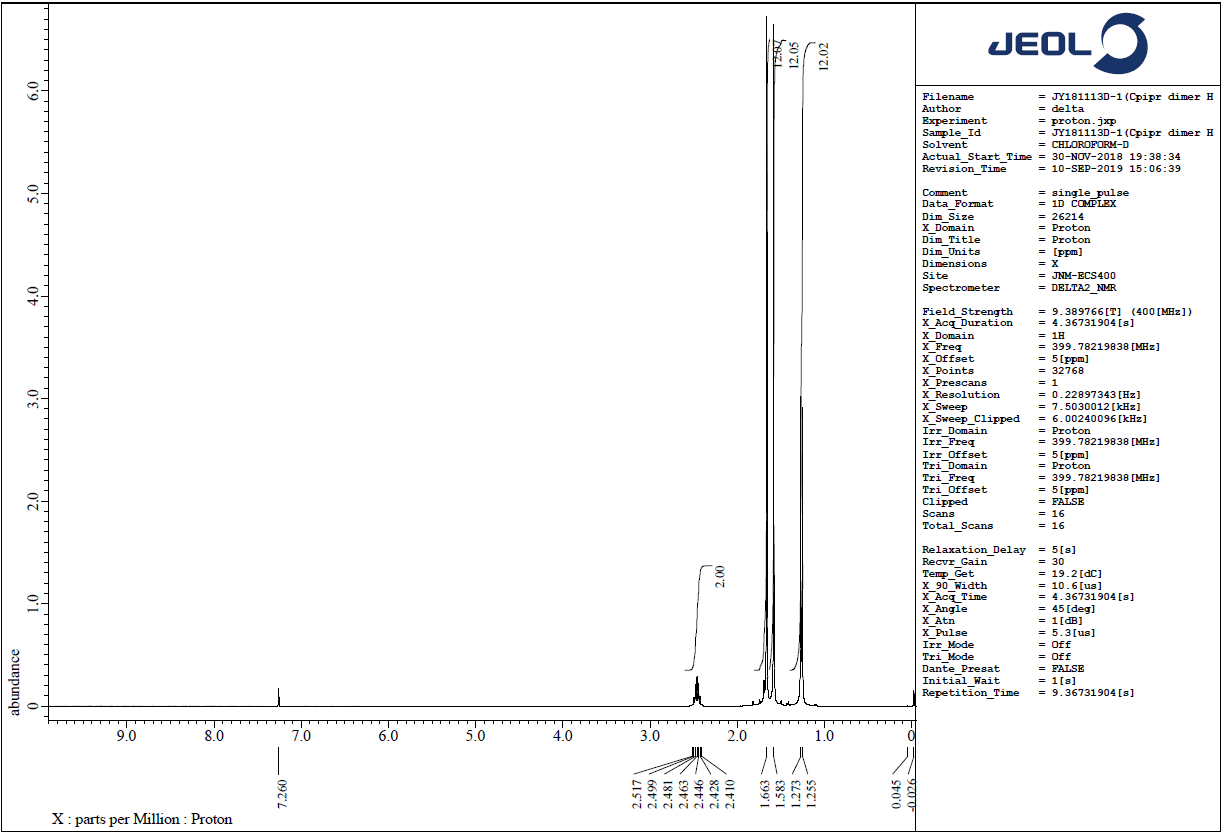


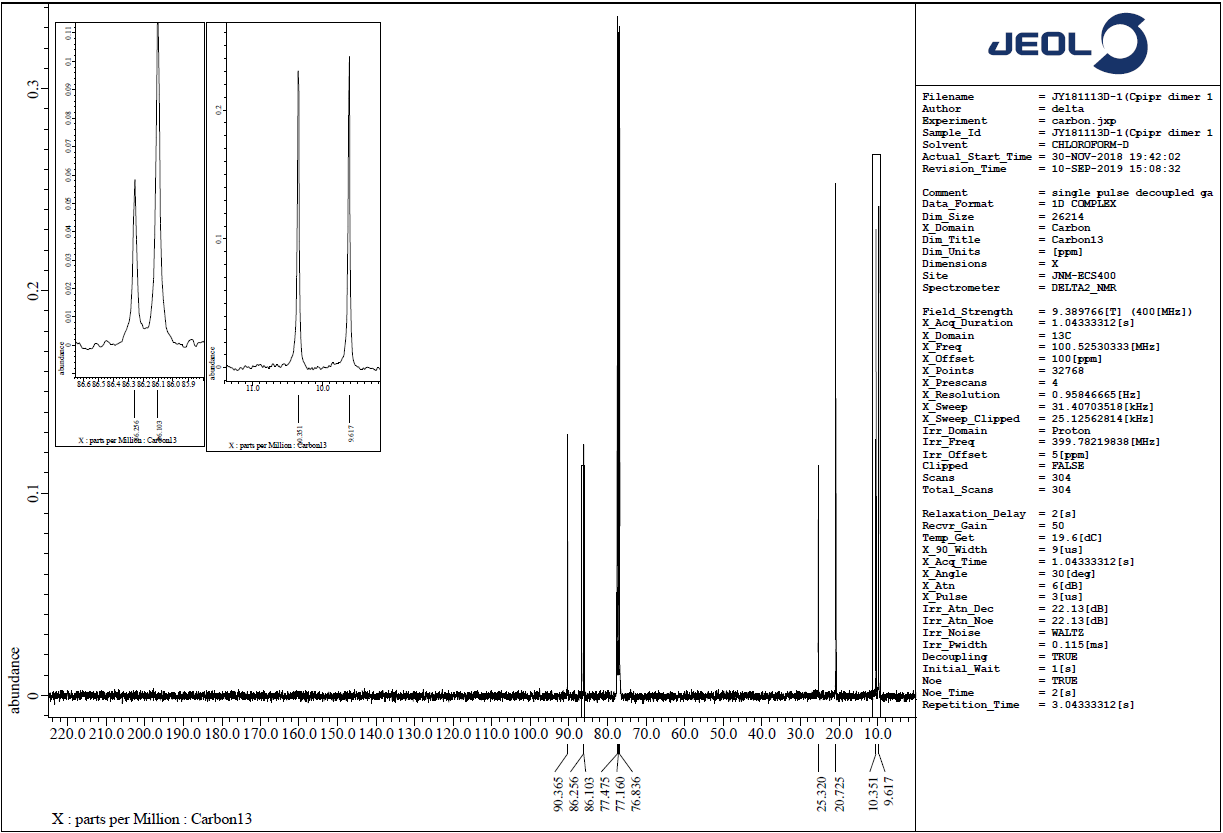


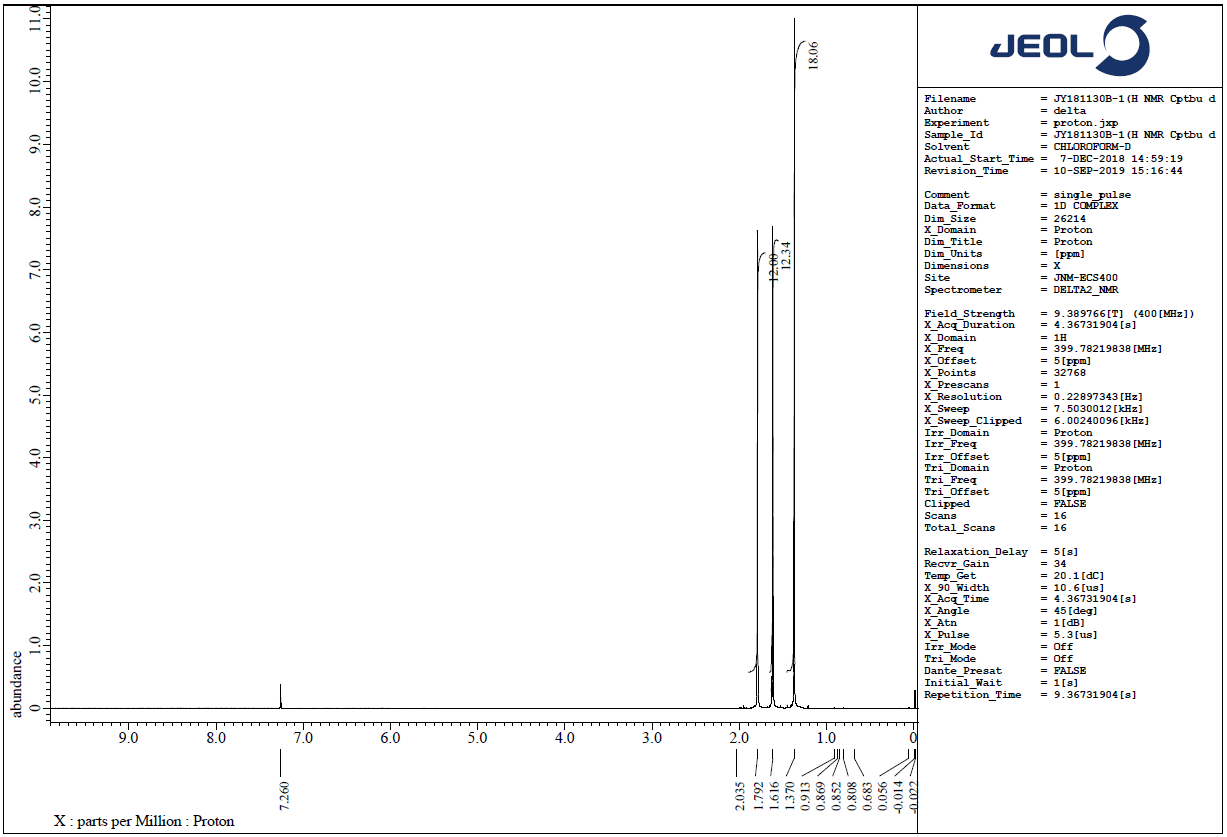


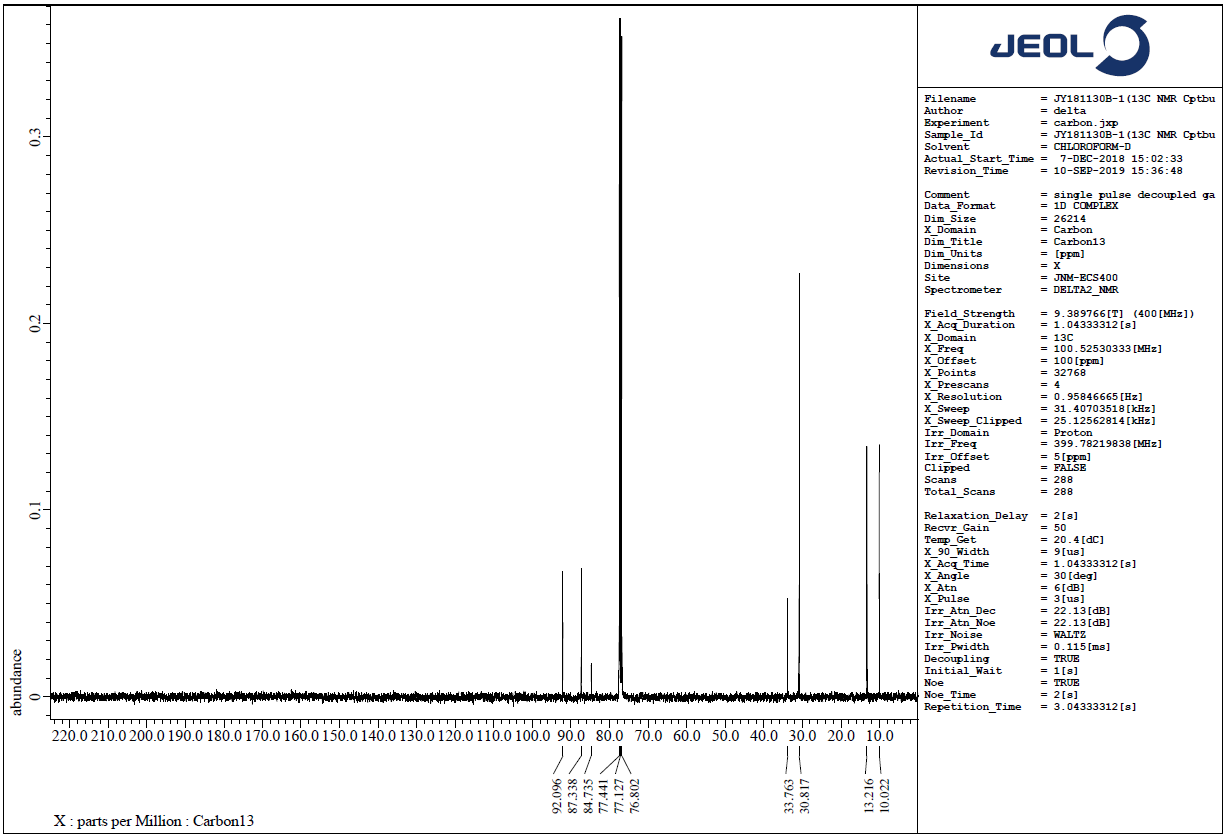


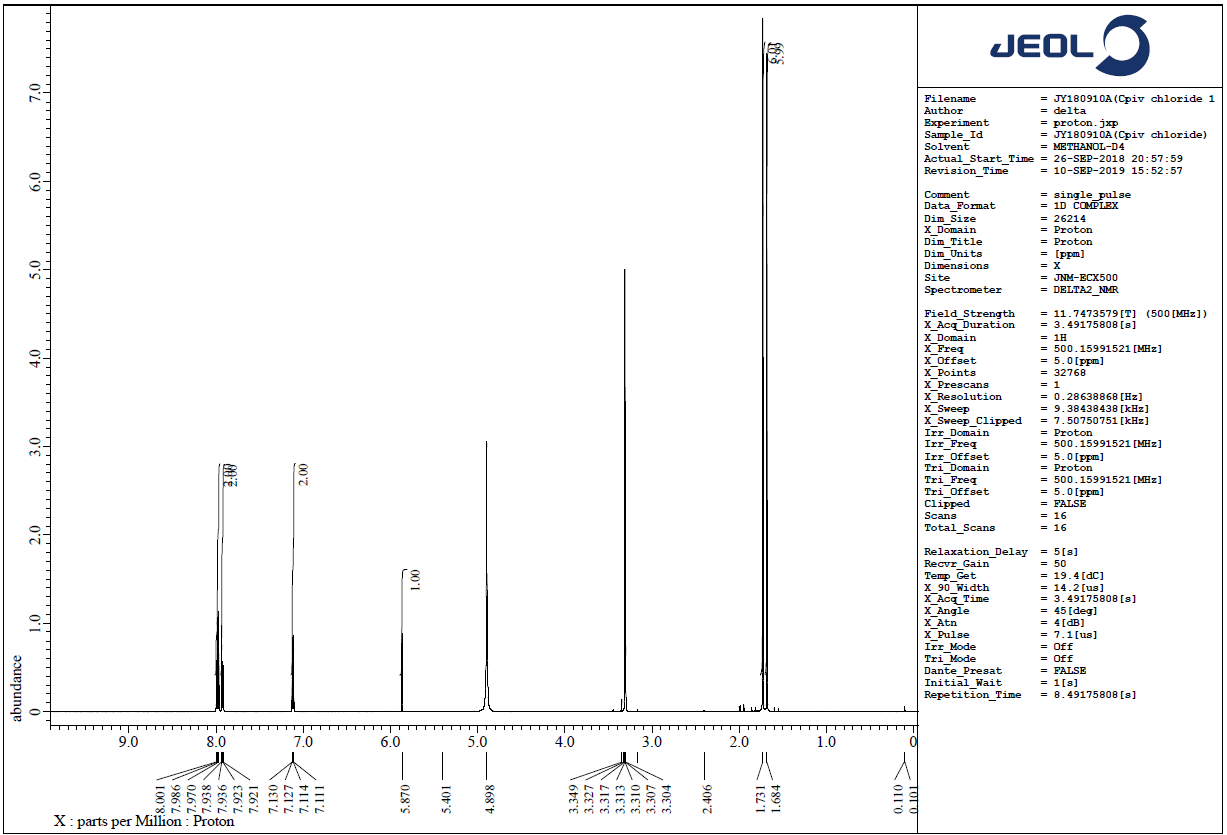


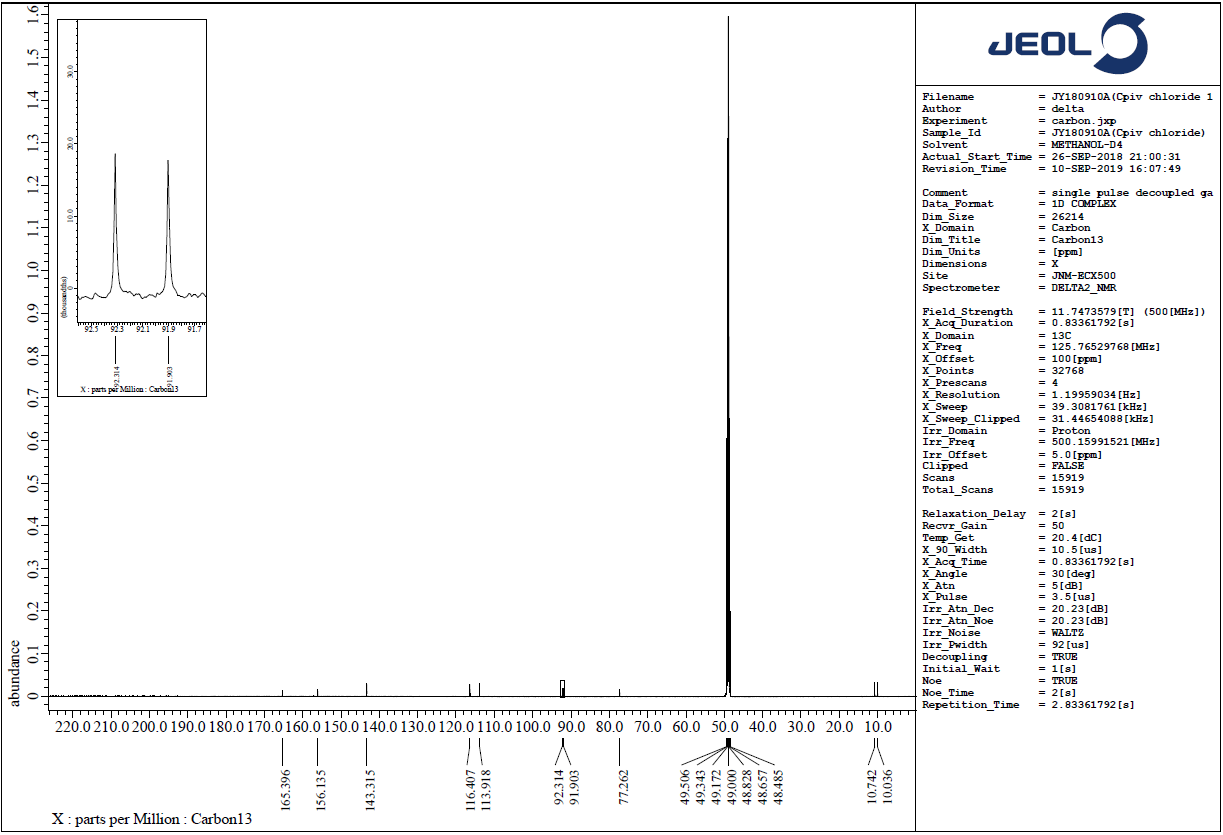


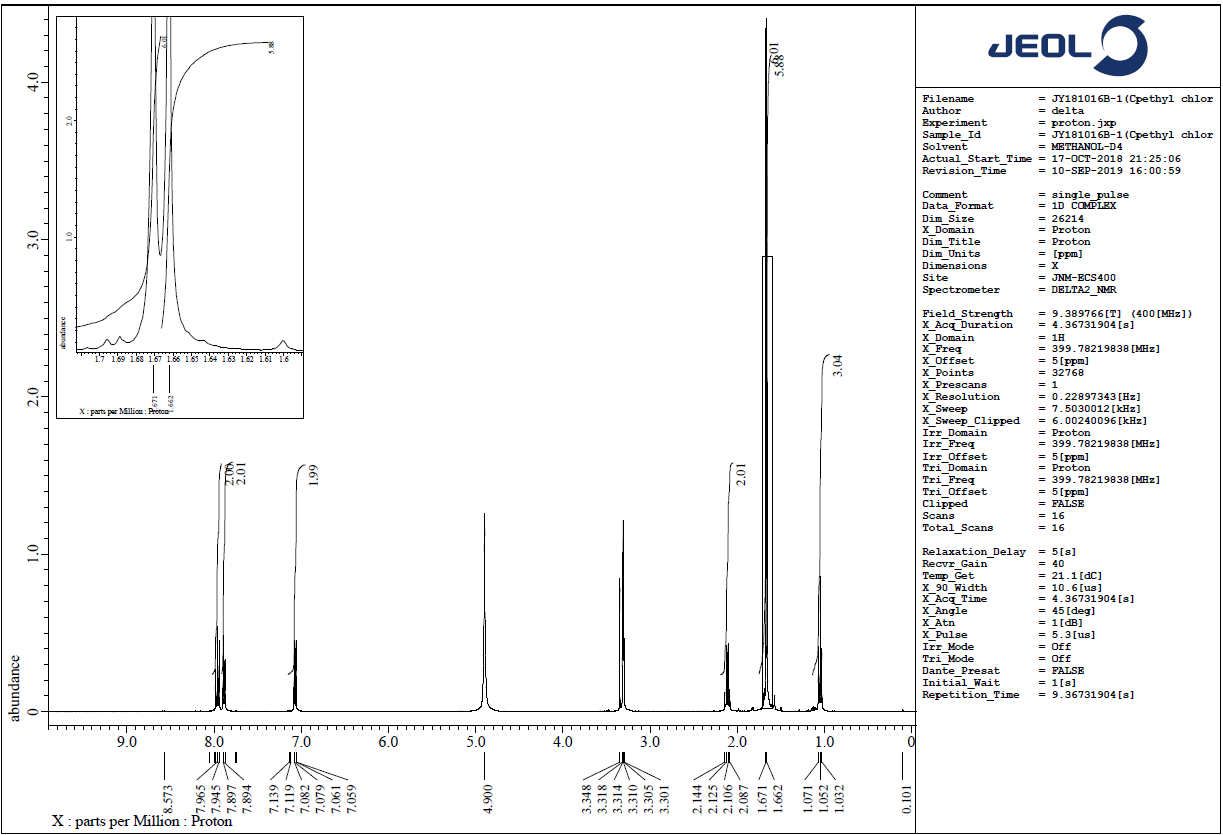


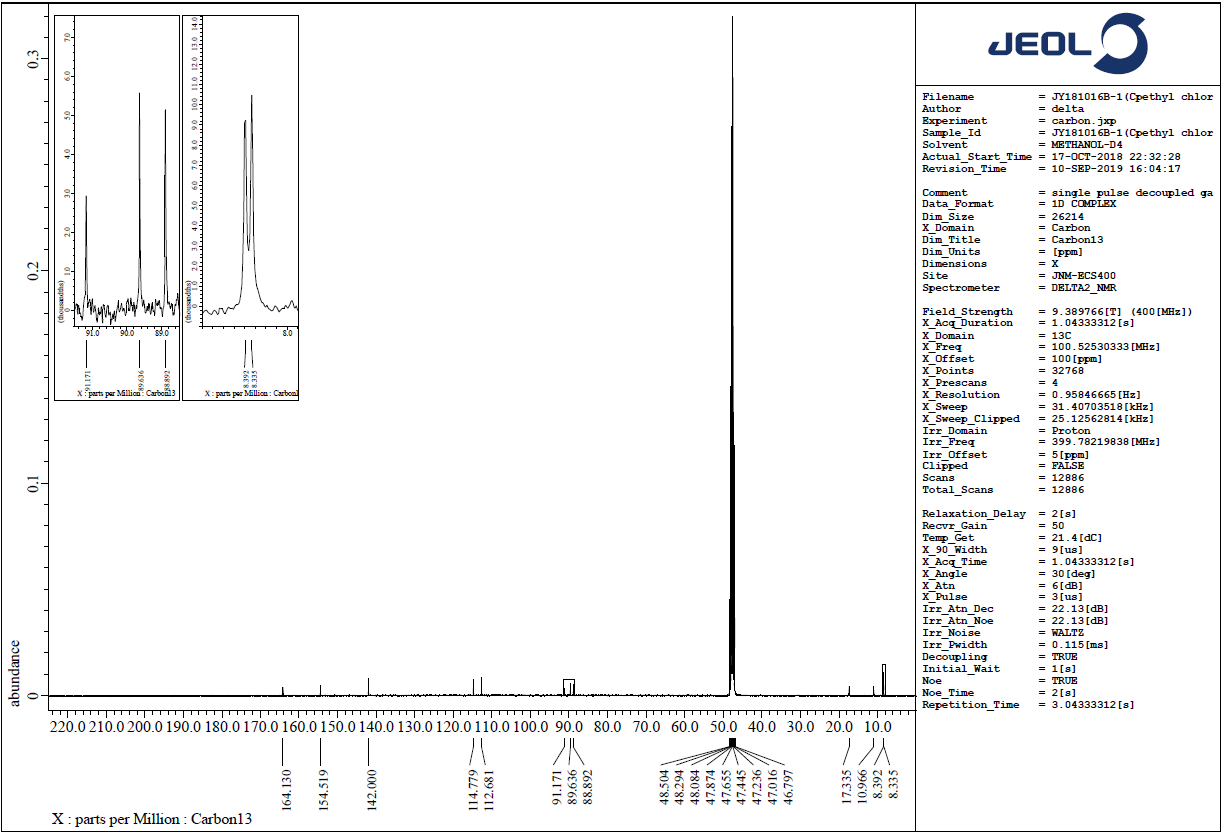


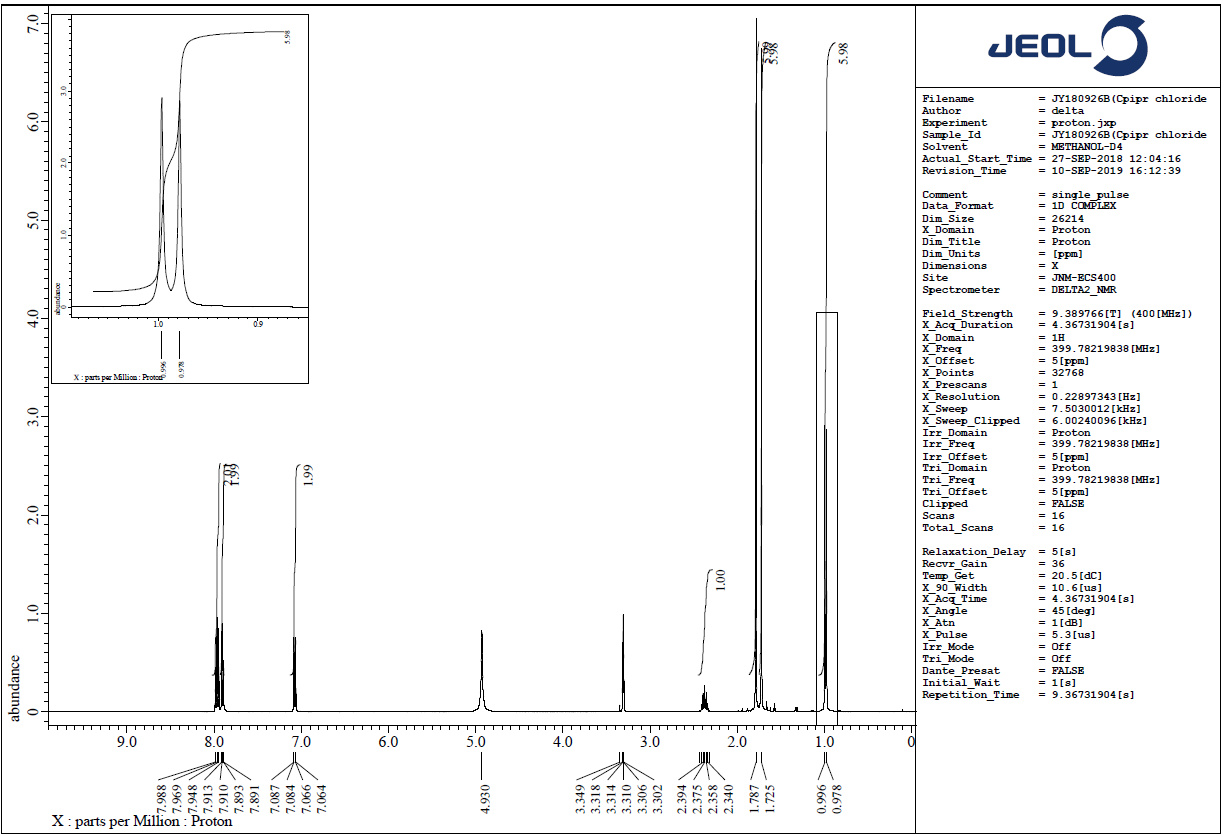


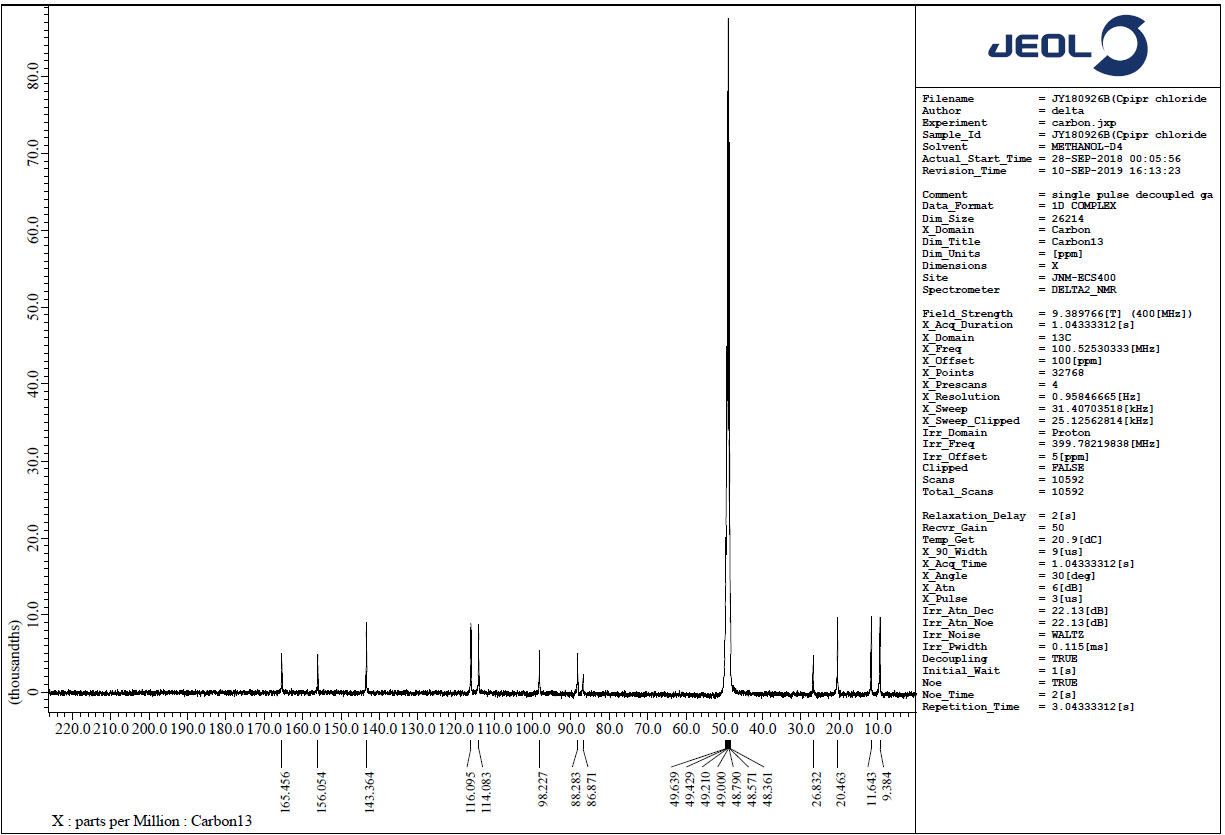


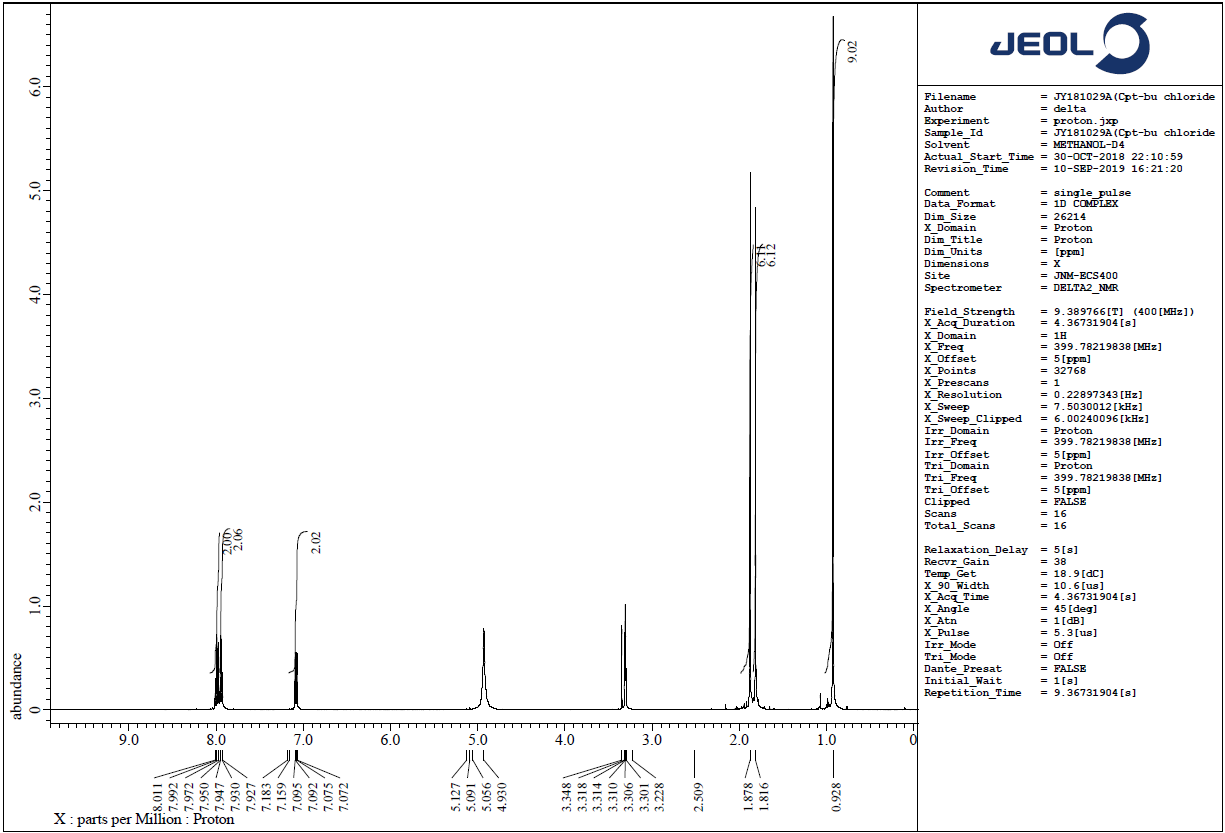


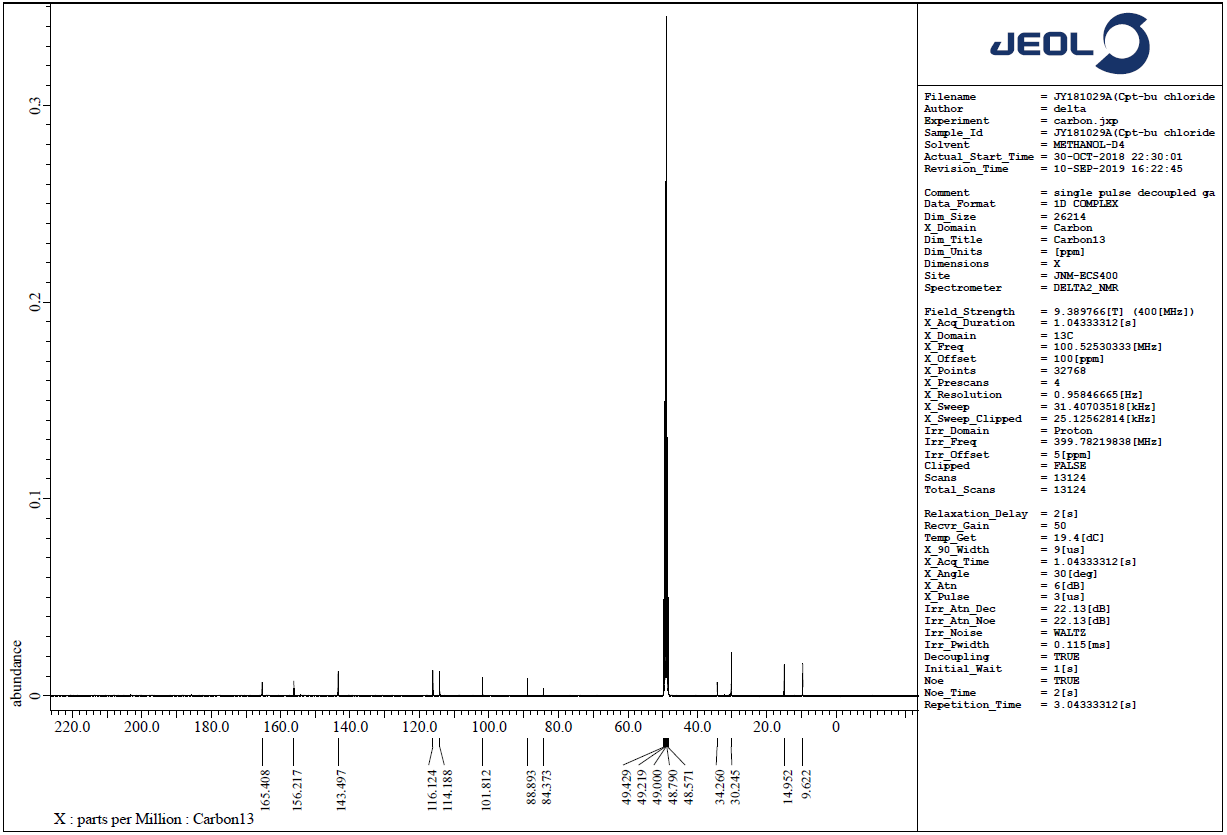


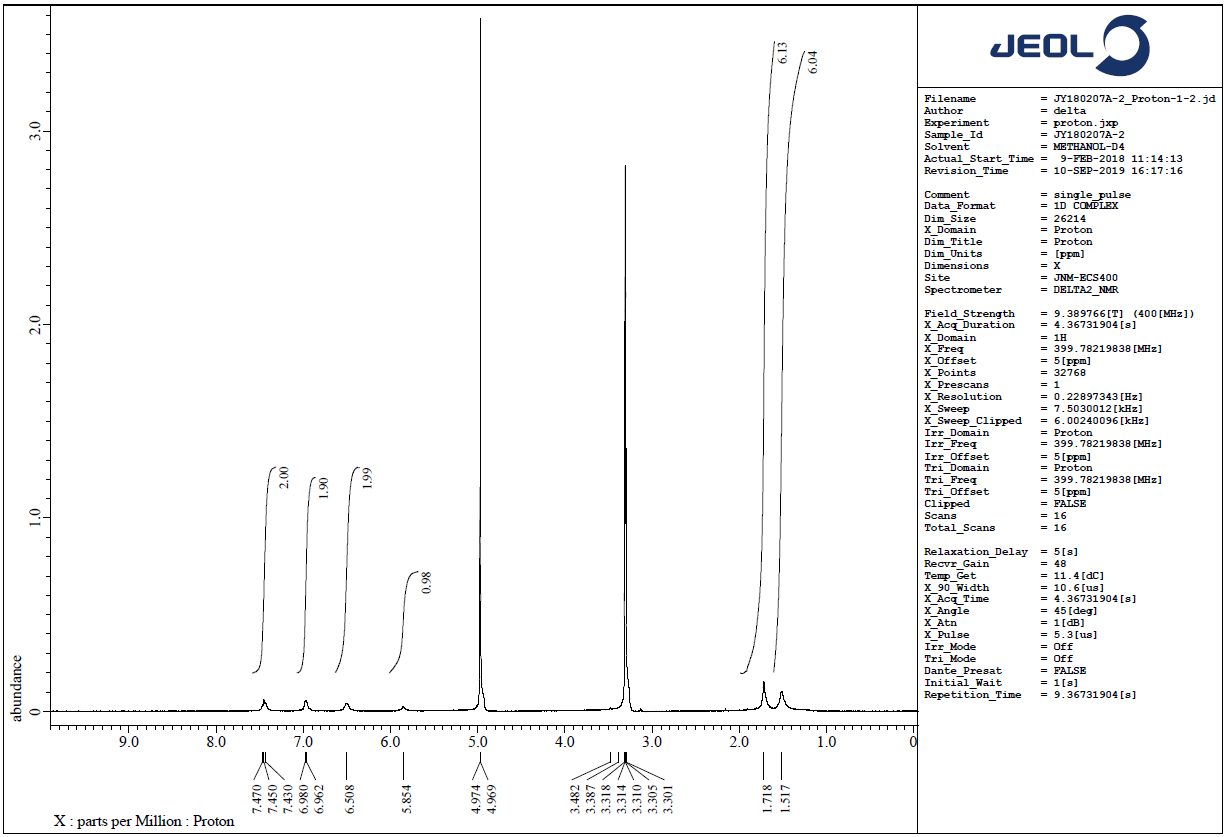


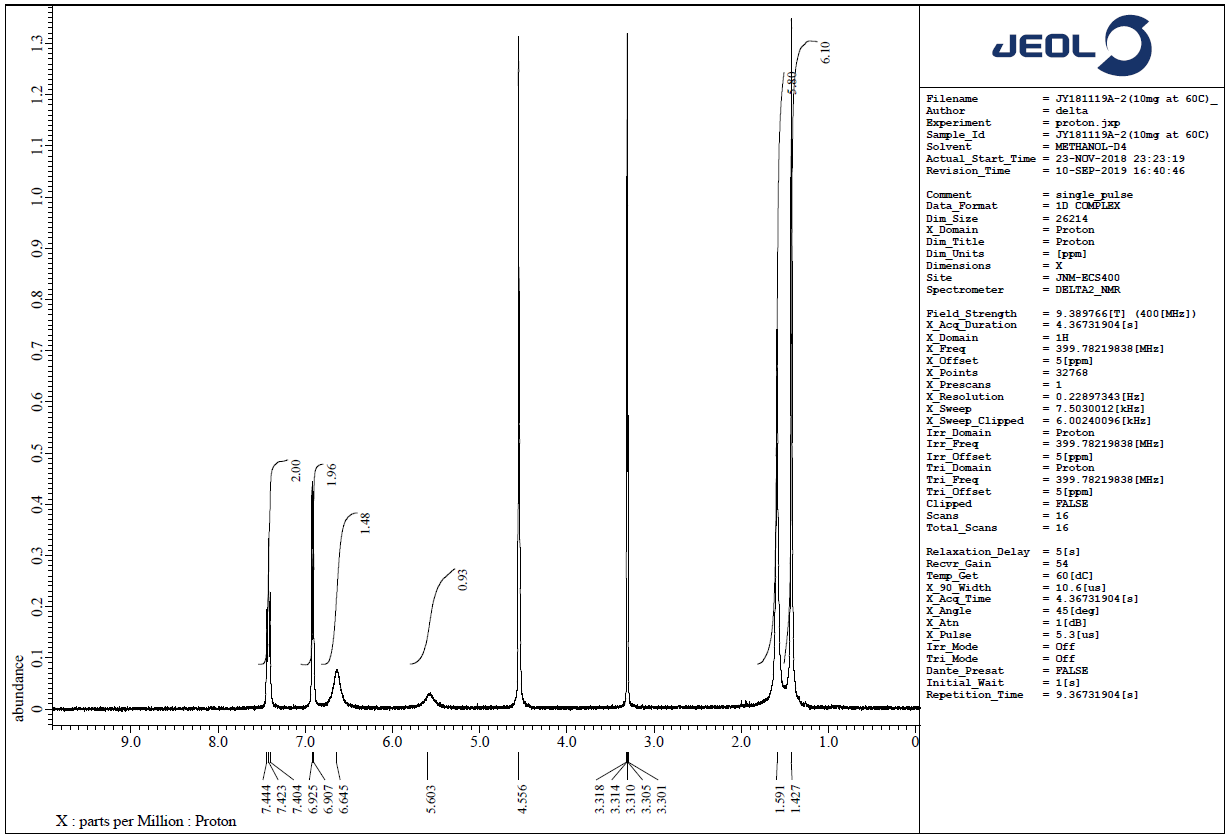


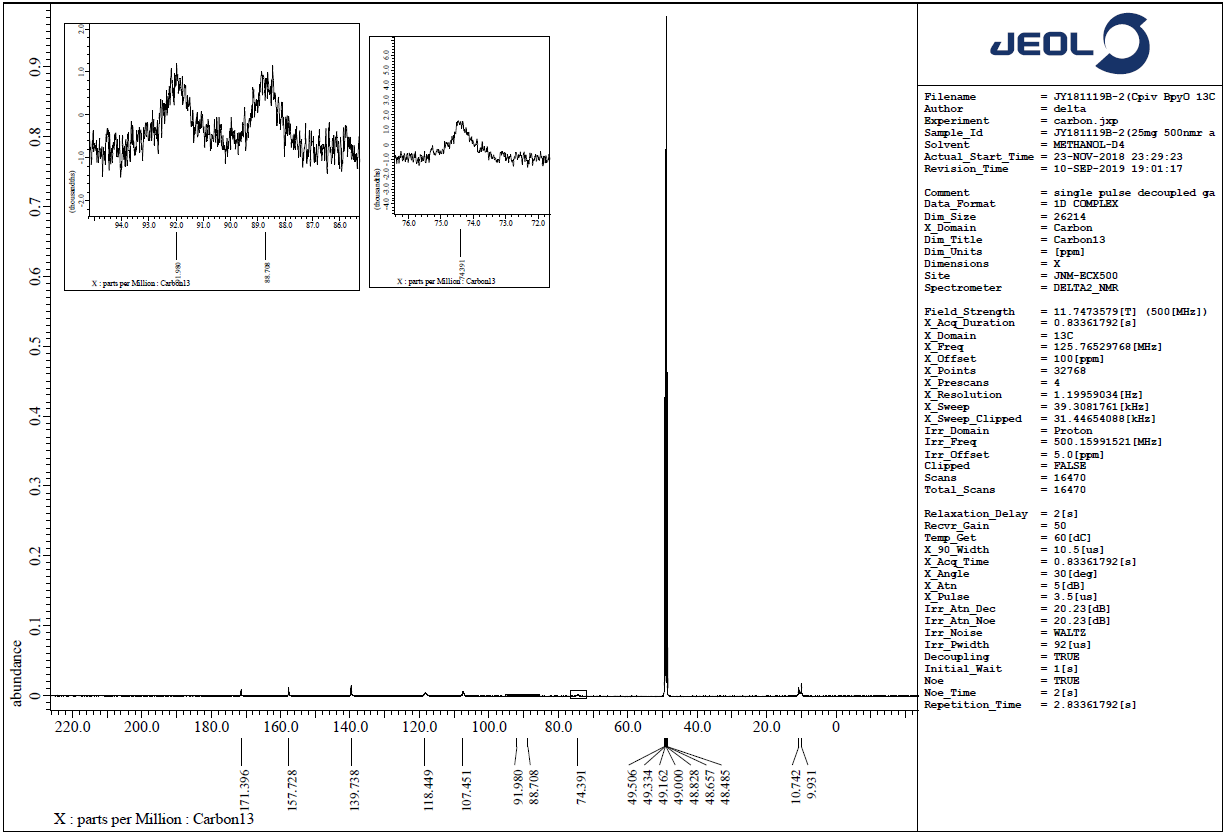


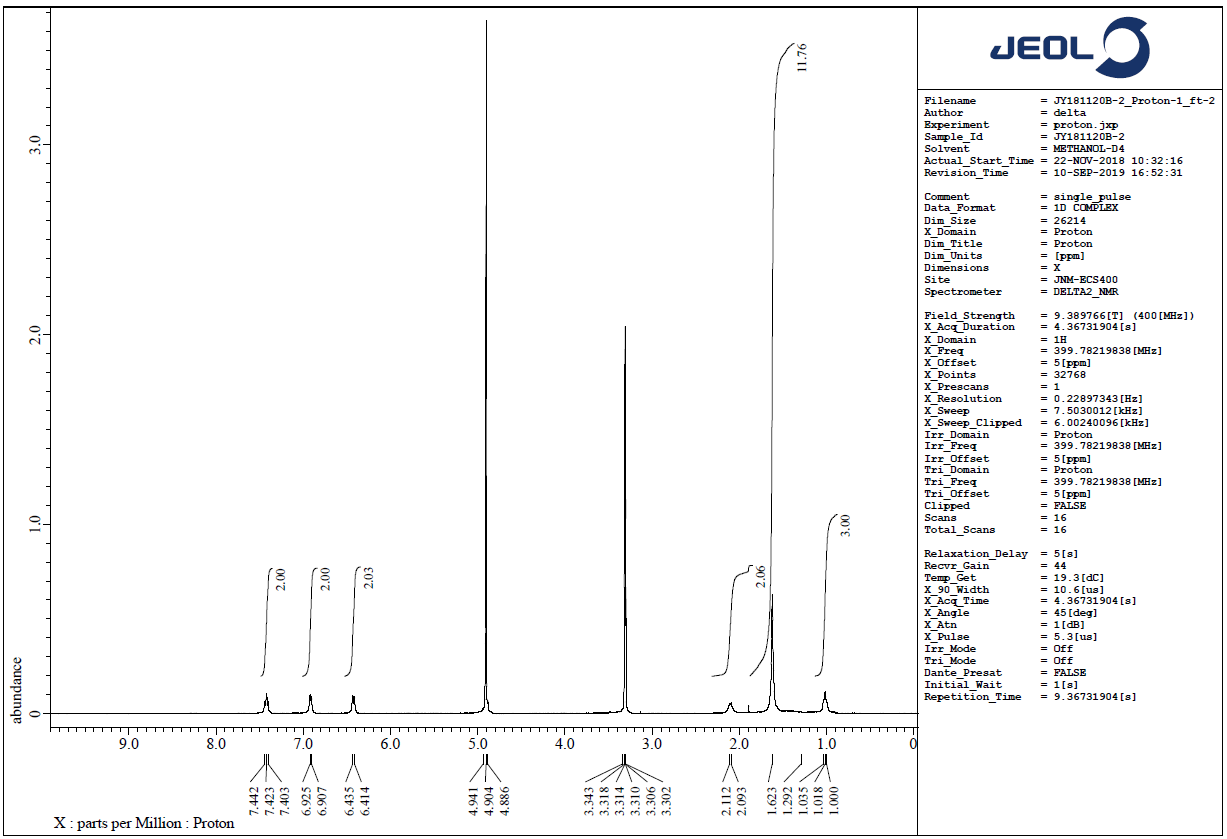


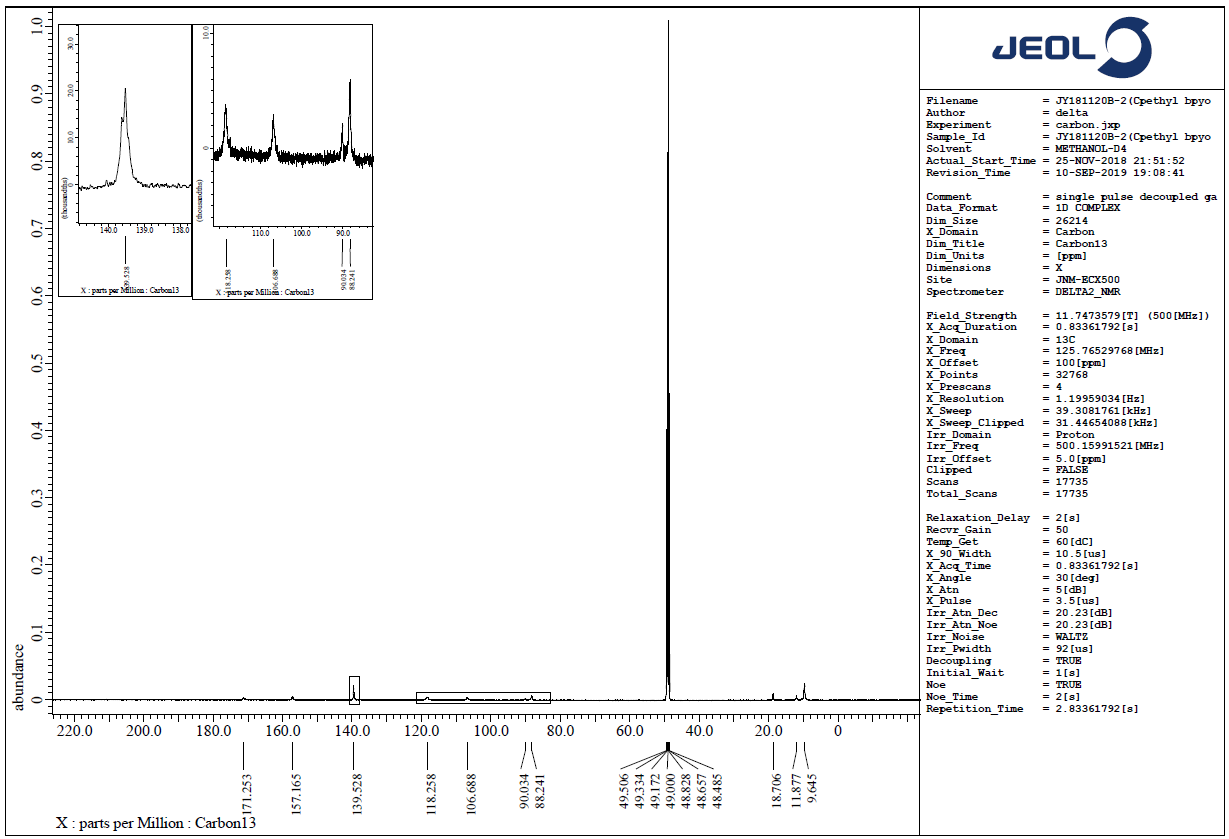


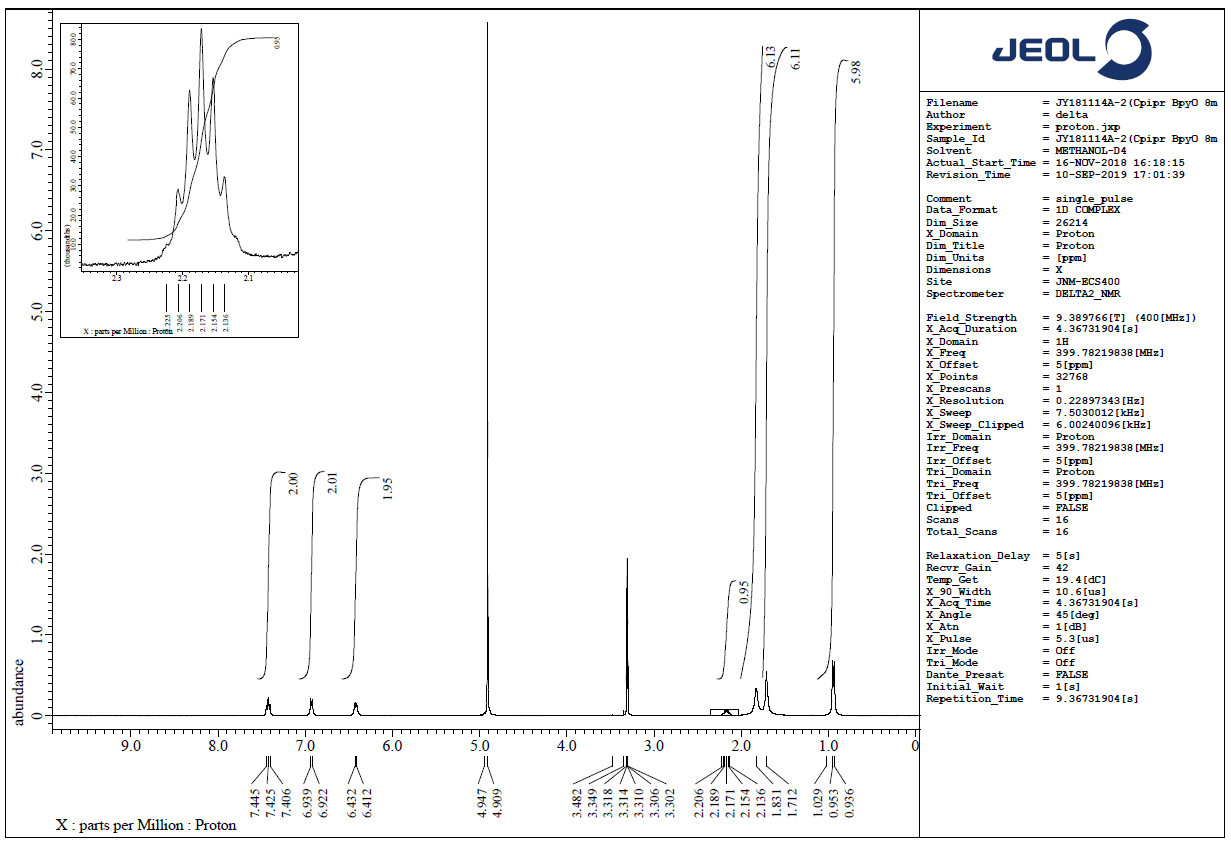


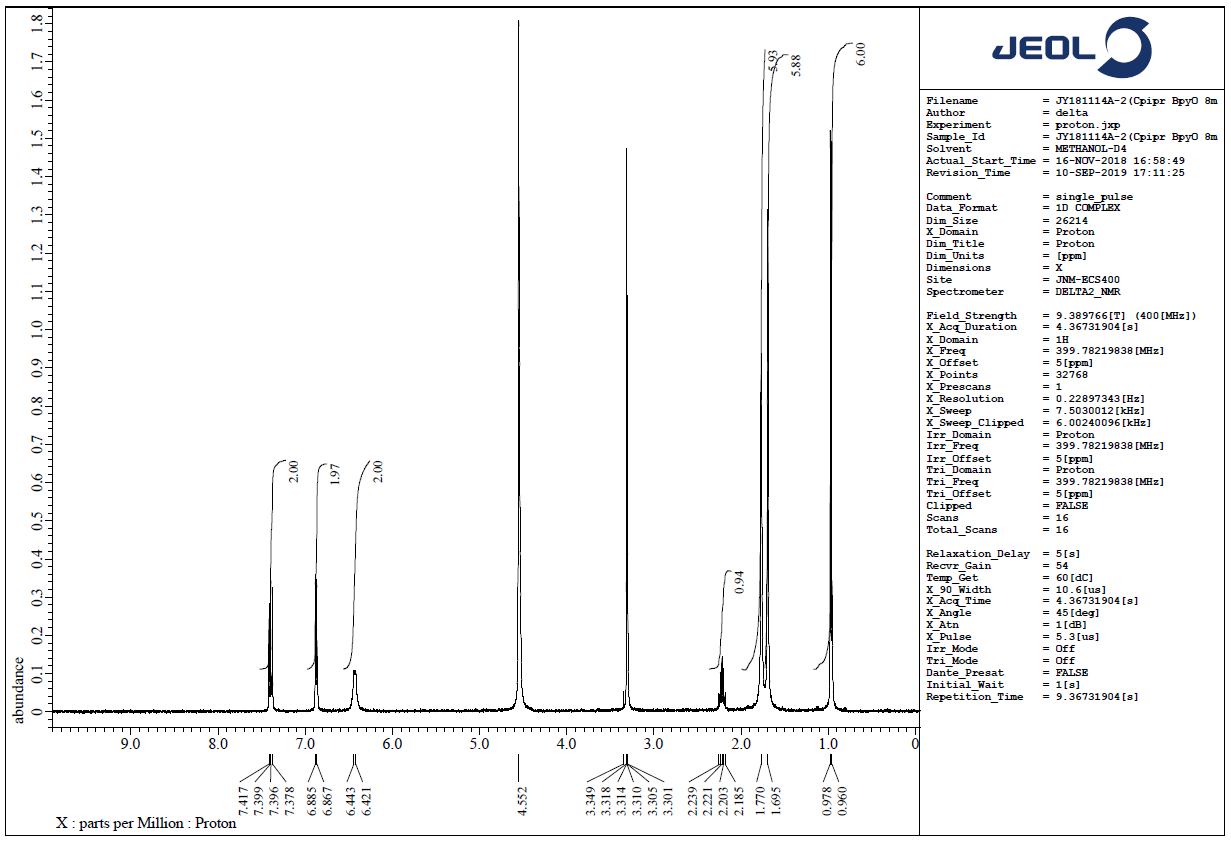


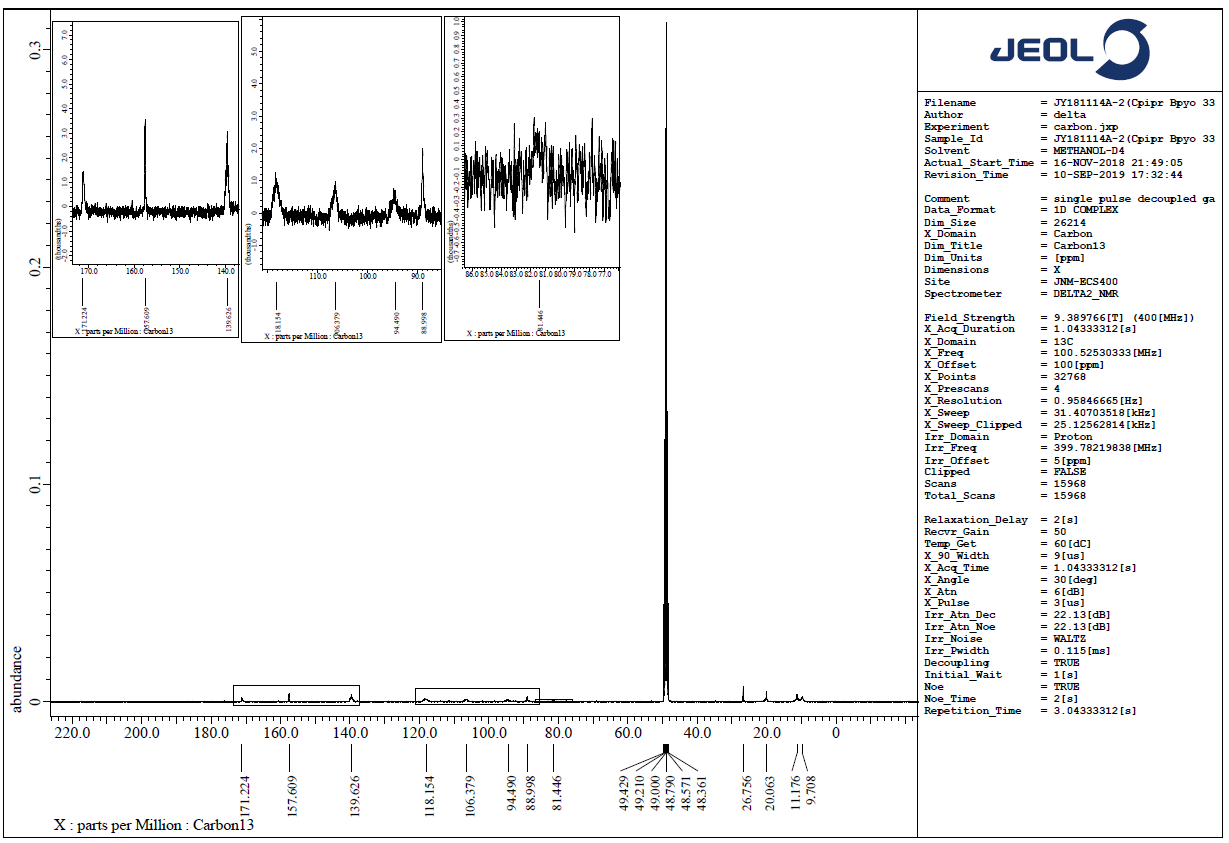


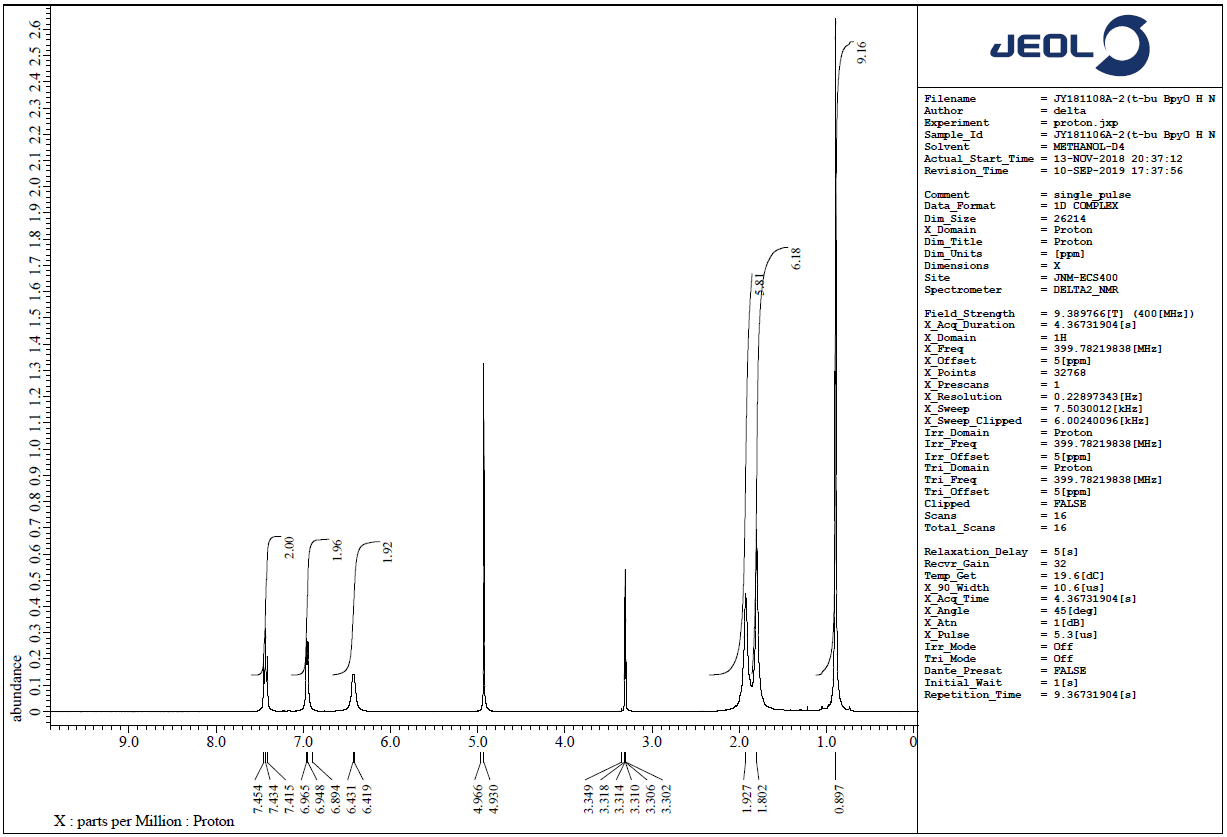


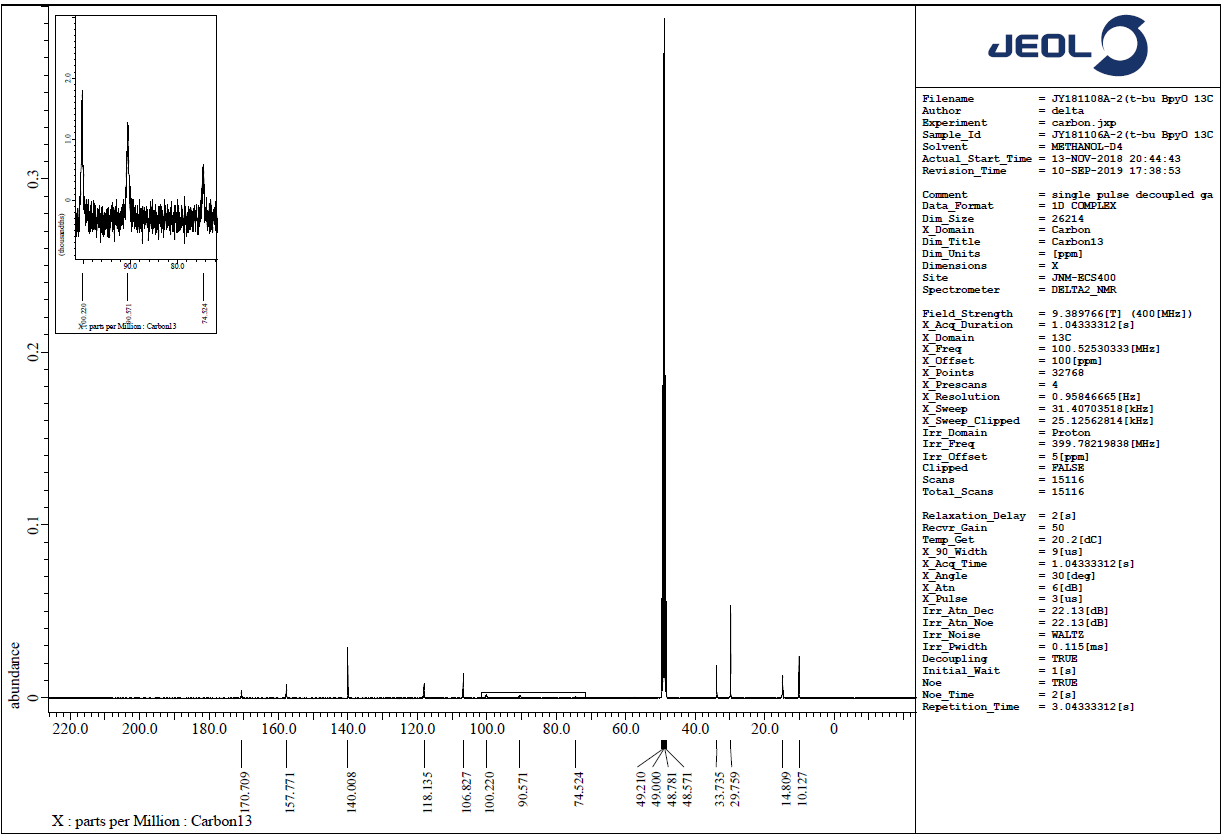


***11. References***

1. Brown. L. C.; Ressegue. E.; Merola. J. S. Rapid Access to Derivatized, Dimeric, Ring-Substituted Dichloro(cyclopentadienyl)rhodium(III) and Iridium(III) Complexes. *Organometallics*, **2016**, 35, 4014−4022.
2. Morris, D. M.; McGeagh, M.; Peña, D. D.; Merola, J. S. Extending the range of pentasubstituted cyclopentadienyl compounds: The synthesis of a series of tetramethyl(alkyl or aryl)cyclopentadienes (Cp**R*), their iridium complexes and their catalytic activity for asymmetric transfer hydrogenation. *Polyhedron* **2014**, *84*, 120-135.
3. du Plooy. K. E.; du Toit. J.; Levendis. D. C.; Coville. N. J.; Multiply substituted cyclopentadienyl metal complexes: I. Solid-state and solution conformational studies on (η5-C5Me4R)Fe( CO)(L) I(R = H, tBu). *Journal of Organometallic Chemistry*, **1996**, 231-242.
4. DePasquale, J.; Nieto, I.; Reuther, L. E.; Herbst-Gervasoni, C. J.; Paul, J. J.; Mochalin, V.; Zeller, M.; Thomas, C. M.; Addison, A. W.; Papish, E. T. Iridium Dihydroxybipyridine Complexes Show That Ligand Deprotonation Dramatically Speeds Rates of Catalytic Water Oxidation. *Inorg. Chem.* **2013**, *52*, 9175-9183.
5. Kawahara, R.; Fujita, K.; Yamaguchi, R. Cooperative Catalysis by Iridium Complexes with a Bipyridonate Ligand: Versatile Dehydrogenative Oxidation of Alcohols and Reversible Dehydrogenation–Hydrogenation between 2-Propanol and Acetone. *Angew. Chem. Int. Ed.* **2012**, *51*, 12790-12794.
6. Umemoto. T.; Nagayoshi. M.; Adachi. K.; Tomizawa. G. Synthesis, Properties, and Reactivity of N,N‘-Difluorobipyridinium and Related Salts and Their Applications as Reactive and Easy-To-Handle Electrophilic Fluorinating Agents with High Effective Fluorine Content. *J. Org. Chem.* **1998**, *63*, 3379.
7. Randles, M. D.; Simpson, P. V.; Gupta, V.; Fu, J.; Moxey, G. J.; Schwich, T.; Criddle, A. L.; Petrie, S.; MacLellan, J. G.; Batten, S. R.; Stranger, R.; Cifuentes, M. P.; Humphrey, M. G. Syntheses of Pentanuclear Group 6 Iridium Clusters by Core Expansion of Tetranuclear Clusters with Ir(CO)2(*η*5‐C5Me4R) (R = H, Me). *Inorg. Chem.* **2013**, *52*, 11256-11268.
