# Supplementary material
Source: MDPI journal article supplement (https://www.mdpi.com/2073-4344/9/10/846)
Supplement: s1 [file s1 › complex1e.cif]

#==============================================================================
data_complex1e

#==============================================================================
# CHEMICAL DATA

_chemical_formula_sum                             'C26 H42 Cl4 Ir2'
_chemical_formula_moiety                          'C26 H42 Cl4 Ir2'
_chemical_formula_weight                           880.87
_chemical_melting_point                            ?

#==============================================================================
# CRYSTAL DATA
_space_group_crystal_system                        triclinic
_space_group_name_H-M_alt                         'P -1'
_space_group_name_Hall                            '-P 1'
_space_group_IT_number                             2
loop_
_space_group_symop_id
_space_group_symop_operation_xyz
1   '+X,+Y,+Z'
2   '-X,-Y,-Z'
#------------------------------------------------------------------------------
_cell_length_a                                     8.3751(10)
_cell_length_b                                     9.2021(9)
_cell_length_c                                     9.6358(11)
_cell_angle_alpha                                  102.832(3)
_cell_angle_beta                                   99.083(4)
_cell_angle_gamma                                  100.880(3)
_cell_volume                                       695.41(13)
_cell_formula_units_Z                              1
_cell_measurement_reflns_used                      5891
_cell_measurement_theta_min                        3.00
_cell_measurement_theta_max                        27.47
_cell_measurement_temperature                      173
#------------------------------------------------------------------------------
_exptl_crystal_description                         block
_exptl_crystal_colour                              orange
_exptl_crystal_size_max                            0.200
_exptl_crystal_size_mid                            0.100
_exptl_crystal_size_min                            0.050
_exptl_crystal_density_diffrn                      2.103
_exptl_crystal_density_meas                        ?
_exptl_crystal_density_method                     'not measured'
_exptl_crystal_F_000                               420.00
_exptl_absorpt_coefficient_mu                      9.982
_exptl_absorpt_correction_type                     multi-scan
_exptl_absorpt_process_details                    'ABSCOR (Rigaku, 1995)'
_exptl_absorpt_correction_T_min                    0.279
_exptl_absorpt_correction_T_max                    0.607

#==============================================================================
# EXPERIMENTAL DATA

_diffrn_ambient_temperature                        173
_diffrn_radiation_type                            'Mo K\a'
_diffrn_radiation_wavelength                       0.71075
_diffrn_measurement_device_type                   'Rigaku R-AXIS RAPID'
_diffrn_measurement_method                         \w
_diffrn_detector_area_resol_mean                   10.000
_diffrn_reflns_number                              6650
_diffrn_reflns_av_R_equivalents                    0.0457
_diffrn_reflns_theta_max                           27.47
_diffrn_reflns_theta_min                           2.998
_diffrn_reflns_theta_full                          26.15
_diffrn_measured_fraction_theta_max                0.972
_diffrn_measured_fraction_theta_full               0.981
_diffrn_reflns_Laue_measured_fraction_max          ?
_diffrn_reflns_Laue_measured_fraction_full         ?
_diffrn_reflns_point_group_measured_fraction_max   ?
_diffrn_reflns_point_group_measured_fraction_full  ?
_diffrn_reflns_limit_h_min                        -10
_diffrn_reflns_limit_h_max                         10
_diffrn_reflns_limit_k_min                        -11
_diffrn_reflns_limit_k_max                         11
_diffrn_reflns_limit_l_min                        -12
_diffrn_reflns_limit_l_max                         12
_diffrn_standards_number                           0
_diffrn_standards_interval_count                   .
_diffrn_standards_decay_%                          ?
_reflns_number_total                               3092
_reflns_number_gt                                  3001
_reflns_threshold_expression                       F>2.0\s(F)

#==============================================================================
# REFINEMENT DATA

_refine_special_details
;
    Refinement was performed using all reflections. The weighted R-factor
(wR), goodness of fit (S) and R-factor (gt) are 
    based on F, with F set to zero for negative F. The threshold expression of
    F > 2.0 sigma(F) is used only for calculating R-factor (gt).
;
_refine_ls_structure_factor_coef                   F
_refine_ls_R_factor_all                            ?
_refine_ls_R_factor_gt                             0.0296
_refine_ls_wR_factor_ref                           0.0389
_refine_ls_wR_factor_gt                            ?
_refine_ls_number_restraints                       ?
_refine_ls_hydrogen_treatment                      constr
_refine_ls_number_reflns                           3092
_refine_ls_number_parameters                       166
_refine_ls_goodness_of_fit_ref                     1.003
_refine_ls_weighting_scheme                        calc
_refine_ls_weighting_details
                                        'w = 1/[0.0005Fo^2^ + 1.0000\s(Fo^2^)]'
_atom_sites_solution_hydrogens                     geom
_atom_sites_solution_primary                       direct
_atom_sites_solution_secondary                     difmap
_refine_ls_shift/su_max                            0.000
_refine_diff_density_max                           2.240
_refine_diff_density_min                          -2.180
_refine_ls_extinction_method                       none
_refine_ls_extinction_coef                         ?

loop_
_atom_type_symbol
_atom_type_description
_atom_type_scat_dispersion_real
_atom_type_scat_dispersion_imag
_atom_type_scat_source
  'C' 'C'  0.0033 0.0016 
;
International Tables for Crystallography
(Vol. C, Tables 4.2.6.8 and 6.1.1.4)
;
  'H' 'H'  0.0000 0.0000 
;
International Tables for Crystallography
(Vol. C, Table 6.1.1.4)
;
  'Cl' 'Cl'  0.1484 0.1585 
;
International Tables for Crystallography
(Vol. C, Tables 4.2.6.8 and 6.1.1.4)
;
  'Ir' 'Ir'  -1.4442 7.9887 
;
International Tables for Crystallography
(Vol. C, Tables 4.2.6.8 and 6.1.1.4)
;

#==============================================================================
# ATOMIC COORDINATES AND THERMAL PARAMETERS

loop_
_atom_site_label
_atom_site_type_symbol
_atom_site_fract_x
_atom_site_fract_y
_atom_site_fract_z
_atom_site_U_iso_or_equiv
_atom_site_adp_type
_atom_site_occupancy
_atom_site_site_symmetry_multiplicity
_atom_site_calc_flag
_atom_site_refinement_flags
_atom_site_disorder_assembly
_atom_site_disorder_group
 Ir1 Ir 0.68325(2) 0.099970(10) 0.15010(2) 0.01389(6) Uani 1 2 d . . .
 Cl1 Cl 0.38095(13) 0.02017(13) 0.11246(13) 0.0219(3) Uani 1 2 d . . .
 Cl2 Cl 0.69602(15) -0.14577(12) 0.18926(14) 0.0260(3) Uani 1 2 d . . .
 C1 C 0.7701(6) 0.2669(5) 0.3531(5) 0.0188(11) Uani 1 2 d . . .
 C2 C 0.6955(6) 0.3396(5) 0.2456(6) 0.0207(12) Uani 1 2 d . . .
 C3 C 0.7825(6) 0.3266(5) 0.1295(6) 0.0200(12) Uani 1 2 d . . .
 C4 C 0.9151(5) 0.2514(5) 0.1602(5) 0.0181(11) Uani 1 2 d . . .
 C5 C 0.9117(5) 0.2180(5) 0.3001(6) 0.0181(11) Uani 1 2 d . . .
 C6 C 0.7249(6) 0.2676(5) 0.5002(5) 0.0221(12) Uani 1 2 d . . .
 C7 C 0.7969(8) 0.4320(6) 0.5993(6) 0.0375(16) Uani 1 2 d . . .
 C8 C 0.5371(7) 0.2247(7) 0.4886(7) 0.0380(16) Uani 1 2 d . . .
 C9 C 0.7966(8) 0.1560(6) 0.5720(6) 0.0368(16) Uani 1 2 d . . .
 C10 C 0.5547(7) 0.4185(6) 0.2472(7) 0.0332(16) Uani 1 2 d . . .
 C11 C 0.7435(7) 0.3878(6) -0.0024(6) 0.0293(14) Uani 1 2 d . . .
 C12 C 1.0373(6) 0.2215(6) 0.0669(6) 0.0283(14) Uani 1 2 d . . .
 C13 C 1.0382(6) 0.1458(6) 0.3679(7) 0.0296(14) Uani 1 2 d . . .
 H1 H 0.91597 0.45502 0.6138 0.0407 Uiso 1 2 calc R . .
 H2 H 0.75477 0.50392 0.55393 0.0409 Uiso 1 2 calc R . .
 H3 H 0.76515 0.43915 0.6916 0.0409 Uiso 1 2 calc R . .
 H4 H 0.48635 0.29571 0.44848 0.0452 Uiso 1 2 calc R . .
 H5 H 0.49255 0.12306 0.42648 0.0452 Uiso 1 2 calc R . .
 H6 H 0.51418 0.22806 0.58363 0.0453 Uiso 1 2 calc R . .
 H7 H 0.7475 0.05265 0.51555 0.0448 Uiso 1 2 calc R . .
 H8 H 0.91459 0.17721 0.5781 0.0450 Uiso 1 2 calc R . .
 H9 H 0.77429 0.16843 0.66812 0.0450 Uiso 1 2 calc R . .
 H10 H 0.4676 0.36909 0.16296 0.0437 Uiso 1 2 calc R . .
 H11 H 0.51246 0.41331 0.33348 0.0437 Uiso 1 2 calc R . .
 H12 H 0.59372 0.52381 0.24829 0.0436 Uiso 1 2 calc R . .
 H13 H 0.62673 0.35228 -0.04431 0.0361 Uiso 1 2 calc R . .
 H14 H 0.77204 0.49781 0.02648 0.0362 Uiso 1 2 calc R . .
 H15 H 0.80573 0.35202 -0.0731 0.0363 Uiso 1 2 calc R . .
 H16 H 1.12606 0.31139 0.08872 0.0336 Uiso 1 2 calc R . .
 H17 H 1.08184 0.13689 0.08422 0.0337 Uiso 1 2 calc R . .
 H18 H 0.98231 0.19795 -0.03342 0.0337 Uiso 1 2 calc R . .
 H19 H 0.98273 0.0545 0.38903 0.0349 Uiso 1 2 calc R . .
 H20 H 1.10909 0.11996 0.3017 0.0351 Uiso 1 2 calc R . .
 H21 H 1.10386 0.21614 0.4564 0.0350 Uiso 1 2 calc R . .


loop_
_atom_site_aniso_label
_atom_site_aniso_U_11
_atom_site_aniso_U_22
_atom_site_aniso_U_33
_atom_site_aniso_U_12
_atom_site_aniso_U_13
_atom_site_aniso_U_23
 Ir1 0.01369(12) 0.01267(13) 0.01338(13) 0.00074(7) 0.00456(8) 0.00017(8)
 Cl1 0.0162(5) 0.0278(6) 0.0165(6) 0.0001(4) 0.0067(4) -0.0025(5)
 Cl2 0.0312(6) 0.0156(5) 0.0302(7) 0.0026(4) 0.0078(5) 0.0054(5)
 C1 0.021(2) 0.014(2) 0.020(3) -0.0001(16) 0.0063(19) 0.0028(18)
 C2 0.021(2) 0.016(2) 0.023(3) 0.0013(16) 0.0045(19) 0.0029(18)
 C3 0.024(2) 0.014(2) 0.020(3) -0.0019(16) 0.005(2) 0.0046(18)
 C4 0.012(2) 0.014(2) 0.024(3) -0.0060(14) 0.0055(18) 0.0050(18)
 C5 0.017(2) 0.012(2) 0.022(2) 0.0002(15) -0.0001(19) 0.0043(17)
 C6 0.026(2) 0.019(2) 0.018(3) 0.0000(17) 0.007(2) 0.0019(19)
 C7 0.056(4) 0.025(3) 0.021(3) -0.006(2) 0.010(3) -0.004(2)
 C8 0.033(3) 0.053(3) 0.027(3) 0.002(2) 0.016(3) 0.008(3)
 C9 0.053(4) 0.035(3) 0.025(3) 0.010(2) 0.010(3) 0.011(2)
 C10 0.032(3) 0.033(3) 0.044(4) 0.020(2) 0.012(3) 0.016(3)
 C11 0.037(3) 0.027(3) 0.026(3) 0.006(2) 0.010(2) 0.011(2)
 C12 0.029(3) 0.026(3) 0.030(3) 0.0022(19) 0.017(2) 0.001(2)
 C13 0.020(2) 0.031(3) 0.036(3) 0.0048(19) 0.002(2) 0.010(2)

#==============================================================================
_computing_data_collection                        'RAPID AUTO (Rigaku, ????)'
_computing_cell_refinement                        'RAPID AUTO'
_computing_data_reduction                         'RAPID AUTO'
_computing_structure_solution
                                               'SIR92 (Altomare, et al., 1994)'
_computing_structure_refinement
                                          'CRYSTALS (Carruthers, et al., 1999)'
_computing_publication_material
                                        'CrystalStructure 4.2.2 (Rigaku, 2016)'
_computing_molecular_graphics                     'CrystalStructure 4.2.2'

#==============================================================================
# MOLECULAR GEOMETRY

_geom_special_details
;
    ENTER SPECIAL DETAILS OF THE MOLECULAR GEOMETRY
;

loop_
_geom_bond_atom_site_label_1
_geom_bond_atom_site_label_2
_geom_bond_distance
_geom_bond_publ_flag
_geom_bond_site_symmetry_2
Ir1 Cl1 2.4435(11) yes .
Ir1 Cl1 2.4527(12) yes 2_655
Ir1 Cl2 2.3927(12) yes .
Ir1 C1 2.124(4) yes .
Ir1 C2 2.168(4) yes .
Ir1 C3 2.159(5) yes .
Ir1 C4 2.140(4) yes .
Ir1 C5 2.139(4) yes .
C1 C2 1.473(7) yes .
C1 C5 1.470(7) yes .
C1 C6 1.523(8) yes .
C2 C3 1.424(8) yes .
C2 C10 1.498(8) yes .
C3 C4 1.441(7) yes .
C3 C11 1.515(8) yes .
C4 C5 1.450(8) yes .
C4 C12 1.490(8) yes .
C5 C13 1.494(7) yes .
C6 C7 1.548(6) yes .
C6 C8 1.528(7) yes .
C6 C9 1.519(8) yes .
C7 H1 0.960 no .
C7 H2 0.960 no .
C7 H3 0.960 no .
C8 H4 0.960 no .
C8 H5 0.960 no .
C8 H6 0.960 no .
C9 H7 0.960 no .
C9 H8 0.960 no .
C9 H9 0.960 no .
C10 H10 0.960 no .
C10 H11 0.960 no .
C10 H12 0.960 no .
C11 H13 0.960 no .
C11 H14 0.960 no .
C11 H15 0.960 no .
C12 H16 0.960 no .
C12 H17 0.960 no .
C12 H18 0.960 no .
C13 H19 0.960 no .
C13 H20 0.960 no .
C13 H21 0.960 no .

loop_
_geom_angle_atom_site_label_1
_geom_angle_atom_site_label_2
_geom_angle_atom_site_label_3
_geom_angle
_geom_angle_publ_flag
_geom_angle_site_symmetry_1
_geom_angle_site_symmetry_3
Cl1 Ir1 Cl1 80.93(4) yes . 2_655
Cl1 Ir1 Cl2 87.81(4) yes . .
Cl1 Ir1 C1 107.71(13) yes . .
Cl1 Ir1 C2 94.81(13) yes . .
Cl1 Ir1 C3 116.43(14) yes . .
Cl1 Ir1 C4 155.58(13) yes . .
Cl1 Ir1 C5 146.76(14) yes . .
Cl1 Ir1 Cl2 88.27(4) yes 2_655 .
Cl1 Ir1 C1 161.19(14) yes 2_655 .
Cl1 Ir1 C2 124.23(15) yes 2_655 .
Cl1 Ir1 C3 94.61(14) yes 2_655 .
Cl1 Ir1 C4 97.60(14) yes 2_655 .
Cl1 Ir1 C5 132.21(14) yes 2_655 .
Cl2 Ir1 C1 108.37(14) yes . .
Cl2 Ir1 C2 147.43(15) yes . .
Cl2 Ir1 C3 155.75(14) yes . .
Cl2 Ir1 C4 116.58(13) yes . .
Cl2 Ir1 C5 94.66(13) yes . .
C1 Ir1 C2 40.13(19) yes . .
C1 Ir1 C3 66.61(19) yes . .
C1 Ir1 C4 67.48(19) yes . .
C1 Ir1 C5 40.34(18) yes . .
C2 Ir1 C3 38.4(2) yes . .
C2 Ir1 C4 65.69(18) yes . .
C2 Ir1 C5 66.17(17) yes . .
C3 Ir1 C4 39.17(19) yes . .
C3 Ir1 C5 65.78(18) yes . .
C4 Ir1 C5 39.6(2) yes . .
Ir1 Cl1 Ir1 99.07(5) yes . 2_655
Ir1 C1 C2 71.6(2) yes . .
Ir1 C1 C5 70.4(2) yes . .
Ir1 C1 C6 130.1(3) yes . .
C2 C1 C5 106.1(4) yes . .
C2 C1 C6 125.8(4) yes . .
C5 C1 C6 127.5(4) yes . .
Ir1 C2 C1 68.3(2) yes . .
Ir1 C2 C3 70.4(3) yes . .
Ir1 C2 C10 127.7(3) yes . .
C1 C2 C3 108.5(4) yes . .
C1 C2 C10 129.8(5) yes . .
C3 C2 C10 121.7(5) yes . .
Ir1 C3 C2 71.1(3) yes . .
Ir1 C3 C4 69.7(3) yes . .
Ir1 C3 C11 127.0(3) yes . .
C2 C3 C4 109.3(5) yes . .
C2 C3 C11 124.6(5) yes . .
C4 C3 C11 126.1(5) yes . .
Ir1 C4 C3 71.1(2) yes . .
Ir1 C4 C5 70.1(2) yes . .
Ir1 C4 C12 126.4(3) yes . .
C3 C4 C5 107.7(4) yes . .
C3 C4 C12 125.3(5) yes . .
C5 C4 C12 127.0(4) yes . .
Ir1 C5 C1 69.3(2) yes . .
Ir1 C5 C4 70.2(2) yes . .
Ir1 C5 C13 126.2(3) yes . .
C1 C5 C4 108.4(4) yes . .
C1 C5 C13 130.1(5) yes . .
C4 C5 C13 121.5(5) yes . .
C1 C6 C7 106.9(4) yes . .
C1 C6 C8 112.1(4) yes . .
C1 C6 C9 113.0(5) yes . .
C7 C6 C8 109.5(5) yes . .
C7 C6 C9 108.8(4) yes . .
C8 C6 C9 106.5(5) yes . .
C6 C7 H1 109.278 no . .
C6 C7 H2 109.600 no . .
C6 C7 H3 109.623 no . .
H1 C7 H2 109.439 no . .
H1 C7 H3 109.441 no . .
H2 C7 H3 109.446 no . .
C6 C8 H4 109.762 no . .
C6 C8 H5 109.356 no . .
C6 C8 H6 109.377 no . .
H4 C8 H5 109.442 no . .
H4 C8 H6 109.448 no . .
H5 C8 H6 109.443 no . .
C6 C9 H7 110.042 no . .
C6 C9 H8 108.913 no . .
C6 C9 H9 109.544 no . .
H7 C9 H8 109.441 no . .
H7 C9 H9 109.443 no . .
H8 C9 H9 109.442 no . .
C2 C10 H10 110.324 no . .
C2 C10 H11 108.459 no . .
C2 C10 H12 109.711 no . .
H10 C10 H11 109.443 no . .
H10 C10 H12 109.442 no . .
H11 C10 H12 109.443 no . .
C3 C11 H13 108.988 no . .
C3 C11 H14 109.617 no . .
C3 C11 H15 109.894 no . .
H13 C11 H14 109.444 no . .
H13 C11 H15 109.443 no . .
H14 C11 H15 109.440 no . .
C4 C12 H16 109.303 no . .
C4 C12 H17 110.265 no . .
C4 C12 H18 108.924 no . .
H16 C12 H17 109.445 no . .
H16 C12 H18 109.443 no . .
H17 C12 H18 109.446 no . .
C5 C13 H19 109.360 no . .
C5 C13 H20 109.496 no . .
C5 C13 H21 109.645 no . .
H19 C13 H20 109.446 no . .
H19 C13 H21 109.440 no . .
H20 C13 H21 109.441 no . .

#==============================================================================

#==============================================================================
# Additional structures and associated data_? identifiers
# should be added at this point if there is more than one 
# structure analysis in the CIF.

#==============================================================================
#     End of CIF
#==============================================================================
