# Supplementary material
Source: MDPI journal article supplement (https://www.mdpi.com/2073-4344/9/10/846)
Supplement: s1 [file s1 › complex2a.cif]

data_shelx
_audit_creation_date               2018-07-04
_audit_creation_method
;
Olex2 1.2
(compiled May 18 2018 14:05:52 for OlexSys, GUI svn.r5506)
;
_shelx_SHELXL_version_number       '2018/3'
_audit_contact_author_address      ?
_audit_contact_author_email        ?
_audit_contact_author_name         ''
_audit_contact_author_phone        ?
_publ_contact_author_id_orcid      ?
_publ_section_references
;
Dolomanov, O.V., Bourhis, L.J., Gildea, R.J, Howard, J.A.K. & Puschmann, H.
 (2009), J. Appl. Cryst. 42, 339-341.

Sheldrick, G.M. (2015). Acta Cryst. A71, 3-8.

Sheldrick, G.M. (2015). Acta Cryst. C71, 3-8.
;
_chemical_name_common              ?
_chemical_name_systematic          ?
_chemical_formula_moiety           'C19 H21 Cl Ir N2 O2, Cl, C H4 O'
_chemical_formula_sum              'C20 H25 Cl2 Ir N2 O3'
_chemical_formula_weight           604.52
_chemical_melting_point            ?
loop_
  _atom_type_symbol
  _atom_type_description
  _atom_type_scat_dispersion_real
  _atom_type_scat_dispersion_imag
  _atom_type_scat_source
 'Ir' 'Ir' -1.4442 7.9887
 'International Tables Vol C Tables 4.2.6.8 and 6.1.1.4'
 'Cl' 'Cl' 0.1484 0.1585 'International Tables Vol C Tables 4.2.6.8 and 6.1.1.4'
 'C' 'C' 0.0033 0.0016 'International Tables Vol C Tables 4.2.6.8 and 6.1.1.4'
 'N' 'N' 0.0061 0.0033 'International Tables Vol C Tables 4.2.6.8 and 6.1.1.4'
 'O' 'O' 0.0106 0.0060 'International Tables Vol C Tables 4.2.6.8 and 6.1.1.4'
 'H' 'H' 0.0000 0.0000 'International Tables Vol C Tables 4.2.6.8 and 6.1.1.4'

_shelx_space_group_comment
;
The symmetry employed for this shelxl refinement is uniquely defined
by the following loop, which should always be used as a source of
symmetry information in preference to the above space-group names.
They are only intended as comments.
;
_space_group_crystal_system        'orthorhombic'
_space_group_IT_number             61
_space_group_name_H-M_alt          'P b c a'
_space_group_name_Hall             '-P 2ac 2ab'
loop_
  _space_group_symop_operation_xyz
 'x, y, z'
 '-x+1/2, -y, z+1/2'
 '-x, y+1/2, -z+1/2'
 'x+1/2, -y+1/2, -z'
 '-x, -y, -z'
 'x-1/2, y, -z-1/2'
 'x, -y-1/2, z-1/2'
 '-x-1/2, y-1/2, z'

_cell_length_a                     16.891(2)
_cell_length_b                     14.4978(18)
_cell_length_c                     17.310(2)
_cell_angle_alpha                  90
_cell_angle_beta                   90
_cell_angle_gamma                  90
_cell_volume                       4238.8(9)
_cell_formula_units_Z              8
_cell_measurement_reflns_used      13138
_cell_measurement_temperature      173(2)
_cell_measurement_theta_max        27.5
_cell_measurement_theta_min        3.0
_shelx_estimated_absorpt_T_max     0.559
_shelx_estimated_absorpt_T_min     0.243
_exptl_absorpt_coefficient_mu      6.575
_exptl_absorpt_correction_T_max    1.000
_exptl_absorpt_correction_T_min    0.551
_exptl_absorpt_correction_type     'Multi-scan'
_exptl_absorpt_process_details     'REQAB (Rigaku, 1998)'
_exptl_absorpt_special_details     ?
_exptl_crystal_colour              yellow
_exptl_crystal_density_diffrn      1.895
_exptl_crystal_density_meas        ?
_exptl_crystal_density_method      ?
_exptl_crystal_description         platelet
_exptl_crystal_F_000               2352
_exptl_crystal_size_max            0.3
_exptl_crystal_size_mid            0.2
_exptl_crystal_size_min            0.1
_exptl_transmission_factor_max     ?
_exptl_transmission_factor_min     ?
_diffrn_reflns_av_R_equivalents    0.1455
_diffrn_reflns_av_unetI/netI       0.0682
_diffrn_reflns_Laue_measured_fraction_full  0.997
_diffrn_reflns_Laue_measured_fraction_max  0.998
_diffrn_reflns_limit_h_max         21
_diffrn_reflns_limit_h_min         -21
_diffrn_reflns_limit_k_max         18
_diffrn_reflns_limit_k_min         -16
_diffrn_reflns_limit_l_max         22
_diffrn_reflns_limit_l_min         -22
_diffrn_reflns_number              32707
_diffrn_reflns_point_group_measured_fraction_full  0.997
_diffrn_reflns_point_group_measured_fraction_max  0.998
_diffrn_reflns_theta_full          25.242
_diffrn_reflns_theta_max           27.485
_diffrn_reflns_theta_min           3.029
_diffrn_ambient_temperature        173.0
_diffrn_detector_area_resol_mean   ?
_diffrn_measured_fraction_theta_full  0.997
_diffrn_measured_fraction_theta_max  0.998
_diffrn_measurement_device_type    
;
Rigaku Saturn724+ (4x4 bin mode)
;
_diffrn_measurement_method         'profile data from \w-scans'
_diffrn_measurement_details
;
scan:
	Number of images: 360
	           Slice: -110.0000 - 70.0000
	     Image width: 0.5000
	        Exp time: 24.0000
	   Rotation axis: Omega
	           Omega: 0.0000
	             Chi: 45.0000
	             Phi: 0.0000
	             XTD: 44.9030
	          2theta: -20.0163
scan:
	Number of images: 360
	           Slice: -110.0000 - 70.0000
	     Image width: 0.5000
	        Exp time: 24.0000
	   Rotation axis: Omega
	           Omega: 0.0000
	             Chi: 45.0000
	             Phi: 90.0000
	             XTD: 44.9030
	          2theta: -20.0163

;

_diffrn_radiation_type             MoK\a
_diffrn_radiation_wavelength       0.71075
_diffrn_source                     ?
_reflns_Friedel_coverage           0.000
_reflns_Friedel_fraction_full      .
_reflns_Friedel_fraction_max       .
_reflns_number_gt                  4208
_reflns_number_total               4852
_reflns_special_details
;
 Reflections were merged by SHELXL according to the crystal
 class for the calculation of statistics and refinement.
 
 _reflns_Friedel_fraction is defined as the number of unique
 Friedel pairs measured divided by the number that would be
 possible theoretically, ignoring centric projections and
 systematic absences.
;
_reflns_threshold_expression       'I > 2\s(I)'
_computing_cell_refinement        
 'CrystalClear-SM Expert 2.0 r4 (Rigaku, 2009)'
_computing_data_collection        
 'CrystalClear-SM Expert 2.0 r4 (Rigaku, 2009)'
_computing_data_reduction         
 'CrystalClear-SM Expert 2.0 r4 (Rigaku, 2009)'
_computing_molecular_graphics      'Olex2 (Dolomanov et al., 2009)'
_computing_publication_material    'Olex2 (Dolomanov et al., 2009)'
_computing_structure_refinement    'ShelXL (Sheldrick, 2015)'
_computing_structure_solution      'ShelXT (Sheldrick, 2015)'
_refine_diff_density_max           2.371
_refine_diff_density_min           -4.090
_refine_diff_density_rms           0.357
_refine_ls_extinction_coef         .
_refine_ls_extinction_method       none
_refine_ls_goodness_of_fit_ref     1.033
_refine_ls_hydrogen_treatment      constr
_refine_ls_matrix_type             full
_refine_ls_number_parameters       261
_refine_ls_number_reflns           4852
_refine_ls_number_restraints       0
_refine_ls_R_factor_all            0.0450
_refine_ls_R_factor_gt             0.0416
_refine_ls_restrained_S_all        1.033
_refine_ls_shift/su_max            0.002
_refine_ls_shift/su_mean           0.000
_refine_ls_structure_factor_coef   Fsqd
_refine_ls_weighting_details      
 'w=1/[\s^2^(Fo^2^)+(0.0603P)^2^] where P=(Fo^2^+2Fc^2^)/3'
_refine_ls_weighting_scheme        calc
_refine_ls_wR_factor_gt            0.1070
_refine_ls_wR_factor_ref           0.1095
_refine_special_details            ?
_olex2_refinement_description
;
1. Fixed Uiso
 At 1.2 times of:
  All C(H) groups
 At 1.5 times of:
  All C(H,H,H) groups, All O(H) groups
2.a Aromatic/amide H refined with riding coordinates:
 C008(H008), C00J(H00J), C00K(H00K), C00N(H00N), C00O(H00O), C00P(H00P),
 C00Q(H00Q)
2.b Idealised Me refined as rotating group:
 C00H(H00A,H00B,H00C), C00L(H00D,H00E,H00F), C00M(H00G,H00H,H00I), C00R(H00L,
 H00M,H00R), C00S(HA,HB,HC)
2.c Idealised tetrahedral OH refined as rotating group:
 O004(H004), O005(H005), O6(H)
;
_atom_sites_solution_hydrogens     geom
_atom_sites_solution_primary       dual
_atom_sites_solution_secondary     ?
loop_
  _atom_site_label
  _atom_site_type_symbol
  _atom_site_fract_x
  _atom_site_fract_y
  _atom_site_fract_z
  _atom_site_U_iso_or_equiv
  _atom_site_adp_type
  _atom_site_occupancy
  _atom_site_site_symmetry_order
  _atom_site_calc_flag
  _atom_site_refinement_flags_posn
  _atom_site_refinement_flags_adp
  _atom_site_refinement_flags_occupancy
  _atom_site_disorder_assembly
  _atom_site_disorder_group
 Ir01 Ir 0.76196(2) 0.58876(2) 0.50828(2) 0.01394(10) Uani 1 1 d . . . . .
 Cl02 Cl 0.69542(7) 0.71618(8) 0.56893(7) 0.0227(3) Uani 1 1 d . . . . .
 Cl03 Cl 1.01405(7) 0.62597(9) 0.75346(6) 0.0250(3) Uani 1 1 d . . . . .
 O004 O 0.88583(19) 0.6404(2) 0.63730(18) 0.0237(7) Uani 1 1 d . . . . .
 H004 H 0.923321 0.638401 0.669141 0.036 Uiso 1 1 calc GR . . . .
 O005 O 0.6297(2) 0.6134(2) 0.3797(2) 0.0245(7) Uani 1 1 d . . . . .
 H005 H 0.598997 0.604545 0.342260 0.037 Uiso 1 1 calc GR . . . .
 N006 N 0.8606(2) 0.6750(3) 0.5128(2) 0.0143(8) Uani 1 1 d . . . . .
 N007 N 0.7534(2) 0.6658(3) 0.4053(3) 0.0176(9) Uani 1 1 d . . . . .
 C008 C 0.7068(3) 0.4622(3) 0.4708(3) 0.0215(10) Uani 1 1 d . . . . .
 H008 H 0.674336 0.456377 0.426250 0.026 Uiso 1 1 calc R . . . .
 C009 C 0.6795(3) 0.4833(3) 0.5455(3) 0.0209(10) Uani 1 1 d . . . . .
 O6 O 0.5307(2) 0.5731(2) 0.2733(3) 0.0305(9) Uani 1 1 d . . . . .
 H H 0.520014 0.516516 0.272834 0.046 Uiso 1 1 calc GR . . . .
 C00B C 0.7474(3) 0.4836(3) 0.5965(3) 0.0206(10) Uani 1 1 d . . . . .
 C00C C 0.8152(3) 0.4602(3) 0.5514(3) 0.0217(10) Uani 1 1 d . . . . .
 C00D C 0.8782(3) 0.7246(3) 0.4470(3) 0.0167(9) Uani 1 1 d . . . . .
 C00E C 0.9094(3) 0.6831(3) 0.5739(3) 0.0172(9) Uani 1 1 d . . . . .
 C00F C 0.8171(3) 0.7199(3) 0.3866(3) 0.0165(9) Uani 1 1 d . . . . .
 C00G C 0.7915(3) 0.4507(3) 0.4720(3) 0.0209(10) Uani 1 1 d . . . . .
 C00H C 0.7434(3) 0.4956(4) 0.6823(3) 0.0300(13) Uani 1 1 d . . . . .
 H00A H 0.795655 0.513471 0.701855 0.045 Uiso 1 1 calc GR . . . .
 H00B H 0.727212 0.437327 0.706322 0.045 Uiso 1 1 calc GR . . . .
 H00C H 0.704813 0.543713 0.694907 0.045 Uiso 1 1 calc GR . . . .
 C00I C 0.6920(3) 0.6633(3) 0.3562(3) 0.0179(9) Uani 1 1 d . . . . .
 C00J C 0.9468(3) 0.7756(3) 0.4405(3) 0.0217(10) Uani 1 1 d . . . . .
 H00J H 0.958566 0.807934 0.394153 0.026 Uiso 1 1 calc R . . . .
 C00K C 0.7588(3) 0.7620(4) 0.2672(3) 0.0237(11) Uani 1 1 d . . . . .
 H00K H 0.761178 0.793279 0.219008 0.028 Uiso 1 1 calc R . . . .
 C00L C 0.5955(3) 0.5001(4) 0.5678(3) 0.0316(12) Uani 1 1 d . . . . .
 H00D H 0.593399 0.547198 0.608341 0.047 Uiso 1 1 calc GR . . . .
 H00E H 0.572082 0.442694 0.587035 0.047 Uiso 1 1 calc GR . . . .
 H00F H 0.565737 0.521483 0.522578 0.047 Uiso 1 1 calc GR . . . .
 C00M C 0.8979(3) 0.4438(3) 0.5788(4) 0.0333(13) Uani 1 1 d . . . . .
 H00G H 0.934829 0.480125 0.547411 0.050 Uiso 1 1 calc GR . . . .
 H00H H 0.910730 0.378134 0.573822 0.050 Uiso 1 1 calc GR . . . .
 H00I H 0.902496 0.462366 0.633032 0.050 Uiso 1 1 calc GR . . . .
 C00N C 0.9986(3) 0.7788(4) 0.5030(3) 0.0225(11) Uani 1 1 d . . . . .
 H00N H 1.047002 0.811958 0.499143 0.027 Uiso 1 1 calc R . . . .
 C00O C 0.6926(3) 0.7103(3) 0.2864(3) 0.0222(10) Uani 1 1 d . . . . .
 H00O H 0.648499 0.707198 0.252445 0.027 Uiso 1 1 calc R . . . .
 C00P C 0.8213(3) 0.7676(3) 0.3185(3) 0.0221(10) Uani 1 1 d . . . . .
 H00P H 0.866482 0.803943 0.306659 0.026 Uiso 1 1 calc R . . . .
 C00Q C 0.9794(3) 0.7338(3) 0.5704(3) 0.0198(10) Uani 1 1 d . . . . .
 H00Q H 1.013427 0.737169 0.614020 0.024 Uiso 1 1 calc R . . . .
 C00R C 0.8432(4) 0.4223(4) 0.4055(4) 0.0353(14) Uani 1 1 d . . . . .
 H00L H 0.818944 0.442385 0.356931 0.053 Uiso 1 1 calc GR . . . .
 H00M H 0.848865 0.355007 0.405297 0.053 Uiso 1 1 calc GR . . . .
 H00R H 0.895439 0.450892 0.411015 0.053 Uiso 1 1 calc GR . . . .
 C00S C 0.4664(4) 0.6235(4) 0.2402(4) 0.0405(15) Uani 1 1 d . . . . .
 HA H 0.448577 0.592556 0.193031 0.061 Uiso 1 1 calc GR . . . .
 HB H 0.484029 0.686197 0.227666 0.061 Uiso 1 1 calc GR . . . .
 HC H 0.422666 0.626505 0.277291 0.061 Uiso 1 1 calc GR . . . .

loop_
  _atom_site_aniso_label
  _atom_site_aniso_U_11
  _atom_site_aniso_U_22
  _atom_site_aniso_U_33
  _atom_site_aniso_U_23
  _atom_site_aniso_U_13
  _atom_site_aniso_U_12
 Ir01 0.01751(15) 0.01181(14) 0.01250(13) -0.00010(6) -0.00080(6) -0.00079(6)
 Cl02 0.0279(6) 0.0190(5) 0.0214(6) -0.0037(4) 0.0004(5) 0.0051(4)
 Cl03 0.0319(6) 0.0215(6) 0.0216(6) 0.0008(4) -0.0045(5) 0.0028(5)
 O004 0.0284(17) 0.0262(18) 0.0164(17) 0.0036(14) -0.0053(14) -0.0065(14)
 O005 0.0274(18) 0.0281(18) 0.0182(17) 0.0030(15) -0.0049(14) -0.0042(15)
 N006 0.0180(19) 0.0097(17) 0.0150(19) 0.0012(14) 0.0002(14) 0.0001(15)
 N007 0.026(2) 0.015(2) 0.012(2) -0.0017(15) 0.0011(14) 0.0020(15)
 C008 0.028(2) 0.013(2) 0.024(2) -0.004(2) -0.007(2) -0.0057(19)
 C009 0.024(2) 0.011(2) 0.028(3) -0.0001(19) -0.001(2) -0.0071(18)
 O6 0.0341(19) 0.0203(18) 0.037(2) 0.0026(17) -0.0162(18) -0.0052(15)
 C00B 0.033(3) 0.013(2) 0.016(3) 0.004(2) -0.0039(19) -0.0041(18)
 C00C 0.029(2) 0.010(2) 0.027(3) 0.0016(19) -0.004(2) 0.0013(18)
 C00D 0.022(2) 0.013(2) 0.014(2) 0.0017(16) 0.0010(18) 0.0036(17)
 C00E 0.021(2) 0.012(2) 0.018(2) -0.0014(17) 0.0005(18) 0.0033(17)
 C00F 0.023(2) 0.014(2) 0.013(2) -0.0011(16) 0.0026(17) 0.0024(17)
 C00G 0.027(2) 0.010(2) 0.026(2) -0.005(2) -0.001(2) 0.0016(19)
 C00H 0.047(3) 0.027(3) 0.016(3) 0.003(2) 0.000(2) -0.004(2)
 C00I 0.021(2) 0.017(2) 0.016(2) -0.0040(17) -0.0002(18) 0.0025(17)
 C00J 0.026(2) 0.020(2) 0.020(2) 0.0045(18) 0.0046(19) -0.0048(19)
 C00K 0.034(3) 0.019(3) 0.017(3) 0.004(2) 0.000(2) 0.0022(19)
 C00L 0.030(3) 0.024(3) 0.041(3) 0.002(2) 0.005(2) -0.004(2)
 C00M 0.036(3) 0.016(2) 0.048(3) -0.002(2) -0.013(3) 0.006(2)
 C00N 0.019(2) 0.020(2) 0.029(3) -0.0005(18) 0.0029(18) -0.004(2)
 C00O 0.029(2) 0.021(2) 0.017(2) -0.0025(19) -0.0043(19) 0.0035(19)
 C00P 0.029(2) 0.021(2) 0.017(2) 0.0015(18) 0.0015(19) 0.0004(19)
 C00Q 0.022(2) 0.019(2) 0.018(2) -0.0017(18) -0.0053(18) -0.0006(18)
 C00R 0.045(3) 0.026(3) 0.035(3) -0.013(2) 0.003(3) 0.003(2)
 C00S 0.053(3) 0.030(3) 0.039(4) 0.003(3) -0.017(3) -0.001(3)

_geom_special_details
;
 All esds (except the esd in the dihedral angle between two l.s. planes)
 are estimated using the full covariance matrix.  The cell esds are taken
 into account individually in the estimation of esds in distances, angles
 and torsion angles; correlations between esds in cell parameters are only
 used when they are defined by crystal symmetry.  An approximate (isotropic)
 treatment of cell esds is used for estimating esds involving l.s. planes.
;
loop_
  _geom_bond_atom_site_label_1
  _geom_bond_atom_site_label_2
  _geom_bond_distance
  _geom_bond_site_symmetry_2
  _geom_bond_publ_flag
 Ir01 Cl02 2.4037(11) . ?
 Ir01 N006 2.085(4) . ?
 Ir01 N007 2.109(5) . ?
 Ir01 C008 2.158(5) . ?
 Ir01 C009 2.166(4) . ?
 Ir01 C00B 2.172(5) . ?
 Ir01 C00C 2.200(5) . ?
 Ir01 C00G 2.157(5) . ?
 O004 C00E 1.322(5) . ?
 O005 C00I 1.340(5) . ?
 N006 C00D 1.380(5) . ?
 N006 C00E 1.346(6) . ?
 N007 C00F 1.371(6) . ?
 N007 C00I 1.341(6) . ?
 C008 C009 1.407(7) . ?
 C008 C00G 1.440(7) . ?
 C009 C00B 1.447(7) . ?
 C009 C00L 1.490(7) . ?
 O6 C00S 1.428(7) . ?
 C00B C00C 1.427(7) . ?
 C00B C00H 1.497(7) . ?
 C00C C00G 1.439(7) . ?
 C00C C00M 1.494(7) . ?
 C00D C00F 1.471(6) . ?
 C00D C00J 1.380(6) . ?
 C00E C00Q 1.393(6) . ?
 C00F C00P 1.368(6) . ?
 C00G C00R 1.501(7) . ?
 C00I C00O 1.387(6) . ?
 C00J C00N 1.392(7) . ?
 C00K C00O 1.386(7) . ?
 C00K C00P 1.382(7) . ?
 C00N C00Q 1.376(6) . ?

loop_
  _geom_angle_atom_site_label_1
  _geom_angle_atom_site_label_2
  _geom_angle_atom_site_label_3
  _geom_angle
  _geom_angle_site_symmetry_1
  _geom_angle_site_symmetry_3
  _geom_angle_publ_flag
 N006 Ir01 Cl02 84.04(11) . . ?
 N006 Ir01 N007 76.68(14) . . ?
 N006 Ir01 C008 150.04(17) . . ?
 N006 Ir01 C009 157.82(17) . . ?
 N006 Ir01 C00B 119.03(16) . . ?
 N006 Ir01 C00C 99.70(16) . . ?
 N006 Ir01 C00G 112.50(17) . . ?
 N007 Ir01 Cl02 86.01(11) . . ?
 N007 Ir01 C008 99.56(18) . . ?
 N007 Ir01 C009 125.50(17) . . ?
 N007 Ir01 C00B 163.38(17) . . ?
 N007 Ir01 C00C 139.78(17) . . ?
 N007 Ir01 C00G 105.11(19) . . ?
 C008 Ir01 Cl02 125.68(14) . . ?
 C008 Ir01 C009 37.99(19) . . ?
 C008 Ir01 C00B 64.23(19) . . ?
 C008 Ir01 C00C 63.78(19) . . ?
 C009 Ir01 Cl02 96.42(13) . . ?
 C009 Ir01 C00B 38.96(18) . . ?
 C009 Ir01 C00C 64.16(18) . . ?
 C00B Ir01 Cl02 100.35(14) . . ?
 C00B Ir01 C00C 38.09(18) . . ?
 C00C Ir01 Cl02 133.94(14) . . ?
 C00G Ir01 Cl02 161.60(14) . . ?
 C00G Ir01 C008 39.00(19) . . ?
 C00G Ir01 C009 65.21(18) . . ?
 C00G Ir01 C00B 65.1(2) . . ?
 C00G Ir01 C00C 38.56(19) . . ?
 C00D N006 Ir01 116.9(3) . . ?
 C00E N006 Ir01 124.9(3) . . ?
 C00E N006 C00D 118.2(4) . . ?
 C00F N007 Ir01 116.6(3) . . ?
 C00I N007 Ir01 125.1(3) . . ?
 C00I N007 C00F 118.2(5) . . ?
 C009 C008 Ir01 71.3(3) . . ?
 C009 C008 C00G 109.8(4) . . ?
 C00G C008 Ir01 70.5(2) . . ?
 C008 C009 Ir01 70.7(3) . . ?
 C008 C009 C00B 107.5(4) . . ?
 C008 C009 C00L 125.9(5) . . ?
 C00B C009 Ir01 70.7(3) . . ?
 C00B C009 C00L 126.6(5) . . ?
 C00L C009 Ir01 125.0(3) . . ?
 C009 C00B Ir01 70.3(3) . . ?
 C009 C00B C00H 124.8(5) . . ?
 C00C C00B Ir01 72.0(3) . . ?
 C00C C00B C009 107.6(5) . . ?
 C00C C00B C00H 127.3(5) . . ?
 C00H C00B Ir01 128.4(4) . . ?
 C00B C00C Ir01 69.9(3) . . ?
 C00B C00C C00G 108.8(4) . . ?
 C00B C00C C00M 128.0(5) . . ?
 C00G C00C Ir01 69.1(3) . . ?
 C00G C00C C00M 123.2(5) . . ?
 C00M C00C Ir01 128.7(3) . . ?
 N006 C00D C00F 114.3(4) . . ?
 N006 C00D C00J 121.8(4) . . ?
 C00J C00D C00F 123.8(4) . . ?
 O004 C00E N006 115.3(4) . . ?
 O004 C00E C00Q 122.6(4) . . ?
 N006 C00E C00Q 122.1(4) . . ?
 N007 C00F C00D 114.2(4) . . ?
 C00P C00F N007 122.2(4) . . ?
 C00P C00F C00D 123.5(4) . . ?
 C008 C00G Ir01 70.5(2) . . ?
 C008 C00G C00R 126.7(4) . . ?
 C00C C00G Ir01 72.3(3) . . ?
 C00C C00G C008 106.2(4) . . ?
 C00C C00G C00R 126.7(5) . . ?
 C00R C00G Ir01 127.8(4) . . ?
 O005 C00I N007 115.4(4) . . ?
 O005 C00I C00O 122.4(4) . . ?
 N007 C00I C00O 122.2(4) . . ?
 C00D C00J C00N 118.9(4) . . ?
 C00P C00K C00O 119.6(5) . . ?
 C00Q C00N C00J 119.6(5) . . ?
 C00K C00O C00I 118.7(4) . . ?
 C00F C00P C00K 119.0(4) . . ?
 C00N C00Q C00E 119.2(4) . . ?

_shelx_res_file
;
TITL shelx_a.res in Pbca
    shelx.res
    created by SHELXL-2018/3 at 09:37:00 on 04-Jul-2018
REM Old TITL shelx in Pcab #61
REM SHELXT solution in Pbca: R1 0.067, Rweak 0.001, Alpha 0.051
REM <I/s> 0.623 for 490 systematic absences, Orientation a'=b, b'=a, c'=-c
REM Formula found by SHELXT: Ir Cl2 C21 N3 O
CELL 0.71075 16.8908 14.4978 17.3096 90 90 90
ZERR 8 0.0021 0.0018 0.0022 0 0 0
LATT 1
SYMM 0.5-X,-Y,0.5+Z
SYMM -X,0.5+Y,0.5-Z
SYMM 0.5+X,0.5-Y,-Z
SFAC Ir Cl C N O H
UNIT 8 16 160 16 24 200

L.S. 20
PLAN  20
SIZE 0.1 0.2 0.3
TEMP -100.15
BOND
list 4
fmap 2
ACTA
REM <olex2.extras>
REM <HklSrc "%./shelx.hkl">
REM </olex2.extras>

WGHT    0.060300
FVAR       0.15644
IR01  1    0.761959    0.588764    0.508281    11.00000    0.01751    0.01181 =
         0.01250   -0.00010   -0.00080   -0.00079
CL02  2    0.695421    0.716183    0.568935    11.00000    0.02786    0.01897 =
         0.02138   -0.00372    0.00036    0.00513
CL03  2    1.014046    0.625969    0.753459    11.00000    0.03185    0.02152 =
         0.02157    0.00084   -0.00453    0.00280
O004  5    0.885831    0.640387    0.637299    11.00000    0.02843    0.02617 =
         0.01643    0.00359   -0.00533   -0.00650
AFIX 147
H004  6    0.923321    0.638401    0.669141    11.00000   -1.50000
AFIX   0
O005  5    0.629717    0.613420    0.379692    11.00000    0.02738    0.02805 =
         0.01821    0.00299   -0.00494   -0.00418
AFIX 147
H005  6    0.598997    0.604545    0.342260    11.00000   -1.50000
AFIX   0
N006  4    0.860640    0.675045    0.512844    11.00000    0.01801    0.00974 =
         0.01503    0.00121    0.00016    0.00006
N007  4    0.753359    0.665752    0.405266    11.00000    0.02554    0.01538 =
         0.01200   -0.00170    0.00112    0.00199
C008  3    0.706841    0.462185    0.470775    11.00000    0.02781    0.01274 =
         0.02404   -0.00398   -0.00715   -0.00565
AFIX  43
H008  6    0.674336    0.456377    0.426250    11.00000   -1.20000
AFIX   0
C009  3    0.679491    0.483325    0.545502    11.00000    0.02381    0.01113 =
         0.02778   -0.00013   -0.00101   -0.00707

O6    5    0.530684    0.573104    0.273292    11.00000    0.03410    0.02027 =
         0.03713    0.00258   -0.01619   -0.00516
AFIX 147
H     6    0.520014    0.516516    0.272834    11.00000   -1.50000
AFIX   0

C00B  3    0.747373    0.483554    0.596474    11.00000    0.03315    0.01259 =
         0.01601    0.00388   -0.00394   -0.00413
C00C  3    0.815210    0.460234    0.551420    11.00000    0.02857    0.00985 =
         0.02680    0.00157   -0.00404    0.00128
C00D  3    0.878209    0.724574    0.446984    11.00000    0.02247    0.01347 =
         0.01418    0.00169    0.00100    0.00361
C00E  3    0.909447    0.683097    0.573907    11.00000    0.02144    0.01237 =
         0.01779   -0.00145    0.00048    0.00329
C00F  3    0.817059    0.719915    0.386601    11.00000    0.02261    0.01373 =
         0.01310   -0.00109    0.00263    0.00241
C00G  3    0.791531    0.450680    0.471957    11.00000    0.02715    0.00993 =
         0.02566   -0.00503   -0.00072    0.00164
C00H  3    0.743422    0.495552    0.682303    11.00000    0.04656    0.02707 =
         0.01638    0.00333    0.00014   -0.00351
AFIX 137
H00A  6    0.795655    0.513471    0.701855    11.00000   -1.50000
H00B  6    0.727212    0.437327    0.706322    11.00000   -1.50000
H00C  6    0.704813    0.543713    0.694907    11.00000   -1.50000
AFIX   0
C00I  3    0.691982    0.663303    0.356183    11.00000    0.02125    0.01697 =
         0.01557   -0.00404   -0.00016    0.00245
C00J  3    0.946846    0.775578    0.440488    11.00000    0.02559    0.01954 =
         0.01995    0.00449    0.00459   -0.00481
AFIX  43
H00J  6    0.958566    0.807934    0.394153    11.00000   -1.20000
AFIX   0
C00K  3    0.758789    0.761956    0.267158    11.00000    0.03436    0.01930 =
         0.01750    0.00351   -0.00007    0.00225
AFIX  43
H00K  6    0.761178    0.793279    0.219008    11.00000   -1.20000
AFIX   0
C00L  3    0.595486    0.500112    0.567770    11.00000    0.02973    0.02373 =
         0.04137    0.00205    0.00466   -0.00438
AFIX 137
H00D  6    0.593399    0.547198    0.608341    11.00000   -1.50000
H00E  6    0.572082    0.442694    0.587035    11.00000   -1.50000
H00F  6    0.565737    0.521483    0.522578    11.00000   -1.50000
AFIX   0
C00M  3    0.897936    0.443800    0.578775    11.00000    0.03633    0.01597 =
         0.04775   -0.00181   -0.01294    0.00620
AFIX 137
H00G  6    0.934829    0.480125    0.547411    11.00000   -1.50000
H00H  6    0.910730    0.378134    0.573822    11.00000   -1.50000
H00I  6    0.902496    0.462366    0.633032    11.00000   -1.50000
AFIX   0
C00N  3    0.998642    0.778819    0.503001    11.00000    0.01871    0.01962 =
         0.02913   -0.00055    0.00290   -0.00421
AFIX  43
H00N  6    1.047002    0.811958    0.499143    11.00000   -1.20000
AFIX   0
C00O  3    0.692602    0.710322    0.286404    11.00000    0.02876    0.02081 =
         0.01696   -0.00249   -0.00431    0.00353
AFIX  43
H00O  6    0.648499    0.707198    0.252445    11.00000   -1.20000
AFIX   0
C00P  3    0.821294    0.767572    0.318484    11.00000    0.02861    0.02072 =
         0.01686    0.00147    0.00150    0.00043
AFIX  43
H00P  6    0.866482    0.803943    0.306659    11.00000   -1.20000
AFIX   0
C00Q  3    0.979405    0.733758    0.570410    11.00000    0.02213    0.01911 =
         0.01815   -0.00174   -0.00533   -0.00060
AFIX  43
H00Q  6    1.013427    0.737169    0.614020    11.00000   -1.20000
AFIX   0
C00R  3    0.843175    0.422277    0.405538    11.00000    0.04483    0.02638 =
         0.03465   -0.01294    0.00347    0.00315
AFIX 137
H00L  6    0.818944    0.442385    0.356931    11.00000   -1.50000
H00M  6    0.848865    0.355007    0.405297    11.00000   -1.50000
H00R  6    0.895439    0.450892    0.411015    11.00000   -1.50000
AFIX   0

C00S  3    0.466450    0.623548    0.240226    11.00000    0.05277    0.02966 =
         0.03913    0.00313   -0.01677   -0.00104
AFIX 137
HA    6    0.448577    0.592556    0.193031    11.00000   -1.50000
HB    6    0.484029    0.686197    0.227666    11.00000   -1.50000
HC    6    0.422666    0.626505    0.277291    11.00000   -1.50000
AFIX   0
HKLF 4


REM  shelx_a.res in Pbca
REM wR2 = 0.1095, GooF = S = 1.033, Restrained GooF = 1.033 for all data
REM R1 = 0.0416 for 4208 Fo > 4sig(Fo) and 0.0450 for all 4852 data
REM 261 parameters refined using 0 restraints

END

WGHT      0.0603      0.0000

REM Highest difference peak  2.371,  deepest hole -4.090,  1-sigma level  0.357
Q1    1   0.8063  0.5885  0.5394  11.00000  0.05    2.37
Q2    1   0.8087  0.5875  0.4734  11.00000  0.05    2.23
Q3    1   0.7133  0.5893  0.4824  11.00000  0.05    2.08
Q4    1   0.7179  0.5882  0.5377  11.00000  0.05    1.97
Q5    1   0.7642  0.5874  0.4717  11.00000  0.05    1.31
Q6    1   0.8126  0.3985  0.3734  11.00000  0.05    0.87
Q7    1   0.7055  0.4634  0.5713  11.00000  0.05    0.86
Q8    1   0.8330  0.8619  0.3682  11.00000  0.05    0.84
Q9    1   0.8321  0.5373  0.5685  11.00000  0.05    0.80
Q10   1   0.6843  0.3724  0.6356  11.00000  0.05    0.76
Q11   1   0.8461  0.3420  0.5143  11.00000  0.05    0.76
Q12   1   0.8961  0.4038  0.5940  11.00000  0.05    0.73
Q13   1   0.8413  0.7334  0.4119  11.00000  0.05    0.72
Q14   1   0.8213  0.6491  0.5068  11.00000  0.05    0.72
Q15   1   0.9033  0.7814  0.4458  11.00000  0.05    0.70
Q16   1   0.8307  0.4581  0.3849  11.00000  0.05    0.69
Q17   1   0.6573  0.3576  0.6194  11.00000  0.05    0.68
Q18   1   0.6366  0.4837  0.5855  11.00000  0.05    0.67
Q19   1   0.8534  0.4251  0.5496  11.00000  0.05    0.66
Q20   1   0.8359  0.3807  0.6362  11.00000  0.05    0.65
;
_shelx_res_checksum                89329
_shelx_hkl_file
;
   0   0  -3    1.34    2.85
   0   0   3   -0.31    3.68
   0   0  -3    0.82    2.80
   0   0   3    3.33    4.11
   0   0  -4 6119.34  101.40
   0   0   4 5300.81   18.59
   0   0  -5    1.11    2.24
   0   0   5   -1.08    3.21
   0   0  -5    1.97    2.11
   0   0   5    0.60    1.66
   0   0  -6  356.17    9.47
   0   0   6  231.29    6.74
   0   0  -6  542.55   15.55
   0   0   6  543.53   12.30
   0   0  -7    2.91    3.21
   0   0   7    0.23    3.36
   0   0  -7    2.52    2.88
   0   0   7    2.09    4.56
   0   0  -8 3726.40   63.29
   0   0   8 2345.18   40.63
   0   0  -8 5719.71   95.06
   0   0 -10 1658.02   31.96
   0   0 -10 2443.91   43.30
   0   0 -11    1.04    4.12
   0   0 -11    0.80    6.01
   0   0 -14 1710.29   73.13
   0   0  14 2318.32   92.98
   0   0  15    0.51    8.90
   0   0 -16 2194.08  133.46
   0   0  16 2829.78  167.49
   0   0 -18  464.83   33.00
   0   0  18  541.17   47.45
   0   0 -19    2.64    5.46
   0   0  19    4.50    6.14
   0   0 -20  356.29   33.94
   0   0  20  392.91   36.04
   0   0 -21    1.95    4.79
   0   0  21    3.39    8.32
   0   0 -22   99.91   11.42
   0   0  22  107.45   26.04
   1   0  -3    7.81    4.98
  -1   0  -3    9.07    6.07
  -1   0   3    7.70    5.55
   1   0   3    8.05    5.94
   1   0   3    7.60    4.90
   1   0  -3    9.82    4.64
  -1   0   3   10.13    9.55
   1   0   3   13.51    6.61
   1   0  -4 1581.61   27.80
  -1   0  -4 1209.01   22.32
  -1   0   4 1083.24   19.40
   1   0   4 2279.63   39.29
   1   0  -4 2332.36   40.08
  -1   0   4 2315.16   39.85
   1   0   4 2375.05   41.07
   1   0  -5    2.38    2.70
  -1   0  -5    3.19    3.18
  -1   0   5    1.62    2.36
   1   0   5    1.52    2.72
   1   0   5    9.08    5.00
   1   0  -5    4.99    4.30
  -1   0   5    7.40    4.84
   1   0   5    6.44    5.16
   1   0  -6 1325.54   24.10
  -1   0  -6 1079.60   23.75
   1   0   6  820.82   16.86
   1   0   6 1894.74   33.83
   1   0  -6 1872.37   33.88
  -1   0   6 1829.89   32.67
   1   0   6 1851.71   33.43
   1   0  -7    1.86    2.90
  -1   0  -7    1.56    2.48
  -1   0   7    0.28    1.12
   1   0   7    0.58    1.97
   1   0  -7    6.52    4.22
   1   0   7    6.15    5.57
  -1   0   7    0.92    2.50
   1   0   7    1.50    3.07
   1   0  -8 1044.82   21.74
  -1   0  -8  919.76   19.18
   1   0   8  609.91   17.11
   1   0  -8 1490.13   28.41
  -1   0   8 1468.86   27.10
   1   0   8 1444.29   29.04
   1   0  -9    0.75    2.82
  -1   0  -9    2.77    4.19
  -1   0   9    0.45    0.97
   1   0  -9   -0.20    5.41
   1   0   9   -0.68    6.25
   1   0 -10   99.58   12.58
  -1   0 -10   80.04    8.91
  -1   0  10   38.69    3.80
   1   0 -10  129.54    9.02
   1   0  10  128.39    8.75
   1   0 -11   -0.53    4.20
  -1   0 -11    0.39    1.91
   1   0 -11   -0.11    5.22
   1   0  11    2.38    4.40
   1   0 -12  581.63   24.67
  -1   0 -12  494.80   21.21
   1   0 -12  706.30   29.44
   1   0  12  738.24   30.77
   1   0 -13    2.68    4.96
  -1   0 -13    1.67    2.35
   1   0 -13    1.07    3.43
   1   0  13    0.07    6.59
   1   0 -14  966.10   42.47
  -1   0 -14  853.19   41.46
   1   0 -14 1177.62   49.04
   1   0  14 1181.82   51.75
   1   0 -15   -0.02    5.63
   1   0  15    3.39    5.88
  -1   0 -16 1882.00  111.72
   1   0 -16 2050.02  124.65
   1   0  16 2510.26  150.29
  -1   0  16 2507.11  148.58
   1   0 -17    3.02   15.00
  -1   0 -17    3.68    4.35
  -1   0  17    4.90    5.05
   1   0 -18 1850.68  115.83
  -1   0 -18 1689.94  109.41
   1   0  18 2058.67  132.73
  -1   0  18 2075.27  133.60
  -1   0  19    9.76   18.72
   1   0 -20 1357.76   34.79
  -1   0 -20 1266.94   43.11
   1   0  20 1496.73  108.77
  -1   0  20 1545.63   30.56
   1   0 -21    4.77    6.36
  -1   0 -21    2.00    8.89
  -1   0 -22  922.70   74.62
   1   0 -22  980.79   79.73
   1   0  22 1093.53   80.85
  -1   0  22 1068.45   83.36
   2   0   2 5183.33   17.63
   2   0  -3    6.55    2.80
  -2   0   3    4.21    2.48
  -2   0  -3    4.11    4.72
   2   0   3    3.53    4.83
   2   0  -3    3.89    3.88
  -2   0   3    2.29    4.38
   2   0   3    6.67    5.97
  -2   0  -3    3.70    4.40
   2   0  -4 2516.98   42.11
   2   0   4 1415.42   25.46
   2   0  -4 3081.05   52.18
  -2   0   4 3115.06   52.77
   2   0   4 3034.08   51.96
  -2   0  -4 3092.08   52.69
   2   0  -5    0.85    2.48
  -2   0  -5    3.27    2.29
  -2   0   5   -0.06    1.77
   2   0   5   -2.62   10.68
   2   0   5   -0.43    3.22
   2   0  -5    2.32    3.88
  -2   0   5    2.61    3.26
   2   0   5    1.99    3.98
   2   0  -6 6984.85  115.73
  -2   0  -6 4888.12   83.22
   2   0  -6 9999.00  166.09
  -2   0   6 9692.41  160.68
   2   0   6 9726.77  162.95
   2   0  -7   -5.58   34.13
  -2   0  -7    0.66    2.14
   2   0   7   -0.42    3.98
   2   0   7    0.75    2.64
   2   0  -7    1.58    4.19
  -2   0   7    0.74    2.87
   2   0   7   -0.70    9.09
  -2   0  -8 1310.79   25.70
   2   0  -8 2261.55   43.35
   2   0   8 2264.89   41.08
   2   0  -9    0.25    2.16
  -2   0  -9    1.32    2.57
  -2   0   9   -0.72    2.33
   2   0  -9   -1.23    6.00
   2   0   9   -2.35    7.95
  -2   0 -10 3730.68   61.10
   2   0 -10 6279.34   98.88
   2   0  10 6208.09  100.49
   2   0 -11    1.04    2.82
   2   0  11   -2.63   21.72
   2   0 -12 1205.59   46.49
  -2   0 -12 1053.10   43.77
   2   0 -12 1608.72   62.47
   2   0  12 1611.89   62.23
   2   0 -13    0.13    4.47
  -2   0 -13    2.09    3.96
   2   0 -13    0.16    7.23
   2   0  13   -2.26   12.91
   2   0 -14 1658.43   69.90
  -2   0 -14 1388.36   57.31
   2   0 -14 1978.85   85.69
   2   0  14 1992.40   91.42
   2   0 -15    1.66    4.33
   2   0  15   17.43   28.43
   2   0 -16  434.94   50.70
  -2   0 -16  359.35   41.27
   2   0  16  522.89   61.85
   2   0 -17    3.10    7.06
  -2   0 -17    3.43    4.90
   2   0  17    3.84    8.51
  -2   0  17    3.96    5.43
   2   0 -18  741.94   50.82
  -2   0 -18  664.15   44.88
   2   0  18  886.69   65.34
  -2   0  18  839.30   65.14
   2   0 -19    2.77    7.18
  -2   0 -19    3.86    5.39
   2   0  19    1.11    3.61
  -2   0  19    4.48    8.77
   2   0 -20  179.26   21.91
  -2   0 -20  170.93   23.05
   2   0  20  195.74   35.18
  -2   0  20  182.48   23.56
   2   0 -21    1.46    3.46
  -2   0 -21    4.61    4.89
   2   0  21    6.10   11.27
  -2   0  21    1.88    8.12
  -2   0 -22  293.78   36.69
   2   0  22  360.77   44.24
  -2   0  22  345.93   49.32
  -3   0   0    3.49    2.63
   3   0   0    1.10    1.15
   3   0   0    3.26    3.48
  -3   0   0    1.51    1.50
  -3   0  -1    4.76    3.67
  -3   0   1    4.58    3.66
   3   0   1    7.56    5.96
   3   0  -1    8.61    4.58
   3   0  -1    6.09    3.23
  -3   0   1    5.09    2.83
   3   0   1    7.98    3.84
  -3   0  -1    8.09    5.78
  -3   0  -2   10.91    8.04
   3   0   2    5.33    6.58
  -3   0   2    6.00    2.59
   3   0  -2    3.56    1.55
   3   0  -2    7.45    4.07
  -3   0   2    5.76    3.42
   3   0   2   10.11    4.72
  -3   0  -2    6.51    3.55
  -3   0   3    2.03    1.18
  -3   0  -3    3.23    4.17
   3   0   3    2.87    4.90
  -3   0   3    5.19    2.35
   3   0  -3    2.69    4.02
  -3   0   3    2.10    2.89
   3   0   3   11.39    7.24
  -3   0  -3    5.74    3.54
   3   0  -4  105.26    3.18
  -3   0   4   64.62   17.74
  -3   0  -4   59.57    6.78
   3   0   4   60.19    4.78
   3   0  -4  122.81    5.90
  -3   0   4  125.92   12.43
   3   0   4  126.45    6.83
  -3   0  -4   98.39   10.53
   3   0  -5    4.83    3.35
  -3   0  -5    3.39    2.40
  -3   0   5    1.17    1.98
   3   0   5   -0.51    4.33
   3   0  -5    3.11    3.43
  -3   0   5    2.81    2.57
   3   0   5    3.21    4.91
  -3   0  -5    2.27    3.60
   3   0  -6  932.16   16.66
  -3   0  -6  553.03   16.17
  -3   0   6  506.69    9.75
   3   0   6  518.10   12.04
   3   0  -6 1108.45   21.02
  -3   0   6 1109.38   20.85
   3   0   6 1079.65   21.44
  -3   0  -6 1052.33   20.35
   3   0  -7    1.48    2.96
  -3   0  -7    2.57    3.48
  -3   0   7    0.45    1.20
   3   0   7    2.19    3.81
   3   0  -7    5.15    5.22
  -3   0   7    0.60    3.97
   3   0   7    1.31    3.50
   3   0  -8  651.20   13.81
  -3   0  -8  420.58   13.21
  -3   0   8  345.18    8.65
   3   0  -8  800.64   17.93
  -3   0   8  776.61   16.43
   3   0   8  771.10   18.10
   3   0  -9   -0.06    5.95
  -3   0  -9    0.42    3.69
  -3   0   9    0.97    1.21
   3   0  -9    1.01    1.80
   3   0   9   -0.27    8.96
   3   0 -10  604.54   15.10
  -3   0 -10  437.88   17.11
  -3   0  10  346.24    9.66
   3   0 -10  767.26   19.21
   3   0  10  710.03   21.33
   3   0 -11   -0.67    5.26
  -3   0 -11    0.72    2.74
  -3   0  11    0.32    1.12
   3   0 -11    3.56    5.21
   3   0  11   -2.53   15.82
   3   0 -12 1147.50   44.37
  -3   0 -12  826.42   33.88
   3   0 -12 1337.08   51.78
   3   0  12 1322.42   61.48
   3   0 -13    2.47    3.37
  -3   0 -13    4.99    4.14
   3   0 -13    2.44    4.74
   3   0  13   -3.52   11.64
   3   0 -14  707.01   30.90
  -3   0 -14  505.72   24.28
   3   0 -14  778.31   15.93
   3   0  14  771.34   36.96
   3   0 -15    2.61    2.87
  -3   0 -15    3.15    3.72
   3   0 -15    1.18    3.87
   3   0  15   -1.71    7.80
   3   0 -16  772.42   47.43
  -3   0 -16  610.67   38.27
   3   0 -16  894.66   54.09
   3   0  16  860.18   53.58
   3   0 -17    1.58    2.30
  -3   0 -17    2.14    3.58
   3   0 -17    2.06    4.54
   3   0  17   -1.05    8.46
   3   0 -18 1264.24   75.31
  -3   0 -18 1021.82   63.33
   3   0  18 1408.62   90.81
  -3   0  18 1389.55   82.22
   3   0 -19    4.29    8.86
   3   0  19    2.20    8.02
  -3   0  19    2.20    4.21
   3   0 -20 1338.62   29.32
  -3   0 -20 1131.23   90.84
   3   0  20 1495.06  113.80
  -3   0  20 1447.45  104.81
  -3   0 -21    3.21    6.82
   3   0  21    1.79   10.79
  -3   0 -22  900.82  107.45
   3   0  22 1123.56  128.08
  -3   0  22 1112.20  126.90
  -4   0   0 5932.42   18.73
  -4   0  -1    1.76    3.76
  -4   0   1    0.49    1.00
   4   0   1    1.00    1.65
   4   0  -1    1.38    1.71
   4   0  -1    3.47    4.09
  -4   0   1    2.08    2.44
   4   0   1    2.67    3.56
  -4   0  -1    1.23    4.51
  -4   0  -2 1248.65   24.06
  -4   0   2 1348.04   22.56
   4   0   2 1241.23   22.59
   4   0  -2 2060.39   34.21
   4   0  -2 2171.24   37.52
  -4   0   2 2101.41   36.36
  -4   0  -2 2053.57   35.90
  -4   0  -3    1.29    2.18
   4   0   3    0.22    6.38
   4   0  -3    1.72    2.93
  -4   0   3    2.91    2.45
   4   0   3    2.04    3.18
  -4   0  -3    0.30    2.69
  -4   0  -5    1.19    2.87
  -4   0   5    1.09    1.45
   4   0   5   -7.59    3.42
  -4   0   5    2.57    1.58
   4   0  -5    2.69    6.28
  -4   0   5    1.28    2.29
   4   0   5   -0.28    3.22
  -4   0  -5    1.79    2.13
   4   0  -6 2713.03   44.07
  -4   0  -6 1597.90   31.38
  -4   0   6 1474.84   24.48
   4   0  -6 3088.90   53.55
  -4   0   6 2991.86   50.42
   4   0   6 3203.32   54.65
   4   0  -7    0.75    1.84
  -4   0  -7    1.12    3.44
  -4   0   7   -0.04    1.61
   4   0  -7    0.95    3.55
  -4   0   7    1.54    2.87
   4   0   7   -0.01    6.09
  -4   0  -8 3193.76   53.32
  -4   0   8 3072.63   47.66
   4   0  -8 6145.80   96.05
   4   0   8 5906.01   93.38
   4   0  -9    0.69    1.10
  -4   0  -9   -0.58    6.08
  -4   0   9   -0.14    1.55
   4   0  -9   -1.05    5.16
   4   0   9    1.33    3.72
   4   0 -10 2751.08   53.22
  -4   0 -10 1748.44   37.47
  -4   0  10 1572.29   30.97
   4   0 -10 3166.96   64.96
   4   0  10 3084.19   63.71
   4   0 -11   -2.71    6.79
  -4   0 -11   -0.25    3.08
  -4   0  11    0.21    1.86
   4   0 -11    1.35    2.43
   4   0  11    0.90    4.41
  -4   0 -12 2653.19   27.12
   4   0 -12 4530.73   38.22
   4   0  12 4437.34   36.10
   4   0 -13   -1.88    8.13
  -4   0 -13    4.82    4.88
   4   0 -13   -0.10    4.26
   4   0  13   -6.32    9.45
   4   0 -14  779.21   35.38
  -4   0 -14  549.39   31.31
   4   0 -14  864.64   41.52
   4   0  14  845.24   37.80
   4   0 -15    0.01    2.94
  -4   0 -15    4.46    3.91
   4   0 -15   -4.55    6.85
   4   0  15   -2.30   11.31
   4   0 -16  995.94   59.79
  -4   0 -16  723.91   48.51
   4   0 -16 1123.79   66.92
   4   0  16 1070.47   64.34
   4   0 -17   -0.09    5.01
  -4   0 -17   -0.14    6.23
   4   0 -17   -0.38    6.62
   4   0  17    4.99    6.38
   4   0 -18  414.20   35.34
  -4   0 -18  301.95   39.68
   4   0 -18  424.48   52.81
   4   0  18  443.06   31.37
   4   0 -19   -0.85    4.50
  -4   0 -19    1.18    3.67
   4   0  19    5.81    9.74
  -4   0 -20  396.19   33.09
   4   0  20  530.12   42.68
  -4   0  20  502.96   52.85
  -4   0 -21    2.83    4.00
   4   0  21    3.71    6.06
  -4   0  21   -1.54    8.76
  -4   0 -22  109.71   21.52
   4   0  22  131.18   25.00
  -4   0  22  129.52   24.36
  -5   0   0    0.32    1.72
   5   0   0   -0.04    2.84
   5   0   0   -0.29    4.77
  -5   0   0   -0.86    4.43
  -5   0   1   -0.41    1.77
  -5   0  -1   -0.35    3.40
   5   0   1    0.01    2.87
   5   0  -1    1.40    2.35
   5   0  -1    7.97    6.68
  -5   0   1   -0.68    4.04
   5   0   1    1.96    2.85
  -5   0  -1    7.00    3.84
  -5   0  -2  254.87    8.63
  -5   0   2  286.91    5.93
   5   0   2  274.38    7.29
   5   0  -2  367.89    7.09
   5   0  -2  407.76    9.84
  -5   0   2  380.87    9.21
   5   0   2  399.76   11.17
  -5   0  -2  368.88   10.76
  -5   0  -3    0.75    3.02
  -5   0   3    0.84    0.88
   5   0   3    1.82    2.22
   5   0  -3    3.91    1.85
   5   0  -3    1.56    2.86
  -5   0   3    1.43    2.03
   5   0   3    2.20    2.18
  -5   0  -3    2.92    2.32
  -5   0  -4   39.31   35.10
   5   0   4   64.34    5.06
   5   0  -4  113.23   16.20
  -5   0   4  105.92   11.25
   5   0   4  111.64    6.74
  -5   0  -4   99.43    5.53
  -5   0  -5    2.68    2.92
  -5   0   5    0.82    0.92
   5   0   5    1.35    3.23
  -5   0   5    2.94    1.41
   5   0  -5    8.25    3.16
  -5   0   5    2.95    3.02
   5   0   5    3.38    2.65
  -5   0  -5    0.20    2.97
  -5   0  -6   21.16   18.68
  -5   0   6   37.99    3.85
  -5   0   6   66.67    5.21
   5   0  -6   64.72   13.57
  -5   0   6   61.41    8.35
   5   0   6   69.07   17.66
  -5   0  -7    1.82    3.03
  -5   0   7   -0.09    1.19
  -5   0   7    1.68    1.69
   5   0  -7   -0.36    5.35
  -5   0   7   -0.32    2.48
   5   0   7    1.58    4.88
  -5   0  -8  293.82   38.98
  -5   0   8  312.11   34.22
   5   0  -8  614.45   67.85
   5   0   8  568.84   64.01
   5   0  -9    2.45    1.67
  -5   0  -9   -3.83    5.30
  -5   0   9    0.34    1.19
   5   0  -9    1.32    3.89
   5   0   9   -0.34    6.09
   5   0 -10  397.89   30.02
  -5   0 -10  233.43   26.27
  -5   0  10  250.47   18.24
   5   0 -10  459.64   35.14
   5   0  10  451.48   34.02
   5   0 -11    0.64    1.21
  -5   0 -11   -0.62    5.80
  -5   0  11   -0.05    2.00
   5   0 -11   -0.34    5.62
   5   0  11   -1.12   12.38
   5   0 -12 1908.67   69.42
  -5   0 -12 1164.13   50.01
  -5   0  12 1124.33   40.62
   5   0 -12 1973.57   72.05
   5   0  12 1944.81   72.27
   5   0 -13   -1.23    5.84
  -5   0 -13   -1.20    5.90
  -5   0  13   -0.11    2.24
   5   0 -13    2.30    3.98
   5   0  13    0.54    4.78
   5   0 -14  801.88   45.99
  -5   0 -14  493.82   29.46
   5   0 -14  795.24   48.28
   5   0  14  809.00   49.06
   5   0 -15   -0.79    4.07
  -5   0 -15   -1.88    6.79
   5   0 -15   -0.02    6.52
   5   0  15   -2.28   10.83
   5   0 -16 1081.33   64.88
  -5   0 -16  754.51   61.37
   5   0 -16 1228.91   73.15
   5   0  16 1173.80   74.00
   5   0 -17   -0.29    5.18
  -5   0 -17    2.58    4.70
   5   0 -17    1.91    3.32
   5   0  17   -2.20   12.44
  -5   0 -18  765.32   48.09
   5   0 -18 1114.62   70.33
   5   0  18 1098.61   73.31
  -5   0 -19    3.07    4.51
   5   0 -19    2.58    3.25
   5   0  19   -3.81   10.33
  -5   0 -20  715.69   68.21
   5   0  20 1000.58   85.43
  -5   0 -21    0.76    6.28
   5   0  21   -0.87    9.52
  -5   0  21    2.56    6.50
  -6   0   0 1587.94   27.94
   6   0   0 1716.31   29.94
  -6   0   0 1654.10   29.87
  -6   0  -1   -1.39    3.18
  -6   0   1   -0.86    4.44
   6   0   1   -0.88    2.89
   6   0  -1    0.66    0.91
   6   0  -1    0.41    1.93
  -6   0   1    0.38    3.10
   6   0   1   -0.78    3.92
  -6   0  -1    0.97    2.10
  -6   0  -2 3710.55   63.47
  -6   0   2 3966.20   65.77
   6   0   2 3635.74   62.36
   6   0  -2 4325.44   71.58
   6   0  -2 4803.83   81.65
  -6   0   2 4501.97   76.15
   6   0   2 5114.30   87.70
  -6   0  -2 4564.71   77.29
  -6   0   3    0.01    0.42
  -6   0  -3   -1.11    4.20
   6   0   3    1.14    2.24
   6   0  -3    1.02    3.75
  -6   0   3    0.47    1.86
   6   0   3   -1.00    4.72
  -6   0  -3    0.48    3.17
  -6   0  -4 1249.26   23.81
   6   0   4 1259.08   23.45
   6   0  -4 2166.73   37.50
  -6   0   4 2035.08   34.99
   6   0   4 2177.04   38.48
  -6   0  -5    2.31    2.55
   6   0  -5    1.39    2.92
  -6   0   5    1.14    2.80
   6   0   5    2.73    5.89
  -6   0  -6 2278.63   39.13
   6   0  -6 4503.99   74.76
  -6   0   6 4447.09   69.77
   6   0   6 3920.46   64.44
  -6   0  -7   -1.25    5.07
  -6   0   7    0.18    0.60
  -6   0   7   -0.63    0.78
   6   0  -7    1.23    3.08
  -6   0   7   -0.26    3.95
   6   0   7   -0.22    6.39
  -6   0  -8 1160.20   23.92
  -6   0   8 1377.53   21.70
  -6   0   8 2250.24   34.63
   6   0  -8 2243.76   40.51
   6   0   8 2125.67   38.49
  -6   0  -9   -1.72    5.78
  -6   0   9    0.01    1.10
  -6   0   9   -0.02    1.58
   6   0  -9   -1.91    5.61
   6   0   9    1.82    4.41
  -6   0 -10 2160.12   85.74
  -6   0  10 2599.38   94.54
  -6   0  10 3666.43  133.09
   6   0 -10 4054.95  149.42
   6   0  10 3863.48  143.03
  -6   0 -11   -0.94    6.99
  -6   0  11   -0.05    1.75
  -6   0  11   -0.11    2.99
   6   0 -11    1.90    6.06
   6   0  11   -1.40   11.10
  -6   0 -12  939.41   37.24
  -6   0  12 1187.12   42.32
  -6   0  12 1761.43   62.30
   6   0 -12 1843.34   74.31
   6   0  12 1810.17   67.74
  -6   0 -13    2.40    5.95
  -6   0  13   -0.42    1.99
   6   0 -13    0.78    4.61
   6   0  13    0.81    3.93
  -6   0 -14  897.38   50.17
   6   0 -14 1573.66   91.91
   6   0  14 1607.45   87.11
  -6   0 -15   -0.84    6.26
   6   0 -15    2.24    3.20
   6   0  15   -0.34   12.71
  -6   0 -16  211.44   31.72
  -6   0  16  295.83   16.79
   6   0 -16  353.23   16.28
   6   0  16  359.82   25.26
  -6   0 -17    0.58    4.91
   6   0 -17   -1.68    7.43
   6   0  17   -3.85    9.38
  -6   0 -18  307.36   30.41
   6   0 -18  495.03   45.73
   6   0  18  492.73   40.56
  -6   0 -19   -0.86    7.75
   6   0 -19   -0.92    7.41
   6   0  19    4.62    8.00
  -6   0 -20   99.15   34.89
   6   0 -20  158.48   20.37
   6   0  20  157.02   21.59
  -6   0 -21    1.01    5.43
   6   0  21   -1.68    9.00
  -7   0   0    2.02    3.04
   7   0   0    1.10    2.12
   7   0   0    2.40    5.48
  -7   0   0    0.29    2.29
  -7   0   1    0.51    1.03
  -7   0  -1    1.07    1.44
   7   0   1   -0.29    2.72
   7   0  -1    0.61    1.56
   7   0  -1    1.07    4.74
   7   0   1    0.67    2.51
  -7   0   1    1.02    2.11
  -7   0  -1    6.22    4.55
  -7   0   2  393.69    9.13
   7   0   2  402.68   10.13
   7   0  -2  393.17    8.24
   7   0  -2  439.19   13.15
  -7   0   2  410.90   10.34
   7   0   2  434.40   20.37
  -7   0  -2  390.12   10.46
  -7   0  -3    0.89    2.79
  -7   0   3   -0.20    0.91
   7   0   3   -0.09    3.37
   7   0  -3   -1.33    5.67
   7   0  -3   -0.59    6.42
  -7   0   3   10.76    5.10
   7   0   3    4.20    7.58
  -7   0  -3    4.05    3.24
  -7   0  -4   62.11    8.16
   7   0  -4   91.19    6.80
   7   0  -4  101.18   12.67
  -7   0   4   81.03   10.04
   7   0   4   82.62    8.84
  -7   0  -5    1.29    2.72
   7   0  -5    0.44    2.58
  -7   0   5    5.25    4.44
   7   0   5   -0.32    5.84
  -7   0  -6   67.72    7.14
   7   0  -6  128.05    6.99
  -7   0   6  118.70   14.29
   7   0   6  117.12   15.47
  -7   0  -7   -0.78    5.28
   7   0  -7    1.28    2.72
   7   0   7    3.71    6.41
  -7   0  -8  233.07   19.78
   7   0  -8  392.23   29.18
   7   0   8  397.58   30.20
  -7   0  -9   -2.21    5.37
  -7   0   9    1.05    0.97
  -7   0   9    0.82    0.69
   7   0  -9    1.60    4.60
   7   0   9    4.38    7.40
  -7   0 -10  662.13   56.59
  -7   0  10  891.05   32.82
  -7   0  10 1231.69   45.13
   7   0 -10 1250.30   51.06
   7   0  10 1165.50   48.30
  -7   0 -11    1.50    4.29
  -7   0  11    0.59    1.14
  -7   0  11    0.20    1.10
   7   0 -11   -0.41    6.17
   7   0  11   -0.14    8.34
  -7   0 -12  687.28   37.44
  -7   0  12  944.47   37.24
  -7   0  12 1288.92   50.54
   7   0 -12 1295.52   55.95
   7   0  12 1267.38   53.74
  -7   0 -13   -2.11    7.41
  -7   0  13   -0.69    2.50
   7   0 -13   -1.24    6.68
   7   0  13    1.05    5.70
  -7   0 -14  735.96   46.29
  -7   0  14 1168.42   68.71
   7   0 -14 1309.47   82.19
   7   0  14 1264.38   79.29
  -7   0 -15    1.19    2.97
  -7   0  15    0.56    3.08
   7   0 -15    1.66    4.65
   7   0  15   -0.66   25.87
  -7   0 -16  734.23   51.88
   7   0 -16 1222.09   84.81
   7   0  16 1239.94   81.60
  -7   0 -17   -2.82    7.05
   7   0 -17    4.37    5.70
   7   0  17   -1.77   24.28
  -7   0 -18  531.42   41.94
   7   0 -18  860.59   69.18
   7   0  18  841.46   64.32
  -7   0 -19    3.10    4.94
   7   0 -19    3.16    3.26
   7   0  19   -0.28    9.88
  -7   0 -20  387.35   43.15
   7   0 -20  627.65   64.44
   7   0  20  600.06   57.69
  -7   0 -21    1.91    4.91
   7   0 -21   -1.56    6.67
   7   0  21   -1.06   10.05
  -8   0   0 3141.12   52.07
   8   0   0 3252.34   54.16
   8   0   0 3374.87   57.91
  -8   0   1   -0.76    2.78
  -8   0  -1   -0.34   12.23
   8   0   1    0.57    2.77
   8   0  -1    2.39    4.34
   8   0  -1   12.01   13.39
   8   0   1    0.84    5.80
  -8   0   1    1.74    2.63
  -8   0   2 1461.05   24.83
  -8   0  -2 1394.78   26.01
   8   0  -2 1380.73   33.18
   8   0  -2 1438.09   47.06
  -8   0   2 1327.87   24.57
   8   0   2 1465.19   33.33
  -8   0   3    0.38    1.04
  -8   0  -3    0.11    2.04
   8   0   3    0.40    2.49
  -8   0   3    0.55    2.26
   8   0   3    1.47    4.36
  -8   0  -4 2563.79   43.33
   8   0  -4 3353.50   51.02
   8   0  -4 3438.93   56.79
  -8   0  -5   -2.83    5.99
   8   0  -5   -0.37    4.60
   8   0   5    1.13    3.99
  -8   0  -6 1612.93   30.82
   8   0  -6 2751.85   46.08
   8   0   6 2456.49   43.61
  -8   0  -7   -0.68    6.15
   8   0  -7   -0.27    5.13
   8   0   7   -1.03    7.04
  -8   0  -8 3691.97   33.18
  -8   0  -9   -0.29    7.05
   8   0  -9   -1.17    5.63
   8   0   9    1.89    4.08
  -8   0 -10 1569.84   60.46
   8   0 -10 2678.63   96.10
   8   0  10 2640.69   96.51
  -8   0 -11   -1.04    3.99
  -8   0  11    0.22    0.56
  -8   0  11    0.42    0.69
   8   0 -11    0.66    4.32
   8   0  11   -2.92   11.00
  -8   0 -12 1378.62   65.29
  -8   0  12 2272.32   87.79
   8   0 -12 2483.98   99.27
   8   0  12 2404.01   98.31
  -8   0 -13    1.49    3.47
  -8   0  13    0.58    1.28
   8   0 -13   -0.24    4.64
   8   0  13   -0.04    9.37
  -8   0 -14  289.43   35.01
   8   0 -14  485.91   58.62
   8   0  14  466.65   53.23
  -8   0 -15    1.05    4.84
   8   0 -15   -0.83    7.46
   8   0  15   -1.79   10.10
  -8   0 -16  417.04   29.51
   8   0 -16  720.03   52.88
   8   0  16  699.60   54.78
  -8   0 -17    1.00    6.01
   8   0 -17   -0.33    7.85
   8   0  17   -2.95   11.23
  -8   0 -18  129.28   19.28
   8   0 -18  210.81   25.53
   8   0  18  191.11   39.80
  -8   0 -19    6.44    5.92
   8   0 -19    1.03    9.30
   8   0  19   -5.80   10.57
  -8   0 -20  276.67   13.96
   8   0 -20  435.08   34.19
   8   0  20  432.78   36.04
   9   0   0    1.77    4.17
  -9   0   1    0.73    2.04
  -9   0  -1    0.83    2.11
   9   0   1    0.80    1.93
   9   0  -1   -0.28    2.66
   9   0  -1   -1.44    6.68
   9   0   1    2.56    5.08
  -9   0   2   45.32    3.91
   9   0   2   47.50    8.50
   9   0  -2   47.65   14.38
   9   0  -2   52.21   36.59
   9   0   2   43.63    6.90
  -9   0   3    0.76    1.58
  -9   0  -3    1.59    2.36
   9   0  -3    2.82    4.65
   9   0   3    1.84    3.79
  -9   0   4   96.15   10.94
  -9   0  -4   99.33   18.38
   9   0  -4  118.31   14.66
   9   0  -4  120.71   18.19
   9   0   4  127.94   16.60
  -9   0  -5   -1.39    5.18
   9   0  -5   -0.97    4.60
   9   0   5   -1.61    5.94
  -9   0  -6   41.12    8.00
   9   0  -6   70.02   13.25
   9   0   6   68.44   16.69
  -9   0  -7   -0.29    5.75
   9   0  -7    0.38    3.56
   9   0   7   -1.20    7.46
  -9   0  -8  835.93   38.94
   9   0  -8 1255.43   48.63
   9   0   8 1228.93   48.84
  -9   0  -9    1.30    6.77
   9   0  -9    2.05    4.82
   9   0   9    3.33    4.78
  -9   0 -10  717.89   31.47
   9   0 -10 1118.48   52.06
   9   0  10  901.10   37.70
  -9   0 -11    3.99    4.36
   9   0 -11    1.04    4.55
   9   0  11   -0.81    8.94
  -9   0 -12 1193.11   67.53
   9   0 -12 1729.39   92.01
   9   0  12 1689.95   96.74
  -9   0 -13   -2.01    7.38
   9   0 -13    2.19    3.68
   9   0  13    1.84    5.11
  -9   0 -14  521.26   47.63
   9   0 -14  862.43   51.66
   9   0  14  871.40   57.91
  -9   0 -15    1.74    6.08
   9   0 -15   -1.81    7.30
   9   0  15   -3.04   10.23
  -9   0 -16  496.83   34.79
   9   0 -16  839.16   53.22
   9   0  16  759.00   51.26
  -9   0 -17   -2.44    8.40
   9   0 -17    2.06    4.03
   9   0  17    4.02    8.63
  -9   0 -18  256.18   23.13
   9   0 -18  389.68   30.32
   9   0  18  370.61   43.70
  -9   0 -19    3.45    5.18
   9   0 -19    2.00    6.46
   9   0  19    3.08    6.57
  -9   0 -20  298.62   26.16
   9   0 -20  476.29   37.86
   9   0  20  483.13   39.56
 -10   0   0  436.88   10.70
  10   0   0  511.02   11.27
  10   0   0  508.98   14.95
 -10   0   1   -0.45    3.03
 -10   0  -1   -1.14    3.55
  10   0   1   -1.91    2.89
  10   0  -1    0.64    2.99
  10   0  -1    1.99    2.74
  10   0   1    2.20    3.46
 -10   0   2 1109.75   22.97
 -10   0  -2 1093.69   26.54
  10   0  -2 1140.16   22.96
  10   0  -2 1031.20   28.96
  10   0   2 1101.52   27.24
 -10   0   3    0.00    1.64
 -10   0  -3    1.29    1.93
  10   0  -3    0.40    1.16
  10   0  -3   -1.74    4.35
  10   0   3   -2.45    5.42
 -10   0   4 1340.76   25.59
  10   0  -4 1417.05   26.95
  10   0  -4 1462.38   31.54
  10   0   4 1483.33   39.15
 -10   0  -5   -0.20    8.06
  10   0  -5    0.69    2.85
 -10   0  -6 1875.31   70.83
  10   0  -6 2343.59   89.47
  10   0   6 2209.98   83.55
 -10   0  -7   -2.11    6.03
  10   0  -7   -0.67    5.50
  10   0   7   -0.75    7.65
 -10   0  -8 1600.02   64.55
  10   0  -8 2173.01   78.53
  10   0   8 2124.84   78.04
 -10   0  -9    1.18    3.89
  10   0  -9    2.02    4.25
  10   0   9   -0.24   10.08
 -10   0 -10 1725.32   70.52
  10   0 -10 2537.40  106.70
  10   0  10 2529.83  102.50
 -10   0 -11   -2.08    6.97
  10   0 -11    3.21    3.99
  10   0  11    0.93    7.27
 -10   0 -12  613.08   40.15
  10   0 -12  865.11   58.26
  10   0  12  866.25   54.57
 -10   0 -13    1.22    5.14
  10   0 -13    2.84    6.48
  10   0  13   -0.16   10.51
 -10   0 -14  158.70   24.13
  10   0 -14  218.72   32.00
  10   0  14  210.82   29.40
 -10   0 -15    4.32    4.57
  10   0 -15    1.44    6.77
  10   0  15   -0.92    9.06
 -10   0 -16   97.65   15.48
  10   0 -16  146.71   20.75
  10   0  16  152.64   23.08
 -10   0 -17    0.85    5.62
  10   0 -17    2.74    6.42
  10   0  17    2.69    4.87
 -10   0 -18  256.52   25.66
  10   0 -18  416.31   37.51
  10   0  18  401.59   37.31
 -10   0 -19    3.38    7.84
  10   0 -19    2.35    4.32
  10   0  19    2.51    4.23
 -10   0 -20  153.03   28.11
  10   0 -20  215.34   37.09
  10   0  20  210.59   45.61
 -11   0   0    1.42    2.07
  11   0   0    0.23    1.83
  11   0   0    2.19    3.99
 -11   0   1    0.75    2.63
 -11   0  -1    1.35    2.58
  11   0  -1   -0.19    1.50
  11   0  -1   -1.74    4.49
  11   0   1    3.17    8.74
 -11   0   2   10.70    5.01
  11   0  -2    8.45    5.32
  11   0  -2    6.27    6.88
  11   0   2   11.94    6.27
 -11   0   3    0.29    1.51
 -11   0  -3    1.33    2.54
  11   0  -3    3.79    2.46
  11   0   3    2.02    3.60
 -11   0   4   13.46    5.95
 -11   0  -4   13.09    9.39
  11   0  -4   13.33    5.86
  11   0   4   12.65    7.63
 -11   0   5    1.31    0.99
 -11   0  -5    1.29    3.22
  11   0  -5    0.01    2.69
  11   0   5   -2.82    6.81
 -11   0  -6  223.79   24.24
  11   0  -6  266.88   20.78
  11   0   6  235.20   19.58
 -11   0  -7   -1.40    6.07
  11   0  -7   -0.64    4.56
  11   0   7    0.35    5.41
 -11   0  -8  412.48   35.35
  11   0  -8  551.01   48.09
  11   0   8  508.81   42.66
 -11   0  -9   -1.41    6.89
  11   0   9   -1.13    8.32
 -11   0 -10  790.36   45.65
  11   0 -10 1050.30   56.93
  11   0  10 1053.09   61.24
 -11   0 -11    1.44    3.25
  11   0 -11    1.61    5.24
  11   0  11    3.33    7.85
 -11   0 -12  633.55   40.68
  11   0 -12  894.23   63.45
  11   0  12  861.25   55.68
 -11   0 -13    9.04   13.83
  11   0 -13   -0.39    4.53
  11   0  13   -0.03   11.16
 -11   0 -14  323.15   17.07
  11   0 -14  414.51   46.70
  11   0  14  405.44   47.10
 -11   0 -15   -1.08    8.11
  11   0 -15    1.43    4.45
  11   0  15    3.45    4.28
 -11   0 -16  175.83   25.56
  11   0 -16  223.12   28.28
  11   0  16  246.10   33.05
 -11   0 -17    0.06    5.76
  11   0 -17    1.45    8.18
  11   0  17    2.08    3.08
 -11   0 -18  143.40   27.28
  11   0 -18  197.53   31.52
  11   0  18  196.29   33.52
 -11   0 -19    2.28    4.33
  11   0 -19    3.82    4.36
  11   0  19   -5.30    9.88
 -12   0   0 1089.02   41.92
  12   0   0 1110.77   50.43
 -12   0  -1   -0.06    6.34
 -12   0   1    1.09    2.11
  12   0  -1    1.74    2.66
  12   0   1    1.77    3.08
 -12   0   2  720.51   27.92
 -12   0  -2  803.64   34.20
  12   0  -2  739.20   28.32
  12   0  -2  745.37   34.16
  12   0   2  729.80   33.78
 -12   0   3    0.27    2.01
 -12   0  -3    1.04    2.40
  12   0  -3   -0.53    2.40
  12   0  -3   -0.27    4.99
  12   0   3    5.62    7.65
 -12   0   4  962.31   34.24
 -12   0  -4  981.56   44.26
  12   0  -4  837.33   29.90
  12   0  -4  809.46   36.49
  12   0   4  887.41   35.05
 -12   0   5    0.15    0.65
 -12   0  -5   -0.36   11.38
  12   0  -5    0.11    0.47
  12   0  -5   -1.03    5.13
  12   0   5   -0.52    6.75
 -12   0  -6  609.92   27.92
  12   0  -6  640.90   31.60
  12   0   6  600.20   33.67
 -12   0  -7    0.26    4.92
  12   0  -7    1.62    5.14
  12   0   7   -0.49    8.13
 -12   0  -8  712.47   40.86
  12   0  -8  891.13   51.64
  12   0   8  865.14   49.72
 -12   0  -9    2.40    3.52
  12   0  -9    1.14    5.15
  12   0   9   -3.06    8.01
 -12   0 -10  796.59   60.46
  12   0 -10 1143.08   70.02
  12   0  10 1082.80   69.73
 -12   0 -11   -0.54    9.07
  12   0 -11   -0.65    7.13
  12   0  11   -0.39   10.00
 -12   0 -12  859.55   47.89
  12   0 -12 1136.00   62.45
  12   0  12 1152.83   71.22
 -12   0 -13   -2.94    8.03
  12   0 -13    0.29    4.02
  12   0  13   -4.92   10.87
 -12   0 -14  126.50   36.98
  12   0 -14  152.53   20.53
  12   0  14  149.28   34.44
 -12   0 -15    7.26   15.33
  12   0 -15   -0.41    6.69
  12   0  15    3.58    9.89
 -12   0 -16  169.99   23.27
  12   0 -16  225.19   26.95
  12   0  16  204.52   32.40
 -12   0 -17    2.93    7.24
  12   0 -17    0.72    3.49
  12   0  17    3.03    5.93
 -12   0 -18   98.51   34.59
  12   0 -18  121.39   10.19
  12   0  18  113.99   37.23
 -13   0   0    2.05    3.72
  13   0   0    3.54    4.41
 -13   0   1   -0.17    3.69
 -13   0  -1    1.16    3.62
  13   0  -1    0.63    1.65
  13   0  -1    2.14    5.11
  13   0   1   -1.34    5.76
 -13   0   2  111.76   10.07
 -13   0  -2  124.66   13.24
  13   0  -2  101.78    9.91
  13   0  -2   94.10   19.30
  13   0   2  101.41   11.18
 -13   0   3    0.38    1.39
 -13   0  -3    0.18    2.96
  13   0  -3    3.99    2.95
  13   0  -3    0.82    3.00
  13   0   3    2.72    6.70
 -13   0   4  286.54   23.38
 -13   0  -4  299.30   25.79
  13   0  -4  263.34   21.73
  13   0  -4  223.20   30.39
  13   0   4  270.62   24.11
 -13   0   5    0.37    0.75
 -13   0  -5    0.50    2.41
  13   0  -5   -0.10    0.76
  13   0  -5   -2.19    6.08
  13   0   5    3.43    4.96
 -13   0  -6  153.79   28.14
  13   0  -6  159.19   20.03
  13   0   6  130.75   16.92
 -13   0  -7   -2.63    7.04
  13   0  -7   -2.40    6.71
  13   0   7    2.42    5.14
 -13   0  -8  199.05   21.91
  13   0  -8  213.50   25.57
  13   0   8  205.04   34.52
 -13   0  -9    0.38    4.13
  13   0  -9   -1.47    7.43
  13   0   9    2.96    8.42
 -13   0 -10   89.25   19.91
  13   0 -10  112.39   24.99
  13   0  10  114.12   17.12
 -13   0 -11   -0.29    7.89
  13   0 -11    3.93    5.70
  13   0  11    4.24    9.24
 -13   0 -12   98.99   13.17
  13   0 -12  135.75   13.76
  13   0  12  114.28   33.36
 -13   0 -13    5.44    6.24
  13   0 -13   -0.14    5.70
  13   0  13    6.03    9.91
 -13   0 -14   87.87   17.81
  13   0 -14   93.36   21.11
  13   0  14  107.69   35.17
 -13   0 -15    0.69    2.69
  13   0 -15    2.05    4.34
  13   0  15   -1.25    6.32
 -13   0 -16  179.82   24.95
  13   0 -16  224.37   26.55
  13   0  16  219.41   50.59
 -13   0 -17    1.65    4.59
  13   0 -17   -1.28    6.60
  13   0  17    3.44    6.94
 -13   0 -18  195.45   27.20
  13   0 -18  259.90   44.07
  13   0  18  266.08   38.14
 -14   0   0 1481.44   61.44
  14   0   0 1447.65   62.49
 -14   0  -1   -0.38    5.37
 -14   0   1    1.18    2.59
 -14   0   2  391.64   33.54
 -14   0  -2  395.71   33.87
  14   0  -2  383.35   34.84
  14   0   2  410.89   36.88
 -14   0   3    0.71    2.00
 -14   0  -3   -0.75    3.86
  14   0  -3    7.12    6.45
  14   0  -3    1.16    3.85
  14   0   3   -0.52    6.63
 -14   0   4  171.78   16.95
 -14   0  -4  206.78   25.19
  14   0  -4  196.53   22.83
  14   0  -4  179.19   22.23
  14   0   4  166.12   19.45
 -14   0   5   -0.07    0.70
 -14   0  -5    0.74    4.72
  14   0  -5    9.22    8.41
  14   0   5    1.92    3.91
 -14   0  -6  158.13   25.48
  14   0  -6  146.22   12.17
  14   0   6  154.97   18.23
 -14   0  -7   -0.39    5.98
  14   0  -7   -0.87    6.22
  14   0   7   -0.95    6.87
 -14   0  -8  175.66   32.56
  14   0  -8  168.86   20.80
  14   0   8  164.93   21.20
 -14   0  -9   -0.88    7.79
  14   0  -9    1.73    5.29
  14   0   9    2.35    8.74
 -14   0 -10  236.99   31.67
  14   0 -10  264.19   30.72
  14   0  10  256.43   31.34
 -14   0 -11    0.81    6.05
  14   0 -11   -0.15    6.44
  14   0  11    6.33    8.06
 -14   0 -12  184.42   26.02
  14   0 -12  200.64   26.33
  14   0  12  204.94   28.96
 -14   0 -13    2.95    7.67
  14   0 -13   -0.23    6.45
  14   0  13    1.50    6.22
 -14   0 -14  154.12   39.93
  14   0 -14  148.76   18.75
  14   0  14  168.75   23.60
  14   0 -15   -0.85    6.34
  14   0  15    3.10    7.30
 -14   0 -16   79.58   13.74
  14   0 -16  101.96   11.72
  14   0  16   72.53   48.58
 -14   0 -17    2.91    5.32
  14   0 -17    2.20    3.84
  14   0  17    2.32    8.30
  15   0   0    4.63    7.81
 -15   0   1    0.91    3.13
 -15   0  -1    1.04    2.94
  15   0  -1   -2.42    6.77
  15   0   1   -4.19    6.66
 -15   0   2   -0.08    2.82
 -15   0  -2    1.38    4.82
  15   0  -2    1.58    2.42
  15   0   2   -2.75    7.19
 -15   0   3    1.17    2.42
 -15   0  -3   -0.18    5.40
  15   0  -3   -3.32    6.18
  15   0   3   -0.66    6.06
 -15   0   4   24.65    5.41
 -15   0  -4   33.69    8.57
  15   0  -4   22.22   14.38
  15   0   4   30.58   15.26
 -15   0  -5    1.59    3.13
  15   0  -5   -1.25    6.19
  15   0   5    1.40    5.64
 -15   0  -6   46.27   12.69
  15   0  -6   33.92   21.25
  15   0   6   45.40   25.13
 -15   0  -7   -0.76    6.86
  15   0  -7   -0.98    6.36
  15   0   7   -0.74    4.06
 -15   0  -8  161.72   31.10
  15   0  -8  135.94   20.73
  15   0   8  126.29   18.42
 -15   0  -9    0.88    3.25
  15   0  -9   -0.75    6.60
  15   0   9    3.49    5.07
 -15   0 -10   90.94   17.69
  15   0 -10   92.70    9.02
  15   0  10   99.02   11.73
 -15   0 -11    4.95    5.67
  15   0 -11    0.48    4.20
  15   0  11   -1.06    8.79
 -15   0 -12  159.77   33.50
  15   0 -12  135.77   13.52
  15   0  12  122.25   15.36
 -15   0 -13    1.49    6.34
  15   0 -13    1.24    5.88
  15   0  13   -0.02   10.06
 -15   0 -14   91.94   23.90
  15   0 -14   85.82   23.06
  15   0  14   94.80   36.53
 -15   0 -15    3.96    9.08
  15   0 -15    3.64    7.79
  15   0  15    3.23    8.17
 -15   0 -16  118.73   23.37
  15   0 -16  153.73   27.34
  15   0  16  146.85   39.72
 -16   0   0  960.51   58.91
  16   0   0 1023.07   64.64
 -16   0   1    0.75    3.65
 -16   0  -1    0.24    3.06
  16   0  -1   -1.52    6.01
  16   0   1   -0.45    6.71
 -16   0   2  465.56   51.46
 -16   0  -2  403.65   47.85
  16   0  -2  406.28   47.42
  16   0   2  406.82   47.58
 -16   0   3    1.25    2.31
 -16   0  -3   -0.75    6.26
  16   0  -3   -0.41    3.26
  16   0   3   -0.70    7.58
 -16   0  -4  125.34   30.65
  16   0  -4  117.50   15.23
  16   0   4  114.91   32.56
 -16   0  -5   -0.77    6.04
  16   0  -5    4.06    6.49
  16   0   5    2.75    5.24
 -16   0  -6  205.70   26.66
  16   0  -6  164.81   21.72
  16   0   6  189.12   26.04
 -16   0  -7    0.87    7.66
  16   0  -7    1.10    4.18
  16   0   7    1.08    4.13
 -16   0  -8  182.08   37.40
  16   0  -8  124.85   26.78
  16   0   8  130.37   30.78
 -16   0  -9   -3.40    6.80
  16   0  -9   -2.15    5.47
  16   0   9   -0.52    7.61
 -16   0 -10  122.27   27.66
  16   0 -10  106.11   16.05
  16   0  10  115.13   29.77
 -16   0 -11   -0.73    8.14
  16   0 -11   -5.17    6.11
  16   0  11    2.76    7.11
 -16   0 -12   46.88   28.59
  16   0 -12   53.00   22.28
  16   0  12   46.82   29.53
 -16   0 -13    2.54    3.89
  16   0 -13    2.15    3.52
  16   0  13   -0.71    5.78
 -16   0 -14   58.03   18.36
  16   0 -14   60.95   18.47
  16   0  14   57.67   41.79
 -16   0 -15    2.21    9.77
  16   0 -15    0.58    3.47
  16   0  15   -3.67   10.52
 -17   0   0    0.94    2.66
  17   0   0    2.22    6.81
 -17   0   1    0.88    2.16
 -17   0  -1   -0.09    4.04
  17   0  -1    1.88    4.71
  17   0   1    2.35    4.36
 -17   0  -2    3.70    4.75
  17   0  -2   -0.86    6.70
  17   0   2   -0.36    7.05
 -17   0  -3   -0.67    5.52
  17   0  -3   -0.36    6.72
  17   0   3   -0.83    7.97
 -17   0  -4  105.38   17.41
  17   0  -4   90.06   10.79
  17   0   4   98.43   12.63
 -17   0  -5    2.11    3.67
  17   0  -5   -3.94    6.87
  17   0   5    0.62    4.46
 -17   0  -6  134.70   19.28
  17   0  -6  108.74   10.37
  17   0   6  114.85   25.57
 -17   0  -7    0.47    4.84
  17   0  -7   -0.64    6.09
  17   0   7   -2.56    7.57
 -17   0  -8   33.33   10.28
  17   0  -8   26.61   20.62
  17   0   8   30.99   22.50
 -17   0  -9    1.58    4.18
  17   0  -9    1.00    4.13
  17   0   9   -0.92    7.32
 -17   0 -10    2.28    4.95
  17   0 -10   -0.46    3.14
  17   0  10    1.24    5.52
 -17   0 -11    1.72    6.53
  17   0 -11    1.30    3.44
  17   0  11    2.46    7.21
 -17   0 -12   10.28   11.34
  17   0 -12   11.02   13.29
  17   0  12   16.17   19.28
 -17   0 -13   -0.53    7.90
  17   0 -13    0.43    4.01
  17   0  13    1.88    5.92
 -17   0 -14   49.16   17.09
  17   0 -14   47.00    7.52
  17   0  14   43.45   37.06
  18   0   0  532.22   38.08
 -18   0  -1    0.52    3.93
  18   0  -1    1.39    2.48
  18   0   1    1.79    3.57
 -18   0  -2   92.96    8.35
  18   0  -2   81.93   10.55
  18   0   2   82.28   17.50
 -18   0  -3    0.37    4.13
  18   0  -3    1.49    3.47
  18   0   3   -0.73    7.53
 -18   0  -4   61.19   17.62
  18   0  -4   59.45   21.63
  18   0   4   66.97   30.29
 -18   0  -5   -0.56    6.11
  18   0  -5    2.35    3.40
  18   0   5    4.05    7.98
 -18   0  -6    7.38    6.54
  18   0  -6    3.00    3.98
  18   0   6    3.96    4.75
 -18   0  -7    2.92    3.44
  18   0  -7    2.26    4.15
  18   0   7    3.81    5.32
 -18   0  -8   10.31    9.87
  18   0  -8    8.95    6.43
  18   0   8   14.13   17.26
 -18   0  -9   -3.11    6.63
  18   0  -9    2.66    7.08
  18   0   9   -3.32    7.18
 -18   0 -10   32.62   29.16
  18   0 -10   27.75   15.45
  18   0  10   25.57   20.05
 -18   0 -11    2.39    5.85
  18   0 -11    2.10    8.60
  18   0  11    2.97    4.01
 -18   0 -12   65.92   20.38
  18   0 -12   58.52    8.49
  18   0  12   43.28   22.53
  19   0   0    1.95    7.13
  19   0  -1    3.58    7.06
  19   0   1   -1.01    7.81
 -19   0  -2   15.86   13.44
  19   0  -2   17.79   22.66
  19   0   2   18.25   14.62
 -19   0  -3    3.03    4.03
  19   0  -3   -1.84    8.47
  19   0   3   -0.82    7.81
 -19   0  -4   80.83   23.44
  19   0  -4   75.45   23.02
  19   0   4   79.49   11.81
 -19   0  -5    1.27    4.70
  19   0  -5   -2.79    7.40
  19   0   5    1.31    5.28
 -19   0  -6   28.76   10.97
  19   0  -6   21.03   12.03
  19   0   6   25.49   25.55
 -19   0  -7   -3.50    5.48
  19   0  -7    0.36    4.89
  19   0   7    2.54    3.68
 -19   0  -8    3.21    4.85
  19   0  -8    2.99    2.73
  19   0   8    6.16    8.25
 -19   0  -9   12.58   22.94
  19   0  -9    1.11    3.83
  19   0   9    1.97    5.39
 -19   0 -10   29.39   24.38
  19   0 -10   21.40   16.78
  19   0  10   23.99   31.29
 -19   0 -11   -0.14    6.15
  19   0 -11    6.43    6.25
  19   0  11   -1.76    7.75
  20   0   0   68.69   25.02
  20   0  -1    0.27    7.13
  20   0   1   -4.64    7.96
  20   0  -2   82.44   10.73
  20   0   2   80.98   11.63
  20   0  -3    1.47    4.62
  20   0   3    2.33    4.02
 -20   0  -4    3.09    3.83
  20   0  -4    3.16    2.65
  20   0   4    2.14    5.35
 -20   0  -5    2.58    3.42
  20   0  -5    0.92    4.87
  20   0   5   -2.02    8.08
 -20   0  -6    1.82    3.47
  20   0  -6    1.99    7.09
  20   0   6    0.44    6.11
 -20   0  -7    1.36    4.32
  20   0  -7    3.72    4.96
  20   0   7   -4.07    8.11
 -20   0  -8    3.34   10.13
  20   0  -8    1.55    5.73
  20   0   8    2.51    4.72
 -20   0  -9   -0.07    6.50
  20   0  -9    1.74    3.89
  20   0   9    3.01    7.80
  21   0   0    0.65    4.59
  21   0  -1   -1.20    7.79
  21   0   1   -0.12    7.46
  21   0  -2    8.96   11.07
  21   0   2   18.74   14.12
  21   0  -3   -2.86    7.53
  21   0   3   -0.90    8.59
  21   0  -4    2.53    5.69
  21   0   4    3.38    6.49
  21   0  -5    1.40    4.26
  21   0   5   -0.38    8.27
 -21   0  -6    6.78    7.25
  21   0  -6    8.47    7.20
  21   0   6    5.48   11.20
   0  -1  -3    1.83    2.18
   0   1   3   -0.32    4.17
   0   1  -3    2.90    1.87
   0  -1   3    1.92    3.38
   0   1   3    0.77    2.21
   0   1  -3    3.44    4.67
   0  -1   3    1.53    2.28
   0   1   3    3.31    2.89
   0  -1  -4    1.23    2.98
   0   1   4    0.50    1.95
   0   1  -4    1.46    2.64
   0  -1   4    1.38    3.16
   0   1   4   -0.08    3.63
   0   1  -4    2.46    2.64
   0  -1   4    2.70    4.21
   0   1   4    2.32    2.35
   0  -1  -5   -0.85    4.01
   0   1   5    0.31    2.47
   0   1  -5    1.45    3.19
   0  -1   5   -0.02    2.71
   0   1   5    0.48    1.73
   0   1  -5   -0.06    3.59
   0  -1   5   -1.12    3.80
   0   1   5   -0.82    4.10
   0  -1  -6   -0.13    3.57
   0   1   6    0.21    2.06
   0   1  -6    0.83    1.64
   0  -1   6    1.99    2.58
   0   1  -6   -0.70    3.82
   0   1   6    1.19    2.92
   0  -1   6    0.46    2.02
   0  -1  -7    0.59    2.51
   0   1  -7    0.46    3.25
   0   1   7    0.77    1.43
   0  -1   7    0.15    3.09
   0   1  -7    1.54    3.26
   0   1   7    1.05    2.23
   0  -1   7    1.23    3.12
   0   1   7    0.91    3.62
   0  -1  -8    0.78    2.83
   0   1  -8    1.25    3.71
   0   1   8    0.66    1.39
   0   1  -8    1.43    2.83
   0   1   8    1.51    4.19
   0   1   8    3.18    5.76
   0  -1  -9    6.28    4.58
   0   1  -9    1.73    3.63
   0  -1   9    0.45    1.93
   0   1  -9    1.61    6.12
   0   1   9   -0.30    2.97
   0  -1 -10    1.93    2.99
   0   1 -10   -1.16    3.91
   0   1 -10    0.71    7.64
   0   1  10    0.30    2.23
   0  -1 -11    1.98    2.75
   0   1 -11    0.61    2.96
   0   1 -11    2.21    3.89
   0   1  11    0.42    5.70
   0  -1 -12    1.92    2.91
   0   1 -12    2.71    3.34
   0   1 -12    2.74    2.66
   0   1  12    2.81    3.30
   0  -1 -13    1.71    5.08
   0   1 -13    3.53    3.12
   0   1 -13   -1.62    6.42
   0   1  13   -1.76    5.40
   0  -1 -14    1.16    4.32
   0   1 -14    1.98    4.80
   0   1  14    1.79    2.20
   0  -1 -15    1.46    2.69
   0   1 -15    1.95    2.93
   0   1  15   -2.05    6.20
   0  -1  15   -1.42    6.80
   0  -1 -16    2.33    3.85
   0   1 -16    0.25    4.24
   0   1  16    1.58    4.91
   0  -1  16    2.64    5.39
   0  -1 -17    1.65    3.98
   0   1 -17    2.24    3.48
   0   1  17    1.78    4.45
   0  -1  17    8.45   10.76
   0  -1 -18    0.18    3.08
   0   1 -18   -0.11    5.80
   0   1  18    2.88    5.15
   0  -1  18   -0.28    8.53
   0  -1 -19    1.14    3.48
   0   1 -19   -3.26    5.90
   0   1  19    2.22    3.28
   0  -1  19    2.71    4.97
   0  -1 -20    2.00    4.86
   0   1 -20    1.08    5.25
   0   1  20    3.60    5.87
   0  -1  20    3.85    5.09
   0  -1 -21    5.66    7.68
   0   1 -21    6.52    5.28
   0   1  21    5.61    4.81
   0  -1  21    1.87    9.37
   0  -1 -22    1.73    4.22
   0   1 -22    1.71    4.20
   0   1  22   -0.33    8.19
   0  -1  22    1.99    4.39
   1  -1  -3   70.74    8.21
  -1   1   3   68.19    8.36
  -1  -1  -3   78.79   12.08
   1   1   3   66.36    4.98
  -1   1  -3   45.82    6.57
   1   1  -3   42.95    5.61
   1  -1   3   48.79    6.47
  -1  -1   3   55.85    8.06
  -1   1  -3   98.22    6.33
   1  -1   3   76.10    9.17
   1  -1  -3   89.39   10.60
  -1   1   3   87.95    9.74
   1   1  -3   95.36    8.22
  -1  -1   3   91.51    4.61
   1   1   3   85.05    9.93
  -1  -1  -3   81.87   10.90
   1  -1  -4   34.18    4.85
  -1  -1  -4   29.12    5.40
  -1   1   4   25.90    7.08
   1   1   4   24.84    7.41
  -1   1  -4   19.34   10.28
   1   1  -4   16.01    3.91
   1  -1   4   19.03    3.88
  -1  -1   4   21.71    3.41
  -1   1  -4   34.55    5.86
   1  -1  -4   37.64    7.47
   1  -1   4   39.26    5.13
  -1   1   4   37.27    4.98
   1   1  -4   38.20    6.59
  -1  -1   4   38.46    6.22
   1   1   4   39.30    6.39
  -1  -1  -4   37.62    8.52
   1  -1  -5   11.12    8.58
  -1  -1  -5   11.56    7.76
  -1   1   5    8.80    6.01
   1   1   5    8.51    4.26
   1   1  -5    6.94    4.94
  -1   1  -5    3.95    4.09
  -1  -1   5    5.93    4.10
   1  -1   5    8.38    6.07
   1   1   5   11.33    6.40
  -1   1  -5   10.61    8.82
   1  -1  -5   15.21    9.53
   1  -1   5   11.24    5.95
  -1   1   5   10.36    6.22
   1   1  -5   12.22    7.19
  -1  -1   5   10.34    5.46
   1   1   5   16.56   11.51
   1  -1  -6  125.68    5.35
  -1  -1  -6  102.38    9.42
  -1   1   6   83.02    7.07
   1   1   6   79.74    4.86
   1   1  -6   75.88    4.59
  -1   1  -6   72.26    5.59
   1  -1   6   62.07    8.24
  -1  -1   6   69.69    3.30
  -1   1  -6  151.86    7.41
   1   1   6  139.97    6.12
   1  -1  -6  148.82    6.17
   1  -1   6  146.67    5.79
   1   1  -6  139.39    6.78
  -1   1   6  140.52    8.50
  -1  -1   6  143.81    6.04
   1   1   6  142.71    6.74
   1  -1  -7   97.47   15.91
  -1  -1  -7   85.38    8.57
  -1   1   7   61.74    5.46
  -1   1  -7   57.57   12.83
   1   1   7   64.14    6.47
   1   1  -7   67.31    6.73
   1  -1   7   49.39    5.37
  -1  -1   7   57.37    5.15
  -1   1  -7  126.50   11.65
   1  -1  -7  120.68   10.70
   1   1   7  115.87   10.07
   1   1  -7  119.35   11.97
   1  -1   7  119.17   10.39
  -1   1   7  116.82    9.93
  -1  -1   7  118.34   12.23
   1   1   7  117.97   11.05
   1  -1  -8    6.86    5.04
  -1  -1  -8    4.40    4.63
   1   1  -8    3.70    5.94
   1   1   8    4.07    3.19
  -1   1  -8    2.68    2.44
  -1   1   8    3.28    1.52
   1  -1   8    2.69    3.30
  -1  -1   8    2.38    1.89
  -1   1  -8    6.86    4.91
   1  -1  -8    7.63    5.47
   1   1   8    6.33    4.95
   1   1  -8    8.86    6.04
  -1   1   8    6.58    5.95
   1   1   8    8.16    3.92
   1  -1  -9    1.86    3.93
  -1  -1  -9    5.58    5.77
  -1   1  -9    3.84    3.91
   1   1  -9    4.13    3.30
  -1   1   9    1.41    1.24
  -1  -1   9    3.54    2.36
  -1   1  -9    0.14    5.60
   1  -1  -9    2.72    5.19
   1   1  -9    1.85    3.42
   1   1   9    2.65    5.06
   1  -1 -10   77.08    6.18
  -1  -1 -10   63.37   17.31
   1   1 -10   63.08   15.71
  -1   1 -10   53.34    5.95
  -1  -1  10   42.82    3.60
   1  -1 -10   82.78    7.05
  -1   1 -10   99.67    9.15
   1   1 -10   93.18    8.40
   1   1  10   92.59   13.15
   1  -1 -11   77.70    8.77
  -1  -1 -11   76.71   13.63
  -1   1 -11   64.30   11.68
   1   1 -11   79.87    7.76
   1  -1 -11  102.23    8.74
   1   1 -11   98.83    8.09
   1   1  11   95.12    8.48
   1  -1 -12   18.32   12.36
  -1  -1 -12   14.12    8.19
   1   1 -12   15.49    9.26
  -1   1 -12   11.74   11.38
   1   1 -12   19.43   12.11
   1   1  12   20.67   13.92
   1  -1  12   13.86    8.75
   1  -1 -13    7.26    5.98
  -1  -1 -13    4.24    2.68
  -1   1 -13    2.34    3.57
   1   1 -13    5.28    4.42
   1   1 -13    4.39    3.78
   1   1  13   11.10    5.34
  -1   1  13    6.31    5.93
   1  -1  13    7.17    7.01
   1  -1 -14   20.50   12.58
  -1  -1 -14   17.76   10.65
   1   1 -14   18.75   11.73
  -1   1 -14   16.46   11.79
   1   1 -14   22.52   12.28
   1   1  14   28.20   19.79
  -1   1  14   25.28   12.59
   1  -1  14   27.03   12.09
   1  -1 -15   22.72   14.94
  -1  -1 -15   19.16   12.40
   1   1 -15   20.75   16.06
  -1   1 -15   20.98   12.59
   1   1 -15   21.90   14.36
   1   1  15   26.73   17.75
   1  -1  15   31.47   13.88
  -1   1  15   26.03   15.80
   1  -1 -16  119.60   11.96
  -1  -1 -16   77.18   12.57
  -1   1 -16   73.59    9.03
   1   1 -16   72.23    8.81
   1   1  16   98.00   17.04
  -1   1  16  103.72   19.27
   1  -1  16  108.27   20.08
   1  -1 -17    7.40    6.70
  -1  -1 -17    6.48    6.51
   1   1 -17    5.80    4.98
  -1   1 -17    2.49    3.79
   1   1  17   12.61    9.25
  -1   1  17    6.37    8.96
   1  -1  17    9.67    6.13
  -1  -1  17    9.06    8.78
   1  -1 -18    2.60    3.78
  -1  -1 -18   -0.04    7.08
   1   1 -18    0.80    3.03
  -1   1 -18    2.51    4.54
   1   1  18    3.52    2.57
   1  -1  18    4.20    6.06
  -1   1  18    2.59    2.98
  -1  -1  18   -4.69    8.17
   1  -1 -19    3.66    5.76
  -1  -1 -19    9.77   10.48
   1   1 -19    0.90    3.81
  -1   1 -19   -1.07    6.90
   1   1  19    4.23    7.22
   1  -1  19    3.74    8.14
  -1   1  19    5.80    3.21
  -1  -1  19    2.42    6.97
   1  -1 -20    4.93    7.72
  -1  -1 -20    5.10    9.92
   1   1 -20    6.50    5.18
  -1   1 -20    2.47    5.61
   1   1  20    9.24    7.11
   1  -1  20    7.11    7.43
  -1   1  20   -1.08    7.95
  -1  -1  20    5.49    9.80
   1  -1 -21   -0.80    5.97
  -1  -1 -21    3.87    6.24
  -1   1 -21    1.45    4.33
   1   1 -21    1.34    6.66
   1   1  21   -0.40    5.70
   1  -1  21   -0.82    8.03
  -1   1  21    4.30    5.97
  -1  -1  21    3.98    6.08
   1  -1 -22    2.72    6.16
  -1  -1 -22    3.76    7.29
   1   1 -22    4.22    3.89
  -1   1 -22    2.00    5.41
   1   1  22    5.92    3.19
  -1   1  22    5.25    5.72
  -1  -1  22    5.30    8.63
   1  -1  22    1.12    4.83
  -2  -1  -1   66.12    9.14
   2   1   1   75.05    9.03
  -2   1  -1   62.24    4.45
   2  -1   1   63.00    7.96
  -2   1   1   85.74    4.08
   2  -1  -1   82.00    4.64
   2   1  -1   81.51    8.60
  -2  -1   1   78.55    8.61
   2   1  -1   81.55    5.21
  -2  -1   1   80.27    4.60
   2  -1  -1   69.55    5.29
  -2   1   1   51.78    6.92
   2   1   1   51.22   10.07
  -2  -1  -1   50.28    5.18
   2  -1   1   81.53    9.38
  -2   1  -1   80.42    9.21
  -2  -1  -2  227.45    7.29
  -2   1  -2  157.51    5.95
  -2  -1   2  287.14    5.58
  -2   1   2  284.97    6.76
   2  -1  -2  268.39    7.13
   2  -1  -2  303.32    7.05
   2   1  -2  296.58    9.03
  -2   1   2  290.72    6.52
  -2  -1   2  269.46    6.51
   2   1   2  238.25    7.57
  -2  -1  -2  248.32    6.66
   2  -1   2  326.39    9.68
  -2   1  -2  296.94    8.13
  -2   1   3   30.04    7.97
  -2  -1  -3   30.76   16.34
   2   1   3   30.19    8.09
  -2   1  -3   23.38   14.21
   2   1  -3   22.16    6.40
   2  -1   3   21.70   12.38
  -2  -1   3   30.43    4.02
  -2   1   3   35.81    5.58
   2  -1   3   36.82    5.76
   2  -1  -3   38.79   10.24
  -2   1   3   34.01   10.92
   2   1  -3   36.91    6.04
  -2  -1   3   36.09    6.29
   2   1   3   40.85   14.89
  -2  -1  -3   35.67    5.43
   2  -1   3   34.77    6.45
   2  -1  -4  129.12    4.49
  -2   1   4  103.75    5.08
  -2  -1  -4   95.49   10.37
   2   1   4   90.54    5.65
   2   1  -4   68.85    3.19
  -2   1  -4   62.45    4.97
   2  -1   4   65.66    3.50
  -2  -1   4   96.91    3.13
   2  -1   4  129.80    5.82
   2  -1  -4  145.49    8.48
   2   1  -4  147.65   10.75
  -2   1   4  144.10    4.57
  -2  -1   4  140.00    5.35
   2   1   4  136.65    7.17
  -2  -1  -4  136.76    5.45
   2  -1   4  141.25    6.22
   2  -1  -5   97.14    5.92
  -2   1   5   78.61    3.55
  -2  -1  -5   78.38    5.12
   2   1   5   70.20    4.46
   2   1  -5   64.19    4.24
  -2   1  -5   47.38    5.87
   2  -1   5   48.77    4.08
  -2  -1   5   68.39    5.25
   2  -1   5  109.65    5.51
   2  -1  -5  118.17    5.66
   2   1  -5  117.39    5.82
  -2   1   5  112.34    4.77
  -2  -1   5  115.07    5.09
   2   1   5  110.68    6.04
  -2  -1  -5  107.40    5.00
   2  -1   5  105.98    5.02
   2  -1  -6  401.68    9.61
  -2  -1  -6  313.61    9.08
  -2   1   6  286.66    7.60
   2   1   6  256.12    7.95
   2   1  -6  276.32    7.04
  -2   1  -6  200.95    7.53
   2  -1   6  196.94    6.50
  -2  -1   6  262.96    6.21
   2  -1   6  463.05   11.60
   2  -1  -6  468.62   10.77
   2   1  -6  487.72   12.56
  -2   1   6  456.72    9.94
  -2  -1   6  450.72   11.04
   2   1   6  445.61   11.66
   2  -1   6  471.74   12.17
   2  -1  -7    9.85    8.31
  -2  -1  -7    9.07    7.04
  -2   1   7    8.06    5.07
   2   1  -7   10.32    7.17
   2   1   7    7.17    6.75
  -2   1  -7    6.69    5.29
   2  -1   7    4.38    4.61
  -2  -1   7    5.01    3.68
   2   1   7   12.66    7.27
   2  -1   7   12.44    7.28
   2  -1  -7   15.62   12.78
   2   1  -7   16.80   11.90
  -2   1   7   14.44    7.78
  -2  -1   7   10.93    6.60
   2   1   7   14.12    6.53
   2  -1   7   17.71    9.75
   2  -1  -8   27.80    5.54
  -2  -1  -8   24.61   19.90
   2   1  -8   20.07    7.16
  -2   1   8   15.93    7.86
  -2   1  -8   20.19   13.08
  -2  -1   8   12.56    5.94
   2  -1  -8   27.47    5.75
   2   1  -8   24.42    5.59
  -2   1   8   25.97    5.34
   2   1   8   23.13    6.46
   2  -1   8   37.44   18.69
   2  -1  -9  114.69    8.54
  -2  -1  -9   84.27    7.48
   2   1  -9   94.90   12.89
  -2   1  -9   71.33   11.69
  -2   1   9   62.57    3.83
  -2  -1   9   76.38    4.25
   2  -1  -9  142.92   24.16
   2   1  -9  137.86    8.70
   2   1   9  121.53    7.89
   2  -1   9  133.59    8.69
   2  -1 -10   23.71   14.62
  -2  -1 -10   22.08   16.31
   2   1 -10   20.27    8.17
  -2   1 -10   16.70   10.33
  -2   1  10    6.08    5.43
  -2  -1  10   13.38    7.45
   2  -1 -10   25.87   16.50
   2   1 -10   33.22   19.26
   2   1  10   32.26   17.54
   2  -1  10   29.58   23.86
   2  -1 -11   64.14    6.08
  -2  -1 -11   52.60    6.49
   2   1 -11   62.76    9.44
  -2   1 -11   49.49    8.07
   2  -1 -11   86.37    7.07
   2   1 -11   79.01    6.69
   2   1  11   81.86    9.34
   2  -1  11   77.32    9.06
   2  -1 -12    5.08    4.44
  -2  -1 -12    7.24    5.06
   2   1 -12    7.74    6.30
  -2   1 -12    6.49    4.35
   2  -1 -12    7.22    5.18
   2   1 -12    6.09    2.55
   2   1  12    7.90    4.66
   2  -1  12   12.31    7.73
   2  -1 -13    1.14    2.75
  -2  -1 -13    1.44    2.46
   2   1 -13    4.67    5.12
  -2   1 -13   -0.24    3.85
   2  -1 -13    1.82    3.68
   2   1 -13    5.13    5.59
   2   1  13    3.02    4.15
   2  -1  13   -0.70    7.38
   2  -1 -14    0.78    5.08
  -2  -1 -14    3.15    4.88
   2   1 -14    0.70    3.63
  -2   1 -14    2.09    3.93
   2  -1 -14    3.73    6.59
   2   1 -14    3.26    4.36
   2   1  14    1.90    4.33
   2  -1  14    0.92    4.79
   2  -1 -15   48.66    6.94
   2   1 -15   42.12   12.63
  -2  -1 -15   44.87    8.87
  -2   1 -15   39.35   11.03
   2   1 -15   60.20    9.17
   2   1  15   57.59   29.92
   2  -1  15   65.24   15.41
  -2   1  15   65.20   29.73
   2  -1 -16   18.48   14.15
   2   1 -16   16.67   12.32
  -2  -1 -16   21.39   13.75
  -2   1 -16   15.46   13.82
   2   1 -16   21.40   16.22
   2   1  16   22.54   18.89
   2  -1  16   20.10   11.50
  -2   1  16   26.31   20.00
   2  -1 -17   42.51   12.07
  -2  -1 -17   45.00   22.50
   2   1 -17   35.95   15.54
  -2   1 -17   40.70    9.33
   2   1 -17   50.69   20.69
   2   1  17   52.60   29.84
   2  -1  17   44.16   17.65
  -2   1  17   46.41   23.70
   2  -1 -18   28.99    5.94
   2   1 -18    7.60    7.69
  -2  -1 -18   11.84    7.37
  -2   1 -18   10.33    6.44
   2   1  18   15.64    8.14
   2  -1  18    7.93    8.09
  -2   1  18   12.69   10.78
  -2  -1  18   15.50    6.30
   2  -1 -19   33.02   24.74
  -2  -1 -19   34.23   27.13
   2   1 -19   32.85   22.46
  -2   1 -19   30.57   24.16
   2   1  19   41.34   17.45
   2  -1  19   71.78   31.67
  -2   1  19   44.79   22.20
  -2  -1  19   46.46   22.27
   2  -1 -20    7.22    8.53
  -2  -1 -20    7.88    8.34
   2   1 -20    9.69    7.40
  -2   1 -20    5.93    5.34
   2   1  20    6.68    5.88
   2  -1  20   10.67    9.31
  -2   1  20    9.86    9.93
  -2  -1  20   14.43   10.30
   2  -1 -21    2.54    7.55
  -2  -1 -21    3.65    6.22
   2   1 -21    4.79    2.76
  -2   1 -21    3.89    6.23
   2   1  21    9.39    6.50
   2  -1  21    4.67    3.10
  -2   1  21    6.18    5.38
  -2  -1  21    8.76    8.14
  -2  -1 -22   13.19   11.32
  -2   1 -22   13.91   10.48
   2   1  22   18.24   11.28
   2  -1  22   17.65   14.79
  -2   1  22   11.91   10.06
  -2  -1  22   11.87   18.02
  -3  -1   0    2.18    2.88
   3   1   0    3.04    2.44
  -3   1   0    4.43    2.97
   3  -1   0    1.47    1.86
   3   1   0    4.35    5.53
  -3  -1   0    2.43    1.66
   3  -1   0    4.41    2.20
  -3   1   0    2.95    2.57
  -3  -1   1  474.46    9.40
   3   1  -1  446.39    9.31
   3   1   1  406.07    9.13
  -3   1  -1  378.00    8.88
   3  -1   1  362.22    8.80
  -3   1   1  496.71   10.20
   3  -1  -1  487.24    9.37
   3   1  -1  479.03   10.94
  -3  -1   1  458.47   10.35
   3  -1  -1  324.63    7.63
  -3   1   1  272.89    7.24
   3   1   1  264.07    8.05
  -3  -1  -1  282.91    7.77
   3  -1   1  486.97   14.31
  -3   1  -1  489.49   11.28
   3   1  -2   75.79    9.04
  -3  -1  -2   63.02    7.92
   3   1   2   60.33    4.52
  -3   1  -2   52.85    8.72
   3  -1   2   50.04   10.70
  -3   1   2   78.18    8.71
   3  -1  -2   76.75    8.35
   3   1  -2   81.08   10.97
   3  -1  -2   77.53   10.98
  -3  -1   2   76.07    8.97
  -3   1   2   71.57    8.17
   3   1   2   65.34    5.99
  -3  -1  -2   62.52   12.98
   3  -1   2   80.66    9.63
  -3   1  -2   74.05    8.70
  -3  -1  -3  268.08    7.90
   3   1   3  299.65   10.35
  -3   1  -3  231.64    7.90
   3  -1   3  227.73    7.24
  -3  -1   3  426.06    7.43
  -3   1   3  454.56    8.67
   3  -1  -3  404.15    8.20
   3  -1  -3  446.61    9.23
   3   1  -3  434.20   10.01
  -3  -1   3  437.02   10.05
  -3   1   3  454.56    9.35
   3   1   3  395.37    9.86
  -3  -1  -3  388.20    9.47
   3  -1   3  439.10   10.28
  -3   1  -3  448.01   10.22
  -3   1   4  289.20    6.12
  -3  -1  -4  224.66    7.95
   3   1  -4  220.06    4.72
  -3   1  -4  144.92    6.34
   3  -1   4  166.64   10.60
  -3  -1   4  306.50    5.82
  -3   1   4  357.41    7.29
   3  -1  -4  377.21    8.71
   3   1  -4  378.24   12.12
  -3   1   4  370.05    8.04
  -3  -1   4  370.16    9.16
   3   1   4  326.63    8.82
  -3  -1  -4  323.37    8.39
   3  -1   4  369.95   11.94
  -3   1  -4  357.04    9.25
  -3  -1  -5  233.99    8.27
   3   1  -5  250.05    5.58
   3   1   5  226.56    7.39
  -3   1  -5  188.39    7.08
   3  -1   5  168.19   10.85
  -3  -1   5  277.09    5.84
  -3   1   5  352.86    7.62
   3  -1   5  398.78   10.02
   3  -1  -5  389.81   11.77
   3   1  -5  438.27   11.20
  -3  -1   5  375.11    9.66
  -3   1   5  394.54    8.78
   3   1   5  357.28    9.52
   3  -1   5  375.16    9.86
  -3  -1  -5  355.95    9.38
   3  -1  -6   94.74    8.65
  -3   1   6   60.13    5.39
  -3  -1  -6   64.83    6.58
   3   1  -6   69.34    7.25
   3   1   6   60.91    8.37
  -3   1  -6   37.62    6.58
   3  -1   6   45.94    5.85
  -3  -1   6   66.00    5.59
   3  -1   6   96.05    8.66
   3  -1  -6  102.45    8.91
   3   1  -6  103.14   11.98
  -3   1   6  102.67    9.22
  -3  -1   6  107.18    9.48
   3   1   6   98.79    9.15
   3  -1   6  104.20    9.62
  -3  -1  -6   93.66   10.61
   3  -1  -7  161.81   12.68
  -3  -1  -7  108.35   11.01
   3   1  -7  123.29   10.91
  -3   1   7   91.82   10.58
  -3   1  -7   72.31    8.21
  -3  -1   7  102.81    8.31
   3  -1  -7  169.00   14.20
   3   1  -7  167.24   23.45
  -3   1   7  163.14   13.14
  -3  -1   7  172.51   13.97
   3   1   7  158.54   18.47
   3  -1   7  167.34   14.23
  -3  -1  -7  162.42   13.44
   3  -1  -8   70.15   12.20
  -3  -1  -8   55.28    8.61
   3   1  -8   68.23    8.48
  -3   1   8   39.75    3.70
  -3   1  -8   37.91    6.68
  -3  -1   8   44.84    3.49
   3  -1  -8   79.58   14.15
   3   1  -8   84.30   12.12
  -3   1   8   81.38    4.66
   3   1   8   73.98   13.34
   3  -1   8   80.26    8.10
   3  -1  -9  413.70   45.75
   3   1  -9  368.12   41.21
  -3  -1  -9  300.38   34.22
  -3   1  -9  226.14   26.24
  -3   1   9  206.18   22.99
  -3  -1   9  270.43   29.85
   3  -1  -9  464.84   52.39
   3   1  -9  444.26   49.63
   3   1   9  431.76   48.31
   3  -1   9  436.92   48.64
   3  -1 -10  564.93   14.75
  -3  -1 -10  420.18   14.95
   3   1 -10  482.45   15.37
  -3   1 -10  326.73   24.87
  -3   1  10  277.32   20.23
  -3  -1  10  376.48    6.29
   3  -1 -10  632.04   15.81
   3   1 -10  633.76   18.47
   3   1  10  604.29   13.91
   3  -1  10  619.62   45.04
   3  -1 -11  106.81   17.41
   3   1 -11  101.07   10.42
  -3  -1 -11   84.80    9.45
  -3   1 -11   74.39    8.65
  -3   1  11   57.63    4.50
  -3  -1  11   70.39    3.49
   3  -1 -11  123.59    8.26
   3   1 -11  130.51   17.25
   3   1  11  108.57   35.39
   3  -1  11  116.39   12.70
   3  -1 -12   43.06   12.78
   3   1 -12   42.09    6.33
  -3  -1 -12   33.01    5.11
  -3   1 -12   28.25   19.29
   3  -1 -12   47.68    6.28
   3   1 -12   49.36   19.22
   3   1  12   52.45   12.55
   3  -1  12   47.77    7.56
   3  -1 -13  179.15   17.47
   3   1 -13  169.59   14.13
  -3  -1 -13  148.34   13.46
  -3   1 -13  120.07   11.66
   3  -1 -13  208.59   19.44
   3   1 -13  216.96   18.31
   3   1  13  184.23   16.97
   3  -1  13  212.13   19.23
   3  -1 -14   90.12   15.00
  -3  -1 -14   67.97   16.99
   3   1 -14   85.06   10.74
  -3   1 -14   57.95    9.69
   3  -1 -14   97.53   12.53
   3   1 -14  107.85   14.05
   3   1  14  106.17   24.01
   3  -1  14  103.83   14.78
   3  -1 -15   14.67    8.30
  -3  -1 -15   13.63    8.78
   3   1 -15   14.12   10.62
  -3   1 -15   11.84    6.85
   3  -1 -15   11.15    8.27
   3   1 -15    8.48   13.39
   3   1  15   16.93   13.39
   3  -1  15   16.75   11.99
   3  -1 -16   23.86   15.60
   3   1 -16   19.27   14.94
  -3  -1 -16   20.97   15.81
  -3   1 -16   15.47    9.52
   3   1 -16   24.24   18.34
   3   1  16   25.30   19.75
   3  -1  16   31.03   15.85
   3  -1 -17   43.36   18.01
   3   1 -17   38.79   16.21
  -3  -1 -17   31.33   25.24
  -3   1 -17   36.66    8.38
   3   1 -17   41.46   19.84
   3   1  17   46.66   29.43
   3  -1  17   46.56   22.29
  -3   1  17   49.52   24.84
   3  -1 -18    3.69    7.89
  -3  -1 -18   -0.78    6.43
   3   1 -18    2.80    6.02
  -3   1 -18    2.23    4.23
   3   1 -18   -1.15    4.87
   3   1  18    8.22    5.56
   3  -1  18   -0.40    8.20
  -3   1  18   -0.95    5.68
   3  -1 -19   14.65   12.30
   3   1 -19   16.69   13.03
  -3  -1 -19   15.38   10.35
  -3   1 -19   15.64   14.10
   3   1  19   20.71   14.02
   3  -1  19   26.27   15.82
  -3   1  19   24.58   29.52
   3  -1 -20   -1.08    4.86
   3   1 -20    2.33    4.57
  -3  -1 -20    2.42    7.18
  -3   1 -20    1.59    7.20
   3   1  20    3.27    7.23
   3  -1  20   -0.72    9.62
  -3   1  20    1.99    7.13
  -3  -1  20    2.90    8.80
  -3  -1 -21   31.22   21.19
  -3   1 -21   27.72   22.11
   3   1  21   36.62   22.36
   3  -1  21   35.13   28.51
  -3   1  21   41.92   19.57
  -3  -1  21   42.96    9.98
  -3  -1 -22   17.48   10.49
  -3   1 -22   16.11   18.46
   3   1  22   22.93   11.91
   3  -1  22   24.24   17.79
  -3   1  22   22.17   22.38
  -3  -1  22   32.67   14.84
  -4  -1   0  154.87    6.43
   4   1   0  164.95    4.89
  -4   1   0  157.12    7.28
   4  -1   0  155.21    6.54
   4   1   0  121.56    6.97
  -4  -1   0  122.36    5.22
   4  -1   0  125.77    5.02
  -4   1   0  135.34    6.27
  -4  -1   1    1.36    1.28
  -4  -1  -1    1.32    1.79
   4   1   1    2.28    3.10
   4   1  -1    1.28    1.91
  -4   1  -1    1.77    2.21
   4  -1   1    0.39    1.04
  -4   1   1    1.12    1.84
   4  -1  -1    0.69    2.13
   4   1  -1   -1.18    4.18
   4  -1  -1    0.61    1.30
  -4  -1   1    1.65    2.19
   4   1   1   -1.79    3.71
  -4   1   1   -0.73    3.46
  -4  -1  -1   -0.31    3.55
   4  -1   1    1.53    2.82
  -4   1  -1    1.05    1.77
  -4  -1  -2   15.86   12.92
   4   1  -2   17.45    4.70
   4   1   2   15.56    3.57
  -4   1  -2   15.74   11.06
   4  -1   2   13.10    7.71
  -4   1   2   19.61    3.48
   4  -1  -2   20.31    3.29
   4   1  -2   18.50    3.00
   4   1  -2   22.89   12.51
   4  -1  -2   17.32    4.82
  -4  -1   2   20.19    3.89
  -4   1   2   16.67    5.50
   4   1   2   15.46   10.49
  -4  -1  -2   15.69   11.03
   4  -1   2   24.19    4.92
  -4   1  -2   22.58    9.71
  -4  -1  -3   56.58    5.45
   4   1   3   46.87    6.28
  -4   1  -3   37.28   10.77
   4  -1   3   35.45    7.29
  -4   1   3   74.08    7.79
   4  -1  -3   69.69    7.59
   4  -1  -3   77.52    8.67
   4   1  -3   73.60    9.08
  -4  -1   3   73.81    8.71
  -4   1   3   72.55    7.95
   4   1   3   62.17    7.51
  -4  -1  -3   63.90    7.86
   4  -1   3   71.84    8.49
  -4   1  -3   71.99    8.47
  -4   1   4  389.79    8.14
  -4  -1  -4  246.02    9.25
   4   1   4  281.78   13.29
  -4   1  -4  240.46    7.68
   4  -1   4  235.97    6.83
  -4   1   4  464.78    8.82
   4  -1  -4  472.40   12.68
   4   1  -4  467.25   11.27
  -4  -1   4  444.84   10.07
  -4   1   4  457.47    9.59
   4   1   4  418.06   10.64
   4  -1   4  484.84   11.67
  -4  -1  -4  416.18   10.22
  -4   1  -4  438.91   10.62
  -4   1   5   27.05    4.30
   4   1  -5   26.57    3.29
  -4  -1  -5   17.02   17.52
   4   1   5   21.91    6.14
  -4   1  -5   19.39   11.72
   4  -1   5   17.09    3.56
  -4  -1   5   30.43    3.40
  -4   1   5   37.31    6.10
   4  -1  -5   37.32    5.95
   4   1  -5   39.38    5.87
  -4  -1   5   32.08    5.38
  -4   1   5   36.92    5.06
   4   1   5   39.93   12.61
  -4  -1  -5   28.81    4.59
   4  -1   5   40.17   19.88
  -4   1  -5   34.97   12.23
  -4   1   6  625.32   11.84
  -4   1  -6  560.53   13.89
  -4  -1   6  776.39   13.49
  -4   1   6  935.34   17.32
   4  -1  -6 1026.62   19.58
   4   1  -6  966.97   19.91
  -4   1   6  984.94   18.62
  -4  -1   6 1027.98   20.23
   4   1   6  939.23   19.29
   4  -1   6 1015.42   25.20
  -4  -1  -6  962.73   19.14
   4   1  -7   37.37   15.81
  -4  -1  -7   32.87   20.56
  -4   1   7   22.88    3.56
  -4   1  -7   26.04    7.11
  -4  -1   7   32.18    4.48
  -4   1   7   41.88    5.30
   4  -1  -7   48.06   10.82
   4   1  -7   49.09   10.85
  -4   1   7   43.23    7.52
  -4  -1   7   47.57    6.37
   4   1   7   42.32    8.11
   4  -1   7   46.63    8.76
  -4  -1  -8  597.41   16.11
  -4   1  -8  484.65   22.33
  -4  -1   8  691.77   12.41
   4  -1  -8 1060.27   20.61
   4   1  -8 1054.00   25.48
  -4   1   8 1045.82   19.61
   4   1   8 1017.83   22.25
   4  -1   8 1060.03   27.67
   4  -1  -9  236.68   26.66
   4   1  -9  190.41   21.86
  -4  -1  -9  147.76   18.66
  -4   1   9  109.40   12.41
  -4   1  -9  110.68   14.73
  -4  -1   9  153.76   17.26
   4  -1  -9  246.15   28.06
   4   1  -9  233.50   27.66
   4   1   9  238.56   28.03
   4  -1   9  238.52   27.86
   4  -1 -10  365.96   26.83
   4   1 -10  363.43   27.38
  -4  -1 -10  255.72   20.67
  -4   1 -10  216.59   22.85
  -4   1  10  174.64   13.05
  -4  -1  10  266.43   19.40
   4  -1 -10  383.27   28.52
   4   1 -10  395.34   29.55
   4   1  10  385.88   29.32
   4  -1  10  399.05   33.93
   4  -1 -11   48.52    5.62
   4   1 -11   42.91    4.21
  -4  -1 -11   36.92   12.83
  -4   1 -11   33.62   21.77
  -4   1  11   22.38    8.08
  -4  -1  11   35.27    3.04
   4  -1 -11   53.41    6.35
   4   1 -11   55.60    7.05
   4   1  11   49.19    7.97
   4  -1  11   53.66    5.99
   4  -1 -12   59.26    8.55
   4   1 -12   48.17    6.69
  -4  -1 -12   35.19    8.62
  -4   1 -12   34.92   16.90
  -4   1  12   24.97    3.20
  -4  -1  12   40.10    3.52
   4  -1 -12   59.15   10.68
   4   1 -12   58.31   14.84
   4   1  12   57.98   14.52
   4  -1  12   54.96   11.85
   4  -1 -13  114.98   12.70
   4   1 -13   94.86   15.44
  -4  -1 -13   79.70   17.87
  -4   1 -13   66.97   10.28
   4  -1 -13  123.28   15.17
   4   1 -13  108.13   13.12
   4   1  13  112.51   16.60
   4  -1  13  107.81   24.71
   4  -1 -14  137.58   14.79
   4   1 -14  126.07   13.81
  -4  -1 -14  112.25   14.59
  -4   1 -14  100.49   13.01
   4  -1 -14  157.49   18.31
   4   1 -14  155.38   17.59
   4   1  14  149.94   26.70
   4  -1  14  150.71   18.51
   4  -1 -15   39.49   19.55
   4   1 -15   38.59    8.30
  -4  -1 -15   34.86   25.70
  -4   1 -15   29.19   24.30
   4  -1 -15   46.68   12.38
   4   1 -15   47.43    8.91
   4   1  15   41.84   18.18
   4  -1  15   49.55   33.31
   4  -1 -16    2.87    3.15
   4   1 -16    6.29    3.64
  -4  -1 -16    4.97    3.44
  -4   1 -16    1.06    5.68
   4  -1 -16    0.54    4.46
   4   1 -16    4.32    8.17
   4   1  16    6.60    8.82
   4  -1  16    5.04    6.94
   4  -1 -17  113.97   10.37
   4   1 -17  113.95   10.40
  -4  -1 -17   87.11   22.37
  -4   1 -17   89.62   11.38
   4  -1 -17  115.34   12.34
   4   1 -17  123.55   14.27
   4   1  17  116.92   13.73
   4  -1  17  125.09   31.83
   4  -1 -18   13.92   10.35
   4   1 -18   10.90   11.37
  -4  -1 -18   11.12    8.57
  -4   1 -18    7.39    6.23
   4   1 -18   18.50   11.72
   4  -1  18   11.23   10.42
  -4   1  18   16.61   14.96
   4  -1 -19   31.41   16.86
   4   1 -19   34.71   12.19
  -4  -1 -19   24.36   22.33
  -4   1 -19   21.57   16.80
   4   1 -19   33.11   20.97
   4   1  19   31.47   18.09
   4  -1  19   32.13   33.53
  -4   1  19   39.04   10.06
  -4  -1 -20   34.88   22.70
  -4   1 -20   30.56   27.96
   4   1  20   42.90   28.87
   4  -1  20   45.21   29.05
  -4   1  20   48.60   15.90
  -4  -1 -21   82.91   12.05
  -4   1 -21   78.98   16.98
   4   1  21  102.65   30.65
   4  -1  21  112.01   12.78
  -4   1  21  111.36   11.50
  -4  -1  21  103.78   28.71
  -4  -1 -22   18.51   19.72
  -4   1 -22   21.76   20.58
   4   1  22   29.09   17.90
   4  -1  22   35.74   18.68
  -4   1  22   29.45   23.09
  -4  -1  22   28.33   30.87
  -5  -1   0   -0.52    2.83
   5   1   0   -1.27    3.03
  -5   1   0    0.95    1.39
   5  -1   0   -1.34    2.76
   5   1   0   -2.26    4.95
  -5  -1   0   -2.09    3.87
   5  -1   0   -2.68    3.96
  -5   1   0   -0.70    3.75
  -5  -1   1  241.02    8.32
  -5  -1  -1  196.74    6.23
   5   1   1  214.87    5.92
   5   1  -1  182.71    4.62
  -5   1  -1  202.77    6.94
  -5   1   1  241.66    7.12
   5  -1   1  176.91    5.73
   5  -1  -1  240.03    5.68
   5   1  -1  222.25    8.05
   5  -1  -1  163.35    5.58
  -5  -1   1  205.64    6.92
   5   1   1  166.67    9.64
  -5   1   1  193.00    5.79
   5  -1   1  252.53    7.93
  -5  -1  -1  167.33    6.18
  -5   1  -1  233.51    7.09
  -5  -1   2  246.63    5.06
  -5  -1  -2  157.98    6.39
   5   1   2  192.90    5.74
   5   1  -2  182.50    4.30
  -5   1  -2  163.42    6.64
   5  -1   2  162.81    5.72
  -5   1   2  248.93    5.92
   5  -1  -2  260.89    5.71
   5   1  -2  258.85    8.05
   5  -1  -2  231.31    7.55
  -5  -1   2  247.42    7.46
  -5   1   2  188.14    5.49
   5   1   2  199.08    7.14
   5  -1   2  277.98    8.11
  -5  -1  -2  192.13    6.81
  -5   1  -2  253.51    7.41
  -5  -1  -3  583.44   13.50
   5   1   3  550.21   12.07
  -5   1  -3  545.71   12.55
   5  -1   3  559.70   12.19
  -5   1   3  886.50   15.72
   5  -1  -3  910.88   16.08
   5   1  -3  962.11   21.21
   5  -1  -3  916.03   17.25
  -5  -1   3  932.80   18.36
  -5   1   3  835.55   16.99
   5   1   3  651.91   18.82
   5  -1   3  925.82   18.61
  -5  -1  -3  755.04   15.74
  -5   1  -3  860.72   20.22
  -5  -1  -4   33.21   27.13
   5   1   4   32.32    6.97
  -5   1  -4   34.84    8.10
   5  -1   4   31.88    7.82
  -5   1   4   55.67    6.12
   5  -1  -4   45.37    5.66
   5  -1  -4   57.50    7.13
   5   1  -4   57.90    8.91
  -5  -1   4   56.21    7.29
  -5   1   4   55.17    6.65
   5   1   4   50.80    8.03
  -5  -1  -4   39.53    5.81
   5  -1   4   54.59    7.70
  -5   1  -4   51.14    7.64
  -5   1   5  293.05   21.08
  -5  -1  -5  229.97   18.16
   5   1   5  232.16   21.09
  -5   1  -5  204.16    7.47
   5  -1   5  203.85   18.25
  -5   1   5  394.22    4.55
   5  -1  -5  401.52    7.97
   5   1  -5  381.89   28.50
  -5   1   5  388.00    6.81
  -5  -1   5  382.40    7.66
   5   1   5  349.71   10.38
   5  -1   5  404.62   12.08
  -5  -1  -5  344.31   25.74
  -5   1  -5  380.04   28.62
  -5   1   6   49.51    4.53
  -5  -1  -6   42.50    9.54
  -5   1  -6   48.63   19.11
  -5  -1   6   67.75    5.42
  -5   1   6   75.72    6.17
   5  -1  -6   83.28    8.34
   5   1  -6   76.25    9.19
  -5   1   6   70.86   12.99
  -5  -1   6   74.14    8.85
   5   1   6   79.40   18.91
   5  -1   6   77.04   10.17
   5   1  -7  613.78   10.83
  -5  -1  -7  389.12   12.49
  -5   1   7  373.20   40.83
  -5   1  -7  356.01   16.57
  -5  -1   7  584.81   11.98
  -5   1   7  686.00   12.45
   5  -1  -7  711.31   15.80
   5   1  -7  706.24   25.77
  -5   1   7  693.15   13.77
   5   1   7  578.87   15.10
   5  -1   7  674.09   16.25
   5   1  -8   88.74    5.20
  -5  -1  -8   57.67    8.91
  -5   1  -8   54.76   17.48
  -5  -1   8   75.23    4.26
  -5   1   8   95.98    5.48
   5  -1  -8  106.63    7.04
   5   1  -8  102.10    7.57
  -5   1   8   96.73    4.51
   5   1   8   95.69   17.29
   5  -1   8   97.24   14.62
   5   1  -9  330.42   36.29
  -5  -1  -9  214.06   25.32
  -5   1   9  194.49   21.57
  -5   1  -9  193.66   22.95
  -5  -1   9  284.64   31.27
  -5   1   9  383.88   42.24
   5  -1  -9  397.69   45.80
   5   1  -9  390.05   43.88
   5   1   9  367.64   42.87
   5  -1   9  378.02   42.70
   5   1 -10  134.65   10.48
  -5  -1 -10   98.40   19.11
  -5   1 -10   83.35   10.22
  -5   1  10   85.42    7.07
  -5  -1  10  117.91    9.17
  -5   1  10  151.06   12.95
   5  -1 -10  166.91   18.41
   5   1 -10  164.04   17.75
   5   1  10  157.96   14.84
   5  -1  10  168.39   16.78
   5   1 -11  381.53   30.87
  -5  -1 -11  261.33   25.33
  -5   1 -11  222.38   20.81
  -5   1  11  216.99   17.95
  -5  -1  11  307.85   24.90
  -5   1  11  422.25   34.35
   5  -1 -11  435.12   35.88
   5   1 -11  436.40   36.17
   5   1  11  400.32   33.90
   5  -1  11  410.57   34.69
   5   1 -12   95.26    8.38
  -5  -1 -12   69.41   16.69
  -5   1 -12   55.22    6.98
  -5   1  12   55.39    6.42
  -5  -1  12   72.90    6.12
  -5   1  12  100.38    8.73
   5  -1 -12  110.26   12.56
   5   1 -12  100.74   10.66
   5   1  12   98.72   12.42
   5  -1  12   97.86    9.12
   5   1 -13   46.96    5.36
  -5  -1 -13   42.88   26.99
  -5   1 -13   33.42   11.45
  -5  -1  13   39.81    5.13
   5  -1 -13   62.23   17.12
   5   1 -13   56.88    7.91
   5   1  13   56.50   10.40
   5  -1  13   51.51   11.16
   5   1 -14   49.52    5.78
  -5  -1 -14   40.36   10.16
  -5   1 -14   38.37   27.53
   5  -1 -14   56.01   30.95
   5   1 -14   60.12    8.01
   5   1  14   53.73   10.63
   5  -1  14   58.67   29.53
   5   1 -15   98.50    8.13
  -5  -1 -15   70.43   20.78
  -5   1 -15   67.84   11.31
   5  -1 -15  116.35   11.20
   5   1 -15  121.61   13.06
   5   1  15  111.49   14.16
   5  -1  15  117.57   14.15
   5   1 -16   37.34   14.73
  -5  -1 -16   34.29   26.44
  -5   1 -16   32.48   20.70
   5  -1 -16   45.74   20.33
   5   1 -16   46.81   10.39
   5   1  16   51.95   35.01
   5  -1  16   50.62   14.60
   5   1 -17   99.72    8.87
  -5  -1 -17   71.44   23.92
  -5   1 -17   72.72   27.84
  -5   1  17   98.00   10.57
   5  -1 -17   98.12   24.29
   5   1 -17  113.34   14.48
   5   1  17  101.40   19.21
   5  -1  17  123.08   34.88
   5   1 -18   18.59   14.60
  -5  -1 -18   22.76   17.28
  -5   1 -18   21.11   10.41
   5  -1 -18   29.97   22.21
   5   1 -18   30.56   14.44
   5   1  18   25.96   19.97
   5  -1  18   28.22   11.84
  -5  -1 -19   78.25   15.72
  -5   1 -19   80.89   11.07
   5   1 -19  116.80   13.65
   5   1  19  105.12   25.79
   5  -1  19  126.66   37.45
  -5   1  19  120.95   19.96
  -5  -1 -20   30.41   20.61
  -5   1 -20   27.07   20.93
   5   1 -20   33.09   25.38
   5   1  20   30.04   22.91
   5  -1  20   42.96   17.28
  -5   1  20   35.54   22.60
  -5  -1 -21    2.05    7.19
  -5   1 -21   -0.14    8.61
   5   1  21    6.34    5.76
   5  -1  21    6.29    7.15
  -5   1  21    7.82    4.05
  -6  -1   0    6.49    3.88
   6   1   0    4.73    3.10
  -6   1   0    5.25    3.43
   6  -1   0    5.88    3.11
   6   1   0    4.81    3.57
   6  -1   0    5.49    3.60
  -6  -1   0    5.79    3.32
  -6   1   0    5.58    3.30
  -6  -1   1   43.96    7.92
  -6  -1  -1   51.26    7.01
   6   1   1   45.32    8.27
   6   1  -1   44.49    5.71
  -6   1  -1   45.42    7.00
  -6   1   1   51.97    6.25
   6  -1   1   39.93    5.20
   6  -1  -1   54.13    9.20
   6   1  -1   44.50    6.34
   6  -1  -1   38.89    5.93
  -6  -1   1   41.72    8.69
   6   1   1   52.58   14.04
  -6   1   1   40.54    5.39
   6  -1   1   47.42    6.78
  -6  -1  -1   44.26    5.77
  -6   1  -1   47.64    6.47
  -6  -1   2  153.20    4.74
  -6  -1  -2  117.48    5.60
   6   1   2  127.19    5.55
  -6   1  -2  112.34   11.88
   6   1  -2  116.83    3.99
  -6   1   2  151.99    4.56
   6  -1   2  118.82    5.50
   6  -1  -2  158.93    5.45
   6   1  -2  158.35    7.19
   6  -1  -2  137.72    6.52
  -6  -1   2  146.22    6.13
  -6   1   2  128.47    4.83
   6   1   2  117.66    7.10
   6  -1   2  178.70    7.48
  -6  -1  -2  106.69    7.01
  -6   1  -2  152.99    6.42
  -6  -1  -3   -1.39   20.72
   6   1   3    1.51    1.86
  -6   1  -3    1.20    2.56
   6  -1   3   -1.02    3.55
   6   1  -3    0.01    0.46
  -6   1   3    0.93    1.30
   6  -1  -3   -0.53    1.36
   6   1  -3    1.45    4.72
   6  -1  -3   -0.25    3.55
  -6  -1   3    0.20    2.26
  -6   1   3    1.22    2.38
   6   1   3   -0.70    4.52
   6  -1   3   -0.57    5.05
  -6  -1  -3    0.97    2.07
  -6   1  -3    1.79    3.23
  -6  -1  -4   34.82    9.71
   6   1   4   36.09    5.05
  -6   1  -4   35.01    7.78
   6  -1   4   34.54    7.40
  -6   1   4   50.54    4.29
   6  -1  -4   49.34    4.06
   6   1  -4   48.07    7.56
   6  -1  -4   52.76    6.64
  -6  -1   4   51.99    6.30
  -6   1   4   51.75    5.00
   6   1   4   48.22   15.39
   6  -1   4   53.56   14.97
  -6  -1  -4   42.86    5.66
  -6   1  -4   52.35    8.73
  -6   1   5   75.81    5.92
  -6  -1  -5   66.25    7.56
  -6   1  -5   58.45    6.91
  -6   1   5   95.34    7.39
   6  -1  -5   97.79    8.82
   6   1  -5  103.41   10.34
  -6  -1   5   94.72    8.76
  -6   1   5   88.76   10.81
   6   1   5   87.81   10.13
   6  -1   5   97.62   12.05
  -6   1   6  187.46   20.86
  -6  -1  -6  142.65   17.87
  -6   1  -6  142.86   21.38
  -6   1   6  337.70   40.25
   6  -1  -6  303.38   34.05
   6   1  -6  299.62   34.05
  -6   1   6  299.36   33.38
   6   1   6  248.86   34.04
   6  -1   6  276.92   37.59
  -6  -1  -7  175.47   23.40
  -6   1   7  151.34   16.77
  -6   1  -7  162.85   19.88
  -6   1   7  280.13   30.75
   6  -1  -7  295.06   36.37
   6   1  -7  285.91   32.46
  -6   1   7  290.60   32.42
   6   1   7  262.30   30.36
   6  -1   7  272.29   31.42
  -6  -1  -8  183.04   22.62
  -6   1   8  168.09   18.62
  -6   1  -8  149.29   18.44
  -6  -1   8  290.57   31.74
  -6   1   8  315.74   34.91
  -6  -1   8  305.30   33.33
   6  -1  -8  322.29   36.79
   6   1  -8  320.14   36.01
  -6   1   8  303.48   34.82
   6   1   8  297.68   34.21
   6  -1   8  320.20   37.49
   6   1  -9   20.65    5.73
  -6  -1  -9   13.11    9.80
  -6   1  -9   11.13    7.73
  -6   1   9    8.06    2.57
  -6  -1   9   17.80    4.11
  -6   1   9   20.89    5.47
   6  -1  -9   24.09   15.18
   6   1  -9   25.07   16.34
   6   1   9   22.93   11.86
   6  -1   9   20.42   13.74
   6   1 -10  517.54   41.35
  -6  -1 -10  314.89   27.34
  -6   1 -10  291.84   25.40
  -6   1  10  296.49   24.08
  -6  -1  10  435.89   34.94
  -6   1  10  511.86   41.18
   6  -1 -10  536.50   43.56
   6   1 -10  528.68   46.15
   6   1  10  511.23   42.34
   6  -1  10  521.49   43.43
   6   1 -11  169.37   12.70
  -6  -1 -11  109.20   12.40
  -6   1 -11  100.95   11.64
  -6   1  11   98.87    7.85
  -6  -1  11  144.63   10.65
  -6   1  11  178.43   13.40
   6  -1 -11  190.45   16.60
   6   1 -11  179.69   24.30
   6   1  11  178.14   25.77
   6  -1  11  190.24   17.38
   6   1 -12   59.27    5.91
  -6  -1 -12   37.32   14.65
  -6   1 -12   36.94   22.96
  -6   1  12   32.53    3.15
  -6  -1  12   46.62    2.84
  -6   1  12   58.97    9.52
   6  -1 -12   61.23   13.40
   6   1 -12   67.61    7.64
   6   1  12   75.12   35.82
   6  -1  12   60.18   20.37
   6   1 -13   68.00    7.94
  -6  -1 -13   50.02   24.12
  -6   1 -13   48.36   28.48
  -6   1  13   33.37   10.22
  -6  -1  13   55.90    6.11
  -6   1  13   75.39    8.90
   6  -1 -13   74.99   10.46
   6   1 -13   77.86   15.42
   6   1  13   66.99   22.02
   6  -1  13   85.03   24.62
   6   1 -14    3.12    4.12
  -6  -1 -14    2.93    4.73
  -6   1 -14    1.91    4.35
  -6   1  14    2.39    2.21
   6  -1 -14    2.90    7.13
   6   1 -14    8.11    6.45
   6   1  14    3.30    6.32
   6  -1  14    4.17    6.00
   6   1 -15  305.40   34.30
  -6  -1 -15  186.12   24.51
  -6   1 -15  167.36   22.04
  -6   1  15  267.58   31.02
   6  -1 -15  279.59   33.34
   6   1 -15  287.14   35.11
   6   1  15  264.83   43.95
   6  -1  15  298.00   35.87
   6   1 -16   12.37    8.43
  -6  -1 -16   11.28    8.95
  -6   1 -16   16.53    9.46
  -6   1  16   14.24   11.03
   6  -1 -16   15.39   12.55
   6   1 -16   15.67   10.27
   6   1  16   14.62    8.36
   6  -1  16   22.36   15.02
  -6  -1 -17   25.88   14.97
  -6   1 -17   22.20   15.79
   6  -1 -17   43.50   26.86
   6   1 -17   41.38    9.81
   6   1  17   26.92   14.21
   6  -1  17   36.56   25.04
  -6  -1 -18   49.52   33.91
  -6   1 -18   42.64   26.61
   6  -1 -18   74.45    8.82
   6   1 -18   78.26   16.66
   6   1  18   74.97   32.37
   6  -1  18   83.46   31.88
  -6  -1 -19  129.20   18.88
  -6   1 -19   98.77   15.64
   6  -1 -19  157.19   23.38
   6   1 -19  168.30   23.45
   6   1  19  161.94   39.59
   6  -1  19  163.31   46.54
  -6  -1 -20    4.43    6.64
  -6   1 -20    9.41    9.06
   6   1 -20   13.79    9.18
   6   1  20   10.49    6.96
   6  -1  20   15.05   29.16
  -6   1  20    8.69    7.69
  -6  -1 -21   61.40   29.93
  -6   1 -21   45.62   40.41
   6   1 -21   88.83   10.92
   6  -1  21   78.89   43.35
   6   1  21   94.23   19.09
  -6   1  21   87.09   12.89
  -7   1   0    2.76    1.74
   7   1   0    0.55    1.67
   7  -1   0   -0.12    2.33
   7   1   0    2.06    3.62
   7  -1   0    1.75    3.49
  -7  -1   0    1.59    3.18
  -7   1   0    1.29    2.25
  -7  -1   1  539.42   10.81
  -7  -1  -1  556.58   13.98
   7   1   1  517.70   11.55
  -7   1  -1  516.40   11.71
   7   1  -1  529.76   10.59
  -7   1   1  557.84   11.42
   7  -1  -1  562.77   11.33
   7   1  -1  521.89   15.71
   7  -1  -1  486.75   12.11
   7   1   1  531.78   13.51
  -7  -1   1  515.77   12.31
   7  -1   1  516.51   12.73
  -7   1   1  516.51   11.33
  -7  -1  -1  519.18   12.38
  -7   1  -1  544.97   12.61
  -7  -1   2   99.80    7.81
  -7  -1  -2  100.18   23.95
   7   1   2   89.07    8.23
  -7   1  -2   98.50    9.41
  -7   1   2  101.03    8.34
   7   1  -2   88.75    7.26
   7  -1   2   92.23    8.35
   7  -1  -2  111.29    8.63
   7   1  -2  113.78   15.33
   7  -1  -2   95.83    9.16
  -7  -1   2  108.15    9.30
   7   1   2   83.18   19.73
  -7   1   2   88.08    7.81
   7  -1   2  120.99   11.26
  -7  -1  -2   71.97    7.53
  -7   1  -2  110.90    9.64
  -7  -1  -3  596.47   13.61
   7   1   3  594.76   13.11
  -7   1   3  712.24   12.98
   7  -1   3  577.97   12.86
   7  -1  -3  767.13   19.18
   7  -1  -3  742.72   18.16
   7   1  -3  769.85   19.06
  -7  -1   3  754.45   16.05
  -7   1   3  643.62   13.25
   7   1   3  674.73   20.01
  -7  -1  -4  116.99   31.84
  -7   1  -4  108.68   10.26
  -7   1   4  134.82   10.22
   7  -1  -4  159.38   12.68
   7  -1  -4  168.48   15.93
   7   1  -4  196.68   25.02
  -7  -1   4  151.08   13.11
  -7   1   4  142.35   11.85
   7   1   4  133.59   13.16
   7  -1   4  166.84   14.87
  -7  -1  -5  608.27   21.16
  -7   1  -5  589.22   14.96
  -7   1   5  849.18   13.92
   7  -1  -5  773.91   12.59
   7  -1  -5  952.89   25.89
   7   1  -5  931.75   18.89
  -7   1   5  895.07   17.40
   7   1   5  835.56   18.75
   7  -1   5  899.44   25.17
  -7   1   6   28.86    3.21
  -7  -1  -6   26.42   17.09
  -7   1  -6   27.79   19.58
  -7   1   6   35.55    6.09
   7  -1  -6   44.19   13.40
   7   1  -6   45.36   13.48
  -7   1   6   34.58    8.86
   7   1   6   46.82   24.32
   7  -1   6   47.59   21.48
  -7  -1  -7  482.98   14.25
  -7   1  -7  515.29   19.05
  -7   1   7  850.82   13.95
   7  -1  -7  868.29   18.34
   7   1  -7  847.74   23.22
   7   1   7  775.71   20.24
   7  -1   7  843.65   19.80
  -7  -1  -8   44.38   24.76
  -7   1   8   38.07    2.20
  -7   1  -8   41.99   11.69
  -7   1   8   69.32    2.64
   7  -1  -8   74.16    6.58
   7   1  -8   65.71   14.21
   7   1   8   63.14   16.48
   7  -1   8   65.96    8.50
  -7  -1  -9  493.31   15.82
  -7   1  -9  492.07   21.55
  -7   1   9  509.62   10.98
  -7  -1   9  898.38   16.66
  -7   1   9  858.45   17.24
   7  -1  -9  791.30   28.16
   7   1  -9  867.62   27.10
   7   1   9  799.32   21.14
   7  -1   9  899.99   31.07
  -7  -1 -10   80.96   27.04
  -7   1 -10   73.00    9.24
  -7   1  10   76.23    3.07
  -7  -1  10  126.71    3.17
  -7   1  10  131.32    5.81
  -7  -1  10  132.62    3.08
   7  -1 -10  139.80    8.17
   7   1 -10  128.83   17.89
   7   1  10  128.19   10.21
   7  -1  10  109.75   10.56
  -7  -1 -11  199.98   18.12
  -7   1 -11  195.89   20.66
  -7   1  11  190.34   13.69
  -7  -1  11  299.78   20.70
  -7   1  11  335.93   23.46
  -7  -1  11  357.37   24.65
   7  -1 -11  349.74   26.24
   7   1 -11  338.13   26.72
   7   1  11  339.87   26.56
   7  -1  11  333.69   36.09
  -7  -1 -12   44.16   14.66
  -7   1 -12   47.97   16.81
  -7   1  12   46.99    5.71
  -7  -1  12   71.60    7.38
  -7   1  12   79.31   10.76
  -7  -1  12   71.79    8.98
   7  -1 -12   82.47   11.78
   7   1 -12   84.21   16.03
   7   1  12   82.57   22.47
   7  -1  12   82.53   12.08
  -7  -1 -13  178.78   21.33
  -7   1 -13  160.32   18.99
  -7   1  13  284.38   28.61
  -7  -1  13  285.26   27.54
   7  -1 -13  284.06   31.03
   7   1 -13  291.91   33.05
   7   1  13  291.72   30.53
   7  -1  13  283.98   30.10
  -7  -1 -14   79.39   27.53
  -7   1 -14   63.35   12.27
  -7   1  14  106.46    7.80
  -7  -1  14  102.34    6.90
   7  -1 -14  108.67   10.26
   7   1 -14  112.50   11.00
   7   1  14  100.76   13.11
   7  -1  14  109.06   14.68
  -7  -1 -15  109.41   15.80
  -7   1 -15  106.52   15.12
  -7   1  15  170.20    6.29
   7  -1 -15  176.61   20.83
   7   1 -15  184.57   21.74
   7   1  15  159.80   24.61
   7  -1  15  192.83   37.51
  -7  -1 -16   20.01   16.07
  -7   1 -16   15.27   10.98
   7  -1 -16   27.08   16.64
   7   1 -16   22.07   15.27
   7   1  16   24.92   10.42
   7  -1  16   21.84   16.13
  -7  -1 -17  129.22   31.87
  -7   1 -17  126.27   18.55
   7  -1 -17  215.54   28.75
   7   1 -17  232.70   30.26
   7   1  17  208.32   34.58
   7  -1  17  212.22   43.48
  -7  -1 -18    7.61    6.18
  -7   1 -18    2.33   10.02
   7  -1 -18   10.53    7.60
   7   1 -18   10.13    8.76
   7   1  18    5.39    5.80
   7  -1  18   12.52   24.32
  -7  -1 -19   45.76   26.57
  -7   1 -19   40.46   10.79
   7  -1 -19   60.97   18.69
   7   1 -19   65.50   28.40
   7   1  19   65.19   13.98
   7  -1  19   70.56   14.14
  -7  -1 -20    6.96   10.06
  -7   1 -20    9.37    7.25
   7  -1 -20    5.12    8.15
   7   1 -20    4.60    6.00
   7  -1  20    9.30    9.87
  -7  -1 -21   30.27   21.32
  -7   1 -21   25.74   15.55
   7   1 -21   34.99   31.70
   7   1  21   32.35   30.40
   7  -1  21   32.85   27.21
  -7   1  21   35.03   14.49
  -8   1   0  317.29    9.13
   8   1   0  305.76    8.13
   8  -1   0  305.12   10.86
   8   1   0  323.01   11.66
   8  -1   0  308.12   10.15
  -8   1   0  278.07    8.08
  -8  -1   1   19.60    2.96
  -8  -1  -1   29.26   12.33
  -8   1  -1   24.55    7.07
  -8   1   1   24.84    3.91
   8   1   1   23.64    4.14
   8   1  -1   26.30    4.91
   8  -1   1   26.31    4.79
   8  -1  -1   35.99   22.74
   8   1  -1   27.93   22.01
   8  -1  -1   39.75   23.35
   8   1   1   28.87   22.24
   8  -1   1   31.06   17.33
  -8   1   1   26.48    3.91
  -8   1  -1   24.38   12.57
  -8  -1   2   59.36    6.99
  -8  -1  -2   51.49    6.98
  -8   1  -2   59.59    6.78
  -8   1   2   60.51    5.59
   8   1   2   60.52   13.67
   8   1  -2   58.74    6.01
   8  -1   2   60.03    9.02
   8  -1  -2  126.36   38.27
   8  -1  -2   99.81   41.62
   8   1   2   63.90    9.03
   8  -1   2   63.28   19.28
  -8   1   2   58.22    5.88
  -8  -1   3   17.18    5.74
  -8  -1  -3   10.19    9.37
  -8   1  -3   16.15    9.55
   8   1   3   13.06    7.23
  -8   1   3   16.97    4.97
   8   1  -3   13.54    8.59
   8   1  -3   44.87   38.68
   8  -1  -3   22.39   25.80
  -8   1   3   14.95    7.19
   8   1   3   16.75   11.12
   8  -1   3   24.60   12.44
  -8  -1  -4  363.85   12.79
  -8   1  -4  375.77   11.48
  -8   1   4  379.98    4.93
   8  -1  -4  457.94   50.87
   8   1  -4  476.47   25.64
   8  -1  -4  466.12    9.51
  -8   1   4  419.44   46.21
   8   1   4  413.49   46.29
   8  -1   4  463.04   51.64
  -8  -1  -5   65.71   48.64
  -8   1  -5   63.45    6.27
  -8   1   5   76.56    2.36
   8  -1  -5   84.89    2.33
   8  -1  -5   95.14    6.19
   8   1  -5   91.14    6.66
  -8   1   5   85.56    6.38
   8   1   5   87.86    8.19
   8  -1   5   91.10    7.98
  -8   1   6  150.63   16.64
  -8  -1  -6  131.34   16.94
  -8   1  -6  142.94   17.78
  -8   1   6  180.55   19.79
   8   1  -6  204.43   31.35
   8  -1  -6  219.08   26.59
  -8   1   6  197.88   22.55
   8   1   6  194.41   27.90
   8  -1   6  207.06   24.80
  -8  -1  -7   16.22   12.05
  -8   1   7   12.58    2.72
  -8   1  -7   12.22    8.55
  -8   1   7   15.87    2.73
   8  -1  -7   24.18   13.04
   8   1  -7   22.46   14.75
   8   1   7   18.94   12.58
   8  -1   7   18.20   12.76
  -8  -1  -8  514.53   29.87
  -8   1  -8  512.62   29.03
  -8   1   8  509.76   10.05
  -8   1   8  801.87   15.48
   8  -1  -8  860.07   23.22
   8   1  -8  845.22   26.36
   8   1   8  776.14   21.47
   8  -1   8  816.38   25.34
  -8  -1  -9  202.18   19.67
  -8   1  -9  215.60   20.89
  -8   1   9  203.06   16.22
  -8   1   9  339.03   26.87
   8  -1  -9  346.85   29.12
   8   1  -9  338.47   28.75
   8   1   9  312.99   27.74
   8  -1   9  324.46   28.62
  -8  -1 -10  106.24   12.38
  -8   1 -10  107.61   12.31
  -8   1  10   97.19    7.34
  -8   1  10  151.84   10.87
   8  -1 -10  153.17   13.99
   8   1 -10  158.68   14.06
   8   1  10  159.12   16.06
   8  -1  10  151.55   16.41
  -8  -1 -11   67.15   22.36
  -8   1 -11   61.00   15.91
  -8   1  11   63.01    6.46
  -8   1  11   98.30    9.87
   8  -1 -11   98.01   12.13
   8   1 -11  101.76   20.11
   8   1  11   86.31   19.95
   8  -1  11   97.14   31.06
  -8  -1 -12  122.27   15.15
  -8   1 -12  123.57   14.97
  -8   1  12  194.03   18.88
   8  -1 -12  201.42   21.87
   8   1 -12  191.49   29.22
   8   1  12  177.09   22.09
   8  -1  12  196.73   23.85
  -8  -1 -13  240.25   38.26
  -8   1 -13  248.72   26.06
  -8   1  13  417.34   39.45
   8  -1 -13  390.17   39.63
   8   1 -13  419.96   42.97
   8   1  13  395.64   40.49
   8  -1  13  406.40   42.20
  -8  -1 -14   21.88   18.58
  -8   1 -14   24.95   16.84
   8  -1 -14   32.06   23.64
   8   1 -14   33.60   23.25
   8   1  14   30.82   23.57
   8  -1  14   38.02   24.20
  -8  -1 -15  110.98   17.29
  -8   1 -15  120.74   21.54
   8  -1 -15  170.13   32.79
   8   1 -15  182.12   24.36
   8   1  15  173.15   49.66
   8  -1  15  179.58   24.89
  -8  -1 -16   36.23   28.76
  -8   1 -16   38.76   27.04
   8  -1 -16   56.86   17.47
   8   1 -16   60.40   14.73
   8   1  16   65.85   17.20
   8  -1  16   66.92   20.59
  -8  -1 -17  209.19   29.41
  -8   1 -17  203.97   30.92
   8  -1 -17  328.40   42.78
   8   1 -17  332.80   43.76
   8   1  17  320.77   43.56
   8  -1  17  329.09   43.95
  -8  -1 -18    4.84    7.90
  -8   1 -18    8.25    7.87
   8  -1 -18   13.92   10.56
   8   1 -18   14.87   12.49
   8   1  18   17.40   10.96
   8  -1  18   11.59   12.53
  -8  -1 -19   51.40   10.44
  -8   1 -19   46.34   31.90
   8  -1 -19   85.48    9.79
   8   1 -19   93.47   11.10
   8   1  19   89.25   20.48
   8  -1  19   84.26   19.80
  -8  -1 -20   46.79   12.05
  -8   1 -20   45.56   13.65
   8  -1 -20   67.79    9.11
   8   1 -20   67.93   31.95
   8   1  20   64.13   37.82
   8  -1  20   57.37   12.74
  -9  -1   0   -1.27    5.11
  -9   1   0   -0.89    2.92
   9   1   0    0.83    1.95
   9  -1   0   -2.21    5.18
   9   1   0   -3.22    6.24
   9  -1   0    0.82    2.72
  -9  -1   1 1061.55   20.28
  -9  -1  -1 1057.02   24.79
  -9   1  -1  962.33   23.66
  -9   1   1 1016.17   20.34
   9   1   1 1022.73   18.70
   9   1  -1 1052.31   18.31
   9   1  -1  929.46   22.15
   9  -1  -1 1099.32   28.19
   9   1   1 1087.76   22.73
   9  -1   1 1038.10   21.34
  -9  -1   2   88.35    3.82
  -9  -1  -2   92.89   23.18
  -9   1  -2   77.78    7.10
  -9   1   2   75.67   11.08
   9   1   2   77.62   10.99
   9   1  -2   79.75    5.33
   9  -1  -2   78.31    5.06
   9   1  -2   64.55   17.80
   9  -1  -2   77.63    7.32
   9   1   2   78.13    8.44
   9  -1   2   81.34    7.35
  -9   1   2   72.31    4.38
  -9  -1   3 1007.71   16.71
  -9  -1  -3  852.42   20.11
   9   1  -3 1008.97   16.74
   9   1  -3 1058.82   22.17
   9   1   3  952.70   25.98
  -9  -1  -4    7.14    9.51
  -9   1  -4   16.05   12.07
  -9   1   4    7.78    4.01
   9   1  -4   14.70    6.18
   9  -1  -4   15.70    6.88
   9   1  -4   18.34   11.61
   9  -1  -4   18.00   11.55
   9   1   4   16.18    9.01
   9  -1   4   16.31    7.73
  -9  -1  -5  719.80   18.68
  -9   1  -5  820.30   21.21
  -9   1   5  740.23   14.56
   9  -1  -5  981.22   18.94
   9  -1  -5 1066.24   44.70
   9   1  -5 1064.47   28.51
   9   1   5  930.94   23.42
   9  -1   5 1060.71   28.29
  -9   1   6    3.09    1.74
  -9  -1  -6    1.24    3.52
  -9   1  -6    4.40    3.36
  -9   1   6    1.35    0.83
   9   1  -6    6.28    4.78
   9  -1  -6    2.92    4.62
   9   1   6    4.40    4.07
   9  -1   6    6.29    4.02
  -9  -1  -7  781.95   22.03
  -9   1  -7  812.39   25.24
   9  -1  -7 1089.79   29.51
   9   1  -7 1154.49   27.13
   9   1   7 1057.58   26.75
   9  -1   7 1147.20   31.67
  -9  -1  -8   86.62   33.53
  -9   1  -8   88.33   10.20
   9  -1  -8  141.34    9.13
   9   1  -8  138.52    8.73
   9   1   8  124.45   16.86
   9  -1   8  125.17   17.22
  -9  -1  -9  418.83   19.61
  -9   1  -9  464.41   22.92
   9  -1  -9  666.25   32.23
   9   1  -9  662.88   28.73
   9   1   9  632.74   30.21
   9  -1   9  634.39   28.57
  -9  -1 -10   56.47   31.28
  -9   1 -10   53.09   30.10
   9  -1 -10   73.14   17.30
   9   1 -10   82.69   13.95
   9   1  10   71.48   12.82
   9  -1  10   79.18   14.04
  -9  -1 -11  332.38   28.66
  -9   1 -11  354.18   41.63
  -9   1  11  442.36   34.21
  -9   1  11  510.00   39.39
   9  -1 -11  549.32   48.91
   9   1 -11  525.33   42.49
   9   1  11  516.79   42.91
   9  -1  11  528.66   44.45
  -9  -1 -12   83.73   13.52
  -9   1 -12   76.75   10.82
   9  -1 -12  134.52   18.53
   9   1 -12  139.14   17.09
   9   1  12  135.00   18.47
   9  -1  12  138.00   29.05
  -9  -1 -13  304.57   35.48
  -9   1 -13  313.41   36.96
   9  -1 -13  508.42   49.69
   9   1 -13  498.40   48.68
   9   1  13  477.58   48.00
   9  -1  13  511.39   51.15
  -9  -1 -14   27.21   22.11
  -9   1 -14   23.17   21.67
   9  -1 -14   33.63   10.52
   9   1 -14   34.70   27.00
   9   1  14   33.49   19.86
   9  -1  14   36.58   17.93
  -9  -1 -15  242.83   30.05
  -9   1 -15  261.90   31.77
   9  -1 -15  401.71   45.01
   9   1 -15  406.52   49.37
   9   1  15  387.82   44.46
   9  -1  15  384.94   44.58
  -9  -1 -16  103.31   17.13
  -9   1 -16  105.83   29.70
   9  -1 -16  168.12   22.27
   9   1 -16  176.65   24.74
   9   1  16  142.76   32.47
   9  -1  16  154.38   39.14
  -9  -1 -17   80.45   30.81
  -9   1 -17   89.62   33.77
   9  -1 -17  120.93   12.78
   9   1 -17  117.97   12.73
   9   1  17  123.84   24.73
   9  -1  17  112.40   15.09
  -9  -1 -18   93.89   23.99
  -9   1 -18  110.27   17.41
   9  -1 -18  166.98   22.54
   9   1 -18  157.52   20.06
   9   1  18  156.69   48.25
   9  -1  18  150.12   22.37
  -9  -1 -19   54.19   35.09
  -9   1 -19   70.73   16.44
   9  -1 -19  101.03    9.64
   9   1 -19  102.05   22.53
   9   1  19  103.83   17.72
   9  -1  19   95.54   35.36
  -9  -1 -20   93.86   18.97
  -9   1 -20   93.99   24.86
   9  -1 -20  141.03   27.73
   9   1 -20  149.64   26.85
   9   1  20  131.06   44.38
   9  -1  20  133.97   32.09
 -10  -1   0  546.52   19.54
 -10   1   0  534.76   12.50
  10   1   0  548.63   11.61
  10  -1   0  547.25   11.92
  10   1   0  598.42   15.85
  10  -1   0  558.52   17.71
 -10  -1   1    1.82    3.00
 -10  -1  -1   -1.20    3.96
 -10   1  -1    1.63    2.62
 -10   1   1    1.06    3.57
  10   1   1    2.75    1.80
  10   1  -1    3.19    2.52
  10  -1   1    2.90    2.03
  10  -1  -1    2.05    1.83
  10   1  -1   -0.01    6.81
  10  -1  -1    4.73    3.09
  10   1   1    1.57    3.96
  10  -1   1    4.44    3.68
 -10  -1   2  919.35   19.14
 -10  -1  -2  936.97   22.64
 -10   1   2  816.44   17.58
 -10   1  -2  897.54   21.16
  10   1  -2  973.14   20.47
  10  -1  -2  874.10   23.29
  10   1  -2  809.51   20.21
  10   1   2  912.04   25.28
  10  -1   2  839.90   20.67
 -10  -1   3  133.73   10.29
 -10  -1  -3  147.11   35.38
 -10   1   3  134.09   11.18
 -10   1  -3  147.62   16.73
  10   1  -3  153.86   11.97
  10  -1  -3  155.47   11.57
  10   1  -3  150.11   21.19
  10  -1  -3  144.86   22.20
  10   1   3  149.31   14.22
  10  -1   3  163.42   14.24
 -10  -1  -4  451.06   13.98
 -10   1  -4  394.86   12.95
 -10   1   4  369.44   26.28
  10   1  -4  358.33   25.29
  10  -1  -4  416.37   29.55
  10   1  -4  416.44   31.67
  10  -1  -4  399.08   30.65
  10   1   4  405.37   14.25
  10  -1   4  437.90   33.74
 -10  -1  -5   12.35   11.73
 -10   1  -5   14.47   10.51
 -10   1   5    7.79    4.35
  10  -1  -5   12.62    4.21
  10  -1  -5   18.64   10.77
  10   1  -5   15.26    9.16
  10   1   5   14.68    9.01
  10  -1   5   19.56    9.93
 -10   1   6  404.56   31.83
 -10  -1  -6  424.36   19.60
 -10   1   6  402.44    3.33
 -10   1  -6  395.35   18.76
  10   1  -6  542.53   24.76
  10  -1  -6  524.50   22.50
  10   1   6  476.59   14.29
  10  -1   6  503.84   28.03
 -10  -1  -7  133.25   31.48
 -10   1  -7  121.77   21.60
  10  -1  -7  157.23   16.09
  10   1  -7  152.25   14.32
  10   1   7  149.44   20.47
  10  -1   7  138.14   14.65
 -10  -1  -8  108.28   12.53
 -10   1  -8  108.45   12.42
  10  -1  -8  147.05   12.94
  10   1  -8  145.64   13.41
  10   1   8  141.04   15.11
  10  -1   8  147.09   19.87
 -10  -1  -9  123.45   15.89
 -10   1  -9  132.95   15.08
  10  -1  -9  194.16   18.17
  10   1  -9  188.78   20.34
  10   1   9  127.85   16.97
  10  -1   9  192.08   20.39
 -10  -1 -10  152.37   16.16
 -10   1 -10  153.93   16.08
  10  -1 -10  227.03   24.04
  10   1 -10  239.10   21.25
  10   1  10  220.43   25.79
  10  -1  10  217.30   22.50
 -10  -1 -11  375.00   24.24
 -10   1 -11  376.52   15.30
  10  -1 -11  589.68   58.27
  10   1 -11  587.73   15.50
  10   1  11  542.51   17.81
  10  -1  11  570.89   34.65
 -10  -1 -12  113.76   25.74
 -10   1 -12  108.87   15.85
  10  -1 -12  165.62   13.17
  10   1 -12  167.98   17.02
  10   1  12  149.34   14.75
  10  -1  12  162.37   15.79
 -10  -1 -13   98.94   30.77
 -10   1 -13   93.83   16.32
  10  -1 -13  137.92   17.88
  10   1 -13  137.69   17.83
  10   1  13  127.05   28.64
  10  -1  13  136.81   21.22
 -10  -1 -14  320.04   23.76
 -10   1 -14  373.14   35.24
  10  -1 -14  554.64   31.61
  10   1 -14  558.85   32.85
  10   1  14  504.57   31.00
  10  -1  14  536.18   33.37
 -10  -1 -15  277.63   44.07
 -10   1 -15  331.21   33.97
  10  -1 -15  471.30   35.73
  10   1 -15  504.00   33.53
  10   1  15  430.21   29.19
  10  -1  15  455.60   31.97
 -10  -1 -16   38.58   26.54
 -10   1 -16   33.97   26.34
  10  -1 -16   53.23   16.21
  10   1 -16   55.69    9.99
  10   1  16   51.71   29.99
  10  -1  16   46.49   31.31
 -10  -1 -17  142.02   21.30
 -10   1 -17  134.47   21.61
  10  -1 -17  219.48   28.14
  10   1 -17  214.02   27.82
  10   1  17  228.01   31.45
  10  -1  17  214.03   42.76
 -10  -1 -18   53.43   13.11
 -10   1 -18   59.48   15.69
  10  -1 -18   73.82    9.61
  10   1 -18   90.57   11.07
  10   1  18   75.04   42.21
  10  -1  18   78.50   15.12
 -10  -1 -19  286.84   27.14
 -10   1 -19  307.97   29.54
  10  -1 -19  423.63   33.77
  10   1 -19  436.78   34.87
  10   1  19  420.15   37.82
  10  -1  19  438.81   37.04
 -11  -1   0   -1.38    4.42
 -11   1   0    0.66    2.42
  11   1   0    0.43    1.40
  11  -1   0   -1.13    2.86
  11  -1   0    1.26    2.87
 -11  -1   1 1239.46   25.58
 -11  -1  -1 1290.39   33.44
 -11   1  -1 1384.87   29.36
 -11   1   1 1231.09   25.78
  11   1  -1 1261.96   25.73
  11   1  -1 1266.47   29.25
  11  -1  -1 1312.10   29.11
  11   1   1 1327.21   39.44
  11  -1   1 1242.77   32.06
 -11  -1   2   33.78   12.22
 -11  -1  -2   30.13    5.85
 -11   1  -2   36.66    8.97
 -11   1   2   17.45    4.06
  11  -1  -2   27.02    5.54
  11  -1  -2   31.44   10.41
  11   1  -2   32.06    6.80
  11   1   2   38.06   23.18
  11  -1   2   34.52   15.35
 -11  -1  -3 1320.77   50.40
 -11   1  -3 1441.50   54.88
 -11   1   3 1455.26   53.73
  11   1  -3 1401.70   51.54
  11   1  -3 1251.43   49.52
  11  -1  -3 1188.09   49.57
  11   1   3 1322.02   51.70
  11  -1   3 1365.08   55.06
 -11  -1   4   27.86    2.92
 -11  -1  -4   31.53   20.95
 -11   1  -4   27.51    7.06
 -11   1   4   26.81    3.11
  11   1  -4   36.48    7.15
  11  -1  -4   44.23   12.42
  11   1  -4   33.26   16.91
  11  -1  -4   34.00   11.59
  11   1   4   26.39    8.78
  11  -1   4   34.64   14.82
 -11  -1  -5 1208.14   49.45
 -11   1   5 1288.05   47.16
 -11   1  -5 1270.81   49.55
  11  -1  -5 1281.83   46.88
  11  -1  -5 1354.82   51.52
  11   1  -5 1337.74   57.56
  11   1   5 1376.80   55.12
  11  -1   5 1423.08   58.61
 -11  -1  -6   13.86   14.82
 -11   1   6   15.76    1.74
 -11   1  -6   18.35   12.12
  11  -1  -6   22.36   18.01
  11   1  -6   23.00   12.49
  11   1   6   18.77   12.07
  11  -1   6   21.08   13.90
 -11  -1  -7  832.30   36.20
 -11   1  -7  858.72   37.94
  11  -1  -7 1090.04   42.98
  11   1  -7 1082.88   41.17
  11   1   7  987.56   48.86
  11  -1   7 1051.58   43.87
 -11  -1  -8   40.22   17.93
 -11   1  -8   40.50    9.82
  11  -1  -8   53.13    7.45
  11   1  -8   56.58    9.38
  11   1   8   59.59   35.32
  11  -1   8   55.21    9.93
 -11  -1  -9  615.48   35.66
 -11   1  -9  653.22   31.05
  11   1  -9  836.25   36.26
  11  -1  -9  837.44   38.26
  11   1   9  777.90   38.34
  11  -1   9  850.27   39.42
 -11  -1 -10   66.58   24.10
 -11   1 -10   70.51   15.24
  11  -1 -10   98.70    8.26
  11   1 -10   99.28   21.44
  11   1  10   70.03   14.01
  11  -1  10   97.03   15.11
 -11  -1 -11  510.02   34.19
 -11   1 -11  513.64   36.14
  11  -1 -11  704.29   44.00
  11   1 -11  722.54   48.33
  11   1  11  655.36   59.34
  11  -1  11  681.80   46.24
 -11  -1 -12  158.86   33.90
 -11   1 -12  160.69   21.59
  11   1 -12  202.05   36.90
  11  -1 -12  220.67   27.01
  11   1  12  193.64   25.93
  11  -1  12  211.67   27.86
 -11  -1 -13  503.21   33.44
 -11   1 -13  534.28   34.57
  11  -1 -13  712.03   39.28
  11   1 -13  716.99   43.68
  11   1  13  632.38   37.38
  11  -1  13  661.01   64.41
 -11  -1 -14   75.80   17.03
 -11   1 -14   84.31   16.44
  11  -1 -14  120.47   11.30
  11   1 -14  122.45   12.89
  11   1  14  118.89   27.61
  11  -1  14  116.41   28.44
 -11  -1 -15  234.41   22.46
 -11   1 -15  263.79   24.69
  11  -1 -15  357.49   46.13
  11   1 -15  357.08   51.29
  11   1  15  305.28   50.54
  11  -1  15  319.41   51.24
 -11  -1 -16   51.78   33.28
 -11   1 -16   73.91   41.94
  11  -1 -16   93.67   10.93
  11   1 -16   94.43   12.21
  11   1  16   91.12   27.80
  11  -1  16   88.00   27.95
 -11  -1 -17  135.58   25.10
 -11   1 -17  143.20   20.70
  11  -1 -17  200.00   25.79
  11   1 -17  205.96   26.92
  11   1  17  172.39   35.04
  11  -1  17  176.42   41.95
 -11  -1 -18  200.68   33.06
 -11   1 -18  210.76   35.46
  11  -1 -18  270.56   41.46
  11   1 -18  290.32   44.71
  11   1  18  279.91   45.03
  11  -1  18  308.01   49.16
 -11  -1 -19   91.14   20.59
 -11   1 -19   92.28   19.73
  11  -1 -19  135.92   25.71
  11   1 -19  129.40   23.77
  11   1  19  141.30   37.19
  11  -1  19  137.30   45.66
 -12  -1   0 1125.73   43.50
 -12   1   0 1083.70   41.68
  12   1   0 1180.75   46.55
  12  -1   0 1182.16   50.25
 -12  -1   1    4.40    3.56
 -12   1  -1    3.30    4.17
 -12   1   1    2.73    1.93
  12  -1  -1    3.63    2.62
  12   1  -1    7.34    4.87
  12   1   1    7.43    5.64
  12  -1   1    4.72    3.47
 -12  -1   2  372.08   30.42
 -12  -1  -2  388.95   33.86
 -12   1   2  385.04   31.16
 -12   1  -2  385.49   11.42
  12   1  -2  400.81   32.13
  12  -1  -2  335.59   27.30
  12   1  -2  378.51   33.92
  12  -1  -2  384.90   32.22
  12   1   2  408.44   12.26
  12  -1   2  370.61   11.72
 -12  -1   3    0.35    1.71
 -12  -1  -3    0.00    7.75
 -12   1  -3    2.08    2.15
 -12   1   3    0.63    3.07
  12   1  -3   -0.40    2.17
  12  -1  -3    1.44    1.74
  12   1  -3    1.26    1.26
  12  -1  -3   -1.09    5.41
  12   1   3   -4.21    6.02
  12  -1   3    0.80    3.03
 -12  -1   4  907.24   32.14
 -12  -1  -4  766.56   35.20
 -12   1   4  922.13   33.07
 -12   1  -4  913.66   38.03
  12   1  -4  815.57   29.06
  12  -1  -4  826.02   29.64
  12   1  -4  808.48   35.39
  12  -1  -4  796.17   31.40
  12   1   4  846.05   43.42
  12  -1   4  860.93   36.02
 -12  -1  -5  196.89   29.52
 -12   1   5  226.08   15.88
 -12   1  -5  218.77   18.07
  12  -1  -5  206.26   14.62
  12   1  -5  209.72   17.35
  12  -1  -5  208.73   17.80
  12   1   5  198.73   18.00
  12  -1   5  207.67   17.52
 -12   1   6  128.91   12.32
 -12  -1  -6  120.97   22.89
 -12   1  -6  162.10   31.01
  12  -1  -6  129.79   12.40
  12   1  -6  134.63   15.31
  12  -1  -6  141.23   27.72
  12   1   6  119.41   16.85
  12  -1   6  142.72   16.61
 -12  -1  -7   83.00   21.71
 -12   1  -7   76.89   20.03
  12   1  -7   74.58   11.38
  12  -1  -7   73.35   10.06
  12   1   7   75.21   28.48
  12  -1   7   65.44   18.94
 -12  -1  -8  298.27   30.98
 -12   1  -8  309.08   31.91
  12  -1  -8  355.46   36.10
  12   1  -8  360.68   36.00
  12   1   8  326.24   33.94
  12  -1   8  361.47   37.31
 -12  -1  -9  343.14   35.24
 -12   1  -9  338.07   36.39
  12  -1  -9  429.94   45.56
  12   1  -9  403.12   40.72
  12   1   9  380.10   53.06
  12  -1   9  419.18   42.49
 -12  -1 -10  105.89   13.56
 -12   1 -10  112.09   28.21
  12   1 -10  128.23   11.69
  12  -1 -10  129.41   10.81
  12   1  10  124.86   14.01
  12  -1  10  134.35   13.28
 -12  -1 -11  139.19   36.77
 -12   1 -11  137.76   20.98
  12  -1 -11  165.18   19.54
  12   1 -11  167.25   20.12
  12   1  11  146.37   14.72
  12  -1  11  154.94   20.62
 -12  -1 -12  349.12   23.29
 -12   1 -12  352.88   24.22
  12  -1 -12  459.62   30.14
  12   1 -12  484.35   29.60
  12   1  12  427.68   34.06
  12  -1  12  467.14   31.32
 -12  -1 -13  356.55   28.88
 -12   1 -13  367.87   30.68
  12  -1 -13  487.92   54.29
  12   1 -13  471.54   55.91
  12   1  13  463.69   35.93
  12  -1  13  457.36   66.80
 -12  -1 -14  234.05   42.23
 -12   1 -14  254.02   33.93
  12  -1 -14  305.50   38.44
  12   1 -14  310.46   39.49
  12  -1  14  310.07   40.72
  12   1  14  288.06   38.08
 -12  -1 -15  128.86   27.95
 -12   1 -15  143.36   25.93
  12  -1 -15  163.45   19.35
  12   1 -15  175.34   17.51
  12   1  15  159.52   40.17
  12  -1  15  171.21   20.03
 -12  -1 -16  142.02   38.20
 -12   1 -16  109.10   19.92
  12  -1 -16  169.95   22.51
  12   1 -16  185.95   23.11
  12   1  16  171.05   24.30
  12  -1  16  139.20   24.29
 -12  -1 -17  370.88   35.21
 -12   1 -17  388.73   36.09
  12  -1 -17  502.88   43.21
  12   1 -17  519.37   45.56
  12   1  17  484.13   43.64
  12  -1  17  515.00   47.73
 -12  -1 -18   34.33   27.12
 -12   1 -18   31.95   23.36
  12  -1 -18   46.87    7.45
  12   1 -18   42.32   20.55
  12   1  18   39.04   41.56
  12  -1  18   42.31   39.03
 -13   1   0   -2.35    5.68
  13   1   0   -0.27    6.06
  13  -1   0    3.47    5.18
 -13  -1   1 1589.55   56.96
 -13  -1  -1 1430.35   53.62
 -13   1   1 1415.20   51.49
 -13   1  -1 1374.41   54.07
  13   1  -1 1473.66   52.64
  13   1  -1 1434.56   58.61
  13  -1  -1 1493.16   56.00
  13   1   1 1463.01   54.83
  13  -1   1 1430.56   58.08
 -13  -1   2   46.36   10.02
 -13  -1  -2   49.97   11.19
 -13   1   2   43.73    9.24
 -13   1  -2   44.37   29.44
  13   1  -2   44.21    3.26
  13  -1  -2   43.04    3.93
  13   1  -2   46.19    8.09
  13  -1  -2   43.08   16.27
  13   1   2   47.30   25.26
  13  -1   2   46.66    6.16
 -13  -1   3 1294.93   50.88
 -13  -1  -3 1294.04   54.15
 -13   1   3 1399.55   56.94
 -13   1  -3 1264.31   52.08
  13   1  -3 1268.11   49.84
  13  -1  -3 1121.11   45.14
  13   1  -3 1134.94   51.54
  13  -1  -3 1152.50   52.55
  13   1   3 1260.37   53.28
  13  -1   3 1180.57   49.10
 -13  -1   4  297.13   23.39
 -13  -1  -4  281.61   26.09
 -13   1   4  314.42   25.26
 -13   1  -4  355.58   56.04
  13   1  -4  278.99   22.06
  13  -1  -4  256.36   20.64
  13   1  -4  248.92   22.05
  13  -1  -4  242.31   23.31
  13   1   4  305.72   26.91
  13  -1   4  287.22   26.48
 -13   1   5 1001.06   39.27
 -13  -1  -5 1005.97   42.42
 -13   1  -5  913.84   39.06
  13  -1  -5  842.57   33.16
  13   1  -5  894.73   39.11
  13  -1  -5  873.13   37.72
  13   1   5  899.93   44.02
  13  -1   5 1105.76   48.41
 -13   1   6  139.68   13.29
 -13  -1  -6  129.58   15.79
 -13   1  -6  188.00   35.01
  13  -1  -6  133.47   12.72
  13   1  -6  143.47   27.45
  13  -1  -6  142.42   16.86
  13   1   6  125.84   16.15
  13  -1   6  143.77   17.47
 -13  -1  -7  851.15   48.11
 -13   1  -7  804.46   45.53
  13   1  -7  861.10   50.66
  13  -1  -7  845.95   46.55
  13   1   7  693.70   40.24
  13  -1   7  871.13   49.15
 -13  -1  -8   60.23   41.21
 -13   1  -8   48.97   13.51
  13  -1  -8   46.49   14.94
  13   1  -8   46.02    9.88
  13   1   8   39.30   10.51
  13  -1   8   59.53   20.31
 -13  -1  -9  835.34   50.69
 -13   1  -9  844.40   54.62
  13  -1  -9  971.72   57.54
  13   1  -9  940.52   55.95
  13   1   9  886.96   58.23
  13  -1   9  949.07   57.61
 -13  -1 -10    0.23    4.19
 -13   1 -10    3.51    7.92
  13  -1 -10    4.98    7.86
  13   1 -10    3.71    5.40
  13   1  10    2.08    7.45
  13  -1  10   -0.92    8.01
 -13  -1 -11  643.04   47.59
 -13   1 -11  640.17   37.58
  13  -1 -11  776.89   42.24
  13   1 -11  754.61   48.65
  13   1  11  663.82   43.83
  13  -1  11  746.55   46.05
 -13  -1 -12   93.07   28.21
 -13   1 -12   90.03   15.66
  13  -1 -12  101.34   24.43
  13   1 -12  105.98   12.10
  13   1  12  103.61   15.47
  13  -1  12  103.48   36.31
 -13  -1 -13  483.02   33.34
 -13   1 -13  542.79   35.91
  13  -1 -13  560.96   40.73
  13   1 -13  550.79   41.67
  13   1  13  553.04   37.95
  13  -1  13  585.07   41.83
 -13  -1 -14   55.52   15.29
 -13   1 -14   50.15   35.46
  13  -1 -14   64.83    7.97
  13   1 -14   68.86   10.64
  13   1  14   55.48   33.48
  13  -1  14   62.96   28.71
 -13  -1 -15  263.99   39.82
 -13   1 -15  328.44   28.60
  13  -1 -15  382.02   30.05
  13   1 -15  372.69   34.56
  13   1  15  356.00   31.69
  13  -1  15  384.11   38.58
 -13  -1 -16  120.68   36.93
 -13   1 -16  119.93   34.70
  13  -1 -16  150.00   19.25
  13   1 -16  146.94   19.20
  13   1  16  154.38   22.65
  13  -1  16  137.21   35.10
 -13  -1 -17  161.11   24.34
 -13   1 -17  150.06   30.53
  13  -1 -17  194.03   26.06
  13   1 -17  187.82   26.24
  13   1  17  166.22   44.78
  13  -1  17  177.93   27.43
 -13  -1 -18  188.92   26.59
 -13   1 -18  215.01   29.12
  13   1 -18  271.46   34.14
  13   1  18  244.80   31.98
  13  -1  18  254.39   45.74
 -14  -1   0  756.65   34.59
 -14   1   0  842.66   35.49
  14   1   0  829.01   37.37
  14  -1   0  830.19   40.56
 -14  -1   1   37.24   13.18
 -14  -1  -1   30.98   15.00
 -14   1  -1    4.17    6.67
 -14   1   1   34.13   12.10
  14   1  -1   36.17   23.40
  14  -1   1   38.92   22.79
  14   1   1   41.19   24.21
 -14  -1   2  775.98   32.68
 -14  -1  -2  793.85   37.86
 -14   1  -2  708.15   32.08
 -14   1   2  795.16   33.76
  14   1  -2  783.99   31.80
  14   1  -2  737.43   33.30
  14  -1  -2  769.08   34.66
  14   1   2  827.73   36.71
  14  -1   2  760.97   36.52
 -14  -1   3   39.26    6.08
 -14  -1  -3   42.52   22.32
 -14   1   3   45.31   10.53
 -14   1  -3   51.18   10.21
  14   1  -3   43.37    7.20
  14  -1  -3   35.58   14.64
  14   1  -3   45.26   18.89
  14  -1  -3   41.89   25.73
  14   1   3   44.78   11.79
  14  -1   3   47.63   26.99
 -14  -1   4  210.02   20.32
 -14  -1  -4  229.26   24.81
 -14   1   4  227.43   22.18
 -14   1  -4  238.55   25.13
  14   1  -4  232.21   24.42
  14   1  -4  203.77   22.11
  14  -1  -4  208.42   27.86
  14   1   4  223.24   24.53
  14  -1   4  195.99   28.72
 -14   1   5   55.67    3.33
 -14  -1  -5   52.55   10.54
 -14   1  -5   58.94   13.17
  14   1  -5   43.03   25.63
  14  -1  -5   38.37   25.12
  14   1   5   51.88   29.55
  14  -1   5   51.63   13.29
 -14  -1  -6  270.12   30.81
 -14   1  -6  269.16   29.10
  14   1  -6  248.19   26.47
  14  -1  -6  228.56   23.73
  14   1   6  246.90   28.15
  14  -1   6  287.10   31.79
 -14  -1  -7  263.55   27.19
 -14   1  -7  253.11   26.55
  14  -1  -7  254.36   26.89
  14   1  -7  249.48   26.14
  14   1   7  250.09   29.25
  14  -1   7  274.51   29.27
 -14  -1  -8   86.21   19.69
 -14   1  -8   89.15   16.45
  14  -1  -8   90.75   12.82
  14   1  -8   87.27   12.78
  14   1   8   93.00   18.67
  14  -1   8   91.52   18.14
 -14  -1  -9   67.91   17.49
 -14   1  -9   69.90   34.41
  14  -1  -9   73.40   12.13
  14   1  -9   61.14   19.34
  14   1   9   65.64   24.35
  14  -1   9   71.47   23.81
 -14  -1 -10  347.57   26.27
 -14   1 -10  364.62   17.28
  14   1 -10  379.46   42.98
  14  -1 -10  408.65   45.62
  14   1  10  369.39   52.87
  14  -1  10  401.35   16.96
 -14  -1 -11  279.02   32.97
 -14   1 -11  266.39   44.12
  14  -1 -11  285.89   34.40
  14   1 -11  307.24   46.18
  14   1  11  283.68   46.21
  14  -1  11  297.43   35.16
 -14  -1 -12  201.97   28.48
 -14   1 -12  208.07   37.96
  14  -1 -12  236.82   30.60
  14   1 -12  240.77   31.68
  14   1  12  244.62   33.87
  14  -1  12  229.62   39.47
 -14  -1 -13  161.72   24.11
 -14   1 -13  173.88   47.86
  14  -1 -13  210.68   27.49
  14   1 -13  188.80   24.80
  14   1  13  190.10   26.82
  14  -1  13  202.34   29.71
 -14  -1 -14  456.40   38.18
 -14   1 -14  419.14   35.88
  14  -1 -14  536.38   46.00
  14   1 -14  541.28   53.75
  14   1  14  498.47   43.05
  14  -1  14  613.76   49.04
 -14  -1 -15  499.54   44.92
 -14   1 -15  431.16   38.94
  14  -1 -15  527.54   45.20
  14   1 -15  514.27   47.22
  14   1  15  451.54   42.17
  14  -1  15  513.56   48.22
 -14  -1 -16   69.32   25.74
 -14   1 -16   65.74   38.77
  14   1 -16  108.88   12.76
  14  -1 -16   96.89    8.68
  14   1  16   88.75   26.30
  14  -1  16  103.74   37.48
 -14  -1 -17  220.44   29.31
 -14   1 -17  242.66   32.06
  14   1 -17  259.78   38.81
  14   1  17  277.17   36.52
  14  -1  17  264.92   34.89
 -15  -1   0    1.25    4.79
 -15   1   0   -1.95    5.95
  15   1   0   -2.91    8.65
  15  -1   0    0.59    3.13
 -15  -1   1 1485.17   87.66
 -15  -1  -1 1528.98   92.93
 -15   1  -1 1391.48   84.90
 -15   1   1 1510.15   90.74
  15  -1  -1 1513.21   92.76
  15   1  -1 1503.62   94.19
  15   1   1 1524.08   91.91
  15  -1   1 1541.04   92.50
 -15  -1   2   30.20   10.21
 -15  -1  -2   20.85   13.03
 -15   1  -2   12.23   15.05
 -15   1   2   21.70   12.81
  15   1  -2   21.46   14.30
  15  -1  -2   27.59   20.99
  15   1   2   23.77   14.96
  15  -1   2   22.48   14.73
 -15  -1   3 1033.62   60.89
 -15  -1  -3 1093.53   67.03
 -15   1   3 1192.32   70.40
 -15   1  -3 1039.90   63.48
  15   1  -3 1058.09   65.89
  15  -1  -3 1059.73   64.79
  15   1   3 1121.12   68.86
  15  -1   3 1049.32   66.53
 -15  -1  -4  148.78   12.05
 -15   1   4  156.54   10.29
 -15   1  -4  137.98   12.20
  15   1  -4  130.72   18.56
  15  -1  -4  135.34   12.69
  15   1   4  146.65   20.15
  15  -1   4  159.76   19.09
 -15  -1  -5  811.89   48.62
 -15   1  -5  831.76   50.18
  15   1  -5  640.15   43.53
  15  -1  -5  634.42   43.43
  15   1   5  748.74   51.09
  15  -1   5  763.01   47.02
 -15  -1  -6   83.24   20.99
 -15   1  -6   97.05   23.34
  15  -1  -6   86.48   12.26
  15   1  -6   82.90   11.77
  15   1   6   93.81   12.54
  15  -1   6   88.92   13.74
 -15  -1  -7  987.24   53.84
 -15   1  -7  933.21   50.75
  15   1  -7  808.22   44.54
  15  -1  -7  814.65   44.76
  15   1   7  818.60   53.17
  15  -1   7  870.45   58.19
 -15  -1  -8   26.80   21.85
 -15   1  -8   29.27   17.95
  15   1  -8   29.03   19.24
  15  -1  -8   28.18   18.71
  15   1   8   33.80   15.09
  15  -1   8   30.78   17.42
 -15  -1  -9  923.12   61.65
 -15   1  -9  827.64   55.15
  15   1  -9  791.45   55.43
  15  -1  -9  836.43   53.66
  15   1   9  749.09   59.15
  15  -1   9  894.59   58.49
 -15  -1 -10   -1.19    9.29
 -15   1 -10   -1.40    9.16
  15  -1 -10    5.02    3.72
  15   1 -10    4.62    8.10
  15   1  10    5.57   10.97
  15  -1  10   -0.11    3.65
 -15  -1 -11  621.87   49.51
 -15   1 -11  579.96   45.70
  15  -1 -11  620.09   47.60
  15   1 -11  617.10   48.33
  15   1  11  562.26   49.05
  15  -1  11  603.65   53.79
 -15  -1 -12   11.97    7.09
 -15   1 -12   14.78   15.48
  15  -1 -12   16.47   14.87
  15   1 -12   12.62    8.55
  15  -1  12    9.06    7.06
  15   1  12   13.06   10.29
 -15  -1 -13  488.15   39.29
 -15   1 -13  418.95   35.11
  15  -1 -13  510.24   39.04
  15   1 -13  528.23   40.75
  15   1  13  477.66   39.16
  15  -1  13  534.59   43.08
 -15  -1 -14   67.90   11.81
 -15   1 -14   71.23   19.75
  15  -1 -14   59.53   23.29
  15   1 -14   55.75   18.11
  15   1  14   61.18   42.98
  15  -1  14   68.37   37.05
 -15  -1 -15  346.89   36.97
 -15   1 -15  336.56   47.72
  15  -1 -15  371.53   35.93
  15   1 -15  362.82   36.25
  15   1  15  310.56   35.82
  15  -1  15  390.36   40.40
 -15  -1 -16  140.79   27.04
 -15   1 -16  148.04   27.54
  15   1 -16  148.77   34.72
  15   1  16  142.42   28.34
  15  -1  16  153.63   29.34
 -16  -1   0 1193.08   71.45
 -16   1   0 1151.41   66.85
  16   1   0 1334.07   79.03
  16  -1   0 1278.11   81.07
 -16  -1   1   18.80   17.19
 -16  -1  -1   26.10   24.97
 -16   1   1   23.94   12.86
 -16   1  -1   25.31   13.66
  16  -1  -1   24.08   17.31
  16   1  -1   33.22   18.50
 -16  -1   2  254.35   29.81
 -16  -1  -2  249.45   35.97
 -16   1   2  251.80   28.57
 -16   1  -2  250.80   28.84
  16  -1  -2  259.63   30.82
  16   1  -2  271.15   32.47
  16  -1   2  251.21   29.85
  16   1   2  266.68   32.49
 -16  -1  -3    2.44    4.43
 -16   1   3    1.68    3.82
 -16   1  -3    4.13    4.11
  16  -1  -3   -0.69    7.27
  16   1  -3    0.68    3.89
  16   1   3    3.62    9.44
  16  -1   3    6.28    6.93
 -16  -1  -4  457.48   28.32
 -16   1  -4  426.14   28.25
  16   1  -4  404.78   24.49
  16  -1  -4  384.25   28.54
  16   1   4  424.21   31.42
  16  -1   4  427.00   26.60
 -16  -1  -5  126.53   25.45
 -16   1  -5  142.93   20.25
  16   1  -5  120.47   18.29
  16  -1  -5  116.42   17.56
  16   1   5  143.68   20.28
  16  -1   5  109.66   20.22
 -16  -1  -6  120.83   20.37
 -16   1  -6  146.19   24.51
  16   1  -6   98.59   11.69
  16  -1  -6   93.37    9.65
  16   1   6  124.77   10.97
  16  -1   6  116.46   13.03
 -16  -1  -7   43.28   25.34
 -16   1  -7   43.78   25.01
  16   1  -7   36.21   24.37
  16  -1  -7   29.73   20.63
  16  -1   7   47.63   23.42
  16   1   7   38.15   22.67
 -16  -1  -8  315.37   30.78
 -16   1  -8  344.87   36.99
  16  -1  -8  289.30   37.24
  16   1  -8  278.28   37.81
  16   1   8  289.58   22.05
  16  -1   8  292.11   24.90
 -16  -1  -9  264.29   34.37
 -16   1  -9  239.12   45.30
  16   1  -9  224.77   29.61
  16  -1  -9  223.65   28.90
  16   1   9  210.17   39.63
  16  -1   9  242.61   33.11
 -16  -1 -10   91.13   16.03
 -16   1 -10   84.54   13.49
  16  -1 -10   81.14    9.23
  16   1 -10   74.28   10.14
  16  -1  10   95.39   18.15
  16   1  10   81.58   17.07
 -16  -1 -11   78.46   23.80
 -16   1 -11   86.33   33.97
  16   1 -11   90.75   11.87
  16  -1 -11   92.33   10.95
  16   1  11   91.86   11.93
  16  -1  11   84.98   24.64
 -16  -1 -12  234.25   30.56
 -16   1 -12  208.67   50.46
  16  -1 -12  227.90   27.18
  16   1 -12  237.93   28.29
  16   1  12  210.63   26.88
  16  -1  12  219.67   43.16
 -16  -1 -13  378.14   34.84
 -16   1 -13  321.27   30.77
  16  -1 -13  325.09   29.38
  16   1 -13  315.30   29.59
  16   1  13  305.40   30.42
  16  -1  13  334.76   33.99
 -16  -1 -14   95.67   42.37
 -16   1 -14  110.88   39.86
  16  -1 -14  111.78    8.69
  16   1 -14  109.04   11.25
  16  -1  14   99.16   25.51
  16   1  14   96.82   37.45
 -16  -1 -15  242.06   31.74
 -16   1 -15  208.74   39.23
  16   1 -15  236.76   30.92
  16   1  15  222.37   47.02
  16  -1  15  238.02   33.29
 -17  -1   0    3.66    6.05
 -17   1   0   -0.56    4.69
  17   1   0   -0.11    7.38
 -17  -1  -1 1125.99   70.41
 -17   1  -1 1062.04   70.38
 -17   1   1 1023.96   65.36
  17   1  -1 1240.19   78.91
  17  -1  -1 1186.93   80.35
  17   1   1 1207.70   77.72
  17  -1   1 1191.98   77.64
 -17  -1  -2    2.32    3.84
 -17   1  -2   -0.42    4.08
  17   1  -2    1.25    4.02
  17  -1  -2    0.05    4.33
  17   1   2    1.10    6.28
 -17  -1  -3 1223.93   84.77
 -17   1  -3 1021.17   64.85
  17   1  -3 1006.61   64.87
  17  -1  -3 1046.60   67.69
  17   1   3 1026.13   68.44
  17  -1   3 1048.20   69.08
 -17  -1  -4   10.69    5.54
 -17   1  -4    1.26    6.95
  17   1  -4    7.78    5.58
  17  -1  -4    9.22    6.05
  17   1   4    9.19   12.33
  17  -1   4    8.96    9.39
 -17  -1  -5  952.87   57.11
 -17   1  -5  925.73   58.62
  17  -1  -5  837.40   50.69
  17   1  -5  863.09   52.87
  17   1   5  874.54   58.74
  17  -1   5  854.94   54.93
 -17  -1  -6    4.81    6.86
 -17   1  -6    4.60    7.78
  17  -1  -6    5.91    7.99
  17   1  -6    6.76    5.84
  17   1   6    8.93    6.06
  17  -1   6    3.62    5.07
 -17  -1  -7  772.42   65.68
 -17   1  -7  812.24   62.55
  17  -1  -7  654.10   49.85
  17   1  -7  695.88   54.08
  17   1   7  781.72   63.02
  17  -1   7  720.89   59.65
 -17  -1  -8   73.39   11.48
 -17   1  -8   68.77   21.45
  17  -1  -8   65.38    8.21
  17   1  -8   61.00   19.15
  17   1   8   63.25   27.34
  17  -1   8   68.36   16.92
 -17  -1  -9  724.11   54.68
 -17   1  -9  668.89   51.50
  17  -1  -9  577.67   47.04
  17   1  -9  549.44   42.31
  17   1   9  608.81   51.01
  17  -1   9  596.48   46.15
 -17  -1 -10   89.22   36.66
 -17   1 -10   73.51   43.54
  17   1 -10   64.32   18.66
  17  -1 -10   70.12    8.21
  17   1  10   63.72   18.51
  17  -1  10   79.29   24.36
 -17  -1 -11  421.32   42.31
 -17   1 -11  534.83   46.92
  17  -1 -11  420.29   36.47
  17   1 -11  382.43   34.10
  17   1  11  392.21   36.27
  17  -1  11  426.84   38.79
 -17  -1 -12   70.43   17.79
 -17   1 -12   75.51   18.54
  17  -1 -12   65.02    8.00
  17   1 -12   66.68   19.38
  17   1  12   66.67   20.45
  17  -1  12   56.65   39.09
 -17  -1 -13  434.76   38.06
 -17   1 -13  458.40   37.09
  17  -1 -13  386.18   36.71
  17   1 -13  406.71   32.32
  17   1  13  379.47   49.02
  17  -1  13  434.20   41.51
 -17  -1 -14   64.70   52.40
 -17   1 -14   65.42   12.67
  17   1 -14   59.88   24.44
  17   1  14   73.04   21.56
  17  -1  14   68.31   24.79
 -18   1   0  483.55   30.06
  18   1   0  492.02   33.21
  18  -1   0  498.39   38.07
 -18  -1  -1    3.78    5.82
 -18   1  -1    0.18    2.82
  18  -1   1    2.74    5.19
 -18  -1  -2  571.56   38.77
 -18   1  -2  557.09   34.28
  18   1  -2  617.80   39.12
  18  -1  -2  610.89   39.78
  18   1   2  623.14   54.50
  18  -1   2  633.82   41.98
 -18  -1  -3   80.56   14.16
 -18   1  -3   69.10   22.02
  18  -1  -3   73.68    9.95
  18   1  -3   76.92   29.57
  18  -1   3   83.72   13.05
  18   1   3   76.61   13.27
 -18  -1  -4  249.08   33.79
 -18   1  -4  246.34   32.51
  18  -1  -4  248.60   32.91
  18   1  -4  240.02   32.40
  18   1   4  278.93   39.47
  18  -1   4  243.34   32.80
 -18  -1  -5   14.70   16.31
 -18   1  -5   13.99   12.12
  18  -1  -5   12.51    7.44
  18   1  -5   14.08   10.42
  18   1   5    9.71    6.18
  18  -1   5   16.89   15.63
 -18  -1  -6  466.78   36.35
 -18   1  -6  405.97   32.91
  18  -1  -6  345.57   42.31
  18   1  -6  358.06   45.24
  18   1   6  366.33   42.96
  18  -1   6  368.27   30.57
 -18  -1  -7  182.47   23.71
 -18   1  -7  140.76   17.61
  18  -1  -7  116.30   14.41
  18   1  -7  120.99   13.51
  18  -1   7  126.61   34.77
  18   1   7  141.98   21.22
 -18  -1  -8  177.24   22.58
 -18   1  -8  123.42   29.04
  18  -1  -8  108.49    9.28
  18   1  -8  105.68   23.40
  18   1   8  148.27   20.84
  18  -1   8  105.89   31.11
 -18  -1  -9  116.43   39.38
 -18   1  -9  143.08   27.11
  18  -1  -9   80.00    8.47
  18   1  -9   87.64    9.44
  18   1   9   94.86   37.52
  18  -1   9   87.45   31.89
 -18  -1 -10  311.66   29.41
 -18   1 -10  306.24   29.30
  18  -1 -10  247.84   28.68
  18   1 -10  243.42   28.79
  18  -1  10  257.75   26.24
  18   1  10  259.61   28.12
 -18  -1 -11  296.87   31.06
 -18   1 -11  287.78   30.03
  18  -1 -11  238.51   36.82
  18   1 -11  223.98   34.81
  18   1  11  243.19   26.89
  18  -1  11  252.42   40.00
 -18  -1 -12  133.74   35.30
 -18   1 -12  119.36   32.64
  18  -1 -12  109.54    8.66
  18   1 -12  120.22   17.65
  18   1  12  102.99   26.77
  18  -1  12  119.27   25.60
  19   1   0    3.03    5.11
  19  -1   0    3.32    6.00
  19  -1  -1  949.95   74.33
  19   1  -1  975.42   72.63
  19   1   1  925.90   77.47
  19  -1   1  934.58   74.78
 -19  -1  -2    1.68    2.84
 -19   1  -2    2.29    2.96
  19   1  -2    3.08    5.05
  19  -1  -2    6.39   12.82
  19  -1   2    3.65    4.70
  19   1   2    4.90    7.70
 -19  -1  -3 1201.73   86.51
 -19   1  -3 1138.10   86.13
  19   1  -3 1202.35   91.31
  19  -1  -3 1152.52   87.15
  19   1   3 1211.39   96.49
  19  -1   3 1210.71   91.99
 -19  -1  -4   10.72    8.83
 -19   1  -4    9.31   11.27
  19  -1  -4   15.31   11.26
  19   1  -4    7.36   18.15
  19  -1   4   16.74    9.88
  19   1   4   18.17   14.06
 -19  -1  -5  976.67   71.84
 -19   1  -5  930.46   69.03
  19   1  -5  936.81   69.52
  19  -1  -5  876.77   66.36
  19   1   5  946.39   72.87
  19  -1   5  876.15   73.65
 -19  -1  -6   30.53    9.02
 -19   1  -6    7.33    7.37
  19  -1  -6   27.82   24.70
  19   1  -6   27.69   24.80
  19   1   6   28.77   29.66
  19  -1   6   29.33   30.04
 -19  -1  -7  807.17   69.55
 -19   1  -7  723.57   65.73
  19  -1  -7  630.97   53.92
  19   1  -7  663.40   56.28
  19   1   7  730.46   63.21
  19  -1   7  639.96   60.69
 -19  -1  -8   57.85   18.18
 -19   1  -8   52.06   10.47
  19   1  -8   42.66   22.47
  19  -1  -8   34.55   22.16
  19  -1   8   45.06   25.58
  19   1   8   39.41   33.88
 -19  -1  -9  563.36   54.17
 -19   1  -9  566.51   61.90
  19   1  -9  422.49   43.30
  19  -1  -9  405.55   38.76
  19   1   9  494.35   50.34
  19  -1   9  500.25   48.95
 -19  -1 -10   54.10   17.47
 -19   1 -10   50.93   35.91
  19  -1 -10   49.82    7.08
  19   1 -10   43.89   18.06
  19   1  10   53.55   44.79
  19  -1  10   51.39   23.55
 -19  -1 -11  477.55   59.03
 -19   1 -11  509.38   59.84
  19   1 -11  347.67   41.16
  19  -1  11  389.81   47.48
  19   1  11  433.52   54.08
  20   1   0  400.20   36.38
  20  -1   0  417.55   38.78
  20   1  -1   13.37   21.55
  20  -1  -1   15.76   16.02
  20   1   1   15.37   21.50
  20  -1   1   16.22   12.80
  20  -1  -2  224.88   27.07
  20   1  -2  210.73   33.02
  20   1   2  212.60   26.67
  20  -1   2  220.40   27.49
 -20  -1  -3    1.81    4.53
 -20   1  -3    0.60    2.80
  20   1  -3    6.04    9.78
  20  -1  -3    2.56    6.71
  20   1   3    1.48    7.00
  20  -1   3   -2.57    8.58
 -20  -1  -4  457.06   39.16
 -20   1  -4  479.55   41.47
  20  -1  -4  517.27   44.46
  20   1  -4  492.07   45.36
  20   1   4  510.11   45.43
  20  -1   4  517.97   45.18
 -20  -1  -5  104.88    9.59
 -20   1  -5  110.83   15.66
  20   1  -5   99.45   10.63
  20  -1  -5   84.90   16.86
  20   1   5   99.01   12.38
  20  -1   5   95.67   12.64
 -20  -1  -6  209.84   32.92
 -20   1  -6  208.59   35.47
  20   1  -6  201.05   31.86
  20  -1  -6  200.25   31.55
  20   1   6  210.28   34.31
  20  -1   6  196.60   32.82
 -20  -1  -7   36.33   22.94
 -20   1  -7   31.04   24.68
  20  -1  -7   30.66   26.38
  20   1  -7   42.61   22.43
  20   1   7   37.12   34.03
  20  -1   7   32.58   32.07
 -20  -1  -8  429.25   34.01
 -20   1  -8  446.44   37.56
  20  -1  -8  354.16   28.24
  20   1  -8  385.40   32.29
  20   1   8  409.40   34.08
  20  -1   8  405.21   35.13
 -20  -1  -9  214.91   37.26
 -20   1  -9  220.90   29.04
  20   1  -9  179.20   32.42
  20  -1  -9  166.60   28.77
  20   1   9  217.13   29.07
  20  -1   9  199.43   26.99
  21  -1   0    1.21    5.82
  21   1   0   -0.73    7.93
  21   1  -1  755.40   61.80
  21  -1  -1  756.23   60.86
  21  -1   1  811.84   61.88
  21   1   1  728.52   58.08
  21  -1  -2    1.70    4.17
  21   1  -2    3.76    5.94
  21   1   2    5.18    7.84
  21  -1   2    1.57    3.93
  21   1  -3  851.98   66.61
  21  -1  -3  883.87   65.68
  21   1   3  895.49   67.64
  21  -1   3  879.43   66.79
  21   1  -4    3.51    6.64
  21  -1  -4    4.43    6.40
  21   1   4    3.77    7.15
  21  -1   4    1.55    6.52
  21  -1  -5  680.19   78.35
  21   1  -5  727.56   84.38
  21   1   5  726.55   86.02
  21  -1   5  676.71   79.45
 -21  -1  -6   16.81   13.58
 -21   1  -6   14.63   13.54
  21  -1  -6   12.25   15.33
  21   1  -6   17.56   19.60
  21   1   6   19.82   22.29
  21  -1   6   22.24   19.42
   0   2  -1   44.73   12.60
   0  -2   1   45.09   12.92
   0   2   1   42.70    6.84
   0  -2  -1   48.13   14.20
   0   2  -1   47.28    8.52
   0  -2   1   51.65    7.77
   0   2   1   31.11    6.41
   0  -2  -1   22.53    4.20
   0   2  -2 1508.48   26.96
   0  -2   2 1536.48   26.89
   0   2   2 1658.61   31.23
   0  -2  -2 1634.16   28.55
   0   2  -2 1890.38   33.27
   0  -2   2 1700.40   29.64
   0   2   2 1399.57   23.88
   0  -2  -2 1576.58   26.61
   0   2   3  145.99    8.55
   0   2  -3  125.29    6.93
   0  -2   3  134.78    6.00
   0   2  -3  181.39    7.44
   0  -2   3  169.81    9.06
   0   2   3  159.42    9.01
   0  -2  -3  165.05    5.26
   0  -2  -4 1551.00   27.82
   0   2   4 1339.26   24.14
   0   2  -4 1030.75   19.12
   0  -2   4 1259.79   22.81
   0   2  -4 1857.28   33.00
   0  -2   4 1605.96   28.94
   0   2   4 1638.59   28.41
   0  -2  -5 1326.35   24.42
   0   2   5 1151.32   21.58
   0   2  -5  754.71   15.09
   0  -2   5 1056.69   21.89
   0   2   5 1569.77   27.71
   0  -2   5 1499.49   27.82
   0   2   5 1521.20   27.02
   0  -2  -6 1812.91   34.30
   0   2   6 1515.00   27.69
   0  -2   6 1370.20   25.01
   0   2   6 2218.89   38.56
   0   2  -6 2206.25   39.67
   0  -2   6 2058.92   37.14
   0   2   6 2135.31   37.44
   0  -2  -7  870.03   18.56
   0   2   7  696.52   16.60
   0   2  -7  430.73   66.31
   0  -2   7  625.15   13.03
   0   2   7 1041.33   19.23
   0   2  -7 1051.86   21.40
   0   2   7 1019.16   24.05
   0  -2  -8 1034.86   22.52
   0   2   8  795.01   16.30
   0   2  -8  584.70   13.45
   0  -2   8  748.05   15.46
   0   2  -8 1315.65   28.95
   0   2   8 1272.63   23.66
   0   2   8 1224.11   23.44
   0  -2  -9 1411.16   26.59
   0   2  -9  863.25   18.48
   0   2  -9 1773.62   42.56
   0   2   9 1676.09   42.20
   0  -2 -10  637.72   14.79
   0   2 -10  453.72   14.02
   0   2 -10  839.32   19.91
   0   2  10  809.33   25.20
   0  -2 -11  299.59   27.18
   0   2 -11  207.17   16.91
   0   2 -11  369.36   28.49
   0   2  11  343.28   26.57
   0  -2 -12  181.69   16.45
   0   2 -12  127.63   13.11
   0   2 -12  206.93   30.07
   0   2  12  203.27   32.79
   0  -2 -13 1673.22   62.38
   0   2 -13 1292.88   50.94
   0   2 -13 2043.55   83.27
   0   2  13 1938.37   75.82
   0  -2 -14   12.80    9.47
   0   2 -14   10.10    7.71
   0   2 -14   12.78   18.32
   0   2  14   12.70   14.25
   0  -2 -15  957.03   52.56
   0   2 -15  774.67   44.89
   0   2 -15 1138.73   70.99
   0   2  15 1100.60   60.30
   0  -2 -16    9.14    4.46
   0   2 -16   10.29    7.37
   0  -2  16   11.21    8.93
   0  -2 -17 2198.91   40.73
   0   2 -17 1883.51   36.60
   0   2  17 2442.92  125.62
   0  -2  17 2573.70  132.96
   0  -2 -18   35.27   19.95
   0   2 -18   26.03    7.23
   0  -2  18   31.11   30.06
   0  -2 -19  768.51   64.73
   0   2 -19  699.50   53.36
   0   2  19  857.98   69.88
   0  -2  19  920.70   72.90
   0  -2 -20  111.60   31.25
   0   2 -20  111.82   18.29
   0   2  20  116.91   27.55
   0  -2  20  135.43   34.35
   0  -2 -21 1048.33  103.46
   0   2 -21  988.39   93.58
   0   2  21 1157.82  110.81
   0  -2  21 1237.67  114.37
   0  -2 -22  126.40   23.29
   0   2 -22  131.65   24.87
   0   2  22  128.84   38.57
   0  -2  22  131.36   44.41
  -1   2   0    4.29    4.35
   1  -2   0    3.71    4.34
   1   2   0    5.16    5.35
  -1  -2   0    1.03    2.26
  -1   2   0    1.25    2.01
   1  -2   0    2.54    2.81
   1   2   0    3.76    3.66
  -1  -2   0    1.46    2.44
  -1  -2  -1 3674.16   61.02
  -1  -2  -2  774.05   15.25
   1   2   2  772.18   15.47
  -1   2  -2  691.49   13.92
   1  -2   2  704.61   15.70
   1   2  -2  764.37   14.59
  -1  -2   2  815.42   15.03
  -1   2   2  844.18   16.89
   1  -2  -2  815.73   16.86
  -1   2   2  860.45   14.65
  -1   2  -2  963.22   18.45
   1  -2   2  936.56   21.44
   1   2  -2  932.02   17.72
  -1  -2   2  909.58   17.29
   1   2   2  560.67   11.99
  -1  -2  -2  671.85   12.61
  -1   2   2  825.82   14.20
  -1   2   3 4040.77   67.73
  -1  -2  -3 4090.26   68.99
   1   2   3 3769.26   63.41
  -1   2  -3 3072.11   52.24
   1   2  -3 3332.71   55.78
   1  -2   3 3229.46   55.92
  -1  -2   3 3800.77   63.44
  -1   2   3 4329.88   72.50
  -1   2  -3 4879.61   81.69
   1  -2   3 4807.30   80.36
   1   2  -3 4539.00   76.12
   1   2   3 4063.53   67.92
  -1  -2  -3 4192.35   69.84
  -1  -2  -4  101.40    6.16
  -1   2   4   96.47    4.45
   1   2   4   91.53    4.71
  -1   2  -4   67.89   10.07
   1   2  -4   73.27    4.59
   1  -2   4   78.25    4.44
  -1  -2   4   97.19    4.10
  -1   2   4  106.71    9.31
  -1   2  -4  124.80    7.22
  -1   2   4  124.41    4.38
   1  -2   4  114.97    6.00
   1   2  -4  103.16    5.95
  -1  -2   4  119.72    7.25
   1   2   4  107.99    5.16
  -1  -2  -4  117.48    5.27
  -1   2   4  118.44    4.46
   1  -2  -5 4214.96   71.07
  -1  -2  -5 3824.27   65.04
  -1   2   5 3529.57   59.76
   1   2   5 3427.28   58.39
   1  -2   5 2819.03   48.46
  -1  -2   5 3374.82   56.96
  -1   2  -5 4773.65   80.72
   1  -2   5 4965.97   83.92
  -1   2   5 4844.78   80.62
   1   2  -5 4778.48   80.79
  -1  -2   5 4927.62   83.25
   1   2   5 4545.05   76.39
  -1  -2  -5 4579.21   76.87
  -1   2   5 4883.03   81.39
   1  -2  -6  215.55    7.20
  -1  -2  -6  203.52    8.40
  -1   2   6  168.04    8.07
   1   2   6  164.18    9.96
  -1   2  -6  105.25    9.02
   1   2  -6  100.46   30.06
   1  -2   6  137.96    6.03
  -1  -2   6  174.04    5.56
   1   2   6  241.45    7.09
  -1   2  -6  236.64    8.86
  -1   2   6  247.88    6.85
   1  -2   6  240.21   10.49
   1   2  -6  266.91    9.23
  -1  -2   6  258.87   13.36
   1   2   6  232.68    8.07
   1  -2  -7 5065.82   82.94
  -1  -2  -7 4437.63   73.48
  -1   2   7 3728.18   61.53
   1   2   7 3719.31   62.00
   1   2  -7 2568.84   43.42
   1  -2   7 3280.35   54.61
  -1  -2   7 3855.84   62.91
   1   2   7 5876.21   95.08
  -1   2   7 5866.77   94.52
   1   2  -7 5922.51   97.74
   1   2   7 5789.79   94.23
  -1   2   7 5840.46   94.22
   1  -2  -8   24.34   17.83
  -1  -2  -8   25.23   24.04
  -1   2   8   15.99    9.13
   1   2  -8   14.30   10.96
  -1   2  -8   14.06   11.89
   1  -2   8   13.03    8.28
  -1  -2   8   15.02    9.35
   1   2   8   26.60    6.74
  -1   2  -8   32.55   15.48
   1   2  -8   29.97   11.62
  -1   2   8   28.16    3.99
   1   2   8   25.54    5.14
  -1   2   8   31.29   19.67
   1  -2  -9 4077.26   65.42
  -1  -2  -9 3647.66   59.82
   1   2  -9 2665.48   44.14
  -1  -2   9 3071.36   50.55
  -1   2  -9 4871.64   79.34
   1   2  -9 4860.13   79.33
   1   2   9 4720.44   76.01
  -1   2   9 4800.40   75.81
   1  -2 -10  244.10   42.25
  -1  -2 -10  221.03   33.59
  -1   2 -10  150.54   18.09
   1   2 -10  175.55   20.17
  -1   2 -10  324.28   37.40
   1   2 -10  305.99   35.18
   1   2  10  272.10   32.12
  -1   2  10  285.04   33.56
   1  -2 -11 1943.68   47.42
  -1  -2 -11 1833.36   39.94
   1   2 -11 1438.55   32.57
  -1   2 -11 1241.66   27.75
  -1   2 -11 2365.39   52.37
   1   2 -11 2421.44   51.97
   1   2  11 2241.63   46.99
  -1   2  11 2288.88   46.43
   1  -2 -12  391.08   33.14
  -1  -2 -12  367.69   31.21
  -1   2 -12  263.40   23.84
   1   2 -12  295.49   25.09
  -1   2 -12  452.09   38.23
   1   2 -12  480.59   39.98
   1   2  12  422.12   42.10
  -1   2  12  465.69   38.92
   1  -2 -13 2083.92   81.55
  -1  -2 -13 1984.38   72.08
   1   2 -13 1698.66   65.80
  -1   2 -13 1483.58   54.79
  -1   2 -13 2478.93   89.70
   1   2 -13 2520.28   98.62
   1   2  13 2354.63   88.10
  -1   2  13 2428.29   87.64
   1  -2 -14  140.91   16.98
  -1  -2 -14  151.85   20.30
   1   2 -14  119.10   17.57
  -1   2 -14  112.40   13.47
   1   2 -14  191.45   26.62
   1   2  14  170.63   36.49
  -1   2  14  175.88   20.99
   1  -2 -15 1605.84   86.95
  -1  -2 -15 1577.44   88.50
   1   2 -15 1377.37   77.21
  -1   2 -15 1182.02   66.77
   1   2 -15 1972.52  106.68
   1   2  15 1790.43   99.75
  -1   2  15 1857.99  101.97
   1  -2  15 1891.35  102.79
   1  -2 -16   22.26   16.97
  -1  -2 -16   22.83   16.90
   1   2 -16   18.68   15.11
  -1   2 -16   18.87   15.49
   1   2 -16   33.81   10.55
   1   2  16   28.09   15.68
  -1   2  16   26.10   10.75
   1  -2 -17  728.87   48.24
  -1  -2 -17  704.82   41.74
   1   2 -17  657.91   36.74
  -1   2 -17  593.17   33.65
   1   2 -17  868.79   49.40
   1   2  17  848.61   47.34
  -1   2  17  850.49   49.28
   1  -2  17  872.82   48.80
   1  -2 -18   91.76   10.61
  -1  -2 -18   77.84   18.07
  -1   2 -18   74.66   21.53
   1   2 -18   84.36    8.98
   1   2  18   89.92   17.63
  -1   2  18   88.67   16.81
  -1  -2  18  106.63   29.22
   1  -2 -19  378.22   30.77
  -1  -2 -19  351.56   29.00
   1   2 -19  320.33   26.46
  -1   2 -19  312.22   30.81
   1   2  19  395.40   33.71
  -1   2  19  396.70   52.89
   1  -2  19  422.75   38.46
  -1  -2  19  433.34   36.06
  -1  -2 -20   93.79   20.37
   1  -2 -20  102.22    9.25
   1   2 -20   94.57   14.79
  -1   2 -20   88.83    9.38
   1   2  20  100.17   28.50
  -1   2  20  122.87   27.36
   1  -2  20  123.28   25.17
  -1  -2  20  117.90   26.63
   1  -2 -21  174.50   28.02
  -1  -2 -21  173.79   28.39
   1   2 -21  164.43   26.01
  -1   2 -21  149.85   24.76
   1   2  21  187.92   33.50
  -1   2  21  197.74   31.73
   1  -2  21  218.98   35.78
  -1  -2  21  210.05   34.10
   1  -2 -22  305.36   36.68
  -1  -2 -22  323.16   42.95
  -1   2 -22  261.81   32.15
   1   2  22  334.70   40.89
  -1   2  22  296.47   35.92
   1  -2  22  333.20   41.06
  -1  -2  22  329.09   40.27
  -2   2   0 2061.61   36.76
   2  -2   0 2033.79   34.92
   2   2   0 1984.84   34.26
  -2  -2   0 2112.45   35.90
   2   2   0 1790.34   31.46
  -2  -2   0 1680.32   29.25
   2  -2   0 2414.70   40.29
  -2   2   0 2363.48   39.38
  -2  -2  -1   78.98   13.40
   2   2   1   84.29    4.92
  -2   2  -1   71.58    4.68
   2  -2   1   68.38    9.01
  -2   2   1   85.21   11.16
   2  -2  -1   79.30    9.29
   2   2  -1   82.93    9.72
  -2  -2   1   78.26    9.47
   2  -2   1   93.72    4.23
   2   2  -1   78.74    9.42
  -2  -2   1   82.06    9.55
   2   2   1   40.57    6.20
  -2  -2  -1   34.09    6.25
  -2   2   1   76.97    8.00
   2  -2   1   90.96   10.48
  -2  -2  -2 4452.87   75.44
   2   2   2 4652.39   77.82
  -2   2  -2 4253.42   71.35
   2  -2   2 3634.30   61.19
   2   2  -2 5067.86   83.67
  -2   2   2 5404.71   89.67
   2  -2  -2 5222.17   86.59
   2  -2   2 5663.10   93.90
  -2  -2   2 4861.47   81.19
   2   2   2 3257.70   55.45
  -2  -2  -2 3651.31   61.21
   2  -2   2 5960.00   98.81
  -2  -2  -3  165.61    6.36
   2   2   3  138.48    5.87
  -2   2  -3  138.94   10.61
   2  -2   3  136.88    5.55
   2   2  -3  166.02    5.91
  -2  -2   3  190.97    5.59
  -2   2   3  198.80    5.50
   2  -2  -3  187.49    5.37
  -2   2  -3  218.72    7.58
   2  -2   3  202.59    6.37
   2  -2  -3  207.01    4.83
  -2   2   3  209.81    4.75
   2   2  -3  199.54   12.78
  -2  -2   3  207.52    6.48
   2   2   3  159.13    6.10
  -2  -2  -3  167.69    5.46
  -2   2   4 1633.74   28.58
  -2  -2  -4 1579.85   28.57
   2   2   4 1472.92   26.84
  -2   2  -4 1158.22   21.84
   2   2  -4 1226.47   21.51
  -2  -2   4 1653.65   28.38
  -2   2   4 1810.66   31.42
  -2   2  -4 2071.83   36.99
   2  -2   4 2088.69   36.73
   2  -2  -4 2050.71   34.75
  -2   2   4 2037.33   34.48
   2   2  -4 1950.61   34.72
  -2  -2   4 1864.45   33.11
   2   2   4 1722.39   30.92
  -2  -2  -4 1782.32   31.29
  -2  -2  -5  355.98    9.29
  -2   2   5  333.52    7.64
   2   2   5  322.30    8.70
  -2   2  -5  234.60    8.17
   2   2  -5  213.05   45.30
   2  -2   5  265.73    7.94
  -2  -2   5  363.64    7.65
  -2   2   5  416.51   12.26
  -2   2  -5  494.86  249.68
   2  -2  -5  450.91   11.83
   2  -2   5  451.76   10.95
   2   2  -5  467.06   15.19
  -2   2   5  465.57    9.49
  -2  -2   5  452.41   11.16
   2   2   5  407.95   10.43
  -2  -2  -5  422.10    9.96
  -2   2   6 2069.13   34.74
  -2  -2  -6 2229.06   40.13
   2   2   6 1987.15   34.63
   2  -2   6 1561.16   27.91
  -2  -2   6 2210.52   37.17
  -2   2  -6 2941.31   50.38
   2  -2  -6 2976.89   50.65
   2  -2   6 2860.37   48.32
   2   2  -6 2825.67   48.63
  -2   2   6 2961.43   48.42
  -2  -2   6 3096.89   51.94
   2   2   6 2742.58   46.40
  -2  -2  -6 2808.48   47.06
   2  -2  -7 1732.85   30.43
  -2  -2  -7 1378.87   45.33
  -2   2   7 1274.86   22.75
   2   2  -7  933.39   17.70
  -2   2  -7  824.79   19.72
   2  -2   7 1040.35   21.25
  -2  -2   7 1366.92   24.33
  -2   2  -7 1994.24   38.21
   2  -2  -7 1899.42   33.14
   2   2  -7 2011.17   36.98
  -2   2   7 1933.76   32.96
   2   2   7 1797.91   32.50
  -2  -2  -7 1861.25   33.19
   2  -2  -8  676.36   17.22
  -2  -2  -8  602.49   68.09
  -2   2   8  493.22   11.02
   2   2  -8  440.60   10.51
  -2   2  -8  360.08   11.99
  -2  -2   8  560.21   13.62
  -2   2  -8  788.78   19.83
   2  -2  -8  808.74   16.28
   2   2  -8  830.37   19.36
  -2   2   8  798.57   15.00
   2   2   8  785.68   16.77
   2  -2  -9  497.84   56.37
  -2  -2  -9  390.43   43.68
  -2   2   9  308.02   34.21
   2   2  -9  310.28   35.51
  -2   2  -9  193.12   47.45
  -2  -2   9  364.14   40.21
   2  -2  -9  552.56   60.99
  -2   2  -9  544.36   61.29
   2   2  -9  539.61   63.91
  -2   2   9  551.55   60.55
   2   2   9  518.53   58.34
   2  -2 -10  724.73   18.59
  -2  -2 -10  588.59   18.14
   2   2 -10  507.81   17.19
  -2   2 -10  380.85   12.03
  -2  -2  10  525.69   14.26
   2  -2 -10  822.16   22.95
   2   2 -10  823.58   28.41
   2   2  10  772.91   24.19
   2  -2  10  847.81   22.13
   2  -2 -11 1415.01   41.49
  -2  -2 -11 1241.56   28.45
   2   2 -11 1164.61   25.92
  -2   2 -11  825.47   25.60
   2  -2 -11 1729.63   36.49
   2   2 -11 1705.53   42.19
   2   2  11 1632.11   36.87
   2  -2  11 1775.19   39.76
   2  -2 -12  362.28   43.03
  -2  -2 -12  325.80   28.16
   2   2 -12  277.37   23.93
  -2   2 -12  227.82   20.12
   2   2 -12  438.79   37.65
   2   2  12  397.25   38.47
   2  -2  12  449.46   39.10
  -2   2  12  410.05   34.22
   2  -2 -13  699.53   33.34
  -2  -2 -13  595.17   25.69
   2   2 -13  556.38   23.09
  -2   2 -13  418.75   19.35
   2   2 -13  783.13   32.00
   2   2  13  699.42   32.74
  -2   2  13  753.58   30.28
   2  -2  13  760.44   36.05
   2  -2 -14   91.15   25.71
  -2  -2 -14   95.29   13.47
   2   2 -14   91.34   12.73
  -2   2 -14   67.55   12.43
   2   2 -14  116.92   16.08
   2   2  14  108.74   24.64
  -2   2  14  117.98   14.71
   2  -2  14  123.69   19.46
   2  -2 -15 1573.54   83.51
  -2  -2 -15 1420.98   76.48
   2   2 -15 1372.11   75.13
  -2   2 -15 1092.27   59.44
   2   2 -15 1876.07  105.35
   2   2  15 1763.67   93.89
  -2   2  15 1751.54  100.91
   2  -2  15 1841.94  105.02
   2  -2 -16  182.63   22.29
  -2  -2 -16  158.28   10.82
   2   2 -16  154.12   21.01
  -2   2 -16  129.64   18.58
   2   2 -16  191.37   24.20
   2   2  16  175.81   21.37
  -2   2  16  199.77   24.72
   2  -2  16  221.70   29.60
   2  -2 -17  876.66   46.96
  -2  -2 -17  727.32   46.02
   2   2 -17  757.02   49.14
  -2   2 -17  615.05   34.82
   2   2 -17  922.74   54.84
   2   2  17  885.49   49.36
   2  -2  17  914.46   59.52
  -2   2  17  889.64   53.28
   2  -2 -18   80.19   10.84
   2   2 -18   75.10   10.26
  -2   2 -18   54.98    8.47
   2   2 -18  104.73   35.02
   2   2  18   81.84   15.64
   2  -2  18  101.32   15.49
  -2   2  18  101.76   22.94
   2  -2 -19 1568.46  117.70
  -2  -2 -19 1423.88  105.96
   2   2 -19 1438.71  108.37
  -2   2 -19 1209.34   94.38
   2   2  19 1604.00  128.62
   2  -2  19 1743.68  129.75
  -2   2  19 1661.04  129.98
  -2  -2  19 1655.79  122.13
   2  -2 -20  145.68   21.95
  -2  -2 -20  140.97   37.05
   2   2 -20  149.77   19.13
  -2   2 -20  112.18   26.30
   2   2  20  163.89   32.46
  -2   2  20  174.11   22.06
  -2  -2  20  162.53   51.91
   2  -2 -21  514.93   52.87
  -2  -2 -21  516.76   52.01
  -2   2 -21  469.75   45.41
   2   2  21  584.21   56.06
   2  -2  21  579.23   56.05
  -2   2  21  572.90   60.96
  -2  -2  21  590.80   59.53
  -2  -2 -22   68.30   26.25
  -2   2 -22   65.64    9.85
   2   2  22   60.90   38.33
  -2   2  22   58.76   37.50
   2  -2  22   75.09   24.76
  -2  -2  22   71.39   19.26
   3   2   0    2.21    3.72
  -3   2   0    3.31    5.13
   3  -2   0    2.52    4.47
   3   2   0    2.64    4.97
   3   2   0    2.45    5.07
  -3  -2   0    5.48    4.13
   3  -2   0    2.26    2.76
  -3   2   0    3.87    3.91
  -3  -2  -1 4537.59   75.91
   3   2   1 4350.21   72.65
  -3   2  -1 4620.38   78.27
   3  -2   1 4413.97   73.91
  -3   2   1 5378.83   91.19
   3  -2  -1 5018.95   83.28
   3   2  -1 5184.53   86.69
  -3  -2   1 4498.29   75.55
   3  -2  -1 2659.43   44.77
   3   2   1 2550.41   44.08
  -3   2   1 3675.31   60.76
   3  -2   1 5661.32   93.82
  -3   2  -1 5414.85   89.79
  -3  -2  -2   67.08    5.07
   3   2   2   68.43    4.60
  -3   2  -2   60.20    4.78
   3  -2   2   52.85    7.12
  -3   2   2   86.16    4.60
   3   2  -2   79.03    9.88
   3  -2  -2   74.39    9.42
  -3  -2   2   80.39    8.59
   3   2  -2   77.54    9.44
   3  -2  -2   81.20    3.32
  -3  -2   2   80.52    9.44
  -3   2   2   54.59    5.91
   3   2   2   42.37    6.89
  -3  -2  -2   44.20    5.98
   3  -2   2   82.99    9.71
  -3   2  -2   79.83    9.13
  -3  -2  -3 5110.76   85.71
   3   2   3 4812.46   80.90
  -3   2  -3 4120.18   69.56
  -3   2   3 6523.54  107.77
   3  -2  -3 5969.08   98.72
   3  -2   3 6983.39  115.95
  -3  -2   3 6758.83  112.75
   3   2   3 4942.51   84.12
  -3  -2  -3 5058.47   84.72
  -3  -2  -4  391.84   13.46
   3   2   4  394.93    9.83
  -3   2  -4  301.49    8.67
   3  -2   4  280.49    8.58
   3   2  -4  318.15    7.61
  -3  -2   4  465.41    8.74
  -3   2   4  494.80   10.09
   3  -2  -4  435.39    9.04
   3  -2   4  529.77   12.00
   3  -2  -4  524.90   10.38
   3   2  -4  511.49   13.96
  -3   2   4  502.52    9.58
  -3  -2   4  449.11   10.17
   3   2   4  430.69   11.24
  -3  -2  -4  427.98   10.02
   3  -2   4  548.13   17.45
  -3   2   5 3168.17   53.46
  -3  -2  -5 2647.56   47.41
   3   2   5 2787.77   48.59
  -3   2  -5 2043.28   40.23
   3  -2   5 2031.71   36.57
  -3  -2   5 3500.89   58.33
  -3   2   5 3775.27   64.11
   3  -2   5 3565.74   61.25
   3  -2  -5 4291.07   71.78
   3   2  -5 4009.53   68.65
  -3   2   5 4098.88   68.47
  -3  -2   5 4107.02   70.02
   3   2   5 3594.41   61.94
  -3  -2  -5 3579.47   61.13
   3  -2   5 4191.21   71.75
  -3   2   6    5.11    2.76
  -3  -2  -6    3.85    2.10
   3   2   6    3.04    2.65
  -3   2  -6    4.69    2.90
   3   2  -6    3.49    2.91
   3  -2   6    3.17    1.94
  -3  -2   6    6.34    4.07
  -3   2   6    5.81    3.31
   3  -2   6    6.34    4.28
   3  -2  -6    7.90    4.69
   3   2  -6    7.84    5.45
  -3   2   6    5.16    4.34
  -3  -2   6    6.07    2.53
   3   2   6    6.70    4.61
  -3  -2  -6    3.71    3.24
   3  -2   6    7.50   11.64
  -3  -2  -7 2152.25   39.35
  -3   2   7 2025.59   35.57
   3   2  -7 1717.10   29.38
  -3   2  -7 1387.14   27.00
  -3  -2   7 2375.79   39.67
   3  -2  -7 3140.58   52.44
   3   2  -7 3245.21   56.22
  -3   2   7 3130.70   52.29
   3   2   7 2783.94   49.01
   3  -2   7 3413.10   59.64
  -3  -2  -8   -3.14   20.93
  -3   2   8    3.97    3.49
   3   2  -8    5.36    4.06
  -3   2  -8    2.70    5.36
  -3  -2   8    6.97    4.42
  -3   2   8    5.03    3.71
   3  -2  -8    4.97    3.85
   3   2  -8    2.67    7.11
  -3   2   8    4.30    2.84
   3   2   8    3.60    5.30
   3  -2   8    2.38    7.41
   3  -2  -9 2745.02   45.17
  -3  -2  -9 2006.34   36.02
   3   2  -9 1836.87   31.64
  -3   2  -9 1297.82   35.20
  -3  -2   9 2140.55   34.58
   3  -2  -9 3030.12   49.90
   3   2  -9 2911.38   50.22
   3   2   9 2713.18   47.45
   3  -2   9 3223.48   55.52
   3  -2 -10  451.54   33.22
  -3  -2 -10  336.20   25.73
  -3   2  10  228.47   20.72
   3   2 -10  322.82   27.95
  -3   2 -10  215.84   19.12
  -3  -2  10  336.13   26.13
   3  -2 -10  490.46   35.97
   3   2 -10  474.94   35.45
   3   2  10  427.62   32.38
   3  -2  10  468.85   42.26
   3  -2 -11 3257.30  120.83
  -3  -2 -11 2530.48   94.59
   3   2 -11 2543.24   93.85
  -3   2 -11 1701.00   65.82
  -3  -2  11 2534.67   92.84
   3  -2 -11 3654.27  134.33
   3   2 -11 3588.49  133.19
   3   2  11 3445.74  129.70
   3  -2  11 3739.94  139.26
   3  -2 -12  438.64  127.38
  -3  -2 -12  379.22   33.13
   3   2 -12  407.02   33.51
  -3   2 -12  269.26   23.22
   3  -2 -12  520.12   45.27
   3   2 -12  540.45   45.10
   3   2  12  496.06   52.82
   3  -2 -13 1663.58   61.98
  -3  -2 -13 1383.59   52.42
   3   2 -13 1386.16   54.97
  -3   2 -13  959.37   42.79
   3  -2 -13 1859.51   71.27
   3   2 -13 1816.09   74.80
   3   2  13 1797.23   66.54
   3  -2  13 1843.05   69.03
   3  -2 -14  472.04   39.22
  -3  -2 -14  393.51   45.02
   3   2 -14  419.63   34.11
  -3   2 -14  312.12   26.67
   3   2 -14  529.70   43.43
   3   2  14  477.91   43.28
   3  -2  14  565.56   47.86
   3  -2 -15 1049.88   63.64
  -3  -2 -15  890.07   55.25
   3   2 -15  915.45   55.31
  -3   2 -15  694.61   44.27
   3   2 -15 1140.44   74.32
   3   2  15 1050.54   66.98
   3  -2  15 1165.14   78.44
  -3   2  15 1130.35   68.27
   3  -2 -16  137.38   16.09
  -3  -2 -16  112.42   20.62
   3   2 -16  119.06   14.85
  -3   2 -16   90.47   12.88
   3   2 -16  145.24   27.53
   3   2  16  147.45   27.60
  -3   2  16  140.81   17.44
   3  -2 -17  530.94   30.09
  -3  -2 -17  426.03   26.11
   3   2 -17  459.60   26.13
  -3   2 -17  349.03   22.67
   3   2 -17  576.86   38.46
   3   2  17  519.61   33.83
   3  -2  17  549.86   39.77
  -3   2  17  543.53   32.20
   3  -2 -18  167.12   21.89
  -3  -2 -18  160.23   23.62
   3   2 -18  165.00   24.57
  -3   2 -18  130.02   18.47
   3   2 -18  204.41   28.68
   3   2  18  193.85   26.62
   3  -2  18  199.46   28.05
  -3   2  18  178.00   23.70
   3  -2 -19  550.10   41.56
  -3  -2 -19  472.00   37.00
   3   2 -19  524.52   39.28
  -3   2 -19  385.09   31.28
   3   2 -19  595.73   45.99
   3   2  19  569.37   47.99
   3  -2  19  566.70   45.16
  -3   2  19  572.19   46.42
  -3  -2 -20   68.31   10.80
   3   2 -20   87.04    8.64
  -3   2 -20   64.11   15.94
   3   2  20   80.30   23.63
   3  -2  20   91.88   35.81
  -3   2  20   90.56   21.49
  -3  -2 -21  183.59   30.42
  -3   2 -21  137.67   36.06
   3   2  21  218.27   35.24
   3  -2  21  236.05   37.90
  -3   2  21  223.80   35.24
  -3  -2  21  225.05   35.94
  -3  -2 -22  202.23   35.92
  -3   2 -22  157.33   29.81
   3   2  22  212.16   37.10
   3  -2  22  220.03   55.37
  -3   2  22  221.09   44.79
  -3  -2  22  234.27   40.53
   4   2   0 1078.49   19.89
  -4   2   0  999.24   21.96
   4  -2   0  938.27   17.54
   4   2   0  731.14   15.06
  -4  -2   0  716.99   14.55
   4  -2   0  861.35   16.04
  -4   2   0  898.37   16.41
  -4  -2  -1   53.10    8.28
   4   2  -1   59.68    6.56
   4   2   1   59.07    8.57
  -4   2  -1   54.37    9.66
   4  -2   1   48.50    8.29
  -4   2   1   55.35   13.13
   4  -2  -1   57.70    7.03
   4   2  -1   57.65    6.73
   4   2  -1   50.64    7.54
  -4  -2   1   46.70    6.47
   4   2   1   29.74    5.98
   4  -2  -1   30.93    6.96
  -4  -2  -1   31.21    5.38
  -4   2   1   38.31    7.45
   4  -2   1   59.62    7.39
  -4   2  -1   59.49    8.07
  -4  -2  -2  670.94   14.05
  -4   2  -2  697.59   14.64
   4  -2   2  627.59   13.00
  -4   2   2  878.17   18.36
   4  -2  -2  828.29   15.28
   4   2  -2  941.16   16.55
   4   2  -2  869.64   17.21
   4  -2  -2  741.53   13.80
  -4  -2   2  839.08   16.58
  -4   2   2  471.79    9.12
   4   2   2  490.42   11.36
  -4  -2  -2  503.33   13.68
   4  -2   2  877.33   19.13
  -4   2  -2  918.02   17.96
  -4  -2  -3   -0.55    4.65
   4   2   3    2.95    2.20
  -4   2  -3    2.55    2.91
   4  -2   3    1.20    2.33
   4   2  -3    4.01    2.49
  -4   2   3    3.34    2.18
   4  -2  -3    2.18    1.83
  -4  -2   3    1.87    1.56
   4  -2  -3    2.89    2.59
   4   2  -3    2.33    4.14
  -4  -2   3    2.28    3.20
  -4   2   3    1.80    1.73
   4   2   3    1.29    1.61
  -4  -2  -3    3.21    2.29
   4  -2   3    2.31    2.87
  -4   2  -3    2.00    3.63
  -4  -2  -4 1139.71   22.19
   4   2   4 1207.41   22.84
  -4   2  -4  945.25   19.17
   4  -2   4  915.32   18.31
   4   2  -4 1068.54   18.39
  -4   2   4 1593.46   28.04
  -4  -2   4 1494.81   25.21
   4  -2  -4 1457.15   25.46
   4  -2  -4 1695.21   29.62
   4   2  -4 1577.69   28.87
  -4  -2   4 1620.79   29.47
  -4   2   4 1591.52   27.54
   4   2   4 1337.25   25.31
  -4  -2  -4 1337.71   24.97
   4  -2   4 1696.43   31.23
  -4   2  -4 1581.97   28.90
  -4   2   5  908.41   16.42
  -4  -2  -5  770.80   17.02
   4   2   5  814.93   16.39
  -4   2  -5  550.43   13.06
   4  -2   5  571.60   15.39
  -4  -2   5 1062.19   17.83
  -4   2   5 1116.59   19.91
   4  -2   5 1143.29   24.65
   4  -2  -5 1161.22   22.23
   4   2  -5 1133.85   22.26
  -4  -2   5 1110.76   23.38
  -4   2   5 1138.65   19.91
   4   2   5  960.27   19.39
  -4  -2  -5  977.45   19.17
   4  -2   5 1117.87   22.21
  -4   2   6 1804.33   30.51
   4   2  -6 1318.80   22.90
  -4   2  -6 1239.42   24.48
  -4  -2   6 2185.99   36.14
  -4   2   6 2239.43   37.31
   4  -2  -6 2553.67   43.98
   4   2  -6 2394.60   42.27
  -4   2   6 2444.48   40.58
  -4  -2   6 2453.14   44.06
   4   2   6 2082.87   38.56
   4  -2   6 2549.68   44.96
  -4   2   7  199.96   15.03
  -4  -2  -7  199.06   27.33
   4   2  -7  188.83   14.03
  -4   2  -7  153.66   25.57
  -4  -2   7  258.19   20.45
  -4   2   7  289.02   21.85
   4  -2  -7  313.05   23.40
   4   2  -7  313.09   24.38
  -4   2   7  298.57   22.02
   4   2   7  279.01   21.68
   4  -2   7  307.91   31.58
  -4  -2  -8  458.15   12.90
  -4   2   8  470.87   10.91
   4   2  -8  501.48   10.32
  -4   2  -8  367.75   12.54
  -4  -2   8  626.82   11.94
  -4   2   8  670.45   13.21
   4  -2  -8  787.80   16.37
   4   2  -8  772.81   27.50
  -4   2   8  777.81   15.27
   4   2   8  683.03   22.50
   4  -2   8  792.83   18.67
  -4  -2  -9 1162.98   48.51
   4   2  -9 1105.08   19.55
  -4   2  -9  746.07   17.42
  -4  -2   9 1236.04   20.83
  -4   2   9 1459.37   27.14
   4  -2  -9 1568.22   29.46
   4   2  -9 1642.35   31.05
  -4   2   9 1595.51   28.10
   4   2   9 1444.07   32.54
  -4  -2 -10  440.88   26.61
   4   2 -10  482.94   11.96
  -4   2  10  327.46   23.71
  -4   2 -10  302.49   23.51
  -4  -2  10  518.86   12.07
  -4   2  10  631.02   17.09
   4  -2 -10  681.28   17.78
   4   2 -10  668.47   22.58
   4   2  10  605.88   17.95
   4  -2  10  659.02   23.26
  -4  -2 -11  347.71   30.09
   4   2 -11  375.88   30.40
  -4   2  11  221.86   18.74
  -4   2 -11  250.71   72.39
  -4  -2  11  398.20   32.17
  -4   2  11  473.95   41.68
   4  -2 -11  527.37   43.19
   4   2 -11  526.31   43.28
   4   2  11  493.36   40.91
   4  -2  11  543.24   45.10
  -4  -2 -12  177.58   23.38
   4   2 -12  196.83   16.30
  -4   2 -12  118.00   15.16
  -4  -2  12  182.88   14.01
  -4   2  12  221.70   19.27
   4  -2 -12  245.46   19.68
   4   2 -12  254.77   30.59
   4   2  12  238.55   21.99
   4  -2  12  253.27   21.36
  -4  -2 -13  921.67   40.33
   4   2 -13 1089.06   44.32
  -4   2 -13  646.15   31.83
   4  -2 -13 1344.40   56.92
   4   2 -13 1358.81   61.38
   4   2  13 1244.99   52.82
   4  -2  13 1318.15   55.27
  -4  -2 -14   73.97   10.44
   4   2 -14   70.17    6.08
  -4   2 -14   54.89   13.04
   4  -2 -14   92.33    9.00
   4   2 -14  101.83   18.63
   4   2  14   97.45   28.24
   4  -2  14  101.22   26.13
  -4  -2 -15  242.55   26.16
   4   2 -15  293.08   29.49
  -4   2 -15  182.46   20.30
   4  -2 -15  349.28   36.38
   4   2 -15  371.40   37.69
   4   2  15  329.90   33.64
   4  -2  15  368.65   39.06
  -4  -2 -16   98.59   23.27
   4   2 -16  112.05   15.22
  -4   2 -16   75.42   24.49
  -4   2  16  111.73   18.47
   4   2 -16  128.32   29.79
   4   2  16  120.55   17.62
   4  -2  16  140.30   39.97
   4   2 -17 1259.31   78.51
  -4  -2 -17 1013.16   65.66
  -4   2 -17  836.64   55.05
  -4   2  17 1218.99   78.13
   4   2 -17 1389.92   94.33
   4   2  17 1303.49   88.70
   4  -2  17 1427.80   91.00
  -4   2  17 1303.89   84.50
  -4  -2 -18   62.32   29.10
   4   2 -18   62.65   18.42
  -4   2 -18   54.33   24.54
  -4   2  18   75.37    7.18
   4   2 -18   90.08   10.71
   4   2  18   82.40   12.75
   4  -2  18   90.80   26.80
  -4   2  18   82.35   23.67
  -4  -2 -19  654.34   57.49
  -4   2 -19  541.57   41.55
   4   2 -19  840.37   64.71
   4   2  19  781.82   65.79
   4  -2  19  830.49   66.96
  -4   2  19  779.52   58.13
  -4  -2 -20   44.80   30.38
  -4   2 -20   34.87   28.65
   4   2 -20   75.54   17.53
   4   2  20   66.33   30.48
   4  -2  20   73.41   39.79
  -4   2  20   70.84   15.46
  -4  -2 -21  819.84   77.16
  -4   2 -21  737.76   69.25
   4   2  21  992.76   94.81
   4  -2  21 1057.15   98.39
  -4   2  21 1020.97   94.24
  -5  -2   0   -0.25    2.59
   5   2   0   -0.40    2.73
  -5   2   0    1.84    4.57
   5  -2   0    0.87    1.82
   5   2   0   -0.63    4.55
  -5  -2   0   -1.70    3.72
   5  -2   0    0.93    2.65
  -5   2   0   -0.70    2.41
  -5  -2  -1 3649.51   61.83
   5   2   1 3519.13   59.54
  -5   2  -1 3459.89   59.11
   5  -2   1 3307.40   56.30
   5  -2  -1 3701.21   62.18
   5   2  -1 3376.56   58.27
  -5  -2   1 3425.59   58.70
   5  -2  -1 2513.11   42.77
  -5  -2  -1 2410.32   42.35
  -5   2   1 2476.91   42.06
   5  -2   1 3745.91   63.37
  -5   2  -1 4065.01   68.62
   5   2  -2  165.57    4.38
  -5  -2  -2  113.58    9.51
   5   2   2  124.09    5.43
  -5   2  -2  121.12    6.49
   5  -2   2  119.34    5.80
  -5   2   2  154.68    4.89
   5  -2  -2  144.79    4.64
   5   2  -2  151.88    4.87
   5   2  -2  137.03    5.97
   5  -2  -2  112.46    4.39
  -5  -2   2  139.18    5.94
   5   2   2   82.51    5.38
  -5   2   2   83.77    3.37
  -5  -2  -2   88.01    4.91
   5  -2   2  151.35    6.34
  -5   2  -2  150.97    5.97
   5   2  -3 3841.06   63.38
  -5  -2  -3 3135.81   54.62
   5   2   3 3485.98   59.73
  -5   2  -3 2843.03   50.84
  -5   2   3 4398.45   73.33
   5   2  -3 4172.01   68.94
   5  -2  -3 4015.35   67.04
   5   2  -3 4283.10   73.45
   5  -2  -3 4203.47   71.07
  -5   2   3 3281.07   55.08
   5   2   3 2950.41   52.16
  -5  -2  -3 2885.01   50.18
   5  -2   3 4593.71   78.51
  -5   2  -3 4456.67   75.60
  -5  -2  -4   77.48   12.52
   5   2   4   94.57   13.65
  -5   2  -4   77.66    7.73
   5  -2   4   67.81    7.29
   5   2  -4   86.94    6.51
  -5   2   4  123.26    9.43
   5  -2  -4  116.05    8.90
   5  -2  -4  134.04   10.69
   5   2  -4  125.59   11.32
  -5  -2   4  110.43   13.88
  -5   2   4  111.22    8.80
   5   2   4   95.06    8.51
  -5  -2  -4   98.20   11.99
   5  -2   4  124.10   11.15
  -5   2  -4  123.69   10.55
  -5  -2  -5 2509.98   48.46
  -5   2  -5 2428.31   42.58
  -5   2   5 4359.72   69.98
  -5  -2   5 4107.37   64.90
   5  -2  -5 3718.20   60.55
   5  -2  -5 4452.73   73.50
   5   2  -5 4344.73   73.81
  -5   2   5 4128.11   67.05
   5   2   5 3736.17   62.72
   5  -2   5 4807.84   80.91
  -5   2   6    8.07    5.57
  -5  -2  -6    4.59    8.99
   5   2  -6    7.06    3.59
  -5   2  -6    8.51    5.54
  -5  -2   6    8.40    4.19
  -5   2   6   10.90    5.32
   5  -2  -6   10.99    6.42
   5   2  -6   17.49   11.55
  -5   2   6    9.80    7.15
   5   2   6   11.64    7.71
   5  -2   6   16.84   11.09
  -5  -2  -7 1252.76   25.73
   5   2  -7 1446.61   22.88
  -5   2  -7 1012.99   21.00
  -5  -2   7 1853.81   29.63
  -5   2   7 1893.55   31.68
   5  -2  -7 1897.07   32.20
   5   2  -7 2042.89   36.31
  -5   2   7 1934.86   31.78
   5   2   7 1695.09   31.12
   5  -2   7 2075.22   41.41
  -5  -2  -8   19.62   20.04
  -5   2   8   16.87    2.49
   5   2  -8   22.74    5.28
  -5   2  -8   18.10   12.02
  -5  -2   8   26.58    3.75
  -5   2   8   27.83    9.78
   5  -2  -8   33.51    4.85
   5   2  -8   29.21   10.46
  -5   2   8   30.00    3.37
   5   2   8   30.73   22.47
   5  -2   8   30.45   19.37
   5   2  -9 2061.29   39.35
  -5   2  -9 1534.35   34.65
  -5  -2   9 2587.58   48.74
  -5   2   9 2847.07   54.41
   5  -2  -9 3113.78   61.10
   5   2  -9 3004.44   60.65
   5   2   9 2776.32   63.68
   5  -2   9 3039.67   61.10
  -5  -2 -10   74.04   10.61
   5   2 -10   96.51    8.30
  -5   2  10   55.11    3.28
  -5   2 -10   59.28    8.42
  -5  -2  10  107.60    8.67
  -5   2  10  112.15    7.42
   5  -2 -10  120.33    7.37
   5   2 -10  123.49    8.43
   5   2  10  111.38   18.82
   5  -2  10   80.47   62.92
  -5  -2 -11 1764.39   67.74
   5   2 -11 2038.85   75.09
  -5   2 -11 1275.58   50.13
  -5  -2  11 2034.23   74.51
  -5   2  11 2357.64   86.83
   5  -2 -11 2566.25   95.73
   5   2 -11 2486.41   93.06
   5   2  11 2386.37   89.86
   5  -2  11 2599.80   97.76
  -5  -2 -12  220.24   22.22
   5   2 -12  321.23   23.50
  -5   2 -12  166.88   17.26
  -5   2  12  151.02   12.45
  -5  -2  12  274.99   19.89
  -5   2  12  337.66   27.43
   5  -2 -12  345.14   28.19
   5   2 -12  361.84   27.38
   5   2  12  319.59   25.70
   5  -2  12  329.62   71.50
   5   2 -13 1603.63   65.34
  -5  -2 -13 1243.39   54.75
  -5   2 -13  911.85   43.70
  -5  -2  13 1473.74   58.04
  -5   2  13 1717.38   68.19
   5  -2 -13 1886.29   77.25
   5   2 -13 1878.87   76.19
   5   2  13 1745.86   76.29
   5  -2  13 1836.71   80.63
   5   2 -14  350.72   35.25
  -5  -2 -14  286.05   30.58
  -5   2 -14  212.87   23.49
  -5   2  14  373.40   37.31
   5  -2 -14  414.04   41.33
   5   2 -14  433.15   46.34
   5   2  14  384.48   42.04
   5  -2  14  392.56   41.41
   5   2 -15  461.03   28.59
  -5  -2 -15  385.83   18.40
  -5   2 -15  286.93   30.63
  -5   2  15  526.62   32.46
   5  -2 -15  557.97   54.35
   5   2 -15  552.73   56.24
   5   2  15  524.02   51.49
   5  -2  15  556.31   55.04
   5   2 -16  224.57   27.31
  -5  -2 -16  192.61   29.53
  -5   2 -16  142.30   19.77
  -5   2  16  233.85   31.39
   5  -2 -16  267.20   34.35
   5   2 -16  269.56   34.12
   5   2  16  249.43   33.75
   5  -2  16  247.54   32.55
   5   2 -17  533.95   34.73
  -5  -2 -17  406.48   30.02
  -5   2 -17  324.37   42.89
  -5   2  17  510.11   34.01
   5  -2 -17  501.53   55.74
   5   2 -17  555.11   61.60
   5   2  17  517.10   61.26
   5  -2  17  549.20   21.81
  -5  -2 -18  194.02   27.49
  -5   2 -18  154.66   22.25
  -5   2  18  234.83   30.44
   5   2 -18  275.16   36.64
   5   2  18  241.60   32.94
   5  -2  18  267.73   36.99
  -5   2  18  244.10   32.47
  -5  -2 -19  236.24   31.03
  -5   2 -19  190.92   25.98
   5   2 -19  330.28   41.29
   5   2  19  294.79   41.34
   5  -2  19  315.29   41.03
  -5   2  19  311.15   45.34
  -5  -2 -20  115.68   28.00
  -5   2 -20  113.70   16.55
   5   2 -20  165.59   22.19
   5   2  20  158.54   22.80
   5  -2  20  181.79   34.24
  -5   2  20  153.56   19.63
  -5  -2 -21  215.69   29.97
  -5   2 -21  179.51   28.26
   5   2 -21  280.05   37.81
   5   2  21  267.85   35.35
   5  -2  21  277.76   49.49
  -5   2  21  254.89   32.79
  -6  -2   0 2322.03   40.30
   6   2   0 2280.99   39.32
  -6   2   0 2316.15   40.40
   6  -2   0 2209.28   38.33
   6   2   0 1753.37   32.35
  -6  -2   0 1706.81   33.90
   6  -2   0 1904.36   33.82
  -6   2   0 2117.07   36.94
  -6  -2   1   36.97    4.70
  -6  -2  -1   36.06    9.90
   6   2  -1   37.10   10.40
   6   2   1   35.32    8.24
  -6   2  -1   32.17    4.99
  -6   2   1   38.67    8.72
   6  -2   1   29.43   20.10
   6  -2  -1   32.38    4.32
   6   2  -1   34.12    6.53
   6  -2  -1   21.90    7.33
  -6  -2   1   34.94    4.96
   6   2   1   26.57    5.24
  -6  -2  -1   29.95    9.49
   6  -2   1   37.78   11.65
  -6   2   1   24.54    3.84
  -6   2  -1   36.68    5.02
  -6  -2  -2 1075.77   21.48
   6   2  -2 1231.76   21.01
  -6   2  -2  875.60   18.85
  -6   2   2 1287.06   22.87
   6  -2  -2 1277.95   22.61
   6   2  -2 1338.89   22.94
   6   2  -2 1241.69   25.08
   6  -2  -2  942.54   18.98
  -6  -2   2 1256.80   23.49
   6   2   2  769.29   16.58
  -6   2   2  819.51   15.23
  -6  -2  -2  826.37   16.52
   6  -2   2 1381.67   25.52
  -6   2  -2 1337.90   26.98
  -6  -2  -3   83.94   18.91
   6   2  -3  115.57    8.74
   6   2   3   99.77    9.13
  -6   2  -3  100.23   12.88
   6  -2   3   70.96   10.11
  -6   2   3  134.44   10.44
   6  -2  -3  130.15   10.03
   6   2  -3  132.60    9.98
   6   2  -3  136.71   12.16
   6  -2  -3  124.62   10.00
  -6  -2   3  129.08   10.91
  -6   2   3   93.21    8.29
   6   2   3   86.00    9.10
  -6  -2  -3   87.00    8.07
   6  -2   3  141.40   12.39
  -6   2  -3  129.32   10.66
  -6  -2  -4  349.51   12.70
   6   2  -4  439.00    7.70
   6   2   4  376.93   14.19
  -6   2  -4  338.40   12.37
  -6   2   4  528.23   12.56
   6  -2  -4  466.24    9.35
   6  -2  -4  516.34   15.89
   6   2  -4  514.34   14.12
  -6   2   4  444.29    9.98
   6   2   4  400.69   11.72
   6  -2   4  556.15   14.51
  -6   2  -4  507.72   14.01
  -6  -2  -5    3.19    4.55
  -6   2  -5    5.01    4.04
  -6   2   5    6.42    4.04
   6  -2  -5    5.54    4.24
   6  -2  -5    9.80    8.03
   6   2  -5    8.06    6.87
  -6   2   5    7.44    5.75
   6   2   5    6.87    3.27
   6  -2   5    8.13    9.86
  -6  -2  -6  705.05   15.53
  -6   2   6 1214.99   28.29
   6  -2  -6 1226.78   22.07
   6   2  -6 1184.29   23.87
  -6   2   6 1158.91   21.57
   6   2   6 1008.13   21.04
   6  -2   6 1151.89   25.09
  -6  -2  -7  702.06   21.23
  -6   2   7 1165.44   20.36
  -6  -2   7 1115.80   17.23
   6  -2  -7 1208.20   22.31
   6   2  -7 1156.38   23.51
  -6   2   7 1162.24   21.10
   6   2   7 1051.74   29.43
   6  -2   7 1150.73   24.46
   6   2  -8  370.01   41.01
  -6   2   8  284.19   31.28
  -6  -2  -8  279.87   34.35
  -6   2  -8  240.37   27.94
  -6  -2   8  437.94   47.74
  -6   2   8  452.52   49.85
   6  -2  -8  481.61   53.23
   6   2  -8  452.84   50.50
  -6   2   8  460.93   50.79
   6   2   8  385.99   43.86
   6  -2   8  477.20   53.71
   6   2  -9  594.67   12.86
  -6  -2  -9  404.94   31.14
  -6   2   9  418.94   10.56
  -6   2  -9  355.14   14.63
  -6  -2   9  672.73   13.72
  -6   2   9  732.08   17.62
   6  -2  -9  738.94   21.79
   6   2  -9  727.09   18.72
   6   2   9  647.35   22.79
   6  -2   9  763.62   20.88
   6   2 -10  912.89   34.28
  -6  -2 -10  605.82   26.41
  -6   2  10  548.54   21.50
  -6   2 -10  560.58   28.12
  -6  -2  10  950.91   35.30
  -6   2  10 1004.50   37.87
   6  -2 -10 1055.77   43.42
   6   2 -10 1054.92   44.63
   6   2  10  969.95   39.32
   6  -2  10 1038.97   42.65
  -6  -2 -11  821.50   63.46
  -6   2 -11  680.09   32.11
  -6  -2  11 1150.66   40.82
  -6   2  11 1268.38   45.81
   6  -2 -11 1318.77   51.19
   6   2 -11 1372.91   51.43
   6   2  11 1223.54   57.03
   6  -2  11 1151.59   45.11
   6   2 -12  582.57   45.72
  -6  -2 -12  450.81   38.58
  -6   2 -12  367.22   31.05
  -6   2  12  385.58   30.90
  -6  -2  12  597.43   46.63
  -6   2  12  691.25   55.45
   6  -2 -12  685.78   54.74
   6   2 -12  693.19   59.02
   6   2  12  648.45   53.08
   6  -2  12  658.77   60.05
   6   2 -13  200.30   16.81
  -6  -2 -13  137.03   18.01
  -6   2 -13  138.86   52.48
  -6   2  13  209.11   17.75
   6  -2 -13  214.03   22.78
   6   2 -13  209.00   23.38
   6   2  13  200.55   19.86
   6  -2  13  197.48   24.12
   6   2 -14  338.66   32.58
  -6  -2 -14  247.79   26.59
  -6   2 -14  204.40   22.86
  -6   2  14  361.95   34.99
   6  -2 -14  369.65   40.65
   6   2 -14  390.27   41.90
   6   2  14  333.73   34.59
   6  -2  14  382.72   39.85
   6   2 -15 1036.96   59.53
  -6  -2 -15  749.13   46.36
  -6   2 -15  595.54   37.56
  -6   2  15 1057.38   61.12
   6  -2 -15 1084.24   71.38
   6   2 -15 1145.57   68.00
   6   2  15 1059.89   64.06
   6  -2  15 1122.38   67.22
   6   2 -16  353.44   19.85
  -6  -2 -16  257.75   19.54
  -6   2 -16  201.90   12.90
  -6   2  16  337.33   20.33
   6  -2 -16  349.05   24.72
   6   2 -16  374.25   28.39
   6   2  16  342.11   22.88
   6  -2  16  339.57   38.10
  -6  -2 -17  389.61   28.79
  -6   2 -17  322.20   22.76
   6  -2 -17  558.53   38.85
   6   2 -17  570.65   38.82
   6   2  17  516.52   34.92
   6  -2  17  568.84   41.52
  -6  -2 -18   55.53   15.87
  -6   2 -18   53.16    7.58
   6  -2 -18   70.74   21.44
   6   2 -18   93.73   18.72
   6   2  18   84.03   36.03
   6  -2  18   82.29   21.05
  -6  -2 -19  760.30   58.94
  -6   2 -19  671.40   50.58
   6   2 -19 1042.95   82.73
   6   2  19 1020.97   77.81
   6  -2  19 1105.14   86.44
  -6   2  19 1022.69   78.90
  -6  -2 -20   12.09   13.18
  -6   2 -20    5.62    6.50
   6   2 -20   16.94   15.32
   6   2  20   14.67   11.21
   6  -2  20   18.77   15.48
  -6   2  20    7.45   13.52
  -6  -2 -21  330.73   30.15
  -6   2 -21  280.17   24.78
   6   2 -21  462.23   37.48
   6   2  21  442.04   38.24
   6  -2  21  444.38   38.29
  -6   2  21  415.13   32.36
  -7  -2   0   -1.11    2.99
   7   2   0    0.53    1.61
  -7   2   0    0.64    1.29
   7  -2   0    1.33    1.52
   7   2   0    1.35    4.13
   7  -2   0    1.68    2.16
  -7  -2   0    0.86    2.42
  -7   2   0    0.95    3.52
  -7  -2   1 3771.50   61.20
  -7  -2  -1 3371.85   56.00
   7   2  -1 3562.19   57.73
   7   2   1 3717.42   61.09
  -7   2  -1 3350.48   56.15
  -7   2   1 4084.25   66.68
   7  -2  -1 3711.46   60.52
   7   2  -1 3307.55   57.12
   7  -2  -1 3077.39   53.47
   7   2   1 3135.86   53.69
   7  -2   1 3661.72   62.20
  -7   2  -1 3607.37   59.57
  -7  -2   2  165.35   12.40
  -7  -2  -2  118.94   15.02
   7   2  -2  128.45   10.27
   7   2   2  135.08   31.75
  -7   2  -2  121.73   10.41
  -7   2   2  150.75   12.65
   7  -2   2  100.13    8.83
   7  -2  -2  137.16   14.24
   7   2  -2  137.29   13.11
   7  -2  -2  101.65   11.72
   7   2   2   99.99   12.04
  -7   2   2   96.90    8.97
   7  -2   2  148.28   12.79
  -7   2  -2  147.18   17.08
  -7  -2  -3 2111.36   37.24
   7   2   3 2607.32   44.89
   7   2  -3 2668.71   42.83
  -7   2   3 3410.33   55.66
   7  -2  -3 3220.84   60.20
   7   2  -3 3373.76   53.89
   7   2  -3 3401.47   72.95
   7  -2  -3 2961.18   52.06
  -7   2   3 2216.16   37.39
   7  -2   3 3620.44   61.53
  -7  -2  -4  262.73   21.57
  -7   2  -4  254.02    9.53
   7   2  -4  246.43    4.52
  -7   2   4  402.77   12.02
   7  -2  -4  374.17   10.10
   7  -2  -4  379.27   12.13
   7   2  -4  399.30   17.47
  -7   2   4  303.78    8.49
   7   2   4  254.56   20.23
   7  -2   4  393.81   12.81
  -7  -2  -5 1192.45   23.38
  -7   2   5 2110.87   34.09
   7  -2  -5 1862.69   29.44
   7  -2  -5 2090.09   34.63
   7   2  -5 2131.66   42.77
  -7   2   5 1803.65   31.42
   7   2   5 1634.33   34.51
   7  -2   5 2013.22   38.12
  -7  -2  -6   96.68   14.45
  -7   2  -6  119.77   15.86
  -7   2   6  206.79   23.35
   7  -2  -6  211.42   24.09
   7   2  -6  202.41   26.41
  -7   2   6  180.46   22.46
   7   2   6  172.90   27.80
   7  -2   6  210.66   25.13
  -7  -2  -7 2244.12   49.58
  -7   2  -7 2166.78   41.56
  -7   2   7 3936.67   61.32
   7  -2  -7 3962.16   63.35
   7   2  -7 3857.97   63.43
   7   2   7 3322.29   55.74
   7  -2   7 3780.91   67.94
  -7   2   8    6.33    4.20
  -7  -2  -8   -0.59   37.97
  -7   2  -8    4.90    3.81
  -7   2   8    9.84    5.57
   7   2  -8    9.26    7.28
  -7   2   8    8.80    7.80
   7   2   8   11.47    5.52
   7  -2   8   13.10    7.26
  -7  -2  -9 1177.65   48.26
  -7   2   9 1102.05   40.74
  -7   2  -9  995.41   44.89
  -7   2   9 1962.60   71.84
  -7  -2   9 1928.22   69.68
  -7  -2   9 1898.66   68.62
   7  -2  -9 2023.98   76.29
   7   2  -9 1970.85   74.26
   7   2   9 1751.82   71.13
   7  -2   9 1972.75   76.12
   7   2 -10    6.16    3.18
  -7  -2 -10    2.85    4.43
  -7   2  10    1.95    3.26
  -7   2 -10   -0.35    7.52
  -7  -2  10    6.68    3.27
  -7   2  10    8.03    4.72
   7  -2 -10    7.48    4.68
   7   2 -10   10.98    6.00
   7   2  10   10.66    6.38
   7  -2  10    3.97    6.83
   7   2 -11 1852.52   64.70
  -7  -2 -11 1144.89   54.51
  -7   2 -11 1050.79   41.43
  -7  -2  11 1730.98   60.42
  -7   2  11 1844.62   65.15
   7  -2 -11 1852.96   67.33
   7   2 -11 1896.39   71.61
   7   2  11 1715.94   67.10
   7  -2  11 1963.41   76.42
   7   2 -12   28.42    5.64
  -7  -2 -12   30.80   21.02
  -7   2 -12   33.11   20.17
  -7   2  12   19.39    7.84
  -7  -2  12   44.18    2.37
  -7   2  12   49.85    4.94
   7  -2 -12   55.35    8.64
   7   2 -12   50.71   12.06
   7   2  12   48.13   14.49
   7  -2  12   26.38   18.97
   7   2 -13  645.53   34.07
  -7  -2 -13  406.51   26.18
  -7   2 -13  328.43   36.12
  -7   2  13  635.35   35.61
   7  -2 -13  645.74   14.74
   7   2 -13  638.25   65.43
   7   2  13  583.54   34.53
   7  -2  13  623.48   61.06
   7   2 -14  455.93    8.99
  -7  -2 -14  288.53   30.59
  -7   2 -14  239.01   25.71
  -7   2  14  413.70   39.64
   7  -2 -14  438.38   44.71
   7   2 -14  439.32   43.55
   7   2  14  403.11   41.09
   7  -2  14  397.45   39.93
  -7  -2 -15  497.28   38.41
  -7   2 -15  442.57   28.72
  -7   2  15  824.26   47.92
   7  -2 -15  775.82   46.36
   7   2 -15  812.55   53.34
   7   2  15  711.79   44.25
   7  -2  15  788.72   49.55
  -7  -2 -16  171.78   22.24
  -7   2 -16  144.49   18.70
   7  -2 -16  259.83   35.81
   7   2 -16  262.35   30.96
   7   2  16  223.48   27.23
   7  -2  16  257.30   34.84
  -7  -2 -17  229.85   31.32
  -7   2 -17  188.07   35.11
   7  -2 -17  334.74   41.59
   7   2 -17  379.58   47.91
   7   2  17  333.42   42.86
   7  -2  17  370.69   47.37
  -7  -2 -18  232.87   30.06
  -7   2 -18  196.99   27.50
   7  -2 -18  330.51   42.18
   7   2 -18  333.11   41.55
   7   2  18  294.25   51.62
   7  -2  18  333.45   42.33
  -7  -2 -19  228.70   28.22
  -7   2 -19  198.40   25.02
   7  -2 -19  324.89   36.83
   7   2 -19  346.41   41.13
   7   2  19  317.25   37.10
   7  -2  19  324.68   42.74
  -7  -2 -20   83.96   26.65
  -7   2 -20   59.21   17.17
   7   2 -20  121.94   13.36
   7   2  20   97.53   24.94
   7  -2  20  105.78   33.77
  -7   2  20  104.25   28.52
  -7  -2 -21  110.04   27.03
  -7   2 -21   98.24   18.45
   7   2 -21  178.91   32.24
   7   2  21  154.00   38.52
   7  -2  21  188.82   34.87
  -7   2  21  155.97   27.20
   8   2   0  782.00   15.34
  -8   2   0  791.17   19.13
   8  -2   0  757.63   54.57
   8   2   0  662.52   17.74
   8  -2   0  659.40   17.40
  -8   2   0  621.76   13.31
  -8  -2   1   99.32   11.71
  -8  -2  -1   88.85    9.54
   8   2  -1   95.45   12.30
   8   2   1   93.34   11.53
  -8   2  -1   96.56   12.11
  -8   2   1  101.69   12.12
   8  -2   1  111.99   26.19
   8  -2  -1  171.37   53.84
   8   2  -1  106.36   47.19
   8   2   1   96.76   15.66
   8  -2  -1  100.71   15.09
   8  -2   1   90.67   11.64
  -8   2   1   87.36   11.07
  -8   2  -1   98.91   11.85
  -8  -2   2  237.54   26.25
  -8  -2  -2  184.91   22.60
   8   2   2  190.04   21.54
   8   2  -2  171.35   19.65
  -8   2  -2  172.97   20.05
  -8   2   2  207.20   24.79
   8  -2   2  178.09   27.92
   8  -2  -2  254.47   44.84
   8   2  -2  215.07   49.17
   8  -2  -2  142.90   44.43
   8   2   2  175.05   21.08
  -8   2   2  168.57   19.12
   8  -2   2  214.32   24.68
  -8   2  -2  220.64   24.85
  -8  -2  -3   94.59   12.76
  -8   2  -3  114.45   13.97
   8   2  -3  108.86   12.49
  -8   2   3  147.60   17.21
   8  -2  -3  137.89   40.77
   8   2  -3  144.93   16.29
   8   2  -3  118.49   17.68
   8  -2  -3  117.30   19.24
  -8   2   3  100.43   11.88
   8   2   3   99.26   13.59
   8  -2   3  145.69   17.51
  -8  -2  -4   30.88    5.27
  -8   2  -4   27.44   15.75
   8   2  -4   30.58    1.75
  -8   2   4   38.27    4.74
   8  -2  -4   43.69    3.62
   8   2  -4   41.77    6.54
   8  -2  -4   45.92   33.15
  -8   2   4   37.78    5.92
   8   2   4   37.46   21.74
   8  -2   4   42.22   20.21
  -8  -2  -5  137.54   17.79
  -8   2  -5  145.63   23.39
  -8   2   5  222.36   24.93
   8  -2  -5  206.74   22.93
   8   2  -5  222.83   26.00
   8  -2  -5  227.73   25.83
  -8   2   5  185.82   21.83
   8   2   5  183.58   21.98
   8  -2   5  231.49   30.37
  -8  -2  -6  151.32   13.91
  -8   2  -6  162.55   14.45
  -8   2   6  234.65   17.82
   8  -2  -6  199.25   14.43
   8  -2  -6  240.42   22.84
   8   2  -6  232.34   18.66
  -8   2   6  206.30   16.70
   8   2   6  205.65   17.33
   8  -2   6  244.42   29.84
  -8   2   7  137.33   10.31
  -8  -2  -7   92.10   27.43
  -8   2  -7  127.61   12.59
  -8   2   7  190.34   14.23
   8  -2  -7  202.41   16.49
   8   2  -7  199.63   16.96
  -8   2   7  192.67   14.89
   8   2   7  173.37   15.56
   8  -2   7  203.09   17.88
  -8   2   8   58.45    4.06
  -8  -2  -8   56.89   11.41
  -8   2  -8   58.28    5.87
  -8   2   8   99.75    3.90
   8  -2  -8   95.47    6.52
   8   2  -8   97.87    8.63
   8   2   8   94.98   21.88
   8  -2   8  107.46    9.75
  -8  -2  -9  869.45   36.49
  -8   2   9  949.94   35.13
  -8   2  -9  925.59   38.02
  -8   2   9 1578.87   58.60
   8  -2  -9 1625.24   61.45
   8   2  -9 1543.48   59.06
   8   2   9 1412.14   55.12
   8  -2   9 1615.84   69.03
  -8  -2 -10  373.65   19.36
  -8   2  10  347.15   24.10
  -8   2 -10  354.29   18.46
  -8   2  10  603.76   22.75
   8  -2 -10  590.32   21.32
   8   2 -10  592.20   16.94
   8   2  10  531.88   24.07
   8  -2  10  582.32   18.15
  -8  -2 -11  183.04   22.52
  -8   2 -11  213.97   21.74
  -8   2  11  191.17   15.54
  -8   2  11  332.56   26.31
   8  -2 -11  323.27   26.84
   8   2 -11  334.92   35.27
   8   2  11  301.82   27.12
   8  -2  11  314.12   35.91
  -8  -2 -12  226.46   27.53
  -8   2 -12  258.00   27.48
  -8   2  12  409.74   39.20
  -8  -2  12  407.03   38.39
   8  -2 -12  406.65   40.09
   8   2 -12  402.61   40.14
   8   2  12  385.31   39.00
   8  -2  12  408.00   42.34
  -8  -2 -13  454.96   31.29
  -8   2 -13  491.75   33.63
  -8   2  13  758.54   45.11
   8  -2 -13  736.66   48.80
   8   2 -13  752.76   51.22
   8   2  13  660.37   42.98
   8  -2  13  735.03   47.67
  -8  -2 -14  214.06   28.04
  -8   2 -14  195.15   24.55
   8  -2 -14  323.63   36.92
   8   2 -14  343.15   41.11
   8   2  14  295.63   35.77
   8  -2  14  321.48   38.84
  -8  -2 -15  332.14   23.01
  -8   2 -15  322.66   21.83
   8  -2 -15  549.30   31.30
   8   2 -15  556.48   33.08
   8   2  15  499.22   30.29
   8  -2  15  531.15   32.39
  -8  -2 -16  128.03   24.31
  -8   2 -16  139.90   20.21
   8  -2 -16  215.19   28.10
   8   2 -16  211.23   39.04
   8   2  16  202.78   31.12
   8  -2  16  217.37   34.47
  -8  -2 -17  536.79   46.25
  -8   2 -17  517.05   41.11
   8  -2 -17  806.55   63.10
   8   2 -17  868.56   66.31
   8   2  17  788.31   63.98
   8  -2  17  867.11   66.87
  -8  -2 -18   37.53   31.80
  -8   2 -18   35.69   22.52
   8  -2 -18   62.80   22.20
   8   2 -18   58.02   27.75
   8   2  18   60.69   30.75
   8  -2  18   52.94   38.46
  -8  -2 -19  189.23   32.84
  -8   2 -19  169.84   21.55
   8  -2 -19  299.36   34.95
   8   2 -19  307.42   37.59
   8   2  19  295.59   35.53
   8  -2  19  314.07   37.95
  -8  -2 -20    2.24    4.88
  -8   2 -20    3.14    2.82
   8   2 -20    1.99    4.97
   8   2  20   -2.41    9.48
   8  -2  20   -3.33    9.88
  -9  -2   0   -1.81    3.94
   9   2   0    0.52    1.59
  -9   2   0    0.52    2.07
   9  -2   0   -2.80    3.26
   9   2   0   -0.82    7.20
   9  -2   0    1.96    2.38
  -9   2   0   -0.97    3.05
  -9  -2   1 2378.28   38.43
  -9  -2  -1 2115.70   40.27
  -9   2  -1 2185.39   37.97
  -9   2   1 2373.04   38.81
   9   2  -1 2061.36   37.34
   9  -2  -1 2291.48   39.01
   9   2   1 2231.00   40.75
   9  -2   1 2141.95   39.29
  -9   2   1 2172.72   36.15
  -9  -2   2   19.89    9.11
  -9  -2  -2   12.81    8.57
   9   2   2   18.03    5.53
  -9   2  -2   18.11   12.93
   9   2  -2   13.89    3.85
  -9   2   2   14.89    6.68
   9  -2  -2   33.05   16.44
   9   2  -2   21.10   13.03
   9  -2  -2   20.70   13.63
   9   2   2   19.95   13.77
   9  -2   2   21.11   12.76
  -9   2   2   15.02   10.85
  -9  -2  -3 1693.49   30.43
  -9   2  -3 1660.98   30.32
   9   2  -3 1871.29   29.41
  -9   2   3 2159.52   34.96
   9  -2  -3 2096.52   35.48
   9   2  -3 2197.83   34.37
   9   2  -3 2030.66   43.34
   9  -2  -3 1806.24   32.86
   9   2   3 1743.17   35.94
  -9   2   3 1567.61   27.19
   9  -2   3 2255.68   39.05
  -9  -2  -4  146.59   21.44
  -9   2  -4  156.33   18.92
  -9   2   4  194.08   21.89
   9   2  -4  160.77   17.64
   9  -2  -4  192.71   21.47
   9   2  -4  210.79   23.23
   9  -2  -4  193.12   22.08
   9   2  -4  199.30   23.42
   9   2   4  156.79   19.10
  -9   2   4  150.61   17.22
   9  -2   4  214.74   29.06
  -9  -2  -5 1672.94   36.75
  -9   2   5 2151.27   40.95
   9  -2  -5 2157.97   40.83
   9  -2  -5 2461.25   52.74
   9   2  -5 2359.74   48.09
  -9   2   5 1920.25   38.57
   9   2   5 1983.80   41.90
   9  -2   5 2501.95   51.40
  -9  -2  -6    6.93    9.02
  -9   2  -6   39.24    5.65
  -9   2   6   63.08    5.19
   9  -2  -6   64.64    2.79
   9  -2  -6   70.44    6.16
   9   2  -6   65.42    6.96
  -9   2   6   58.13    6.96
   9   2   6   55.54    9.93
   9  -2   6   72.36   15.32
  -9  -2  -7 1253.63   54.16
  -9   2  -7 1375.40   53.10
  -9   2   7 1895.14   69.06
   9  -2  -7 2102.07   78.71
   9   2  -7 2018.47   79.17
   9   2   7 1708.84   65.25
   9  -2   7 1941.24   73.94
  -9   2   8   23.94    4.05
  -9  -2  -8   21.37   21.57
  -9   2  -8   33.07   23.38
  -9   2   8   46.60    3.05
   9  -2  -8   50.48    7.87
   9   2  -8   43.02   17.30
   9   2   8   40.90   12.97
   9  -2   8   43.78    6.51
  -9  -2  -9 1370.28   57.79
  -9   2  -9 1531.67   57.24
  -9   2   9 2236.14   78.04
   9  -2  -9 2392.93   85.59
   9   2  -9 2276.40   84.05
   9   2   9 2054.92   76.46
   9  -2   9 2327.73   86.42
  -9  -2 -10   -1.41   15.36
  -9   2  10    1.14    1.21
  -9   2 -10    1.64    5.36
  -9   2  10    3.34    2.17
   9  -2 -10    3.40    4.53
   9   2 -10    1.36    4.18
   9   2  10    0.74    6.43
   9  -2  10   -2.70    9.32
  -9  -2 -11  477.37   23.54
  -9   2 -11  576.85   30.25
  -9   2  11  884.63   35.21
   9  -2 -11  889.62   39.62
   9   2 -11  886.03   39.81
   9   2  11  786.85   35.78
   9  -2  11  869.29   43.77
  -9  -2 -12   67.35   32.33
  -9   2 -12   65.33   21.31
  -9   2  12  101.10    4.09
   9  -2 -12   96.76    7.48
   9   2 -12  103.27    9.88
   9   2  12   83.29   20.03
   9  -2  12   90.16   17.44
  -9  -2 -13  368.10   42.84
  -9   2 -13  407.13   34.12
   9  -2 -13  660.84   73.13
   9   2 -13  664.03   74.06
   9   2  13  588.26   19.51
   9  -2  13  638.94   72.07
  -9  -2 -14  118.20   19.10
  -9   2 -14  124.99   19.52
   9  -2 -14  178.87   22.70
   9   2 -14  178.16   34.25
   9   2  14  170.88   27.24
   9  -2  14  193.32   27.71
  -9  -2 -15  161.46   22.13
  -9   2 -15  160.58   27.94
   9  -2 -15  250.86   28.75
   9   2 -15  268.88   31.81
   9   2  15  245.85   38.64
   9  -2  15  245.29   36.67
  -9  -2 -16  106.97   36.25
  -9   2 -16   94.88   32.49
   9  -2 -16  136.93   17.16
   9   2 -16  161.43   22.36
   9   2  16  132.58   30.35
   9  -2  16  154.61   23.36
  -9  -2 -17  276.78   35.70
  -9   2 -17  283.01   36.29
   9  -2 -17  437.24   52.51
   9   2 -17  418.21   54.26
   9   2  17  398.95   49.44
   9  -2  17  444.30   54.82
  -9  -2 -18  144.44   22.83
  -9   2 -18  125.82   18.25
   9  -2 -18  189.81   22.82
   9   2 -18  189.13   24.08
   9   2  18  188.00   48.88
   9  -2  18  196.21   26.76
  -9  -2 -19   95.71   30.43
  -9   2 -19   85.10   11.12
   9  -2 -19  150.45   11.19
   9   2 -19  139.53   28.07
   9   2  19  129.72   22.51
   9  -2  19  143.38   45.28
  -9  -2 -20   47.80   10.62
  -9   2 -20   30.54   32.75
   9  -2 -20   63.59    8.12
   9   2 -20   74.46   11.69
   9   2  20   62.28   23.44
   9  -2  20   59.53   23.94
  10   2   0  561.61   13.27
 -10   2   0  566.81   19.77
  10  -2   0  564.84   13.86
  10   2   0  603.26   19.82
  10  -2   0  614.24   20.29
 -10  -2   1   42.36   15.06
  10   2  -1   52.08    4.62
 -10   2   1   53.84    5.14
 -10   2  -1   54.52    8.18
  10   2   1   45.61    7.50
  10  -2  -1   44.20    4.39
  10   2  -1   52.75    9.51
  10   2   1   53.23   14.21
  10  -2  -1   55.68    6.11
  10  -2   1   47.37   11.37
 -10  -2   2  250.87   19.56
 -10  -2  -2  266.24   20.21
 -10   2  -2  204.53   25.97
  10   2  -2  235.62   17.24
 -10   2   2  245.85   18.28
  10  -2  -2  234.35   17.39
  10   2  -2  214.47   21.25
  10  -2  -2  238.61   18.54
  10   2   2  243.30   19.78
  10  -2   2  243.64   27.69
 -10  -2  -3   33.71   27.94
 -10   2  -3   55.55    6.39
 -10   2   3   54.63    6.39
  10   2  -3   57.71    3.53
  10  -2  -3   59.09    3.58
  10   2  -3   52.72    9.85
  10  -2  -3   53.33   34.12
  10   2   3   58.75   12.78
  10  -2   3   62.28   15.51
 -10  -2  -4   98.51    9.94
 -10   2  -4  107.13   17.86
 -10   2   4  110.07    9.18
  10   2  -4  111.24    8.44
  10  -2  -4  122.62    9.53
  10   2  -4  122.33    8.96
  10   2  -4  119.63   11.66
  10  -2  -4  110.83   10.69
  10   2   4   99.31   14.96
  10  -2   4  127.60   11.70
 -10  -2  -5    1.09    3.28
 -10   2  -5   -0.71    5.30
 -10   2   5    3.72    2.25
  10  -2  -5    3.92    2.27
  10   2  -5    4.49    4.09
  10  -2  -5    3.12    2.90
  10   2   5    3.71    5.49
  10  -2   5    8.58    5.77
 -10  -2  -6  166.90   23.91
 -10   2  -6  173.52   19.52
 -10   2   6  204.66   16.60
  10  -2  -6  202.87   16.36
  10  -2  -6  247.32   23.36
  10   2  -6  238.45   26.59
  10   2   6  207.77   19.52
  10  -2   6  261.97   23.34
 -10   2   7  417.11   33.20
 -10  -2  -7  374.79   48.89
 -10   2  -7  386.42   19.22
 -10   2   7  461.78    5.49
  10  -2  -7  512.10   12.01
  10   2  -7  539.63   13.78
  10   2   7  422.04   43.81
  10  -2   7  525.09   43.56
 -10   2   8  108.32    7.80
 -10  -2  -8   94.28   17.38
 -10   2  -8  114.62   12.73
 -10   2   8  134.24    9.51
  10  -2  -8  166.95   14.19
  10   2  -8  165.73   14.47
  10   2   8  132.50   15.27
  10  -2   8  165.51   15.44
 -10  -2  -9  114.17   69.97
 -10   2   9  109.48   10.76
 -10   2  -9  111.72   14.91
 -10   2   9  145.34   14.02
  10  -2  -9  170.08   18.58
  10   2  -9  164.55   18.42
  10   2   9  138.71   23.57
  10  -2   9  151.44   21.84
 -10  -2 -10  242.15   22.35
 -10   2 -10  257.64   23.25
 -10   2  10  241.99   18.90
 -10   2  10  330.28   25.69
  10  -2 -10  368.03   33.49
  10   2 -10  365.91   31.99
  10   2  10  316.59   28.37
  10  -2  10  367.88   32.32
 -10  -2 -11  448.03   26.93
 -10   2 -11  483.79   29.98
  10  -2 -11  705.97   41.90
  10   2 -11  724.23   43.39
  10   2  11  633.40   37.15
  10  -2  11  713.20   45.36
 -10  -2 -12  167.52   29.11
 -10   2 -12  168.00   22.22
  10  -2 -12  287.43   28.80
  10   2 -12  296.44   30.40
  10   2  12  260.07   29.02
  10  -2  12  296.22   32.20
 -10  -2 -13  160.12   27.99
 -10   2 -13  170.63   23.03
  10  -2 -13  243.71   28.16
  10   2 -13  251.21   30.84
  10   2  13  219.73   45.50
  10  -2  13  246.75   31.28
 -10  -2 -14  178.72   24.35
 -10   2 -14  215.89   28.29
  10  -2 -14  292.53   33.00
  10   2 -14  275.18   33.86
  10   2  14  282.38   34.51
  10  -2  14  310.18   37.96
 -10  -2 -15  418.25   29.86
 -10   2 -15  455.35   34.00
  10  -2 -15  642.70   41.89
  10   2 -15  648.58   42.52
  10   2  15  558.75   41.61
  10  -2  15  648.15   52.86
 -10  -2 -16  122.39   20.37
 -10   2 -16  130.04   31.44
  10  -2 -16  177.94   27.43
  10   2 -16  163.05   35.74
  10   2  16  166.05   26.06
  10  -2  16  159.99   24.79
 -10  -2 -17  141.33   19.81
 -10   2 -17  142.97   20.18
  10  -2 -17  227.49   28.51
  10   2 -17  212.11   28.01
  10   2  17  200.56   53.97
  10  -2  17  213.60   38.67
 -10  -2 -18   43.01   25.99
 -10   2 -18   44.21   31.91
  10  -2 -18   67.19    8.82
  10   2 -18   64.96   19.81
  10   2  18   71.23   19.73
  10  -2  18   58.58   18.70
 -10  -2 -19  312.93   27.79
 -10   2 -19  334.77   32.16
  10  -2 -19  460.94   39.16
  10   2 -19  515.24   40.29
  10   2  19  462.32   37.87
  10  -2  19  515.88   42.25
 -11  -2   0    0.80    1.94
 -11   2   0   -1.19    4.32
  11   2   0    0.36    1.30
  11   2   0    3.37    2.97
  11  -2   0    0.98    2.08
 -11  -2  -1  790.44   20.50
 -11   2  -1  733.01   23.20
 -11   2   1  749.30   18.77
  11   2  -1  772.40   16.95
  11  -2  -1  728.11   16.79
  11   2  -1  786.21   20.70
  11  -2  -1  841.08   20.82
  11   2   1  846.09   22.51
  11  -2   1  771.98   23.30
 -11  -2   2  109.98    4.51
 -11  -2  -2  109.27   14.80
 -11   2  -2  132.23   23.79
 -11   2   2  114.21   11.81
  11  -2  -2  106.58    5.07
  11   2  -2   96.09    5.96
  11  -2  -2  118.43   12.99
  11   2   2  131.06   13.85
  11  -2   2  103.31   12.61
 -11  -2  -3 1672.69   62.91
 -11   2  -3 1471.96   59.37
 -11   2   3 1508.12   55.86
  11   2  -3 1765.72   64.60
  11  -2  -3 1577.38   58.76
  11   2  -3 1517.46   60.46
  11  -2  -3 1363.40   51.94
  11   2   3 1662.68   64.32
  11  -2   3 1692.21   64.12
 -11  -2  -4  117.74   19.81
 -11   2  -4  117.19   12.70
 -11   2   4  109.94    9.85
  11   2  -4  127.64   11.23
  11  -2  -4  142.50   12.62
  11   2  -4  130.05   10.63
  11   2  -4  123.08   13.18
  11  -2  -4  111.37   11.95
  11   2   4  110.03   12.66
  11  -2   4  137.60   23.54
 -11  -2  -5 1037.52   44.28
 -11   2  -5 1044.80   44.55
 -11   2   5 1003.24   37.38
  11  -2  -5 1091.97   40.37
  11   2  -5 1172.59   46.29
  11  -2  -5 1116.80   48.53
  11   2   5  972.35   42.36
  11  -2   5 1293.19   50.72
 -11  -2  -6  111.80   19.45
 -11   2  -6  117.65   21.24
 -11   2   6   87.06    7.30
  11  -2  -6  114.82    8.84
  11  -2  -6  129.16   13.84
  11   2  -6  140.67   12.80
  11   2   6  116.24   14.07
  11  -2   6  140.93   16.25
 -11  -2  -7  902.22   39.28
 -11   2  -7  990.81   39.13
 -11   2   7  888.35   31.36
  11   2  -7 1152.41   50.75
  11  -2  -7 1225.66   49.57
  11   2   7 1007.47   47.12
  11  -2   7 1243.73   47.81
 -11  -2  -8   19.54   15.37
 -11   2   8   16.46    3.52
 -11   2  -8   14.08   12.67
 -11   2   8   14.75    1.96
  11  -2  -8   24.85   11.21
  11   2  -8   24.67   13.88
  11   2   8   22.80   17.27
  11  -2   8   20.15    8.61
 -11  -2  -9  575.63   33.72
 -11   2  -9  574.03   33.86
  11  -2  -9  764.35   44.03
  11   2  -9  754.18   42.05
  11   2   9  635.24   37.36
  11  -2   9  782.49   48.03
 -11  -2 -10    9.59   11.09
 -11   2 -10   13.19    8.24
  11  -2 -10   13.37    8.22
  11   2 -10   18.99   15.28
  11   2  10   14.43    9.01
  11  -2  10   17.23   11.97
 -11  -2 -11  825.01   53.07
 -11   2 -11  769.31   49.01
  11  -2 -11 1188.00   72.69
  11   2 -11 1130.74   68.49
  11   2  11 1038.85   67.69
  11  -2  11 1094.08   67.17
 -11  -2 -12   26.37   14.23
 -11   2 -12   32.07   20.15
  11  -2 -12   35.59   18.03
  11   2 -12   34.70   25.88
  11   2  12   30.93   19.89
  11  -2  12   43.32   26.34
 -11  -2 -13  180.60   24.87
 -11   2 -13  179.65   36.07
  11  -2 -13  268.77   32.97
  11   2 -13  275.57   34.92
  11   2  13  259.68   24.55
  11  -2  13  277.87   36.13
 -11  -2 -14   91.61   15.84
 -11   2 -14  108.97   19.54
  11  -2 -14  136.85    8.71
  11   2 -14  134.74   13.28
  11   2  14  133.50   30.80
  11  -2  14  136.84   22.03
 -11  -2 -15  153.78   28.92
 -11   2 -15  158.37   27.48
  11  -2 -15  224.41   29.99
  11   2 -15  225.46   35.55
  11   2  15  195.52   44.39
  11  -2  15  224.28   33.42
 -11  -2 -16   64.95   19.09
 -11   2 -16   64.18   16.48
  11  -2 -16   84.55    8.89
  11   2 -16   96.29   12.50
  11   2  16   76.23   22.20
  11  -2  16   94.27   31.35
 -11  -2 -17   68.96   13.95
 -11   2 -17   73.37   28.89
  11  -2 -17   98.92   11.39
  11   2 -17  106.67   13.78
  11   2  17   98.20   22.49
  11  -2  17   99.38   38.41
 -11  -2 -18  135.33   25.56
 -11   2 -18  154.12   26.66
  11  -2 -18  198.06   31.04
  11   2 -18  192.02   33.27
  11   2  18  195.54   32.56
  11  -2  18  205.03   34.62
 -11  -2 -19  106.73   38.69
 -11   2 -19  107.93   23.49
  11   2 -19  164.85   29.76
  11   2  19  125.75   35.14
  11  -2  19  154.44   31.63
 -12  -2   0  309.94   26.99
 -12   2   0  331.90   30.56
  12   2   0  355.23   30.34
  12  -2   0  348.97   30.57
 -12  -2   1   56.05    8.42
 -12  -2  -1   61.47   12.70
 -12   2  -1   53.54   17.58
 -12   2   1   50.92    8.31
  12   2  -1   54.61    5.83
  12   2  -1   56.61   13.74
  12  -2  -1   61.15    7.32
  12   2   1   63.28   16.35
  12  -2   1   57.47    6.55
 -12  -2   2  315.85   23.34
 -12  -2  -2  318.55   23.33
 -12   2  -2  341.44   11.08
 -12   2   2  332.22   12.03
  12   2  -2  356.66   24.92
  12  -2  -2  304.20   22.53
  12   2  -2  302.81   23.30
  12  -2  -2  356.03   26.24
  12   2   2  354.74   27.53
  12  -2   2  324.27   24.43
 -12  -2   3   18.04    6.12
 -12  -2  -3   16.66   10.02
 -12   2  -3   18.85   16.13
 -12   2   3   17.74    6.30
  12   2  -3   18.24    2.18
  12  -2  -3   12.22    8.63
  12   2  -3   19.81   11.62
  12  -2  -3   14.90   15.05
  12   2   3   16.71    9.56
  12  -2   3   16.28    8.85
 -12  -2  -4   66.82   11.79
 -12   2  -4   71.47   20.50
 -12   2   4   60.04    5.90
  12   2  -4   62.19    2.63
  12  -2  -4   54.88    3.75
  12   2  -4   65.59    2.71
  12   2  -4   60.80   11.43
  12  -2  -4   50.67    7.04
  12   2   4   59.63   26.27
  12  -2   4   60.80   17.17
 -12  -2  -5   91.18   13.19
 -12   2  -5   99.08   18.12
 -12   2   5   97.69    7.60
  12  -2  -5   94.90    7.64
  12  -2  -5   94.62    9.79
  12   2  -5  105.85   11.45
  12   2   5   97.41   16.80
  12  -2   5  108.70   11.34
 -12  -2  -6   52.14   11.51
 -12   2  -6   53.46   12.96
 -12   2   6   47.35    6.42
  12  -2  -6   44.25    3.27
  12  -2  -6   55.81    8.74
  12   2  -6   53.51   20.40
  12   2   6   52.39   35.62
  12  -2   6   60.94   15.31
 -12   2   7    5.30    2.03
 -12  -2  -7    2.87    7.17
 -12   2  -7    7.10    9.46
 -12   2   7    3.84    3.20
  12   2  -7    6.91    4.73
  12  -2  -7    8.84    5.57
  12   2   7    7.67    3.77
  12  -2   7    6.46    3.56
 -12  -2  -8    8.70    8.25
 -12   2  -8   10.09    9.05
  12   2  -8    2.57    4.59
  12  -2  -8   11.97    6.45
  12   2   8    9.31    6.47
  12  -2   8    8.57    8.75
 -12  -2  -9  190.82   20.88
 -12   2  -9  219.15   29.07
  12   2  -9  260.83   27.02
  12  -2  -9  274.55   27.52
  12   2   9  189.18   21.25
  12  -2   9  301.82   42.12
 -12  -2 -10   42.38   28.34
 -12   2 -10   45.10   30.56
  12  -2 -10   51.26    7.21
  12   2 -10   54.87   29.11
  12   2  10   49.16   22.76
  12  -2  10   55.26   12.32
 -12  -2 -11   73.58   18.63
 -12   2 -11  123.00   12.46
  12  -2 -11  120.74   14.32
  12   2 -11  118.24   15.68
  12   2  11  102.43   43.41
  12  -2  11  122.17   36.62
 -12  -2 -12   75.45   20.25
 -12   2 -12   76.80   19.78
  12  -2 -12   81.18    8.27
  12   2 -12   70.21   24.33
  12   2  12   61.43   19.52
  12  -2  12   81.48   26.79
 -12  -2 -13  220.11   28.68
 -12   2 -13  222.07   27.31
  12  -2 -13  286.91   33.64
  12   2 -13  290.10   34.53
  12   2  13  289.74   35.69
  12  -2  13  315.07   37.77
 -12  -2 -14  119.05   40.00
 -12   2 -14  122.01   33.82
  12  -2 -14  151.24   21.75
  12   2 -14  145.77   30.15
  12   2  14  132.02   39.35
  12  -2  14  154.04   24.13
 -12  -2 -15   90.09   25.43
 -12   2 -15   95.91   35.84
  12  -2 -15  114.47   11.57
  12   2 -15  113.63   15.42
  12   2  15  105.23   21.80
  12  -2  15  102.90   14.87
 -12  -2 -16   77.67   20.52
 -12   2 -16   76.86   25.78
  12  -2 -16  104.65   12.02
  12   2 -16  101.68   10.82
  12   2  16   92.43   19.07
  12  -2  16  108.76   22.52
 -12  -2 -17  203.03   33.45
 -12   2 -17  225.48   36.98
  12  -2 -17  277.82   42.36
  12   2 -17  303.68   48.85
  12   2  17  254.92   40.67
  12  -2  17  309.81   49.00
 -12  -2 -18   31.13   30.15
 -12   2 -18   43.39   26.23
  12   2 -18   48.16   12.04
  12   2  18   43.05   26.86
  12  -2  18   61.62   38.30
 -13  -2   0    1.28    2.38
 -13   2   0    0.59    6.83
  13   2   0   -0.83    4.09
  13  -2   0    2.21    5.53
 -13  -2   1  590.69   22.78
 -13  -2  -1  612.03   24.28
 -13   2   1  544.69   24.49
 -13   2  -1  580.74   26.96
  13   2  -1  603.44   22.79
  13   2  -1  604.70   25.61
  13  -2  -1  627.79   31.45
  13   2   1  646.74   29.74
  13  -2   1  604.47   30.82
 -13  -2   2   73.28    8.31
 -13  -2  -2   89.36   19.44
 -13   2  -2   68.69   12.04
 -13   2   2   70.51    9.48
  13   2  -2   80.50    9.26
  13   2  -2   80.13   11.55
  13  -2  -2   78.57   10.48
  13   2   2   77.34   11.98
  13  -2   2   70.07   19.94
 -13  -2   3  494.11   38.78
 -13  -2  -3  591.75   28.85
 -13   2  -3  547.14   25.92
 -13   2   3  515.56   22.90
  13   2  -3  596.08   24.10
  13  -2  -3  499.66   39.86
  13   2  -3  500.31   43.69
  13  -2  -3  510.14   26.31
  13   2   3  562.23   27.75
  13  -2   3  526.30   27.35
 -13  -2  -4   30.34   16.08
 -13   2  -4   26.52    6.74
 -13   2   4   25.14    7.83
  13   2  -4   23.88    5.50
  13  -2  -4   18.61   10.45
  13   2  -4   26.36    6.59
  13   2  -4   25.56   14.74
  13  -2  -4   25.18   18.55
  13   2   4   29.78   18.72
  13  -2   4   28.25   19.29
 -13  -2  -5  596.45   27.70
 -13   2  -5  587.68   30.74
 -13   2   5  522.39   21.39
  13  -2  -5  489.17   38.31
  13   2  -5  510.64   42.33
  13  -2  -5  518.33   42.28
  13   2   5  580.75   28.76
  13  -2   5  582.88   31.03
 -13  -2  -6   26.34   22.06
 -13   2  -6   30.50   26.34
 -13   2   6   25.80    4.87
  13  -2  -6   24.65    3.74
  13   2  -6   38.84   16.32
  13  -2  -6   29.27   20.79
  13   2   6   27.07   15.49
  13  -2   6   37.24   25.47
 -13  -2  -7  297.83   39.15
 -13   2  -7  302.42   31.90
  13   2  -7  307.85   32.87
  13  -2  -7  307.45   34.21
  13   2   7  276.19   29.56
  13  -2   7  345.53   36.78
 -13  -2  -8   43.72   27.50
 -13   2  -8   36.10   23.93
  13  -2  -8   40.04    6.22
  13   2  -8   44.06   26.42
  13   2   8   43.69   18.73
  13  -2   8   41.75   24.71
 -13  -2  -9  401.67   16.85
 -13   2  -9  402.55   46.76
  13  -2  -9  478.86   53.54
  13   2  -9  454.46   52.33
  13   2   9  389.63   45.44
  13  -2   9  469.64   55.47
 -13  -2 -10   39.06   33.86
 -13   2 -10   52.92   11.85
  13  -2 -10   56.17    8.71
  13   2 -10   58.40   10.16
  13   2  10   47.51   33.02
  13  -2  10   59.16   34.02
 -13  -2 -11  274.85   19.63
 -13   2 -11  228.99   21.98
  13  -2 -11  291.54   17.87
  13   2 -11  278.19   13.39
  13   2  11  238.33   38.23
  13  -2  11  297.10   38.05
 -13  -2 -12  138.26   19.49
 -13   2 -12  126.08   14.21
  13  -2 -12  158.27   20.46
  13   2 -12  163.18   14.51
  13   2  12  149.20   35.95
  13  -2  12  167.80   17.56
 -13  -2 -13  245.54   36.31
 -13   2 -13  273.82   36.32
  13  -2 -13  322.58   40.46
  13   2 -13  319.25   45.03
  13   2  13  289.97   38.43
  13  -2  13  363.91   47.15
 -13  -2 -14   71.57   16.46
 -13   2 -14   59.48   19.01
  13  -2 -14   83.11    8.50
  13   2 -14   70.20    9.57
  13   2  14   80.28   23.75
  13  -2  14   85.42   23.06
 -13  -2 -15   71.98   21.83
 -13   2 -15   80.28   14.29
  13  -2 -15   90.93    7.44
  13   2 -15   80.95   16.25
  13   2  15   78.01   45.50
  13  -2  15   99.52   14.11
 -13  -2 -16   15.15    9.45
 -13   2 -16   20.82   15.59
  13  -2 -16   15.28   12.15
  13   2 -16   19.83   12.03
  13   2  16   13.81    8.92
  13  -2  16   18.31   23.51
 -13  -2 -17   63.83   15.27
 -13   2 -17   46.57   36.22
  13   2 -17   60.93   21.54
  13   2  17   68.52   44.23
  13  -2  17   69.77   46.21
 -14  -2   0  120.46   13.14
 -14   2   0  111.89   13.11
  14   2   0  118.46   15.97
  14  -2   0  136.30   15.84
 -14  -2   1   17.91    6.19
 -14  -2  -1   19.04   11.85
 -14   2  -1   18.40   16.60
 -14   2   1   20.01   14.33
  14   2  -1   23.15   13.17
  14  -2  -1   19.88   12.47
  14   2   1   17.69   14.48
  14  -2   1   16.44   14.90
 -14  -2   2  175.02   19.08
 -14  -2  -2  182.68   20.11
 -14   2   2  190.19   19.47
 -14   2  -2  163.73   17.96
  14   2  -2  191.29   18.79
  14   2  -2  182.44   38.84
  14  -2  -2  192.73   22.03
  14   2   2  195.48   22.58
  14  -2   2  172.54   19.00
 -14  -2   3   22.97    7.78
 -14  -2  -3   24.09   13.78
 -14   2   3   23.57    6.93
 -14   2  -3   20.47   15.48
  14   2  -3   23.94    7.52
  14   2  -3   32.05   17.00
  14  -2  -3   30.39   24.26
  14   2   3   30.55   16.39
  14  -2   3   18.43   12.10
 -14  -2  -4  170.78   20.67
 -14   2   4  161.66   16.35
 -14   2  -4  158.73   20.24
  14   2  -4  144.39   14.09
  14   2  -4  154.43   19.22
  14  -2  -4  141.37   17.11
  14   2   4  164.19   19.95
  14  -2   4  146.01   18.22
 -14  -2  -5   13.33   13.05
 -14   2  -5    9.50   14.98
 -14   2   5    8.18    6.79
  14   2  -5    6.46    4.86
  14  -2  -5    8.42    7.93
  14   2   5    8.30    6.19
  14  -2   5    9.11    7.06
 -14  -2  -6   93.65   15.38
 -14   2  -6   81.36   11.43
  14  -2  -6   73.68    9.10
  14   2  -6   85.38   46.98
  14   2   6   84.72   16.13
  14  -2   6   82.86   16.22
 -14  -2  -7   77.82   17.11
 -14   2  -7  102.94   20.19
  14  -2  -7   84.83   11.34
  14   2  -7   83.79   13.11
  14   2   7   86.79   25.27
  14  -2   7   91.00   14.25
 -14  -2  -8   55.54   26.63
 -14   2  -8   60.97   17.85
  14  -2  -8   64.48    9.11
  14   2  -8   65.82   13.98
  14   2   8   62.47   28.11
  14  -2   8   65.16   14.02
 -14  -2  -9   61.35   14.26
 -14   2  -9   67.47   14.66
  14  -2  -9   51.07    6.91
  14   2  -9   51.77   24.18
  14   2   9   47.08   24.18
  14  -2   9   53.84   20.32
 -14  -2 -10   57.42   10.65
 -14   2 -10   65.70   12.61
  14  -2 -10   68.00   11.22
  14   2 -10   65.66   10.49
  14   2  10   56.04   30.38
  14  -2  10   79.51   23.63
 -14  -2 -11  110.18   31.01
 -14   2 -11  107.84   28.15
  14  -2 -11  121.71    8.89
  14   2 -11  118.78   10.36
  14   2  11   99.67   45.49
  14  -2  11  120.64   18.20
 -14  -2 -12   75.29   10.35
 -14   2 -12   86.38   41.67
  14  -2 -12   93.21    8.21
  14   2 -12   76.68   19.90
  14   2  12   74.10   18.88
  14  -2  12   85.74   29.23
 -14  -2 -13   23.79   31.47
 -14   2 -13   32.38   23.31
  14  -2 -13   29.21   16.59
  14   2 -13   34.85   28.76
  14   2  13   28.85   15.17
  14  -2  13   31.99   25.68
 -14  -2 -14   55.53   36.73
 -14   2 -14   71.73   23.47
  14  -2 -14   63.65   21.96
  14   2 -14   70.70   29.97
  14   2  14   61.19   18.15
  14  -2  14   58.69   26.26
 -14  -2 -15   89.86   23.28
 -14   2 -15  107.96   33.24
  14  -2 -15  125.45    9.57
  14   2 -15  114.38   11.14
  14   2  15   99.09   53.85
  14  -2  15  128.15   25.05
 -14  -2 -16   20.88   18.41
 -14   2 -16   24.75   18.74
  14   2 -16   24.25   22.05
  14   2  16   25.24   25.60
  14  -2  16   30.68   26.66
 -14  -2 -17  123.78   35.37
 -14   2 -17  138.63   26.81
  14   2 -17  142.64   25.95
  14   2  17  114.61   45.30
  14  -2  17  158.48   29.64
 -15  -2   0    4.04    3.22
 -15   2   0   -0.36    4.69
  15   2   0   -0.33    8.82
  15  -2   0   -3.49    6.00
 -15  -2   1  475.71   12.09
 -15  -2  -1  505.84   33.42
 -15   2   1  443.87   27.86
 -15   2  -1  455.10   29.06
  15   2  -1  457.86   31.70
  15   2   1  500.07   33.55
  15  -2  -1  473.47   36.74
  15  -2   1  488.91   32.52
 -15  -2   2  108.27   10.34
 -15  -2  -2  109.81   16.46
 -15   2   2   95.20    8.82
 -15   2  -2  113.59   18.97
  15   2  -2   92.34   11.39
  15  -2  -2  112.01   10.68
  15   2   2  107.99   13.37
  15  -2   2  114.71   11.60
 -15  -2  -3  199.23   23.76
 -15   2   3  198.24   21.00
 -15   2  -3  204.49   21.38
  15   2  -3  200.08   21.87
  15  -2  -3  191.76   28.67
  15   2   3  204.86   23.11
  15  -2   3  174.79   26.12
 -15  -2  -4   38.45    8.90
 -15   2   4   28.20   10.82
 -15   2  -4   33.15   21.28
  15   2  -4   32.57    4.98
  15   2  -4   31.64   17.53
  15  -2  -4   31.57   19.87
  15   2   4   31.75   24.48
  15  -2   4   28.99   18.40
 -15  -2  -5  140.50   20.29
 -15   2  -5  138.70   23.75
  15   2  -5  118.82   24.03
  15  -2  -5  108.32   20.57
  15   2   5  146.37   19.99
  15  -2   5  121.28   11.01
 -15  -2  -6   58.10   16.05
 -15   2  -6   64.79   16.87
  15  -2  -6   61.92    9.01
  15   2  -6   47.21    9.51
  15   2   6   59.52   20.72
  15  -2   6   60.12   13.93
 -15  -2  -7  339.97   23.60
 -15   2  -7  332.18   45.36
  15  -2  -7  302.21   18.74
  15   2  -7  292.77   20.18
  15   2   7  301.18   21.32
  15  -2   7  323.73   25.03
 -15  -2  -8    3.10    5.92
 -15   2  -8   11.20    9.21
  15  -2  -8    8.51    8.49
  15   2  -8   10.45    5.82
  15   2   8    9.90   10.82
  15  -2   8   10.94    7.48
 -15  -2  -9  205.97   36.28
 -15   2  -9  220.85   37.39
  15  -2  -9  204.75   25.47
  15   2  -9  201.58   27.21
  15   2   9  166.97   40.82
  15  -2   9  222.38   27.98
 -15  -2 -10   32.10   14.46
 -15   2 -10   25.94   15.58
  15  -2 -10   24.30   20.49
  15   2 -10   22.75    9.71
  15   2  10   20.06   14.44
  15  -2  10   27.79   22.25
 -15  -2 -11  130.21   35.59
 -15   2 -11  133.71   26.13
  15  -2 -11  137.89   19.26
  15   2 -11  129.78   19.35
  15   2  11  109.96   19.42
  15  -2  11  135.12   20.91
 -15  -2 -12   33.99   31.01
 -15   2 -12   33.51   24.25
  15  -2 -12   35.49   16.87
  15   2 -12   44.93   28.83
  15   2  12   30.32   21.06
  15  -2  12   42.72   25.71
 -15  -2 -13   53.18   31.79
 -15   2 -13   68.46   38.55
  15  -2 -13   70.32    7.80
  15   2 -13   72.96    9.92
  15   2  13   61.60   39.35
  15  -2  13   86.30   18.26
 -15  -2 -14   20.17   14.92
 -15   2 -14   13.48   10.37
  15  -2 -14   15.46   16.23
  15   2 -14   19.01   16.52
  15   2  14   22.07   13.71
  15  -2  14   15.34   11.47
 -15  -2 -15   91.44   26.70
 -15   2 -15   75.38    9.65
  15   2 -15   88.33   10.44
  15   2  15   72.89   25.17
  15  -2  15  116.80   33.47
 -15  -2 -16    7.98    8.67
 -15   2 -16   -0.60    8.48
  15   2 -16    1.70    2.94
  15   2  16    5.05    5.41
  15  -2  16    1.90    6.46
 -16  -2   0   31.68    9.32
 -16   2   0   24.30   13.12
  16   2   0   27.43   21.51
  16  -2   0   27.33   20.46
 -16  -2   1    1.37    2.97
 -16  -2  -1    3.51    3.80
 -16   2   1    0.11    2.77
 -16   2  -1    0.28    2.53
  16   2  -1    3.60    6.56
  16  -2  -1   -0.68    6.57
  16  -2   1    1.52    4.44
 -16  -2   2   13.31    9.31
 -16  -2  -2   17.72   13.01
 -16   2   2   19.03   10.78
 -16   2  -2   19.68   11.28
  16   2  -2   15.24   10.01
  16  -2  -2   24.73   15.72
  16   2   2   21.11   19.06
  16  -2   2   18.13   11.65
 -16  -2  -3   23.91   10.36
 -16   2  -3   15.50   14.61
 -16   2   3   21.54    9.14
  16   2  -3   17.88   12.37
  16  -2  -3   21.22   16.48
  16   2   3   20.20   10.24
  16  -2   3   21.99    8.02
 -16  -2  -4   24.77   14.41
 -16   2  -4   25.34   19.78
  16   2  -4   26.77   18.76
  16  -2  -4   21.88   18.34
  16   2   4   27.71   14.05
  16  -2   4   23.27   18.17
 -16  -2  -5   42.41   10.17
 -16   2  -5   49.34   10.36
  16   2  -5   35.56   30.98
  16  -2  -5   42.75    7.05
  16   2   5   44.61   20.27
  16  -2   5   38.00   25.58
 -16  -2  -6   89.56   17.46
 -16   2  -6   89.61   18.86
  16   2  -6   65.11   24.53
  16  -2  -6   65.27    7.55
  16   2   6   76.03   10.59
  16  -2   6   82.47   29.66
 -16  -2  -7   27.06   14.22
 -16   2  -7   29.25   22.38
  16  -2  -7   24.61   23.66
  16   2  -7   20.46   20.11
  16   2   7   27.76   26.59
  16  -2   7   24.58   20.78
 -16  -2  -8   36.80   21.33
 -16   2  -8   37.12   28.61
  16   2  -8   31.99   20.88
  16  -2  -8   39.34   14.11
  16   2   8   43.17   28.69
  16  -2   8   33.89   27.80
 -16  -2  -9   52.08   11.36
 -16   2  -9   47.68   25.43
  16   2  -9   42.94   29.75
  16  -2  -9   42.36   26.53
  16   2   9   43.17   13.49
  16  -2   9   44.29   29.19
 -16  -2 -10   27.47   24.47
 -16   2 -10   22.69   12.70
  16  -2 -10   21.90   19.18
  16   2 -10   26.10   14.58
  16   2  10   20.07   13.51
  16  -2  10   26.96   16.49
 -16  -2 -11   10.75   10.68
 -16   2 -11   32.31   10.74
  16  -2 -11    6.75    4.50
  16   2 -11    7.02    8.54
  16   2  11   10.23    9.38
  16  -2  11    7.20    4.05
 -16  -2 -12    4.60    6.60
 -16   2 -12   10.12    7.79
  16  -2 -12    5.89    7.53
  16   2 -12    5.51    4.83
  16   2  12    9.17   10.50
  16  -2  12    8.98    6.86
 -16  -2 -13   48.28   13.65
 -16   2 -13   47.12   12.17
  16   2 -13   38.66   26.31
  16   2  13   35.53   27.66
  16  -2  13   42.36   34.84
 -16  -2 -14    4.45    7.62
 -16   2 -14    2.15    9.34
  16   2 -14    6.39    6.53
  16   2  14    3.75    5.73
  16  -2  14   -1.52    9.32
 -16  -2 -15   40.73   37.28
 -16   2 -15   48.87   35.97
  16   2 -15   37.19   29.46
  16   2  15   39.23   24.40
  16  -2  15   50.11   40.05
 -17  -2   0    3.05    3.60
 -17   2   0   -0.25    2.04
  17   2   0    2.50    5.21
  17  -2   0    1.88    5.25
 -17  -2  -1  310.89   35.50
 -17   2   1  312.11   35.70
 -17   2  -1  316.81   35.76
  17   2  -1  327.82   38.49
  17  -2  -1  331.59   43.35
  17   2   1  370.41   44.34
  17  -2   1  347.95   40.47
 -17  -2  -2   -1.19    4.33
 -17   2   2   -1.55    2.92
 -17   2  -2    1.49    5.55
  17   2  -2   -0.70    6.62
  17  -2  -2    1.01    3.88
  17   2   2    4.55    5.48
  17  -2   2    3.05    4.18
 -17  -2  -3   85.45   18.58
 -17   2  -3   85.44   17.68
  17  -2  -3   86.88   10.11
  17   2  -3   94.89   18.53
  17   2   3   83.80   13.67
  17  -2   3   82.52   10.53
 -17  -2  -4   20.79   17.59
 -17   2  -4   19.35   15.44
  17   2  -4   23.71   19.50
  17  -2  -4   31.13   19.55
  17   2   4   26.16   21.21
  17  -2   4   26.91   22.56
 -17  -2  -5   55.13   16.49
 -17   2  -5   42.87   14.79
  17  -2  -5   31.28   15.36
  17   2  -5   42.91   29.43
  17   2   5   39.77   31.73
  17  -2   5   41.93   32.89
 -17  -2  -6    2.31    3.33
 -17   2  -6    1.14    5.40
  17   2  -6    2.74    3.99
  17  -2  -6   -1.04    5.05
  17   2   6   -1.88    7.51
  17  -2   6    3.77    4.13
 -17  -2  -7   52.83   12.08
 -17   2  -7   43.39   16.71
  17   2  -7   32.66   13.04
  17  -2  -7   35.55   19.19
  17   2   7   42.41   26.89
  17  -2   7   42.73   27.50
 -17  -2  -8    2.08    3.70
 -17   2  -8    2.36    3.20
  17   2  -8    2.52    4.04
  17  -2  -8    4.40    2.36
  17   2   8    3.90   11.17
  17  -2   8    8.72    9.02
 -17  -2  -9  108.35   12.84
 -17   2  -9  107.94   21.17
  17  -2  -9   87.32   13.01
  17   2  -9   93.36   12.38
  17   2   9   73.23   45.96
  17  -2   9   97.58   30.10
 -17  -2 -10   79.71   19.19
 -17   2 -10   62.55   43.43
  17  -2 -10   63.30    6.81
  17   2 -10   55.76    7.46
  17   2  10   50.65   38.48
  17  -2  10   71.77   16.13
 -17  -2 -11   49.02   13.42
 -17   2 -11   39.92   28.17
  17  -2 -11   48.37    7.78
  17   2 -11   44.46   21.51
  17   2  11   43.72   26.95
  17  -2  11   34.17   32.25
 -17  -2 -12   61.53   12.67
 -17   2 -12   61.28   16.88
  17   2 -12   48.94   23.81
  17   2  12   40.94   29.07
  17  -2  12   55.83   11.58
 -17  -2 -13   59.70   18.63
 -17   2 -13   52.24   39.08
  17   2 -13   57.25   26.33
  17   2  13   50.48   30.45
  17  -2  13   57.77    9.62
 -17  -2 -14   10.87   14.74
 -17   2 -14   12.23   10.34
  17   2  14    7.31   11.56
  17  -2  14   13.95    9.82
 -18   2   0    1.63    3.92
  18   2   0    0.83    5.18
  18  -2   0    3.76    5.55
 -18  -2  -1   14.53   11.64
 -18   2  -1   16.14   16.96
  18   2  -1   15.11    9.06
  18   2   1    9.04    7.39
  18  -2  -1   16.12    9.59
  18  -2   1   13.62   11.61
 -18  -2  -2    2.38    2.16
 -18   2  -2    2.80    4.00
  18   2  -2    0.86    3.91
  18  -2  -2   -0.14    6.25
  18   2   2    5.03    5.35
  18  -2   2    4.87    4.27
 -18  -2  -3    6.96    5.01
 -18   2  -3    7.53    6.16
  18   2  -3    4.30    4.34
  18  -2  -3    4.12    4.07
  18  -2   3    8.73   10.81
 -18  -2  -4   20.61   20.02
 -18   2  -4   20.16   18.94
  18   2  -4   20.78   18.15
  18  -2  -4   20.86   18.76
  18   2   4   21.49   16.08
  18  -2   4   17.93   11.07
 -18  -2  -5   37.41   18.11
 -18   2  -5   30.15   21.81
  18   2  -5   34.24   20.55
  18  -2  -5   32.60   26.93
  18   2   5   36.16   24.89
  18  -2   5   27.68   28.36
 -18  -2  -6   67.98   26.88
 -18   2  -6   68.68   13.88
  18  -2  -6   57.43    8.21
  18   2  -6   48.82    7.40
  18   2   6   67.26   25.21
  18  -2   6   61.10   24.51
 -18  -2  -7   38.75   11.20
 -18   2  -7   38.33   19.00
  18  -2  -7   21.87   20.52
  18   2  -7   22.88   20.22
  18   2   7   41.37   31.01
  18  -2   7   23.75   20.68
 -18  -2  -8   26.78   15.56
 -18   2  -8   28.84   24.04
  18   2  -8   23.06   21.22
  18  -2  -8   20.61   18.52
  18   2   8   30.28   31.70
  18  -2   8   25.16   18.15
 -18  -2  -9    2.51    5.20
 -18   2  -9   -0.83    7.41
  18   2  -9    2.32    6.31
  18  -2  -9    3.31    4.16
  18   2   9   -0.45    8.21
  18  -2   9    1.65    5.08
 -18  -2 -10    7.65    5.25
 -18   2 -10    7.10    8.76
  18  -2 -10    7.82    6.20
  18   2 -10   11.24   11.28
  18   2  10    5.24    8.17
  18  -2  10   14.98   12.89
 -18  -2 -11   -1.96    6.93
 -18   2 -11    5.06    9.45
  18   2 -11    3.16    5.45
  18   2  11    7.22    7.84
 -18   2 -12    3.39    4.46
  18   2 -12   -1.50    6.40
  18   2  12   -0.26    9.98
  18  -2  12    2.62    6.47
  19   2   0    3.95    6.09
  19  -2   0   -0.06    6.67
 -19   2  -1   44.32   16.46
  19  -2  -1   72.81   10.70
  19   2  -1   58.27   11.54
  19   2   1   48.93   18.46
  19  -2   1   51.70   11.65
 -19  -2  -2    1.17    4.32
 -19   2  -2    0.97    2.82
  19   2  -2    3.80    5.86
  19  -2  -2    1.54    4.40
  19  -2   2    1.59    5.46
 -19  -2  -3   28.30   13.10
 -19   2  -3   29.80   18.57
  19   2  -3   32.18   27.15
  19  -2  -3   26.75   19.33
  19   2   3   35.19   23.31
  19  -2   3   28.66   22.48
 -19  -2  -4   17.46   10.46
 -19   2  -4   14.81   11.52
  19  -2  -4   17.34   12.99
  19   2  -4   17.85   10.72
  19   2   4   17.58   15.93
  19  -2   4   16.99   15.22
 -19  -2  -5   17.63   13.14
 -19   2  -5   15.69    8.71
  19  -2  -5   14.72    8.42
  19   2  -5   12.67   10.85
  19   2   5   13.60    9.95
 -19  -2  -6   11.46   10.31
 -19   2  -6    7.11    6.59
  19   2  -6    8.62    9.63
  19  -2  -6    7.06    8.05
  19   2   6   10.70   10.42
  19  -2   6    6.70    4.47
 -19  -2  -7    1.98    3.78
 -19   2  -7    6.14    7.09
  19  -2  -7    3.93    5.06
  19   2  -7    5.30    8.19
  19   2   7    5.29    6.30
  19  -2   7    4.00    5.46
 -19  -2  -8    0.58    4.09
 -19   2  -8   -2.00    7.75
  19   2  -8   -1.85    6.39
  19  -2  -8    1.25    3.37
  19   2   8    1.07    4.59
  19  -2   8    2.62    4.88
 -19  -2  -9   10.81    8.93
 -19   2  -9   10.27    9.03
  19   2  -9    3.02    4.85
  19  -2  -9    6.02    7.38
  19   2   9    5.90    6.25
  19  -2   9    5.42    3.13
 -19  -2 -10    8.20    9.76
 -19   2 -10    6.19    8.88
  19   2 -10    3.78   10.48
  19   2  10   10.58    7.05
  19  -2  10    5.37    5.52
  20   2   0    4.86    6.52
  20  -2   0    3.49    7.75
  20  -2  -1    1.28    4.66
  20  -2   1    1.48    4.18
  20   2   1   -1.20    8.05
  20   2  -2    1.91    8.29
  20  -2  -2   -0.78    6.45
  20   2   2    3.03    4.24
  20  -2   2    2.23    4.88
 -20   2  -3    6.78    5.63
  20   2  -3    8.19    7.54
  20  -2  -3    2.80    2.92
  20   2   3    8.32    6.13
  20  -2   3    8.09    9.71
 -20  -2  -4    5.13    3.82
 -20   2  -4   -0.67    3.76
  20   2  -4    1.67    5.22
  20  -2  -4    2.19    5.64
  20   2   4    0.06    5.97
  20  -2   4    2.99    8.33
 -20  -2  -5    7.32    8.88
 -20   2  -5   11.47    9.55
  20  -2  -5    6.87    7.10
  20   2  -5   10.30   12.88
  20   2   5    9.62    9.07
  20  -2   5    4.26    9.55
 -20  -2  -6    6.15    6.10
 -20   2  -6    4.11    5.59
  20  -2  -6    3.88    5.00
  20   2  -6    3.10    4.62
  20  -2   6    2.88    5.26
 -20  -2  -7    3.43    8.45
 -20   2  -7    4.45    6.05
  20  -2  -7    1.62    3.30
  20   2  -7    4.59    4.57
  20   2   7    5.82    7.87
  20  -2   7    0.39    7.58
 -20  -2  -8    1.46    3.25
 -20   2  -8    2.92    3.57
  20   2  -8    3.17    4.94
  20   2   8    2.47    6.26
  20  -2   8   -2.45    8.30
  21   2   0   -0.43    4.57
  21  -2   0    0.88    6.96
  21   2  -1    2.05    6.30
  21  -2  -1    0.76    3.71
  21   2   1   -1.74    8.16
  21  -2   1    3.10    5.30
  21  -2  -2    3.99    7.60
  21   2  -2    1.77    9.67
  21   2   2    3.85    3.95
  21  -2   2    3.37    5.98
  21  -2  -3    2.12    5.37
  21   2  -3    1.60    4.82
  21   2   3    1.73    7.64
  21  -2   3    4.68    4.87
  21   2  -4    6.50    4.51
  21  -2  -4    8.40    5.97
  21   2   4    9.28    8.32
  21  -2   4   11.36    7.24
  21   2  -5   -1.62    8.52
  21  -2  -5   -0.34    5.80
  21   2   5   -1.13    8.86
  21  -2   5    2.38    9.33
 -21  -2  -6    7.02    6.46
 -21   2  -6    9.30    7.04
  21  -2  -6    2.69    4.53
  21   2  -6    6.82    6.52
  21   2   6    6.75    6.81
  21  -2   6    8.46    6.89
   0   3   0   11.97    7.38
   0  -3   0    9.42    5.50
   0   3   0    8.23    3.76
   0  -3   0    7.20    3.81
   0   3  -1    8.82    4.46
   0  -3   1    4.48    4.39
   0   3   1    7.50    4.34
   0  -3  -1    5.87    3.13
   0   3  -1    9.59    8.90
   0  -3   1    5.45    5.87
   0   3   1    8.63    4.34
   0  -3  -1    5.68    2.16
   0   3  -2    4.15    3.99
   0  -3   2    8.58    5.42
   0   3   2    9.42    5.64
   0  -3  -2    6.73    4.33
   0   3  -2    9.61    4.19
   0  -3   2    3.35    5.73
   0   3   2    9.28    5.96
   0  -3  -2    7.34    4.82
   0   3  -3   -0.30    4.31
   0  -3   3    1.61    2.64
   0   3   3    2.95    2.44
   0   3  -3    2.72    2.77
   0  -3   3    0.46    3.10
   0   3   3    0.76    1.24
   0  -3  -3   -0.13    2.02
   0   3   4    2.99    2.31
   0   3  -4    4.90    3.54
   0  -3   4    1.50    3.75
   0   3   4    6.24    6.55
   0   3  -4    1.22    4.12
   0  -3   4    1.73    2.57
   0   3   4    3.55    2.40
   0  -3  -4    2.48    2.02
   0   3   5    1.42    3.54
   0   3  -5    1.67    4.22
   0  -3   5    0.74    2.91
   0   3   5    2.75    2.37
   0   3  -5    1.97    3.11
   0  -3   5   -0.14    3.63
   0   3   5    1.78    1.32
   0  -3  -5    0.88    3.22
   0  -3  -6    2.86    4.41
   0   3   6    1.83    2.87
   0   3  -6    1.74    3.25
   0  -3   6    2.06    1.46
   0   3   6    0.99    1.51
   0   3  -6   -0.08    3.77
   0  -3   6    1.27    2.63
   0   3   6    2.05    2.28
   0  -3  -7    2.53    6.18
   0   3   7    1.48    4.00
   0   3  -7    0.24    3.94
   0  -3   7    1.30    1.52
   0   3   7    1.35    1.77
   0   3  -7    1.11    4.36
   0   3   7   -0.09    3.41
   0  -3  -8    7.48    7.06
   0   3   8    0.88    2.83
   0   3  -8    0.45    3.88
   0  -3   8    5.14    3.87
   0   3   8    2.74    2.06
   0   3  -8    1.10    4.13
   0   3   8    0.11    2.70
   0  -3  -9    1.23    3.38
   0   3  -9    0.42    2.19
   0   3  -9   -1.53    6.86
   0   3   9   -0.01    1.68
   0   3   9   -0.55    4.34
   0  -3 -10    1.93    4.94
   0   3 -10   -0.58    2.88
   0   3 -10    1.44    3.99
   0   3  10    2.39    3.41
   0  -3 -11   -1.21    4.52
   0   3 -11    2.75    4.93
   0   3 -11   -0.02    5.45
   0   3  11   -1.86    4.63
   0  -3 -12    1.44    2.38
   0   3 -12   -2.13    4.31
   0   3 -12    1.83    6.50
   0   3  12    2.52    3.64
   0  -3 -13    2.00    4.13
   0   3 -13    1.84    4.57
   0   3 -13   -1.63    8.69
   0   3  13    2.96    4.78
   0  -3 -14    3.93    5.44
   0   3 -14   -0.18    4.93
   0   3 -14    2.25    6.02
   0   3  14    4.69    5.35
   0  -3 -15    1.37    4.43
   0   3 -15   -1.39    5.35
   0   3 -15   -0.59    8.52
   0   3  15   -0.77    5.80
   0  -3 -16    0.21    4.03
   0   3 -16   -0.05    5.72
   0   3 -16    3.76    3.13
   0   3  16    1.90    3.70
   0  -3 -17   -0.33    6.53
   0   3 -17    3.54    6.47
   0   3  17    4.26    4.46
   0  -3 -18    2.29    4.52
   0   3 -18    0.52    4.15
   0   3  18   -0.86    6.16
   0  -3  18   -5.01    8.26
   0  -3 -19    3.52    7.67
   0   3 -19    0.18    3.98
   0   3  19    0.41    5.19
   0  -3  19   -1.86    9.39
   0  -3 -20    1.67    4.69
   0   3 -20    1.34    5.77
   0   3  20   -1.08    7.19
   0  -3  20   -1.49    9.46
   0  -3 -21    2.44    5.81
   0   3 -21    1.51    4.57
   0   3  21   -3.93    7.08
   0  -3  21    1.87    3.56
   0  -3 -22   -1.58    5.64
   0   3  22    0.88    8.78
   0  -3  22   -0.22    8.70
  -1   3   0    7.63    5.48
   1  -3   0    3.47    4.51
   1   3   0    5.49    7.09
  -1  -3   0    5.33    5.18
  -1   3   0    4.57    3.04
   1  -3   0    4.86    3.21
   1   3   0    7.59    3.40
  -1  -3   0    1.78    3.47
  -1   3  -1   69.02    9.32
   1  -3   1   83.89    5.05
   1   3  -1   83.23   11.64
  -1  -3   1   79.37   10.97
  -1   3   1   85.38   10.48
   1  -3  -1   74.77   10.41
   1   3   1   94.45    8.02
  -1  -3  -1   82.91    4.87
  -1   3  -1   89.76   11.21
   1  -3   1   87.85    9.83
  -1   3   1   81.41    8.52
   1   3  -1   84.33   11.07
  -1  -3   1   90.13    9.47
   1  -3  -1   73.80    4.43
   1   3   1   65.40   10.49
  -1  -3  -1   49.24    6.64
  -1   3  -2  299.39    8.07
   1  -3   2  278.30   10.56
   1   3  -2  294.37    8.34
  -1  -3   2  280.42    7.74
  -1   3   2  313.27    8.78
   1  -3  -2  303.29    7.99
   1   3   2  286.01    8.24
  -1  -3  -2  301.07    8.06
  -1   3  -2  342.29    8.65
   1  -3   2  328.67    9.14
   1   3  -2  331.74    9.23
  -1  -3   2  325.82    8.50
  -1   3   2  199.31    4.40
   1   3   2  138.88    5.18
  -1  -3  -2  178.56    5.21
   1  -3  -2  287.55    5.70
   1   3   3   13.02    8.42
  -1   3  -3   15.52   11.11
   1  -3   3   13.06    8.70
   1   3  -3   15.34   10.89
  -1  -3   3   17.23   12.02
  -1   3   3   18.50   10.17
   1  -3  -3   15.28    9.95
   1   3   3   18.07   11.12
  -1   3  -3   20.30   14.28
   1  -3   3   13.79    8.63
   1   3  -3   20.67   12.65
  -1  -3   3   17.95    9.28
   1   3   3   11.99    5.94
  -1   3   3   13.74    5.43
  -1  -3  -3   16.21    6.86
   1  -3  -3   17.71    5.88
  -1  -3  -4    2.17    3.63
  -1   3   4    2.03    2.89
   1   3   4    2.05    2.98
  -1   3  -4    2.41    3.58
   1   3  -4    3.00    2.74
   1  -3   4    2.55    4.09
  -1  -3   4    0.00    3.25
  -1   3   4    5.23    2.87
  -1   3   4    3.09    2.29
  -1   3  -4    4.62    3.25
   1  -3   4    1.77    2.03
   1   3  -4    2.52    3.35
  -1  -3   4    1.33    2.54
   1   3   4    2.66    1.83
  -1  -3  -4    1.86    2.17
  -1   3   4    2.83    1.81
  -1  -3  -5    4.93    4.93
  -1   3   5    2.87    2.44
   1   3   5    2.17    2.48
  -1   3  -5    1.42    4.10
   1   3  -5    0.98    1.70
   1  -3   5    1.41    2.22
  -1  -3   5    3.59    2.20
  -1   3   5    4.32    3.78
  -1   3   5    2.68    2.41
  -1   3  -5    5.36    2.78
   1  -3   5    0.52    2.09
   1   3  -5    7.16    4.15
  -1  -3   5    1.26    2.90
   1   3   5    3.65    3.13
  -1   3   5    3.48    1.84
  -1  -3  -5    1.25    2.66
  -1  -3  -6    2.96    3.50
  -1   3   6   -1.47    3.40
   1   3   6    1.66    3.36
  -1   3  -6   -1.03    4.76
   1   3  -6    1.12    1.82
   1  -3   6    0.28    1.93
  -1  -3   6    0.65    1.90
  -1   3   6    1.16    2.65
  -1   3  -6    1.95    3.25
  -1   3   6    0.55    1.97
   1   3  -6   -2.63    5.53
   1  -3   6    1.71    4.31
  -1  -3   6    1.23    3.07
   1   3   6    2.67    2.77
  -1   3   6    2.76    3.03
  -1  -3  -6    1.50    2.27
   1  -3  -7    1.54    3.79
  -1  -3  -7    2.71    2.96
  -1   3   7    1.14    2.06
   1   3  -7    2.43    3.86
  -1   3  -7    1.24    2.25
   1  -3   7    1.78    2.76
  -1  -3   7    1.46    1.11
   1   3   7   -0.71    2.35
  -1   3  -7    0.44    5.04
  -1   3   7    1.43    3.26
   1   3  -7    3.98    5.65
   1   3   7    4.02    3.25
  -1   3   7    1.92    3.36
   1  -3  -8    7.05    6.83
  -1  -3  -8   10.18    5.26
  -1   3   8    4.72    3.83
  -1   3  -8    1.35    2.77
   1   3  -8    2.88    4.26
  -1  -3   8   10.75    5.44
   1   3   8    5.72    3.31
  -1   3  -8    8.64    7.63
   1   3  -8    5.53    3.73
  -1   3   8    5.34    3.51
   1   3   8    5.57    2.47
  -1   3   8    7.21    5.25
   1  -3  -9    5.87    4.36
  -1  -3  -9    2.50    3.93
   1   3  -9    1.50    2.38
  -1   3  -9    2.44    2.73
  -1  -3   9    1.59    2.52
  -1   3  -9    3.92    3.50
   1   3  -9    1.80    5.18
  -1   3   9    2.47    1.40
   1   3   9    3.28    5.25
  -1   3   9    3.95    2.91
   1  -3 -10   35.94    6.97
  -1  -3 -10   32.67    9.39
   1   3 -10   17.47    6.48
  -1   3 -10   14.74    3.70
  -1   3 -10   40.31   22.56
   1   3 -10   42.46   27.27
   1   3  10   35.63   10.12
  -1   3  10   40.88    8.76
  -1  -3 -11   -1.29    4.67
  -1   3 -11    2.43    3.93
   1   3 -11    1.46    2.78
  -1   3 -11    0.42    2.99
   1   3 -11    2.74    5.16
   1   3  11    0.50    2.55
  -1   3  11    1.93    3.52
   1  -3 -12   -0.08    4.50
  -1  -3 -12    3.74    4.74
  -1   3 -12    1.74    1.56
   1   3 -12    1.07    2.25
  -1   3 -12    1.26    6.53
   1   3 -12    3.30    7.05
   1   3  12    1.01    4.88
  -1   3  12    2.76    6.34
   1  -3 -13    0.55    2.99
  -1  -3 -13   -0.15    4.89
   1   3 -13    1.76    5.09
  -1   3 -13    2.46    3.11
  -1   3 -13    3.08    7.04
   1   3 -13    2.51    7.51
   1   3  13    4.43    5.13
  -1   3  13    1.45    4.56
   1  -3 -14   12.86   10.59
  -1  -3 -14    6.98   12.31
  -1   3 -14    5.95    5.50
   1   3 -14    7.25    4.48
  -1   3 -14   13.80    8.66
   1   3 -14   11.41    7.24
   1   3  14   15.68    7.98
  -1   3  14   11.29    6.55
   1  -3 -15    2.61    5.60
  -1  -3 -15    2.36    3.92
   1   3 -15   -0.83    5.44
  -1   3 -15    3.31    5.48
   1   3 -15    1.36    6.50
   1   3  15    2.57    4.86
  -1   3  15    0.89    3.14
   1  -3 -16    2.37    3.66
  -1  -3 -16    2.56    4.67
   1   3 -16    0.51    3.53
  -1   3 -16    1.47    4.89
   1   3 -16    4.63    4.81
   1   3  16    2.46    5.21
  -1   3  16    2.44    4.85
   1  -3  16   -1.60    8.66
   1  -3 -17    4.22    8.02
  -1  -3 -17    3.27    4.23
   1   3 -17    3.12    3.36
  -1   3 -17    2.81    6.99
   1   3 -17    9.89    7.30
   1   3  17    4.35    5.13
  -1   3  17    8.33    6.01
   1  -3  17    5.71    4.14
   1  -3 -18    1.87    4.55
  -1  -3 -18    6.69    4.00
   1   3 -18    6.32    4.87
  -1   3 -18    3.21    7.69
   1   3 -18    6.37    7.37
   1   3  18    2.46    5.19
  -1   3  18    2.08    2.86
   1  -3  18    6.51    9.67
   1  -3 -19    1.97    4.31
  -1  -3 -19   -1.70    7.62
   1   3 -19    1.28    3.91
  -1   3 -19   -0.96    6.62
   1   3  19    3.90    8.29
  -1   3  19    1.20    6.03
   1  -3  19    0.99    5.85
  -1  -3  19    7.30   10.08
   1  -3 -20   15.00   14.08
  -1  -3 -20   19.91   15.37
  -1   3 -20   13.02    7.48
   1   3 -20   12.56    9.37
   1   3  20   18.85   11.03
  -1   3  20   20.32   17.88
   1  -3  20   22.96   14.27
  -1  -3  20   27.27   18.94
   1  -3 -21    1.44    3.29
  -1  -3 -21    2.25    6.35
   1   3 -21   -1.12    4.85
  -1   3 -21    1.15    6.75
   1   3  21    1.77    3.37
  -1   3  21    1.90    4.37
   1  -3  21    0.54    6.76
  -1  -3  21   -1.39    8.71
  -1  -3 -22    5.25   11.02
  -1   3 -22    5.21    5.74
  -1   3  22    3.71    4.39
   1   3  22    2.48    9.62
  -1   3  22    3.50    6.60
   1  -3  22    1.57    7.22
  -1  -3  22   14.09   13.40
  -2   3   0  402.91   10.82
   2  -3   0  388.32   11.10
   2   3   0  393.01   10.47
  -2  -3   0  380.70    9.03
  -2   3   0  445.01    8.53
   2  -3   0  422.04    9.06
   2   3   0  357.63    9.35
  -2  -3   0  321.70    7.86
  -2   3  -1  191.44    6.97
   2  -3   1  193.50    6.70
  -2   3   1  206.70    7.63
   2  -3  -1  200.62    7.02
   2   3  -1  198.94    6.58
  -2  -3   1  212.03    7.97
   2   3   1  187.59    6.34
  -2  -3  -1  194.94    6.05
  -2   3  -1  225.09    7.02
   2  -3   1  238.54    7.89
   2  -3  -1  223.89    4.50
   2   3  -1  201.13    7.07
  -2  -3   1  191.35    6.42
   2   3   1  142.02    6.24
  -2  -3  -1  106.29    9.23
   2   3   2   29.50    8.71
  -2   3  -2   27.15   12.22
   2  -3   2   34.62    5.23
   2   3  -2   35.87    4.92
  -2  -3   2   34.88    4.97
  -2   3   2   37.24    6.03
   2  -3  -2   30.81    5.48
   2   3   2   40.68    6.17
  -2   3  -2   42.42   12.52
   2  -3   2   34.81    6.31
   2   3  -2   37.51    6.36
  -2  -3   2   36.32   12.41
   2   3   2   20.23   11.52
  -2  -3  -2   19.14    8.68
  -2  -3  -3  133.29    6.96
   2   3   3  122.94    5.41
  -2   3  -3  120.64    6.19
   2  -3   3  112.29    5.50
   2   3  -3  127.51    4.92
  -2  -3   3  140.73    5.46
  -2   3   3  141.97    6.02
   2  -3  -3  133.06    4.87
  -2   3  -3  165.60    6.74
   2  -3   3  142.48    5.56
  -2   3   3  152.71    3.31
   2   3  -3  149.69    6.77
  -2  -3   3  147.60    6.23
   2   3   3   88.06    5.06
  -2  -3  -3  102.57    4.33
  -2   3   3  137.00    3.90
  -2  -3  -4  433.01   10.49
   2   3   4  447.56   10.78
  -2   3  -4  375.83    9.92
   2  -3   4  394.26    9.66
   2   3  -4  406.09    9.10
  -2  -3   4  492.09   10.25
  -2   3   4  524.66   11.99
   2  -3  -4  477.67   10.42
  -2   3  -4  543.48   12.52
   2  -3   4  548.19   11.94
  -2   3   4  595.01   10.80
   2   3  -4  562.31   14.55
  -2  -3   4  521.19   11.98
   2   3   4  400.39   10.07
  -2  -3  -4  462.39   10.63
  -2   3   4  524.19   10.64
  -2  -3  -5  144.98    7.26
  -2   3   5  127.33    5.11
   2   3   5  152.71    6.14
  -2   3  -5  110.15    5.41
   2   3  -5  106.67    4.67
   2  -3   5  114.63    8.65
  -2  -3   5  145.07    5.26
  -2   3   5  157.67    5.82
  -2   3  -5  173.84    7.88
   2  -3   5  152.01    5.96
  -2   3   5  173.52    4.73
   2   3  -5  146.44    6.98
  -2  -3   5  168.60    6.62
   2   3   5  132.50    5.92
  -2  -3  -5  153.76    5.63
  -2   3   5  159.25    4.84
  -2  -3  -6  351.97   21.25
  -2   3   6  322.48    6.43
   2   3   6  324.61    9.23
  -2   3  -6  238.87    9.41
   2   3  -6  216.48   16.35
   2  -3   6  265.94   23.50
  -2  -3   6  335.32   24.37
  -2   3   6  366.41   29.09
  -2   3  -6  425.71   12.26
   2  -3   6  431.04   11.70
  -2   3   6  420.41    8.97
   2   3  -6  446.49   12.30
   2   3   6  357.47   12.75
  -2  -3  -6  394.40    9.89
  -2   3   6  404.88   29.24
  -2  -3  -7   27.48    7.96
  -2   3   7   18.46    8.00
   2   3  -7   14.23    8.48
  -2   3  -7   23.70   14.58
  -2  -3   7   21.33   10.49
  -2   3   7   28.81    7.37
  -2   3  -7   37.20   19.94
   2   3  -7   30.62    6.91
  -2   3   7   26.50    9.81
   2   3   7   28.72    8.17
  -2  -3  -7   27.90    7.31
  -2   3   7   30.77    7.70
  -2  -3  -8   58.75   20.60
  -2   3   8   57.81    3.88
   2   3  -8   36.98    4.45
  -2   3  -8   39.89   14.27
  -2  -3   8   67.59    5.64
  -2   3   8   78.59    5.77
  -2   3  -8   85.75   19.76
   2   3  -8   87.78    9.09
  -2   3   8   77.97    4.38
   2   3   8   69.64    9.87
  -2   3   8   80.89    4.52
  -2  -3  -8   78.29    5.59
  -2  -3  -9   42.77   10.92
  -2   3  -9   25.59   17.31
   2   3  -9   31.32    4.48
  -2  -3   9   45.71    4.02
  -2   3   9   58.44   12.29
  -2   3  -9   52.12   19.15
   2   3  -9   64.33   15.33
  -2   3   9   57.75    4.41
   2   3   9   59.19   13.53
  -2   3   9   55.00    4.49
   2  -3 -10   33.30   10.08
  -2  -3 -10   28.67    7.38
   2   3 -10   24.09   10.50
  -2   3 -10   15.65   11.91
  -2  -3  10   30.79    3.90
  -2   3 -10   34.44    9.29
   2   3 -10   45.01    9.33
   2   3  10   39.38   19.34
  -2   3  10   40.44   10.12
   2  -3 -11   33.99    8.94
  -2  -3 -11   30.42    6.91
   2   3 -11   21.53   12.90
  -2   3 -11   18.45   13.65
  -2   3 -11   41.34    7.39
   2   3 -11   44.84   25.69
   2   3  11   39.05    8.13
  -2   3  11   39.53    8.95
   2  -3 -12   64.80    6.70
  -2  -3 -12   57.80   16.17
   2   3 -12   42.97   13.07
  -2   3 -12   32.19    6.53
   2   3 -12   74.41   10.88
   2   3  12   68.38    7.92
  -2   3  12   75.11   15.82
   2  -3 -13    2.06    4.85
  -2  -3 -13    4.42    3.85
   2   3 -13    4.45    5.32
  -2   3 -13    2.64    4.10
   2   3 -13    5.13    2.04
   2   3  13    5.23    5.68
  -2   3  13    5.46    3.83
   2  -3  13    6.22    5.01
   2  -3 -14  197.67   21.73
  -2  -3 -14  176.66   17.17
   2   3 -14  139.08   17.21
  -2   3 -14  103.03   17.91
   2   3 -14  209.92   23.46
   2   3  14  186.05   20.63
  -2   3  14  202.68   10.57
   2  -3  14  204.56   23.15
   2  -3 -15   27.77   20.86
  -2  -3 -15   21.70   13.96
   2   3 -15   20.34   14.74
  -2   3 -15   16.02    8.78
   2   3 -15   29.87   19.37
   2   3  15   34.61   19.53
  -2   3  15   26.76   16.97
   2  -3  15   30.30   13.59
   2  -3 -16   10.74    7.96
  -2  -3 -16   12.47    9.66
   2   3 -16    6.03    7.51
  -2   3 -16    4.14    5.15
   2   3 -16   15.36   12.61
   2   3  16   12.75    7.52
  -2   3  16    7.81    3.43
   2  -3  16    9.97   10.47
   2  -3 -17    9.51   10.45
  -2  -3 -17    9.47    7.31
   2   3 -17   10.12    8.26
  -2   3 -17   10.65    8.10
   2   3 -17   14.65    7.73
   2   3  17   11.41    6.03
  -2   3  17   10.20    9.32
   2  -3  17   13.24   12.47
   2  -3 -18    7.66    5.15
  -2  -3 -18    0.94    4.86
   2   3 -18   -0.07    5.11
  -2   3 -18    2.57    6.81
   2   3 -18    1.07    5.28
   2   3  18   -1.15    7.34
  -2   3  18    1.17    2.34
   2  -3  18    5.17    7.65
  -2  -3 -19    1.15    3.83
   2   3 -19    1.26    3.84
  -2   3 -19    2.23    3.98
   2   3 -19    0.41    4.52
   2   3  19    2.04    5.03
  -2   3  19    1.87    6.39
   2  -3  19    2.68    6.56
  -2  -3 -20    2.72    6.73
   2   3 -20    2.38    2.92
  -2   3 -20    3.99    2.97
  -2   3  20    2.19    3.93
   2   3  20   10.55   25.79
  -2   3  20    3.85    7.68
   2  -3  20   10.89    8.19
  -2  -3  20    2.63    8.02
  -2  -3 -21    2.95    5.29
  -2   3 -21    1.89    6.24
  -2   3  21   -2.50    4.72
   2   3  21   -0.29    7.30
  -2   3  21    5.22    6.33
   2  -3  21    2.60    6.42
  -2  -3  21    2.71    5.05
  -2  -3 -22    2.99    3.91
  -2   3 -22    0.05    5.35
   2   3  22    1.49    7.09
  -2   3  22    2.77    4.80
   2  -3  22   -2.60    8.60
  -2  -3  22    4.69    7.42
  -3   3   0    1.07    1.93
   3  -3   0    1.50    2.52
   3   3   0    2.11    1.67
  -3  -3   0    1.31    3.07
   3  -3   0    1.03    1.54
   3   3   0    5.44    5.86
  -3  -3   0    1.77    3.45
   3  -3   0    0.30    1.78
   3   3   1   46.44    6.68
  -3   3  -1   41.60   11.04
   3  -3   1   38.00   10.56
  -3   3   1   43.02   10.18
   3  -3  -1   45.10    9.65
   3   3  -1   47.11    5.97
  -3  -3   1   46.50    5.94
   3   3   1   42.27    5.49
   3  -3   1   45.54    5.57
   3   3  -1   44.52    6.49
  -3  -3   1   34.76    6.90
   3   3   1   27.11    6.48
  -3  -3  -1   24.89   11.79
   3  -3  -1   34.16    4.05
   3  -3   1   47.48    5.89
  -3   3   1   46.84    5.82
   3   3   2 1018.42   19.24
  -3   3  -2 1016.05   19.73
   3  -3   2  960.23   18.45
  -3   3   2 1154.53   24.75
   3   3  -2 1092.52   21.80
   3  -3  -2 1100.83   20.10
  -3  -3   2 1155.26   20.54
   3  -3   2 1136.32   20.67
   3   3  -2 1125.14   21.39
  -3  -3   2 1180.05   22.11
   3   3   2  537.69   12.27
  -3   3   2  995.93   16.68
   3  -3   2 1272.17   23.28
  -3  -3  -3  300.85    8.66
   3   3   3  273.98    7.83
  -3   3  -3  267.71    8.17
   3  -3   3  230.96    7.27
   3   3  -3  322.94    7.61
  -3   3   3  358.50    8.92
  -3  -3   3  347.39    7.46
   3  -3  -3  330.20    8.02
   3  -3   3  361.20    9.46
   3  -3  -3  382.28    7.01
   3   3  -3  349.30    9.70
  -3   3   3  314.73    5.76
   3   3   3  203.89    7.37
  -3  -3  -3  235.47    6.93
   3  -3   3  365.07    9.26
  -3  -3  -4  358.64   10.12
  -3   3  -4  315.69    9.38
   3  -3   4  317.19    8.90
   3   3  -4  346.55    8.11
  -3  -3   4  413.99    8.85
  -3   3   4  417.85    9.51
   3  -3  -4  386.47    8.94
   3  -3   4  429.55   12.40
   3  -3  -4  454.38    8.79
  -3   3   4  447.96    8.40
  -3  -3   4  426.88   10.60
   3   3   4  317.47    9.70
  -3  -3  -4  357.59    8.96
   3  -3   4  454.34   11.88
  -3  -3  -5   51.34    6.60
   3   3   5   58.29    7.97
  -3   3  -5   52.36    7.03
   3   3  -5   46.66    7.21
   3  -3   5   50.53    5.77
  -3  -3   5   62.97    5.64
  -3   3   5   69.10    6.66
   3  -3  -5   71.58    6.16
   3  -3   5   72.64    7.19
   3   3  -5   75.89   23.09
  -3   3   5   70.62    6.13
  -3  -3   5   61.59    9.54
   3   3   5   56.56    9.37
  -3  -3  -5   65.83    6.52
   3  -3   5   70.53   17.66
  -3   3   6    2.91    2.55
  -3  -3  -6    5.44    5.02
  -3   3  -6    5.49    4.72
   3   3  -6    3.80    2.66
   3  -3   6    3.48    3.38
  -3  -3   6    4.53    4.14
  -3   3   6    4.62    4.57
   3  -3  -6    7.33    4.99
   3  -3   6    3.54    2.71
   3   3  -6    6.14    4.70
  -3   3   6    7.97    6.56
  -3  -3   6    6.01    3.98
   3   3   6    5.88    2.89
  -3  -3  -6    5.00    3.12
   3  -3   6    3.84    5.83
  -3  -3  -7  200.11   17.82
  -3   3   7  163.72   13.14
   3   3  -7  105.55    9.14
  -3   3  -7  114.76   11.79
  -3  -3   7  177.93   14.17
  -3   3   7  202.24   15.82
   3  -3  -7  221.09   16.95
   3   3  -7  215.42   23.01
  -3   3   7  211.04   15.87
   3   3   7  182.36   15.61
  -3  -3  -7  211.66   16.55
   3  -3   7  226.05   18.48
  -3  -3  -8   21.80   15.81
  -3   3   8   14.03   10.99
  -3   3  -8   13.53    9.15
   3   3  -8   10.47    7.99
  -3  -3   8   16.68   10.34
  -3   3   8   26.27    9.59
   3  -3  -8   21.59    8.29
   3   3  -8   28.42   21.71
  -3   3   8   19.31    7.47
   3   3   8   23.16   13.80
   3  -3   8   22.64   13.06
  -3  -3  -9   41.48    5.62
  -3   3   9   35.22    3.61
  -3   3  -9   29.73   19.35
   3   3  -9   30.31    4.69
  -3  -3   9   44.00    3.37
  -3   3   9   51.24   12.59
   3  -3  -9   59.76    9.23
   3   3  -9   53.52   20.07
  -3   3   9   53.62    4.12
   3   3   9   48.54    5.17
   3  -3   9   50.08   11.71
  -3  -3 -10    0.96    4.08
   3   3 -10    0.37    2.61
  -3   3 -10    0.63    2.46
  -3  -3  10    1.76    1.37
  -3   3  10    0.12    2.71
   3  -3 -10   -0.05    4.57
   3   3 -10    0.61    3.05
  -3   3  10    0.51    1.70
   3   3  10    3.85    3.29
   3  -3  10   -0.34    3.88
  -3  -3 -11   13.05    7.56
   3   3 -11    8.27    7.42
  -3   3 -11    8.36    6.69
  -3  -3  11    8.26    6.09
  -3   3  11   15.83    8.26
   3   3 -11   13.58   10.46
   3   3  11   11.26   13.66
   3  -3  11   13.54    8.23
  -3  -3 -12   34.85   19.07
   3   3 -12   33.40    6.55
  -3   3 -12   23.10   13.60
  -3   3  12   45.72    9.83
   3   3 -12   50.41   14.12
   3   3  12   46.59    9.52
  -3   3  12   52.26    9.30
   3  -3  12   60.05   29.37
  -3  -3 -13    5.23    4.54
   3   3 -13    3.75    4.14
  -3   3 -13    2.23    4.43
  -3   3  13    1.00    3.52
   3   3 -13    1.14    3.87
   3   3  13    5.28    5.70
   3  -3  13    2.24    4.48
  -3   3  13    1.45    3.32
  -3  -3 -14   24.56   15.40
   3   3 -14   21.12   15.60
  -3   3 -14   13.63    9.86
  -3   3  14   22.95   11.14
   3   3 -14   30.19   23.32
   3   3  14   30.36   16.10
   3  -3  14   36.24   24.77
  -3   3  14   32.19   17.32
  -3  -3 -15    9.28    6.65
   3   3 -15   10.02    7.36
  -3   3 -15    8.90    9.06
  -3   3  15   12.21    8.52
   3   3 -15   13.21   10.50
   3   3  15   11.10    8.27
   3  -3  15   11.71    8.09
  -3   3  15   13.56    7.71
  -3  -3 -16   40.66    8.88
   3   3 -16   34.05   12.79
  -3   3 -16   32.15    6.89
  -3   3  16   56.18   13.97
   3   3 -16   53.46   10.32
   3   3  16   64.22   14.09
   3  -3  16   57.52   29.43
  -3   3  16   49.26   10.93
  -3  -3 -17    5.76    7.35
   3   3 -17    4.76    5.70
  -3   3 -17    5.46    6.35
  -3   3  17    2.24    3.55
   3   3 -17    3.82    6.77
   3   3  17    4.31    5.36
  -3   3  17    7.91    4.54
   3  -3  17    4.26    5.32
  -3  -3 -18  235.49   31.79
   3   3 -18  255.65   34.83
  -3   3 -18  185.73   25.44
  -3   3  18  261.10   32.74
   3   3 -18  298.10   38.92
   3   3  18  261.32   33.88
  -3   3  18  263.56   33.67
   3  -3  18  301.19   39.79
  -3  -3 -19    1.46    9.28
   3   3 -19    4.26    2.31
  -3   3 -19    3.62    9.04
  -3   3  19    3.57    3.02
   3   3 -19   -0.98    9.28
   3   3  19   -1.80    7.89
   3  -3  19   -0.55   10.94
  -3   3  19    2.97    5.62
  -3  -3 -20   42.67   18.58
  -3   3 -20   32.49   32.41
  -3   3  20   38.46   10.26
   3   3 -20   46.10   29.76
   3   3  20   46.47   32.48
  -3   3  20   38.78   29.97
   3  -3  20   43.82   32.87
  -3  -3 -21   19.51   15.28
  -3   3 -21   10.40   12.09
   3   3  21   20.03   16.81
  -3   3  21   20.66   16.26
   3  -3  21   21.20   12.94
   4   3   0 1700.59   29.88
  -4   3   0 1680.18   30.41
   4  -3   0 1589.93   28.55
   4   3   0 1703.82   30.23
   4   3   0 1369.05   25.53
  -4  -3   0 1279.53   23.72
   4  -3   0 1701.42   29.59
  -4   3   0 1779.86   30.48
   4   3  -1   61.54    6.89
   4   3   1   66.29    7.76
  -4   3  -1   53.96   13.95
   4  -3   1   53.82    6.68
  -4   3   1   68.00   13.62
   4  -3  -1   59.60    7.29
   4   3  -1   62.56    7.67
   4   3  -1   58.02    8.15
  -4  -3   1   61.51   11.79
   4   3   1   40.15    7.12
  -4  -3  -1   33.42    7.88
   4  -3  -1   42.47    4.94
   4  -3   1   66.99    7.85
  -4   3   1   58.37    6.34
  -4   3  -1   59.87    8.53
  -4  -3  -2  899.41   17.94
   4   3   2 1007.24   19.31
  -4   3  -2  925.06   18.36
   4  -3   2  901.15   17.86
  -4   3   2 1138.98   21.38
   4  -3  -2 1055.75   19.48
   4   3  -2 1141.44   20.47
  -4  -3   2 1135.21   20.15
   4   3  -2 1116.89   21.72
   4  -3  -2  905.14   15.72
   4   3   2  578.52   13.04
  -4  -3  -2  567.41   12.19
  -4   3   2  743.06   13.35
   4  -3   2 1199.41   22.36
  -4  -3  -3  842.49   17.54
  -4   3  -3  777.85   16.32
   4  -3   3  729.41   15.26
   4   3  -3  957.24   17.36
  -4   3   3 1053.59   20.10
   4  -3  -3  976.23   18.21
  -4  -3   3 1037.31   18.47
   4  -3   3 1062.99   20.18
   4  -3  -3 1066.60   18.57
  -4  -3   3  998.38   20.08
  -4   3   3  641.11   11.46
   4   3   3  578.72   20.63
  -4  -3  -3  644.88   13.74
   4  -3   3 1042.86   20.57
  -4  -3  -4 1053.08   20.95
  -4   3  -4  939.90   20.40
   4  -3   4  904.40   20.34
   4   3  -4 1050.58   18.20
  -4   3   4 1313.05   24.57
  -4  -3   4 1245.32   21.16
   4  -3  -4 1188.31   21.12
   4  -3   4 1331.42   24.28
   4  -3  -4 1380.16   23.03
   4   3  -4 1324.32   26.56
  -4  -3   4 1309.90   24.42
  -4   3   4 1219.67   20.37
   4   3   4  915.59   19.10
  -4  -3  -4 1007.14   19.98
   4  -3   4 1254.19   28.00
  -4  -3  -5   46.88   11.81
   4   3   5   34.89    6.71
  -4   3  -5   30.00    6.29
   4   3  -5   33.32    6.17
   4  -3   5   33.41    4.95
  -4  -3   5   48.08    4.84
  -4   3   5   46.71    5.02
   4  -3  -5   42.24    4.56
   4  -3   5   53.39    6.44
   4  -3  -5   53.39    5.16
   4   3  -5   52.91    7.22
  -4   3   5   48.77    4.50
  -4  -3   5   50.02   12.17
   4   3   5   33.85    8.33
  -4  -3  -5   54.51   12.06
   4  -3   5   57.05    8.26
  -4   3   6   10.86    7.91
  -4  -3  -6    9.69    5.03
  -4   3  -6    9.50    7.69
   4   3  -6    7.85    5.21
  -4  -3   6    9.15    5.11
  -4   3   6   12.77    6.49
   4  -3  -6   12.15    7.33
   4   3  -6   10.72    6.98
  -4   3   6   10.58    7.03
   4   3   6   13.89    7.86
  -4  -3  -6   10.76    7.64
   4  -3   6   12.67    8.88
  -4   3   7    0.78    2.20
  -4  -3  -7    0.99    2.59
  -4   3  -7    0.71    3.25
   4   3  -7   -0.70    2.30
  -4   3   7    0.13    2.94
   4  -3  -7   -0.17    3.32
   4   3  -7    0.66    5.08
  -4   3   7    0.47    1.89
   4   3   7    2.22    2.46
   4  -3   7    1.47    4.76
  -4  -3  -8   39.32   23.71
  -4   3   8   32.14    5.05
  -4   3  -8   21.26   18.34
   4   3  -8   20.72    2.94
  -4  -3   8   43.20    3.16
  -4   3   8   43.23   10.27
   4  -3  -8   45.50    4.59
   4   3  -8   44.92   16.49
  -4   3   8   41.62    3.09
   4   3   8   42.16   10.80
   4  -3   8   45.53   21.44
  -4  -3  -9  180.19   15.64
  -4   3   9  159.79   12.53
   4   3  -9  133.33   10.64
  -4   3  -9  115.25   11.51
  -4  -3   9  203.22   15.11
  -4   3   9  223.26   19.37
   4  -3  -9  244.81   20.05
   4   3  -9  249.58   20.41
  -4   3   9  236.17   17.84
   4   3   9  204.64   24.11
   4  -3   9  251.03   20.37
  -4  -3 -10   53.79   21.54
  -4   3  10   40.39    3.61
   4   3 -10   46.80    6.85
  -4   3 -10   36.21    6.17
  -4  -3  10   54.04    5.45
  -4   3  10   60.19    8.00
   4  -3 -10   70.27    7.24
   4   3 -10   73.92    9.68
  -4   3  10   62.90    4.00
   4   3  10   67.24   18.97
   4  -3  10   61.57    8.36
  -4  -3 -11   42.00    7.10
   4   3 -11   34.34    6.76
  -4   3 -11   25.14   21.69
  -4  -3  11   41.44    7.98
  -4   3  11   56.89   12.56
   4  -3 -11   54.28    5.89
   4   3 -11   51.45   10.63
   4   3  11   42.10    5.77
   4  -3  11   51.50    7.55
  -4  -3 -12  288.91   23.45
   4   3 -12  278.81   22.24
  -4   3 -12  192.93   16.12
  -4  -3  12  312.46   22.38
  -4   3  12  342.24   25.10
   4  -3 -12  384.32   32.57
   4   3 -12  386.11   39.51
   4   3  12  342.12   26.31
   4  -3  12  373.58   33.40
  -4  -3 -13   36.38    7.64
   4   3 -13   34.34    4.97
  -4   3 -13   25.06   17.79
  -4   3  13   41.37   17.99
   4  -3 -13   45.85    6.96
   4   3 -13   47.81   10.69
   4   3  13   40.48    7.58
   4  -3  13   53.09   13.63
  -4  -3 -14  492.95   30.57
   4   3 -14  469.97   26.44
  -4   3 -14  305.93   33.09
  -4   3  14  576.74   32.11
   4   3 -14  657.12   22.16
   4   3  14  578.96   16.30
   4  -3  14  652.68   41.52
  -4   3  14  607.76   62.15
  -4  -3 -15    0.64    6.57
   4   3 -15    1.18    4.05
  -4   3 -15    0.05    7.17
  -4   3  15   -0.55    3.97
   4   3 -15    0.99   10.22
   4   3  15    2.82    3.42
   4  -3  15    0.50    3.79
  -4   3  15    2.45    3.89
  -4  -3 -16  149.54   21.09
   4   3 -16  160.22   20.76
  -4   3 -16  102.90   15.28
  -4   3  16  177.63   22.74
   4   3 -16  210.59   28.50
   4   3  16  185.90   32.57
   4  -3  16  211.86   39.60
  -4   3  16  195.72   25.48
  -4  -3 -17    2.17    5.82
   4   3 -17    3.82    3.30
  -4   3 -17    3.65    3.78
  -4   3  17    3.05    4.00
   4   3 -17    3.84    7.28
   4   3  17    3.26    6.50
   4  -3  17    5.25    6.09
  -4   3  17    4.86    5.48
  -4  -3 -18   50.01   37.55
   4   3 -18   49.09    5.26
  -4   3 -18   36.29   24.22
  -4   3  18   49.62    9.67
   4   3 -18   63.58   19.83
   4   3  18   55.09   13.23
   4  -3  18   66.73   36.50
  -4   3  18   65.31   11.98
  -4  -3 -19   31.85   22.15
  -4   3 -19   17.83   17.10
  -4   3  19   18.58   19.76
   4   3 -19   37.09   22.99
   4   3  19   29.76   13.70
   4  -3  19   37.20   18.68
  -4   3  19   34.11   13.13
  -4  -3 -20   11.76    6.27
  -4   3 -20    4.37    8.61
   4   3 -20    9.66   15.40
   4   3  20    6.17    9.32
   4  -3  20    6.52    7.00
  -4   3  20    4.45    4.53
  -4  -3 -21    3.97    6.49
  -4   3 -21   -1.51    6.79
   4   3 -21    7.10    9.82
   4   3  21    1.42    7.53
   4  -3  21   -3.62    9.35
  -4   3  21    2.34    5.07
   5   3   0    0.65    2.22
  -5   3   0    0.31    3.27
   5  -3   0    0.49    2.96
   5   3   0    2.02    1.93
   5   3   0    2.98    4.68
  -5  -3   0   -0.21    3.47
   5  -3   0    1.23    1.81
  -5   3   0    1.16    1.67
  -5  -3  -1  324.41    8.92
   5   3  -1  353.58    9.01
   5   3   1  317.89    8.23
  -5   3  -1  321.50    9.91
  -5   3   1  348.90    9.10
   5  -3   1  276.56    9.33
   5  -3  -1  329.77    9.73
   5   3  -1  330.50    9.39
   5   3  -1  305.18    8.99
  -5  -3   1  279.11    8.49
   5   3   1  202.32    7.39
  -5  -3  -1  190.01    6.90
   5  -3  -1  198.48    5.35
   5  -3   1  354.26    8.92
  -5   3   1  302.55    6.83
  -5   3  -1  349.68    8.17
  -5  -3  -2   85.93    6.01
   5   3  -2  100.67    4.63
   5   3   2   96.60    6.26
  -5   3  -2   81.35   10.93
   5  -3   2   74.22    5.90
  -5   3   2   96.14    4.98
   5  -3  -2   99.62    5.01
   5   3  -2   93.33    4.10
   5   3  -2   99.84    5.94
  -5  -3   2   88.87    6.53
   5  -3  -2   68.95    3.22
   5   3   2   57.83    5.55
  -5  -3  -2   54.88    4.87
  -5   3   2   60.18    3.31
   5  -3   2  111.13    5.62
  -5   3  -2  109.18    4.58
  -5  -3  -3    5.85    4.42
   5   3   3    8.04    5.61
  -5   3  -3    5.67    3.66
   5  -3   3    5.43    3.29
  -5   3   3    7.15    5.99
   5   3  -3    5.95    4.42
   5  -3  -3    7.03    3.62
  -5  -3   3    7.43    4.74
   5   3  -3    4.93    3.18
   5  -3  -3    8.10    4.80
  -5  -3   3    2.81    5.97
  -5   3   3    3.66    2.48
   5   3   3    4.46    3.94
  -5  -3  -3    5.95    3.88
   5  -3   3    8.79    5.66
  -5   3  -3    7.27    4.23
  -5  -3  -4  144.03   12.60
   5   3   4  158.54   13.02
  -5   3  -4  139.96   12.14
   5  -3   4  127.50   15.60
   5   3  -4  167.51   12.66
  -5   3   4  188.12   14.36
   5  -3  -4  179.38   13.53
  -5  -3   4  206.35   15.50
   5  -3   4  193.01   15.02
   5  -3  -4  204.20   15.10
   5   3  -4  192.33   16.15
  -5  -3   4  180.86   14.24
  -5   3   4  151.89   11.27
   5   3   4  117.50   10.72
  -5  -3  -4  143.21   11.92
   5  -3   4  202.21   20.47
  -5  -3  -5   12.54    9.12
  -5   3  -5    9.83    6.49
   5   3  -5    9.62    5.85
  -5   3   5   12.77    8.68
  -5  -3   5   12.05    5.67
   5  -3  -5   13.49    4.93
   5  -3   5    9.49    6.67
   5  -3  -5   13.13    7.08
   5   3  -5   11.11    9.70
  -5   3   5   12.07    7.41
   5   3   5    9.28    7.20
   5  -3   5   17.92   14.55
  -5   3   6  119.75   13.79
  -5  -3  -6  108.13   15.02
  -5   3  -6   74.72   12.48
   5   3  -6   79.07    6.25
  -5  -3   6  174.24   21.84
  -5   3   6  156.61   18.99
   5  -3  -6  155.54   18.74
   5   3  -6  154.97   19.28
  -5   3   6  147.92   17.66
   5   3   6  128.54   15.90
   5  -3   6  166.84   20.24
  -5   3   7   36.51    3.38
  -5  -3  -7   32.26   20.38
  -5   3  -7   29.32   18.65
   5   3  -7   25.79    3.27
  -5  -3   7   38.82    5.24
  -5   3   7   47.28    3.69
   5  -3  -7   51.86    4.91
   5   3  -7   46.66   12.57
  -5   3   7   42.11    2.89
   5   3   7   46.32   16.94
   5  -3   7   48.16    6.13
  -5   3   8   13.93    8.03
  -5  -3  -8   17.22   12.65
   5   3  -8   12.27    4.91
  -5   3  -8   11.22    5.98
  -5  -3   8   20.06    5.46
  -5   3   8   22.45   11.83
   5  -3  -8   21.22   10.87
   5   3  -8   24.31   16.05
  -5   3   8   21.11    5.88
   5   3   8   18.35   11.07
   5  -3   8   28.15   16.10
  -5  -3  -9   58.38   12.18
  -5   3   9   50.69    6.43
   5   3  -9   55.12    3.62
  -5   3  -9   36.36    5.66
  -5  -3   9   84.49    4.17
  -5   3   9   87.02    5.41
   5  -3  -9   92.42    6.57
   5   3  -9   94.62    9.24
  -5   3   9   79.06    8.58
   5   3   9   82.87   16.18
   5  -3   9   83.89   21.92
  -5  -3 -10    4.69    5.43
  -5   3  10    1.55    2.91
   5   3 -10    1.02    1.74
  -5   3 -10    0.90    2.88
  -5  -3  10    3.01    2.95
  -5   3  10    1.36    2.44
   5  -3 -10    4.17    5.41
   5   3 -10   -2.03    6.18
  -5   3  10    1.43    2.19
   5   3  10    1.56    5.38
   5  -3  10   -2.93    8.18
  -5  -3 -11   26.83   18.84
   5   3 -11   25.12    7.24
  -5   3 -11   23.02   16.97
  -5  -3  11   27.55    5.97
  -5   3  11   35.69   10.28
   5  -3 -11   36.64    6.56
   5   3 -11   38.35   20.83
   5   3  11   38.54   12.67
   5  -3  11   42.73   23.88
  -5  -3 -12  110.74   13.37
   5   3 -12  121.49   10.23
  -5   3 -12   80.45   10.64
  -5  -3  12  131.21   10.17
  -5   3  12  160.82   13.45
   5  -3 -12  159.78   16.24
   5   3 -12  159.58   15.14
   5   3  12  149.56   14.52
   5  -3  12  153.29   19.22
  -5  -3 -13   92.01   13.74
   5   3 -13  114.43   12.30
  -5   3 -13   68.24   16.56
  -5  -3  13   98.34   10.39
  -5   3  13  111.21   17.84
   5  -3 -13  125.14   16.67
   5   3 -13  121.91   16.07
   5   3  13  116.23   22.60
   5  -3  13  130.30   23.29
  -5  -3 -14  149.21   23.54
   5   3 -14  180.43   18.17
  -5   3 -14   94.94   12.30
  -5   3  14  201.35   20.97
   5  -3 -14  209.46   22.78
   5   3 -14  213.41   23.59
   5   3  14  191.29   21.67
   5  -3  14  226.17   36.85
  -5  -3 -15   59.94   22.79
   5   3 -15   68.16    8.67
  -5   3 -15   39.20   18.26
  -5   3  15   73.53   10.56
   5  -3 -15   81.48   11.51
   5   3 -15   65.78   15.70
   5   3  15   78.89   14.39
   5  -3  15   74.91   12.85
  -5  -3 -16  177.29   23.98
   5   3 -16  219.80   26.67
  -5   3 -16  126.81   24.53
  -5   3  16  245.58   30.08
   5   3 -16  254.62   34.11
   5   3  16  236.96   30.62
   5  -3  16  286.33   37.35
  -5   3  16  233.78   30.84
  -5  -3 -17   -1.46    8.78
   5   3 -17   -0.07    3.36
  -5   3 -17   -0.73    7.15
  -5   3  17   -1.97    4.41
   5   3 -17   -1.86    8.82
   5   3  17   -3.37    8.74
   5  -3  17    1.15    6.07
  -5   3  17   -0.03    5.88
  -5  -3 -18  224.86   31.77
  -5   3 -18  149.64   21.82
  -5   3  18  255.70   33.22
   5   3 -18  274.81   44.81
   5   3  18  257.63   46.75
   5  -3  18  297.17   40.49
  -5   3  18  259.52   37.03
  -5  -3 -19   10.38   10.67
  -5   3 -19    7.83    7.29
   5   3 -19   14.89    7.20
   5   3  19   11.40   10.60
   5  -3  19   13.23   11.71
  -5   3  19    9.49   10.35
  -5  -3 -20  149.43   25.82
  -5   3 -20  111.45   23.67
   5   3 -20  184.85   23.74
   5   3  20  168.24   27.97
   5  -3  20  208.18   28.19
  -5   3  20  183.22   22.73
  -5  -3 -21    2.93    6.56
  -5   3 -21    1.39    7.64
   5   3 -21   -1.98    8.71
   5   3  21   -0.32    6.97
   5  -3  21   -3.91    9.73
  -5   3  21    2.41    3.43
  -6  -3   0 1225.40   22.18
  -6   3   0 1422.54   25.80
   6  -3   0 1202.97   22.15
   6   3   0 1034.73   21.75
  -6  -3   0  974.87   19.52
   6  -3   0 1160.87   20.95
  -6   3   0 1393.42   24.15
  -6  -3  -1  167.10   15.16
   6   3  -1  186.89   14.05
   6   3   1  178.85   14.46
  -6   3  -1  166.27   13.36
  -6   3   1  187.57   15.71
   6  -3   1  152.53   12.10
   6  -3  -1  168.77   14.97
   6   3  -1  188.57   14.87
   6   3  -1  148.11   12.16
   6   3   1  114.84   10.84
  -6  -3   1  145.58   11.67
   6  -3  -1  116.72    9.77
  -6  -3  -1  114.26    9.93
   6  -3   1  194.36   15.68
  -6   3   1  144.82   13.19
  -6   3  -1  190.48   14.42
  -6  -3  -2 1866.04   35.80
   6   3  -2 2087.74   35.64
   6   3   2 2007.13   35.03
  -6   3  -2 1996.43   37.16
   6  -3   2 1735.79   30.96
  -6   3   2 2314.78   39.19
   6  -3  -2 2125.27   36.38
   6   3  -2 2085.13   37.20
   6   3   2 1447.03   27.67
  -6   3   2 1502.04   27.28
  -6   3  -2 2363.51   40.41
   6   3  -3   18.04    6.91
  -6  -3  -3   18.10   13.20
   6   3   3   17.63    4.98
  -6   3  -3   18.40   12.68
   6  -3   3   10.10    6.48
  -6   3   3   23.59   13.53
   6  -3  -3   18.57   10.90
   6   3  -3   16.72    4.91
   6   3  -3   19.77   12.13
   6  -3  -3   18.83   10.81
   6   3   3   15.90    8.64
  -6   3   3   12.94    8.46
   6  -3   3   23.69   16.14
  -6   3  -3   17.61   11.56
   6   3  -4  542.64   10.00
  -6  -3  -4  419.55   12.04
  -6   3  -4  385.55   12.62
  -6   3   4  516.45   11.90
   6   3  -4  451.93   19.85
   6  -3  -4  489.70   10.47
   6   3  -4  549.07   15.84
   6  -3  -4  538.52   11.47
  -6   3   4  370.03    8.99
   6   3   4  317.26   11.09
   6  -3   4  557.11   14.79
  -6   3  -4  508.78   12.64
  -6  -3  -5   65.46   13.86
  -6   3  -5   45.87    5.61
  -6   3   5  124.70   22.21
   6  -3  -5   66.07    5.63
  -6  -3   5   84.73    2.89
   6  -3  -5   85.41    4.78
   6   3  -5   77.86    6.39
  -6   3   5   63.96    5.27
   6   3   5   53.64    6.80
   6  -3   5   84.93   11.69
  -6  -3  -6  509.25   14.38
  -6   3  -6  447.58   13.15
  -6   3   6  716.71   17.02
  -6  -3   6  716.59   11.95
   6  -3  -6  596.29   14.43
   6  -3  -6  749.70   14.43
   6   3  -6  713.63   17.64
  -6   3   6  677.97   12.92
   6   3   6  537.48   25.99
   6  -3   6  715.48   17.97
  -6   3   7  107.94    5.88
  -6  -3  -7  101.52   24.98
  -6   3  -7   86.03   11.89
   6   3  -7   80.87    9.94
  -6   3   7  141.86   16.52
  -6  -3   7  138.57   15.50
   6  -3  -7  148.64   17.56
   6   3  -7  143.42   16.99
  -6   3   7  138.83   15.70
   6   3   7  108.93   17.02
   6  -3   7  142.99   21.05
  -6   3   8  244.05   17.94
  -6  -3  -8  227.05   18.23
   6   3  -8  215.18   15.55
  -6   3  -8  190.23   21.35
  -6  -3   8  327.80   23.36
  -6   3   8  334.51   26.30
   6  -3  -8  355.94   26.42
   6   3  -8  340.88   26.10
  -6   3   8  344.77   24.96
   6   3   8  286.03   22.94
   6  -3   8  336.45   27.45
  -6   3   9   17.67    6.33
  -6  -3  -9   21.29   15.97
   6   3  -9   24.67    4.31
  -6   3  -9   17.82   14.49
  -6  -3   9   28.61    3.69
  -6   3   9   32.66    8.43
   6  -3  -9   33.37   13.50
   6   3  -9   40.53   18.63
  -6   3   9   29.43    5.49
   6   3   9   28.68   21.43
   6  -3   9   38.93   26.72
  -6  -3 -10  575.25   30.39
  -6   3  10  492.93   19.56
   6   3 -10  667.30   25.33
  -6   3 -10  465.84   21.46
  -6  -3  10  827.39   31.75
  -6   3  10  858.70   35.09
   6  -3 -10  868.17   36.95
   6   3 -10  875.19   36.01
   6   3  10  750.81   32.81
   6  -3  10  883.00   36.78
  -6  -3 -11   19.84   13.34
   6   3 -11   28.35   10.10
  -6   3  11   16.02    5.90
  -6   3 -11   21.49   16.66
  -6  -3  11   28.50    4.65
  -6   3  11   37.00   11.39
   6  -3 -11   37.04   13.26
   6   3 -11   32.29    5.83
   6   3  11   33.41   24.20
   6  -3  11    4.37    6.60
  -6  -3 -12  280.45   26.25
   6   3 -12  327.87   27.18
  -6   3 -12  222.10   20.81
  -6  -3  12  356.48   28.76
  -6   3  12  361.37   29.21
   6  -3 -12  384.06   31.53
   6   3 -12  383.69   35.53
   6   3  12  365.91   33.68
   6  -3  12  398.51   48.68
  -6  -3 -13   -0.58    8.14
   6   3 -13    3.03    3.08
  -6   3 -13    2.94    3.14
  -6   3  13    1.33    3.55
   6  -3 -13    6.66    4.92
   6   3 -13    2.13    7.81
   6   3  13    2.22    3.57
   6  -3  13   -0.18    8.65
  -6  -3 -14  392.78   15.45
   6   3 -14  464.62   29.84
  -6   3 -14  290.99   30.32
  -6   3  14  525.56   14.18
   6  -3 -14  523.22   54.93
   6   3 -14  574.78   58.03
   6   3  14  502.82   49.86
   6  -3  14  549.92   58.01
  -6  -3 -15    9.59    4.77
   6   3 -15    6.65    5.02
  -6   3 -15    0.87    3.40
  -6   3  15    7.98    4.57
   6  -3 -15    9.98    4.27
   6   3 -15    5.57    8.30
   6   3  15    7.50    7.23
   6  -3  15    7.00    8.47
  -6  -3 -16  142.37   30.33
   6   3 -16  178.53   20.02
  -6   3 -16  108.83   12.34
  -6   3  16  218.77   25.10
   6  -3 -16  207.04   10.20
   6   3 -16  204.94   32.09
   6   3  16  189.66   24.05
   6  -3  16  219.40   29.35
  -6  -3 -17   34.05   20.36
  -6   3 -17   28.05   21.57
  -6   3  17   44.86   14.18
   6   3 -17   60.29   25.18
   6   3  17   43.25   19.19
   6  -3  17   54.46   10.55
  -6   3  17   51.60   15.77
  -6  -3 -18  114.27   27.00
  -6   3 -18   94.06   28.04
   6   3 -18  171.47   16.62
   6   3  18  154.09   24.11
   6  -3  18  153.43   38.72
  -6   3  18  153.44   30.63
  -6  -3 -19    2.69    7.78
  -6   3 -19   -1.87    6.84
   6   3 -19   -4.15    8.25
   6   3  19    0.83    7.91
   6  -3  19    4.11    5.08
  -6   3  19    0.29    3.85
  -6  -3 -20   27.47   23.52
  -6   3 -20   22.60   15.28
   6   3 -20   36.44   22.90
   6   3  20   28.51   29.51
   6  -3  20   32.97   17.28
  -6   3  20   25.97    6.95
  -6  -3 -21    5.86    7.76
  -6   3 -21    3.42    6.56
   6   3 -21    3.85    4.84
   6   3  21    0.92    6.74
  -7  -3   0    0.91    3.14
   7   3   0   -0.03    1.73
  -7   3   0   -3.22    5.25
   7  -3   0   -4.35   13.29
   7   3   0   -5.04   11.73
   7  -3   0    0.99    3.46
  -7   3   0    1.75    3.95
  -7  -3  -1    7.40    4.70
   7   3  -1    5.91    4.96
   7   3   1    6.65    5.62
  -7   3  -1    8.69    3.47
  -7   3   1   10.18    6.95
   7  -3   1   -0.88   10.26
   7  -3  -1   -2.69   17.38
   7   3  -1    8.62    4.46
   7   3  -1    6.86    6.39
   7   3   1    3.86    7.07
   7  -3  -1    8.12    5.07
   7  -3   1    8.04    6.25
  -7   3   1    5.53    3.27
  -7   3  -1    6.61    3.87
  -7  -3  -2    8.92    4.74
   7   3  -2   10.54    6.96
   7   3   2    9.88    5.17
  -7   3  -2   11.47    4.27
   7  -3   2    3.93    3.15
  -7   3   2    6.84    5.24
   7  -3  -2   13.83   14.73
   7   3  -2   10.60    6.65
   7   3  -2    8.70   15.75
   7  -3  -2   20.16   11.80
   7   3   2    9.77    7.12
  -7   3   2    7.24    4.80
   7  -3   2   10.69    7.49
  -7   3  -2    8.57    3.37
  -7  -3  -3    2.86    4.75
   7   3  -3    0.71    1.74
   7   3   3    1.71    2.94
  -7   3  -3    1.65    2.08
   7   3  -3    1.12    2.69
   7  -3  -3    6.51    7.83
   7   3   3   -0.11    5.28
  -7   3   3    1.74    2.60
   7  -3   3   -0.10    4.73
  -7   3  -3    1.47    2.28
  -7  -3  -4  135.66   19.24
   7   3  -4  188.82   20.83
  -7   3  -4  127.85   15.88
  -7   3   4  209.84   24.38
   7   3  -4  166.39   22.73
   7  -3  -4  176.70   19.85
   7  -3  -4  194.39   22.01
   7   3  -4  197.82   24.45
  -7   3   4  119.95   14.04
   7   3   4  126.21   18.80
   7  -3   4  213.94   24.84
  -7  -3  -5    0.40    6.24
   7   3  -5    0.51    1.28
  -7   3  -5   -0.46    5.33
   7   3  -5    3.67    3.20
  -7   3   5   -0.17    4.23
   7  -3  -5   -0.39    2.31
   7  -3  -5    1.05    1.73
   7   3  -5   -0.72   11.70
  -7   3   5    0.09    1.14
   7   3   5    1.10    6.53
   7  -3   5    1.42    2.67
   7   3  -6  335.33   36.58
  -7  -3  -6  225.79   27.12
  -7   3  -6  199.23   24.02
  -7   3   6  347.86   39.54
   7  -3  -6  287.90   32.10
   7  -3  -6  347.85   39.53
   7   3  -6  324.54   37.64
  -7   3   6  292.73   32.34
   7   3   6  249.33   28.85
   7  -3   6  330.65   37.44
  -7   3   7   11.37    4.33
  -7  -3  -7   12.14    5.91
  -7   3  -7   11.17    6.86
  -7   3   7   16.26   10.26
   7  -3  -7   18.74   14.55
   7   3  -7    7.55    8.37
  -7   3   7   10.78    8.04
   7   3   7   12.40   10.87
   7  -3   7   16.88   11.82
  -7   3   8  135.14   11.74
  -7  -3  -8  127.45   24.67
  -7   3  -8  118.69   12.32
  -7   3   8  194.14   14.51
  -7  -3   8  196.37   14.12
   7  -3  -8  208.08   16.16
   7   3  -8  191.39   21.62
  -7   3   8  187.72   14.20
   7   3   8  160.93   14.54
   7  -3   8  187.24   16.76
  -7   3   9   26.17    8.31
  -7  -3  -9   32.47    9.01
   7   3  -9   38.72    2.00
  -7   3  -9   20.96   13.88
  -7   3   9   42.52    4.31
  -7  -3   9   40.85    2.03
   7  -3  -9   43.57    6.07
   7   3  -9   48.54   10.06
  -7   3   9   38.94    5.94
   7   3   9   38.54    7.39
   7  -3   9   41.83   16.09
  -7  -3 -10   57.58   13.72
   7   3 -10   79.82    6.07
  -7   3  10   44.37    6.27
  -7   3 -10   50.96   15.59
  -7  -3  10   78.33    2.58
  -7   3  10   85.95    5.00
   7  -3 -10   92.20    7.23
   7   3 -10   85.39    8.03
   7   3  10   69.43   13.60
   7  -3  10   85.62   11.61
   7   3 -11   28.74    4.94
  -7  -3 -11   21.63   12.89
  -7   3  11   11.69    8.11
  -7   3 -11   21.53   10.09
  -7  -3  11   25.57    5.59
  -7   3  11   28.41    8.61
   7  -3 -11   30.72   13.88
   7   3 -11   36.25   19.30
   7   3  11   29.42   20.82
   7  -3  11   35.73   28.93
  -7  -3 -12   70.99   22.73
   7   3 -12   95.29    9.76
  -7   3  12   43.88    6.08
  -7   3 -12   67.40   24.35
  -7   3  12  107.31   13.22
   7  -3 -12  103.75   15.77
   7   3 -12  107.38   14.28
   7   3  12  102.42   38.30
   7  -3  12  109.95   15.83
  -7  -3 -13    3.31    3.74
   7   3 -13    2.04    2.68
  -7   3 -13    2.00    3.89
  -7   3  13    3.38    2.69
   7  -3 -13    5.41    3.45
   7   3 -13    3.23    6.14
   7   3  13    3.73    3.85
   7  -3  13    4.44    7.36
   7   3 -14  367.91   40.97
  -7  -3 -14  262.19   31.62
  -7   3 -14  190.79   27.13
  -7   3  14  388.67   44.53
   7  -3 -14  347.60   39.50
   7   3 -14  373.60   43.61
   7   3  14  330.83   38.82
   7  -3  14  371.19   44.01
  -7  -3 -15    8.88    6.46
  -7   3 -15    6.55    5.99
  -7   3  15    9.77    8.05
   7  -3 -15   11.31    7.20
   7   3 -15   13.92   10.11
   7   3  15    5.86   11.04
   7  -3  15   10.19    8.58
  -7  -3 -16  226.57   27.98
  -7   3 -16  167.80   29.91
   7  -3 -16  296.75   33.41
   7   3 -16  318.56   36.88
   7   3  16  279.70   45.52
   7  -3  16  328.25   42.64
  -7  -3 -17    8.55    5.67
  -7   3 -17    4.16    5.60
   7  -3 -17   13.37    8.76
   7   3 -17    8.12    5.59
   7   3  17   12.88    7.68
   7  -3  17   12.38    9.30
  -7  -3 -18  379.09   31.65
  -7   3 -18  298.71   15.27
   7   3 -18  525.39   45.13
   7   3  18  488.75   40.29
   7  -3  18  572.89   51.55
  -7   3  18  509.37   38.64
  -7  -3 -19   -0.50    8.31
  -7   3 -19    3.09    5.65
   7   3 -19   -1.83    8.09
   7   3  19    2.23    5.51
   7  -3  19    3.17    8.67
  -7   3  19    3.13    4.50
  -7  -3 -20  199.60   40.99
  -7   3 -20  147.09   34.99
   7   3 -20  273.93   42.98
   7   3  20  222.40   45.95
   7  -3  20  272.78   44.01
  -7  -3 -21   -2.07    8.72
  -7   3 -21    2.28    4.62
   7   3 -21    3.14    4.94
   7   3  21   -0.80    8.63
   7  -3  21   -0.48    9.35
   8   3   0 2962.77   47.15
  -8   3   0 3129.70   51.38
   8  -3   0 2634.76   55.15
   8   3   0 2287.37   40.92
   8  -3   0 2333.36   38.74
  -8   3   0 2613.70   42.33
  -8  -3   1  138.72   15.79
  -8  -3  -1  120.55   20.69
   8   3   1  162.90   18.69
   8   3  -1  135.24   15.64
  -8   3  -1  141.88   17.12
  -8   3   1  139.51   16.50
   8  -3   1  102.20   17.47
   8  -3  -1  115.57   59.68
   8   3  -1  117.38   30.25
   8   3   1  114.45   15.39
   8  -3  -1  112.20   15.36
   8  -3   1  126.22   15.94
  -8   3   1  112.67   13.12
  -8   3  -1  138.33   18.33
   8   3  -2 1099.06   18.60
  -8   3  -2  970.63   20.39
  -8   3   2 1209.81   23.14
   8  -3  -2 1069.63   26.18
   8   3  -2 1024.46   23.64
   8  -3  -2  781.40   18.13
  -8   3   2  877.14   16.24
  -8  -3  -3   45.18    5.25
   8   3  -3   45.20    3.05
  -8   3  -3   44.70    7.31
  -8   3   3   57.40    5.31
   8  -3  -3   55.66    7.26
   8   3  -3   53.28    3.77
   8   3  -3   54.92   24.11
   8  -3  -3   49.35    9.85
   8   3   3   49.47   26.25
  -8   3   3   42.71    7.91
   8  -3   3   60.08    6.16
  -8   3  -4 1163.88   28.17
  -8   3   4 1606.23   27.06
   8   3  -4 1487.43   23.76
   8  -3  -4 1463.95   24.70
   8   3  -4 1524.98   33.30
   8  -3  -4 1494.02   26.01
   8   3   4 1110.76   23.84
  -8   3   4  986.65   17.55
   8  -3   4 1577.56   30.14
  -8  -3  -5   15.83   10.25
   8   3  -5   18.29    1.42
  -8   3  -5   13.13    7.87
  -8   3   5   26.60    8.70
   8   3  -5   16.97    6.31
   8  -3  -5   20.61    7.71
   8  -3  -5   22.80    9.35
   8   3  -5   25.93   18.60
  -8   3   5   19.59    6.44
   8   3   5   19.11   11.98
   8  -3   5   25.60   13.85
  -8  -3  -6  505.84   15.35
  -8   3  -6  507.46   17.23
  -8   3   6  759.07   16.47
   8  -3  -6  656.59   14.31
   8  -3  -6  800.50   19.69
   8   3  -6  752.45   19.57
  -8   3   6  631.56   14.39
   8   3   6  566.29   28.75
   8  -3   6  810.90   22.58
  -8   3   7   37.81    4.19
  -8  -3  -7   36.63   25.97
  -8   3  -7   28.85    4.99
  -8   3   7   53.53    4.34
   8  -3  -7   57.43    9.39
   8   3  -7   57.91    9.23
  -8   3   7   50.00    3.85
   8   3   7   40.60   11.17
   8  -3   7   64.14    9.18
  -8   3   8  813.11   31.26
  -8  -3  -8  724.77   29.72
  -8   3  -8  735.33   30.95
  -8   3   8 1217.71   45.32
   8  -3  -8 1270.66   52.87
   8   3  -8 1172.60   48.06
  -8   3   8 1137.62   42.90
   8   3   8  976.10   39.37
   8  -3   8 1233.54   53.27
  -8  -3  -9   20.44   17.15
  -8   3   9   17.89    5.45
  -8   3  -9   24.51   14.35
  -8   3   9   30.79    9.71
   8  -3  -9   37.22    6.65
   8   3  -9   34.84   22.51
  -8   3   9   31.05    5.66
   8   3   9   36.77   19.88
   8  -3   9   32.20   20.97
  -8  -3 -10  445.57   26.90
  -8   3  10  409.72   15.84
  -8   3 -10  431.50   21.10
  -8   3  10  735.39   27.26
   8  -3 -10  757.41   29.27
   8   3 -10  725.90   32.59
   8   3  10  591.95   29.76
   8  -3  10  737.61   34.52
  -8  -3 -11   19.61   12.70
  -8   3  11   10.87    4.43
  -8   3 -11   20.34   10.77
  -8   3  11   26.66    8.99
   8  -3 -11   24.91    8.14
   8   3 -11   23.73   14.23
   8   3  11   20.14   10.99
   8  -3  11   29.72   10.06
  -8  -3 -12  476.70   28.66
  -8   3 -12  471.92   28.70
  -8   3  12  790.90   42.86
   8  -3 -12  773.43   43.34
   8   3 -12  774.09   48.37
   8   3  12  644.00   37.55
   8  -3  12  803.49   45.76
   8   3 -13    5.18    4.97
  -8  -3 -13    4.72    6.50
  -8   3 -13    7.82    4.24
  -8   3  13   11.55    6.70
   8  -3 -13    8.73    8.56
   8   3 -13   15.62   10.14
   8   3  13   13.21   12.57
   8  -3  13    8.44    9.98
  -8  -3 -14  281.62   34.04
  -8   3 -14  296.17   43.18
  -8   3  14  467.40   51.60
   8  -3 -14  456.69   51.07
   8   3 -14  458.08   52.47
   8   3  14  422.75   51.35
   8  -3  14  479.50   55.57
  -8  -3 -15   -6.24    9.81
  -8   3 -15    5.09    6.22
   8  -3 -15    1.27    5.82
   8   3 -15    1.39    3.88
   8   3  15    4.37    8.42
   8  -3  15   -0.07    6.78
  -8  -3 -16  278.17   36.41
  -8   3 -16  274.00   20.48
   8  -3 -16  434.67   53.27
   8   3 -16  450.44   30.74
   8   3  16  391.01   38.23
   8  -3  16  377.55   52.19
  -8  -3 -17   14.58    9.53
  -8   3 -17   12.52   12.22
   8  -3 -17   17.08   15.20
   8   3 -17   20.27   14.64
   8   3  17   18.82   10.82
   8  -3  17   17.82   10.77
  -8  -3 -18  117.46   17.75
  -8   3 -18   99.42   15.73
   8  -3 -18  173.15   20.65
   8   3 -18  202.64   25.43
   8   3  18  163.68   39.88
   8  -3  18  187.25   26.34
  -8  -3 -19   -0.61    7.46
  -8   3 -19    1.30    3.73
   8   3 -19    0.67    4.83
   8   3  19   -1.26    8.22
   8  -3  19    1.27    7.16
  -8  -3 -20   59.82   30.71
  -8   3 -20   55.73   15.03
   8   3 -20   89.08   26.63
   8   3  20   81.08   15.99
   8  -3  20  106.11   12.20
  -9  -3   0    0.63    2.42
   9   3   0   -0.01    2.65
  -9   3   0   -1.22    3.90
   9  -3   0    3.38    5.03
   9   3   0   -0.51    9.25
   9  -3   0    1.72    2.60
  -9   3   0    0.53    2.83
  -9  -3   1   65.66    4.40
  -9  -3  -1   64.11    7.35
   9   3  -1   66.57    5.90
   9   3   1   74.70    8.51
  -9   3  -1   69.49    9.03
  -9   3   1   65.93    4.82
   9  -3  -1   69.90   14.02
   9   3  -1   57.88    8.35
   9   3   1   61.68    7.38
   9  -3  -1   62.72    5.81
   9  -3   1   59.56    5.54
  -9   3   1   58.30    4.11
  -9  -3  -2    0.91    3.70
   9   3  -2    0.66    1.42
  -9   3  -2    2.51    3.43
  -9   3   2   -0.15    3.26
   9  -3  -2    0.87    3.12
   9   3  -2    0.48    1.44
   9   3  -2   -0.42    6.90
   9  -3  -2   -2.23    4.65
   9   3   2   -3.00    6.25
   9  -3   2   -0.42    4.82
  -9   3   2    0.40    3.64
  -9  -3  -3    0.43    2.94
   9   3  -3    0.49    0.95
  -9   3  -3    1.27    3.33
  -9   3   3    1.04    2.07
   9  -3  -3   -0.13    3.65
   9   3  -3    0.41    1.97
   9   3  -3   -0.01    6.17
   9  -3  -3   -0.58    4.94
   9   3   3   -1.21    5.64
  -9   3   3    1.62    2.82
   9  -3   3    0.93    3.51
  -9  -3  -4   13.17   15.17
   9   3  -4   19.33    3.04
  -9   3  -4   21.24   12.57
  -9   3   4   30.58    9.13
   9   3  -4   25.51    2.90
   9  -3  -4   26.24    7.01
   9   3  -4   26.84   17.15
   9  -3  -4   18.76    4.59
   9   3   4   19.90   11.88
  -9   3   4   18.84    2.91
   9  -3   4   26.83   13.82
  -9  -3  -5   -0.63    6.46
  -9   3  -5    0.99    3.09
   9   3  -5    0.74    0.64
  -9   3   5   -0.50    2.27
   9  -3  -5    0.97    1.66
   9   3  -5    1.25    2.76
   9  -3  -5    1.28    2.71
   9   3   5   -0.59    5.60
  -9   3   5    1.83    2.83
   9  -3   5    0.82    2.33
  -9  -3  -6   72.52    8.16
  -9   3  -6   75.07    9.52
  -9   3   6  101.55    4.61
   9  -3  -6   85.98    3.59
   9  -3  -6   97.12    5.87
   9   3  -6  101.86    8.65
  -9   3   6   80.44    4.23
   9   3   6   68.54    7.55
   9  -3   6  111.44   11.45
  -9  -3  -7    5.36    6.32
  -9   3  -7    4.05    6.34
  -9   3   7    6.76    6.46
   9  -3  -7    5.01    3.50
   9  -3  -7    6.81    4.15
   9   3  -7    4.81    4.46
  -9   3   7    5.06    3.00
   9   3   7    6.47    6.07
   9  -3   7    6.22    3.95
  -9   3   8  261.70   18.47
  -9  -3  -8  222.05   23.09
  -9   3  -8  248.43   20.36
  -9   3   8  379.14   27.49
   9  -3  -8  422.22   30.32
   9   3  -8  387.77   28.59
   9   3   8  304.59   24.08
   9  -3   8  399.15   30.00
  -9  -3  -9    3.72    7.12
  -9   3   9    5.03    3.67
  -9   3  -9    5.66    7.59
  -9   3   9    8.52    5.42
   9  -3  -9   12.73    7.37
   9   3  -9    7.01    4.83
   9   3   9    8.14    8.11
   9  -3   9   12.91    8.00
  -9  -3 -10  298.76   27.40
  -9   3  10  263.36   20.85
  -9   3 -10  282.20   25.53
  -9   3  10  489.20   38.36
   9  -3 -10  459.54   36.90
   9   3 -10  471.39   40.59
   9   3  10  403.19   34.35
   9  -3  10  500.11   45.18
  -9  -3 -11   -1.13    6.78
  -9   3 -11    2.94    2.95
  -9   3  11    2.70    3.01
   9  -3 -11    5.22    3.45
   9   3 -11    1.17    6.00
   9   3  11    3.99    4.87
   9  -3  11   -0.99    8.97
  -9  -3 -12  188.16   20.97
  -9   3 -12  201.40   23.34
  -9   3  12  303.83   29.21
   9  -3 -12  298.78   29.76
   9   3 -12  288.37   29.43
   9   3  12  231.69   26.27
   9  -3  12  307.37   33.04
  -9  -3 -13    3.40    6.16
  -9   3 -13    4.89    5.02
  -9   3  13    3.85    2.99
   9  -3 -13    5.21    4.15
   9   3 -13    7.93    6.97
   9   3  13    9.95    7.86
   9  -3  13    3.29    8.89
  -9  -3 -14  156.65   32.76
  -9   3 -14  162.72   28.59
   9  -3 -14  259.08   31.78
   9   3 -14  268.83   33.96
   9   3  14  243.14   40.99
   9  -3  14  257.12   43.53
  -9  -3 -15   25.03   20.26
  -9   3 -15   25.62   19.66
   9  -3 -15   37.31   15.62
   9   3 -15   31.63   24.65
   9   3  15   31.82   18.23
   9  -3  15   40.41   19.71
  -9  -3 -16  271.70   25.15
  -9   3 -16  275.07   24.82
   9  -3 -16  419.77   34.43
   9   3 -16  437.83   36.08
   9   3  16  360.94   43.16
   9  -3  16  423.86   39.38
  -9  -3 -17    3.89    7.24
  -9   3 -17   -6.35    7.92
   9  -3 -17    1.36    5.88
   9   3 -17   -0.12    5.87
   9   3  17   -0.58    6.93
   9  -3  17   -3.14   11.59
  -9  -3 -18  167.90   25.77
  -9   3 -18  172.31   21.26
   9  -3 -18  259.46   29.82
   9   3 -18  302.17   35.94
   9   3  18  254.27   31.19
   9  -3  18  250.42   31.81
  -9  -3 -19    1.19    4.50
  -9   3 -19   -1.43    7.22
   9   3 -19    3.48   10.65
   9   3  19   -4.82    9.01
   9  -3  19   -3.00   11.29
  -9  -3 -20  238.89   31.45
  -9   3 -20  222.81   28.78
   9   3 -20  339.87   41.30
   9   3  20  308.99   38.32
   9  -3  20  360.48   45.50
  10   3   0  768.09   17.47
  10   3   0  752.91   20.52
  10  -3   0  746.83   18.85
 -10  -3   1   18.16    6.52
 -10  -3  -1   15.90   10.88
  10   3  -1   14.79    5.02
 -10   3  -1   19.68   13.00
 -10   3   1   15.94   12.27
  10  -3  -1   14.52    5.77
  10   3  -1   15.08    9.97
  10   3   1   25.24   17.90
  10  -3  -1   22.16   16.49
  10  -3   1   21.29   13.67
 -10  -3  -2 1644.33   34.52
  10   3  -2 1518.39   30.03
 -10   3  -2 1626.66   34.75
 -10   3   2 1897.83   38.52
  10  -3  -2 1720.79   34.54
  10   3  -2 1819.96   35.86
  10   3  -2 1559.01   34.01
  10  -3  -2 1572.06   36.59
  10   3   2 1737.68   38.61
  10  -3   2 1784.53   37.63
 -10   3   2 1659.23   33.58
 -10  -3  -3   81.65   10.77
  10   3  -3   77.83    6.28
 -10   3  -3   80.30    9.27
 -10   3   3   92.08   10.86
  10  -3  -3   89.24    8.28
  10   3  -3   97.00    7.93
  10   3  -3   88.16   10.11
  10  -3  -3   68.97    7.29
  10   3   3   85.83    9.95
  10  -3   3   98.93   10.20
 -10   3   3   81.54    7.27
 -10  -3  -4  690.65   18.34
 -10   3  -4  730.42   19.80
  10   3  -4  736.59   14.74
 -10   3   4  940.77   20.25
  10  -3  -4  844.36   18.33
  10   3  -4  883.40   17.56
  10  -3  -4  811.53   19.17
  10   3  -4  871.10   29.47
 -10   3   4  750.25   19.89
 -10  -3  -5   69.06   13.64
 -10   3  -5   63.92    8.96
  10   3  -5   67.50    1.53
 -10   3   5   81.10    8.96
  10   3  -5   80.87    9.29
  10  -3  -5   80.71    6.35
  10   3   5   54.68    8.29
 -10   3   5   54.61    5.53
  10  -3   5   83.93   11.83
 -10  -3  -6 1732.16   65.76
 -10   3  -6 1821.48   71.88
 -10   3   6 2502.21   91.47
  10  -3  -6 2072.99   75.83
  10  -3  -6 2557.04   94.53
  10   3  -6 2382.32   89.63
  10   3   6 1882.49   72.86
  10  -3   6 2611.86   97.87
 -10  -3  -7    5.54    7.30
 -10   3  -7    9.56    7.16
 -10   3   7   12.12    7.72
  10  -3  -7    9.11    6.66
  10  -3  -7   15.11    8.52
  10   3  -7   12.64    7.87
  10   3   7   12.74    5.37
  10  -3   7   16.71    9.64
 -10  -3  -8  679.75   35.07
 -10   3  -8  790.39   33.44
 -10   3   8 1101.82   39.27
  10  -3  -8 1179.08   48.50
  10   3  -8 1101.48   49.44
  10   3   8  877.43   40.54
  10  -3   8 1138.92   45.66
 -10  -3  -9   -3.00    7.81
 -10   3   9    0.51    0.98
 -10   3  -9   -0.13    7.34
 -10   3   9    2.53    2.20
  10  -3  -9   -1.33    4.04
  10   3  -9    0.66    3.49
  10   3   9    3.89    5.66
  10  -3   9    3.09    5.71
 -10  -3 -10  929.15   52.25
 -10   3 -10 1113.18   65.95
 -10   3  10 1436.63   74.66
  10  -3 -10 1489.91   80.46
  10   3 -10 1500.85   80.96
  10   3  10 1247.96   71.51
  10  -3  10 1519.30   82.06
 -10  -3 -11   47.44   11.69
 -10   3 -11   59.03   16.96
 -10   3  11   76.76    5.57
  10  -3 -11   80.38   12.76
  10   3 -11   73.79   14.11
  10   3  11   68.53   27.42
  10  -3  11   81.22   31.97
 -10  -3 -12  455.39   31.60
 -10   3 -12  483.65   33.77
  10  -3 -12  679.90   75.02
  10   3 -12  675.78   29.02
  10   3  12  559.02   53.89
  10  -3  12  689.64   25.79
 -10  -3 -13    0.90    2.68
 -10   3 -13    3.42    6.83
  10  -3 -13   -0.20    4.55
  10   3 -13    3.53    6.87
  10   3  13    4.25    6.71
  10  -3  13    1.16    3.78
 -10  -3 -14  326.26   38.25
 -10   3 -14  331.47   18.58
  10  -3 -14  464.91   51.30
  10   3 -14  500.84   57.19
  10   3  14  446.81   52.06
  10  -3  14  513.04   58.50
 -10  -3 -15   24.74   14.35
 -10   3 -15   21.16   12.41
  10  -3 -15   22.48   18.77
  10   3 -15   22.53   16.31
  10   3  15   23.92   10.92
  10  -3  15   24.65   21.69
 -10  -3 -16  167.31   29.13
 -10   3 -16  179.72   26.39
  10  -3 -16  256.41   33.28
  10   3 -16  274.97   37.60
  10   3  16  235.47   32.96
  10  -3  16  258.82   48.07
 -10  -3 -17    5.56    7.15
 -10   3 -17    6.50    8.79
  10  -3 -17    5.33    6.16
  10   3 -17    6.92    5.28
  10   3  17    5.21    9.46
  10  -3  17    5.17    6.52
 -10  -3 -18  135.38   38.05
 -10   3 -18  152.50   33.59
  10   3 -18  241.02   29.46
  10   3  18  219.52   55.28
  10  -3  18  253.39   32.87
 -10  -3 -19   33.38   15.12
 -10   3 -19   25.65   23.65
  10   3 -19   34.28   26.37
  10   3  19   38.62   22.50
  10  -3  19   43.76   40.76
 -11  -3   0   -0.21    4.04
  11   3   0    0.01    1.66
 -11   3   0   -1.51    4.15
  11   3   0   -2.17    6.98
  11  -3   0   -0.98    4.59
 -11  -3   1   49.80    4.19
 -11  -3  -1   44.90    8.27
  11   3  -1   47.53    3.28
 -11   3  -1   49.37    9.08
 -11   3   1   49.04    9.98
  11   3  -1   47.61    8.86
  11  -3  -1   41.59    8.24
  11   3   1   49.30   18.96
  11  -3   1   39.83   14.24
 -11  -3  -2   27.56   26.37
 -11   3  -2   31.03    7.73
  11   3  -2   26.22    2.60
 -11   3   2   35.23    5.56
  11  -3  -2   35.95   14.18
  11   3  -2   31.32    5.13
  11   3  -2   35.66   20.78
  11  -3  -2   35.81    6.43
  11   3   2   42.18   25.52
  11  -3   2   29.45   16.74
 -11  -3  -3   19.18   12.95
 -11   3  -3   16.66   10.20
  11   3  -3   15.05    4.32
 -11   3   3   21.66    6.29
  11  -3  -3   21.62   11.83
  11   3  -3   19.63    5.94
  11   3  -3   20.41   14.16
  11  -3  -3   18.16   13.78
  11   3   3   26.63   20.88
  11  -3   3   18.14   10.07
 -11  -3  -4   88.07   19.30
 -11   3  -4   83.27   12.62
  11   3  -4   86.39    3.06
 -11   3   4   95.92    5.09
  11  -3  -4   83.26    4.62
  11   3  -4   96.15    3.13
  11   3  -4   87.64   15.33
  11  -3  -4   79.24    7.90
  11   3   4   83.56   17.59
  11  -3   4  102.47    8.35
 -11  -3  -5   90.31   10.15
 -11   3  -5  114.15   23.02
 -11   3   5  123.82   10.17
  11  -3  -5  107.25    8.33
  11  -3  -5  115.97   10.82
  11   3  -5  106.00   12.30
  11   3   5  100.78   15.92
  11  -3   5  127.56   12.29
 -11  -3  -6  120.66   92.16
 -11   3  -6  171.63   16.66
 -11   3   6  198.72   15.40
  11  -3  -6  179.30   13.09
  11   3  -6  200.10   17.42
  11  -3  -6  211.08   22.51
  11   3   6  149.53   17.12
  11  -3   6  209.39   27.97
 -11  -3  -7   29.65   16.42
 -11   3  -7   20.27    9.33
 -11   3   7   27.45    7.88
  11  -3  -7   20.47    3.51
  11  -3  -7   27.09   11.76
  11   3  -7   29.83   17.70
  11   3   7   23.43   14.29
  11  -3   7   33.98   17.51
 -11   3   8  104.70   10.60
 -11  -3  -8  110.68   23.56
 -11   3  -8  128.02   27.04
 -11   3   8  154.76   15.25
  11  -3  -8  161.80   17.04
  11   3  -8  163.47   18.54
  11   3   8  123.76   15.77
  11  -3   8  180.86   18.25
 -11  -3  -9   18.69   12.47
 -11   3  -9   22.40   11.59
 -11   3   9   19.42    5.48
  11  -3  -9   25.03    9.06
  11   3  -9   22.19   11.75
  11   3   9   20.91   14.65
  11  -3   9   22.11   17.15
 -11  -3 -10  391.67   28.86
 -11   3 -10  386.71   26.96
  11  -3 -10  569.85   15.12
  11   3 -10  546.20   21.11
  11   3  10  451.23   17.90
  11  -3  10  550.56   36.43
 -11  -3 -11   10.05   13.04
 -11   3 -11   11.09    8.18
  11  -3 -11   18.52   11.14
  11   3 -11   22.96   14.03
  11   3  11   17.15    8.98
  11  -3  11   19.32   12.06
 -11  -3 -12  175.17   23.05
 -11   3 -12  187.29   39.27
  11  -3 -12  238.87   29.03
  11   3 -12  238.97   29.87
  11   3  12  211.76   29.90
  11  -3  12  255.32   35.31
 -11  -3 -13   28.16   22.03
 -11   3 -13   47.92   26.46
  11  -3 -13   55.88   11.90
  11   3 -13   60.32    9.94
  11   3  13   52.32   24.36
  11  -3  13   64.63   35.20
 -11  -3 -14  337.25   25.64
 -11   3 -14  320.57   39.18
  11  -3 -14  492.76   30.89
  11   3 -14  477.80   42.48
  11   3  14  420.03   49.26
  11  -3  14  510.98   40.95
 -11  -3 -15    5.36    6.68
 -11   3 -15    7.20    7.45
  11  -3 -15    6.16    6.56
  11   3 -15    5.93    8.01
  11   3  15    5.38    5.86
  11  -3  15    7.69    9.11
 -11  -3 -16  249.09   41.17
 -11   3 -16  269.86   41.42
  11  -3 -16  368.61   46.10
  11   3 -16  359.44   51.90
  11   3  16  348.00   19.10
  11  -3  16  380.03   56.57
 -11  -3 -17    2.05    6.74
 -11   3 -17    4.07    7.72
  11   3 -17    2.51    5.49
  11   3  17    2.73    6.59
  11  -3  17    5.28    7.12
 -11  -3 -18  287.17   30.59
 -11   3 -18  286.12   31.78
  11   3 -18  393.32   48.97
  11   3  18  392.39   39.12
  11  -3  18  433.99   44.26
 -11  -3 -19    5.37    8.36
 -11   3 -19    3.42    6.36
  11   3 -19    1.30    4.41
  11   3  19   -2.48    8.72
  11  -3  19   -3.12   10.24
 -12   3   0 1688.42   66.02
  12   3   0 1983.33   25.84
  12  -3   0 1919.52   72.81
 -12  -3   1   28.22    7.17
 -12  -3  -1   25.07    6.21
  12   3  -1   19.93    5.01
 -12   3  -1   20.75   14.08
 -12   3   1   23.51    6.72
  12   3  -1   22.47   11.97
  12   3   1   27.48   13.83
  12  -3  -1   26.23   18.70
  12  -3   1   23.09   13.64
 -12  -3  -2 1103.71   45.21
 -12   3  -2 1108.01   41.72
  12   3  -2 1090.84   39.27
 -12   3   2 1151.17   42.61
  12   3  -2 1054.62   40.66
  12  -3  -2 1137.25   52.35
  12   3   2 1219.80   47.46
  12  -3   2 1078.81   40.87
 -12  -3  -3    8.02    5.26
 -12   3  -3    9.22    7.99
 -12   3   3    6.35    4.54
  12   3  -3    5.86    4.35
  12  -3  -3    4.14    3.13
  12   3  -3    9.13    3.45
  12   3  -3    7.83    5.67
  12  -3  -3    3.84    7.47
  12   3   3   10.29    9.45
  12  -3   3    6.86    5.34
 -12  -3  -4 1602.85   62.79
 -12   3  -4 1672.59   70.63
 -12   3   4 1882.01   66.69
  12   3  -4 1895.71   66.24
  12  -3  -4 1643.01   58.35
  12   3  -4 1784.42   62.44
  12   3  -4 1690.15   72.55
  12  -3  -4 1570.54   58.94
  12   3   4 1781.43   67.80
  12  -3   4 2003.99   74.82
 -12  -3  -5  111.89   18.01
 -12   3  -5  106.08   15.70
 -12   3   5  125.13   15.79
  12   3  -5   73.09    7.06
  12  -3  -5  117.69   12.36
  12  -3  -5  119.73   19.11
  12   3  -5  130.61   15.65
  12   3   5  122.61   16.06
  12  -3   5  132.14   19.07
 -12  -3  -6 1227.78   51.20
 -12   3  -6 1186.22   50.04
 -12   3   6 1142.64   45.16
  12  -3  -6 1128.53   44.44
  12   3  -6 1271.79   53.12
  12  -3  -6 1338.90   54.01
  12   3   6 1140.42   52.86
  12  -3   6 1520.76   62.38
 -12  -3  -7    3.99    8.01
 -12   3  -7   11.58    8.83
 -12   3   7    9.41    6.13
  12  -3  -7    5.64    2.92
  12   3  -7   10.89    8.05
  12  -3  -7   12.79    8.75
  12   3   7    8.37    3.06
  12  -3   7   10.29    5.88
 -12  -3  -8 1286.13   69.69
 -12   3  -8 1377.25   74.21
 -12   3   8 1454.35   75.47
  12  -3  -8 1732.63   92.38
  12   3  -8 1663.30   89.01
  12   3   8 1292.56   72.14
  12  -3   8 1717.35   92.25
 -12  -3  -9   12.20    9.14
 -12   3  -9   11.66    7.89
  12  -3  -9   18.06   10.92
  12   3  -9   17.17   10.38
  12   3   9   12.45    8.33
  12  -3   9   16.59   11.40
 -12  -3 -10  734.67   48.71
 -12   3 -10  736.73   53.72
  12  -3 -10 1064.72   63.11
  12   3 -10  989.35   60.89
  12   3  10  828.83   50.97
  12  -3  10 1027.42   65.32
 -12  -3 -11    2.54    9.98
 -12   3 -11   -0.33    8.89
  12  -3 -11    2.11    2.40
  12   3 -11    5.20    5.84
  12   3  11    0.87    6.73
  12  -3  11    4.45    4.22
 -12  -3 -12  744.90   49.99
 -12   3 -12  789.61   52.33
  12  -3 -12 1025.08   67.79
  12   3 -12 1014.73   68.98
  12   3  12  852.23   59.83
  12  -3  12 1099.19   74.50
 -12  -3 -13   41.71   23.54
 -12   3 -13   42.90   24.84
  12  -3 -13   60.24    8.68
  12   3 -13   67.04   12.72
  12   3  13   67.65   22.83
  12  -3  13   67.53   41.78
 -12  -3 -14  191.94   27.29
 -12   3 -14  218.03   36.61
  12  -3 -14  281.46   36.11
  12   3 -14  304.79   42.03
  12   3  14  248.19   34.68
  12  -3  14  291.68   39.85
 -12  -3 -15    8.13    7.76
 -12   3 -15    4.67    8.46
  12  -3 -15   10.00    6.12
  12   3 -15   11.71    7.47
  12   3  15   15.32   12.12
  12  -3  15   11.33    8.47
 -12  -3 -16  332.23   32.09
 -12   3 -16  352.30   34.13
  12   3 -16  428.34   52.74
  12   3  16  402.27   38.74
  12  -3  16  493.18   46.18
 -12  -3 -17   24.61   15.65
 -12   3 -17   30.79   23.71
  12   3 -17   30.34   32.31
  12   3  17   32.39   24.51
  12  -3  17   33.42   27.78
 -12  -3 -18  145.48   26.11
 -12   3 -18  149.22   28.85
  12   3 -18  189.30   33.38
  12   3  18  175.66   47.22
  12  -3  18  238.59   42.54
 -13  -3   0   -4.14    4.83
 -13   3   0    1.85    2.67
  13  -3   0    4.43    6.34
 -13  -3   1   86.76   10.66
 -13  -3  -1   82.24   18.16
 -13   3  -1   90.31   18.27
 -13   3   1   80.40   17.04
  13   3  -1   87.09   14.31
  13  -3  -1   91.40   12.50
  13   3   1   88.75   17.90
  13  -3   1   92.30   12.39
 -13  -3  -2    5.86    3.40
 -13   3  -2    8.58    6.00
 -13   3   2    7.15    4.80
  13   3  -2    7.14    4.88
  13   3  -2    5.74    7.98
  13  -3  -2    9.03    6.05
  13   3   2   12.52   11.98
  13  -3   2   10.15    5.27
 -13  -3  -3   14.33   11.77
 -13   3  -3   14.70    9.93
 -13   3   3   12.24   10.88
  13   3  -3   11.10    7.76
  13   3  -3   10.24    5.41
  13   3  -3   16.03    8.32
  13  -3  -3   10.37    9.45
  13   3   3   18.99   13.83
  13  -3   3   10.65    8.91
 -13  -3  -4    5.17    6.87
 -13   3  -4    9.35    6.08
 -13   3   4    5.84    4.89
  13   3  -4    6.52    3.78
  13   3  -4    4.59    4.90
  13  -3  -4    3.79    3.86
  13   3   4    4.74    6.49
  13  -3   4    8.07    4.12
 -13  -3  -5   -0.12    5.89
 -13   3  -5   -0.37    6.04
 -13   3   5    2.15    1.79
  13  -3  -5    2.51    2.22
  13   3  -5    0.44    5.22
  13   3   5    2.23    5.19
  13  -3   5    2.23    3.92
 -13  -3  -6   73.01   15.12
 -13   3  -6   86.05   14.14
 -13   3   6   83.54    9.26
  13  -3  -6   89.91    8.15
  13   3  -6   89.89   11.86
  13   3   6   89.38   21.81
  13  -3   6   97.81   14.75
 -13  -3  -7    7.33    8.14
 -13   3  -7    5.86    4.34
 -13   3   7    4.88    2.90
  13   3  -7    4.45    6.09
  13  -3  -7    5.90    4.68
  13   3   7    2.97    4.39
  13  -3   7    5.76    4.46
 -13  -3  -8  171.69   28.31
 -13   3  -8  161.54   36.19
  13  -3  -8  192.46   19.57
  13   3  -8  183.36   30.30
  13   3   8  140.96   12.45
  13  -3   8  216.93   24.08
 -13  -3  -9    2.44    6.66
 -13   3  -9    1.52    2.17
  13  -3  -9    2.11    4.14
  13   3  -9    3.40    5.80
  13   3   9    2.51    5.50
  13  -3   9    2.76    4.27
 -13  -3 -10  336.07   23.11
 -13   3 -10  329.27   23.35
  13  -3 -10  408.48   23.34
  13   3 -10  389.16   36.59
  13   3  10  342.74   23.99
  13  -3  10  376.63   29.20
 -13  -3 -11   24.37   14.79
 -13   3 -11   37.52   21.27
  13  -3 -11   43.08    7.52
  13   3 -11   36.98   25.09
  13   3  11   31.76   24.53
  13  -3  11   31.90   22.02
 -13  -3 -12  455.22   33.49
 -13   3 -12  491.62   33.24
  13  -3 -12  679.64   43.68
  13   3 -12  636.13   48.50
  13   3  12  560.24   39.35
  13  -3  12  693.17   46.67
 -13  -3 -13   25.74   15.38
 -13   3 -13   14.88    9.15
  13  -3 -13   19.95   12.46
  13   3 -13   24.64   18.42
  13   3  13   26.08   17.88
  13  -3  13   28.14   12.69
 -13  -3 -14  513.37   57.17
 -13   3 -14  479.75   38.94
  13  -3 -14  619.94   45.60
  13   3 -14  630.85   51.43
  13   3  14  527.44   41.99
  13  -3  14  662.98   54.36
 -13  -3 -15   26.20   18.79
 -13   3 -15   28.84   16.52
  13   3 -15   35.99   27.93
  13   3  15   26.63   15.85
  13  -3  15   40.20   22.86
 -13  -3 -16  347.74   56.55
 -13   3 -16  348.64   49.47
  13   3 -16  477.66   47.23
  13   3  16  408.92   41.86
  13  -3  16  491.36   48.77
 -13  -3 -17    1.60    7.63
 -13   3 -17   -1.39    9.07
  13   3 -17    2.85    3.65
  13   3  17    4.75    8.39
  13  -3  17   -2.76    9.78
 -14  -3   0  879.89   48.60
 -14   3   0  858.49   48.37
  14   3   0  967.59   55.91
  14  -3   0  952.44   57.09
 -14  -3   1   19.69    7.79
 -14  -3  -1   20.47   10.72
 -14   3   1   16.80   11.99
 -14   3  -1   16.89   11.07
  14   3  -1   24.78   26.66
  14   3   1   25.01   23.33
  14  -3  -1   24.95   16.55
  14  -3   1   21.84   17.31
 -14  -3  -2 1934.91  104.63
 -14   3  -2 1831.62   99.27
 -14   3   2 1820.02   18.91
  14   3  -2 1885.88  111.19
  14  -3  -2 2071.86  114.51
  14   3   2 2196.70   30.93
  14  -3   2 1916.78   33.81
 -14  -3  -3  109.36   26.91
 -14   3  -3   96.05   22.37
 -14   3   3   93.12   11.23
  14   3  -3   98.13   10.62
  14   3  -3  110.77   29.68
  14  -3  -3  114.36   16.59
  14   3   3  114.97   15.39
  14  -3   3  101.74   12.57
 -14  -3  -4 1166.78   63.88
 -14   3  -4 1109.49   62.21
 -14   3   4 1056.73   55.72
  14   3  -4 1067.50   55.98
  14   3  -4 1012.52   57.01
  14  -3  -4  982.56   53.48
  14   3   4 1172.65   70.07
  14  -3   4 1069.53   65.97
 -14  -3  -5   23.97   11.89
 -14   3  -5   17.70   13.77
 -14   3   5    3.44    3.81
  14   3  -5   21.18   13.37
  14  -3  -5   17.96   11.42
  14   3   5   24.24   16.62
  14  -3   5   21.25   15.72
 -14  -3  -6 2253.92   54.39
 -14   3  -6 2276.09   28.45
 -14   3   6 1999.94   14.23
  14  -3  -6 2022.91  121.20
  14   3  -6 2019.04  120.34
  14   3   6 2181.60   32.45
  14  -3   6 2290.77  141.93
 -14  -3  -7   43.58   23.18
 -14   3  -7   60.06   14.33
  14  -3  -7   52.26    9.64
  14   3  -7   52.71   18.65
  14   3   7   49.11   36.01
  14  -3   7   49.35   35.61
 -14  -3  -8 1149.48   68.90
 -14   3  -8 1210.12   82.97
  14  -3  -8 1359.09   78.50
  14   3  -8 1282.89   76.26
  14   3   8 1111.52   79.05
  14  -3   8 1404.40   87.76
 -14  -3  -9   47.35   37.21
 -14   3  -9   62.05   15.04
  14  -3  -9   84.71   12.32
  14   3  -9   67.37   24.80
  14   3   9   50.24   17.56
  14  -3   9   68.96   41.38
 -14  -3 -10  994.37   67.20
 -14   3 -10 1075.16   72.11
  14  -3 -10 1248.46   77.98
  14   3 -10 1220.48   77.98
  14   3  10 1028.37   70.35
  14  -3  10 1339.73   85.38
 -14  -3 -11   -1.19    7.80
 -14   3 -11   -1.17    8.47
  14  -3 -11    2.13    3.81
  14   3 -11   -2.66    7.46
  14   3  11   -1.92    9.90
  14  -3  11    1.94    4.92
 -14  -3 -12  333.59   29.33
 -14   3 -12  345.96   30.67
  14  -3 -12  380.70   29.83
  14   3 -12  370.85   34.01
  14   3  12  310.51   44.16
  14  -3  12  398.67   32.90
 -14  -3 -13   -0.18    9.31
 -14   3 -13    2.40    5.58
  14  -3 -13    2.04    4.43
  14   3 -13    1.42    5.47
  14   3  13    4.16    4.63
  14  -3  13    2.41    4.59
 -14  -3 -14  294.57   42.56
 -14   3 -14  329.33   42.07
  14   3 -14  390.15   41.34
  14   3  14  323.45   35.13
  14  -3  14  388.06   33.21
 -14  -3 -15    5.24    6.32
 -14   3 -15    4.92    6.06
  14   3 -15   12.63   12.82
  14   3  15    4.16    8.94
  14  -3  15    9.19   15.06
 -14  -3 -16  255.86   34.48
 -14   3 -16  275.57   21.28
  14   3 -16  306.23   42.68
  14   3  16  244.65   41.37
  14  -3  16  315.00   41.90
 -15  -3   0    0.87    2.77
 -15   3   0   -2.49    4.70
  15   3   0   -5.03    9.49
  15  -3   0    1.90    5.52
 -15  -3   1  110.25    9.50
 -15  -3  -1  107.72    9.98
 -15   3   1  108.75   21.87
 -15   3  -1  115.44   18.37
  15   3  -1  112.01   13.06
  15  -3  -1  121.32   11.60
  15   3   1  121.68   12.32
  15  -3   1  113.93   11.18
 -15   3   2   -0.66    4.63
 -15   3  -2    1.03    2.76
  15   3  -2    0.99    0.96
  15   3  -2    1.11    6.45
  15  -3  -2    0.24    3.20
  15   3   2    0.42    3.51
  15  -3   2    2.12    2.94
 -15  -3  -3    1.67    2.25
 -15   3   3    0.15    2.42
 -15   3  -3    1.16    5.99
  15   3  -3   -0.37    2.20
  15   3  -3    2.39    5.06
  15  -3  -3    3.86    5.13
  15   3   3    1.94    4.44
  15  -3   3    1.83    3.45
 -15  -3  -4    3.45    6.54
 -15   3  -4    8.23    5.47
 -15   3   4    2.35    2.16
  15   3  -4    3.13    2.37
  15   3  -4    2.49    5.74
  15  -3  -4    1.22    2.70
  15   3   4   -5.76    8.22
  15  -3   4    1.85    6.90
 -15  -3  -5    0.87    3.20
 -15   3  -5    1.12    3.19
  15   3  -5   -1.01    7.18
  15  -3  -5    1.85    3.63
  15   3   5    3.29    4.39
  15  -3   5    3.71    6.08
 -15  -3  -6  156.19   31.96
 -15   3  -6  134.74   28.69
  15  -3  -6  104.69   66.38
  15   3  -6  105.04   54.12
  15   3   6  130.25   25.16
  15  -3   6  140.28   19.42
 -15  -3  -7    1.27    5.71
 -15   3  -7    9.07    6.09
  15  -3  -7    2.42    5.07
  15   3  -7    6.30    5.45
  15   3   7    1.23    7.75
  15  -3   7   11.85    8.08
 -15  -3  -8  205.17   25.83
 -15   3  -8  192.83   24.77
  15  -3  -8  189.83   28.89
  15   3  -8  168.67   23.34
  15   3   8  179.69   25.00
  15  -3   8  222.68   27.72
 -15  -3  -9   -3.61    6.91
  15  -3  -9    3.15    6.96
  15   3  -9    3.71    4.35
  15   3   9    7.02    8.81
  15  -3   9    4.91    7.16
 -15  -3 -10  545.95   38.38
 -15   3 -10  483.79   32.98
  15  -3 -10  571.77   35.04
  15   3 -10  552.71   36.37
  15   3  10  394.36   32.31
  15  -3  10  589.08   38.76
 -15  -3 -11    1.91    6.29
 -15   3 -11   14.75   26.89
  15  -3 -11    0.85    2.21
  15   3 -11    2.58    4.26
  15   3  11    2.29    4.89
  15  -3  11    1.26    5.48
 -15  -3 -12  546.58   47.44
 -15   3 -12  463.93   37.53
  15  -3 -12  491.66   36.77
  15   3 -12  458.40   39.94
  15   3  12  410.46   36.35
  15  -3  12  497.95   39.14
 -15  -3 -13   30.78   25.86
 -15   3 -13   25.66   20.71
  15   3 -13   32.14   24.29
  15   3  13   26.90   19.30
  15  -3  13   36.74   24.11
 -15  -3 -14  540.91   54.71
 -15   3 -14  540.75   53.00
  15   3 -14  593.78   57.45
  15   3  14  479.66   47.52
  15  -3  14  644.09   64.59
 -15  -3 -15   16.79   21.08
 -15   3 -15   22.60   26.71
  15   3 -15   22.81   19.94
  15   3  15   12.80   12.32
  15  -3  15   19.60   12.34
 -15  -3 -16  252.54   32.37
 -15   3 -16  274.63   35.75
  15   3 -16  299.25   38.74
  15   3  16  244.63   31.84
  15  -3  16  353.82   46.08
 -16  -3   0 1406.41   82.61
 -16   3   0 1489.15   89.97
  16   3   0 1699.70   99.81
  16  -3   0 1653.61   99.78
 -16  -3   1   23.37    8.34
 -16  -3  -1   32.31   18.73
 -16   3   1   24.05   12.71
 -16   3  -1   23.62   13.57
  16   3  -1   29.13   22.31
  16  -3  -1   25.55   24.32
  16   3   1   33.05   22.85
  16  -3   1   33.01   19.10
 -16  -3  -2 1254.54   67.80
 -16   3   2 1248.80   67.15
 -16   3  -2 1166.31   63.32
  16   3  -2 1252.39   64.22
  16   3  -2 1249.51   66.86
  16  -3  -2 1300.35   72.22
  16   3   2 1374.58   76.13
  16  -3   2 1246.85   66.29
 -16  -3  -3   -0.32    5.73
 -16   3   3    1.94    2.34
 -16   3  -3    2.54    5.82
  16   3  -3    2.10    7.85
  16  -3  -3    2.86    3.69
  16   3   3    4.17    5.76
  16  -3   3    6.84    7.77
 -16  -3  -4 1681.58   92.45
 -16   3  -4 1596.81   83.85
  16  -3  -4 1592.17   82.58
  16   3  -4 1584.76   93.89
  16   3   4 1819.05   95.72
  16  -3   4 1665.37   90.08
 -16  -3  -5   28.44   16.10
 -16   3  -5   23.18   21.89
  16   3  -5   26.26   16.34
  16  -3  -5   20.88   15.39
  16   3   5   31.20   20.04
  16  -3   5   23.11   15.06
 -16  -3  -6 1376.22   88.17
 -16   3  -6 1301.37   82.57
  16  -3  -6 1045.04   66.84
  16   3  -6 1050.79   71.30
  16   3   6 1330.49   93.29
  16  -3   6 1179.31   81.31
 -16  -3  -7    0.14    4.30
 -16   3  -7    5.88    8.52
  16  -3  -7    4.01    5.17
  16   3  -7   -1.39    6.42
  16   3   7   -0.33    9.08
  16  -3   7    2.01    5.81
 -16  -3  -8 1680.85   27.98
 -16   3  -8 1726.35   55.04
  16   3  -8 1384.99   86.35
  16   3   8 1587.30   40.89
  16  -3   8 1666.65   50.84
 -16  -3  -9   14.47   14.83
 -16   3  -9   13.40    7.47
  16  -3  -9   10.09    9.98
  16   3  -9   13.04   11.40
  16   3   9    4.83    6.39
  16  -3   9   16.44   15.70
 -16  -3 -10  782.53   62.06
 -16   3 -10  745.91   56.88
  16  -3 -10  746.05   54.30
  16   3 -10  688.63   52.43
  16   3  10  672.21   51.83
  16  -3  10  804.25   61.84
 -16  -3 -11   10.64    7.75
 -16   3 -11   12.23   10.01
  16  -3 -11   12.85    9.53
  16   3 -11   12.80   11.47
  16   3  11   14.95   15.41
  16  -3  11   16.37    8.19
 -16  -3 -12  734.45   62.65
 -16   3 -12  725.30   62.23
  16   3 -12  707.33   62.01
  16   3  12  625.88   62.11
  16  -3  12  772.92   65.58
 -16  -3 -13   -0.17    5.80
 -16   3 -13    3.76    6.18
  16   3 -13    7.99    7.68
  16   3  13   -0.04    7.50
 -16  -3 -14  374.34   31.48
 -16   3 -14  353.17   30.41
  16   3 -14  355.39   29.67
  16   3  14  329.01   30.85
  16  -3  14  421.28   37.22
 -17  -3   0   -1.19    3.25
 -17   3   0    0.32    4.72
  17   3   0    5.03    6.31
  17  -3   0    5.02    8.80
 -17  -3  -1   11.36    7.88
 -17   3   1    8.35    7.11
 -17   3  -1    8.40    5.44
  17   3  -1   12.38    9.01
  17   3   1   16.82   14.05
  17  -3  -1   12.70    8.47
  17  -3   1   10.79    7.83
 -17  -3  -2   43.44   13.23
 -17   3  -2   40.86   12.30
 -17   3   2   42.14   16.87
  17   3  -2   47.37   32.87
  17  -3  -2   42.09   19.57
  17  -3   2   37.75   27.92
 -17  -3  -3    3.70    6.04
 -17   3  -3    0.30    3.07
  17  -3  -3    0.92    2.87
  17   3  -3    2.81    4.88
  17   3   3    5.96    5.79
  17  -3   3    8.07    9.97
 -17  -3  -4   49.45   14.28
 -17   3  -4   52.39    8.91
  17  -3  -4   48.92   19.44
  17   3  -4   46.04   13.61
  17   3   4   60.21   16.52
  17  -3   4   43.72   23.22
 -17  -3  -5    3.05    3.96
 -17   3  -5    2.56    6.33
  17  -3  -5    0.57    4.99
  17   3  -5   -1.74    7.44
  17   3   5   -0.12    7.67
  17  -3   5    2.52    5.25
 -17  -3  -6  119.16   18.93
 -17   3  -6  111.91   31.55
  17  -3  -6   77.00    8.29
  17   3  -6   90.88   11.76
  17   3   6  107.96   18.51
  17  -3   6   96.53   14.77
 -17  -3  -7   22.00   20.89
 -17   3  -7   15.66   11.13
  17  -3  -7   12.76   13.09
  17   3  -7   14.80    8.60
  17   3   7   18.96   14.12
  17  -3   7   15.70    8.88
 -17  -3  -8  240.47   33.66
 -17   3  -8  241.12   35.42
  17  -3  -8  171.52   21.53
  17   3  -8  161.24   22.03
  17   3   8  207.76   28.09
  17  -3   8  194.21   30.69
 -17  -3  -9    3.12    5.38
 -17   3  -9    1.52    7.98
  17  -3  -9   -0.72    4.18
  17   3  -9    2.99    4.23
  17   3   9    5.22    6.28
  17  -3   9    0.09    6.59
 -17  -3 -10  274.10   49.34
 -17   3 -10  225.27   31.70
  17   3 -10  220.45   27.03
  17   3  10  245.43   16.66
  17  -3  10  244.24   30.74
 -17  -3 -11    4.21    8.49
 -17   3 -11    1.91    6.36
  17   3 -11    2.90    7.62
  17   3  11   -3.57    9.68
  17  -3  11    5.43    5.71
 -17  -3 -12  342.66   35.44
 -17   3 -12  314.93   33.42
  17   3 -12  295.44   30.74
  17   3  12  266.78   29.84
  17  -3  12  315.53   45.50
 -17  -3 -13    3.40    5.75
 -17   3 -13   -0.66    5.54
  17   3 -13    2.42    3.67
  17   3  13    3.78    5.46
  17  -3  13    0.09    6.44
 -18   3   0  817.21   62.24
  18   3   0  970.97   73.51
  18  -3   0 1003.92   75.78
 -18  -3  -1    1.14    2.14
 -18   3  -1    1.28    4.11
 -18   3   1   -0.22    4.53
  18   3  -1    3.03    4.27
  18  -3  -1    1.99    3.26
  18   3   1    4.44    8.81
  18  -3   1    5.21    7.87
 -18  -3  -2 1657.07  121.03
 -18   3  -2 1559.59  114.80
  18   3  -2 1747.69  135.90
  18  -3  -2 1781.19  134.03
  18   3   2 1917.77  141.27
  18  -3   2 1712.68  134.56
 -18  -3  -3   -1.18    5.32
 -18   3  -3   -1.44   14.68
  18   3  -3    4.56    7.38
  18  -3  -3    4.90    6.84
  18   3   3    5.70    8.36
  18  -3   3    8.54    9.58
 -18  -3  -4 1107.76   82.19
 -18   3  -4 1001.72   81.72
  18  -3  -4 1066.85   79.49
  18   3  -4 1072.54   87.76
  18   3   4 1195.72   92.48
  18  -3   4 1012.14   79.08
 -18  -3  -5   14.09   12.70
 -18   3  -5    9.42    9.06
  18  -3  -5   18.97   14.88
  18   3  -5   26.04   17.54
  18   3   5   19.88   19.18
  18  -3   5   20.64   14.60
 -18  -3  -6 1543.83  111.10
 -18   3  -6 1369.49  102.40
  18   3  -6 1310.31   95.40
  18  -3  -6 1154.60   83.00
  18   3   6 1488.97  109.02
  18  -3   6 1195.46   88.39
 -18  -3  -7   17.57    7.59
 -18   3  -7   20.06   16.71
  18  -3  -7   16.77   15.39
  18   3  -7   22.50    9.63
  18   3   7   19.28   16.89
  18  -3   7   20.49   17.18
 -18  -3  -8  850.30   63.67
 -18   3  -8  786.76   61.71
  18  -3  -8  572.95   49.45
  18   3  -8  611.55   49.95
  18   3   8  779.77   60.28
  18  -3   8  661.80   52.07
 -18  -3  -9   -3.41    8.71
 -18   3  -9   -0.54    4.92
  18   3  -9    2.86    3.90
  18   3   9    3.34    6.04
 -18  -3 -10  968.27   91.37
 -18   3 -10 1007.04   93.64
  18   3 -10  802.44   75.82
  18   3  10  925.21   90.48
  18  -3  10  858.93   80.54
 -18  -3 -11   22.67   15.09
 -18   3 -11   21.11   16.96
  18   3 -11   16.77   11.70
  18   3  11   22.15   19.54
  18  -3  11   18.50   17.15
 -18  -3 -12  602.21   70.48
 -18   3 -12  585.98   68.32
  18   3 -12  468.58   55.51
  18   3  12  493.65   59.98
  18  -3  12  506.16   60.25
  19   3   0    2.68    7.41
  19  -3   0    3.02    3.58
 -19   3  -1   23.40    8.68
  19   3  -1   29.72   31.65
  19  -3  -1   25.02   23.60
  19   3   1   28.18   24.57
  19  -3   1   19.99   20.39
 -19   3  -2   29.85   15.61
  19   3  -2   27.23   30.09
  19  -3  -2   23.63   21.91
  19   3   2   64.28   13.41
  19  -3   2   22.65   20.19
 -19  -3  -3   35.36   23.61
 -19   3  -3   24.66   20.20
  19   3  -3   37.93   27.31
  19  -3  -3   30.62   22.52
  19   3   3   36.39   25.74
  19  -3   3   32.45   22.08
 -19  -3  -4   24.39   13.27
 -19   3  -4   24.19   25.07
  19   3  -4   27.73   19.57
  19  -3  -4   21.40   14.25
  19   3   4   22.94   11.58
  19  -3   4   26.07   20.19
 -19  -3  -5   19.92   15.76
 -19   3  -5   19.60   14.20
  19  -3  -5   14.24   12.26
  19   3  -5   15.64    8.95
  19   3   5   16.91   20.59
  19  -3   5   17.41   16.57
 -19  -3  -6   82.44   21.38
 -19   3  -6   60.48   39.13
  19  -3  -6   53.66   13.71
  19   3  -6   68.06   17.38
  19   3   6   77.81   13.34
  19  -3   6   66.10   22.62
 -19  -3  -7    4.86    6.31
 -19   3  -7    5.49    8.06
  19  -3  -7    5.06    5.19
  19   3  -7    0.97    6.41
  19   3   7   10.39   12.73
  19  -3   7    9.87    7.81
 -19  -3  -8  158.02   26.11
 -19   3  -8  122.40   37.53
  19   3  -8  110.43   12.32
  19   3   8  119.19   14.20
  19  -3   8   99.07   30.98
 -19  -3  -9   20.19   14.98
 -19   3  -9   15.75   12.28
  19   3  -9   10.10   11.05
  19   3   9   15.76   21.01
  19  -3   9   14.20   10.77
 -19  -3 -10  320.29   41.70
 -19   3 -10  297.94   37.34
  19   3 -10  219.24   29.20
  19   3  10  282.66   36.55
  19  -3  10  246.85   31.41
  20   3   0 1494.27   53.81
  20  -3   0 1474.46   45.77
  20   3  -1   13.02   11.73
  20   3   1    8.16   11.12
  20  -3  -1    9.91    8.58
  20  -3   1   10.51   13.61
  20  -3  -2 1183.20  104.57
  20   3  -2 1227.12   34.48
  20   3   2 1269.15  105.06
  20  -3   2 1216.43   25.64
 -20   3  -3    5.77    6.82
  20   3  -3    8.11    8.72
  20  -3  -3    7.24   12.35
  20   3   3   10.97    8.35
  20  -3   3   10.81   10.46
 -20   3  -4 1278.44   24.09
  20   3  -4 1362.16   29.86
  20  -3  -4 1317.43  121.36
  20   3   4 1420.19   28.62
  20  -3   4 1303.59  126.42
 -20  -3  -5    7.37    6.57
 -20   3  -5    6.03    5.76
  20  -3  -5    9.66    9.92
  20   3  -5    6.01   10.33
  20   3   5   12.20   11.41
  20  -3   5    6.67    3.68
 -20  -3  -6  723.53   56.99
 -20   3  -6  689.02   54.54
  20   3  -6  622.61   48.76
  20   3   6  711.34   57.49
  20  -3   6  633.34   48.15
 -20  -3  -7    4.45    7.06
 -20   3  -7   -0.80    7.96
  20   3  -7   -1.22    6.89
  20   3   7    2.49    4.09
  20  -3   7    1.32    4.94
 -20  -3  -8  729.65   83.71
 -20   3  -8  725.72   83.68
  20   3  -8  597.68   75.01
  20   3   8  714.33   87.79
  20  -3   8  700.89   81.52
  21   3   0    1.08    3.75
  21  -3   0    0.51    7.99
  21   3  -1    4.20    4.09
  21  -3  -1    1.45    4.57
  21   3   1    2.80    7.28
  21  -3   1    1.81    5.32
  21   3  -2   16.94   15.29
  21  -3  -2   14.63   17.60
  21   3   2   19.03   20.84
  21  -3   2   14.08   15.01
  21   3  -3   15.41   12.68
  21  -3  -3   12.78   13.32
  21   3   3   23.18   18.69
  21  -3   3   12.12   11.81
  21   3  -4   71.35   38.44
  21   3   4   65.28   32.30
  21  -3   4   68.88   25.27
 -21   3  -5    2.52    5.93
  21   3  -5    7.93    7.05
  21   3   5    7.14    6.70
  21  -3   5    9.77   10.51
   0   4   0  664.39   14.13
   0  -4   0  645.39   13.47
   0   4   0  705.32   13.45
   0  -4   0  633.52   11.96
   0   4  -1  147.89    6.09
   0  -4   1  146.38    5.88
   0   4   1  137.38    6.70
   0  -4  -1  150.71    6.28
   0   4  -1  163.78    5.63
   0  -4   1  156.55    5.21
   0   4   1  149.93    4.49
   0  -4  -1  111.16    3.64
   0   4  -2   77.75    5.68
   0  -4   2   67.71    8.16
   0   4   2   60.96    7.38
   0  -4  -2   65.94    7.99
   0   4  -2   84.36   13.94
   0  -4   2   74.26    8.47
   0   4   2   55.99    7.62
   0  -4  -2   30.44    3.87
   0   4  -3    2.00    2.88
   0  -4   3    1.76    2.89
   0   4   3    3.78    4.27
   0  -4  -3    2.33    3.17
   0   4  -3    2.92    2.77
   0  -4   3    1.41    2.50
   0   4   3   -0.27    1.80
   0  -4  -3    2.98    2.23
   0   4   4 2178.85   38.49
   0   4  -4 1946.32   34.83
   0  -4   4 2124.08   37.54
   0   4   4 2401.37   44.95
   0   4  -4 2858.54   50.17
   0  -4   4 2588.20   45.20
   0   4   4 1544.14   26.79
   0  -4  -4 2431.34   41.20
   0   4   5   23.23   10.82
   0   4  -5   19.41    6.12
   0  -4   5   20.52    9.04
   0   4   5   26.20   14.35
   0   4  -5   24.16    4.87
   0  -4   5   24.17    5.60
   0   4   5   20.02    5.31
   0  -4  -5   29.44    7.24
   0   4   6 1889.44   33.44
   0   4  -6 1519.63   28.16
   0  -4   6 1906.39   33.81
   0   4   6 2097.17   39.49
   0   4  -6 2416.70   47.74
   0   4   6 1998.15   34.39
   0  -4  -6 2320.53   38.73
   0   4  -7  213.41   17.13
   0  -4   7  300.80   25.69
   0   4   7  317.32   29.77
   0   4   7  357.73   26.25
   0   4  -7  403.52   30.65
   0   4   7  318.30   24.68
   0   4  -8 9117.58   39.12
   0   4   8 8029.28   30.59
   0  -4  -9 1153.24   31.51
   0   4   9 1302.28   23.59
   0   4  -9 1359.80   27.35
   0   4   9 1195.12   27.10
   0  -4 -10  793.13   20.30
   0   4 -10  356.37   21.74
   0   4 -10  901.13   27.00
   0   4  10  848.75   25.56
   0  -4 -11 1946.83   81.02
   0   4 -11  925.93   53.09
   0   4 -11 2316.01   88.03
   0   4  11 2045.52   76.30
   0  -4 -12 1218.90   64.53
   0   4 -12  646.90   25.56
   0   4 -12 1373.55   59.40
   0   4  12 1305.69   48.28
   0  -4 -13 1332.60   54.36
   0   4 -13  746.53   32.65
   0   4 -13 1508.77   67.00
   0   4  13 1376.35   57.07
   0  -4 -14  239.05   27.14
   0   4 -14  139.74   26.84
   0   4 -14  271.00   29.23
   0   4  14  253.98   25.68
   0  -4 -15  788.70   51.64
   0   4 -15  498.40   32.36
   0   4 -15  912.99   60.53
   0   4  15  822.94   50.53
   0  -4 -16  358.95   42.11
   0   4 -16  235.29   32.64
   0   4 -16  413.47   47.80
   0   4  16  378.05   43.26
   0  -4 -17  301.80   34.69
   0   4 -17  224.54   26.51
   0   4 -17  345.97   40.03
   0   4  17  322.72   40.95
   0  -4 -18   15.85   11.20
   0   4 -18   11.93    8.65
   0   4  18   22.47   19.11
   0  -4 -19  286.72   35.78
   0   4 -19  221.37   30.89
   0   4  19  299.79   37.22
   0  -4  19  330.84   42.64
   0   4 -20  270.08   24.92
   0   4  20  323.24   44.20
   0  -4  20  364.93   36.26
   0   4 -21  483.66   49.44
   0   4  21  589.64   56.27
   0   4  21  587.50   55.88
   0  -4  21  688.84   67.02
  -1   4   0   -2.61    3.86
   1   4   0    1.29    3.04
   1  -4   0   -1.78    3.93
  -1  -4   0    0.16    2.40
  -1   4   0    0.07    2.08
   1  -4   0    0.44    1.48
   1   4   0    0.50    1.84
  -1  -4   0   -0.35    2.69
  -1   4  -1  221.94    7.49
   1   4  -1  222.32    6.85
   1  -4   1  228.48    7.03
  -1   4   1  228.77    7.92
  -1  -4   1  229.64   10.37
   1   4   1  230.18    7.32
   1  -4  -1  220.23    7.10
  -1  -4  -1  224.75    6.94
  -1   4  -1  232.86    7.52
   1  -4   1  234.10   10.08
  -1   4   1  249.97    6.39
   1   4  -1  236.28    7.13
  -1  -4   1  227.39    6.38
   1  -4  -1  195.40    4.45
   1   4   1  203.99    9.74
  -1  -4  -1  153.46    5.48
  -1   4  -2  195.46    7.09
   1   4  -2  202.41    6.72
   1  -4   2  198.06    6.55
  -1  -4   2  207.47    6.93
  -1   4   2  218.68    7.28
   1  -4  -2  227.37    6.96
   1   4   2  185.58    6.91
  -1  -4  -2  217.15    7.50
  -1   4  -2  240.65    7.25
   1  -4   2  232.38    6.43
   1   4  -2  233.03    7.88
  -1  -4   2  210.67    6.61
  -1   4   2  209.33    6.18
   1   4   2  140.60    5.53
   1  -4  -2  118.35    3.02
  -1   4  -3 2890.96   49.95
   1   4  -3 2910.28   49.92
   1  -4   3 2790.00   49.20
  -1  -4   3 3055.42   52.27
  -1   4   3 3084.70   53.21
   1  -4  -3 2896.16   49.81
   1   4   3 3112.48   56.66
  -1   4  -3 3598.53   61.35
   1  -4   3 3419.41   58.10
   1   4  -3 3558.10   60.85
  -1  -4   3 3292.15   56.35
  -1   4   3 1612.78   27.15
  -1  -4  -3 2325.69   39.62
   1  -4  -3 3086.24   51.23
   1   4   4   84.21    5.12
  -1   4  -4   83.04    5.48
   1   4  -4   84.41    6.07
   1  -4   4   82.05    4.97
  -1  -4   4   91.55    4.82
  -1   4   4   96.24   15.19
   1   4   4   90.07    5.80
   1  -4  -4   89.65    4.89
  -1   4  -4  108.96    6.63
   1  -4   4  106.38    5.46
   1   4  -4  104.78    6.66
  -1  -4   4  102.37    5.61
   1   4   4   57.78    5.81
  -1   4   4   67.60    3.09
  -1  -4  -4   92.29    4.22
   1  -4  -4  100.77    5.18
  -1   4   5 5142.10   83.48
   1   4   5 5124.58   23.35
  -1   4  -5 4449.14   73.75
   1   4  -5 4300.04   71.07
   1  -4   5 5376.53   24.18
  -1   4   5 5755.87   94.43
   1   4   5 5659.87   92.62
  -1   4   5 6452.15  102.46
  -1   4  -5 6747.58  110.06
   1   4  -5 6423.36  104.54
  -1  -4   5 6229.92  100.86
   1   4   5 4647.07   75.16
  -1   4   5 5204.98   82.98
  -1  -4  -5 5767.34   92.55
  -1   4   6  252.68   22.21
  -1   4  -6  200.62   23.37
   1   4  -6  204.70   17.98
   1  -4   6  237.07   18.39
  -1  -4   6  272.92   20.27
  -1   4   6  289.04   22.60
   1   4   6  282.25   21.85
  -1   4   6  338.46   24.69
  -1   4  -6  305.94   25.87
   1   4  -6  328.96   31.95
   1   4   6  253.80   19.47
  -1   4   6  281.95   20.94
  -1  -4  -6  300.48   22.14
  -1  -4  -7 4441.77   74.56
  -1   4  -7 2841.88   49.44
   1   4  -7 2867.62   49.13
  -1  -4   7 4351.80   73.26
  -1   4   7 4598.52   77.78
  -1   4   7 5270.27   85.01
  -1   4  -7 5582.15   92.21
   1   4   7 4495.38   74.22
  -1   4   7 4778.38   77.39
  -1  -4  -7 5159.05   83.81
  -1  -4  -8  596.10   16.06
   1   4  -8  336.93   21.10
  -1   4  -8  376.54   13.45
  -1  -4   8  569.01   13.95
  -1   4   8  630.31   14.70
   1   4   8  705.24   14.42
  -1   4  -8  743.02   30.08
  -1   4   8  711.37   14.25
   1   4  -8  708.74   17.78
   1   4   8  616.46   16.21
  -1   4   8  654.13   13.45
  -1  -4  -9 2536.76   54.39
  -1   4  -9 1348.93   33.70
  -1   4   9 2479.61   43.45
  -1   4  -9 2972.16   51.03
  -1   4   9 3071.94   51.69
   1   4   9 2740.10   45.64
  -1   4   9 2794.08   45.67
  -1  -4 -10 1112.81   31.06
   1   4 -10  538.78   24.22
  -1   4  10 1162.01   27.29
  -1   4 -10 1325.45   35.41
   1   4 -10 1370.78   32.20
   1   4  10 1174.95   26.05
  -1   4  10 1230.73   28.48
  -1  -4 -11 1605.88   64.04
   1   4 -11  875.59   34.90
  -1   4 -11  772.91   33.29
  -1   4 -11 1686.18   71.15
   1   4 -11 1984.19   77.55
   1   4  11 1766.00   66.52
  -1   4  11 1799.27   68.74
  -1  -4 -12  491.61   22.10
  -1   4 -12  249.70   19.69
   1   4 -12  291.33   22.49
  -1   4 -12  597.49   19.34
   1   4 -12  588.49   19.40
   1   4  12  526.15   37.81
  -1   4  12  507.17   36.74
   1  -4 -13  846.91   37.41
  -1  -4 -13  821.83   35.61
  -1   4 -13  437.35   23.99
   1   4 -13  515.05   27.10
  -1   4 -13  967.38   42.59
   1   4 -13  992.69   48.17
   1   4  13  884.08   37.61
  -1   4  13  879.86   36.69
   1  -4 -14  569.91   44.15
  -1  -4 -14  550.82   22.66
  -1   4 -14  329.79   33.17
   1   4 -14  381.62   22.94
  -1   4 -14  698.91   42.28
   1   4 -14  690.15   40.79
   1   4  14  586.47   59.33
  -1   4  14  595.53   13.11
   1  -4 -15  640.27   61.03
  -1  -4 -15  625.68   39.51
   1   4 -15  445.21   31.33
  -1   4 -15  378.83   25.75
  -1   4 -15  727.89   46.72
   1   4 -15  729.82   48.93
   1   4  15  682.75   42.51
  -1   4  15  654.95   44.80
   1  -4 -16  367.96   42.44
  -1  -4 -16  355.31   43.42
   1   4 -16  265.43   30.84
  -1   4 -16  235.67   32.57
   1   4 -16  443.33   54.52
   1   4  16  387.95   44.34
  -1   4  16  374.54   48.59
  -1  -4 -17  672.74   50.70
   1   4 -17  552.22   36.70
  -1   4 -17  463.76   32.76
   1   4 -17  771.14   55.90
   1   4  17  720.91   47.70
  -1   4  17  733.88   47.84
   1  -4  17  784.22   52.19
  -1  -4 -18  396.74   27.01
   1   4 -18  354.36   28.76
  -1   4 -18  296.25   21.18
  -1   4  18  381.72   48.45
   1   4 -18  464.37   59.86
   1   4  18  407.05   27.24
  -1   4  18  403.26   49.83
   1  -4  18  469.26   32.57
  -1  -4 -19  265.52   34.26
   1   4 -19  217.47   37.12
  -1   4 -19  207.74   26.49
  -1   4  19  272.43   40.75
   1   4 -19  317.75   40.28
   1   4  19  279.17   35.33
  -1   4  19  277.54   34.56
   1  -4  19  314.47   40.75
  -1  -4 -20  323.57   31.41
   1   4 -20  285.14   26.79
  -1   4 -20  263.57   24.79
  -1   4  20  347.96   36.86
   1   4  20  341.88   32.78
  -1   4  20  350.65   37.31
   1  -4  20  415.30   38.62
  -1  -4  20  387.39   35.92
  -1  -4 -21  212.64   30.49
  -1   4 -21  166.38   22.99
   1   4 -21  173.37   23.64
  -1   4  21  199.96   27.65
   1   4  21  216.36   29.05
  -1   4  21  213.39   28.29
   1  -4  21  215.12   45.79
  -1  -4  21  234.07   60.98
  -2   4   0   79.98   12.54
   2  -4   0   71.92    8.68
   2   4   0   79.50    9.53
  -2  -4   0   79.15    9.26
  -2   4   0   91.93    3.85
   2  -4   0   78.16    8.32
   2   4   0   74.51    9.35
  -2  -4   0   68.41    8.24
  -2   4  -1  373.87    9.94
   2  -4   1  358.06    9.44
  -2   4   1  387.76   10.20
   2   4  -1  395.04    9.69
   2  -4  -1  383.71    9.29
  -2  -4   1  361.95    8.84
  -2  -4  -1  350.82    8.95
  -2   4   1  400.07   15.03
  -2   4  -1  451.19    9.43
   2  -4   1  455.61    9.39
   2  -4  -1  406.37    7.49
   2   4  -1  398.61    9.98
  -2  -4   1  378.49    9.14
   2   4   1  310.40    8.64
  -2  -4  -1  233.73    7.95
   2  -4   2 7001.55  116.82
   2   4  -2 7496.41  127.16
  -2   4   2 7903.07  131.57
  -2  -4   2 7909.77  131.11
   2  -4  -2 7412.71  123.41
   2   4   2 7563.76  126.44
  -2   4  -2 8391.10  138.85
   2  -4   2 7168.11  118.74
   2   4   2 4559.99   77.05
   2   4   3  145.74    6.55
  -2   4  -3  142.28    6.97
   2  -4   3  133.75    6.14
   2   4  -3  137.28    5.47
  -2  -4   3  156.39    8.26
  -2   4   3  153.24    7.10
   2  -4  -3  149.88    7.79
   2   4   3  144.82   12.85
  -2   4  -3  166.71   15.28
  -2   4   3  168.72    3.22
   2  -4   3  154.94   13.74
   2   4  -3  155.15    6.72
  -2  -4   3  163.16    6.30
  -2   4   3  123.21    2.52
   2   4   3   75.44   15.28
  -2  -4  -3   97.49    6.99
  -2   4  -4  570.16   14.99
   2   4  -4  550.84   12.29
   2  -4   4  529.16   12.22
  -2  -4   4  628.29   12.78
  -2   4   4  664.91   14.74
   2  -4  -4  610.66   13.21
   2   4   4  607.47   14.08
  -2   4  -4  739.90   16.22
  -2   4   4  682.20   12.00
   2  -4   4  741.79   15.54
   2   4  -4  717.15   16.06
  -2  -4   4  708.36   16.76
   2   4   4  380.41   11.55
  -2   4   4  509.89    9.95
  -2  -4  -4  530.82   11.43
  -2  -4  -5  312.18   23.83
   2   4   5  301.36   22.70
  -2   4  -5  253.79   20.43
   2   4  -5  259.32   20.72
   2  -4   5  271.27   20.62
  -2  -4   5  313.58   23.57
  -2   4   5  331.42   25.74
  -2   4  -5  357.10   29.44
   2  -4   5  339.50   25.06
  -2   4   5  351.04   25.22
   2   4  -5  354.40   26.58
  -2  -4   5  350.08   25.95
   2   4   5  240.15   18.08
  -2  -4  -5  304.01   22.37
  -2   4   5  312.20   22.47
  -2  -4  -6 4126.14   71.74
  -2   4   6 3705.23   61.49
  -2   4  -6 2987.78   54.24
   2   4  -6 2885.96   51.11
  -2  -4   6 4009.46   65.55
  -2   4   6 4371.75   72.47
  -2   4  -6 4687.90   83.00
  -2   4   6 4883.41   78.43
   2   4  -6 5184.31   86.10
   2   4   6 3751.83   62.44
  -2   4   6 4402.54   70.69
  -2  -4  -6 4272.96   70.08
  -2  -4  -7  180.67   21.80
  -2   4   7  176.59   19.99
  -2   4  -7  140.91   17.56
   2   4  -7  127.09   15.14
  -2  -4   7  234.51   29.87
  -2   4   7  212.32   24.47
  -2   4  -7  291.59   33.61
  -2   4   7  228.87   25.49
   2   4  -7  252.49   29.03
   2   4   7  193.04   22.49
  -2   4   7  211.35   23.59
  -2  -4  -7  217.34   24.55
  -2  -4  -8 1060.61   22.53
  -2   4  -8  665.20   16.88
   2   4  -8  605.27   19.79
  -2  -4   8 1065.45   19.96
  -2   4   8 1151.61   21.90
  -2   4  -8 1339.26   26.42
   2   4  -8 1315.48   31.55
  -2   4   8 1292.55   22.08
   2   4   8 1091.44   21.05
  -2   4   8 1183.89   20.93
  -2  -4  -9  782.90   20.30
   2   4  -9  413.67   33.34
  -2   4  -9  448.74   13.35
  -2  -4   9  797.11   16.30
  -2   4   9  894.75   18.84
  -2   4  -9 1009.25   22.00
   2   4  -9  977.04   26.91
  -2   4   9  964.24   17.98
   2   4   9  861.77   18.21
  -2   4   9  908.32   18.06
  -2  -4 -10 2075.35   46.97
  -2   4 -10 1083.67   26.65
   2   4 -10 1125.53   25.85
  -2   4  10 2280.71   46.29
  -2   4 -10 2489.72   52.19
   2   4 -10 2619.15   54.75
   2   4  10 2253.00   50.07
  -2   4  10 2364.38   53.07
  -2  -4 -11 1045.19   71.15
  -2   4 -11  546.43   28.98
   2   4 -11  639.68   26.04
  -2   4  11 1170.61   45.47
  -2   4 -11 1345.83   52.93
   2   4 -11 1354.73   53.50
   2   4  11 1161.89   49.07
  -2   4  11 1234.72   49.48
  -2  -4 -12  450.02   33.66
   2   4 -12  291.92   22.13
  -2   4 -12  231.33   18.00
  -2   4  12  500.47   36.73
  -2   4 -12  446.13   33.67
   2   4 -12  568.39   41.88
   2   4  12  493.58   35.77
  -2   4  12  511.55   37.81
  -2  -4 -13  843.42   37.93
   2   4 -13  598.64   26.34
  -2   4 -13  450.09   22.33
  -2   4  13  914.73   38.64
  -2   4 -13 1131.77   53.90
   2   4 -13 1072.59   56.94
   2   4  13  912.74   38.82
  -2   4  13  990.97   42.59
  -2  -4 -14 1271.60   68.55
  -2   4 -14  755.01   42.89
   2   4 -14  945.23   53.20
  -2   4  14 1355.38   84.27
   2   4 -14 1588.99   91.61
   2   4  14 1405.35   75.80
  -2   4  14 1424.22   75.81
   2  -4  14 1576.43   84.91
  -2  -4 -15  993.23   61.02
   2   4 -15  712.06   49.80
  -2   4 -15  577.72   37.41
  -2   4  15  976.71   70.63
   2   4 -15 1203.56   83.61
   2   4  15 1082.35   65.81
  -2   4  15 1066.88   70.65
   2  -4  15 1221.25   75.23
  -2  -4 -16  143.13   24.77
   2   4 -16  119.86   14.75
  -2   4 -16   91.64   13.85
  -2   4  16  154.08   18.41
   2   4 -16  161.60   20.53
   2   4  16  155.93   23.18
  -2   4  16  162.62   18.96
   2  -4  16  196.74   27.65
  -2  -4 -17  506.76   37.16
   2   4 -17  416.12   27.92
  -2   4 -17  331.09   34.57
  -2   4  17  536.61   35.31
   2   4 -17  634.22   43.21
   2   4  17  536.58   39.46
  -2   4  17  538.21   41.26
   2  -4  17  589.99   41.73
  -2  -4 -18  391.46   26.94
   2   4 -18  351.85   31.40
  -2   4 -18  264.96   36.91
  -2   4  18  403.93   26.81
   2   4 -18  465.57   31.56
   2   4  18  403.78   50.27
  -2   4  18  402.56   49.75
   2  -4  18  466.73   31.94
  -2  -4 -19  481.91   42.31
   2   4 -19  433.47   33.21
  -2   4 -19  366.73   30.09
  -2   4  19  505.19   42.06
   2   4 -19  583.63   45.65
   2   4  19  523.42   41.81
  -2   4  19  528.96   40.25
   2  -4  19  554.95   61.85
  -2  -4 -20  103.87   12.40
   2   4 -20   95.72   12.72
  -2   4 -20   68.66   17.28
  -2   4  20  105.15    9.44
   2   4 -20  120.24   13.89
   2   4  20   98.84   21.49
  -2   4  20  106.69    9.15
   2  -4  20  123.34   51.09
  -2  -4 -21  499.99   43.38
  -2   4 -21  381.59   32.93
  -2   4  21  538.30   41.02
   2   4  21  507.08   39.66
  -2   4  21  513.58   39.41
   2  -4  21  578.01   45.91
  -2  -4  21  548.55   43.09
  -3   4   0    1.38    3.22
   3  -4   0    0.23    1.86
   3   4   0   -0.88    3.66
  -3  -4   0    1.31    2.60
   3  -4   0    0.87    1.26
   3   4   0   -0.91    4.44
  -3  -4   0   -0.54    3.04
   3  -4   0    0.80    1.73
  -3   4  -1 3238.24   57.09
  -3   4   1 3380.64   57.98
   3  -4   1 3019.96   51.98
   3  -4  -1 3192.24   54.55
   3   4  -1 3340.61   58.18
  -3  -4   1 3431.13   58.18
   3   4   1 3200.80   55.44
   3  -4   1 3380.74   56.74
   3  -4  -1 3467.55   57.16
   3   4  -1 3145.63   55.31
  -3  -4   1 3057.07   52.50
  -3  -4  -1 1906.38   33.62
   3  -4  -1 3296.95   54.44
   3  -4   1 3821.31   63.98
   3   4   2   51.26    6.79
  -3   4  -2   59.26    7.83
   3  -4   2   57.32    7.33
  -3   4   2   60.88    8.47
   3   4  -2   57.55    7.19
   3  -4  -2   57.98   12.78
  -3  -4   2   61.52   11.49
   3   4   2   61.43    8.08
  -3   4  -2   68.30   12.02
   3  -4   2   56.07    6.70
   3   4  -2   63.00   10.59
  -3  -4   2   59.55    9.88
   3   4   2   42.38   13.78
  -3  -4  -2   29.48    4.70
   3   4   3 4240.91   72.47
  -3   4  -3 4053.60   69.69
   3  -4   3 3816.09   65.33
   3   4  -3 4368.21   74.63
  -3   4   3 4789.58   80.96
  -3  -4   3 4568.24   76.41
   3  -4  -3 4403.06   74.32
   3   4   3 4225.96   72.58
  -3   4  -3 5444.17   91.52
   3  -4   3 5123.39   85.97
   3   4  -3 4741.28   80.71
  -3  -4   3 4831.77   81.82
   3   4   3 2374.64   44.44
  -3  -4  -3 2662.74   45.95
  -3  -4  -4   24.75   17.99
   3   4   4   19.71   11.82
  -3   4  -4   20.08   15.52
   3  -4   4   16.89    8.78
   3   4  -4   21.53    6.23
  -3  -4   4   23.05    3.05
  -3   4   4   30.88   14.36
   3  -4  -4   23.54    5.86
  -3   4  -4   14.26   12.21
   3  -4   4   23.81   14.92
   3   4  -4   28.44   16.83
  -3  -4   4   25.88   12.26
  -3   4   4   25.16    2.57
   3   4   4   14.84   11.84
  -3  -4  -4   18.31    8.03
  -3   4   4   21.87    3.10
  -3  -4  -5 3136.24   54.08
  -3   4  -5 2458.32   44.61
   3   4  -5 2748.50   45.81
  -3  -4   5 3509.26   57.47
  -3   4   5 3706.77   61.75
   3  -4  -5 3253.48   54.25
  -3   4  -5 3706.52   66.09
   3  -4   5 3921.70   64.94
   3   4  -5 3852.22   66.11
  -3   4   5 3973.71   63.24
   3   4   5 2535.31   43.98
  -3  -4  -5 3169.95   55.81
  -3   4   5 3639.08   58.05
  -3   4   6  220.39   16.90
  -3  -4  -6  226.15   19.26
  -3   4  -6  176.23   15.28
   3   4  -6  212.90   20.81
  -3  -4   6  236.15   19.46
  -3   4   6  267.97   20.57
  -3   4  -6  282.94   42.18
   3   4  -6  256.41   20.53
  -3   4   6  277.28   20.16
   3   4   6  194.29   16.38
  -3  -4  -6  236.17   17.97
  -3   4   6  247.74   18.35
  -3  -4  -7 3073.91   51.63
  -3   4   7 2959.41   47.53
  -3   4  -7 2102.29   38.86
   3   4  -7 2020.78   33.54
  -3  -4   7 3285.69   54.18
  -3   4   7 3635.64   60.87
  -3   4  -7 3971.87   65.50
   3   4  -7 3893.25   63.53
   3   4   7 3052.07   54.46
  -3   4   7 3571.20   55.26
  -3  -4  -8  173.14   21.31
  -3   4   8  159.12   18.13
  -3   4  -8  116.22   14.98
   3   4  -8  100.99   13.27
  -3  -4   8  195.86   22.08
  -3   4   8  206.33   24.06
  -3   4  -8  210.48   33.06
   3   4  -8  228.82   27.10
  -3   4   8  221.01   24.57
   3   4   8  182.15   21.13
  -3   4   8  189.12   21.64
  -3  -4  -9 1703.62   38.30
  -3   4  -9 1036.69   29.59
  -3  -4   9 1796.56   35.71
  -3   4   9 1953.82   39.65
  -3   4  -9 2109.42   44.15
   3   4  -9 2176.36   45.94
   3   4   9 1818.63   46.47
  -3   4   9 2040.53   43.20
  -3  -4 -10  709.59   34.13
  -3   4 -10  428.11   14.25
   3   4 -10  456.52   12.77
  -3  -4  10  812.83   18.59
  -3   4  10  818.65   19.78
   3   4 -10  917.68   26.72
  -3   4  10  928.72   19.97
   3   4  10  808.91   20.57
  -3   4  10  850.04   20.53
  -3  -4 -11 1639.89   64.71
   3   4 -11 1093.18   42.05
  -3   4 -11  960.09   38.04
  -3   4  11 1941.74   72.54
   3   4 -11 2176.40   87.95
   3   4  11 1880.74   77.74
  -3   4  11 2004.55   74.57
   3  -4  11 2161.29   82.29
  -3  -4 -12  399.74   35.85
  -3   4 -12  235.86   23.17
   3   4 -12  306.68   22.64
  -3   4  12  472.77   33.83
   3   4 -12  569.03   31.07
   3   4  12  458.58   33.36
  -3   4  12  457.90   37.47
   3  -4  12  536.59   41.09
  -3  -4 -13 1149.22   48.15
   3   4 -13  887.00   36.64
  -3   4 -13  665.15   31.05
  -3   4  13 1323.20   53.92
   3   4 -13 1558.86   69.90
   3   4  13 1331.83   55.63
  -3   4  13 1408.67   57.02
   3  -4  13 1562.81   64.81
  -3  -4 -14  490.15   50.66
   3   4 -14  407.56   26.74
  -3   4 -14  293.38   29.46
  -3   4  14  573.25   19.60
   3   4 -14  626.90   61.69
   3   4  14  550.28   64.20
  -3   4  14  580.47   20.27
   3  -4  14  627.95   62.36
  -3  -4 -15  872.38   55.68
   3   4 -15  752.39   45.97
  -3   4 -15  500.59   32.22
  -3   4  15  960.23   63.43
   3   4 -15 1125.40   69.41
   3   4  15  958.57   60.42
  -3   4  15 1001.33   60.49
   3  -4  15 1155.31   76.46
  -3  -4 -16  303.77   20.45
   3   4 -16  266.86   16.47
  -3   4 -16  184.25   32.14
  -3   4  16  321.75   19.32
   3   4 -16  369.38   24.34
   3   4  16  311.36   12.21
  -3   4  16  323.00   21.45
   3  -4  16  365.37   37.13
  -3  -4 -17  479.28   38.67
   3   4 -17  424.61   28.97
  -3   4 -17  288.74   45.58
  -3   4  17  516.44   34.58
   3   4 -17  571.43   41.68
   3   4  17  507.19   58.91
  -3   4  17  542.56   36.49
   3  -4  17  539.53   20.44
  -3  -4 -18  429.49   38.44
   3   4 -18  421.16   33.10
  -3   4 -18  306.82   32.20
  -3   4  18  480.92   42.97
   3   4 -18  522.32   41.91
   3   4  18  478.38   37.76
  -3   4  18  491.27   40.75
   3  -4  18  559.10   48.17
  -3  -4 -19  192.63   25.66
   3   4 -19  188.39   23.58
  -3   4 -19  155.11   21.83
  -3   4  19  233.20   29.16
   3   4 -19  237.89   31.40
   3   4  19  233.08   31.35
  -3   4  19  221.95   31.05
   3  -4  19  270.88   36.59
  -3  -4 -20  379.07   35.33
  -3   4 -20  271.04   25.67
  -3   4  20  406.26   35.36
   3   4 -20  457.02   41.27
   3   4  20  404.95   37.05
  -3   4  20  397.94   34.93
   3  -4  20  446.73   46.43
  -3  -4 -21  141.23   22.64
  -3   4 -21  107.79   16.57
   3   4 -21  161.97   35.23
   3   4  21  145.16   21.13
  -3   4  21  152.65   23.35
   3  -4  21  185.18   27.83
   4   4   0 1263.26   23.35
  -4   4   0 1360.51   25.94
   4  -4   0 1248.02   23.88
   4   4   0 1338.56   25.18
   4  -4   0 1476.12   25.58
   4   4   0 1101.72   25.34
  -4  -4   0  997.03   21.16
   4  -4   0 1422.72   24.83
   4   4   1    5.16    3.61
  -4   4  -1    6.71    6.86
   4  -4   1    5.50    5.54
  -4   4   1    6.98    3.76
   4  -4  -1    5.30    2.68
   4   4  -1    6.35    3.88
  -4  -4   1    4.82    3.06
   4   4   1    6.81    4.75
   4  -4  -1    5.80    3.66
   4  -4   1    5.71    4.18
   4   4  -1    7.01    6.01
  -4  -4   1    5.20    2.81
   4   4   1    4.61    2.60
  -4  -4  -1    2.78    3.42
   4  -4  -1    5.64    3.46
   4  -4   1    7.14    4.03
  -4   4  -2  891.38   18.41
   4  -4   2  818.55   16.85
  -4   4   2 1066.26   24.67
   4   4  -2  982.88   19.32
   4  -4  -2  955.81   18.47
  -4  -4   2 1045.06   19.27
   4   4   2  866.20   20.79
   4  -4   2 1111.52   20.61
   4   4  -2 1013.87   20.41
  -4  -4   2  995.16   19.39
   4   4   2  550.77   12.88
  -4  -4  -2  502.15   11.73
   4  -4   2 1188.57   22.29
  -4  -4  -3  455.58   12.95
   4   4   3  475.81   11.85
  -4   4  -3  417.76   11.26
   4  -4   3  404.73   10.75
   4   4  -3  457.63   10.00
  -4   4   3  508.23   11.78
   4  -4  -3  460.14   10.42
  -4  -4   3  501.15   10.49
   4  -4   3  514.12   11.51
   4   4  -3  497.46   14.78
  -4  -4   3  512.73   13.46
   4   4   3  249.39    8.65
  -4  -4  -3  257.12    8.80
  -4   4   3  418.94    6.97
   4  -4   3  553.28   12.69
  -4  -4  -4 4293.12   71.37
  -4   4  -4 3814.74   67.42
   4   4  -4 4169.82   67.60
  -4   4   4 4970.35   81.08
   4  -4  -4 4327.90   70.64
   4   4  -4 4973.80   82.21
   4   4   4 2571.28   48.51
  -4  -4  -4 3313.23   55.25
   4  -4   4 5667.51   93.65
  -4  -4  -5   99.74   10.52
  -4   4  -5   86.87   17.63
   4   4  -5   87.31   19.29
  -4   4   5  117.90   10.39
  -4  -4   5  118.71    9.84
   4  -4  -5   97.86    8.48
   4  -4  -5  128.97    9.74
   4  -4   5  124.72   10.96
   4   4  -5  108.28   11.41
  -4   4   5  118.95    9.10
   4   4   5   74.61   11.07
  -4  -4  -5   96.74    8.84
   4  -4   5  126.27   14.16
  -4  -4  -6  542.46   25.77
  -4   4  -6  425.50   13.07
   4   4  -6  472.58   23.56
  -4  -4   6  716.06   29.90
  -4   4   6  668.96   14.35
   4  -4  -6  572.34   12.30
   4  -4  -6  706.31   13.36
   4   4  -6  687.87   17.55
  -4   4   6  701.81   13.06
   4   4   6  505.50   13.67
   4  -4   6  728.31   18.60
  -4   4   7  535.10    8.86
  -4  -4  -7  525.05   15.21
  -4   4  -7  396.82   12.54
   4   4  -7  326.22   36.82
  -4  -4   7  585.15    9.14
  -4   4   7  651.00   14.40
   4  -4  -7  647.59   10.79
   4   4  -7  641.85   24.63
  -4   4   7  670.25   12.94
   4   4   7  526.26   13.28
   4  -4   7  620.80   69.45
  -4   4   8 1193.84   21.78
  -4  -4  -8 1283.78   26.06
  -4   4  -8  906.68   23.38
   4   4  -8  806.03   16.51
  -4  -4   8 1475.49   24.86
  -4   4   8 1567.03   30.34
   4  -4  -8 1594.57   27.05
   4   4  -8 1638.37   31.93
  -4   4   8 1648.44   26.99
   4   4   8 1285.37   28.62
   4  -4   8 1599.68   31.51
  -4  -4  -9  595.66   34.66
   4   4  -9  387.54   11.08
  -4   4  -9  414.57   15.76
  -4  -4   9  693.36   15.26
  -4   4   9  759.79   26.32
   4  -4  -9  784.57   17.77
   4   4  -9  803.88   23.45
  -4   4   9  801.96   17.37
   4   4   9  668.44   18.38
   4  -4   9  789.64   37.94
  -4  -4 -10  300.84   29.38
   4   4 -10  232.67   19.46
  -4   4 -10  190.24   17.36
  -4  -4  10  329.98   26.73
  -4   4  10  368.93   30.30
   4   4 -10  405.95   34.59
  -4   4  10  395.24   31.87
   4   4  10  342.16   30.45
   4  -4  10  399.39   45.62
  -4  -4 -11  788.15   34.38
   4   4 -11  607.85   23.42
  -4   4 -11  515.64   22.89
  -4  -4  11  897.12   32.91
  -4   4  11  961.55   38.71
   4   4 -11 1047.85   49.94
   4   4  11  887.95   34.98
   4  -4  11 1058.81   49.85
  -4   4  11  994.15   36.95
  -4  -4 -12 1027.12   46.85
   4   4 -12  879.81   32.96
  -4   4 -12  649.51   26.67
  -4   4  12 1306.16   48.17
   4   4 -12 1401.22   54.00
   4   4  12 1198.79   50.20
   4  -4  12 1463.25   57.10
  -4   4  12 1257.62   46.53
  -4  -4 -13  741.12   37.16
   4   4 -13  670.37   30.36
  -4   4 -13  474.59   26.05
  -4   4  13  942.32   39.36
   4   4 -13 1010.23   48.66
   4   4  13  910.20   39.53
   4  -4  13 1052.80   61.18
  -4   4  13  934.06   42.00
  -4  -4 -14  142.66   18.67
   4   4 -14  142.28   15.30
  -4   4 -14   97.83   13.03
  -4   4  14  182.32   20.90
   4   4 -14  222.48   25.12
   4   4  14  175.34   20.30
   4  -4  14  207.94   24.41
  -4   4  14  181.76   18.94
  -4  -4 -15  783.81   49.43
   4   4 -15  743.21   43.72
  -4   4 -15  467.85   30.48
  -4   4  15  927.19   55.57
   4   4 -15 1079.30   65.30
   4   4  15  917.03   55.11
  -4   4  15  962.24   59.74
   4  -4  15 1082.35   65.70
  -4  -4 -16  366.91   40.38
   4   4 -16  356.89   26.14
  -4   4 -16  224.70   16.23
  -4   4  16  442.07   25.80
   4   4 -16  543.65   35.49
   4   4  16  418.85   26.05
  -4   4  16  434.50   24.83
   4  -4  16  492.27   32.83
  -4  -4 -17  764.59   50.92
   4   4 -17  781.32   46.45
  -4   4 -17  514.80   36.25
  -4   4  17  891.50   56.68
   4   4 -17 1006.56   67.92
   4   4  17  878.47   59.85
  -4   4  17  919.49   62.13
   4  -4  17 1014.54   61.85
  -4  -4 -18   87.53   27.60
   4   4 -18   97.65   16.11
  -4   4 -18   64.19   20.29
  -4   4  18  106.47   23.29
   4   4 -18  132.48   20.51
   4   4  18  102.00   20.86
  -4   4  18  115.93   17.68
   4  -4  18  130.54   37.48
  -4  -4 -19  502.33   41.67
  -4   4 -19  358.98   30.72
  -4   4  19  591.90   43.99
   4   4 -19  609.11   55.75
   4   4  19  540.05   45.65
  -4   4  19  567.92   46.23
   4  -4  19  645.32   50.47
  -4  -4 -20  285.36   35.75
  -4   4 -20  208.39   25.47
   4   4 -20  364.50   18.16
   4   4  20  314.68   53.32
  -4   4  20  311.23   38.67
   4  -4  20  330.35   44.49
  -4  -4 -21  466.12   37.46
  -4   4 -21  378.27   31.36
   4   4 -21  585.05   46.03
   4   4  21  519.72   44.95
   4  -4  21  565.53   45.19
   5   4   0    1.28    1.70
  -5   4   0    1.71    4.41
   5  -4   0   -0.77    3.41
   5   4   0    1.24    3.37
   5   4   0    0.74    2.33
  -5  -4   0    0.48    2.72
   5  -4   0    0.06    1.37
  -5   4   0    0.35    1.81
  -5   4  -1 4664.96   80.78
  -5   4   1 4622.92   75.86
   5  -4  -1 4275.57   69.79
   5   4  -1 4869.72   79.03
   5   4   1 4659.43   78.12
   5   4  -1 4301.33   71.26
   5   4   1 2928.30   49.75
  -5  -4  -1 2638.42   44.98
   5  -4  -1 3004.22   48.44
   5  -4   1 5235.96   84.52
  -5   4   1 4830.07   77.01
   5   4   2    5.84    3.49
  -5   4  -2    5.38    3.63
   5  -4   2    3.90    2.85
  -5   4   2    6.13    2.80
   5  -4  -2    4.43    2.87
   5   4  -2    6.53    4.77
  -5  -4   2    6.50    3.23
   5  -4   2    6.82    4.98
   5   4  -2    6.46    3.34
  -5  -4   2    2.89    4.26
   5  -4  -2    3.91    2.14
   5   4   2   -1.12    4.65
  -5  -4  -2    2.32    2.18
  -5   4   2    6.49    3.51
   5  -4   2    6.64    4.02
  -5  -4  -3 3428.20   57.90
   5   4   3 3370.09   56.44
  -5   4  -3 3347.14   56.72
  -5   4   3 4002.95   66.19
   5   4  -3 3702.76   60.78
   5  -4  -3 3515.96   58.12
  -5  -4   3 4083.88   66.11
   5  -4  -3 3841.53   61.05
   5   4  -3 3694.80   62.58
   5   4   3 2143.07   39.37
  -5  -4  -3 2014.38   35.40
  -5   4   3 2662.79   42.57
   5  -4   3 4362.71   72.02
  -5  -4  -4  193.02   17.70
  -5   4  -4  183.84   15.28
   5   4  -4  183.18   25.05
  -5   4   4  240.71   19.15
   5  -4  -4  218.50   16.86
  -5  -4   4  233.54   17.78
   5  -4   4  195.60   16.08
   5  -4  -4  247.81   18.19
   5   4  -4  190.64   16.15
   5   4   4  129.67   14.39
  -5   4   4  125.86    9.31
   5  -4   4  268.59   21.42
  -5  -4  -5 3094.34   53.23
  -5   4  -5 2523.49   43.78
  -5  -4   5 3630.65   55.86
   5  -4  -5 3362.04   53.17
   5  -4  -5 4079.89   61.87
   5   4  -5 3300.74   57.05
  -5  -4  -6  140.30   17.49
  -5   4  -6   97.11   21.52
   5   4  -6  109.49   14.17
  -5  -4   6  174.25   20.52
  -5   4   6  176.25   20.79
   5  -4  -6  145.93   16.55
   5  -4  -6  185.49   20.68
   5   4  -6  177.97   21.17
  -5   4   6  169.34   18.79
   5   4   6  127.11   15.68
   5  -4   6  175.23   25.17
  -5   4   7 1858.06   31.28
  -5  -4  -7 1852.92   39.34
  -5   4  -7 1470.29   35.60
  -5  -4   7 2318.66   36.94
  -5   4   7 2329.81   38.71
   5  -4  -7 2596.89   41.34
   5   4  -7 2331.88   50.62
  -5   4   7 2362.23   37.12
   5  -4   7 2547.19   44.30
  -5  -4  -8  220.36   20.87
  -5   4   8  269.54   19.99
  -5   4  -8  196.79   20.90
   5   4  -8  185.15   14.10
  -5  -4   8  330.65   23.77
  -5   4   8  345.99   25.35
   5  -4  -8  354.36   26.26
   5   4  -8  371.35   28.78
  -5   4   8  349.87   25.16
   5   4   8  289.37   23.98
   5  -4   8  358.04   29.55
  -5  -4  -9 1650.00   36.94
   5   4  -9 1160.06   24.42
  -5   4  -9 1176.48   31.15
  -5  -4   9 2059.50   39.87
  -5   4   9 2170.29   44.61
   5  -4  -9 2257.41   44.17
   5   4  -9 2195.23   56.80
  -5   4   9 2205.52   42.74
   5   4   9 1828.60   46.53
   5  -4   9 2179.32   53.99
  -5  -4 -10  452.21   20.48
  -5   4 -10  332.30   17.07
   5   4 -10  357.08   14.81
  -5  -4  10  587.28   22.91
  -5   4  10  600.01   48.67
   5  -4 -10  625.07   10.69
   5   4 -10  614.07   50.40
  -5   4  10  631.74   24.63
   5   4  10  524.05   13.48
   5  -4  10  579.83   54.75
  -5  -4 -11  713.88   30.30
   5   4 -11  621.21   23.60
  -5   4 -11  485.77   33.28
  -5  -4  11  880.64   33.47
  -5   4  11  964.33   40.06
   5  -4 -11  962.46   36.96
   5   4 -11 1004.05   43.48
   5   4  11  835.17   41.04
   5  -4  11  967.25   39.51
  -5  -4 -12  119.22   23.73
   5   4 -12  121.32   12.96
  -5   4 -12   95.23   12.91
  -5  -4  12  151.94   15.32
  -5   4  12  160.28   17.23
   5  -4 -12  156.11   17.21
   5   4 -12  180.30   20.83
   5   4  12  155.68   18.11
   5  -4  12  177.16   23.24
  -5  -4 -13  943.39   52.49
   5   4 -13  944.27   54.71
  -5   4 -13  647.66   37.24
  -5   4  13 1282.64   68.14
   5   4 -13 1334.68   78.41
   5   4  13 1133.06   65.01
   5  -4  13 1378.80   74.80
  -5   4  13 1251.66   66.41
  -5  -4 -14  229.39   25.04
   5   4 -14  236.81   25.11
  -5   4 -14  149.64   26.50
  -5   4  14  289.48   32.46
   5   4 -14  305.64   32.44
   5   4  14  262.74   28.78
   5  -4  14  312.04   34.31
  -5   4  14  293.20   29.16
  -5  -4 -15  594.59   37.54
   5   4 -15  592.51   35.02
  -5   4 -15  382.75   44.12
  -5   4  15  758.39   44.85
   5   4 -15  803.92   59.59
   5   4  15  691.21   42.75
   5  -4  15  746.50   47.68
  -5   4  15  765.85   45.59
  -5  -4 -16  254.74   18.92
   5   4 -16  267.67   16.33
  -5   4 -16  164.53   22.61
  -5   4  16  294.13   18.08
   5   4 -16  332.02   41.67
   5   4  16  296.38   37.12
   5  -4  16  339.26   25.36
  -5   4  16  298.84   37.60
  -5  -4 -17  484.70   32.82
   5   4 -17  509.11   31.19
  -5   4 -17  303.20   22.86
  -5   4  17  549.62   35.93
   5   4 -17  646.60   47.62
   5   4  17  521.93   33.86
   5  -4  17  628.09   41.74
  -5   4  17  577.75   36.02
  -5  -4 -18  326.37   30.81
  -5   4 -18  222.87   30.09
  -5   4  18  378.21   32.02
   5   4 -18  431.64   48.01
   5   4  18  373.68   31.33
   5  -4  18  431.52   36.32
  -5   4  18  382.72   30.09
  -5  -4 -19  236.62   38.08
  -5   4 -19  161.30   20.65
   5   4 -19  321.66   38.44
   5   4  19  284.08   34.09
   5  -4  19  324.89   39.45
  -5   4  19  283.58   32.19
  -5  -4 -20  294.67   53.72
  -5   4 -20  205.80   33.03
   5   4 -20  376.47   21.05
   5   4  20  339.63   35.14
   5  -4  20  383.50   39.98
  -5  -4 -21  109.86   31.35
  -5   4 -21   73.99   24.77
   5   4 -21  154.66   28.74
   5   4  21  111.46   23.32
   5  -4  21  143.91   45.81
   6   4   0 1401.34   25.12
  -6   4   0 1316.98   33.43
   6  -4   0 1216.47   25.52
   6   4   0 1317.26   24.71
   6   4   0 1038.58   22.43
   6  -4   0 1226.60   22.47
  -6   4   0 1420.21   24.84
   6   4  -1    5.07    3.95
   6   4   1    4.53    2.86
  -6   4  -1    4.38    4.44
  -6   4   1    2.19    4.32
   6  -4   1   -0.01    7.06
   6  -4  -1    3.35    4.07
   6   4  -1    7.92    3.74
   6   4   1    5.04    4.61
   6   4  -1    2.69    2.50
   6   4   1    3.80    2.41
   6  -4  -1    2.97    1.82
   6  -4   1    4.55    3.37
  -6   4   1    4.14    2.35
  -6   4  -1    4.57    2.69
  -6  -4  -2 3286.36   58.63
   6   4   2 3027.01   52.09
  -6   4  -2 3574.45   61.34
  -6   4   2 4078.70   70.18
   6  -4  -2 3707.77   69.34
   6   4  -2 4124.38   67.36
   6   4  -2 3819.84   65.07
   6   4   2 2407.47   45.83
   6  -4   2 4137.56   71.33
  -6   4   2 3308.39   53.39
  -6   4  -2 4211.04   69.41
   6   4  -3   65.02    7.76
  -6  -4  -3   58.35   10.04
  -6   4  -3   60.80    7.28
  -6   4   3   71.43   15.70
   6  -4  -3  132.66   43.66
   6   4  -3   96.73   24.06
   6  -4   3   76.66    7.63
   6   4  -3   64.58   10.11
   6   4   3   44.54    9.51
  -6   4   3   44.45    4.17
   6  -4   3   81.20    9.08
  -6  -4  -4  693.64   18.92
  -6   4  -4  581.68   14.72
  -6   4   4  923.75   29.19
   6   4  -4  846.86   57.10
   6  -4  -4  765.81   14.85
  -6  -4   4  881.05   15.33
   6  -4  -4  893.23   16.35
   6   4  -4  882.94   20.20
   6   4   4  487.81   13.22
  -6   4   4  475.79    9.17
   6  -4   4  924.12   19.08
  -6  -4  -5  297.03   33.88
  -6   4  -5  283.51   32.67
   6   4  -5  280.41   34.99
  -6   4   5  410.62   46.79
   6  -4  -5  349.58   38.58
  -6  -4   5  399.51   44.05
   6  -4  -5  388.47   42.53
   6   4  -5  401.17   45.06
  -6   4   5  271.82   29.81
   6   4   5  238.00   29.26
   6  -4   5  394.18   44.64
  -6  -4  -6 1997.31   36.69
  -6   4  -6 1758.47   32.94
   6   4  -6 1662.16   27.76
  -6   4   6 2677.36   45.98
  -6  -4   6 2730.68   42.37
   6  -4  -6 2224.68   37.47
   6  -4  -6 2731.38   42.64
   6   4  -6 2666.36   60.76
  -6   4   6 2318.05   36.28
   6   4   6 1839.13   38.71
   6  -4   6 2741.72   51.80
  -6   4   7  478.89   34.34
  -6  -4  -7  434.69   15.44
  -6   4  -7  382.32   13.01
   6   4  -7  334.14   24.19
  -6   4   7  614.82   14.74
  -6  -4   7  604.92   12.86
   6  -4  -7  640.38   45.40
   6   4  -7  598.53   13.74
  -6   4   7  587.47   12.88
   6   4   7  450.46   14.84
   6  -4   7  631.74   18.00
  -6   4   8  362.71   26.33
  -6  -4  -8  349.07   27.66
  -6   4  -8  311.33   24.22
   6   4  -8  290.97   21.02
  -6   4   8  493.73   36.45
  -6  -4   8  478.81   34.02
   6  -4  -8  496.08   35.51
   6   4  -8  450.67   34.00
  -6   4   8  493.76   35.24
   6   4   8  375.94   28.65
   6  -4   8  501.14   46.12
  -6  -4  -9  334.14   32.62
  -6   4   9  320.66   26.16
   6   4  -9  272.98   22.09
  -6   4  -9  266.78   23.84
  -6  -4   9  475.60   38.04
  -6   4   9  472.41   38.07
   6  -4  -9  502.16   40.89
   6   4  -9  494.06   46.86
  -6   4   9  477.83   38.23
   6   4   9  389.68   32.61
   6  -4   9  505.32   43.05
  -6  -4 -10  980.68   41.03
   6   4 -10  907.11   32.74
  -6   4 -10  784.50   32.00
  -6  -4  10 1425.96   50.52
  -6   4  10 1433.13   51.87
   6  -4 -10 1480.29   53.72
   6   4 -10 1441.33   54.04
  -6   4  10 1468.36   52.52
   6   4  10 1204.59   49.99
   6  -4  10 1394.07   53.56
  -6  -4 -11  355.52   33.11
   6   4 -11  365.59   10.33
  -6   4 -11  302.68   17.55
  -6  -4  11  502.07   34.71
  -6   4  11  530.30   37.35
   6  -4 -11  533.88   37.65
   6   4 -11  545.26   47.73
   6   4  11  437.59   35.11
   6  -4  11  516.99   44.44
  -6  -4 -12  210.36   21.28
   6   4 -12  216.40   18.35
  -6   4 -12  152.05   15.86
  -6  -4  12  266.57   21.50
  -6   4  12  266.99   22.92
   6  -4 -12  259.42   27.68
   6   4 -12  293.95   26.55
   6   4  12  248.75   22.96
   6  -4  12  296.59   27.04
  -6  -4 -13  432.38   15.88
   6   4 -13  495.11   28.69
  -6   4 -13  346.34   23.15
  -6   4  13  586.25   15.04
   6  -4 -13  618.15   59.57
   6   4 -13  615.70   63.47
   6   4  13  531.95   31.74
   6  -4  13  647.63   45.58
  -6  -4 -14  640.46   41.12
   6   4 -14  825.46   49.20
  -6   4 -14  476.95   31.53
  -6   4  14  877.24   54.01
   6  -4 -14  872.01   53.61
   6   4 -14  924.33   67.46
   6   4  14  784.34   49.43
   6  -4  14  947.40   60.50
  -6  -4 -15  348.79   23.52
   6   4 -15  430.85   25.38
  -6   4 -15  270.67   18.76
  -6   4  15  480.94   26.99
   6   4 -15  515.01   32.78
   6   4  15  444.33   27.51
   6  -4  15  493.30   55.51
  -6   4  15  458.02   28.33
  -6  -4 -16  148.01   20.96
  -6   4 -16  106.59   22.95
  -6   4  16  217.12   24.71
   6   4 -16  227.51   28.22
   6   4  16  194.62   24.72
   6  -4  16  173.14   26.55
  -6   4  16  198.11   24.33
  -6  -4 -17  440.70   31.14
  -6   4 -17  317.27   24.55
  -6   4  17  598.19   36.17
   6   4 -17  619.31   41.00
   6   4  17  534.98   34.86
   6  -4  17  624.77   41.89
  -6   4  17  557.58   34.18
  -6  -4 -18  292.09   37.28
  -6   4 -18  193.66   25.64
   6   4 -18  394.56   48.82
   6   4  18  328.68   41.16
   6  -4  18  382.26   62.48
  -6   4  18  330.64   39.96
  -6  -4 -19  452.41   41.51
  -6   4 -19  324.25   30.79
   6   4 -19  603.82   54.15
   6   4  19  543.78   48.35
   6  -4  19  610.95   54.46
  -6  -4 -20   32.72   26.37
  -6   4 -20   20.59   21.87
   6   4 -20   48.83   32.93
   6   4  20   34.95   30.92
   6  -4  20   39.42   37.36
  -6  -4 -21  409.72   49.28
  -6   4 -21  293.67   36.23
   6   4 -21  484.74   69.61
   6   4  21  446.44   53.18
   6  -4  21  548.25   65.48
   7   4   0    0.96    1.87
  -7   4   0   34.38   29.89
   7  -4   0   17.69   29.80
   7   4   0    1.24    2.57
   7   4   0    8.09   10.57
   7  -4   0    1.66    2.83
  -7   4   0    0.53    2.37
  -7  -4  -1 2336.02   39.06
   7   4  -1 2790.58   44.58
  -7   4  -1 2632.46   47.62
  -7   4   1 2914.84   72.65
   7  -4  -1 2621.05  100.53
   7   4  -1 2559.29   43.55
   7   4  -1 2116.19   43.23
   7  -4  -1 1745.14   29.07
   7  -4   1 2652.43   47.65
  -7   4   1 2510.11   41.02
  -7   4  -1 2801.05   44.86
  -7  -4  -2    6.55    3.13
   7   4  -2    8.21    5.36
   7   4   2    6.79    4.11
  -7   4  -2    8.38    5.32
   7  -4  -2   53.34   77.97
   7   4  -2    9.50    6.68
   7   4  -2   19.91   13.12
   7  -4  -2   -1.00    5.88
   7   4   2    5.64    8.51
   7  -4   2    8.49    4.10
  -7   4   2    6.66    4.14
  -7   4  -2    6.33    4.83
  -7  -4  -3 2391.61   40.77
   7   4  -3 2790.99   44.46
  -7   4  -3 2166.00   38.08
  -7   4   3 2772.82   47.17
   7  -4  -3 2554.52   43.47
   7   4  -3 2756.22   44.10
   7   4  -3 2638.91   46.25
   7  -4  -3 2263.79   37.46
   7   4   3 1841.81   33.83
   7   4  -4  259.31   28.70
  -7  -4  -4  193.44   23.00
  -7   4  -4  188.70   23.96
  -7   4   4  252.10   30.39
   7   4  -4  225.61   25.24
   7  -4  -4  228.41   25.52
   7   4  -4  238.63   27.88
   7  -4  -4  243.11   28.14
   7   4   4  157.08   19.12
  -7   4   4  156.04   17.36
   7  -4   4  255.82   29.18
   7   4  -5 2176.15   34.07
  -7  -4  -5 1683.67   31.81
  -7   4  -5 1628.11   37.45
   7   4  -5 1761.22   29.85
  -7   4   5 2303.38   39.93
   7  -4  -5 1930.76   32.53
   7  -4  -5 2299.12   36.45
   7   4  -5 2245.17   40.85
  -7   4   5 1266.87   20.88
   7   4   5 1364.43   26.97
  -7  -4  -6  256.14   21.71
  -7   4  -6  238.50   22.61
   7   4  -6  214.19   16.61
  -7   4   6  362.77   27.39
   7  -4  -6  293.04   22.40
  -7  -4   6  372.84   26.64
   7  -4  -6  396.40   29.41
   7   4  -6  355.17   27.29
  -7   4   6  277.43   20.05
   7   4   6  238.26   19.92
   7  -4   6  376.24   31.04
  -7  -4  -7 1476.35   34.28
  -7   4  -7 1303.67   29.86
   7   4  -7 1266.13   24.51
  -7   4   7 2101.06   41.43
  -7  -4   7 2091.98   39.40
   7  -4  -7 1646.25   32.81
   7  -4  -7 2307.50   46.13
   7   4  -7 2088.39   48.11
  -7   4   7 1835.58   35.56
   7   4   7 1510.57   33.72
   7  -4   7 2234.49   49.01
  -7   4   8  311.78   25.34
  -7  -4  -8  295.87   76.49
   7   4  -8  255.77   20.53
  -7   4  -8  253.41   22.31
  -7   4   8  432.58   35.90
  -7  -4   8  423.94   33.88
   7  -4  -8  441.44   35.51
   7   4  -8  421.40   35.22
  -7   4   8  401.86   32.26
   7   4   8  318.24   28.24
   7  -4   8  450.25   39.29
  -7   4   9  804.80   30.83
  -7  -4  -9  838.82   35.81
   7   4  -9  780.53   29.05
  -7   4  -9  717.25   30.31
  -7   4   9 1186.00   44.76
  -7  -4   9 1135.92   41.78
   7  -4  -9 1151.69   43.48
   7   4  -9 1135.43   44.85
  -7   4   9 1103.80   41.42
   7   4   9  925.91   41.77
   7  -4   9 1153.27   45.73
  -7  -4 -10  225.25  136.31
  -7   4  10  215.53   16.05
   7   4 -10  242.95   18.04
  -7   4 -10  202.87   18.49
  -7   4  10  347.57   26.92
  -7  -4  10  340.34   23.55
   7  -4 -10  359.73   26.76
   7   4 -10  344.36   27.61
  -7   4  10  335.20   23.82
   7   4  10  287.05   22.77
   7  -4  10  362.81   43.68
  -7  -4 -11  529.33   25.75
   7   4 -11  641.83   25.85
  -7   4 -11  473.12   25.15
  -7  -4  11  811.35   32.17
  -7   4  11  804.48   35.44
   7  -4 -11  838.39   40.09
   7   4 -11  816.24   18.41
   7   4  11  686.61   31.27
   7  -4  11  833.15   37.42
  -7  -4 -12    9.53    8.85
   7   4 -12    7.11    4.65
  -7   4 -12    3.09    6.16
  -7   4  12    6.91    5.85
   7  -4 -12    9.01    6.35
   7   4 -12    9.29    5.43
   7   4  12    9.27    5.12
   7  -4  12    7.53    8.78
  -7  -4 -13  455.29   41.65
   7   4 -13  586.98   35.09
  -7   4 -13  379.55   34.17
  -7   4  13  637.65   39.11
   7  -4 -13  664.07   44.89
   7   4 -13  675.63   48.43
   7   4  13  578.19   38.05
   7  -4  13  685.22   43.94
  -7  -4 -14  184.64   25.11
   7   4 -14  248.70   28.50
  -7   4 -14  161.20   21.04
  -7   4  14  256.26   29.08
   7  -4 -14  258.46   29.56
   7   4 -14  260.29   33.22
   7   4  14  232.68   28.95
   7  -4  14  283.20   34.93
  -7  -4 -15  498.63   30.77
  -7   4 -15  395.26   35.34
  -7   4  15  708.15   37.69
   7  -4 -15  701.12   38.52
   7   4 -15  726.64   41.59
   7   4  15  628.25   36.51
   7  -4  15  764.80   46.27
  -7  -4 -16  305.01   22.73
  -7   4 -16  262.44   20.18
   7   4 -16  462.56   33.51
   7   4  16  419.40   30.39
   7  -4  16  479.06   33.60
  -7   4  16  419.80   51.26
  -7  -4 -17  274.30   26.32
  -7   4 -17  207.94   28.73
   7   4 -17  379.97   49.79
   7   4  17  332.00   17.06
   7  -4  17  332.36   44.65
  -7   4  17  333.67   43.74
  -7  -4 -18  248.66   39.04
  -7   4 -18  177.28   30.20
   7   4 -18  334.99   42.47
   7   4  18  289.43   51.22
   7  -4  18  364.62   46.90
  -7  -4 -19  180.20   23.39
  -7   4 -19  121.79   32.43
   7   4 -19  234.60   28.55
   7   4  19  217.04   28.19
   7  -4  19  225.20   49.40
  -7  -4 -20  184.62   26.36
  -7   4 -20  132.05   19.94
   7   4 -20  239.96   32.60
   7   4  20  216.65   29.28
   7  -4  20  245.64   34.63
   8   4   0 3734.16   60.86
  -8   4   0 3623.24   58.96
   8  -4   0 2828.51   45.84
  -8   4   0 3445.55   54.41
  -8  -4  -1    0.97    2.85
   8   4  -1   -0.12    2.94
   8   4   1    1.38    2.74
  -8   4  -1   -0.23    4.17
  -8   4   1   -1.41    6.23
   8  -4  -1    2.31    4.58
   8   4  -1   -0.71    4.33
   8   4  -1    2.07    3.12
   8   4   1   -3.06    7.66
   8  -4  -1    0.42    1.78
   8  -4   1    1.53    2.74
  -8   4   1    1.03    1.88
  -8   4  -1   -0.44    3.29
  -8  -4  -2 1092.57   25.39
   8   4  -2 1254.04   22.38
  -8   4  -2 1034.71   20.94
  -8   4   2 1294.86   24.17
   8  -4  -2 1183.35   24.01
   8   4  -2 1245.13   21.94
   8   4  -2 1130.40   23.33
   8   4   2  903.60   19.91
   8  -4   2 1305.44   25.34
  -8   4   2  993.12   17.41
  -8   4  -2 1381.31   24.52
  -8  -4  -3  241.21   28.72
   8   4  -3  281.11   31.01
  -8   4  -3  248.54   32.77
  -8   4   3  316.30   36.37
   8  -4  -3  279.02   31.69
   8   4  -3  291.80   32.26
   8   4  -3  283.46   32.83
   8  -4  -3  219.27   24.63
   8   4   3  194.87   25.45
  -8   4   3  204.22   22.68
   8  -4   3  331.63   38.14
  -8  -4  -4  805.08   18.15
  -8   4  -4  766.53   18.31
  -8   4   4 1144.07   26.56
   8   4  -4  971.75   17.83
   8  -4  -4  991.73   18.20
   8  -4  -4 1049.21   20.48
   8   4  -4 1020.41   23.70
   8   4   4  748.91   22.84
  -8   4   4  745.48   13.58
   8  -4   4 1141.20   23.27
  -8  -4  -5  450.00   14.61
   8   4  -5  570.84   12.10
  -8   4  -5  455.28   15.25
  -8   4   5  623.43   17.51
   8   4  -5  479.92   10.52
   8  -4  -5  566.57   15.31
   8  -4  -5  652.49   14.85
   8   4  -5  690.10   19.62
  -8   4   5  378.91    9.14
   8   4   5  386.29   14.12
   8  -4   5  651.66   17.98
  -8  -4  -6  287.46   23.38
   8   4  -6  368.42   26.07
  -8   4  -6  296.30   23.62
   8   4  -6  238.44   17.03
  -8   4   6  419.28   30.30
   8  -4  -6  343.00   24.92
   8  -4  -6  423.47   30.55
   8   4  -6  395.06   30.15
  -8   4   6  277.66   20.35
   8   4   6  260.71   20.98
   8  -4   6  426.34   31.78
   8   4  -7  356.50   28.21
  -8  -4  -7  300.83   34.00
  -8   4  -7  242.35   21.63
   8   4  -7  237.00   18.86
  -8   4   7  378.37   30.83
   8  -4  -7  271.48   22.12
   8  -4  -7  372.40   30.21
   8   4  -7  341.08   29.30
  -8   4   7  289.61   23.52
   8   4   7  248.89   21.99
   8  -4   7  380.06   32.39
   8   4  -8 1086.04   39.57
  -8   4   8  747.15   28.69
  -8  -4  -8  674.37   40.82
   8   4  -8  744.65   27.26
  -8   4  -8  662.56   32.12
  -8   4   8 1102.79   41.83
   8  -4  -8 1139.35   42.93
   8   4  -8 1039.26   45.86
  -8   4   8  942.85   35.70
   8   4   8  791.12   36.03
   8  -4   8 1118.72   46.17
  -8   4   9   38.47    4.05
  -8  -4  -9   45.90   27.96
   8   4  -9   47.82    2.95
  -8   4  -9   49.06   25.40
  -8   4   9   64.96    4.55
  -8  -4   9   65.13    3.22
   8  -4  -9   65.42    8.01
   8   4  -9   62.93   19.25
  -8   4   9   58.61    4.23
   8   4   9   51.87    9.04
   8  -4   9   64.40   11.17
  -8  -4 -10  189.73   18.41
  -8   4  10  164.84   13.80
   8   4 -10  243.48   19.04
  -8   4 -10  146.23   16.68
  -8   4  10  299.89   24.98
  -8  -4  10  282.15   22.02
   8  -4 -10  301.41   24.60
   8   4 -10  290.81   25.18
  -8   4  10  265.17   22.70
   8   4  10  226.18   26.65
   8  -4  10  285.55   25.88
  -8  -4 -11   45.56   24.49
  -8   4  11   31.07    3.25
   8   4 -11   62.67    6.39
  -8   4 -11   42.41   29.42
  -8   4  11   65.60    4.72
   8  -4 -11   64.75    5.97
   8   4 -11   75.01   19.98
   8   4  11   65.22   14.72
   8  -4  11   67.19   23.52
  -8  -4 -12  208.09   26.23
   8   4 -12  371.62   35.27
  -8   4 -12  242.38   29.24
  -8   4  12  419.98   40.39
   8  -4 -12  400.24   39.38
   8   4 -12  422.95   42.67
   8   4  12  334.71   34.32
   8  -4  12  412.49   44.36
  -8  -4 -13  228.73   34.93
  -8   4 -13  200.17   25.62
  -8   4  13  328.53   36.65
   8  -4 -13  324.69   36.43
   8   4 -13  338.24   40.27
   8   4  13  277.78   33.08
   8  -4  13  337.11   39.57
  -8  -4 -14  156.74   23.08
  -8   4 -14  153.11   21.36
  -8   4  14  222.89   27.54
   8  -4 -14  233.68   30.68
   8   4 -14  257.28   33.14
   8   4  14  216.37   29.09
   8  -4  14  243.69   31.81
  -8  -4 -15  174.99   32.91
  -8   4 -15  168.24   24.59
   8  -4 -15  280.69   31.85
   8   4 -15  283.92   34.28
   8   4  15  231.83   28.67
   8  -4  15  286.83   42.59
  -8  -4 -16  333.22   24.79
  -8   4 -16  308.87   22.88
   8  -4 -16  469.81   34.63
   8   4 -16  525.64   35.44
   8   4  16  437.28   30.35
   8  -4  16  502.18   35.30
  -8  -4 -17  347.51   30.75
  -8   4 -17  296.54   25.11
   8   4 -17  496.39   25.44
   8   4  17  435.20   37.51
   8  -4  17  479.17   58.69
  -8  -4 -18   56.27   37.57
  -8   4 -18   45.65   19.17
   8   4 -18   88.03   11.56
   8   4  18   74.25   18.48
   8  -4  18   89.19   26.99
  -8  -4 -19  344.25   35.01
  -8   4 -19  291.30   30.10
   8   4 -19  444.02   62.57
   8   4  19  418.58   42.00
   8  -4  19  474.85   47.77
  -8  -4 -20   43.41   22.63
  -8   4 -20   31.57   28.17
   8   4 -20   62.75   37.04
   8   4  20   36.16   29.95
   8  -4  20   52.32   37.44
   9   4   0   -0.32    3.56
  -9   4   0   -1.39    4.14
   9   4   0   -1.58    4.44
   9   4   0   -1.41    6.49
   9  -4   0    3.00    3.80
  -9   4   0   -0.56    3.28
  -9  -4  -1 2317.80   46.23
   9   4  -1 2522.94   48.69
  -9   4  -1 2263.30   45.62
  -9   4   1 2724.25   53.62
   9   4  -1 2533.42   49.83
   9   4  -1 2034.84   43.17
   9   4   1 1852.94   46.10
   9  -4  -1 2024.09   41.24
   9  -4   1 2436.37   48.34
  -9   4   1 2208.91   43.05
  -9   4  -1 2589.92   50.81
  -9  -4  -2   -1.52    4.56
   9   4  -2   -0.38    8.82
  -9   4  -2   -0.13    3.75
  -9   4   2   -0.02    4.12
   9  -4  -2   -0.06    2.25
   9   4  -2   -0.54    3.37
   9   4  -2   -1.19    7.14
   9  -4  -2   -1.19    3.89
   9   4   2   -2.64    6.78
   9  -4   2    4.91    4.64
  -9   4   2   -0.47    2.51
  -9  -4  -3 1126.09   25.82
   9   4  -3 1155.85   23.09
  -9   4  -3 1067.61   27.14
  -9   4   3 1501.26   33.88
   9  -4  -3 1275.28   26.52
   9   4  -3 1256.75   25.47
   9   4  -3 1291.78   36.19
   9  -4  -3  972.94   21.31
   9   4   3 1066.29   25.30
  -9   4   3  916.75   19.12
   9  -4   3 1347.25   30.09
  -9  -4  -4  164.70   17.74
   9   4  -4  180.89   14.02
  -9   4  -4  176.05   17.08
  -9   4   4  238.03   18.09
   9  -4  -4  203.89   15.36
   9   4  -4  210.83   15.68
   9   4  -4  222.09   20.92
   9  -4  -4  210.74   15.98
   9   4   4  166.48   15.25
  -9   4   4  167.34   12.73
   9  -4   4  249.84   20.90
  -9  -4  -5  971.17   24.52
   9   4  -5 1111.27   21.52
  -9   4  -5  938.09   23.85
  -9   4   5 1382.00   29.38
   9   4  -5 1025.84   20.30
   9  -4  -5 1143.22   23.70
   9   4  -5 1293.09   37.94
   9  -4  -5 1344.34   27.80
   9   4   5  924.69   24.64
  -9   4   5  872.40   18.70
   9  -4   5 1413.42   39.66
  -9  -4  -6  205.62   21.32
   9   4  -6  262.96   20.85
  -9   4  -6  214.84   20.02
   9   4  -6  196.89   16.06
  -9   4   6  290.26   23.86
   9  -4  -6  240.36   19.77
   9  -4  -6  306.05   25.54
   9   4  -6  283.71   24.95
  -9   4   6  195.38   16.30
   9   4   6  194.19   18.31
   9  -4   6  308.34   29.47
  -9  -4  -7  343.53   40.05
  -9   4  -7  358.43   12.62
  -9   4   7  572.55   12.11
   9  -4  -7  450.95    7.88
   9  -4  -7  617.38    9.94
   9   4  -7  542.84   52.25
  -9   4   7  409.74   32.89
   9   4   7  382.86   32.71
   9  -4   7  592.42   18.80
  -9   4   8  242.33   17.42
  -9  -4  -8  212.50   39.01
  -9   4  -8  209.17   18.18
  -9   4   8  323.69   23.16
   9  -4  -8  328.97   24.66
   9   4  -8  307.14   24.35
  -9   4   8  255.59   18.40
   9   4   8  217.95   19.09
   9  -4   8  337.54   25.82
  -9   4   9  483.03   38.01
  -9  -4  -9  470.77   40.38
  -9   4  -9  481.29   23.73
  -9   4   9  764.56   12.69
   9  -4  -9  744.30   60.05
   9   4  -9  698.44   57.53
  -9   4   9  629.63   11.75
   9   4   9  558.32   47.70
   9  -4   9  777.60   17.41
  -9  -4 -10   12.78    8.93
  -9   4  10   51.17    5.95
  -9   4 -10   57.82   14.69
  -9   4  10   92.81   10.14
   9  -4 -10   97.50   11.40
   9   4 -10   91.67   16.85
   9   4  10   68.99   10.98
   9  -4  10   97.84   15.12
  -9  -4 -11  182.41   24.60
  -9   4 -11  168.91   19.73
  -9   4  11  302.22   29.85
   9  -4 -11  305.26   30.03
   9   4 -11  300.45   31.34
   9   4  11  246.13   26.52
   9  -4  11  292.79   31.18
  -9  -4 -12    0.86    5.98
  -9   4 -12    4.71    3.29
  -9   4  12    6.66    4.62
   9  -4 -12    5.86    4.86
   9   4 -12   10.10    5.38
   9   4  12    5.33    6.84
   9  -4  12    6.94    6.53
  -9  -4 -13  471.59   35.31
  -9   4 -13  485.79   44.31
   9  -4 -13  764.75   44.85
   9   4 -13  760.09   49.86
   9   4  13  640.84   40.93
   9  -4  13  787.04   48.57
  -9  -4 -14  122.46   28.03
  -9   4 -14  125.34   23.36
   9  -4 -14  166.24   20.94
   9   4 -14  184.40   25.55
   9   4  14  152.89   31.34
   9  -4  14  182.35   56.01
  -9  -4 -15  374.98   27.89
  -9   4 -15  375.83   27.59
   9  -4 -15  537.03   32.59
   9   4 -15  592.85   38.92
   9   4  15  493.33   35.65
   9  -4  15  603.53   40.71
  -9  -4 -16  205.26   40.70
  -9   4 -16  190.39   27.61
   9  -4 -16  285.78   36.64
   9   4 -16  317.91   42.26
   9   4  16  264.73   46.71
   9  -4  16  332.12   44.20
  -9  -4 -17  177.79   25.05
  -9   4 -17  177.73   24.60
   9   4 -17  280.26   36.26
   9   4  17  262.41   34.66
   9  -4  17  306.19   39.44
  -9  -4 -18  203.61   39.23
  -9   4 -18  210.78   26.19
   9   4 -18  314.80   40.51
   9   4  18  270.18   35.45
   9  -4  18  313.18   51.18
  -9  -4 -19   42.40   25.46
  -9   4 -19   42.14   31.04
   9   4 -19   82.06   12.69
   9   4  19   55.20   31.39
   9  -4  19   63.32   45.09
 -10  -4   0  982.83   22.24
  10   4   0 1100.66   25.08
 -10   4   0  980.71   22.56
  10   4   0  850.88   36.38
  10  -4   0  851.67   22.36
 -10  -4  -1    2.39    3.09
  10   4  -1   -1.66    4.63
 -10   4  -1    5.17    3.14
 -10   4   1    2.28    2.50
  10   4  -1    5.49    4.35
  10   4  -1   -3.00   13.19
  10   4   1   -0.21    7.55
  10  -4  -1    6.52    4.50
  10  -4   1    6.36    4.74
 -10   4   1    4.08    2.85
 -10  -4  -2 1620.44   34.97
  10   4  -2 1826.89   35.67
 -10   4  -2 1756.22   37.37
 -10   4   2 1941.94   42.93
  10   4  -2 1870.27   37.10
  10   4  -2 1581.65   40.82
  10  -4  -2 1564.45   32.72
  10  -4   2 1780.61   44.48
 -10   4   2 1455.48   30.99
 -10  -4  -3  257.56   27.94
  10   4  -3  305.72   24.68
 -10   4  -3  277.97   24.16
 -10   4   3  349.71   28.76
  10  -4  -3  284.77   23.85
  10   4  -3  310.53   27.05
  10   4  -3  267.60   25.42
  10  -4  -3  217.72   21.56
  10   4   3  277.39   24.74
  10  -4   3  340.22   28.77
 -10   4   3  267.90   22.61
 -10  -4  -4  484.22   20.94
  10   4  -4  547.83   20.85
 -10   4  -4  497.02   22.07
 -10   4   4  682.29   28.96
  10  -4  -4  563.89   24.91
  10   4  -4  582.34   22.23
  10   4  -4  579.07   25.21
  10  -4  -4  540.55   23.16
  10   4   4  497.45   26.03
 -10   4   4  488.20   20.21
  10  -4   4  699.70   31.98
 -10  -4  -5  116.68   21.42
  10   4  -5  145.87   12.11
 -10   4  -5  133.06   15.11
 -10   4   5  181.47   16.93
  10   4  -5  152.90   13.44
  10  -4  -5  154.08   13.09
  10   4  -5  159.95   15.88
  10  -4  -5  170.54   18.12
  10   4   5  108.38   16.38
 -10   4   5  133.95   11.63
  10  -4   5  184.41   17.28
 -10  -4  -6  500.49   21.38
  10   4  -6  426.20   15.00
 -10   4  -6  411.74   20.09
 -10   4   6  608.94   23.16
  10  -4  -6  464.41   20.12
  10  -4  -6  589.32   24.36
  10   4  -6  562.19   24.69
  10   4   6  404.26   19.64
 -10   4   6  378.40   15.92
  10  -4   6  603.21   31.66
 -10  -4  -7   39.95   19.86
 -10   4  -7   41.91    8.43
 -10   4   7   57.60    4.53
  10  -4  -7   38.47    5.26
  10  -4  -7   52.40   11.34
  10   4  -7   53.53   20.37
 -10   4   7   34.00    3.37
  10   4   7   47.37   25.92
  10  -4   7   60.32   19.76
 -10   4   8  119.56   12.13
 -10  -4  -8  109.61   18.62
 -10   4  -8  123.57   13.92
 -10   4   8  178.40   18.29
  10  -4  -8  179.94   18.43
  10   4  -8  172.60   19.98
 -10   4   8  133.72   13.71
  10   4   8  119.30   19.34
  10  -4   8  177.69   19.88
 -10   4   9    2.49    2.26
 -10  -4  -9   -2.35    7.40
 -10   4  -9    3.93    4.77
 -10   4   9    6.59    4.43
  10  -4  -9    7.89    5.26
  10   4  -9    2.50    3.89
  10   4   9    0.69    3.05
  10  -4   9    8.11    5.73
 -10  -4 -10  410.93   25.79
 -10   4 -10  503.18   32.36
 -10   4  10  746.06   43.37
  10  -4 -10  773.97   42.55
  10   4 -10  710.84   40.47
  10   4  10  565.55   33.39
  10  -4  10  761.16   45.70
 -10  -4 -11   15.70   14.10
 -10   4 -11   23.79   12.36
 -10   4  11   29.98    8.63
  10  -4 -11   25.31   13.70
  10   4 -11   24.43   12.11
  10   4  11   25.97   18.05
  10  -4  11   31.27   18.18
 -10  -4 -12  169.57   26.94
 -10   4 -12  176.07   23.92
  10  -4 -12  225.01   25.68
  10   4 -12  241.45   31.72
  10   4  12  198.04   25.60
  10  -4  12  241.31   29.54
 -10  -4 -13  138.29   24.83
 -10   4 -13  151.85   22.62
  10  -4 -13  218.32   28.63
  10   4 -13  220.07   34.19
  10   4  13  180.41   36.68
  10  -4  13  219.51   28.97
 -10  -4 -14  335.42   39.77
 -10   4 -14  341.55   27.11
  10  -4 -14  489.33   54.76
  10   4 -14  499.16   56.33
  10   4  14  411.18   31.60
  10  -4  14  509.60   58.76
 -10  -4 -15  205.75   31.87
 -10   4 -15  234.05   16.71
  10  -4 -15  322.93   42.52
  10   4 -15  309.01   52.39
  10   4  15  274.57   25.95
  10  -4  15  327.07   43.74
 -10  -4 -16   88.37   31.26
 -10   4 -16  110.62   28.53
  10   4 -16  141.43   15.00
  10   4  16  121.83   24.82
  10  -4  16  123.48   34.89
 -10  -4 -17  289.07   32.98
 -10   4 -17  309.37   27.81
  10   4 -17  428.94   39.40
  10   4  17  388.39   35.25
  10  -4  17  452.39   38.97
 -10  -4 -18  132.69   44.13
 -10   4 -18  125.20   28.18
  10   4 -18  186.92   30.82
  10   4  18  161.60   27.11
  10  -4  18  207.37   34.80
 -10  -4 -19  210.01   28.72
 -10   4 -19  218.38   30.38
  10   4 -19  293.12   36.90
  10   4  19  229.02   39.67
  10  -4  19  310.25   39.85
 -11  -4   0   -1.06    3.76
 -11   4   0    0.78    3.24
  11   4   0    2.58    2.17
  11  -4   0    1.37    2.19
 -11  -4  -1 1359.56   54.62
  11   4  -1 1428.97   53.10
 -11   4  -1 1583.19   59.91
 -11   4   1 1359.91   56.23
  11   4  -1 1329.54   50.33
  11   4  -1 1253.02   49.76
  11   4   1 1382.17   58.00
  11  -4  -1 1378.83   53.81
  11  -4   1 1252.61   49.55
 -11  -4  -2    2.49    6.69
  11   4  -2    2.27    2.45
 -11   4  -2   -0.97    5.03
 -11   4   2    0.87    3.70
  11   4  -2    1.52    2.60
  11   4  -2    5.49   10.84
  11  -4  -2    0.89    3.52
  11   4   2    2.62    5.66
  11  -4   2    4.76    3.53
 -11  -4  -3  920.98   41.22
  11   4  -3 1108.77   41.19
 -11   4  -3  997.48   43.59
 -11   4   3 1190.15   48.07
  11   4  -3 1125.89   42.16
  11   4  -3  951.95   41.21
  11  -4  -3  822.73   35.91
  11   4   3  869.39   36.37
  11  -4   3 1159.20   45.21
 -11  -4  -4   51.74   24.31
  11   4  -4   55.57    4.68
 -11   4  -4   65.75   13.69
 -11   4   4   63.06   11.23
  11  -4  -4   55.58    4.20
  11   4  -4   62.94    3.50
  11  -4  -4   57.85    8.75
  11   4  -4   57.57    8.08
  11   4   4   64.22   11.17
  11  -4   4   72.99    8.76
 -11   4   4   57.78    8.33
 -11  -4  -5  652.25   26.91
  11   4  -5  653.94   23.29
 -11   4  -5  664.80   29.95
 -11   4   5  859.13   32.36
  11   4  -5  666.25   23.79
  11  -4  -5  693.02   25.75
  11  -4  -5  789.23   29.77
  11   4  -5  793.11   40.52
  11   4   5  665.28   28.61
 -11   4   5  679.75   25.50
  11  -4   5  854.14   33.79
 -11  -4  -6   98.55   12.59
 -11   4  -6   76.42   14.12
 -11   4   6  114.37    9.25
  11  -4  -6   90.35    7.55
  11  -4  -6  115.32   10.14
  11   4  -6  112.26   17.85
  11   4   6   84.37   11.47
 -11   4   6   79.11    8.97
  11  -4   6  108.19   18.71
 -11  -4  -7  418.12   35.26
 -11   4  -7  455.07   26.62
 -11   4   7  597.38   46.88
  11  -4  -7  454.01   35.72
  11  -4  -7  624.95   49.47
  11   4  -7  587.61   48.22
  11   4   7  420.14   44.09
  11  -4   7  632.55   51.63
 -11  -4  -8   21.25   11.41
 -11   4  -8   25.50   19.50
 -11   4   8   34.01    4.37
  11  -4  -8   38.20    5.51
  11   4  -8   32.80   17.28
  11   4   8   28.78   14.46
  11  -4   8   38.74   26.18
 -11  -4  -9  144.67   17.29
 -11   4  -9  174.40   20.09
 -11   4   9  247.15   24.13
  11  -4  -9  249.16   24.72
  11   4  -9  232.37   35.91
  11   4   9  178.14   24.76
  11  -4   9  248.95   27.07
 -11  -4 -10   12.71   13.74
 -11   4 -10   19.38   13.30
 -11   4  10   20.51    5.70
  11  -4 -10   25.31    9.88
  11   4 -10   27.68   16.38
  11   4  10   25.20   13.53
  11  -4  10   28.90   17.31
 -11  -4 -11  148.68   20.40
 -11   4 -11  175.68   22.66
  11  -4 -11  248.83   28.22
  11   4 -11  244.89   29.47
  11   4  11  190.23   30.36
  11  -4  11  266.39   32.55
 -11  -4 -12   12.00   11.00
 -11   4 -12   12.79    8.62
  11  -4 -12   14.69   11.58
  11   4 -12   17.37    9.24
  11   4  12   12.54   12.45
  11  -4  12   13.13    7.01
 -11  -4 -13  279.44   33.77
 -11   4 -13  289.09   38.83
  11  -4 -13  414.21   45.53
  11   4 -13  420.58   48.52
  11   4  13  357.21   43.28
  11  -4  13  430.84   52.15
 -11  -4 -14   71.84   37.74
 -11   4 -14   76.41   29.95
  11  -4 -14  101.91   10.57
  11   4 -14  117.10   12.08
  11   4  14   94.95   33.33
  11  -4  14  115.41   34.50
 -11  -4 -15  289.23   41.36
 -11   4 -15  319.50   28.00
  11   4 -15  462.92   18.04
  11   4  15  376.34   32.81
  11  -4  15  473.35   20.23
 -11  -4 -16  109.41   35.49
 -11   4 -16  142.60   27.41
  11   4 -16  189.05   35.80
  11   4  16  157.58   27.60
  11  -4  16  205.45   27.24
 -11  -4 -17   99.98   25.66
 -11   4 -17  113.80   38.78
  11   4 -17  131.88   19.70
  11   4  17  132.05   26.33
  11  -4  17  141.31   35.41
 -11  -4 -18  235.73   31.94
 -11   4 -18  247.17   33.47
  11   4 -18  350.14   46.97
  11   4  18  283.48   37.08
  11  -4  18  348.08   48.60
 -12  -4   0  236.32   21.73
 -12   4   0  274.59   24.93
  12   4   0  257.77   21.47
  12  -4   0  254.22   19.97
 -12  -4  -1    5.12    6.14
  12   4  -1    9.04    5.87
 -12   4  -1   16.41   13.42
 -12   4   1   14.00    6.92
  12   4  -1   13.32    8.70
  12   4  -1   11.39    9.87
  12   4   1   13.52    8.43
  12  -4  -1   14.44    7.31
  12  -4   1   10.01    8.07
 -12  -4  -2  428.44   11.59
  12   4  -2  439.55   17.01
 -12   4  -2  414.49   19.40
 -12   4   2  441.22   18.65
  12   4  -2  508.47   19.85
  12   4  -2  397.71   14.27
  12  -4  -2  430.86   19.41
  12   4   2  484.68   29.74
  12  -4   2  425.40   19.30
 -12  -4  -3   15.08   16.67
  12   4  -3   29.11    2.77
 -12   4  -3   31.02   18.55
 -12   4   3   38.59   14.16
  12   4  -3   34.48    9.74
  12   4  -3   32.87   19.26
  12  -4  -3   26.81   18.98
  12   4   3   40.79   25.47
  12  -4   3   33.61   20.63
 -12  -4  -4  522.68   43.02
  12   4  -4  540.82   21.77
 -12   4  -4  527.44   25.50
 -12   4   4  629.57   26.52
  12   4  -4  589.54   23.84
  12   4  -4  550.58   29.45
  12  -4  -4  492.89   41.04
  12   4   4  547.83   27.04
  12  -4   4  630.40   30.93
 -12  -4  -5   18.19   14.66
 -12   4  -5   28.01   18.98
  12   4  -5   26.15    2.42
 -12   4   5   31.53    8.51
  12   4  -5   19.71    8.19
  12  -4  -5   20.20    5.67
  12  -4  -5   30.08    5.96
  12   4  -5   28.75   21.54
  12   4   5   27.37   13.99
  12  -4   5   35.62   24.10
 -12  -4  -6  127.46   26.57
 -12   4  -6  105.99   20.59
[truncated: 635,585 more chars]
