# Supplementary material
Source: MDPI journal article supplement (https://www.mdpi.com/2073-4344/9/10/846)
Supplement: s1 [file s1 › complex2e.cif]

data_shelx
_audit_creation_date               2018-07-31
_audit_creation_method
;
Olex2 1.2
(compiled May 18 2018 14:05:52 for OlexSys, GUI svn.r5506)
;
_shelx_SHELXL_version_number       '2018/3'
_audit_contact_author_address      ?
_audit_contact_author_email        ?
_audit_contact_author_name         ''
_audit_contact_author_phone        ?
_audit_update_record
;
????
;
_publ_contact_author_id_orcid      ?
_publ_section_references
;
Dolomanov, O.V., Bourhis, L.J., Gildea, R.J, Howard, J.A.K. & Puschmann, H.
 (2009), J. Appl. Cryst. 42, 339-341.

Sheldrick, G.M. (2015). Acta Cryst. A71, 3-8.

Sheldrick, G.M. (2015). Acta Cryst. C71, 3-8.
;
_chemical_name_common              ?
_chemical_name_systematic          ?
_chemical_formula_moiety          
 '2(C1 H29 C23 Ir N2 O2), 2 (Cl), C H4 O'
_chemical_formula_sum              'C47 H62 Cl4 Ir2 N4 O5'
_chemical_formula_weight           1289.20
_chemical_melting_point            ?
loop_
  _atom_type_symbol
  _atom_type_description
  _atom_type_scat_dispersion_real
  _atom_type_scat_dispersion_imag
  _atom_type_scat_source
 'C' 'C' 0.0033 0.0016 'International Tables Vol C Tables 4.2.6.8 and 6.1.1.4'
 'H' 'H' 0.0000 0.0000 'International Tables Vol C Tables 4.2.6.8 and 6.1.1.4'
 'Cl' 'Cl' 0.1484 0.1585 'International Tables Vol C Tables 4.2.6.8 and 6.1.1.4'
 'Ir' 'Ir' -1.4442 7.9887
 'International Tables Vol C Tables 4.2.6.8 and 6.1.1.4'
 'N' 'N' 0.0061 0.0033 'International Tables Vol C Tables 4.2.6.8 and 6.1.1.4'
 'O' 'O' 0.0106 0.0060 'International Tables Vol C Tables 4.2.6.8 and 6.1.1.4'

_shelx_space_group_comment
;
The symmetry employed for this shelxl refinement is uniquely defined
by the following loop, which should always be used as a source of
symmetry information in preference to the above space-group names.
They are only intended as comments.
;
_space_group_crystal_system        'orthorhombic'
_space_group_IT_number             62
_space_group_name_H-M_alt          'P n m a'
_space_group_name_Hall             '-P 2ac 2n'
loop_
  _space_group_symop_operation_xyz
 'x, y, z'
 '-x+1/2, -y, z+1/2'
 '-x, y+1/2, -z'
 'x+1/2, -y+1/2, -z+1/2'
 '-x, -y, -z'
 'x-1/2, y, -z-1/2'
 'x, -y-1/2, z'
 '-x-1/2, y-1/2, z-1/2'

_cell_length_a                     13.240(3)
_cell_length_b                     11.975(2)
_cell_length_c                     32.330(6)
_cell_angle_alpha                  90
_cell_angle_beta                   90
_cell_angle_gamma                  90
_cell_volume                       5125.9(18)
_cell_formula_units_Z              4
_cell_measurement_reflns_used      14426
_cell_measurement_temperature      143.0
_cell_measurement_theta_max        27.5
_cell_measurement_theta_min        3.0
_shelx_estimated_absorpt_T_max     0.812
_shelx_estimated_absorpt_T_min     0.219
_exptl_absorpt_coefficient_mu      5.442
_exptl_absorpt_correction_T_max    1.000
_exptl_absorpt_correction_T_min    0.706
_exptl_absorpt_correction_type     'Multi-scan'
_exptl_absorpt_process_details     'REQAB (Rigaku, 1998)'
_exptl_absorpt_special_details     ?
_exptl_crystal_colour              yellow
_exptl_crystal_colour_primary      yellow
_exptl_crystal_density_diffrn      1.671
_exptl_crystal_density_meas        ?
_exptl_crystal_density_method      ?
_exptl_crystal_description         plate
_exptl_crystal_F_000               2536
_exptl_crystal_preparation         ?
_exptl_crystal_recrystallization_method  ?
_exptl_crystal_size_max            0.2
_exptl_crystal_size_mid            0.2
_exptl_crystal_size_min            0.02
_exptl_transmission_factor_max     ?
_exptl_transmission_factor_min     ?
_diffrn_reflns_av_R_equivalents    0.0916
_diffrn_reflns_av_unetI/netI       0.0484
_diffrn_reflns_Laue_measured_fraction_full  0.997
_diffrn_reflns_Laue_measured_fraction_max  0.997
_diffrn_reflns_limit_h_max         17
_diffrn_reflns_limit_h_min         -15
_diffrn_reflns_limit_k_max         15
_diffrn_reflns_limit_k_min         -15
_diffrn_reflns_limit_l_max         41
_diffrn_reflns_limit_l_min         -41
_diffrn_reflns_number              40989
_diffrn_reflns_point_group_measured_fraction_full  0.997
_diffrn_reflns_point_group_measured_fraction_max  0.997
_diffrn_reflns_theta_full          25.242
_diffrn_reflns_theta_max           27.5
_diffrn_reflns_theta_min           3.077
_diffrn_ambient_temperature        143.0
_diffrn_detector                   CCD
_diffrn_detector_area_resol_mean   28.5714
_diffrn_detector_type              'Rigaku Saturn724+'
_diffrn_measured_fraction_theta_full  0.998
_diffrn_measured_fraction_theta_max  0.998
_diffrn_measurement_device         
;
AFC11 (Right): Eulerian 3 circle
;
_diffrn_measurement_device_type    'Rigaku Saturn724+ (2x2 bin mode)'
_diffrn_measurement_method         'profile data from \w-scans'
_diffrn_measurement_specimen_support  'Loop'
_diffrn_radiation_collimation      0.3
_diffrn_radiation_monochromator    'Graphite Monochromator'
_diffrn_radiation_probe            x-ray
_diffrn_radiation_type             MoK\a
_diffrn_radiation_wavelength       0.71075
_diffrn_source                     'Sealed Tube'
_diffrn_source_current             40.0
_diffrn_source_power               2.0
_diffrn_source_target              Mo
_diffrn_source_type                'Rotating Anode'
_diffrn_source_voltage             50.0
_diffrn_special_details            ?
_reflns_Friedel_coverage           0.000
_reflns_Friedel_fraction_full      .
_reflns_Friedel_fraction_max       .
_reflns_number_gt                  5744
_reflns_number_total               6136
_reflns_special_details
;
 Reflections were merged by SHELXL according to the crystal
 class for the calculation of statistics and refinement.
 
 _reflns_Friedel_fraction is defined as the number of unique
 Friedel pairs measured divided by the number that would be
 possible theoretically, ignoring centric projections and
 systematic absences.
;
_reflns_threshold_expression       'I > 2\s(I)'
_computing_cell_refinement        
 'CrystalClear-SM Expert 2.0 r7 (Rigaku, 2011)'
_computing_data_collection        
 'CrystalClear-SM Expert 2.0 r7 (Rigaku, 2011)'
_computing_data_reduction         
 'CrystalClear-SM Expert 2.0 r7 (Rigaku, 2011)'
_computing_molecular_graphics      'Olex2 (Dolomanov et al., 2009)'
_computing_publication_material    'Olex2 (Dolomanov et al., 2009)'
_computing_structure_refinement    'ShelXL (Sheldrick, 2015)'
_computing_structure_solution      'ShelXT (Sheldrick, 2015)'
_refine_diff_density_max           2.961
_refine_diff_density_min           -2.022
_refine_diff_density_rms           0.209
_refine_ls_extinction_coef         .
_refine_ls_extinction_method       none
_refine_ls_goodness_of_fit_ref     1.170
_refine_ls_hydrogen_treatment      constr
_refine_ls_matrix_type             full
_refine_ls_number_parameters       312
_refine_ls_number_reflns           6136
_refine_ls_number_restraints       0
_refine_ls_R_factor_all            0.0628
_refine_ls_R_factor_gt             0.0584
_refine_ls_restrained_S_all        1.170
_refine_ls_shift/su_max            0.001
_refine_ls_shift/su_mean           0.000
_refine_ls_structure_factor_coef   Fsqd
_refine_ls_weighting_details      
 'w=1/[\s^2^(Fo^2^)+(0.0456P)^2^+54.4270P] where P=(Fo^2^+2Fc^2^)/3'
_refine_ls_weighting_scheme        calc
_refine_ls_wR_factor_gt            0.1362
_refine_ls_wR_factor_ref           0.1387
_refine_special_details            ?
_olex2_refinement_description
;
1. Fixed Uiso
 At 1.2 times of:
  All C(H) groups, All C(H,H,H,H,H,H) groups
 At 1.5 times of:
  All C(H,H,H) groups, All O(H) groups
2. Others
 Sof(H00K)=Sof(H00L)=Sof(H00M)=0.5*(1-FVAR(2))
 Sof(H00G)=Sof(H00H)=Sof(H00I)=0.5*FVAR(2)
 Fixed Sof: H00V(0.40622) H00W(0.40622) H00X(0.40622) H00Y(0.09378) H(0.09378)
 HA(0.09378) H011(0.5) H9A(0.5) H9B(0.5) H9C(0.5)
3.a Aromatic/amide H refined with riding coordinates:
 C00J(H00J), C00N(H00N), C00P(H00P), C00Q(H00Q), C00U(H00U), C00X(H00Z)
3.b Disordered Me refined with riding coordinates:
 C00V(H00G,H00H,H00I,H00K,H00L,H00M), C00W(H00V,H00W,H00X,H00Y,H,HA)
3.c Idealised Me refined as rotating group:
 C00M(H00A,H00B,H00C), C00O(H00D,H00E,H00F), C00T(H00R,H00S,H00T), C00Y(H00,HB,
 HC), C00Z(H0AA,HD,HE), C010(H01A,H01B,H01C), C9(H9A,H9B,H9C)
3.d Idealised tetrahedral OH refined as rotating group:
 O008(H008), O00A(H00O), O011(H011)
;
_atom_sites_solution_hydrogens     geom
_atom_sites_solution_primary       dual
_atom_sites_solution_secondary     ?
loop_
  _atom_site_label
  _atom_site_type_symbol
  _atom_site_fract_x
  _atom_site_fract_y
  _atom_site_fract_z
  _atom_site_U_iso_or_equiv
  _atom_site_adp_type
  _atom_site_occupancy
  _atom_site_site_symmetry_order
  _atom_site_calc_flag
  _atom_site_refinement_flags_posn
  _atom_site_refinement_flags_adp
  _atom_site_refinement_flags_occupancy
  _atom_site_disorder_assembly
  _atom_site_disorder_group
 Ir01 Ir 0.70850(3) 0.250000 0.19941(2) 0.01785(12) Uani 1 2 d S T P . .
 Ir02 Ir 0.72279(3) 0.750000 0.42811(2) 0.02349(13) Uani 1 2 d S T P . .
 Cl03 Cl 0.8120(2) 0.250000 0.26090(8) 0.0235(5) Uani 1 2 d S T P . .
 Cl04 Cl 0.5483(2) 0.750000 0.40985(12) 0.0398(7) Uani 1 2 d S T P . .
 Cl05 Cl 0.6755(3) 0.250000 0.42721(11) 0.0399(7) Uani 1 2 d S T P . .
 Cl06 Cl 0.7227(3) 0.750000 0.20043(13) 0.0509(10) Uani 1 2 d S T P . .
 N2 N 0.8168(4) 0.3583(5) 0.17300(18) 0.0181(12) Uani 1 1 d . . . . .
 O008 O 0.7613(5) 0.5069(4) 0.20988(18) 0.0304(13) Uani 1 1 d . . . . .
 H008 H 0.765557 0.576777 0.210947 0.046 Uiso 1 1 calc GR . . . .
 N1 N 0.7409(5) 0.6423(5) 0.37767(19) 0.0257(14) Uani 1 1 d . . . . .
 O00A O 0.6787(5) 0.4952(4) 0.41282(19) 0.0327(13) Uani 1 1 d . . . . .
 H00O H 0.680635 0.425107 0.413299 0.049 Uiso 1 1 calc GR . . . .
 C00B C 0.5717(6) 0.1530(6) 0.1867(3) 0.0258(16) Uani 1 1 d . . . . .
 C15 C 0.5778(7) 0.250000 0.1592(3) 0.024(2) Uani 1 2 d S T P . .
 C16 C 0.5707(6) 0.3105(6) 0.2285(2) 0.0251(16) Uani 1 1 d . . . . .
 C00E C 0.8825(5) 0.3118(6) 0.1459(2) 0.0177(14) Uani 1 1 d . . . . .
 C14 C 0.8018(6) 0.6534(7) 0.4756(2) 0.0292(17) Uani 1 1 d . . . . .
 C00G C 0.8193(6) 0.4688(6) 0.1794(2) 0.0217(14) Uani 1 1 d . . . . .
 C00H C 0.8592(9) 0.750000 0.4634(3) 0.027(2) Uani 1 2 d S T P . .
 C00I C 0.7065(7) 0.6894(7) 0.4908(3) 0.037(2) Uani 1 1 d . . . . .
 C00J C 0.8805(6) 0.5382(6) 0.1549(3) 0.0287(17) Uani 1 1 d . . . . .
 H00J H 0.878240 0.617023 0.158243 0.034 Uiso 1 1 calc R . . . .
 C00K C 0.7793(6) 0.6882(6) 0.3423(2) 0.0255(16) Uani 1 1 d . . . . .
 C00L C 0.7229(6) 0.5318(6) 0.3787(2) 0.0257(16) Uani 1 1 d . . . . .
 C00M C 0.5585(7) 0.0324(7) 0.1746(3) 0.041(2) Uani 1 1 d . . . . .
 H00A H 0.616823 0.008041 0.158259 0.062 Uiso 1 1 calc GR . . . .
 H00B H 0.496852 0.024332 0.158043 0.062 Uiso 1 1 calc GR . . . .
 H00C H 0.553078 -0.013653 0.199542 0.062 Uiso 1 1 calc GR . . . .
 C00N C 0.9472(6) 0.3751(6) 0.1221(2) 0.0272(16) Uani 1 1 d . . . . .
 H00N H 0.992943 0.340676 0.103340 0.033 Uiso 1 1 calc R . . . .
 C00O C 0.5629(7) 0.3822(9) 0.2661(3) 0.042(2) Uani 1 1 d . . . . .
 H00D H 0.491618 0.391565 0.273507 0.063 Uiso 1 1 calc GR . . . .
 H00E H 0.592847 0.455371 0.260348 0.063 Uiso 1 1 calc GR . . . .
 H00F H 0.598972 0.346639 0.289016 0.063 Uiso 1 1 calc GR . . . .
 C00P C 0.8060(7) 0.6238(7) 0.3087(3) 0.0351(19) Uani 1 1 d . . . . .
 H00P H 0.833492 0.656956 0.284538 0.042 Uiso 1 1 calc R . . . .
 C00Q C 0.9436(6) 0.4910(7) 0.1262(3) 0.0306(18) Uani 1 1 d . . . . .
 H00Q H 0.984682 0.536992 0.109148 0.037 Uiso 1 1 calc R . . . .
 C00R C 0.9707(11) 0.750000 0.4487(4) 0.043(3) Uani 1 2 d S T P . .
 C00S C 0.5682(10) 0.250000 0.1126(3) 0.035(3) Uani 1 2 d S T P . .
 C00T C 0.8336(8) 0.5332(7) 0.4767(3) 0.045(2) Uani 1 1 d . . . . .
 H00R H 0.780849 0.488583 0.490050 0.067 Uiso 1 1 calc GR . . . .
 H00S H 0.896699 0.526196 0.492354 0.067 Uiso 1 1 calc GR . . . .
 H00T H 0.844142 0.506295 0.448392 0.067 Uiso 1 1 calc GR . . . .
 C00U C 0.7499(7) 0.4627(6) 0.3456(3) 0.0315(18) Uani 1 1 d . . . . .
 H00U H 0.739013 0.384388 0.347096 0.038 Uiso 1 1 calc R . . . .
 C00V C 0.4546(11) 0.250000 0.1034(4) 0.060(5) Uani 1 2 d S T P . .
 H00G H 0.443856 0.250000 0.073435 0.072 Uiso 0.95(18) 2 calc RS T P . .
 H00H H 0.423656 0.183183 0.115498 0.072 Uiso 0.47(9) 1 calc R . . . .
 H00I H 0.423656 0.316817 0.115498 0.072 Uiso 0.47(9) 1 calc R . . . .
 H00K H 0.416923 0.250000 0.129519 0.072 Uiso 0.05(18) 2 calc RS T P . .
 H00L H 0.437123 0.316817 0.087456 0.072 Uiso 0.03(9) 1 calc R . . . .
 H00M H 0.437123 0.183183 0.087456 0.072 Uiso 0.03(9) 1 calc R . . . .
 C00W C 1.0377(11) 0.750000 0.4872(4) 0.047(3) Uani 1 2 d S T P . .
 H00V H 1.108847 0.750000 0.478866 0.057 Uiso 0.8124 2 calc RS T P . .
 H00W H 1.023606 0.816817 0.503749 0.057 Uiso 0.4062 1 calc R . . . .
 H00X H 1.023606 0.683183 0.503749 0.057 Uiso 0.4062 1 calc R . . . .
 H00Y H 0.995192 0.750000 0.512043 0.057 Uiso 0.1876 2 calc RS T P . .
 H H 1.080433 0.683183 0.487160 0.057 Uiso 0.0938 1 calc R . . . .
 HA H 1.080433 0.816817 0.487161 0.057 Uiso 0.0938 1 calc R . . . .
 C00X C 0.7918(8) 0.5092(7) 0.3112(3) 0.038(2) Uani 1 1 d . . . . .
 H00Z H 0.811508 0.462802 0.288773 0.045 Uiso 1 1 calc R . . . .
 C00Y C 0.9951(8) 0.6466(10) 0.4214(3) 0.056(3) Uani 1 1 d . . . . .
 H00 H 0.993614 0.579030 0.438504 0.084 Uiso 1 1 calc GR . . . .
 HB H 1.062390 0.655296 0.409196 0.084 Uiso 1 1 calc GR . . . .
 HC H 0.944723 0.640283 0.399330 0.084 Uiso 1 1 calc GR . . . .
 C00Z C 0.6232(9) 0.6162(10) 0.5069(3) 0.056(3) Uani 1 1 d . . . . .
 H0AA H 0.640142 0.590670 0.534840 0.084 Uiso 1 1 calc GR . . . .
 HD H 0.615072 0.551394 0.488653 0.084 Uiso 1 1 calc GR . . . .
 HE H 0.559937 0.658646 0.507684 0.084 Uiso 1 1 calc GR . . . .
 C010 C 0.6183(8) 0.1477(10) 0.0921(3) 0.051(3) Uani 1 1 d . . . . .
 H01A H 0.689950 0.145190 0.099766 0.077 Uiso 1 1 calc GR . . . .
 H01B H 0.612121 0.153496 0.062017 0.077 Uiso 1 1 calc GR . . . .
 H01C H 0.584830 0.079423 0.101673 0.077 Uiso 1 1 calc GR . . . .
 O011 O 0.5060(10) 0.750000 0.2406(4) 0.101(6) Uani 1 2 d S T P . .
 H011 H 0.555461 0.732724 0.225658 0.152 Uiso 0.5 1 calc GR . . . .
 C9 C 0.5350(15) 0.750000 0.2810(6) 0.076(6) Uani 1 2 d S T P . .
 H9A H 0.565275 0.677678 0.287900 0.115 Uiso 0.5 1 calc GR . . A -1
 H9B H 0.475939 0.762889 0.298650 0.115 Uiso 0.5 1 calc GR . . A -1
 H9C H 0.584649 0.809434 0.285569 0.115 Uiso 0.5 1 calc GR . . A -1

loop_
  _atom_site_aniso_label
  _atom_site_aniso_U_11
  _atom_site_aniso_U_22
  _atom_site_aniso_U_33
  _atom_site_aniso_U_23
  _atom_site_aniso_U_13
  _atom_site_aniso_U_12
 Ir01 0.0206(2) 0.01231(18) 0.0207(2) 0.000 0.00156(14) 0.000
 Ir02 0.0321(2) 0.01162(19) 0.0268(2) 0.000 -0.00388(17) 0.000
 Cl03 0.0265(13) 0.0188(11) 0.0250(12) 0.000 -0.0026(10) 0.000
 Cl04 0.0331(16) 0.0174(13) 0.069(2) 0.000 -0.0058(15) 0.000
 Cl05 0.0448(18) 0.0142(12) 0.061(2) 0.000 -0.0134(15) 0.000
 Cl06 0.055(2) 0.0119(12) 0.085(3) 0.000 0.0257(19) 0.000
 N2 0.018(3) 0.010(2) 0.026(3) 0.004(2) 0.002(2) -0.001(2)
 O008 0.046(3) 0.011(2) 0.034(3) -0.003(2) 0.007(3) 0.002(2)
 N1 0.036(4) 0.015(3) 0.026(3) -0.004(2) -0.007(3) 0.002(3)
 O00A 0.042(3) 0.013(3) 0.043(3) -0.001(2) -0.005(3) -0.002(2)
 C00B 0.017(3) 0.020(4) 0.040(4) -0.001(3) 0.000(3) -0.004(3)
 C15 0.010(4) 0.035(6) 0.028(5) 0.000 -0.010(4) 0.000
 C16 0.020(4) 0.027(4) 0.029(4) -0.006(3) 0.006(3) 0.000(3)
 C00E 0.019(3) 0.016(3) 0.018(3) 0.003(2) -0.001(3) -0.002(3)
 C14 0.038(5) 0.023(4) 0.026(4) 0.004(3) -0.008(3) -0.001(3)
 C00G 0.021(3) 0.014(3) 0.031(4) 0.000(3) -0.001(3) -0.001(3)
 C00H 0.038(6) 0.020(5) 0.022(5) 0.000 -0.010(5) 0.000
 C00I 0.055(6) 0.028(5) 0.028(4) 0.008(3) 0.002(4) -0.004(4)
 C00J 0.027(4) 0.014(3) 0.044(5) 0.003(3) 0.005(3) -0.004(3)
 C00K 0.030(4) 0.020(4) 0.027(4) 0.001(3) -0.007(3) 0.001(3)
 C00L 0.030(4) 0.015(3) 0.032(4) -0.003(3) -0.011(3) -0.002(3)
 C00M 0.038(5) 0.022(4) 0.064(6) -0.011(4) 0.002(4) -0.004(4)
 C00N 0.027(4) 0.021(4) 0.034(4) 0.004(3) 0.009(3) 0.003(3)
 C00O 0.034(5) 0.051(6) 0.041(5) -0.019(4) 0.009(4) -0.005(4)
 C00P 0.046(5) 0.028(4) 0.031(4) -0.002(3) -0.006(4) 0.003(4)
 C00Q 0.027(4) 0.022(4) 0.043(5) 0.007(3) 0.010(4) -0.001(3)
 C00R 0.048(8) 0.057(9) 0.023(6) 0.000 -0.006(5) 0.000
 C00S 0.036(7) 0.051(8) 0.018(5) 0.000 0.001(5) 0.000
 C00T 0.066(7) 0.024(4) 0.044(5) 0.004(4) -0.018(5) 0.004(4)
 C00U 0.041(5) 0.014(3) 0.040(4) -0.008(3) -0.013(4) 0.000(3)
 C00V 0.034(8) 0.115(15) 0.030(7) 0.000 -0.008(6) 0.000
 C00W 0.034(7) 0.059(10) 0.048(8) 0.000 -0.007(6) 0.000
 C00X 0.052(6) 0.025(4) 0.037(5) -0.011(4) -0.009(4) 0.004(4)
 C00Y 0.045(6) 0.070(8) 0.053(6) -0.025(6) -0.005(5) 0.011(6)
 C00Z 0.066(7) 0.052(7) 0.050(6) 0.013(5) 0.009(5) -0.009(6)
 C010 0.057(6) 0.064(7) 0.033(5) -0.013(5) 0.003(4) -0.005(6)
 O011 0.048(8) 0.191(19) 0.065(9) 0.000 0.003(6) 0.000
 C9 0.070(13) 0.093(15) 0.067(12) 0.000 0.028(10) 0.000

_geom_special_details
;
 All esds (except the esd in the dihedral angle between two l.s. planes)
 are estimated using the full covariance matrix.  The cell esds are taken
 into account individually in the estimation of esds in distances, angles
 and torsion angles; correlations between esds in cell parameters are only
 used when they are defined by crystal symmetry.  An approximate (isotropic)
 treatment of cell esds is used for estimating esds involving l.s. planes.
;
loop_
  _geom_bond_atom_site_label_1
  _geom_bond_atom_site_label_2
  _geom_bond_distance
  _geom_bond_site_symmetry_2
  _geom_bond_publ_flag
 Ir01 Cl03 2.414(3) . ?
 Ir01 N2 2.114(6) 7_565 ?
 Ir01 N2 2.114(6) . ?
 Ir01 C00B 2.190(7) . ?
 Ir01 C00B 2.190(7) 7_565 ?
 Ir01 C15 2.163(9) . ?
 Ir01 C16 2.177(7) 7_565 ?
 Ir01 C16 2.177(7) . ?
 Ir02 Cl04 2.385(3) . ?
 Ir02 N1 2.093(6) . ?
 Ir02 N1 2.093(6) 7_575 ?
 Ir02 C14 2.189(8) . ?
 Ir02 C14 2.189(8) 7_575 ?
 Ir02 C00H 2.137(11) . ?
 Ir02 C00I 2.162(8) 7_575 ?
 Ir02 C00I 2.162(8) . ?
 N2 C00E 1.354(9) . ?
 N2 C00G 1.339(9) . ?
 O008 C00G 1.329(9) . ?
 N1 C00K 1.369(10) . ?
 N1 C00L 1.344(10) . ?
 O00A C00L 1.322(10) . ?
 C00B C15 1.464(10) . ?
 C00B C16 1.420(11) 7_565 ?
 C00B C00M 1.507(11) . ?
 C15 C00S 1.514(15) . ?
 C16 C16 1.450(15) 7_565 ?
 C16 C00O 1.490(11) . ?
 C00E C00E 1.481(13) 7_565 ?
 C00E C00N 1.379(10) . ?
 C14 C00H 1.438(11) . ?
 C14 C00I 1.421(13) . ?
 C14 C00T 1.500(12) . ?
 C00G C00J 1.406(10) . ?
 C00H C00R 1.551(19) . ?
 C00I C00I 1.452(17) 7_575 ?
 C00I C00Z 1.503(13) . ?
 C00J C00Q 1.372(11) . ?
 C00K C00K 1.479(15) 7_575 ?
 C00K C00P 1.376(11) . ?
 C00L C00U 1.400(11) . ?
 C00N C00Q 1.395(11) . ?
 C00P C00X 1.388(12) . ?
 C00R C00W 1.529(18) . ?
 C00R C00Y 1.555(12) . ?
 C00R C00Y 1.555(12) 7_575 ?
 C00S C00V 1.533(19) . ?
 C00S C010 1.542(12) . ?
 C00S C010 1.542(12) 7_565 ?
 C00U C00X 1.362(13) . ?
 O011 C9 1.36(2) . ?

loop_
  _geom_angle_atom_site_label_1
  _geom_angle_atom_site_label_2
  _geom_angle_atom_site_label_3
  _geom_angle
  _geom_angle_site_symmetry_1
  _geom_angle_site_symmetry_3
  _geom_angle_publ_flag
 N2 Ir01 Cl03 87.00(17) . . ?
 N2 Ir01 Cl03 87.00(17) 7_565 . ?
 N2 Ir01 N2 75.7(3) . 7_565 ?
 N2 Ir01 C00B 144.2(3) 7_565 7_565 ?
 N2 Ir01 C00B 99.2(3) 7_565 . ?
 N2 Ir01 C00B 144.2(3) . . ?
 N2 Ir01 C00B 99.2(3) . 7_565 ?
 N2 Ir01 C15 107.5(3) 7_565 . ?
 N2 Ir01 C15 107.5(3) . . ?
 N2 Ir01 C16 122.6(3) 7_565 7_565 ?
 N2 Ir01 C16 161.3(3) . 7_565 ?
 N2 Ir01 C16 122.6(3) . . ?
 N2 Ir01 C16 161.3(3) 7_565 . ?
 C00B Ir01 Cl03 128.6(2) . . ?
 C00B Ir01 Cl03 128.6(2) 7_565 . ?
 C00B Ir01 C00B 64.1(4) . 7_565 ?
 C15 Ir01 Cl03 161.5(3) . . ?
 C15 Ir01 C00B 39.3(3) . . ?
 C15 Ir01 C00B 39.3(3) . 7_565 ?
 C15 Ir01 C16 65.7(3) . . ?
 C15 Ir01 C16 65.7(3) . 7_565 ?
 C16 Ir01 Cl03 96.9(2) . . ?
 C16 Ir01 Cl03 96.9(2) 7_565 . ?
 C16 Ir01 C00B 64.2(3) 7_565 7_565 ?
 C16 Ir01 C00B 64.2(3) . . ?
 C16 Ir01 C00B 38.0(3) 7_565 . ?
 C16 Ir01 C00B 38.0(3) . 7_565 ?
 C16 Ir01 C16 38.9(4) 7_565 . ?
 N1 Ir02 Cl04 85.3(2) . . ?
 N1 Ir02 Cl04 85.3(2) 7_575 . ?
 N1 Ir02 N1 76.1(4) 7_575 . ?
 N1 Ir02 C14 99.6(3) 7_575 7_575 ?
 N1 Ir02 C14 144.8(3) . 7_575 ?
 N1 Ir02 C14 99.6(3) . . ?
 N1 Ir02 C14 144.8(3) 7_575 . ?
 N1 Ir02 C00H 108.7(3) 7_575 . ?
 N1 Ir02 C00H 108.7(3) . . ?
 N1 Ir02 C00I 122.3(3) 7_575 7_575 ?
 N1 Ir02 C00I 161.5(3) 7_575 . ?
 N1 Ir02 C00I 122.3(3) . . ?
 N1 Ir02 C00I 161.5(3) . 7_575 ?
 C14 Ir02 Cl04 129.6(2) . . ?
 C14 Ir02 Cl04 129.6(2) 7_575 . ?
 C14 Ir02 C14 63.8(4) . 7_575 ?
 C00H Ir02 Cl04 162.0(3) . . ?
 C00H Ir02 C14 38.8(3) . 7_575 ?
 C00H Ir02 C14 38.8(3) . . ?
 C00H Ir02 C00I 65.4(4) . 7_575 ?
 C00H Ir02 C00I 65.4(4) . . ?
 C00I Ir02 Cl04 97.8(3) 7_575 . ?
 C00I Ir02 Cl04 97.8(3) . . ?
 C00I Ir02 C14 38.1(3) . . ?
 C00I Ir02 C14 64.4(3) 7_575 . ?
 C00I Ir02 C14 38.1(3) 7_575 7_575 ?
 C00I Ir02 C14 64.4(3) . 7_575 ?
 C00I Ir02 C00I 39.2(5) 7_575 . ?
 C00E N2 Ir01 116.4(4) . . ?
 C00G N2 Ir01 124.1(5) . . ?
 C00G N2 C00E 119.4(6) . . ?
 C00K N1 Ir02 116.5(5) . . ?
 C00L N1 Ir02 124.5(6) . . ?
 C00L N1 C00K 118.9(7) . . ?
 C15 C00B Ir01 69.3(5) . . ?
 C15 C00B C00M 127.5(8) . . ?
 C16 C00B Ir01 70.5(4) 7_565 . ?
 C16 C00B C15 109.5(7) 7_565 . ?
 C16 C00B C00M 122.8(8) 7_565 . ?
 C00M C00B Ir01 130.8(6) . . ?
 C00B C15 Ir01 71.4(5) . . ?
 C00B C15 Ir01 71.4(5) 7_565 . ?
 C00B C15 C00B 105.0(9) 7_565 . ?
 C00B C15 C00S 126.8(5) . . ?
 C00B C15 C00S 126.8(5) 7_565 . ?
 C00S C15 Ir01 131.7(8) . . ?
 C00B C16 Ir01 71.5(4) 7_565 . ?
 C00B C16 C16 107.9(4) 7_565 7_565 ?
 C00B C16 C00O 126.8(8) 7_565 . ?
 C16 C16 Ir01 70.5(2) 7_565 . ?
 C16 C16 C00O 125.1(5) 7_565 . ?
 C00O C16 Ir01 127.0(6) . . ?
 N2 C00E C00E 114.3(4) . 7_565 ?
 N2 C00E C00N 122.3(6) . . ?
 C00N C00E C00E 123.3(4) . 7_565 ?
 C00H C14 Ir02 68.6(5) . . ?
 C00H C14 C00T 129.1(9) . . ?
 C00I C14 Ir02 69.9(5) . . ?
 C00I C14 C00H 108.6(8) . . ?
 C00I C14 C00T 122.2(8) . . ?
 C00T C14 Ir02 131.1(6) . . ?
 N2 C00G C00J 120.7(7) . . ?
 O008 C00G N2 116.1(6) . . ?
 O008 C00G C00J 123.2(7) . . ?
 C14 C00H Ir02 72.6(5) 7_575 . ?
 C14 C00H Ir02 72.6(5) . . ?
 C14 C00H C14 107.1(10) . 7_575 ?
 C14 C00H C00R 125.9(5) . . ?
 C14 C00H C00R 125.9(5) 7_575 . ?
 C00R C00H Ir02 129.8(8) . . ?
 C14 C00I Ir02 72.0(5) . . ?
 C14 C00I C00I 107.7(5) . 7_575 ?
 C14 C00I C00Z 126.5(8) . . ?
 C00I C00I Ir02 70.4(2) 7_575 . ?
 C00I C00I C00Z 125.7(6) 7_575 . ?
 C00Z C00I Ir02 126.4(7) . . ?
 C00Q C00J C00G 119.3(7) . . ?
 N1 C00K C00K 113.7(4) . 7_575 ?
 N1 C00K C00P 121.9(7) . . ?
 C00P C00K C00K 124.1(5) . 7_575 ?
 N1 C00L C00U 121.1(8) . . ?
 O00A C00L N1 115.2(7) . . ?
 O00A C00L C00U 123.7(7) . . ?
 C00E C00N C00Q 118.1(7) . . ?
 C00K C00P C00X 118.3(8) . . ?
 C00J C00Q C00N 119.7(7) . . ?
 C00H C00R C00Y 111.9(8) . 7_575 ?
 C00H C00R C00Y 111.9(8) . . ?
 C00W C00R C00H 107.6(10) . . ?
 C00W C00R C00Y 110.0(8) . . ?
 C00W C00R C00Y 110.0(8) . 7_575 ?
 C00Y C00R C00Y 105.6(12) . 7_575 ?
 C15 C00S C00V 106.0(10) . . ?
 C15 C00S C010 113.0(7) . . ?
 C15 C00S C010 113.0(7) . 7_565 ?
 C00V C00S C010 109.9(7) . . ?
 C00V C00S C010 109.9(7) . 7_565 ?
 C010 C00S C010 105.2(11) . 7_565 ?
 C00X C00U C00L 119.2(7) . . ?
 C00U C00X C00P 120.4(8) . . ?

_shelx_res_file
;
TITL shelx_a.res in Pnma
    shelx.res
    created by SHELXL-2018/3 at 10:10:56 on 31-Jul-2018
REM Old TITL shelx in Pmmb #51
REM SHELXT solution in Pnma: R1 0.103, Rweak 0.010, Alpha 0.059
REM <I/s> 1.636 for 344 systematic absences, Orientation a'=b, b'=a, c'=-c
REM Formula found by SHELXT: Ir2 Cl4 N5 O8 C44
CELL 0.71075 13.2397 11.9755 32.3296 90 90 90
ZERR 8 0.0026 0.0024 0.0064 0 0 0
LATT 1
SYMM 0.5-X,-Y,0.5+Z
SYMM -X,0.5+Y,-Z
SYMM 0.5+X,0.5-Y,0.5-Z
SFAC C H Cl Ir N O
UNIT 376 496 32 16 32 40

L.S. 30
PLAN  20
SIZE 0.2 0.2 0.02
TEMP -100.15
BOND
list 4
fmap 2
acta
REM <olex2.extras>
REM <HklSrc "%./shelx.hkl">
REM </olex2.extras>

WGHT    0.045600   54.427002
FVAR       0.11478   0.94758
IR01  4    0.708495    0.250000    0.199405    10.50000    0.02057    0.01231 =
         0.02065    0.00000    0.00156    0.00000
IR02  4    0.722794    0.750000    0.428109    10.50000    0.03206    0.01162 =
         0.02679    0.00000   -0.00388    0.00000
CL03  3    0.811970    0.250000    0.260896    10.50000    0.02653    0.01881 =
         0.02503    0.00000   -0.00257    0.00000
CL04  3    0.548280    0.750000    0.409845    10.50000    0.03312    0.01741 =
         0.06886    0.00000   -0.00578    0.00000
CL05  3    0.675480    0.250000    0.427206    10.50000    0.04483    0.01419 =
         0.06053    0.00000   -0.01344    0.00000
CL06  3    0.722674    0.750000    0.200435    10.50000    0.05533    0.01194 =
         0.08539    0.00000    0.02569    0.00000
N2    5    0.816776    0.358339    0.173005    11.00000    0.01812    0.01009 =
         0.02606    0.00395    0.00235   -0.00072
O008  6    0.761271    0.506854    0.209882    11.00000    0.04579    0.01116 =
         0.03420   -0.00251    0.00724    0.00167
AFIX 147
H008  2    0.765557    0.576777    0.210947    11.00000   -1.50000
AFIX   0

N1    5    0.740880    0.642263    0.377669    11.00000    0.03591    0.01476 =
         0.02637   -0.00377   -0.00716    0.00173
O00A  6    0.678710    0.495206    0.412819    11.00000    0.04194    0.01314 =
         0.04288   -0.00133   -0.00543   -0.00155
AFIX 147
H00O  2    0.680635    0.425107    0.413299    11.00000   -1.50000
AFIX   0

C00B  1    0.571728    0.152978    0.186709    11.00000    0.01704    0.02041 =
         0.03989   -0.00107   -0.00039   -0.00391
C15   1    0.577823    0.250000    0.159249    10.50000    0.00984    0.03453 =
         0.02794    0.00000   -0.01019    0.00000
C16   1    0.570690    0.310534    0.228503    11.00000    0.01966    0.02697 =
         0.02854   -0.00563    0.00594    0.00042
C00E  1    0.882479    0.311837    0.145916    11.00000    0.01871    0.01609 =
         0.01826    0.00318   -0.00075   -0.00153
C14   1    0.801842    0.653390    0.475605    11.00000    0.03783    0.02339 =
         0.02640    0.00426   -0.00768   -0.00117
C00G  1    0.819272    0.468777    0.179432    11.00000    0.02052    0.01351 =
         0.03113   -0.00033   -0.00073   -0.00138
C00H  1    0.859168    0.750000    0.463444    10.50000    0.03775    0.02044 =
         0.02176    0.00000   -0.01010    0.00000
C00I  1    0.706523    0.689393    0.490753    11.00000    0.05529    0.02831 =
         0.02762    0.00776    0.00169   -0.00408
C00J  1    0.880523    0.538241    0.154926    11.00000    0.02720    0.01438 =
         0.04448    0.00346    0.00495   -0.00375
AFIX  43
H00J  2    0.878240    0.617023    0.158243    11.00000   -1.20000
AFIX   0

C00K  1    0.779320    0.688237    0.342253    11.00000    0.02968    0.01965 =
         0.02728    0.00087   -0.00716    0.00076
C00L  1    0.722883    0.531819    0.378731    11.00000    0.03008    0.01529 =
         0.03177   -0.00318   -0.01144   -0.00172
C00M  1    0.558460    0.032385    0.174578    11.00000    0.03822    0.02217 =
         0.06360   -0.01113    0.00177   -0.00359
AFIX 137
H00A  2    0.616823    0.008041    0.158259    11.00000   -1.50000
H00B  2    0.496852    0.024332    0.158043    11.00000   -1.50000
H00C  2    0.553078   -0.013653    0.199542    11.00000   -1.50000
AFIX   0
C00N  1    0.947205    0.375077    0.122054    11.00000    0.02722    0.02052 =
         0.03374    0.00356    0.00891    0.00263
AFIX  43
H00N  2    0.992943    0.340676    0.103340    11.00000   -1.20000
AFIX   0
C00O  1    0.562862    0.382157    0.266058    11.00000    0.03396    0.05057 =
         0.04140   -0.01864    0.00875   -0.00538
AFIX 137
H00D  2    0.491618    0.391565    0.273507    11.00000   -1.50000
H00E  2    0.592847    0.455371    0.260348    11.00000   -1.50000
H00F  2    0.598972    0.346639    0.289016    11.00000   -1.50000
AFIX   0

C00P  1    0.806026    0.623805    0.308748    11.00000    0.04640    0.02799 =
         0.03085   -0.00173   -0.00554    0.00318
AFIX  43
H00P  2    0.833492    0.656956    0.284538    11.00000   -1.20000
AFIX   0

C00Q  1    0.943607    0.490986    0.126180    11.00000    0.02706    0.02216 =
         0.04267    0.00747    0.01034   -0.00115
AFIX  43
H00Q  2    0.984682    0.536992    0.109148    11.00000   -1.20000
AFIX   0

C00R  1    0.970663    0.750000    0.448714    10.50000    0.04828    0.05748 =
         0.02264    0.00000   -0.00647    0.00000
C00S  1    0.568192    0.250000    0.112576    10.50000    0.03616    0.05124 =
         0.01780    0.00000    0.00119    0.00000
C00T  1    0.833639    0.533198    0.476695    11.00000    0.06585    0.02412 =
         0.04385    0.00433   -0.01843    0.00443
AFIX 137
H00R  2    0.780849    0.488583    0.490050    11.00000   -1.50000
H00S  2    0.896699    0.526196    0.492354    11.00000   -1.50000
H00T  2    0.844142    0.506295    0.448392    11.00000   -1.50000
AFIX   0
C00U  1    0.749853    0.462703    0.345605    11.00000    0.04068    0.01429 =
         0.03953   -0.00769   -0.01265    0.00047
AFIX  43
H00U  2    0.739013    0.384388    0.347096    11.00000   -1.20000
AFIX   0

C00V  1    0.454599    0.250000    0.103427    10.50000    0.03449    0.11475 =
         0.03016    0.00000   -0.00805    0.00000
AFIX 123
H00G  2    0.443856    0.250000    0.073435    20.50000   -1.20000
H00H  2    0.423656    0.183183    0.115498    20.50000   -1.20000
H00I  2    0.423656    0.316817    0.115498    20.50000   -1.20000
H00K  2    0.416923    0.250000    0.129519   -20.50000   -1.20000
H00L  2    0.437123    0.316817    0.087456   -20.50000   -1.20000
H00M  2    0.437123    0.183183    0.087456   -20.50000   -1.20000
AFIX   0

C00W  1    1.037698    0.750000    0.487227    10.50000    0.03426    0.05949 =
         0.04793    0.00000   -0.00663    0.00000
AFIX 123
H00V  2    1.108847    0.750000    0.478866    10.40622   -1.20000
H00W  2    1.023606    0.816817    0.503749    10.40622   -1.20000
H00X  2    1.023606    0.683183    0.503749    10.40622   -1.20000
H00Y  2    0.995192    0.750000    0.512043    10.09378   -1.20000
H     2    1.080433    0.683183    0.487160    10.09378   -1.20000
HA    2    1.080433    0.816817    0.487161    10.09378   -1.20000
AFIX   0
C00X  1    0.791823    0.509152    0.311216    11.00000    0.05171    0.02466 =
         0.03653   -0.01112   -0.00944    0.00427
AFIX  43
H00Z  2    0.811508    0.462802    0.288773    11.00000   -1.20000
AFIX   0
C00Y  1    0.995106    0.646596    0.421413    11.00000    0.04535    0.06960 =
         0.05307   -0.02539   -0.00466    0.01076
AFIX 137
H00   2    0.993614    0.579030    0.438504    11.00000   -1.50000
HB    2    1.062390    0.655296    0.409196    11.00000   -1.50000
HC    2    0.944723    0.640283    0.399330    11.00000   -1.50000
AFIX   0
C00Z  1    0.623166    0.616154    0.506886    11.00000    0.06584    0.05159 =
         0.04990    0.01291    0.00886   -0.00879
AFIX 137
H0AA  2    0.640142    0.590670    0.534840    11.00000   -1.50000
HD    2    0.615072    0.551394    0.488653    11.00000   -1.50000
HE    2    0.559937    0.658646    0.507684    11.00000   -1.50000
AFIX   0

C010  1    0.618343    0.147707    0.092147    11.00000    0.05704    0.06381 =
         0.03276   -0.01299    0.00336   -0.00494
AFIX 137
H01A  2    0.689950    0.145190    0.099766    11.00000   -1.50000
H01B  2    0.612121    0.153496    0.062017    11.00000   -1.50000
H01C  2    0.584830    0.079423    0.101673    11.00000   -1.50000
AFIX   0

O011  6    0.506026    0.750000    0.240634    10.50000    0.04846    0.19067 =
         0.06492    0.00000    0.00306    0.00000
AFIX 147
H011  2    0.555461    0.732724    0.225658    10.50000   -1.50000
AFIX   0
C9    1    0.534998    0.750000    0.281012    10.50000    0.07022    0.09260 =
         0.06655    0.00000    0.02823    0.00000
PART -1
AFIX 137
H9A   2    0.565275    0.677678    0.287900    10.50000   -1.50000
H9B   2    0.475939    0.762889    0.298650    10.50000   -1.50000
H9C   2    0.584649    0.809434    0.285569    10.50000   -1.50000
AFIX   0
HKLF 4


REM  shelx_a.res in Pnma
REM wR2 = 0.1387, GooF = S = 1.170, Restrained GooF = 1.170 for all data
REM R1 = 0.0584 for 5744 Fo > 4sig(Fo) and 0.0628 for all 6136 data
REM 312 parameters refined using 0 restraints

END

WGHT      0.0457     54.4916

REM Highest difference peak  2.961,  deepest hole -2.022,  1-sigma level  0.209
Q1    1   0.6483  0.2500  0.2005  10.50000  0.05    2.96
Q2    1   1.2991  0.8118  0.4726  11.00000  0.05    2.28
Q3    1   0.6620  0.7500  0.4377  10.50000  0.05    2.11
Q4    1   0.7874  0.7500  0.4471  10.50000  0.05    1.70
Q5    1   0.9034  0.7500  0.4312  10.50000  0.05    1.65
Q6    1   1.3010  0.7801  0.4492  11.00000  0.05    1.65
Q7    1   0.7154  0.1984  0.2288  11.00000  0.05    1.53
Q8    1   0.7097  0.7500  0.1717  10.50000  0.05    1.43
Q9    1   0.7224  0.6966  0.4586  11.00000  0.05    1.39
Q10   1   0.7821  0.2500  0.2206  10.50000  0.05    1.38
Q11   1   0.7090  0.2170  0.1711  11.00000  0.05    1.32
Q12   1   0.7192  0.6958  0.3988  11.00000  0.05    1.32
Q13   1   0.7850  0.2500  0.4705  10.50000  0.05    1.29
Q14   1   0.7864  0.2500  0.1793  10.50000  0.05    1.26
Q15   1   0.7009  0.2500  0.4001  10.50000  0.05    1.26
Q16   1   0.7527  0.7500  0.3996  10.50000  0.05    1.17
Q17   1   0.9176  0.2500  0.2010  10.50000  0.05    1.17
Q18   1   0.8212  0.7807  0.4278  11.00000  0.05    1.12
Q19   1   0.5650  0.2500  0.2009  10.50000  0.05    1.10
Q20   1   0.8661  0.2500  0.2324  10.50000  0.05    0.94
;
_shelx_res_checksum                6301
_shelx_hkl_file
;
   0   0  -5    1.54    1.04
   0   0   5    3.12    2.06
   0   0   5    5.00    2.51
   0   0  -5    6.54    2.98
   0   0  -6   77.73    4.52
   0   0   6   87.63    4.27
   0   0   6   80.82    8.63
   0   0  -6   83.25    5.86
   0   0   7    3.91    2.19
   0   0   7    4.26    3.46
   0   0  -7    1.65    2.26
   0   0  -8 2052.23   26.92
   0   0   8 1982.97   25.79
   0   0   8 2023.63   28.82
   0   0  -8 2047.07   27.36
   0   0   9    5.47    2.95
   0   0  -9    1.20    2.38
   0   0 -10 1535.87   20.80
   0   0  10 1525.11   20.85
   0   0  10 1556.18   21.93
   0   0 -10 1565.16   23.14
   0   0  11    3.85    2.77
   0   0 -11    6.64    4.37
   0   0 -12  145.62    6.79
   0   0  12  163.43    9.26
   0   0  12  150.18    8.48
   0   0 -12  143.74    7.12
   0   0  13   -2.82    4.72
   0   0 -13    1.70    2.44
   0   0 -14  892.73   25.31
   0   0  14  881.91   25.06
   0   0  14  878.99   25.60
   0   0 -15    5.69    1.92
   0   0 -16  446.47   13.79
   0   0  16  448.72   15.30
   0   0  16  463.12   27.26
   0   0  17    4.17    2.47
   0   0  17   -5.37    7.18
   0   0 -18  880.96   25.63
   0   0  18  880.40   25.21
   0   0  18  935.74   28.02
   0   0  19   23.74    6.27
   0   0 -20    4.95    1.89
   0   0  20   16.80    4.86
   0   0 -22  991.18   31.07
   0   0  22 1156.33   35.54
   0   0  23    8.58    4.74
   0   0 -24   23.81    7.06
   0   0  24   20.88    8.21
   0   0  25    3.95    5.37
   0   0 -26  547.37   26.68
   0   0  26  609.35   38.83
   0   0  27    6.06    8.28
   0   0 -28   35.51   11.58
   0   0  28   51.18   10.88
   0   0 -29    2.38    3.08
   0   0  29    5.37    4.47
   0   0 -30  389.99   21.29
   0   0  30  468.93   26.78
   0   0 -31    7.28    3.11
   0   0  31   13.56    7.82
   0   0  32  166.25   14.56
   0   0  33   -0.32    4.05
   0   0  33    6.79    5.38
   0   0  34   13.40    5.51
   0   0  34    8.22    7.80
   0   0  35    6.21    3.31
   0   0  35    7.55    5.38
   0   0  36   82.40   18.84
   0   0  36   85.25   22.56
   0   0  37    3.29    3.93
   0   0  37    8.48    8.28
   0   0  38   75.27   18.46
   0   0  38   94.07   32.83
   0   0  39    4.27    3.09
   0   0  39    1.17    4.16
   0   0  40  341.48   21.26
  -1   0  -5  509.78   22.37
  -1   0   5  612.83   10.61
   1   0  -5  592.39    9.41
   1   0   5  598.25   10.19
  -1   0  -5  630.30   10.13
  -1   0  -6  422.49   40.49
   1   0   6  395.59    6.93
   1   0  -6  397.01    6.27
  -1   0   6  433.18    7.37
  -1   0   6  419.20    7.40
   1   0  -6  411.91    7.25
   1   0   6  448.27    8.97
  -1   0  -6  417.06   15.45
  -1   0  -7  166.93   10.36
   1   0   7  144.18   10.90
   1   0  -7  159.87    6.57
  -1   0   7  170.13    7.28
  -1   0   7  179.00   10.30
   1   0  -7  188.43    9.08
   1   0   7  184.42   12.61
  -1   0  -7  168.16    9.19
  -1   0  -8    3.53    3.08
   1   0   8    9.23    4.08
   1   0  -8    9.52    1.95
  -1   0   8    4.77    1.80
  -1   0   8    9.55    4.76
   1   0  -8    5.24    3.20
   1   0   8    8.61    4.23
  -1   0  -8    6.12    2.84
  -1   0  -9    4.99    6.98
   1   0  -9   11.92    2.34
   1   0   9   14.48    3.17
  -1   0   9   10.52    3.30
  -1   0   9    6.36    5.83
   1   0  -9    9.93    3.13
   1   0   9    9.24    2.95
  -1   0  -9   10.91    4.55
  -1   0 -10  243.59   10.56
   1   0 -10  256.01    9.92
   1   0  10  252.37   11.42
  -1   0  10  250.03    9.69
  -1   0  10  261.38   13.66
   1   0 -10  252.36   13.49
   1   0  10  248.17   10.36
  -1   0 -10  262.88   10.73
  -1   0 -11   47.99   12.50
   1   0  11   44.69    5.57
  -1   0  11   51.18    6.22
   1   0  11   45.35    4.45
   1   0 -11   36.72    8.25
  -1   0 -11   44.45    4.29
  -1   0 -12 1305.14   23.68
  -1   0  12 1281.85   19.86
  -1   0  12 1357.10   19.57
  -1   0 -12 1351.16   20.47
  -1   0 -13  280.66   17.35
  -1   0  13  241.47   23.78
  -1   0  13  290.44   62.55
   1   0  13  216.68   12.63
  -1   0 -13  249.33   15.31
   1   0  14 1011.43   28.61
  -1   0  14 1048.23   30.07
   1   0  14 1055.69   30.17
  -1   0 -15   26.37    4.84
   1   0 -15   12.24    8.20
   1   0  15   24.12    6.84
  -1   0  15   29.77    7.25
   1   0  15   29.31    9.03
  -1   0 -16   -0.57    3.41
   1   0 -16    2.61    1.74
   1   0  16   -0.74    2.77
  -1   0  16    1.62    2.45
  -1   0  16    3.57    3.90
   1   0  16    3.86    6.37
   1   0 -18 1765.29   48.47
   1   0  18 1819.40   50.71
  -1   0  19   13.81   10.24
  -1   0 -20   20.00    4.62
   1   0 -20   16.75    4.34
  -1   0  20   15.71    4.76
  -1   0  20   27.51    7.43
   1   0  20   10.96    4.52
  -1   0  21   58.30    5.73
  -1   0  21   80.28    8.41
   1   0  21   81.52   14.38
   1   0 -22  341.17   11.65
  -1   0 -23   86.29    8.09
   1   0  23   81.28    7.28
  -1   0 -24   93.98    6.60
  -1   0  24   92.15    9.74
   1   0  24   88.56   19.54
  -1   0  25   10.87    6.65
   1   0  25   11.92    5.26
  -1   0 -26  567.13   23.46
   1   0 -26  520.83   25.59
  -1   0  26  536.02   23.80
   1   0  26  535.03   23.32
   1   0 -28  128.66   13.16
  -1   0 -28  188.65   25.05
  -1   0  28  151.51   25.01
   1   0  28  178.30   22.11
   1   0 -29    4.62    3.13
  -1   0 -29    7.91    4.23
  -1   0  29   -0.39    3.52
  -1   0 -30   71.00   17.74
   1   0 -30   64.35    6.43
  -1   0  30   51.61   12.38
   1   0  30   58.08   19.00
   1   0 -31    2.95    1.96
  -1   0  31   -2.62    5.55
   1   0  31    2.30    7.83
  -1   0  32    9.38    6.13
   1   0  32   12.06    8.73
  -1   0  33   20.29    6.88
   1   0  33   32.10   11.71
   1   0  34  387.95   23.33
  -1   0  34  411.45   23.03
   1   0  34  382.68   23.90
   1   0  35   25.61    7.77
   1   0  35   30.48   14.60
  -1   0  35   28.21    8.95
   1   0  36  474.76   22.85
  -1   0  36  448.14   35.11
   1   0  36  472.20   23.23
  -1   0  37    7.11    5.63
   1   0  37   16.23    4.83
  -1   0  37    4.69    2.62
   1   0  37    6.68    7.91
   1   0  38    1.71    3.34
  -1   0  38   10.01    7.44
   1   0  38   14.80    7.88
   1   0  39    2.79    3.33
  -1   0  39    9.11    4.60
   1   0  39    3.97    8.77
   1   0  40   35.20   11.09
  -1   0  40   29.73   14.57
   1   0  40   40.13   23.33
   1   0  41    1.15    2.28
  -1   0  41    2.32    4.71
   1   0  41    5.32    5.35
   2   0   0 6641.66   82.90
  -2   0   0 8050.40  100.21
  -2   0  -1  332.77    6.64
   2   0  -1  332.35    6.31
   2   0   1  307.29   12.17
   2   0  -1  361.26    4.22
   2   0   1  369.72   13.96
  -2   0   1  405.79    8.93
   2   0  -1  373.42   14.53
   2   0   1  375.95   14.35
  -2   0  -2   74.53   10.79
   2   0   2   65.70    4.48
   2   0  -2   82.28    4.48
  -2   0   2   82.76    7.03
  -2   0   2   87.37    5.99
   2   0  -2   79.24    6.23
   2   0   2   79.53    5.08
  -2   0  -2   95.88    8.71
  -2   0  -3   37.97    7.30
   2   0   3   32.91    3.20
   2   0  -3   44.68    3.93
  -2   0   3   37.23    3.25
  -2   0   3   43.12    3.27
   2   0  -3   40.29    4.82
   2   0   3   36.99    3.54
  -2   0  -3   42.94    5.73
  -2   0  -4   44.45   11.39
   2   0   4   44.36    4.65
   2   0  -4   47.45    3.03
  -2   0   4   50.28    4.39
  -2   0   4   46.79    5.56
   2   0  -4   45.23    6.44
   2   0   4   49.69    5.69
  -2   0  -4   50.47    9.07
  -2   0  -5  406.44   13.60
   2   0  -5  487.89    6.84
  -2   0   5  489.91    7.32
   2   0  -5  469.21    8.83
   2   0   5  464.15   12.23
  -2   0  -5  492.42   11.79
  -2   0  -6   84.36    9.07
   2   0   6   74.97   10.38
   2   0  -6   89.86    5.43
  -2   0   6   96.28    4.56
  -2   0   6   99.00    5.95
   2   0  -6   91.81    9.70
   2   0   6   93.26    7.46
  -2   0  -6   90.04    9.46
  -2   0  -7  192.60   17.01
   2   0   7  191.38    8.25
   2   0  -7  237.26    9.30
  -2   0   7  239.78    8.96
  -2   0   7  234.46    9.60
   2   0  -7  220.48    9.27
   2   0   7  219.71    9.61
  -2   0  -7  225.71    9.24
   2   0  -8 3010.12   37.83
  -2   0   8 3324.64   41.77
  -2   0   8 3355.84   43.86
   2   0  -8 3191.04   41.34
   2   0   8 3233.28   44.33
  -2   0  -8 3281.46   42.95
   2   0   9 2100.53   29.37
  -2   0   9 2523.79   32.05
  -2   0   9 2477.51   33.62
   2   0  -9 2370.57   31.43
   2   0   9 2461.94   33.02
  -2   0  -9 2401.92   31.85
  -2   0 -10  484.42   22.86
   2   0  10  514.59   11.18
   2   0 -10  506.28   10.16
  -2   0  10  579.55    9.43
  -2   0  10  550.79   12.39
   2   0 -10  545.02    9.78
   2   0  10  557.75    9.94
  -2   0 -10  579.97    9.95
  -2   0 -11   -5.67    3.28
   2   0  11    2.76    1.83
   2   0 -11    1.72    1.28
  -2   0  11    1.59    2.02
  -2   0  11    2.53    1.71
   2   0 -11    1.82    2.74
   2   0  11    2.33    1.35
  -2   0 -11    2.72    1.98
  -2   0 -12   37.13   12.51
   2   0 -12   60.56    5.47
   2   0  12   65.43   13.08
  -2   0  12   55.14    4.21
  -2   0  12   70.98   16.50
   2   0 -12   54.63   11.10
   2   0  12   60.07    5.72
  -2   0 -12   49.83   15.00
  -2   0 -13   90.21    9.07
   2   0 -13   88.31    6.71
   2   0  13   93.42    6.60
  -2   0  13   99.11    7.78
  -2   0  13   91.25    8.28
   2   0 -13   90.21   11.57
   2   0  13  105.30    9.03
  -2   0 -13  109.05    9.00
  -2   0 -14  834.56   24.12
   2   0 -14  878.42   24.61
   2   0  14  836.08   25.34
  -2   0  14  857.17   23.69
  -2   0  14  918.91   26.79
   2   0  14  888.05   26.00
  -2   0 -15   89.96   22.95
  -2   0  15   77.30    4.47
   2   0 -16  421.65   12.46
  -2   0  16  377.34   23.01
  -2   0  16  405.98   10.51
   2   0  16  430.33   14.38
  -2   0 -17  180.07   14.96
   2   0 -17  175.32   14.27
  -2   0  17  148.44    9.89
  -2   0  17  160.05   14.68
   2   0  17  148.50   21.68
  -2   0  18  670.09   24.06
  -2   0  18  715.78   27.82
   2   0  18  738.82   27.35
  -2   0 -19   38.90    8.03
  -2   0  19    7.65    6.63
  -2   0  19   31.88    8.46
  -2   0 -20    5.64    3.44
   2   0 -20    3.94    2.08
  -2   0  20    2.71    1.16
  -2   0  20    2.63    3.83
   2   0  20    7.67    4.84
   2   0  21   32.85   17.14
   2   0  22 1476.72   43.40
   2   0  23   83.01   10.45
  -2   0 -24   23.45    5.50
  -2   0  24   12.33    5.29
   2   0  24   22.31    5.31
  -2   0 -25   23.03    4.81
  -2   0  25    5.98    5.32
   2   0  25   33.22    8.39
  -2   0 -26  267.94   12.88
   2   0 -26  277.67   10.35
  -2   0  26  265.73   15.27
   2   0  26  300.35   13.47
  -2   0 -27   52.88    9.99
  -2   0  27   51.67   12.51
   2   0  27   54.48   12.77
  -2   0 -28   -0.40    1.80
   2   0 -28   -0.20    2.93
  -2   0  28    6.60    3.71
   2   0  28    6.84    3.84
  -2   0 -29   55.09    9.18
   2   0 -29   63.03   15.35
  -2   0  29   42.38   10.10
   2   0  29   57.21    9.78
   2   0 -30  394.15   21.53
  -2   0  30  384.44   21.74
   2   0  30  389.09   32.70
  -2   0 -31  148.66   14.01
  -2   0  31  160.90   32.90
   2   0  31  165.55   32.55
  -2   0  32  125.92   28.60
   2   0  32  141.27   33.16
   2   0  33    3.90    4.88
  -2   0  33    9.53    3.59
  -2   0  33    5.40    4.54
  -2   0  34   30.64    8.30
   2   0  34   32.90   13.35
  -2   0  34   42.57   13.59
   2   0  34   31.42    9.32
   2   0  35    7.82    4.05
  -2   0  35    5.12    2.31
  -2   0  35    1.36    2.72
   2   0  36   37.64   10.68
  -2   0  36   46.90   14.13
   2   0  36   52.88   15.08
   2   0  37   14.17    8.76
  -2   0  37   35.00   10.84
   2   0  37   23.90    9.22
   2   0  38   44.72   15.89
  -2   0  38   68.81   31.89
   2   0  38   87.29   16.06
   2   0  39   55.43   19.37
  -2   0  39   66.02   11.49
   2   0  39   65.84   22.69
   2   0  40  188.69   25.97
  -2   0  40  224.77   15.49
   2   0  40  210.97   22.47
   2   0  41   12.31    7.28
  -2   0  41    0.24    4.90
   2   0  41    9.58    5.31
   3   0   0    1.42    1.55
   3   0   0    0.33    2.69
  -3   0   0    0.49    1.15
   3   0   0    5.69    2.76
   3   0  -1  525.34    9.11
   3   0   1  489.99    8.33
   3   0  -1  581.42   11.71
   3   0   1  566.35   11.37
   3   0   1  624.20    9.59
  -3   0   1  614.49   11.08
   3   0  -1  622.54   10.17
   3   0   1  629.92   10.10
  -3   0  -2 1680.75   24.09
   3   0  -2 1634.79   21.68
   3   0   2 1562.88   21.80
   3   0  -2 1837.98   23.88
  -3   0   2 1974.92   26.08
   3   0  -2 1993.69   25.99
   3   0   2 1985.43   25.72
  -3   0  -3  421.34   11.84
   3   0   3  414.01    7.24
   3   0  -3  500.60    8.84
  -3   0   3  458.79    7.58
  -3   0   3  549.37    9.34
   3   0  -3  528.53    8.60
   3   0   3  537.71    8.52
  -3   0  -3  534.79    8.63
  -3   0  -4 1139.71   17.62
   3   0   4 1046.48   15.76
   3   0  -4 1322.20   17.13
  -3   0   4 1233.45   16.26
  -3   0   4 1385.01   19.65
   3   0  -4 1335.10   18.17
   3   0   4 1372.72   18.64
  -3   0  -4 1365.80   18.64
  -3   0  -5 1376.63   19.60
   3   0   5 1296.55   18.04
   3   0  -5 1573.54   20.17
  -3   0   5 1517.00   19.34
  -3   0   5 1664.28   23.13
   3   0  -5 1589.43   21.74
   3   0   5 1641.34   22.72
  -3   0  -5 1679.00   22.38
  -3   0  -6 1075.90   15.71
   3   0   6  961.80   14.08
   3   0  -6 1189.64   15.42
  -3   0   6 1157.63   15.13
  -3   0   6 1243.53   17.31
   3   0  -6 1186.43   18.60
   3   0   6 1190.82   16.79
  -3   0  -6 1261.89   17.90
  -3   0  -7   26.36    4.75
   3   0   7   31.73    6.80
   3   0  -7   37.03    4.16
  -3   0   7   34.81    3.28
  -3   0   7   38.09    9.89
   3   0  -7   40.22    9.40
   3   0   7   41.31    5.08
  -3   0  -7   35.36    3.53
  -3   0  -8  478.47   14.54
   3   0   8  464.84    8.58
   3   0  -8  581.14    8.19
  -3   0   8  587.31    7.93
  -3   0   8  590.44   12.56
   3   0  -8  566.47   11.41
   3   0   8  584.40   10.51
  -3   0  -8  593.33   12.99
  -3   0  -9  665.31   10.89
   3   0   9  686.74   11.70
   3   0  -9  764.05   10.43
  -3   0   9  811.37   10.83
  -3   0   9  827.99   13.17
   3   0   9  752.26   13.73
  -3   0  -9  778.72   12.31
  -3   0 -10  208.39   12.22
   3   0  10  222.53   14.32
   3   0 -10  267.51   13.74
  -3   0  10  286.20   14.58
  -3   0  10  286.84   15.66
   3   0 -10  266.90   13.85
   3   0  10  282.81   21.45
  -3   0 -10  274.92   14.30
  -3   0 -11   57.11    6.04
   3   0  11   63.78   14.96
   3   0 -11   66.49    4.32
  -3   0  11   80.70    5.09
  -3   0  11   73.88   10.51
   3   0 -11   72.89    7.71
   3   0  11   79.87    8.63
  -3   0 -11   73.22   16.16
  -3   0  12  762.22   21.04
  -3   0  12  747.40   22.47
   3   0 -12  710.45   20.52
   3   0  12  732.86   24.97
  -3   0 -12  761.51   21.98
  -3   0  13 1661.22   45.17
  -3   0  13 1665.54   50.92
   3   0 -13 1515.74   42.63
   3   0  13 1580.51   46.30
  -3   0 -14  489.37   17.50
   3   0 -14  444.88   12.93
  -3   0  14  529.47   17.50
  -3   0  14  484.41   35.07
   3   0  14  499.14   16.90
  -3   0 -15    4.94    3.25
   3   0 -15    1.14    1.10
  -3   0  15    0.22    1.50
  -3   0  15    3.14    3.52
   3   0  15    3.95    4.18
  -3   0 -16    3.18    3.19
   3   0 -16    3.61    2.16
  -3   0  16    2.42    1.83
   3   0  16   10.01    5.94
  -3   0 -17  364.36   43.58
   3   0 -17  353.66   16.02
  -3   0  17  378.67   18.17
  -3   0  17  377.80   18.67
   3   0  17  410.25   19.37
   3   0 -18 1359.02   45.15
  -3   0  18 1316.34   44.10
  -3   0  18 1384.29   47.79
   3   0  18 1415.96   51.57
  -3   0 -19   30.54    9.30
  -3   0  19   31.81    6.16
  -3   0  19   28.88   13.45
   3   0  19   43.11   15.39
  -3   0 -20   70.26   17.26
   3   0 -20   61.87    8.52
  -3   0  20   54.14    5.92
  -3   0  20   66.69    7.29
   3   0  20   85.20   20.31
  -3   0 -21  380.46   16.80
  -3   0  21  364.97   14.14
   3   0  21  406.32   14.88
  -3   0  22  127.02    4.80
  -3   0  22  183.73   29.46
   3   0  22  203.81   24.01
   3   0 -23  169.26   13.90
  -3   0  23  115.60    3.48
  -3   0  23  172.60   17.12
  -3   0 -24   54.05   11.47
  -3   0  24   26.66    5.39
  -3   0  24   45.22    9.29
   3   0  24   51.66    9.62
  -3   0 -25  159.22   33.23
  -3   0  25  102.25    8.23
  -3   0  25  165.48   29.95
   3   0  25  182.48   18.75
   3   0 -26  327.61   11.48
  -3   0  26  274.70   10.61
  -3   0  26  314.10   13.88
   3   0  26  359.81   25.27
  -3   0 -27  440.43   22.04
  -3   0  27  477.82   28.02
  -3   0  28  230.88   13.12
   3   0  28  227.23   17.72
   3   0 -29   28.24    7.24
  -3   0  29   23.11    6.66
   3   0  29   44.78   10.25
  -3   0 -30   18.60    7.35
  -3   0  30   29.35    6.79
   3   0  30   -0.01    6.36
  -3   0  31   68.16   12.01
  -3   0  31   72.92   18.33
   3   0  31   71.34   19.54
   3   0  32   13.36    5.06
  -3   0  32   14.67    6.88
   3   0  32   12.99    3.85
   3   0  33    7.12    4.21
  -3   0  33    6.77    4.14
  -3   0  33    6.26    3.34
   3   0  33   13.45    9.51
   3   0  34  272.83   28.14
  -3   0  34  280.93   17.73
   3   0  34  310.26   29.29
   3   0  35  146.11   34.01
  -3   0  35  156.21   25.53
   3   0  35  141.84   14.42
   3   0  36  141.25   22.30
  -3   0  36  140.17   23.55
   3   0  36  138.16   37.43
   3   0  37    5.68    2.98
  -3   0  37    3.96    5.11
   3   0  37    7.11    6.59
   3   0  38   18.69    6.10
  -3   0  38   23.36   10.15
   3   0  38   22.37   10.14
   3   0  39    2.61    2.31
   3   0  39   12.78    5.51
   3   0  40   21.58    6.72
  -3   0  40   21.96    9.56
   3   0  40   15.28    8.57
   3   0  41    6.43    3.69
  -3   0  41    3.81    3.21
   3   0  41    4.38    4.88
   4   0   0 2916.10   38.21
   4   0   0 3226.00   41.46
  -4   0   0 3692.17   47.49
   4   0   0 3492.91   44.25
   4   0  -1   36.45    7.81
   4   0   1   38.15    8.94
   4   0  -1   47.41    8.07
   4   0   1   43.19    9.73
   4   0   1   41.67    7.17
  -4   0   1   45.68    9.14
   4   0  -1   43.33    4.99
   4   0   1   50.30    8.09
   4   0  -2  120.53    7.11
   4   0   2  118.66   10.25
   4   0  -2  142.35    6.61
   4   0   2  124.54    6.45
   4   0   2  151.78    6.60
  -4   0   2  151.37    6.60
   4   0  -2  144.72    7.55
   4   0   2  151.15    6.29
  -4   0  -3 1128.33   19.36
   4   0  -3 1075.72   14.74
   4   0   3  991.41   14.43
   4   0  -3 1184.22   17.04
  -4   0   3 1338.12   19.15
   4   0  -3 1300.23   17.81
   4   0   3 1336.20   18.75
  -4   0  -4   17.49    5.20
   4   0   4   14.55    3.70
   4   0  -4   19.02    3.93
  -4   0   4   25.55    5.77
   4   0  -4   20.83    4.25
   4   0   4   17.04    4.46
  -4   0  -4   24.08    6.53
  -4   0  -5   41.34    9.47
   4   0   5   24.91    5.21
   4   0  -5   37.74    4.53
  -4   0   5   35.09    4.33
  -4   0   5   34.08    4.99
   4   0  -5   37.23    7.30
   4   0   5   40.22   10.10
  -4   0  -5   39.38    8.07
  -4   0  -6  367.89   11.10
   4   0   6  357.61    7.18
   4   0  -6  449.22    6.86
  -4   0   6  423.80    6.37
  -4   0   6  486.85    8.67
   4   0  -6  449.98    9.79
   4   0   6  473.57    8.47
  -4   0  -6  473.73    8.79
  -4   0  -7   78.86   18.98
   4   0   7   66.54    5.98
   4   0  -7   79.07    3.92
  -4   0   7   79.42    3.90
  -4   0   7   90.90    9.69
   4   0  -7   71.33    6.64
   4   0   7   83.07    4.67
  -4   0  -7   89.25    5.10
  -4   0  -8  750.04   21.73
   4   0   8  682.32   19.62
   4   0  -8  893.26   24.74
  -4   0   8  830.62   22.71
  -4   0   8  938.66   27.24
   4   0  -8  862.87   23.92
   4   0   8  838.10   24.13
  -4   0  -8  872.85   25.04
   4   0   9 1277.64   36.32
   4   0  -9 1445.73   38.92
  -4   0   9 1459.03   39.15
  -4   0   9 1607.34   44.10
   4   0  -9 1489.04   40.66
   4   0   9 1553.76   44.01
  -4   0  -9 1584.65   43.35
   4   0 -10  319.39   15.95
  -4   0  10  321.56   15.96
  -4   0  10  333.24   17.68
   4   0 -10  305.22   16.10
   4   0  10  316.82   16.61
  -4   0 -10  346.78   78.09
  -4   0 -11   29.53   13.70
   4   0 -11   72.39    4.82
  -4   0  11   71.51    5.09
  -4   0  11   85.03   13.91
   4   0 -11   75.47    5.12
   4   0  11   84.36    7.09
  -4   0 -11   71.62    8.73
  -4   0 -12   33.69   33.80
   4   0 -12   52.74    3.69
  -4   0  12   94.81   18.24
  -4   0  12   59.77    7.18
   4   0 -12   52.93   15.93
   4   0  12   62.02    5.36
  -4   0 -12   60.04   10.78
   4   0 -13 1360.31   37.03
  -4   0  13 1695.85   56.52
  -4   0  13 1580.49   46.28
   4   0 -13 1466.72   42.20
   4   0  13 1545.51   43.67
  -4   0 -14  471.03   43.22
   4   0 -14  445.52   13.08
  -4   0  14  508.27   18.82
   4   0  14  520.85   17.08
  -4   0 -15   55.91   20.88
   4   0 -15   50.34    4.39
  -4   0  15  100.93   12.63
  -4   0  15   71.63   18.01
   4   0  15   60.79   15.43
  -4   0 -16  307.89   18.52
   4   0 -16  287.77   12.68
  -4   0  16  320.43   14.29
  -4   0  16  332.91   15.56
   4   0  16  336.19   28.67
  -4   0 -17  788.48   29.80
   4   0 -17  769.40   26.10
  -4   0  17  883.35   29.63
  -4   0  17  833.87   29.31
   4   0  17  828.96   30.71
  -4   0 -18  154.53   12.03
  -4   0  18  144.79    6.33
  -4   0  18  160.80   45.28
   4   0  18  152.38   14.74
  -4   0 -19   69.15   14.81
   4   0 -19   49.97    4.23
  -4   0  19   56.10    6.14
  -4   0  19   52.44    9.86
   4   0  19   63.14   13.55
  -4   0 -20   34.95    5.87
   4   0 -20   21.36    3.97
  -4   0  20   24.10    4.88
  -4   0  20   24.42    9.72
  -4   0 -21  362.94   17.62
  -4   0  21  323.79    9.17
  -4   0  21  389.26   19.49
   4   0  21  371.62   26.34
  -4   0 -22  514.74   23.45
  -4   0  22  508.65   20.85
  -4   0  22  552.99   25.09
  -4   0  23  455.10   17.88
  -4   0  23  504.32   24.83
   4   0  23  541.30   23.50
  -4   0 -24   24.97    5.92
  -4   0  24   25.18    5.28
   4   0  24   60.95   14.44
  -4   0 -25   47.65    8.33
  -4   0  25   27.76    6.20
  -4   0  25   48.25    9.73
   4   0  25   58.97    9.94
  -4   0 -26  136.02   26.74
  -4   0  26   73.12    9.39
  -4   0  26  111.85   11.03
   4   0  26  134.70   24.70
  -4   0 -27   85.34   20.09
  -4   0  27   87.04   19.90
   4   0  27   82.21   17.99
  -4   0 -28   -0.69    4.97
  -4   0  28   13.65    6.51
   4   0  28    6.22    5.03
  -4   0 -29   38.16    9.40
  -4   0  29   28.72    7.63
  -4   0  29   28.55    7.60
   4   0  29   35.58   10.39
  -4   0  30  114.31   16.43
   4   0  30  135.94   12.99
   4   0  31  391.22   36.14
  -4   0  31  400.15   22.69
   4   0  32   54.40   21.21
  -4   0  32   76.19   17.00
   4   0  33   13.01    5.03
  -4   0  33    8.74    8.83
   4   0  33    9.28    9.70
   4   0  34   53.33   11.50
  -4   0  34   46.16   11.27
   4   0  34   67.27   13.80
   4   0  35    8.07    6.13
  -4   0  35   14.04    7.43
   4   0  36   47.47   16.49
  -4   0  36   44.64   12.00
   4   0  36   30.53    8.33
   4   0  37   17.32    7.60
  -4   0  37   26.46    9.14
   4   0  37   21.80    9.68
   4   0  38   11.02    5.87
  -4   0  38    7.33    6.06
   4   0  38    5.77    4.87
   4   0  39  343.10   21.99
  -4   0  39  305.76   38.51
   4   0  39  330.10   28.57
   4   0  40   70.99   21.07
  -4   0  40   93.71   31.27
   5   0   0    0.49    1.44
   5   0   0   -0.88    2.60
  -5   0   0    0.70    1.15
   5   0   1  140.20    7.26
   5   0  -1  143.71    6.74
   5   0  -1  169.96   11.83
   5   0   1  170.48    7.71
  -5   0   1  188.73    8.33
   5   0   1  176.43    7.35
   5   0  -1  187.39    8.01
   5   0   1  189.34    9.97
   5   0  -2  120.97    8.19
   5   0   2  118.95    6.84
   5   0  -2  140.16    8.34
   5   0   2  139.76   10.37
   5   0   2  151.99    8.40
  -5   0   2  158.04   10.38
   5   0  -2  144.37    7.56
   5   0   2  161.87   10.27
   5   0  -3  579.85   17.00
   5   0   3  592.41   17.24
   5   0  -3  721.96   20.85
   5   0   3  672.53   19.85
   5   0   3  741.70   20.66
  -5   0   3  779.66   22.43
   5   0  -3  762.90   21.18
   5   0   3  766.86   21.59
   5   0  -4  581.74   17.51
   5   0   4  584.58   17.56
   5   0  -4  707.81   20.54
   5   0   4  617.44   18.16
   5   0   4  776.82   21.83
  -5   0   4  788.03   23.36
   5   0  -4  753.76   21.86
   5   0   4  761.86   21.93
   5   0  -5 2635.27   70.61
  -5   0  -5 2809.08   76.16
   5   0   5 2451.17   68.38
   5   0  -5 3118.14   83.44
  -5   0   5 3340.54   89.64
   5   0  -5 3278.46   88.04
   5   0   5 3304.76   88.67
  -5   0  -5 3333.12   89.60
   5   0  -6  243.70   12.52
  -5   0  -6  264.78   16.73
   5   0   6  227.21   12.99
   5   0  -6  294.40   15.41
  -5   0   6  308.14   16.49
   5   0  -6  311.23   15.82
   5   0   6  301.89   15.73
  -5   0  -6  316.82   16.46
  -5   0  -7   21.96    7.00
   5   0   7   14.20    4.17
   5   0  -7   18.55    3.76
  -5   0   7   24.39    4.33
   5   0  -7   16.59    4.78
   5   0   7   25.73    7.61
  -5   0  -7   18.46    4.21
  -5   0  -8   30.40    9.58
   5   0  -8   33.25    5.31
  -5   0   8   28.32    3.81
  -5   0   8   43.79    8.00
   5   0  -8   30.33    6.83
   5   0   8   34.14   10.17
  -5   0  -8   34.03    9.51
  -5   0  -9  331.79   12.82
   5   0  -9  359.13   10.69
  -5   0   9  332.24    9.64
  -5   0   9  398.48   19.86
   5   0  -9  344.36   77.58
   5   0   9  362.92   14.11
  -5   0  -9  384.32   13.26
  -5   0 -10  402.53   11.22
   5   0 -10  432.16   26.40
  -5   0  10  402.71    4.94
  -5   0  10  484.91    7.53
   5   0 -10  421.74   25.87
   5   0  10  439.71   15.88
  -5   0 -10  452.25   28.82
  -5   0 -11   23.67   10.98
   5   0 -11   31.07    5.01
  -5   0  11   28.77    3.93
  -5   0  11   37.63    8.05
   5   0 -11   24.24    6.68
   5   0  11   31.48    6.70
  -5   0 -11   34.08    7.51
  -5   0 -12  259.88   17.45
   5   0 -12  326.72   19.78
  -5   0  12  321.65   19.52
  -5   0  12  374.14   24.03
   5   0 -12  333.08   20.70
   5   0  12  350.87   27.76
   5   0 -13 1001.82   27.16
  -5   0  13 1031.97   27.96
  -5   0  13 1143.81   33.60
   5   0  13 1082.30   31.28
  -5   0 -14  161.03   14.06
   5   0 -14  179.14    7.89
  -5   0  14  201.09    8.81
  -5   0  14  218.22   11.55
   5   0  14  201.96   10.47
  -5   0 -15   60.51    4.93
   5   0 -15   75.12    3.29
  -5   0  15   85.23    4.38
  -5   0  15   97.98    8.71
   5   0  15   99.02   20.74
  -5   0 -16    7.35    5.09
   5   0 -16   -0.13    0.66
  -5   0  16    1.77    0.96
   5   0  16    3.93    2.61
  -5   0 -17  374.13   27.23
   5   0 -17  429.91   12.24
  -5   0  17  484.47   13.78
  -5   0  17  509.10   20.31
   5   0  17  467.60   22.81
  -5   0 -18  101.76   14.42
  -5   0  18   96.48    3.56
  -5   0  18  115.27   16.45
   5   0  18   99.98   10.83
  -5   0 -19  131.56   16.05
  -5   0  19  169.92   11.11
  -5   0  19  143.46    9.50
   5   0  19  136.98   11.32
  -5   0 -20    9.83    6.12
  -5   0  20    9.33    2.07
  -5   0  20   14.31    6.21
   5   0  20   13.36    3.79
  -5   0 -21  663.82   35.31
  -5   0  21  728.86   27.86
  -5   0  21  707.66   33.05
   5   0  21  671.12   28.06
  -5   0 -22   24.17   11.35
  -5   0  22   22.21    5.54
  -5   0  22   21.59   11.06
   5   0  22   32.38    8.86
   5   0 -23  338.45   13.68
  -5   0 -23  356.40   16.98
  -5   0  23  367.67   15.53
  -5   0  23  361.88   17.67
   5   0  23  370.70   22.34
  -5   0 -24    7.90    3.04
  -5   0  24    1.92    1.34
  -5   0  24   11.08    6.05
  -5   0 -25  300.79   24.32
  -5   0  25  300.89   16.14
  -5   0  25  265.61   14.29
   5   0  25  314.34   22.97
  -5   0 -26  125.30   22.34
  -5   0  26   72.45   21.56
   5   0  26  106.33   22.94
  -5   0 -27  588.71   32.74
  -5   0  27  485.29   27.21
   5   0  27  545.92   30.10
  -5   0  28   31.80    7.12
  -5   0  28   42.16   10.01
   5   0  28   54.32   10.79
   5   0  29   24.64   14.18
  -5   0  29   26.02    7.87
   5   0  29   35.14    7.67
   5   0  30   25.58   10.00
  -5   0  30   29.07    7.74
   5   0  30   18.65    6.70
   5   0  31   15.14    5.24
  -5   0  31   12.11    4.53
   5   0  31   20.16    7.36
   5   0  32   10.33    6.97
  -5   0  32   21.14    7.37
   5   0  33   45.84    8.76
  -5   0  33   32.81    9.32
   5   0  33   33.28   28.37
  -5   0  34   43.68   10.21
   5   0  34   51.40   15.23
   5   0  35  296.73   17.06
  -5   0  35  297.42   16.36
   5   0  35  246.34   33.22
   5   0  36   28.89    7.46
  -5   0  36   30.37   10.23
   5   0  36   24.67   14.39
   5   0  37    4.69    4.51
  -5   0  37    4.10    4.86
   5   0  37    5.65    5.54
   5   0  38   16.50    6.26
  -5   0  38   44.26   11.02
   5   0  38   48.15   10.96
   5   0  39   -3.21    5.40
  -5   0  39    7.95    5.28
   5   0  39   -1.17    7.05
   5   0  40   19.77    8.89
  -5   0  40    7.93    4.19
   5   0  40   12.06    2.95
   6   0   0  253.01   13.16
   6   0   0  342.44   16.97
   6   0   0  360.80   81.06
   6   0   1 1005.10   30.23
   6   0  -1 1270.69   37.27
   6   0   1 1249.62   35.95
  -6   0   1 1463.80   40.41
   6   0   1 1386.42   38.88
   6   0  -1 1415.18   38.86
   6   0   1 1408.53   39.67
   6   0  -2   29.18    7.93
   6   0   2   28.29    7.79
   6   0  -2   48.63    9.73
   6   0   2   39.28    9.38
  -6   0   2   47.53   11.86
   6   0   2   42.66    5.38
   6   0  -2   36.86    3.32
   6   0   2   45.02    8.04
   6   0  -3   65.03    8.10
   6   0   3   67.54    4.92
   6   0  -3   89.98    6.26
   6   0   3   85.03    6.91
   6   0   3   88.01    7.07
  -6   0   3  100.37   14.27
   6   0  -3   91.94    6.66
   6   0   3   95.48    9.50
   6   0  -4  164.94    8.90
   6   0   4  168.71    9.54
   6   0  -4  206.80   11.32
   6   0   4  184.51   13.43
   6   0   4  219.02   11.71
  -6   0   4  228.11   13.05
   6   0  -4  222.44   11.76
   6   0   4  206.19   12.42
   6   0  -5  190.22    9.98
   6   0  -5  253.56   13.15
   6   0   5  220.19   12.41
   6   0   5  244.79   13.23
  -6   0   5  267.43   15.17
   6   0  -5  245.87   12.75
   6   0   5  253.22   14.09
   6   0  -6    5.87    2.08
   6   0  -6    8.42    2.32
   6   0   6    3.75    3.14
  -6   0   6    6.82    3.80
   6   0  -6    7.33    3.33
   6   0   6   -0.31    2.76
  -6   0  -6    0.88    2.17
   6   0  -7  115.40    8.32
   6   0  -7  139.18    9.73
  -6   0   7  157.28   12.31
   6   0  -7  150.21    9.91
   6   0   7  149.15   11.00
  -6   0  -7  148.54   11.85
  -6   0  -8   18.37    5.31
   6   0  -8   11.26    2.10
   6   0  -8   30.50    5.00
  -6   0   8   23.69    5.63
   6   0  -8   16.88    4.97
   6   0   8   16.43    5.04
  -6   0  -8   17.48    3.51
   6   0  -9 1354.63   37.14
  -6   0  -9 1402.04   40.61
   6   0  -9 1648.62   45.98
  -6   0   9 1738.05   50.44
   6   0  -9 1603.85   44.89
   6   0   9 1690.18   47.02
  -6   0  -9 1709.58   48.90
  -6   0 -10    0.49    3.46
   6   0 -10    4.57    1.82
  -6   0  10   15.22    3.88
   6   0 -10    9.44    4.53
   6   0  10   14.99    3.98
  -6   0 -10    9.41    3.72
   6   0 -11    6.46    2.33
  -6   0 -11   14.88    4.14
   6   0 -11    9.15    2.85
  -6   0  11   14.77    3.33
   6   0 -11    7.05    4.23
   6   0  11    5.99    2.40
  -6   0 -12   38.27   10.42
   6   0 -12   43.54    3.99
  -6   0  12   54.26   12.27
   6   0 -12   38.71    9.72
   6   0  12   51.51    4.90
  -6   0 -13  353.75   21.48
   6   0 -13  397.92   16.51
  -6   0  13  422.05   23.84
   6   0  13  376.00   18.23
  -6   0 -14  178.03   14.38
   6   0 -14  232.00    9.89
  -6   0  14  203.07    8.97
  -6   0  14  268.73   13.71
   6   0  14  238.31   14.06
  -6   0 -15  198.96   18.39
   6   0 -15  212.54   11.16
  -6   0  15  217.61   11.30
  -6   0  15  244.25   15.14
   6   0  15  277.92   23.33
   6   0 -16    4.99    1.28
  -6   0  16   14.16    3.95
   6   0  16    4.14    3.50
  -6   0  17  753.19   20.70
  -6   0  17  853.59   29.60
   6   0  17  811.03   28.53
  -6   0 -18   15.71    7.25
  -6   0  18   16.21    2.49
  -6   0  18   24.58    7.64
   6   0  18   34.94    8.52
  -6   0 -19   84.26   18.80
  -6   0  19   71.63    1.18
  -6   0  19   68.15   10.01
   6   0  19   74.09   17.68
  -6   0 -20   24.66    6.95
  -6   0  20   15.33    4.93
   6   0  20   26.76    6.76
  -6   0 -21  249.29   13.92
  -6   0  21  270.78   10.14
  -6   0  21  303.09   14.33
   6   0  21  297.32   25.38
  -6   0 -22   98.01   25.70
  -6   0  22   73.59    1.57
  -6   0  22   73.66   18.15
   6   0  22   85.25    8.25
  -6   0  23  286.92    8.71
  -6   0  23  291.67   14.52
   6   0  23  303.14   19.21
  -6   0 -24    6.41    4.28
  -6   0  24    1.52    0.67
  -6   0  24    1.48    0.87
  -6   0  24   -0.58    3.34
   6   0  24    3.73    3.77
  -6   0  25  147.82    6.48
  -6   0  25  149.37   21.24
   6   0  25  169.89   29.10
   6   0  26   56.56   16.26
   6   0  26   67.16   13.53
   6   0  27   91.09   15.45
  -6   0  27   78.37   11.48
   6   0  27   92.67   11.02
  -6   0  28    7.91    4.47
   6   0  28   11.74    5.81
   6   0  29   10.15    3.84
  -6   0  29   21.26    4.92
   6   0  29   27.68    9.61
   6   0  30   20.08    6.62
   6   0  30    6.54    2.67
   6   0  31  615.11   34.40
  -6   0  31  471.84   42.63
   6   0  31  571.91   34.20
   6   0  32    8.03    7.68
   6   0  32    4.53    6.63
   6   0  33    6.04    4.46
  -6   0  33   -0.52    5.12
   6   0  33    0.89    4.08
   6   0  34   26.76    6.03
  -6   0  34   20.28    6.62
   6   0  34   19.84    8.27
   6   0  35    9.10    6.22
  -6   0  35    1.83    3.57
   6   0  35    2.43    3.87
   6   0  36   50.50   13.12
  -6   0  36   34.94   10.96
   6   0  36   29.43   13.11
   6   0  37   35.24   10.69
  -6   0  37   15.19    8.08
   6   0  37   21.49    7.31
   6   0  38    6.46    4.50
  -6   0  38    6.91    3.77
   6   0  38   11.27    8.85
   6   0  39  256.77   32.00
  -6   0  39  267.02   40.84
   6   0  39  294.96   32.97
   7   0   0    1.07    1.97
   7   0   0   -0.54    2.41
   7   0   0    1.28    2.01
   7   0   0    0.44    1.48
   7   0  -1  149.68   11.82
   7   0   1  140.48    9.51
   7   0  -1  183.47   12.32
   7   0   1  194.66   17.41
  -7   0   1  201.11   15.59
   7   0   1  204.65   12.94
   7   0  -1  191.48   13.83
   7   0   1  195.48   12.63
   7   0  -2    5.87    2.72
   7   0  -2    5.12    1.60
   7   0   2    9.52    3.38
  -7   0   2   12.84    3.32
   7   0   2    8.47    3.78
   7   0  -2    7.71    2.50
   7   0   2   11.66    3.95
   7   0  -3 1288.37   35.77
   7   0   3 1163.12   33.62
  -7   0   3 1400.65   39.44
   7   0   3 1318.85   36.54
   7   0  -3 1349.17   37.41
   7   0   3 1335.01   38.23
   7   0  -4   97.92   19.67
   7   0  -4  179.71   13.66
   7   0   4  181.72   17.64
   7   0   4  178.24   14.17
  -7   0   4  170.88   12.65
   7   0  -4  171.51   14.23
   7   0   4  199.54   15.80
   7   0   5 2217.59   61.19
   7   0   5 2727.56   16.42
  -7   0   5 2838.99   13.56
   7   0   5 2755.56   14.73
   7   0  -6   21.55    4.24
   7   0  -6   32.93    6.37
   7   0   6   26.08    7.51
   7   0   6   26.19    7.47
  -7   0   6   31.22    7.88
   7   0  -6   28.41    6.47
   7   0   6   35.76    6.56
   7   0  -7    1.90    1.31
   7   0  -7    2.14    2.45
   7   0   7   -1.33    4.46
   7   0   7    7.57    3.02
  -7   0   7    9.55    3.15
   7   0  -7    5.59    2.10
   7   0   7    6.33    3.02
   7   0  -8   48.52    3.37
   7   0  -8   75.74    7.73
   7   0   8   74.69   17.39
  -7   0   8   72.67   10.43
   7   0  -8   70.70    5.19
   7   0   8   64.95    9.21
  -7   0  -8   79.06    6.63
   7   0  -9   82.69    4.66
   7   0  -9  116.03    6.45
   7   0   9  111.89   23.10
  -7   0   9  132.21   13.03
   7   0  -9  102.77    9.23
   7   0   9  121.22    6.33
  -7   0  -9  107.47   11.74
   7   0 -10   21.82    4.22
   7   0 -10   35.02    5.23
   7   0  10   36.94    8.05
  -7   0  10   44.93   10.34
   7   0 -10   30.24    7.11
   7   0  10   44.84   10.67
   7   0 -11   48.26    4.04
   7   0 -11   68.07    4.74
   7   0  11   57.81   16.37
  -7   0  11   81.21   14.52
   7   0 -11   55.99    8.72
   7   0  11   68.49    7.11
   7   0 -12   23.52    3.30
   7   0  12   17.49    5.08
  -7   0  12   21.42    4.22
   7   0  12   26.26    4.45
   7   0 -13 1143.82   31.84
  -7   0  13 1272.32   39.04
   7   0  13 1099.99   36.09
   7   0 -14  196.13   11.00
   7   0 -14  260.88   14.06
  -7   0  14  268.93   15.76
   7   0  14  300.70   24.04
   7   0 -15    5.78    1.55
  -7   0  15   13.76    5.20
   7   0  15   14.86    3.10
  -7   0  16   -0.25    3.70
   7   0  16    2.82    2.83
  -7   0  17  326.95   29.89
   7   0  17  310.34   23.97
  -7   0  18  135.49   10.19
   7   0  18  106.06    9.46
  -7   0  19  254.09   15.97
   7   0  19  200.11   14.92
  -7   0  20   43.93   10.12
   7   0  20   22.59    6.65
   7   0  21  545.23   21.16
  -7   0  21  615.29   23.36
   7   0  21  549.37   24.39
   7   0  22   71.30   16.26
  -7   0  22   68.15   18.44
   7   0  22   53.93   16.49
   7   0  23  173.18   22.43
  -7   0  23  174.31   10.25
   7   0  23  178.93   16.36
   7   0  24   41.51    7.84
  -7   0  24   35.18   13.71
   7   0  24   33.65    7.71
   7   0  25   77.90   17.21
  -7   0  25   78.72   20.47
   7   0  25   77.84   23.06
   7   0  26    8.84    4.92
  -7   0  26   -4.36    4.84
   7   0  26    4.02    5.36
   7   0  27  300.67   17.46
  -7   0  27  332.35   21.18
   7   0  27  309.82   29.85
   7   0  28   -0.40    5.86
  -7   0  28    5.81    3.22
   7   0  28    6.56    4.48
   7   0  29   57.80   18.83
  -7   0  29   57.36    9.91
   7   0  29   53.72   10.22
   7   0  30    1.23    2.96
   7   0  30    6.11    4.09
   7   0  31   36.61    8.66
  -7   0  31   21.69    6.95
   7   0  31   30.29    9.06
   7   0  32   44.35   13.67
  -7   0  32   34.74    6.59
   7   0  32   49.90   12.12
   7   0  33   31.25    9.30
  -7   0  33   29.86    9.18
   7   0  33   42.30   12.53
   7   0  34   10.26    4.46
  -7   0  34    6.41    5.99
   7   0  34    5.82    6.14
   7   0  35  341.32   20.27
  -7   0  35  305.10   19.16
   7   0  35  300.08   32.34
  -7   0  36    4.81    5.81
   7   0  36    9.48    4.56
   7   0  37   -3.88    5.89
  -7   0  37    1.35    2.95
   7   0  37    4.01    2.83
   7   0  38   31.15   17.66
  -7   0  38   32.55   13.56
   7   0  38   26.62   12.05
   8   0   0  637.93   25.23
   8   0   0  664.97   22.84
   8   0   0  711.48   28.05
   8   0  -1  854.19   29.35
   8   0   1  840.35   30.86
   8   0   1  910.93   31.70
   8   0  -1  909.69   30.97
   8   0   1  960.90   33.28
   8   0  -1  966.38   32.67
   8   0  -2  186.79   13.57
   8   0  -2  254.42   12.50
   8   0   2  240.70   11.90
  -8   0   2  309.45   15.01
   8   0   2  269.28   12.22
   8   0  -2  268.04   12.28
   8   0   2  299.61   14.95
   8   0  -3   48.35   11.76
   8   0  -3   99.20    9.76
   8   0   3   76.08    5.50
  -8   0   3   87.61   10.52
   8   0   3   76.68   10.93
   8   0  -3   84.02    5.65
   8   0   3   91.00   10.03
   8   0  -4   35.77    9.57
   8   0  -4   62.39    7.86
   8   0   4   49.55   11.09
  -8   0   4   58.47    9.05
   8   0   4   53.25    6.97
   8   0  -4   53.19    6.94
   8   0   4   68.23    8.05
   8   0  -5  116.86    4.82
   8   0  -5  163.77    7.17
   8   0   5  160.49   15.27
   8   0   5  182.15    9.78
  -8   0   5  177.57   12.32
   8   0  -5  163.58    7.75
   8   0   5  169.98    9.19
   8   0  -6    5.18    1.85
   8   0  -6    6.92    2.64
   8   0   6   12.65    2.20
   8   0   6    6.54    2.70
  -8   0   6    5.96    2.07
   8   0  -6    9.82    1.70
   8   0   6    7.56    3.26
   8   0  -7   77.88    5.55
   8   0  -7  101.84    4.84
   8   0   7  101.77   10.07
   8   0   7  105.19    5.95
  -8   0   7  115.65   10.39
   8   0  -7  103.69    6.80
   8   0   7  111.24    6.17
   8   0  -8  103.77    9.21
   8   0   8  115.33    9.96
  -8   0   8  121.37   11.74
   8   0  -8  103.78    6.57
   8   0   8  132.35   14.20
   8   0  -9  871.71   25.09
   8   0   9  743.00   23.24
  -8   0   9  965.97   29.93
   8   0  -9  881.58   26.12
   8   0   9  877.56   26.39
   8   0 -10  205.08   11.61
   8   0 -10  294.47   16.59
   8   0  10  236.30   15.28
  -8   0  10  305.04   18.68
   8   0 -10  282.63   16.55
   8   0  10  308.54   18.27
   8   0 -11   26.47    4.91
   8   0 -11   43.74    5.90
   8   0  11   53.39   12.48
  -8   0  11   62.47   10.89
   8   0  11   45.45    9.90
   8   0 -12    7.94    1.98
   8   0 -12   16.09    2.90
   8   0  12   15.73    6.64
  -8   0  12   23.32    4.65
   8   0  12   14.41    3.63
   8   0 -13  262.80   16.32
   8   0 -13  355.48   21.82
   8   0  13  305.80    9.74
  -8   0  13  398.48   17.06
   8   0  13  361.12   11.43
   8   0 -14  148.69    9.84
   8   0 -14  202.51   12.37
   8   0  14  166.22   13.17
  -8   0  14  197.12   14.47
   8   0  14  198.77   21.21
   8   0 -15    1.32    0.69
   8   0  15   -6.72    7.72
  -8   0  15    3.34    2.41
   8   0  15    7.20    5.06
   8   0  16   75.10   18.69
   8   0  16   91.76   20.94
   8   0  17  563.75   24.32
  -8   0  17  722.98   32.76
   8   0  17  635.52   32.56
   8   0  18   33.26   10.66
  -8   0  18   72.08   14.65
   8   0  18   68.56   14.11
   8   0  19    6.39    4.22
  -8   0  19   -0.21    4.22
   8   0  19    9.95    4.39
   8   0  20    3.05    3.80
  -8   0  20   13.11    6.59
   8   0  20    4.08    4.86
   8   0  21  150.30   13.39
  -8   0  21  148.43   17.76
   8   0  21  142.70   11.45
   8   0  22   14.36    7.03
  -8   0  22   12.29    7.94
   8   0  22   12.10    5.89
   8   0  23  294.49   23.30
  -8   0  23  307.23   24.98
   8   0  23  270.28   25.58
   8   0  24    5.37    4.23
  -8   0  24   13.46    5.76
   8   0  25  120.64   10.84
  -8   0  25  148.39   10.26
   8   0  25  118.02   20.38
   8   0  26    1.04    5.03
  -8   0  26    3.83    2.66
   8   0  26   10.66    4.25
   8   0  27   22.36   10.01
  -8   0  27   28.63    7.00
   8   0  27   42.34   12.75
   8   0  28  127.80   14.43
  -8   0  28   98.48   29.44
   8   0  28  115.45   10.98
   8   0  29   43.83   10.13
  -8   0  29   39.12   12.11
   8   0  29   40.10   10.93
   8   0  30   60.10   12.74
  -8   0  30   36.45   11.47
   8   0  30   47.05   12.90
   8   0  31  429.26   22.38
  -8   0  31  350.70   22.45
   8   0  31  409.45   30.59
   8   0  32   22.55    9.94
  -8   0  32    6.01    3.06
   8   0  32   28.23   13.87
   8   0  33   -1.33    6.00
  -8   0  33    8.70    6.58
   8   0  33    3.43    4.05
   8   0  34   11.93    7.07
  -8   0  34    3.79    3.82
   8   0  34    9.06    6.57
   8   0  35   -3.58    5.86
  -8   0  35    6.50    4.54
   8   0  35   -0.80    6.22
   8   0  36   23.59    9.61
  -8   0  36    9.66    5.33
   8   0  36   19.22    7.42
   8   0  37    8.89    3.86
  -8   0  37    5.87    3.80
   8   0  37    1.44    5.17
   9   0   0    2.53    2.17
   9   0   0    1.16    2.67
   9   0   0   -0.59    2.09
   9   0   1   81.85    8.11
   9   0  -1   68.88    5.83
   9   0   1   72.14    8.16
   9   0  -1   61.06    7.02
   9   0   1   79.60    7.29
   9   0  -1   81.88    7.40
   9   0  -2  155.63   12.99
   9   0   2  156.02   11.54
   9   0   2  147.10   11.57
   9   0  -2  173.34   10.27
   9   0   2  171.72   13.36
   9   0  -3  383.53   13.11
   9   0   3  327.20   21.87
  -9   0   3  379.95   21.12
   9   0   3  341.38   19.97
   9   0  -3  349.79   18.95
   9   0   3  383.77   21.07
   9   0  -4  244.17   17.03
   9   0   4  223.97   16.62
  -9   0   4  264.02   15.81
   9   0   4  251.24   14.80
   9   0  -4  253.31   14.32
   9   0   4  274.49   15.93
   9   0  -5  236.50   13.71
   9   0  -5  359.20   42.77
   9   0   5  351.97   45.61
  -9   0   5  383.80   22.21
   9   0   5  377.81   20.79
   9   0  -5  373.27   44.57
   9   0   5  382.54   45.44
   9   0  -6   44.15    7.93
   9   0  -6   64.66    7.35
   9   0   6   76.59    5.88
  -9   0   6   76.96    6.61
   9   0   6   66.74    9.66
   9   0  -6   69.59    7.53
   9   0   6   88.28    8.68
   9   0  -7    5.82    2.45
   9   0  -7   14.32    3.10
   9   0   7   15.44    5.46
  -9   0   7   23.27    5.46
   9   0  -7   16.70    3.43
   9   0   7   14.68    4.26
   9   0  -8    6.02    2.30
   9   0  -8   14.21    3.76
   9   0   8   12.19    3.10
  -9   0   8   13.44    3.60
   9   0  -8   10.06    3.87
   9   0   8   21.54    5.35
   9   0  -9   83.22    6.95
   9   0  -9  109.88    4.59
   9   0   9  115.06   20.31
  -9   0   9  129.89    8.06
   9   0  -9  104.29    5.28
   9   0   9  117.98    8.33
   9   0 -10   15.48    4.65
   9   0 -10   32.56    6.34
   9   0  10   41.90    7.28
  -9   0  10   41.92    8.31
   9   0  10   33.97    8.61
   9   0 -11   33.76    4.77
   9   0 -11   55.10    5.83
   9   0  11   59.01   16.91
  -9   0  11   52.94    8.00
   9   0  11   47.88   12.96
   9   0 -12   52.37    4.31
   9   0 -12   91.08    6.34
   9   0  12  100.15   23.14
  -9   0  12   96.65   17.38
   9   0  12   83.48   16.72
   9   0 -13  420.41   15.96
   9   0 -13  579.53   22.31
   9   0  13  501.85   29.12
  -9   0  13  617.72   26.32
   9   0  13  538.98   26.19
   9   0 -14  182.04    9.47
   9   0 -14  234.80   12.33
   9   0  14  256.19   35.70
  -9   0  14  243.00   17.99
   9   0  14  232.99   21.80
   9   0 -15   -0.07    0.48
   9   0 -15    2.08    0.96
   9   0  15    6.40    7.26
  -9   0  15    2.72    3.02
   9   0  15    8.70    4.25
   9   0  16   15.88    8.59
  -9   0  16   34.76   10.07
   9   0  16   29.92    9.22
   9   0  17  171.47   21.18
  -9   0  17  206.15   15.64
   9   0  17  184.54   18.70
   9   0  18   34.66   11.46
  -9   0  18   53.02   15.57
   9   0  18   38.85   10.62
   9   0  19   63.05   10.25
  -9   0  19   70.52   17.03
   9   0  19   54.23   10.97
   9   0  20   -0.34    6.20
   9   0  20    4.51    4.46
   9   0  21  253.77   19.83
  -9   0  21  307.70   19.15
   9   0  21  239.61   24.80
   9   0  22    1.80    6.82
   9   0  22    4.50    3.64
   9   0  23   12.03    9.07
  -9   0  23    5.81    2.31
   9   0  23    8.29    4.37
   9   0  24   62.95   21.70
  -9   0  24   56.01   14.40
   9   0  24   52.05   14.00
   9   0  25   69.84   15.52
  -9   0  25   77.40   14.42
   9   0  25   72.85   14.48
   9   0  26   25.79    8.27
  -9   0  26   24.34    6.48
   9   0  26   25.42    7.77
   9   0  27  408.21   25.64
  -9   0  27  401.69   23.56
   9   0  27  363.67   30.41
   9   0  28   13.26    8.23
  -9   0  28    5.83    6.77
   9   0  28   12.06    4.79
   9   0  29   44.18   12.04
  -9   0  29   32.57    9.90
   9   0  29   44.57    9.18
  -9   0  30   13.90    7.80
   9   0  30    5.83    4.68
   9   0  31   27.89   13.05
  -9   0  31    6.09    2.43
   9   0  31   18.27    7.75
   9   0  32   39.19   13.56
  -9   0  32   17.90   11.34
   9   0  32   33.77   10.54
   9   0  33    4.73    3.53
   9   0  33   -4.92    5.62
   9   0  34   61.17   18.15
  -9   0  34   56.00   14.54
   9   0  34   57.51   16.65
   9   0  35  159.61   31.09
  -9   0  35  163.32   19.01
   9   0  35  161.42   37.05
  10   0   0  331.21   22.39
  10   0   0  346.66   22.01
  10   0   0  350.78   22.90
  10   0  -1  206.84   14.13
  10   0   1  194.33   14.51
  10   0   1  217.44   13.97
  10   0  -1  219.75   14.57
  10   0   1  220.55   14.26
  10   0  -1  219.40   15.26
  10   0  -2  185.32   20.49
  10   0   2  157.54   11.83
  10   0   2  167.26   10.83
  10   0  -2  167.92   11.71
  10   0   2  184.95   16.64
  10   0  -2  183.49   12.19
  10   0  -3   46.28   14.15
  10   0   3   50.05   12.52
  10   0   3   45.61    7.70
  10   0  -3   52.46    9.82
  10   0   3   57.97   15.23
  10   0  -4  123.75   13.40
  10   0   4  130.54   12.96
 -10   0   4  152.82    9.30
  10   0   4  112.22   14.15
  10   0  -4  122.66    8.38
  10   0   4  132.66   13.06
  10   0  -5  136.67   12.41
  10   0   5  135.31   12.86
 -10   0   5  163.00   10.13
  10   0  -5  139.89    7.74
  10   0   5  152.37    8.79
  10   0  -6   46.28   10.20
  10   0   6   43.03   11.61
 -10   0   6   50.42   11.52
  10   0  -6   34.08    8.66
  10   0   6   47.04    9.22
  10   0  -7   12.01    4.41
  10   0  -7   17.74    4.92
  10   0   7   12.47    2.67
 -10   0   7   19.34    5.69
  10   0  -7   12.37    5.16
  10   0   7   18.00    8.07
  10   0  -8  360.75   15.27
  10   0   8  320.23   25.46
 -10   0   8  374.58   19.27
  10   0   8  309.42   13.44
  10   0  -9  274.29   11.07
  10   0  -9  391.26   18.29
  10   0   9  357.09   26.56
 -10   0   9  445.04   19.04
  10   0   9  376.35   15.81
  10   0 -10  172.73   11.08
  10   0  10  159.14   17.87
 -10   0  10  169.07   15.91
  10   0  10  176.39   17.68
  10   0 -11    1.06    0.88
  10   0 -11    0.88    1.58
  10   0  11    5.42    3.01
 -10   0  11    8.32    4.85
  10   0  11   10.27    4.87
  10   0 -12    6.65    2.68
  10   0 -12   17.48    4.09
  10   0  12   13.99    5.84
 -10   0  12   18.79    4.70
  10   0  12   11.77    5.00
  10   0 -13   75.29    4.33
  10   0  13   81.19   16.01
 -10   0  13   69.71    8.99
  10   0  13   75.10   10.44
  10   0 -14   19.16    7.00
  10   0  14   17.48    8.58
 -10   0  14   13.82    5.88
  10   0  14   14.40    7.25
  10   0 -15    0.29    0.52
 -10   0  15    6.03    3.95
  10   0  15   -0.63    3.86
  10   0  16   86.32   19.88
 -10   0  16   98.24   13.94
  10   0  16   83.99    8.08
  10   0  17  385.18   26.51
 -10   0  17  498.83   26.20
  10   0  17  442.27   27.22
  10   0  18  144.17   10.06
 -10   0  18  194.34    8.54
  10   0  18  173.78   16.43
  10   0  19   19.30    9.06
 -10   0  19   15.25    4.12
  10   0  19   25.91    7.18
  10   0  20  146.86   24.19
 -10   0  20  170.21   11.83
  10   0  20  152.78   13.95
  10   0  21    1.18    6.40
 -10   0  21   30.16    7.18
  10   0  21   23.15   11.04
  10   0  22   92.17   17.92
 -10   0  22  132.48   19.05
  10   0  22   87.54   18.55
  10   0  23  190.80   43.42
 -10   0  23  272.63   17.67
  10   0  23  173.28   14.91
  10   0  24    4.31    3.85
 -10   0  24    7.76    4.13
  10   0  24    8.18    6.39
  10   0  25   25.91   12.60
 -10   0  25   26.95    7.11
  10   0  25   37.93    8.09
  10   0  26   37.81   11.03
 -10   0  26   37.43   10.45
  10   0  26   30.77   11.39
  10   0  27   11.26    4.96
  10   0  27    7.87    4.05
  10   0  28   40.08    9.94
 -10   0  28   38.49   14.97
  10   0  28   30.84   10.43
  10   0  29    5.44    5.56
  10   0  29    6.24    4.12
  10   0  30  100.12   34.61
 -10   0  30   82.10   16.04
  10   0  30  117.22   15.96
  10   0  31  161.41   15.89
 -10   0  31  153.36   21.55
  10   0  31  156.03   23.38
  10   0  32   41.99   23.03
 -10   0  32   39.74   16.70
  10   0  32   50.22   12.44
  10   0  33    1.59    5.57
 -10   0  33    7.44    5.04
  10   0  33   -0.84    5.90
  10   0  34   -2.38    6.12
 -10   0  34    1.73    3.68
  10   0  34    3.47    4.73
  11   0   0    1.74    2.60
  11   0   0   -1.83    2.19
  11   0  -1  159.05   20.75
  11   0   1  175.80   17.19
  11   0  -1  149.76    8.87
  11   0   1  168.71   10.16
  11   0  -1  145.18   10.21
  11   0  -2   43.85    9.14
  11   0   2   38.28    7.24
  11   0  -2   30.61    7.67
  11   0   2   42.59    9.51
  11   0  -2   48.38   10.29
  11   0  -3   51.52   10.59
  11   0   3   41.60   11.49
  11   0  -3   33.18    8.82
  11   0   3   49.57    6.34
  11   0  -3   50.26   12.18
  11   0  -4  283.63   21.05
  11   0   4  291.90   21.48
  11   0   4  275.87   57.89
  11   0  -5  288.63   10.87
  11   0   5  264.32   23.45
 -11   0   5  295.70   11.41
  11   0   5  275.79   12.50
  11   0  -6   72.42   10.44
  11   0   6   79.30   21.00
 -11   0   6   79.16    6.31
  11   0   6   82.70   11.66
  11   0  -7   64.55    8.21
  11   0   7   75.36   21.65
 -11   0   7   67.16   16.25
  11   0   7   59.62    8.38
  11   0  -8   18.90    8.25
  11   0   8   21.71    8.32
 -11   0   8   22.28    8.19
  11   0   8   29.24   12.02
  11   0  -9    3.26    1.38
  11   0   9    6.68    3.67
 -11   0   9    7.73    4.59
  11   0   9   -4.46    2.82
  11   0 -10    4.52    2.99
  11   0  10    5.71    3.81
 -11   0  10    4.18    2.38
  11   0  10    2.83    2.00
  11   0 -11   21.60    8.43
  11   0  11   12.23    6.28
 -11   0  11   27.07    9.78
  11   0  11   19.07    7.83
  11   0 -12   89.53    6.55
  11   0  12   86.10    9.70
 -11   0  12   95.54   18.64
  11   0  12   80.72   17.80
  11   0 -13  256.28    6.27
  11   0  13  233.80   17.58
 -11   0  13  287.19    9.34
  11   0  13  250.25   10.82
  11   0  14   96.92   20.70
 -11   0  14  134.56   13.42
  11   0  14  108.04   17.06
  11   0  15   52.30   12.05
 -11   0  15   55.78   10.22
  11   0  15   54.75   12.78
  11   0  16  160.24   30.92
 -11   0  16  178.13   15.91
  11   0  16  178.20   19.11
  11   0  17   49.15   13.70
 -11   0  17   49.45    9.31
  11   0  17   34.64   10.48
  11   0  18  194.15   18.70
 -11   0  18  235.35   10.29
  11   0  18  193.68   12.25
  11   0  19   98.58   24.87
 -11   0  19  153.55    9.24
  11   0  19  146.07   16.59
  11   0  20    6.38    6.19
  11   0  20   11.47    3.26
  11   0  21  103.52   21.93
 -11   0  21   94.53   15.77
  11   0  21   97.66   11.28
  11   0  22   99.13    9.51
 -11   0  22  101.13   21.77
  11   0  22   71.33   17.80
  11   0  23    8.17    4.56
 -11   0  23   25.73    5.76
  11   0  23   26.91   10.07
  11   0  24   84.61   19.25
 -11   0  24   75.18   21.45
  11   0  24   66.13   20.34
  11   0  25    9.11    5.74
 -11   0  25   20.95    6.90
  11   0  25   12.29    8.45
  11   0  26  119.55   20.23
 -11   0  26  125.33   19.66
  11   0  26   95.04    9.03
  11   0  27   70.54   21.41
 -11   0  27   58.59   19.78
  11   0  27   59.85   12.60
  11   0  28   19.39    9.26
 -11   0  28   22.55   10.53
  11   0  28   23.71   12.05
  11   0  29    9.98    6.19
 -11   0  29   11.26    5.68
  11   0  29   13.74    5.81
  11   0  30    5.80    4.83
 -11   0  30    8.18    3.87
  11   0  30    5.74    3.62
  11   0  31   -2.21    6.39
 -11   0  31    1.14    2.52
  11   0  31    5.28    3.28
  11   0  32   13.29    8.51
 -11   0  32   18.05    6.75
  11   0  32   22.96    5.69
  12   0   0  611.24   34.52
  12   0   0  627.29   29.50
  12   0  -1  193.16   20.07
  12   0   1  206.52   18.34
  12   0   1  217.16    9.11
  12   0  -1  238.66    6.18
  12   0  -2   34.48   10.02
  12   0   2   38.86    6.83
  12   0   2   41.04    9.22
  12   0  -2   33.14    8.80
  12   0  -3   34.11    7.71
  12   0   3   42.39    5.76
  12   0   3   41.44    9.68
  12   0  -3   31.16    8.86
  12   0  -4    6.62    3.16
  12   0   4    3.16    3.84
  12   0   4    1.83    2.49
  12   0  -4    5.02    2.74
  12   0  -5   72.34    7.44
  12   0   5   66.38   18.97
  12   0   5   75.46    9.29
  12   0  -5   78.92    8.82
  12   0  -6   10.49    3.87
  12   0   6    7.11    3.84
 -12   0   6   10.28    3.07
  12   0   6    6.84    2.96
  12   0  -7    7.84    3.40
  12   0   7    5.27    2.07
 -12   0   7    5.55    2.25
  12   0   7    2.43    2.71
  12   0  -8  207.36    7.02
  12   0   8  213.62   10.60
 -12   0   8  249.70    6.15
  12   0   8  224.14    7.38
  12   0  -9   78.58   11.26
  12   0   9   88.68   22.60
 -12   0   9   92.90    9.84
  12   0   9   99.68   16.11
  12   0 -10  259.30   10.66
  12   0  10  229.80   17.51
 -12   0  10  260.25   14.87
  12   0  10  249.65   16.34
  12   0  11  120.00   29.04
 -12   0  11  126.87   13.26
  12   0  11  115.32   10.88
  12   0  12   70.51   14.35
 -12   0  12   72.40   15.66
  12   0  12   61.48   14.96
  12   0  13    2.33    3.98
 -12   0  13    2.68    1.03
  12   0  13    2.41    3.31
  12   0  14   61.71   16.94
 -12   0  14   60.54   13.12
  12   0  14   73.42    8.68
  12   0  15   -0.22    5.78
 -12   0  15    3.90    2.17
  12   0  15    2.55    2.90
  12   0  16   53.03   15.68
 -12   0  16   48.78   11.74
  12   0  16   42.50   10.05
  12   0  17  108.17   17.18
 -12   0  17  120.25    8.63
  12   0  17  105.63    7.91
  12   0  18  126.79   28.01
 -12   0  18  171.45    9.12
  12   0  18  142.55   19.56
  12   0  19   55.91   13.60
 -12   0  19   48.67   14.37
  12   0  19   37.99   11.72
  12   0  20  137.03   13.86
 -12   0  20  194.36   10.79
  12   0  20  154.31   11.98
  12   0  21    6.21    4.10
  12   0  21    2.14    1.91
  12   0  22   83.49   22.22
 -12   0  22  126.10   10.01
  12   0  22  100.05   13.28
  12   0  23    7.84    7.56
 -12   0  23   20.17    6.21
  12   0  23    8.30    4.98
  12   0  24    5.96    6.48
 -12   0  24    5.93    2.70
  12   0  24    0.54    2.77
  12   0  25   70.02   12.82
 -12   0  25   60.03   18.98
  12   0  25   51.62   18.90
  12   0  26   30.63    8.22
 -12   0  26   26.69    7.47
  12   0  26   34.68   12.31
  12   0  27   10.42    6.89
 -12   0  27    3.67    3.49
  12   0  27    2.27    5.05
  12   0  28   52.31   15.72
  12   0  28   24.09    6.68
  12   0  29   12.55    8.11
  12   0  29    8.43    8.83
  12   0  30   89.49   31.72
  12   0  30   88.18   29.81
  13   0   0    4.94    3.93
  13   0   0    3.85    1.79
  13   0  -1   29.43    8.64
  13   0   1   31.30    7.53
  13   0   1   33.86    8.01
  13   0  -1   30.47    8.32
  13   0  -2   35.70    9.26
  13   0   2   38.82   13.10
  13   0   2   32.72    9.51
  13   0  -2   30.20    6.90
  13   0  -3   14.78    5.31
  13   0   3   21.16    5.38
  13   0   3   12.83    5.07
  13   0  -3   16.16    5.31
  13   0  -4  329.94   19.07
  13   0   4  345.10   22.58
  13   0   4  332.61   19.04
  13   0  -4  358.72   19.45
  13   0  -5   14.57    5.81
  13   0   5   25.87    9.60
  13   0   5   20.90    6.44
  13   0  -5   16.21    7.07
  13   0  -6   61.14    8.41
  13   0   6   63.53   11.70
  13   0   6   66.37   10.96
  13   0  -6   66.86   10.87
  13   0  -7  168.51    7.81
  13   0   7  136.34   10.48
  13   0   7  163.04   16.30
  13   0  -8   23.92    7.78
  13   0   8   32.21    8.06
 -13   0   8   28.86    7.79
  13   0   8   31.29    6.36
  13   0  -9    2.33    1.78
  13   0   9    4.11    3.15
 -13   0   9    2.35    2.39
  13   0   9    0.70    1.28
  13   0  10   43.09   10.66
 -13   0  10   37.78    8.15
  13   0  10   40.24   10.82
  13   0  11   14.22    8.35
  13   0  12  103.68   15.59
 -13   0  12   75.76   19.72
  13   0  12   96.52   10.82
  13   0  13   12.93    4.83
 -13   0  13    5.52    3.31
  13   0  13   15.86    6.90
  13   0  14  172.65   16.42
  13   0  14  162.04   13.15
  13   0  15  101.44   28.84
  13   0  15   91.14   13.36
  13   0  16   73.17   14.09
  13   0  16   57.82   17.52
  13   0  17   -1.31    4.07
  13   0  17    3.59    1.86
  13   0  18   77.76   20.30
  13   0  18   83.65   11.08
  13   0  19   22.68    8.47
  13   0  19   24.14    9.19
  13   0  20    3.56    4.90
  13   0  20    5.33    2.15
  13   0  21   23.76    9.75
  13   0  21   19.19    6.45
  13   0  22   45.21   15.34
  13   0  22   43.70   10.24
  13   0  23   45.71   13.11
  13   0  23   45.45   15.25
  13   0  24   50.45   16.27
  13   0  24   38.53   10.45
  13   0  25   21.48    5.48
  13   0  25   32.00    6.54
  13   0  26  158.80   15.69
  13   0  26  128.32   16.14
  13   0  27    3.49    5.38
  13   0  27    5.96    4.00
  14   0   0  249.63   22.41
  14   0  -1    6.25    4.45
  14   0   1   11.19    8.25
  14   0  -2   31.49   10.55
  14   0   2   35.67   11.63
  14   0  -3   95.43   20.29
  14   0   3  107.65    8.05
  14   0  -4    6.81    3.05
  14   0   4   20.03    4.06
  14   0  -5    9.54    3.96
  14   0   5    5.85    3.82
  14   0  -6    5.94    2.42
  14   0   6    1.48    3.27
  14   0   7   21.80    9.66
  14   0   8  221.88   11.53
  14   0   9   27.12    7.65
  14   0  10  101.05   20.36
  14   0  11  102.70   22.23
  14   0  12   54.08   13.81
  14   0  13    6.61    3.23
  14   0  14   54.10   14.36
  14   0  15    1.73    4.03
  14   0  16   41.49   11.93
  14   0  17   32.74   10.91
  14   0  18   54.43    9.32
  14   0  19   56.55   24.70
  14   0  20   12.61    4.27
  14   0  21   16.38    4.77
  14   0  22  100.83   21.22
  14   0  23   10.11    6.70
  14   0  24    7.65    5.27
  15   0   0    7.14    4.78
  15   0  -1   76.41   11.38
  15   0   1   74.56   11.03
  15   0  -2    7.47    4.05
  15   0   2    7.51    3.02
  15   0  -3   83.06    9.92
  15   0   3   65.79   20.06
  15   0   4  137.43   16.39
  15   0   5   30.95    9.98
  15   0   6   42.30   16.34
  15   0   7  194.20   22.32
  15   0   8   56.39   14.73
  15   0   9    7.95    5.82
  15   0  10   33.73    8.06
  15   0  11   22.63    9.74
  15   0  12  102.60   14.57
  15   0  13    3.38    3.59
  15   0  14   34.18   10.43
  15   0  15   85.65   19.70
  15   0  17   19.13    4.36
  15   0  18   60.39   18.87
  15   0  19   27.04    8.49
  15   0  20   14.15    6.56
  16   0   0   19.94    8.05
  16   0   1   55.38   14.37
  16   0   2   13.39    5.83
  16   0   3  121.83   14.03
  16   0   4    1.84    3.49
  16   0   5   30.17    8.15
  16   0   6   10.01    4.69
  16   0   7   43.57   16.26
  16   0   8  120.75   17.44
  16   0   9   15.57    7.16
  16   0  10   27.42    9.04
  16   0  11   81.90   27.60
  16   0  12    8.15    3.52
  16   0  13   16.21    9.32
  16   0  14   54.33   24.12
  16   0  15   10.43    3.59
  17   0   4   52.97   22.92
  17   0   5   29.35   12.80
  17   0   6    7.38    4.60
   0  -1  -4    6.37    2.44
   0   1   4    5.46    2.64
   0  -1   4    7.95    3.11
   0   1  -4    4.39    2.05
   0  -1   4    5.26    3.74
   0   1  -4    3.91    2.30
   0   1   4    9.03    3.76
   0  -1  -4    7.12    2.95
   0  -1  -5 1325.53   18.33
   0   1   5 1292.62   17.22
   0  -1   5 1393.37   18.56
   0   1  -5 1425.69   18.79
   0  -1   5 1387.55   19.13
   0   1  -5 1360.98   20.08
   0   1   5 1473.18   20.14
   0  -1  -5 1375.34   18.64
   0  -1   6   -0.53    1.11
   0  -1  -6    0.57    1.11
   0   1   6    2.10    2.58
   0  -1   6    0.76    1.09
   0  -1   6   -0.58    2.48
   0   1  -6    1.03    2.05
   0   1   6    5.20    3.72
   0  -1  -6   -0.52    1.84
   0  -1   7    3.59    3.79
   0  -1  -7    3.93    3.62
   0   1   7    4.35    1.77
   0  -1   7    9.62    3.89
   0  -1   7    9.65    3.76
   0   1  -7   13.15    3.62
   0   1   7   10.63    4.73
   0  -1  -7   10.39    2.24
   0  -1   8    1.22    2.31
   0  -1  -8    7.61    3.84
   0   1   8   -0.16    2.32
   0  -1   8    4.33    3.15
   0  -1   8    1.39    2.06
   0   1  -8    0.35    2.91
   0   1   8   -0.97    2.96
   0  -1  -8   -0.86    2.66
   0  -1   9   13.39    2.97
   0  -1  -9   21.34    5.57
   0   1   9   14.05    3.25
   0  -1   9   14.47    4.15
   0  -1   9   19.04    4.36
   0   1  -9   14.55    3.80
   0   1   9   15.84    3.11
   0  -1  -9   13.09    2.82
   0  -1  10    1.09    1.39
   0  -1 -10   -0.32    3.29
   0   1  10    1.45    3.79
   0  -1  10   -3.94    2.83
   0  -1  10   -1.06    4.27
   0   1 -10   -1.70    3.49
   0   1  10   -3.81    3.34
   0  -1 -10    1.37    1.87
   0  -1  11 1003.46   16.58
   0  -1  11 1000.60   15.40
   0   1 -11  962.11   14.50
   0   1  11  995.73   15.14
   0  -1 -11 1008.35   15.29
   0   1 -12    1.32    1.13
   0  -1  12    2.12    1.91
   0  -1 -12    0.98    2.00
   0   1  12    0.12    2.47
   0  -1  12   -0.60    6.91
   0   1 -12    0.78    2.06
   0   1  12    2.26    3.82
   0  -1 -12   -0.41    2.88
   0   1 -13    1.25    2.27
   0  -1  13    2.09    2.08
   0  -1 -13    3.44    1.47
   0   1  13    3.87    2.64
   0  -1  13    5.06    3.17
   0   1 -13    3.02    2.37
   0   1  13   -1.10    4.68
   0  -1 -13    2.97    1.63
   0  -1  14    4.33    1.84
   0  -1 -14   -1.06    3.02
   0   1  14   -0.99    1.87
   0  -1  14    7.37    5.63
   0   1  14    3.42    2.00
   0  -1 -14    5.36    3.16
   0  -1 -15  337.56   11.05
   0  -1  15  374.74   11.42
   0  -1  15  414.89   14.00
   0   1 -16    1.82    3.35
   0  -1 -16    1.47    1.69
   0  -1  16   -0.08    2.36
   0   1  16   -3.59    2.95
   0  -1  16    2.81    3.81
   0   1 -17  101.66   10.30
   0  -1 -17   96.45    7.52
   0  -1  17  109.13    8.75
   0   1  17  102.87    9.61
   0  -1  17   99.18    8.94
   0   1  17  130.19   15.95
   0   1 -18    7.85    2.74
   0  -1 -18   -0.50    3.22
   0  -1  18    2.27    1.54
   0   1  18    0.86    2.16
   0  -1  18    6.53    4.24
   0   1  18   -2.91    5.45
   0   1 -19  901.61   30.93
   0  -1 -19  946.41   32.43
   0  -1  19  903.25   30.70
   0   1  19  954.60   33.89
   0   1 -20    1.01    2.29
   0  -1  20    6.69    3.09
   0  -1  20    9.24    8.77
   0   1  20   10.51    4.02
   0  -1 -21  219.01   14.03
   0  -1  21  181.31   14.83
   0   1  21  245.64   14.96
   0  -1 -22   -0.56    3.69
   0  -1  22   -1.85    5.17
   0   1  22    2.59    2.12
   0  -1 -23   73.37    5.63
   0  -1  23   82.30    5.16
   0  -1  23   77.74   17.92
   0   1  23   80.60   17.74
   0  -1 -24   -1.54    4.07
   0  -1  24    3.60    3.83
   0  -1  24    4.16    6.27
   0   1  24    5.92    4.10
   0  -1 -25   76.66    7.02
   0  -1  25   75.20   11.27
   0  -1  25   83.58   20.26
   0   1  25   85.51   16.67
   0  -1 -26    2.09    2.47
   0  -1  26   -0.61    4.09
   0  -1  26   -1.40    6.80
   0   1  26   -2.77    6.85
   0  -1 -27  181.12   18.65
   0  -1  27  197.09   14.03
   0  -1  27  196.88   18.53
   0   1  27  203.61   18.45
   0  -1 -28    0.29    5.58
   0  -1  28    3.98    4.26
   0  -1  28    3.36    2.75
   0   1  28   -0.20    6.72
   0  -1 -29  448.89   26.40
   0  -1  29  437.54   20.67
   0  -1  29  452.97   34.07
   0   1  29  438.26   22.65
   0  -1 -30    4.52    2.40
   0  -1  30    9.83    5.24
   0  -1  30   -5.99    7.16
   0   1  30    5.08    3.53
   0  -1 -31   25.16    6.73
   0  -1  31   29.44    6.21
   0  -1  31   38.90   10.57
   0   1  31   31.37    9.01
   0  -1 -32   -2.53    4.17
   0  -1  32    4.04    1.92
   0  -1  32   -6.08    9.51
   0  -1 -33  344.81   29.80
   0  -1  33  345.57   19.95
   0  -1  33  390.60   42.32
   0   1  33  392.42   25.78
   0  -1 -34    0.01    3.74
   0  -1  34    2.80    3.19
   0  -1  34    7.79    5.15
   0   1  34    1.30    3.08
   0  -1 -35    7.42    4.64
   0  -1  35    5.45    4.34
   0  -1  35    7.34    4.96
   0   1  35   17.57    8.97
   0  -1 -36    2.38    2.78
   0  -1  36   -0.48    3.99
   0  -1  36    2.13    4.47
   0   1  36    6.63    5.98
   0  -1 -37  216.07   25.41
   0  -1  37  240.94   12.35
   0  -1  37  236.98   20.11
   0   1  37  272.88   24.40
   0  -1  38    4.28    2.33
   0  -1  38    6.06    3.46
   0   1  38    5.40    5.64
   0   1  39    4.79    4.48
   0  -1  39   15.71    7.70
   0   1  39    2.58    6.47
   0   1  40    2.01    4.29
   0  -1  40    5.69    5.23
   0   1  40    1.76    4.33
   0  -1  41  102.31   31.50
   0   1  41  132.17   19.42
  -1  -1  -4   62.59   13.42
   1   1   4   50.57   12.07
   1  -1  -4   62.25    5.86
  -1   1   4   64.34    4.96
  -1  -1   4   62.27    3.86
   1   1  -4   60.34    3.72
   1  -1   4   68.74    8.58
  -1   1  -4   58.05    4.89
  -1  -1   4   67.44    6.73
   1   1  -4   66.20    7.28
   1  -1   4   57.60    5.45
  -1   1  -4   57.30    7.09
  -1   1   4   56.47    3.80
   1  -1  -4   52.32    4.39
   1   1   4   62.00    9.21
  -1  -1  -4   56.27    4.46
  -1  -1  -5  221.17    9.32
   1   1   5  193.23    8.42
   1  -1  -5  232.64   10.55
  -1   1   5  227.80    9.70
  -1  -1   5  240.15    9.40
   1   1  -5  225.82    8.70
   1  -1   5  229.25   10.68
  -1   1  -5  223.50   10.51
  -1  -1   5  236.96    9.68
   1   1  -5  226.92    9.37
   1  -1   5  202.46   11.05
  -1   1  -5  189.07   11.51
  -1   1   5  212.43    9.18
   1  -1  -5  211.07    9.20
   1   1   5  245.00   14.45
  -1  -1   6   26.50    2.85
   1  -1   6   28.42    7.44
  -1  -1  -6   27.61    7.47
   1   1   6   23.43    4.40
   1  -1  -6   30.93    5.49
  -1   1   6   31.02    6.61
  -1  -1   6   29.31    4.56
   1  -1   6   38.19    7.13
  -1  -1   6   37.69   11.58
   1   1  -6   30.76    6.11
   1  -1   6   30.49    7.33
  -1   1  -6   25.75    6.04
  -1   1   6   25.30    5.31
   1  -1  -6   24.66    4.74
   1   1   6   37.52    7.32
  -1  -1  -6   27.51    6.30
   1  -1  -7  957.31   15.72
  -1   1   7  895.42   13.18
  -1  -1   7  963.34   14.30
   1   1  -7  956.43   13.94
   1  -1   7  768.31   11.93
  -1   1   7  746.72   15.26
   1  -1  -7  770.35   12.02
   1   1   7  965.90   14.61
   1  -1   8  367.20    7.38
  -1  -1   8  334.87    7.08
  -1  -1  -8  304.39   12.41
   1   1   8  307.11   12.54
   1  -1  -8  373.43    8.44
  -1   1   8  371.89    6.24
  -1  -1   8  377.08    6.69
   1  -1   8  362.31    6.94
  -1  -1   8  386.33    7.55
   1   1  -8  373.83    7.61
   1  -1   8  309.16    7.56
  -1   1  -8  316.13    6.42
  -1   1   8  314.19    7.08
   1  -1  -8  331.68   11.25
   1   1   8  392.84    7.64
   1  -1   9   72.15    9.84
  -1  -1   9   63.97    4.01
  -1  -1  -9   68.27   16.76
   1   1   9   63.25   11.72
   1  -1  -9   71.40    4.25
  -1   1   9   69.54    3.75
  -1  -1   9   78.09    5.44
   1  -1   9   71.60    6.85
  -1  -1   9   70.02    5.63
   1   1  -9   73.58    4.94
   1  -1   9   70.21    7.80
  -1   1   9   67.75    5.17
  -1   1  -9   62.63   10.67
   1  -1  -9   66.58    8.40
   1   1   9   69.98    6.61
  -1  -1  -9   82.82    8.19
   1  -1  10   56.61    4.18
  -1  -1  10   49.38    6.59
  -1  -1 -10   59.70   13.00
   1  -1 -10   57.64    5.78
   1   1  10   44.65   10.10
  -1   1  10   56.99    7.18
  -1  -1  10   50.80    3.86
   1  -1  10   60.44   14.24
  -1  -1  10   63.51    5.80
   1  -1  10   43.51    9.81
   1   1 -10   56.17    4.53
  -1   1  10   51.22   12.41
  -1   1 -10   46.90    3.75
   1  -1 -10   44.20    3.56
   1   1  10   49.82    4.52
  -1  -1 -10   52.95    4.31
   1  -1  11  469.66   11.03
  -1  -1  11  419.64    6.81
   1   1  11  451.90    8.23
  -1   1  11  477.72    8.08
  -1  -1  11  488.56    8.03
  -1  -1  11  514.23   10.47
   1  -1  11  445.93    8.66
  -1   1 -11  437.94    8.24
   1  -1 -11  431.71   14.62
  -1  -1 -11  511.57    9.22
  -1   1 -12   42.96    5.23
   1  -1  12   44.83   10.60
  -1  -1  12   42.25   10.66
  -1  -1 -12   46.11   12.49
   1  -1 -12   43.28    6.10
   1   1  12   39.05    4.32
  -1   1  12   55.38    8.49
  -1  -1  12   58.49   13.07
   1  -1  12   42.01    7.92
   1   1 -12   46.77   11.12
  -1   1  12   52.60   14.06
  -1   1 -12   41.18    4.78
   1   1  12   39.43    9.35
   1  -1 -12   42.35    7.65
  -1  -1 -12   45.27    9.41
  -1   1 -13   17.29    3.86
   1  -1  13   15.40    5.07
  -1  -1 -13   21.22    4.15
  -1  -1  13   15.97    3.55
   1  -1 -13   14.18    3.04
   1   1  13    8.39    4.33
  -1   1  13   18.85    4.22
  -1  -1  13   12.92    5.77
   1  -1  13   17.94    3.42
   1   1 -13   21.97    6.10
  -1   1  13   13.51    3.31
  -1   1 -13   12.13    4.18
   1   1  13    1.66    5.67
   1  -1 -13   16.46    4.12
  -1  -1 -13   14.77    5.64
   1  -1  14    3.13    2.43
  -1  -1 -14   -0.89    3.35
  -1  -1  14    3.72    2.78
   1  -1 -14    3.42    1.79
   1   1  14    4.29    2.64
  -1   1  14    3.87    2.05
  -1  -1  14    5.06    3.27
  -1   1  14    4.70    3.11
   1   1  14    7.60    5.42
   1  -1 -14    1.37    1.70
  -1   1 -15 1479.96   40.75
   1  -1  15 1526.67   42.51
  -1  -1 -15 1456.22   40.72
  -1  -1  15 1483.02   40.43
   1   1  15 1391.00   38.49
  -1   1  15 1465.72   40.74
  -1  -1  15 1660.42   46.78
   1   1  15 1528.64   43.27
   1   1 -16    1.09   22.56
  -1   1 -16    2.69    4.46
   1  -1  16    9.31    5.32
   1  -1 -16   15.38    3.45
  -1  -1  16   12.53    8.53
   1  -1  16   24.97   10.53
  -1   1  16   25.26    7.07
   1   1  16   19.37    5.65
  -1   1 -17  115.96   14.27
   1   1 -17  108.95   12.69
  -1  -1 -17  119.34   10.50
   1  -1 -17  115.50    8.25
   1  -1  17  117.35   10.32
  -1  -1  17  119.40    9.72
  -1   1  17  101.61    7.46
  -1  -1  17  114.28   10.87
   1  -1  17  128.62   10.21
  -1   1  17  121.69   19.09
   1   1  17  119.36   11.05
   1   1 -18   19.06    4.51
  -1   1 -18   26.54    6.29
  -1  -1 -18   23.14    4.91
   1  -1 -18   25.08    6.97
  -1  -1  18   18.28    3.27
  -1   1  18   16.70    3.22
  -1  -1  18   35.44    7.46
   1  -1  18   26.47    6.47
  -1   1  18   24.09    6.95
   1   1  18   25.37    8.10
  -1   1 -19   32.24    8.11
  -1  -1 -19   38.64    7.40
   1  -1 -19   41.47    8.90
  -1  -1  19   34.46    7.50
  -1   1  19   27.43    5.43
  -1  -1  19   45.49   10.85
   1  -1  19   36.63    8.34
  -1   1  19   41.13   10.95
   1   1  19   46.85    8.67
  -1   1 -20    0.80    1.55
  -1  -1 -20   -0.60    2.34
   1  -1 -20    2.54    1.47
  -1  -1  20    2.01    1.28
  -1  -1  20    6.44    3.78
   1  -1  20    2.28    3.58
  -1   1  20   -3.91    4.89
   1   1  20   -7.58    4.81
  -1  -1 -21  188.59   13.89
   1  -1 -21  169.98   10.53
  -1  -1  21  166.81    9.66
  -1  -1  21  183.77   12.65
   1  -1  21  177.18   11.90
  -1   1  21  162.12   12.35
   1   1  21  187.04   12.61
  -1  -1 -22   14.47    3.25
   1  -1 -22   14.07    3.29
  -1  -1  22    8.91    4.68
  -1  -1  22    8.75    6.43
   1  -1  22   18.76    7.09
  -1   1  22   18.13    5.65
   1   1  22   20.51    5.26
  -1  -1 -23  389.29   17.16
   1  -1 -23  346.76   17.03
   1  -1  23  378.46   17.81
  -1  -1  23  386.95   16.38
  -1  -1  23  376.35   17.58
   1  -1  23  417.67   18.63
   1   1  23  378.29   17.40
   1  -1 -24   30.12    7.96
   1  -1  24   28.79    6.99
  -1  -1  24   34.51    8.80
  -1  -1  24   23.95   11.42
   1   1  24   35.78    8.06
  -1  -1 -25  334.98   26.65
   1  -1 -25  330.69   15.10
   1  -1  25  320.73   14.76
  -1  -1  25  294.71   16.60
  -1  -1  25  329.73   16.21
   1  -1  25  370.53   18.03
  -1   1  25  331.86   18.36
   1   1  25  343.22   32.23
  -1  -1 -26    7.77    5.05
   1  -1 -26    4.42    1.63
   1  -1  26   -0.89    4.65
  -1  -1  26    5.13    2.91
  -1  -1  26    8.69    9.10
   1  -1  26   13.65    5.01
   1   1  26    8.24    6.66
   1  -1 -27   24.53    8.21
  -1  -1 -27   22.02    7.69
   1  -1  27   20.45    5.43
  -1  -1  27   12.84    3.00
  -1  -1  27   14.40    5.43
   1  -1  27   25.35   10.56
  -1   1  27   23.94    5.11
   1   1  27   18.56    5.88
   1  -1 -28    6.67    2.77
  -1  -1  28    6.96    3.15
   1  -1  28    9.89    5.50
  -1  -1  28    9.06    5.31
  -1   1  28    3.29    3.88
   1   1  28    7.73    4.93
  -1  -1 -29   90.89   17.84
   1  -1 -29   92.58    7.25
  -1  -1  29   87.00   15.69
   1  -1  29   95.08   10.09
  -1  -1  29   86.09   23.64
   1  -1  29  115.31   15.84
  -1   1  29  117.02   22.45
   1   1  29  122.98   10.07
  -1  -1 -30    5.15    3.84
   1  -1 -30    4.21    2.98
  -1  -1  30    7.63    3.09
   1  -1  30    8.52    5.15
  -1  -1  30    6.80    3.86
   1  -1  30    6.59    6.65
  -1   1  30    6.07    2.83
   1   1  30    9.29    6.79
   1  -1 -31  112.41   18.45
  -1  -1 -31  115.61   12.39
   1  -1  31  108.96   16.54
  -1  -1  31  122.04   16.55
  -1  -1  31  112.97   31.73
   1  -1  31  126.16   23.24
  -1   1  31  121.29   19.33
   1   1  31  135.60   34.34
   1  -1 -32   22.20    5.34
  -1  -1  32   27.75    5.86
   1  -1  32   25.60    6.92
  -1  -1  32   35.78   10.45
   1  -1  32   37.61   12.80
  -1   1  32   37.00   10.42
   1   1  32   33.87   12.80
  -1  -1 -33  382.88   23.94
   1  -1 -33  346.30   19.86
   1  -1  33  333.89   23.95
  -1  -1  33  363.53   20.62
  -1  -1  33  361.45   39.39
   1  -1  33  380.70   34.62
  -1   1  33  377.37   23.87
   1   1  33  363.96   23.09
   1  -1 -34    4.30    2.86
  -1  -1 -34   -0.24    4.86
   1  -1  34   10.44    4.27
  -1  -1  34   -6.11    7.51
   1  -1  34   -0.37    7.34
  -1   1  34   -1.33    5.91
   1   1  34    8.37    8.79
   1  -1 -35    4.99    4.60
  -1  -1 -35   17.10    4.78
  -1  -1  35    6.66    5.57
  -1  -1  35    6.76    6.10
  -1   1  35    8.37    3.69
   1  -1  35   14.17    8.01
   1   1  35   20.88    7.84
  -1  -1 -36   10.29    3.82
   1  -1 -36    5.34    2.54
  -1  -1  36    2.77    1.78
   1  -1  36    2.98    3.08
  -1  -1  36    8.77    4.41
  -1   1  36    9.59    4.29
   1  -1  36   19.28    7.47
   1   1  36    7.84    5.17
  -1  -1 -37  214.03   19.04
   1  -1 -37  233.40   20.15
   1  -1  37  259.18   13.65
   1  -1  37  245.75   31.71
  -1  -1  37  235.58   30.19
  -1   1  37  252.91   36.98
   1   1  37  287.51   20.99
   1  -1  38    6.78    4.54
   1  -1  38   -0.46    7.72
  -1  -1  38    6.06    3.83
  -1   1  38    8.42    7.04
   1   1  38   15.00    7.55
   1  -1  39   15.03    7.67
   1   1  39   19.18    9.53
  -1  -1  39   13.90    8.39
   1  -1  39   27.17   16.18
   1   1  39   22.95   13.44
   1  -1  40    4.02    2.58
   1   1  40    6.40    4.40
  -1  -1  40    6.21    3.18
   1  -1  40    4.45    5.79
   1   1  40    2.23    6.58
   1   1  41   97.63   30.58
  -1  -1  41  158.25   19.25
   1  -1  41  153.40   25.93
  -1   1  41  126.74   25.66
   1   1  41  123.67   36.70
  -2  -1   0  106.42    5.91
   2   1   0  112.46    6.18
   2  -1   0  146.58    8.16
  -2   1   0  135.38    7.75
  -2  -1   0  163.32   10.91
   2   1   0  158.89    9.20
  -2  -1  -1   18.89    5.20
  -2  -1   1   17.26    3.51
   2   1   1   12.86    3.03
   2   1  -1   17.93    5.74
   2  -1  -1   24.14    5.01
  -2   1   1   20.89    3.93
   2  -1   1   24.16    5.73
  -2   1  -1   21.88    5.47
  -2  -1  -1   28.58    4.88
   2   1   1   23.72    6.09
  -2  -1   1   27.21    6.58
   2   1  -1   23.73    5.89
   2  -1   1   13.69    3.64
  -2  -1  -2  209.68   13.55
   2   1   2  211.91    8.56
  -2  -1   2  207.89    8.15
   2   1  -2  255.41    9.97
   2  -1  -2  295.30   12.45
  -2   1   2  273.39   11.26
   2  -1   2  296.80   16.28
  -2   1  -2  258.86   10.44
   2   1   2  292.04   11.27
  -2  -1   2  325.34   12.76
   2   1  -2  284.19   12.23
  -2   1   2  263.22   10.59
   2  -1   2  194.51    8.16
   2  -1  -2  202.40    7.56
  -2   1  -2  248.54    9.75
   2   1   2  304.64   12.66
   2   1  -3 1993.86   25.17
   2  -1  -3 2117.03   28.35
  -2   1   3 2007.75   25.80
   2  -1   3 1973.56   28.95
  -2  -1   3 2205.16   29.96
   2   1  -3 2144.79   29.43
  -2   1   3 1771.05   22.53
   2  -1   3 1518.80   19.85
   2  -1  -3 1468.50   19.04
  -2   1  -3 1647.60   21.19
   2   1   3 2193.45   28.94
  -2  -1  -3 2215.93   29.15
  -2  -1  -4   54.56   10.36
   2   1   4   42.89   10.07
   2   1  -4   55.12    3.19
   2  -1  -4   55.36    5.26
  -2   1   4   52.92    5.38
   2  -1   4   50.80    8.28
  -2   1  -4   59.47    5.32
  -2  -1   4   57.88    4.90
   2   1  -4   56.48    8.49
  -2   1   4   52.19    9.22
   2  -1   4   35.71    4.68
   2  -1  -4   34.62    5.16
  -2   1  -4   49.33    4.99
   2   1   4   63.30    5.77
  -2  -1  -4   65.18    6.37
  -2  -1  -5   41.16    9.03
   2   1   5   38.88    8.65
   2  -1  -5   57.93    5.91
  -2   1   5   61.89    6.19
   2  -1   5   61.62   12.70
  -2  -1   5   59.42    6.09
   2   1  -5   56.35    8.56
  -2   1   5   45.61    9.77
   2  -1   5   42.89    9.00
  -2   1  -5   44.82    7.76
   2  -1  -5   39.29    7.54
   2   1   5   63.59   13.27
  -2  -1  -5   51.52    5.36
   2  -1   6   57.31    4.05
  -2  -1  -6   59.92   12.24
   2   1   6   45.57   12.35
   2  -1  -6   65.33    7.02
  -2   1   6   61.31    4.48
   2  -1   6   55.98    5.01
  -2  -1   6   67.55    5.97
   2   1  -6   63.84    7.72
  -2   1   6   52.91    5.49
   2  -1   6   62.79   14.70
  -2   1  -6   51.82    4.64
   2  -1  -6   52.04    4.49
   2   1   6   85.13   10.80
  -2  -1  -6   72.59    5.69
   2  -1   7   26.78    6.30
  -2  -1  -7   30.40    7.23
   2   1   7   26.70    6.51
   2  -1  -7   45.37    9.30
  -2   1   7   38.53    4.39
   2  -1   7   41.09    9.23
  -2  -1   7   39.42   10.13
   2   1  -7   42.68   10.91
  -2   1   7   30.48    7.31
   2  -1   7   32.82    8.41
  -2   1  -7   31.16    8.61
   2  -1  -7   34.95    8.34
   2   1   7   46.26    9.64
  -2  -1  -7   33.97    4.35
   2  -1   8  347.70    6.85
  -2  -1  -8  268.63    5.55
  -2  -1   8  275.92   10.29
   2   1   8  272.06   10.96
   2  -1  -8  367.04    6.43
  -2   1   8  357.92    4.28
  -2  -1   8  362.72    6.31
   2  -1   8  339.35   10.11
  -2  -1   8  374.12   11.95
   2   1  -8  366.83   14.24
   2  -1   8  288.25    7.25
  -2   1   8  276.57    4.63
  -2   1  -8  295.92    6.13
   2  -1  -8  281.36   11.56
   2   1   8  386.40    9.76
  -2  -1  -8  395.96    7.65
   2  -1   9   87.84    5.15
  -2  -1  -9   65.70    8.18
  -2  -1   9   73.11    4.37
   2   1   9   68.91    4.28
   2  -1  -9   90.49    4.54
  -2   1   9  100.90    7.26
  -2  -1   9   87.89    4.51
   2  -1   9   77.97   11.51
  -2  -1   9   96.35    5.85
   2   1  -9   91.98    5.33
  -2   1   9   72.73   11.32
   2  -1   9   73.46    5.62
  -2   1  -9   69.77    5.95
   2  -1  -9   67.42    4.64
   2   1   9  106.28    7.72
  -2  -1  -9  102.16   10.37
   2  -1  10  148.40   11.58
  -2  -1 -10  124.56   10.99
  -2  -1  10  115.36    5.37
   2   1  10  122.84    8.19
   2  -1 -10  148.35    6.58
  -2   1  10  159.59    9.41
  -2  -1  10  148.26    6.64
   2  -1  10  142.36    7.62
  -2  -1  10  158.52    9.83
   2   1 -10  142.64    6.87
   2  -1  10  134.83    9.28
  -2   1  10  120.46   11.38
   2  -1 -10  119.43    6.20
  -2   1 -10  117.60    7.51
   2   1  10  152.47    7.30
  -2  -1 -10  163.59   12.11
   2  -1  11  559.74    9.97
  -2  -1 -11  470.65    9.24
  -2   1  11  592.46   10.34
  -2  -1  11  582.41    8.98
   2  -1  11  556.59   10.37
  -2  -1  11  624.23   12.29
  -2   1  11  485.76   10.10
   2  -1  11  490.52    9.81
  -2   1 -11  487.06    8.62
   2   1  11  632.77   12.45
  -2  -1 -11  615.36   10.85
   2  -1  12  324.20   13.34
  -2  -1 -12  284.77   14.66
   2  -1 -12  348.16   13.13
  -2   1  12  341.78   10.43
  -2  -1  12  319.10   10.20
  -2  -1  12  361.39   18.46
   2   1 -12  373.86   12.27
  -2   1  12  296.11   10.47
   2  -1  12  292.55   10.11
   2  -1 -12  289.10   16.07
  -2   1 -12  298.21   10.21
   2   1  12  364.10   18.23
  -2  -1 -12  349.39   11.50
   2  -1  13    6.04    2.46
  -2  -1 -13    2.28    2.69
   2   1  13    5.28    2.64
   2  -1 -13    6.32    3.11
  -2  -1  13    7.73    2.07
  -2  -1  13   11.31    3.27
   2   1 -13   11.60    3.08
  -2   1  13    7.39    4.17
   2  -1  13    7.00    3.87
   2  -1 -13    4.42    3.48
   2   1  13    7.50    5.04
  -2   1 -13   10.31    3.49
  -2  -1 -13    2.85    2.19
   2  -1  14   40.64    8.93
  -2  -1 -14   41.79   15.20
   2   1  14   30.07    9.40
   2  -1 -14   38.85    8.08
  -2  -1  14   38.63    3.08
  -2   1  14   41.62    5.84
  -2  -1  14   37.79    7.46
  -2  -1  14   50.58   17.27
  -2   1  14   47.72   11.30
   2  -1  14   41.45    8.51
   2   1  14   45.14   12.53
   2  -1 -14   31.02    8.26
  -2   1 -15   57.76   12.76
  -2  -1 -15   67.71   16.60
   2  -1  15   53.59    3.69
   2  -1 -15   69.01    7.38
  -2  -1  15   52.12    4.79
  -2   1  15   64.42    7.70
  -2  -1  15   59.80    5.04
  -2  -1  15   75.00   21.78
  -2   1  15   58.30    4.85
   2  -1  15   62.48    6.40
   2   1  15   78.12   16.44
  -2   1 -16   34.78    7.50
  -2  -1 -16   34.65    6.05
   2  -1 -16   30.56    5.91
  -2  -1  16   28.70    4.05
  -2   1  16   27.31    6.69
  -2  -1  16   31.21    7.14
  -2  -1  16   37.72   11.37
  -2   1  16   42.34    8.50
   2  -1  16   39.74   12.08
   2   1  16   37.30   10.32
  -2   1 -17   69.17   14.07
  -2  -1 -17   60.95   13.40
   2  -1 -17   53.29    6.65
  -2  -1  17   58.29    5.59
  -2   1  17   47.09    8.91
  -2  -1  17   48.88    7.15
  -2  -1  17   80.78   16.82
  -2   1  17   60.60   18.04
   2  -1  17   60.50   15.87
   2   1  17   65.28   13.98
  -2  -1 -18   64.59   21.65
   2  -1 -18   70.39   13.64
  -2   1  18   63.02   12.13
  -2  -1  18   72.49   20.53
  -2   1  18   81.22   15.83
   2  -1  18   91.25   21.00
   2   1  18   84.14   18.47
   2  -1 -19 1231.23   42.38
  -2  -1  19 1230.02   41.69
  -2  -1  19 1250.18   43.92
   2   1  19 1239.24   43.27
   2  -1 -20  138.41   28.94
  -2   1  20  114.42    8.80
  -2  -1  20  137.05   19.33
  -2  -1  20  160.07   38.40
  -2   1  20  155.14   16.02
   2   1  20  156.52   14.35
  -2  -1 -21  170.52   14.47
   2  -1 -21  157.90   11.21
  -2  -1  21  153.74    9.36
  -2   1  21  130.05   11.03
   2  -1  21  151.91   10.38
  -2  -1  21  149.68   11.50
  -2  -1  21  154.77   23.08
  -2   1  21  164.68   11.28
   2   1  21  169.25   11.53
  -2  -1 -22   23.56    6.88
   2  -1 -22   21.06    4.93
  -2  -1  22   13.58    2.98
   2  -1  22   21.72    4.71
  -2  -1  22    6.11    3.62
  -2  -1  22   21.13    9.14
  -2   1  22   18.48    6.47
   2  -1  22   24.55    6.25
   2   1  22   15.96    4.43
  -2  -1 -23   40.24    7.16
   2  -1 -23   36.59    7.97
  -2  -1  23   27.24    5.17
   2  -1  23   50.69   13.04
  -2  -1  23   43.59    8.03
  -2  -1  23   39.32   10.08
  -2   1  23   44.17    9.02
   2  -1  23   44.14   13.61
   2   1  23   55.55   13.39
  -2  -1 -24    5.56    2.77
   2  -1 -24    5.18    3.15
  -2  -1  24    2.29    2.58
   2  -1  24   -0.25    2.29
  -2  -1  24    1.22    3.45
  -2   1  24    4.97    2.91
   2   1  24    0.05    5.24
  -2  -1 -25  280.00   13.51
   2  -1 -25  258.82   22.41
  -2  -1  25  296.09   17.12
   2  -1  25  286.69   13.82
  -2  -1  25  309.53   16.00
   2  -1  25  285.71   14.34
  -2   1  25  328.84   27.88
   2   1  25  307.18   15.33
  -2  -1 -26   19.79    5.03
   2  -1 -26   14.68    3.67
  -2  -1  26    7.48    5.41
   2  -1  26   25.07    6.70
  -2  -1  26   18.49    9.75
   2  -1  26   19.16    6.90
  -2   1  26   17.06    4.48
   2   1  26   19.72    6.43
  -2  -1 -27  126.28   11.44
   2  -1 -27  122.09   13.77
  -2  -1  27  137.44   10.08
   2  -1  27  130.26   17.56
  -2  -1  27  150.13   15.01
   2  -1  27  141.03   14.30
  -2   1  27  149.09   35.31
   2   1  27  138.60   23.32
   2  -1 -28  175.56   10.88
   2  -1  28  164.41   17.31
  -2  -1  28  177.65   13.41
   2  -1  28  201.94   26.60
  -2   1  28  154.58   15.23
   2   1  28  180.23   34.53
  -2  -1 -29  311.03   24.73
   2  -1 -29  310.05   20.66
  -2  -1  29  292.01   19.98
   2  -1  29  351.51   20.61
  -2  -1  29  319.23   33.86
  -2   1  29  307.16   25.56
   2  -1  29  305.18   25.28
   2   1  29  288.68   29.80
  -2  -1 -30   34.51    7.13
   2  -1 -30   36.26    9.15
  -2  -1  30   24.25    7.39
   2  -1  30   34.04    9.70
  -2  -1  30   35.16    8.00
  -2   1  30   47.47    6.62
   2  -1  30   33.37    6.34
   2   1  30   35.80   11.31
   2  -1 -31    3.60    2.14
  -2  -1 -31    6.52    3.20
   2  -1  31    6.28    4.21
  -2  -1  31   14.91    7.23
  -2   1  31    2.73    3.54
   2  -1  31   -2.02    6.24
   2   1  31    2.94    4.83
   2  -1 -32    5.74    3.50
  -2  -1 -32   10.23    4.14
  -2  -1  32    3.69    2.71
   2  -1  32    2.24    4.34
  -2  -1  32    4.74    3.24
   2  -1  32   10.72    4.84
  -2   1  32    9.60    3.12
   2   1  32   15.62    5.93
  -2  -1 -33  244.11   24.86
   2  -1 -33  269.54   19.51
  -2  -1  33  281.07   19.24
   2  -1  33  272.27   18.28
  -2  -1  33  269.35   38.64
   2  -1  33  284.01   29.29
  -2   1  33  324.91   21.12
   2   1  33  265.42   25.06
   2  -1 -34    7.57    2.39
  -2  -1 -34    8.51    4.58
   2  -1  34   16.99    5.51
  -2  -1  34    0.03    4.20
  -2   1  34    3.76    3.76
   2  -1  34    0.46    2.82
   2   1  34    4.20    6.55
   2  -1 -35    3.09    2.25
   2  -1  35    2.72    2.26
  -2  -1  35    4.88    3.91
   2  -1  35    5.23    6.84
  -2   1  35   10.50    4.28
   2   1  35    6.59    6.52
  -2  -1 -36   51.48    8.64
   2  -1  36   55.57   16.74
  -2  -1  36   36.99   13.23
   2  -1  36   48.12   21.25
  -2   1  36   54.72   14.08
   2   1  36   46.31   13.80
  -2  -1 -37  165.50   25.08
   2  -1  37  198.42   16.86
  -2  -1  37  202.91   18.98
  -2   1  37  199.47   22.37
   2  -1  37  231.34   39.04
   2   1  37  207.03   28.03
   2  -1  38   13.57    6.04
  -2  -1  38   12.43    5.75
  -2   1  38   15.50    8.74
   2  -1  38    6.78   10.56
   2   1  38    6.78    5.64
   2  -1  39   -2.04    4.32
   2   1  39    7.21    5.84
  -2  -1  39    1.53    4.15
  -2   1  39    1.74    2.96
   2  -1  39    5.08    3.79
   2   1  39    0.47    5.92
   2  -1  40    9.98    5.03
   2   1  40   10.01    5.68
  -2  -1  40    9.14    6.04
   2  -1  40   11.99    7.13
  -2   1  40   19.10    7.75
   2   1  40   20.23   10.18
   2  -1  41   56.08   19.51
  -2  -1  41   67.70   24.24
   2  -1  41   69.24   33.22
  -2   1  41   62.61   32.78
   2   1  41   72.92   20.44
  -3  -1   0    0.54    1.00
   3   1   0    0.25    2.28
   3  -1   0    1.57    2.96
  -3   1   0    0.42    1.69
  -3  -1   0   -0.56    2.65
   3   1   0    0.83    3.57
   3  -1   0    0.77    0.53
   3  -1   0   -0.33    0.48
  -3  -1  -1  283.92    7.38
  -3  -1   1  295.41    7.37
   3   1  -1  291.54    6.28
   3   1   1  269.41   10.83
   3  -1  -1  390.42    8.89
   3  -1   1  392.56    7.59
  -3   1   1  371.46    6.32
  -3   1  -1  366.23    6.67
  -3  -1  -1  416.08    7.89
   3   1   1  391.16   15.49
  -3  -1   1  413.11    8.29
   3   1  -1  415.79    7.66
   3  -1  -1  406.61    6.02
   3  -1   1  381.43    6.21
  -3   1  -1  420.95    6.79
  -3  -1   2  118.95    6.54
  -3  -1  -2  100.22    7.95
   3   1   2   96.38    5.90
   3   1  -2  112.55    7.77
   3  -1  -2  159.99   11.08
  -3   1   2  139.61    6.32
   3  -1   2  146.23    7.17
  -3   1  -2  150.15    6.97
   3   1   2  159.58    7.38
  -3  -1   2  160.84    7.01
  -3   1   2  161.85    7.00
   3   1  -2  162.85    7.96
   3  -1  -2  143.16    5.66
   3  -1   2  134.22    5.76
  -3   1  -2  162.37    7.18
   3   1   2  166.31    7.71
  -3  -1   3    7.11    1.99
  -3  -1  -3    2.46    3.41
   3   1   3    2.52    2.24
   3   1  -3    7.41    1.89
   3  -1  -3   10.17    2.89
  -3   1   3    8.07    1.52
   3  -1   3    7.79    3.32
  -3   1  -3   11.37    2.43
   3   1   3   17.33    3.78
  -3  -1   3   11.49    3.82
   3   1  -3    7.82    3.95
  -3   1   3    7.89    1.96
   3  -1  -3    8.43    2.02
   3  -1   3    8.14    1.83
  -3   1  -3   10.69    2.52
   3   1   3   14.04    4.15
  -3  -1   4    8.24    1.76
  -3  -1  -4    7.97    3.17
   3   1   4    2.33    1.58
   3   1  -4    5.43    1.10
   3  -1  -4    8.92    3.35
  -3   1   4    9.66    2.18
   3  -1   4    8.40    3.06
  -3   1  -4    0.79    3.66
  -3  -1   4    6.01    3.58
   3   1  -4    3.03    4.32
  -3   1   4   10.63    2.41
   3  -1  -4    7.94    1.96
   3  -1   4    6.90    1.91
  -3   1  -4    7.93    2.25
   3   1   4    6.05    2.94
  -3  -1  -4    6.31    3.26
   3  -1   5   24.87    6.22
  -3  -1  -5   26.63    9.12
   3   1   5   22.60    5.25
   3   1  -5   28.90    3.01
   3  -1  -5   30.36    3.44
  -3   1   5   29.33    2.89
   3  -1   5   30.89    8.30
  -3  -1   5   40.89    8.33
   3   1  -5   34.50    6.94
  -3   1   5   41.97    5.66
   3  -1  -5   27.86    5.12
   3  -1   5   29.89    3.37
  -3   1  -5   28.77    5.58
   3   1   5   42.52   10.64
  -3  -1  -5   38.27    7.19
   3  -1   6  378.96    7.55
  -3  -1  -6  315.65    7.46
   3  -1  -6  428.78    7.22
  -3   1   6  437.30    8.00
   3  -1   6  426.71    8.02
  -3  -1   6  465.58   12.82
   3   1  -6  460.52    8.80
  -3   1   6  432.83   10.98
   3  -1  -6  349.06    6.13
   3  -1   6  341.19    6.81
  -3   1  -6  402.44    7.09
   3   1   6  475.70   15.31
  -3  -1  -6  463.53    8.13
   3  -1   7  655.74   10.71
  -3  -1  -7  524.88    9.90
   3  -1  -7  727.66   12.03
  -3   1   7  694.66   10.08
  -3  -1   7  796.73   12.54
   3   1  -7  737.33   14.99
  -3   1   7  668.66   10.86
   3  -1   7  555.74   12.27
  -3   1  -7  613.95   13.06
   3   1   7  747.10   13.85
  -3  -1  -7  791.64   12.78
   3  -1   8  416.80    8.01
   3   1   8  344.12   12.44
   3  -1  -8  486.48   10.17
  -3   1   8  462.52    8.67
  -3  -1   8  500.83    9.41
   3   1  -8  488.85    9.31
  -3   1   8  438.92    8.95
   3  -1  -8  367.11    6.64
   3  -1   8  343.62    7.60
  -3   1  -8  414.91    8.53
   3   1   8  499.99    9.05
   3  -1   9  112.31    6.75
   3   1   9   95.94    5.69
   3  -1  -9  122.07    5.54
  -3   1   9  122.68    6.05
   3  -1   9  136.28   16.86
  -3  -1   9  131.11   12.69
   3   1  -9  126.07    6.81
  -3   1   9  106.58    7.93
   3  -1   9   99.67   10.86
   3  -1  -9   93.79    8.42
  -3   1  -9  112.71   10.00
   3   1   9  137.20    7.09
  -3  -1  -9  136.95   13.26
   3  -1  10    5.29    2.10
  -3  -1 -10    4.63    2.24
   3   1  10   10.98    3.03
   3  -1 -10    6.48    1.51
  -3   1  10    6.67    2.31
   3  -1  10    4.19    3.26
  -3  -1  10    3.57    1.76
   3   1 -10    6.54    3.39
  -3   1  10    4.17    1.68
   3  -1  10    6.97    1.57
   3  -1 -10    2.93    1.47
  -3   1 -10    2.82    1.87
   3   1  10   -1.09    3.78
  -3  -1 -10    8.80    2.15
   3  -1  11  122.74    8.74
  -3  -1 -11  115.99   11.41
   3   1  11  101.85   10.00
   3  -1 -11  128.70   10.30
  -3  -1  11  117.36    6.30
  -3   1  11  124.17    7.10
   3  -1  11  101.90    7.90
  -3  -1  11  132.72   16.07
   3   1 -11  126.43    8.82
  -3   1  11  111.74    7.11
   3  -1  11  108.51    7.42
   3  -1 -11  118.67    7.51
  -3   1 -11  122.67   10.59
   3   1  11  134.66    9.62
  -3  -1 -11  117.30   10.54
   3  -1  12   25.70    5.38
   3  -1 -12   37.10    4.41
  -3   1  12   31.49    6.23
  -3  -1  12   35.11    3.18
   3  -1  12   37.05    8.58
  -3  -1  12   50.77   10.72
  -3   1  12   29.95    8.12
   3   1 -12   34.89    7.23
   3  -1  12   38.43    6.98
   3  -1 -12   27.03    6.42
   3   1  12   34.74    7.77
  -3   1 -12   28.11    6.25
  -3  -1 -12   32.90    7.75
  -3  -1 -13   10.15    3.19
   3  -1 -13   10.65    1.90
  -3  -1  13    5.97    1.14
  -3   1  13   -2.91    6.62
  -3  -1  13    4.25    1.24
   3  -1  13    2.99    5.77
  -3  -1  13   10.64    7.06
  -3   1  13    8.71    5.31
   3   1 -13    5.69    3.70
   3  -1  13   -1.00    3.60
   3  -1 -13    7.32    4.74
   3   1  13    4.81    3.38
  -3   1 -13    7.20    2.26
   3  -1 -14  241.09   17.35
  -3  -1  14  209.56   13.18
  -3  -1  14  215.28   13.88
   3  -1  14  217.99   18.02
  -3  -1  14  244.83   16.78
  -3   1  14  197.79   18.22
   3  -1  14  220.98   18.34
   3   1  14  239.63   16.07
   3  -1 -15 1182.97   33.35
  -3   1  15 1191.55   36.55
  -3  -1  15 1154.10   31.47
   3  -1  15 1077.17   31.90
  -3  -1  15 1205.70   34.88
  -3   1  15 1056.48   30.28
   3  -1  15 1093.99   33.68
   3   1  15 1233.06   38.03
  -3  -1 -16  265.72   27.48
   3  -1 -16  285.63   18.36
  -3  -1  16  249.57   15.57
  -3   1  16  290.05   18.89
  -3  -1  16  258.74   21.82
   3  -1  16  256.24   17.92
  -3  -1  16  288.37   20.68
  -3   1  16  262.39   17.78
   3   1  16  312.97   20.55
  -3  -1 -17   16.84    7.00
   3  -1 -17   18.56    5.07
  -3  -1  17   13.95    2.81
  -3   1  17   20.78    4.31
  -3  -1  17    9.50    3.66
   3  -1  17   11.85    4.73
  -3  -1  17   25.32    6.77
  -3   1  17   20.54    7.41
   3  -1  17   15.13    5.02
   3   1  17   15.83    4.59
  -3  -1 -18   55.84   11.13
   3  -1 -18   42.11    4.04
  -3  -1  18   35.52    4.14
  -3   1  18   41.17    6.88
  -3  -1  18   43.16    5.44
   3  -1  18   33.63    8.50
  -3  -1  18   55.26   15.00
  -3   1  18   45.14    9.31
   3  -1  18   39.71   10.54
   3   1  18   43.24   10.90
  -3  -1 -19   58.40   13.64
   3  -1 -19   57.04    7.54
  -3  -1  19   48.31    5.60
  -3   1  19   52.24    6.81
   3  -1  19   57.83   14.62
  -3  -1  19   56.32    7.82
  -3  -1  19   73.37   13.40
  -3   1  19   58.77   13.43
   3  -1  19   76.70   17.63
   3   1  19   73.69   16.32
  -3  -1 -20    5.98    4.92
   3  -1 -20    7.47    2.55
  -3   1  20    1.61    1.36
  -3  -1  20    3.05    2.20
   3  -1  20   -0.46    4.40
  -3  -1  20    2.78    5.15
  -3   1  20    3.69    3.54
   3  -1  20   -0.11    5.07
   3   1  20   -0.55    4.47
   3  -1 -21  246.53   13.82
  -3   1  21  240.64   14.03
  -3  -1  21  252.76   13.83
   3  -1  21  289.96   20.29
  -3  -1  21  278.18   17.32
  -3   1  21  252.61   14.97
   3  -1  21  283.66   25.65
   3   1  21  263.90   16.16
   3  -1 -22  111.09    6.95
  -3  -1  22   83.90    5.71
  -3   1  22   78.76    4.95
  -3  -1  22   97.56    4.18
   3  -1  22  113.45   28.86
  -3  -1  22  101.81   24.01
  -3   1  22   95.50   21.85
   3  -1  22  143.45   28.78
   3   1  22  108.59    9.35
  -3  -1  23  381.83   17.23
  -3  -1  23  381.11   18.79
  -3   1  23  392.42   18.71
   3   1  23  380.03   17.73
  -3  -1  24  416.04   17.70
  -3  -1  24  415.18   20.85
   3  -1  24  450.97   22.11
   3   1  24  447.47   25.61
   3  -1 -25  235.92   26.26
  -3  -1  25  188.70   10.85
  -3  -1  25  230.01   14.84
   3  -1  25  246.43   19.92
  -3  -1  25  231.16   17.06
  -3   1  25  247.32   28.06
   3  -1  25  269.83   21.84
   3   1  25  257.79   16.18
  -3  -1 -26  162.69   18.94
   3  -1 -26  133.36   12.80
  -3  -1  26  121.12    7.84
  -3  -1  26  140.23    8.58
   3  -1  26  149.58   20.09
  -3  -1  26  148.35   33.85
  -3   1  26  136.51   14.42
   3   1  26  158.66   21.02
  -3  -1 -27   16.28    6.85
   3  -1 -27   10.80    4.50
  -3  -1  27    9.17    4.66
   3  -1  27   10.98    5.20
  -3  -1  27    1.58    3.79
  -3   1  27   17.93    7.20
   3  -1  27    2.02    6.10
   3   1  27    9.19    4.26
  -3  -1 -28   64.25   11.98
   3  -1 -28   52.64    7.96
  -3  -1  28   46.06   12.28
   3  -1  28   51.31   10.61
  -3  -1  28   46.07   15.28
  -3   1  28   53.59   12.91
   3  -1  28   50.26   12.45
   3   1  28   59.97   14.20
  -3  -1 -29  158.25    9.72
   3  -1 -29  133.15   10.83
  -3  -1  29  156.50    8.74
   3  -1  29  150.76   10.05
  -3  -1  29  144.39   16.09
  -3   1  29  168.26   14.34
   3   1  29  157.26   30.41
  -3  -1 -30   37.54    9.43
   3  -1 -30   27.93    4.58
  -3  -1  30   21.70    4.84
   3  -1  30   30.89    6.79
  -3  -1  30   26.36    8.33
  -3   1  30   34.29    6.83
   3  -1  30   39.35   10.78
   3   1  30   30.78    7.74
  -3  -1 -31   56.59    6.75
   3  -1 -31   32.26    7.05
  -3  -1  31   32.86    9.45
   3  -1  31   40.26    7.56
  -3  -1  31   36.41    7.41
  -3   1  31   38.64   11.01
   3  -1  31   49.46    9.44
   3   1  31   42.93    9.20
  -3  -1 -32   95.96   16.05
  -3  -1  32  107.46    5.16
   3  -1  32   90.99   26.19
  -3  -1  32   95.64   24.59
  -3   1  32  123.24   33.25
   3  -1  32   99.09   28.55
   3   1  32   89.21   19.26
  -3  -1 -33  334.22   33.18
   3  -1  33  275.31   21.56
  -3  -1  33  286.61   24.40
  -3   1  33  279.37   31.39
   3  -1  33  285.18   24.53
   3   1  33  296.00   32.42
   3  -1  34   29.12    8.02
  -3  -1  34   28.51    7.08
  -3   1  34   10.31    4.96
   3  -1  34   25.37    9.24
   3   1  34   23.11    4.05
   3  -1  35    6.83    3.87
  -3  -1  35    3.43    6.37
  -3   1  35    7.02    4.13
   3  -1  35    4.00    4.52
   3   1  35    6.73    4.80
  -3  -1 -36   22.65    8.68
   3  -1  36   19.46    5.30
  -3  -1  36    9.17    4.41
  -3   1  36   15.50    6.48
   3  -1  36   24.10    6.56
   3   1  36   24.57   11.66
   3  -1  37  113.18    7.61
  -3  -1  37   98.36   27.60
  -3   1  37   97.94   24.22
   3  -1  37   88.40   23.89
   3   1  37   86.11   29.10
   3  -1  38   31.91   10.22
   3   1  38   31.92   14.21
  -3  -1  38   37.12   12.58
  -3   1  38   40.07   13.89
   3  -1  38   42.92   16.78
   3   1  38   48.27   15.94
   3  -1  39   19.10    9.77
   3   1  39   31.08   11.31
  -3  -1  39   26.25   10.80
  -3   1  39   15.39    4.36
   3  -1  39   33.08    9.49
   3   1  39   19.36    8.17
   3  -1  40   16.63    9.67
   3   1  40   13.64    7.76
  -3  -1  40   18.31    6.50
   3  -1  40   24.67    6.54
   3   1  40    8.56   12.27
   3  -1  41   48.13   14.65
   3   1  41   58.21   24.21
  -3  -1  41   69.11   19.46
  -3   1  41  105.51   16.58
   3  -1  41   72.17   26.91
   3   1  41   63.73   25.82
  -4  -1   0   54.08    6.87
   4   1   0   44.46    8.60
   4  -1   0   73.26   12.18
  -4   1   0   61.57    5.52
  -4  -1   0   70.62    6.07
   4   1   0   70.69    5.42
   4  -1   0   68.82    3.42
   4  -1   0   67.91    4.40
  -4  -1   1  260.55   10.31
  -4  -1  -1  264.22   11.14
   4   1  -1  217.81    8.87
   4   1   1  217.29    9.06
   4  -1  -1  315.66   12.50
   4  -1   1  321.77   17.74
  -4   1   1  309.14   12.68
  -4   1  -1  295.59   13.34
  -4  -1  -1  351.26   16.20
  -4   1   1  344.96   12.91
   4  -1   1  335.32   12.76
  -4  -1   1  360.98   16.05
   4   1   1  334.11   12.94
   4   1  -1  332.27   13.87
   4  -1  -1  336.63   12.54
   4  -1   1  333.62   12.62
  -4  -1   2   43.07    6.71
  -4  -1  -2   45.83   13.62
   4   1   2   38.90    9.98
   4   1  -2   35.13    7.27
   4  -1  -2   65.74    8.77
  -4   1   2   53.10    4.84
   4  -1   2   61.69   12.54
  -4   1  -2   59.43    5.61
   4   1   2   59.85    4.02
  -4   1   2   57.96    3.44
  -4  -1   2   56.82    7.54
   4   1  -2   60.88    5.78
   4  -1  -2   54.48    2.71
   4  -1   2   58.35    6.95
  -4   1  -2   53.10    5.33
   4   1   2   53.99    5.47
  -4  -1   3 1341.80   17.84
  -4  -1  -3 1154.11   16.79
   4   1  -3 1114.42   15.38
   4  -1  -3 1515.36   21.18
  -4   1   3 1433.11   19.51
   4  -1   3 1437.88   21.13
   4   1   3 1614.38   22.11
  -4  -1   3 1624.40   22.83
  -4   1   3 1610.98   20.74
   4   1  -3 1585.06   21.71
   4  -1  -3 1492.84   19.15
   4  -1   3 1470.28   19.26
  -4   1  -3 1604.70   21.03
   4   1   3 1642.52   22.81
   4  -1   4    0.86    1.71
  -4  -1  -4    0.64    2.16
   4   1   4    0.79    1.63
   4   1  -4    0.46    1.00
   4  -1  -4   -2.67    1.68
  -4   1   4    2.48    1.83
   4  -1   4    3.62    2.91
   4   1   4    1.22    2.06
  -4  -1   4    4.24    2.53
  -4   1   4    2.99    1.24
   4   1  -4    2.35    2.40
   4  -1  -4    1.51    0.87
   4  -1   4    1.21    0.77
  -4   1  -4    2.29    1.59
   4   1   4    2.47    2.73
   4  -1   5  356.66    7.25
  -4  -1  -5  319.37    7.43
   4   1   5  287.25    9.92
   4   1  -5  340.13    6.43
   4  -1  -5  430.35    7.12
  -4   1   5  408.76    8.78
   4  -1   5  371.95    7.51
   4   1  -5  403.55    6.68
  -4  -1   5  437.77   12.10
   4   1  -5  439.27    8.93
  -4   1   5  457.48    8.00
   4  -1  -5  377.24    6.17
   4  -1   5  379.81    7.20
  -4   1  -5  428.02    8.10
   4   1   5  461.76    8.86
  -4  -1  -5  453.80    8.19
   4  -1   6  360.54   10.18
  -4  -1  -6  277.54   15.44
   4   1   6  258.78   10.57
   4   1  -6  318.08    5.53
   4  -1  -6  384.44    7.58
  -4   1   6  354.13   13.49
   4   1  -6  371.73    6.73
   4  -1   6  375.34   11.56
  -4  -1   6  398.46    9.67
   4   1  -6  391.26    9.96
  -4   1   6  388.32    8.61
   4  -1  -6  337.25    6.29
   4  -1   6  332.32    5.05
  -4   1  -6  376.68    9.65
   4   1   6  403.00    9.40
  -4  -1  -6  423.74    9.63
   4  -1   7  119.48    8.43
  -4  -1  -7  110.24    6.72
   4   1   7   95.95    7.63
   4   1  -7  127.89    5.28
   4  -1  -7  134.22    6.00
   4   1  -7  134.85    5.28
  -4   1   7  138.67    8.39
   4  -1   7  144.03   11.82
  -4  -1   7  152.15    8.06
   4   1  -7  143.87    6.79
   4  -1  -7  104.16    6.77
   4  -1   7  119.77    6.18
  -4   1  -7  138.34    6.28
   4   1   7  154.18    9.00
  -4  -1  -7  149.06    7.18
   4  -1   8   56.04   13.84
  -4  -1  -8   47.83   15.41
   4   1   8   42.38   10.04
   4  -1  -8   65.02    7.61
  -4   1   8   66.55    6.45
   4  -1   8   57.12    4.91
  -4  -1   8   69.93    8.98
  -4   1   8   65.18   10.38
   4   1  -8   63.23    9.31
   4  -1  -8   54.34    4.03
   4  -1   8   58.03    8.22
  -4   1  -8   66.75    8.67
   4   1   8   79.52   16.90
  -4  -1  -8   65.30    5.59
   4  -1   9   44.02   11.98
  -4  -1  -9   54.15   16.65
   4   1   9   43.51   11.69
   4  -1  -9   73.42    5.69
  -4   1   9   68.57    7.21
   4  -1   9   66.36   13.88
  -4  -1   9   80.75   11.41
   4   1  -9   71.10   15.90
  -4   1   9   84.88   14.53
   4  -1  -9   56.48    4.17
   4  -1   9   53.15    5.97
  -4   1  -9   60.18    7.76
   4   1   9   73.09    7.72
  -4  -1  -9   73.24   12.88
   4  -1 -10 1018.77   28.20
  -4   1  10 1012.26   28.18
   4  -1  10  933.83   27.02
  -4  -1  10 1103.51   31.32
   4   1 -10 1056.30   29.96
  -4   1  10 1008.48   28.47
   4  -1 -10  891.76   24.93
   4  -1  10  853.40   24.64
   4   1  10 1075.47   30.84
  -4   1 -10  964.38   30.70
  -4  -1 -10 1086.78   33.89
  -4  -1 -11  828.30   28.42
   4  -1 -11  953.88   26.94
  -4   1  11  904.35   28.47
   4  -1  11  915.07   39.62
  -4  -1  11 1041.99   32.79
  -4   1  11  927.99   28.00
   4   1 -11 1004.47   28.49
   4  -1 -11  792.09   23.44
   4  -1  11  771.37   23.39
   4   1  11 1011.78   32.42
  -4   1 -11  869.14   26.70
   4  -1 -12  834.63   24.34
   4  -1  12  760.40   27.46
  -4  -1  12  824.30   24.25
  -4   1  12  767.88   22.42
   4   1 -12  789.23   23.67
   4  -1 -12  633.02   19.45
   4   1  12  913.84   28.09
  -4   1 -12  709.86   26.88
  -4  -1 -13    2.15    2.00
   4  -1 -13    2.99    1.91
  -4   1  13   49.28   18.27
   4  -1  13   -0.78    9.38
  -4  -1  13    3.95    3.38
  -4   1  13   -3.96    4.29
   4  -1  13    1.25    2.82
   4  -1 -13   -1.28    2.35
   4   1  13    1.81    2.49
  -4   1 -13    1.65    1.15
  -4  -1 -14    2.58    3.10
   4  -1 -14    6.54    2.59
  -4   1  14    1.85    1.90
  -4  -1  14   11.33    4.79
  -4   1  14    8.21    5.29
   4  -1  14    9.15    3.26
   4  -1 -14    4.01    2.82
   4   1  14    6.72    4.89
  -4  -1 -15  148.62   11.58
   4  -1 -15  179.74   11.58
   4  -1  15  166.26   16.77
  -4  -1  15  183.53   16.26
  -4   1  15  164.60   15.36
   4  -1  15  137.26   10.64
   4   1  15  182.81   15.64
  -4  -1 -16   82.40   17.96
   4  -1 -16   68.41    6.40
  -4   1  16   66.99    7.77
  -4  -1  16   55.57    3.75
  -4  -1  16   67.27    4.37
   4  -1  16   58.90   15.99
  -4  -1  16   86.23   18.51
   4  -1  16   75.64   12.17
   4   1  16   93.13   19.02
  -4  -1 -17  190.81   12.65
   4  -1 -17  187.85   10.51
  -4  -1  17  194.13    9.04
  -4   1  17  204.63    9.60
  -4  -1  17  199.82    9.02
   4  -1  17  169.33   11.01
  -4  -1  17  209.77   14.34
  -4   1  17  186.06   11.59
   4  -1  17  199.21   10.84
   4   1  17  255.55   19.30
  -4  -1 -18  332.06   20.61
   4  -1 -18  353.69   16.93
  -4  -1  18  337.76   14.60
  -4   1  18  362.23   15.73
  -4  -1  18  346.15   14.53
   4  -1  18  308.40   16.97
  -4  -1  18  368.42   17.98
  -4   1  18  330.30   17.29
   4  -1  18  360.61   17.57
   4   1  18  371.22   17.75
   4  -1 -19  388.74   14.10
  -4  -1  19  374.55   11.01
  -4  -1  19  381.43   12.20
   4  -1  19  357.09   12.65
  -4  -1  19  429.92   16.03
  -4   1  19  361.41   19.12
   4  -1  19  403.53   14.69
   4   1  19  416.10   15.03
  -4  -1 -20  645.08   21.50
  -4  -1  20  620.33   17.86
  -4  -1  20  628.23   19.28
   4  -1  20  666.58   20.65
  -4  -1  20  654.61   21.90
  -4   1  20  606.55   20.50
   4   1  20  742.69   25.39
   4  -1 -21   62.17    9.82
  -4  -1  21   48.64    3.63
  -4   1  21   59.26    6.93
  -4  -1  21   30.18    7.42
   4  -1  21   70.11    7.84
  -4  -1  21   68.48   15.71
  -4   1  21   53.10   12.31
   4  -1  21   65.60   13.90
   4   1  21   71.18   18.71
  -4  -1 -22   40.94    7.69
   4  -1 -22   35.83    7.49
  -4  -1  22   25.55    4.47
  -4   1  22   30.50    5.45
  -4  -1  22   30.72    5.18
   4  -1  22   35.15    9.98
  -4  -1  22   38.25    9.10
  -4   1  22   30.86    7.61
   4  -1  22   47.59    9.41
   4   1  22   42.30   10.65
  -4  -1 -23   40.75    8.64
   4  -1 -23   27.79    7.09
  -4  -1  23   19.17    4.55
  -4   1  23   24.53    4.69
  -4  -1  23   28.74    6.12
   4  -1  23   31.66    6.64
  -4  -1  23   30.19   10.24
  -4   1  23   32.05    7.98
   4  -1  23   41.19   17.65
   4   1  23   41.62    7.72
  -4  -1 -24   48.21   10.63
   4  -1 -24   37.16    7.53
  -4  -1  24   22.42    4.23
  -4   1  24   26.20    5.07
  -4  -1  24   30.74    6.12
   4  -1  24   41.39    8.59
  -4  -1  24   27.51    8.36
  -4   1  24   39.84    8.15
   4  -1  24   45.67   11.55
   4   1  24   37.48    7.28
  -4  -1 -25   79.65    8.42
   4  -1 -25   74.02    5.85
  -4  -1  25   44.58    6.65
  -4   1  25   48.41    7.49
  -4  -1  25   68.51    7.48
   4  -1  25   67.11   13.38
  -4  -1  25   68.59    6.52
  -4   1  25   89.46   19.71
   4  -1  25   95.10   19.67
   4   1  25   88.55   21.13
  -4  -1 -26   -6.81    5.87
   4  -1 -26    1.58    1.27
  -4  -1  26    1.89    1.33
  -4  -1  26    1.70    0.99
   4  -1  26   -7.15    4.72
  -4  -1  26   -3.14    5.57
   4  -1  26   -0.40    3.24
   4   1  26    3.07    3.33
   4  -1 -27   29.78    7.09
  -4  -1  27   27.32    5.73
   4  -1  27   32.33    8.75
  -4  -1  27   19.64   12.50
  -4   1  27   42.03   11.74
   4  -1  27   32.70    9.67
   4   1  27   33.48    7.32
   4  -1 -28  386.95   20.16
  -4  -1  28  370.00   19.29
   4  -1  28  367.93   29.00
  -4  -1  28  328.72   18.88
  -4   1  28  357.19   20.31
   4  -1  28  396.13   30.93
   4   1  28  391.79   38.04
  -4  -1 -29  181.71   14.56
   4  -1 -29  164.77    9.34
  -4  -1  29  153.94    8.17
   4  -1  29  179.11   15.35
  -4  -1  29  166.23   26.49
  -4   1  29  161.93   16.88
   4  -1  29  201.23   24.40
   4   1  29  191.49   22.00
  -4  -1  30   25.01    6.02
   4  -1  30   37.30    8.24
  -4  -1  30   23.68    5.73
  -4   1  30   42.65   11.04
   4  -1  30   34.34   15.74
   4   1  30   35.26   12.63
  -4  -1 -31    6.67    5.88
   4  -1 -31    1.76    1.38
   4  -1  31   -1.04    4.64
  -4  -1  31    9.43    3.67
  -4   1  31    5.01    2.55
   4   1  31    4.41    6.78
  -4  -1 -32    5.43    3.52
   4  -1  32    8.22    3.13
  -4  -1  32   12.55    6.01
   4  -1  32    7.29    4.11
   4   1  32   -1.59    6.34
  -4  -1 -33   74.57   11.61
   4  -1  33   68.85   18.63
  -4  -1  33   73.10   23.39
  -4   1  33   78.97   26.48
   4  -1  33   78.48   19.91
   4   1  33   76.50   19.02
  -4  -1 -34   23.38    6.76
   4  -1  34   24.58    7.75
  -4  -1  34   23.85    6.04
  -4   1  34   27.55    7.55
   4  -1  34   33.01    8.20
   4   1  34   31.13    7.00
  -4  -1 -35    2.98    1.82
  -4   1  35   -0.10    6.08
   4  -1  35   -1.74    8.02
   4   1  35   12.32    7.19
  -4  -1 -36  121.75   22.86
   4  -1  36  106.71   30.65
  -4   1  36  112.20   33.67
   4  -1  36  127.58   29.76
   4   1  36  131.90   30.45
   4  -1  37   73.66   22.42
   4   1  37   70.75   27.04
  -4  -1  37   74.43   22.10
  -4   1  37   96.68   29.26
   4  -1  37   91.97   26.65
   4   1  37   86.82   23.52
   4  -1  38   52.66   19.88
   4   1  38   40.92   14.41
  -4  -1  38   63.09   22.90
  -4   1  38   71.16   18.29
   4  -1  38   67.43   26.78
   4   1  38   54.19   17.51
   4  -1  39    8.19    5.73
   4   1  39    3.28    4.18
  -4  -1  39   -7.16    6.32
  -4   1  39   -5.72    5.74
   4  -1  39    8.81    3.77
   4   1  39    3.46    3.92
   4  -1  40   40.44   15.60
   4   1  40   16.85   22.17
  -4  -1  40   43.18   12.55
  -4   1  40   39.06   14.85
   4  -1  40   55.76   18.58
   4   1  40   38.11   16.14
  -5  -1   0    2.64    1.30
   5   1   0   -1.67    2.27
   5  -1   0   -1.10    2.91
  -5   1   0   -2.15    2.82
  -5  -1   0   -0.35    2.73
   5   1   0    1.17    1.28
   5  -1   0    1.42    0.88
   5  -1   0    1.11    1.26
  -5  -1  -1  532.59   16.83
  -5  -1   1  572.36   16.56
   5   1  -1  415.68   12.95
   5  -1  -1  594.15   17.09
   5  -1   1  628.94   19.11
  -5   1   1  573.74   16.49
  -5   1  -1  584.12   16.90
  -5  -1  -1  674.91   19.49
  -5  -1   1  683.51   19.89
   5  -1   1  651.04   18.23
   5   1   1  644.97   19.09
   5   1  -1  655.83   18.32
   5  -1  -1  657.44   18.52
   5  -1   1  661.66   18.55
  -5  -1   2  286.13   16.40
   5  -1   2  299.00   14.52
  -5  -1  -2  282.42   64.39
   5   1   2  202.16   11.55
   5   1  -2  199.29   10.28
   5  -1  -2  300.34   16.33
   5  -1   2  324.62   17.50
  -5   1   2  305.10   16.26
  -5   1   2  332.81   17.08
   5  -1   2  326.24   17.02
   5   1   2  340.84   17.54
  -5  -1   2  319.08   18.18
   5   1  -2  326.20   16.46
   5  -1  -2  320.06   16.14
   5  -1   2  324.27   16.48
   5   1   2  333.77   17.06
   5  -1   3   56.18    5.07
  -5  -1  -3   50.90    5.35
   5   1  -3   43.59    3.13
   5   1   3   50.47   12.33
   5  -1  -3   59.52    6.41
  -5   1   3   65.04    6.11
   5  -1   3   57.77    5.07
   5   1   3   69.53    5.60
  -5   1   3   66.37    5.99
  -5  -1   3   77.58    8.08
   5   1  -3   61.16   14.45
   5  -1  -3   67.06    4.12
   5  -1   3   61.90    5.60
   5   1   3   76.32    5.18
   5  -1   4   -1.37    2.99
   5   1   4    3.86    2.05
   5   1  -4    4.43    1.52
   5  -1  -4    4.73    1.31
   5  -1   4    1.59    2.10
  -5   1   4    7.15    2.02
   5   1  -4    4.92    2.10
   5   1   4    1.87    1.98
  -5  -1   4    3.47    2.02
  -5   1   4    4.46    1.71
   5   1  -4    7.31    2.51
   5  -1  -4    2.37    1.25
   5  -1   4    2.38    1.47
   5   1   4    7.13    2.29
  -5   1  -4    1.52    1.30
   5  -1   5  229.65   12.53
  -5  -1  -5  200.69   11.73
   5   1  -5  188.74   11.07
   5   1   5  177.15   15.02
   5  -1  -5  260.06   13.54
  -5   1   5  237.03   12.30
   5  -1   5  254.51   14.21
   5   1  -5  250.60   13.75
   5   1   5  263.01   14.58
  -5  -1   5  278.37   16.26
  -5   1   5  274.92   15.74
   5   1  -5  273.43   14.32
   5  -1  -5  256.66   14.39
   5  -1   5  251.14   13.20
   5   1   5  285.18   15.00
  -5   1  -5  259.97   15.29
   5  -1   6  568.96   17.80
  -5  -1  -6  547.00   18.65
   5   1   6  479.68   14.57
   5   1  -6  515.73   14.96
   5  -1  -6  696.46   20.65
   5   1  -6  668.47   19.02
  -5   1   6  643.48   18.67
   5  -1   6  628.76   19.23
  -5  -1   6  719.29   23.92
  -5   1   6  732.47   21.25
   5   1  -6  732.13   21.12
   5  -1  -6  664.95   19.12
   5  -1   6  644.75   18.79
   5   1   6  727.62   21.55
  -5   1  -6  733.66   21.78
  -5  -1  -6  734.49   21.75
  -5  -1  -7  547.44   30.55
   5   1   7  464.21   15.13
   5   1  -7  534.55   15.39
   5  -1  -7  660.42   18.55
   5   1  -7  670.22   18.45
  -5   1   7  639.30   18.22
   5  -1   7  621.40   18.94
  -5  -1   7  747.79   22.76
  -5   1   7  686.29   20.53
   5   1  -7  702.69   21.61
   5  -1  -7  629.37   17.74
   5  -1   7  601.92   17.51
   5   1   7  705.75   20.67
  -5   1  -7  652.97   19.41
  -5  -1  -7  737.21   21.81
  -5  -1  -8  327.58   12.80
   5   1  -8  365.92   10.35
   5  -1  -8  449.24   17.97
   5   1  -8  432.02   12.00
  -5   1   8  424.30   12.49
   5  -1   8  393.98   13.40
  -5  -1   8  472.55   14.75
  -5   1   8  451.87   16.21
   5   1  -8  438.81   15.31
   5  -1  -8  391.40   12.11
   5  -1   8  398.82   13.88
   5   1   8  449.33   14.47
  -5   1  -8  442.30   14.33
  -5  -1  -8  455.39   14.17
   5  -1  -9   40.09    6.71
  -5   1   9   46.16    4.68
   5  -1   9   58.80   13.85
  -5  -1   9   58.11   17.86
  -5   1   9   49.94    8.96
   5   1  -9   38.44    9.87
   5  -1  -9   36.78    8.94
   5  -1   9   51.92    6.84
   5   1   9   48.49   11.63
  -5   1  -9   47.30    7.44
  -5  -1  -9   39.67   10.16
   5  -1 -10   37.26   10.51
  -5   1  10   23.47    4.45
   5  -1  10   32.19   10.86
  -5  -1  10   28.68    7.40
  -5   1  10   23.81    6.94
   5   1 -10   20.13    5.79
   5  -1 -10   17.27    2.68
   5  -1  10   29.66    7.68
   5   1  10   31.06    5.92
  -5   1 -10   23.32    4.74
  -5  -1 -10   18.38    4.97
  -5  -1 -11   17.48    5.02
   5  -1 -11   42.63    6.33
  -5   1  11   26.59    5.13
   5  -1  11   31.96    6.60
  -5  -1  11   33.23    7.87
  -5   1  11   27.99    8.40
   5   1 -11   21.06    4.02
   5  -1 -11   18.62    4.31
   5  -1  11   25.51    4.83
   5   1  11   29.63    8.20
  -5   1 -11   27.68    6.33
  -5  -1 -12   14.08    5.74
   5  -1 -12   18.97    4.69
  -5   1  12   17.67    3.42
  -5  -1  12   18.06    6.91
  -5   1  12   25.56    5.15
   5  -1 -12   10.52    3.06
   5  -1  12   20.22    5.03
   5   1  12   14.11    3.29
  -5   1 -12   15.78    4.30
  -5  -1 -13  107.92   13.46
   5  -1 -13  136.48    9.37
  -5   1  13  124.41    9.77
   5  -1  13  113.49   11.97
  -5  -1  13  133.28   14.14
  -5   1  13  130.43   12.30
   5  -1 -13  104.60    7.83
   5  -1  13   99.81   12.68
   5   1  13  140.84   10.66
  -5  -1 -14  316.85   28.03
   5  -1 -14  440.70   19.18
  -5   1  14  409.77   17.96
   5  -1  14  369.48   17.96
  -5  -1  14  405.66   21.08
  -5   1  14  410.20   20.63
   5  -1 -14  353.99   15.70
   5  -1  14  355.61   16.95
   5   1  14  470.81   26.09
  -5  -1 -15  272.76   15.02
   5  -1 -15  303.81   13.77
  -5   1  15  296.68   13.36
  -5  -1  15  326.70   16.18
  -5   1  15  290.91   13.96
   5   1  15  316.21   20.71
   5  -1 -16  867.60   29.73
  -5   1  16  886.72   29.78
   5  -1  16  763.69   28.08
  -5  -1  16  917.57   35.23
  -5   1  16  834.37   29.72
   5  -1  16  764.46   27.48
   5   1  16  858.74   31.24
  -5  -1 -17   10.25    4.96
   5  -1 -17    8.64    3.20
  -5   1  17    7.60    2.17
   5  -1  17   12.23    6.64
  -5  -1  17    8.59    4.96
  -5   1  17    3.69    2.16
   5   1  17   10.74    3.65
  -5  -1 -18   23.14    6.42
   5  -1 -18   18.21    3.75
  -5   1  18   12.02    3.15
   5  -1  18   18.42    7.77
  -5  -1  18   15.68    3.56
  -5   1  18   22.04    7.29
   5  -1  18   18.19    6.61
   5   1  18   25.47    5.65
  -5  -1 -19   97.30    8.11
   5  -1 -19   85.44    5.86
  -5   1  19  107.49    6.78
   5  -1  19   93.24   19.92
  -5  -1  19  102.01   21.11
  -5   1  19   91.88   16.01
   5  -1  19  109.15   10.84
   5   1  19   85.24    7.24
  -5  -1 -20    5.22    3.83
   5  -1 -20    9.48    2.75
  -5   1  20    5.33    1.65
   5  -1  20    8.53    3.44
  -5  -1  20   13.71    3.75
  -5   1  20   -0.42    4.29
   5  -1  20    1.12    2.10
   5   1  20    2.09    3.73
  -5  -1 -21  143.58   15.50
   5  -1 -21  126.42    8.62
  -5   1  21  116.89    3.96
   5  -1  21  134.79   16.18
  -5  -1  21  138.21    9.49
  -5   1  21  141.24   16.39
   5  -1  21  153.83   13.11
   5   1  21  148.12   16.46
  -5  -1 -22   82.72   21.16
   5  -1 -22   70.90    9.74
  -5   1  22   73.73   10.14
  -5  -1  22   74.13    3.51
   5  -1  22   95.67   11.57
  -5  -1  22   91.49   23.30
  -5   1  22   90.07   20.63
   5  -1  22  103.69   22.84
   5   1  22   94.47   18.17
   5  -1 -23   57.01    8.74
  -5   1  23   43.00    9.23
  -5  -1  23   55.25    3.74
   5  -1  23   67.77   15.52
  -5  -1  23   58.74   15.68
  -5   1  23   59.69    6.19
   5  -1  23   68.00   14.86
   5   1  23   72.25   18.37
   5  -1 -24  647.89   20.59
  -5  -1  24  555.90   17.91
  -5  -1  24  616.67   18.38
  -5  -1  24  663.29   26.60
   5   1  24  642.17   37.70
  -5  -1 -25  130.79   22.56
  -5  -1  25  112.63    7.37
  -5   1  25   86.82   10.74
  -5  -1  25   88.01    4.20
   5  -1  25  122.27   17.89
  -5  -1  25   96.50   22.15
  -5   1  25  103.93   23.76
   5  -1  25  118.38   10.35
   5   1  25  124.58    9.54
  -5  -1 -26   69.14   15.17
   5  -1 -26   58.77    9.31
  -5  -1  26   49.71    4.54
   5  -1  26   63.81   13.33
  -5  -1  26   71.45   18.31
  -5   1  26   65.94   13.74
   5  -1  26   65.90   14.01
   5   1  26   72.00   17.32
  -5  -1 -27   41.39    7.17
   5  -1 -27   23.89    6.86
  -5  -1  27   18.39    4.31
   5  -1  27   36.56    9.62
  -5  -1  27   25.19    9.80
  -5   1  27   35.61    7.08
   5  -1  27   35.94    6.90
   5   1  27   26.41   10.48
   5  -1 -28   46.29    9.58
   5  -1  28   59.06   13.64
  -5  -1  28   49.94   12.69
  -5   1  28   60.50   12.08
   5  -1  28   78.91   20.23
   5   1  28   69.71   18.53
  -5  -1 -29   31.80    9.06
   5  -1  29   18.36    6.15
  -5  -1  29   13.60    5.52
  -5   1  29   14.70    7.90
   5  -1  29   17.23    5.54
   5   1  29   19.87    8.43
   5  -1  30   84.69   20.23
  -5  -1  30   86.33   21.12
  -5   1  30   93.83   21.22
   5  -1  30  103.62   21.82
   5   1  30   94.43   21.65
  -5  -1 -31   17.12    5.51
   5  -1  31    5.38    5.18
  -5   1  31   14.68    7.03
   5  -1  31    7.30    4.21
   5   1  31    8.10    8.51
  -5  -1 -32  234.54   38.92
   5  -1  32  236.68   15.54
  -5  -1  32  217.77   20.04
  -5   1  32  214.30   21.68
   5  -1  32  234.42   35.00
   5   1  32  240.89   25.74
   5  -1  33   36.63   13.49
  -5  -1  33   40.25   13.03
  -5   1  33   38.66   10.33
   5  -1  33   40.10   12.75
   5   1  33   36.00    9.72
  -5  -1 -34   38.70   10.46
   5  -1  34   25.22    5.24
  -5  -1  34   30.94    6.92
  -5   1  34   36.84    9.88
   5  -1  34   27.88    9.96
   5   1  34   26.57    8.69
   5  -1  35   27.35   10.56
  -5  -1  35   12.23    5.26
  -5   1  35   25.21    8.16
   5  -1  35   19.38   10.84
   5   1  35   27.76   12.25
   5  -1  36   55.05   16.53
   5   1  36   52.15   20.84
  -5  -1  36   66.29   18.44
  -5   1  36   64.56   17.20
   5  -1  36   56.87   24.38
   5   1  36   68.65   20.89
   5  -1  37   15.29    5.50
   5   1  37   26.65    9.64
  -5  -1  37    9.91    3.34
  -5   1  37    9.58    4.43
   5  -1  37   37.21   10.53
   5   1  37   20.20   10.90
   5  -1  38   62.93   19.40
   5   1  38  103.86   14.88
  -5  -1  38   78.50    7.24
  -5   1  38   67.60   20.17
   5  -1  38   90.89   13.60
   5   1  38   75.32   28.37
   5  -1  39   14.62    6.40
   5   1  39    5.93    5.25
  -5  -1  39   -2.13    6.55
  -5   1  39    9.95    4.60
   5  -1  39    5.91    3.34
   5   1  39   16.49   10.05
   5  -1  40   38.62   14.51
   5   1  40   25.06   15.16
  -5  -1  40   34.65   13.75
  -5   1  40   38.07   13.46
   5  -1  40   23.04   14.81
   5   1  40   30.88   10.32
  -6  -1   0   15.38    4.14
   6  -1   0   10.85    2.99
   6   1   0    7.77    2.54
   6  -1   0   20.68    5.49
  -6  -1   0   17.08    4.98
   6   1   0   16.26    4.73
   6  -1   0   14.22    2.95
   6  -1   0   19.85    4.29
  -6  -1   1   26.23    5.81
   6  -1   1   20.08    3.82
  -6  -1  -1   24.91    6.50
   6   1   1    8.66    4.07
   6   1  -1    9.73    5.07
   6  -1  -1   24.73    4.67
   6  -1   1   26.94    5.22
  -6  -1  -1   25.74    8.87
  -6  -1   1   25.20    6.73
   6  -1   1   26.30    6.21
   6   1   1   21.69    5.07
   6   1  -1   21.92    5.18
   6  -1  -1   22.61    3.52
   6  -1   1   26.89    5.42
   6  -1  -1   30.83    5.40
   6  -1   2  959.85   26.93
  -6  -1  -2  947.30   31.80
   6  -1  -2 1101.84   31.16
   6  -1   2 1075.83   30.25
  -6   1   2 1000.96   27.97
   6   1  -2 1018.72   28.82
  -6   1   2 1190.75   32.43
   6  -1   2 1143.39   31.87
  -6  -1   2 1188.57   34.20
   6   1   2 1159.25   32.67
   6   1  -2 1148.37   31.93
   6  -1  -2 1145.95   31.05
   6  -1   2 1138.95   32.12
   6   1   2 1179.83   32.86
   6  -1   3  216.36   11.74
  -6  -1  -3  202.18   11.74
   6   1  -3  167.50    9.46
   6   1   3  151.06   11.24
   6  -1  -3  243.07   13.42
   6  -1   3  254.08   14.03
   6   1  -3  249.88   13.06
  -6   1   3  219.88   14.11
   6  -1   3  267.16   14.39
  -6   1   3  269.83   13.99
   6   1   3  264.82   13.63
  -6  -1   3  285.58   18.58
   6   1  -3  268.83   13.96
   6  -1  -3  251.53   12.94
   6  -1   3  250.98   12.77
   6   1   3  282.48   15.06
  -6  -1  -4  137.24    9.38
   6   1  -4  104.59    7.53
   6   1   4   96.25   24.46
   6  -1  -4  178.07   14.16
   6  -1   4  186.24   14.45
  -6   1   4  164.86   10.89
   6   1  -4  153.64    9.97
   6  -1   4  175.76    9.64
   6   1   4  170.93    9.69
  -6  -1   4  171.58   10.60
  -6   1   4  172.94    9.20
   6   1  -4  174.05    9.74
   6  -1  -4  164.80    9.31
   6  -1   4  159.97    8.81
   6   1   4  184.71   10.77
  -6  -1  -5   58.42    7.64
   6   1  -5   40.87    7.34
   6  -1  -5   61.32    6.03
   6   1  -5   63.20    4.16
   6  -1   5   70.41    6.11
  -6   1   5   55.61    6.58
   6   1   5   62.72    6.67
  -6  -1   5   71.81    4.89
  -6   1   5   63.62    4.72
   6   1  -5   68.72    8.28
   6  -1  -5   67.19    3.01
   6  -1   5   63.41    4.61
   6   1   5   62.75    6.33
  -6   1  -5   65.06    7.99
  -6  -1  -6 1009.57   34.54
   6   1  -6  931.56   26.19
   6  -1  -6 1296.00   36.92
   6   1  -6 1234.81   34.34
  -6   1   6 1131.82   32.70
   6  -1   6 1214.87   35.34
   6   1   6 1312.15   36.46
  -6  -1   6 1358.04   39.95
  -6   1   6 1333.10   37.04
   6   1  -6 1320.00   37.09
   6  -1  -6 1231.05   34.72
   6  -1   6 1210.59   33.51
   6   1   6 1328.20   37.21
  -6   1  -6 1326.05   36.82
  -6  -1  -7   21.93    6.65
   6   1  -7   13.61    2.70
   6  -1  -7   30.48    6.11
   6   1  -7   17.22    3.72
  -6   1   7   16.51    5.29
   6  -1   7   18.63    5.73
   6   1   7   21.21    3.63
  -6  -1   7   20.60    5.71
  -6   1   7   16.00    3.25
   6   1  -7   11.94    3.53
   6  -1  -7   12.93    2.69
   6  -1   7   17.54    5.00
   6   1   7   21.76    6.98
  -6   1  -7   18.57    3.88
  -6  -1  -8   43.54   12.05
   6   1  -8   37.42    4.60
   6  -1  -8   59.57   17.34
   6   1  -8   49.78    5.47
  -6   1   8   55.55    6.30
   6  -1   8   59.24   14.25
  -6  -1   8   52.35    8.24
  -6   1   8   47.15    8.05
   6   1  -8   43.28    9.83
   6  -1  -8   44.40    6.02
   6  -1   8   51.29   10.71
   6   1   8   64.70   13.62
  -6   1  -8   58.00    6.03
  -6  -1  -8   44.86   11.57
  -6  -1  -9  155.22   17.00
   6   1  -9  170.71   10.53
   6  -1  -9  200.87   16.19
   6   1  -9  196.05   12.36
  -6   1   9  192.67   12.93
   6  -1   9  190.82   14.95
  -6  -1   9  221.21   16.03
  -6   1   9  222.08   16.38
   6   1  -9  207.48   13.25
   6  -1  -9  194.11   12.40
   6  -1   9  190.84   15.52
   6   1   9  232.12   16.02
  -6   1  -9  217.76   14.59
  -6  -1 -10  220.70   18.14
   6   1 -10  314.82   19.00
   6  -1 -10  336.36   20.82
   6   1 -10  319.49   19.42
  -6   1  10  319.86   19.69
   6  -1  10  288.19   19.24
  -6  -1  10  346.94   23.44
  -6   1  10  341.26   22.23
   6   1 -10  347.29   21.52
   6  -1 -10  285.28   17.75
   6  -1  10  305.10   19.18
   6   1  10  361.29   22.97
  -6   1 -10  344.76   21.70
  -6  -1 -11  115.80   48.53
   6  -1 -11  189.92   10.54
  -6   1  11  176.22    8.95
   6  -1  11  161.36   35.95
  -6  -1  11  191.62    9.71
  -6   1  11  201.18   10.33
   6  -1 -11  153.71    7.13
   6  -1  11  159.13    9.06
   6   1  11  199.04   15.00
  -6   1 -11  185.64   38.39
   6  -1 -12 1017.98   34.68
  -6   1  12  991.95   33.31
   6  -1  12  969.40   33.91
  -6  -1  12 1149.30   40.32
  -6   1  12 1083.75   36.99
   6  -1 -12  894.86   31.02
   6  -1  12  875.24   31.47
   6   1  12 1054.19   36.33
  -6  -1 -13    9.21    9.69
   6  -1 -13   21.88    4.33
  -6   1  13   21.57    3.40
   6  -1  13   27.99    6.57
  -6  -1  13   36.00    7.86
  -6   1  13   27.50    6.79
   6  -1 -13   18.63    4.48
   6  -1  13   31.12    6.21
   6   1  13   33.09    8.07
  -6  -1 -14   50.67   15.42
   6  -1 -14   66.39    6.60
  -6   1  14   62.08    6.33
   6  -1  14   67.54   13.97
  -6  -1  14   80.50   16.60
  -6   1  14   77.87   12.21
   6  -1  14   61.91    5.37
   6   1  14   70.72    7.98
  -6  -1 -15   28.19    6.97
   6  -1 -15   24.01    3.69
  -6   1  15   21.01    3.80
   6  -1  15   17.39    4.48
  -6  -1  15   30.01    6.42
  -6   1  15   26.42    6.19
   6  -1  15   20.39    4.18
   6   1  15   33.40   10.75
  -6  -1 -16    9.39    4.86
   6  -1 -16   15.29    2.54
  -6   1  16    7.13    2.25
   6  -1  16   11.66    5.86
  -6  -1  16   14.04    4.93
  -6   1  16   10.92    4.35
   6  -1  16   17.98    4.30
   6   1  16   19.63    3.89
  -6  -1 -17  133.78   11.65
   6  -1 -17  155.21    9.15
  -6   1  17  145.13    8.85
   6  -1  17  140.42   10.86
  -6  -1  17  146.30   13.26
  -6   1  17  158.19   10.72
   6  -1  17  124.92    9.26
   6   1  17  161.71   13.06
   6  -1 -18  139.24    9.62
  -6   1  18  136.50    3.68
   6  -1  18  122.31    8.45
  -6  -1  18  150.39    8.26
  -6   1  18  134.49    8.08
   6  -1  18  117.12    8.50
   6   1  18  131.78    9.99
  -6  -1 -19   79.27   10.08
   6  -1 -19   46.78    6.60
  -6   1  19   42.71    7.69
   6  -1  19   23.33   10.35
  -6  -1  19   65.94   18.00
  -6   1  19   61.24   16.40
   6  -1  19   59.59   14.45
   6   1  19   56.33   17.17
   6  -1 -20  837.91   31.99
  -6   1  20  911.13   34.23
   6  -1  20  840.23   33.82
  -6  -1  20  975.10   38.10
  -6   1  20  901.73   41.63
   6  -1  20  842.76   33.31
   6   1  20  939.50   49.87
  -6  -1 -21    8.20    5.70
   6  -1 -21   11.20    3.41
  -6   1  21   11.56    2.28
  -6  -1  21    7.67    4.11
  -6   1  21    4.87    3.50
   6  -1  21    5.80    3.65
   6   1  21   15.23    6.38
  -6  -1 -22   14.47    4.75
   6  -1 -22    9.06    2.92
  -6   1  22    9.13    3.33
   6  -1  22    9.33    6.52
  -6  -1  22   11.91    5.40
  -6   1  22   14.14    3.67
   6  -1  22   16.29    4.30
   6   1  22   15.23    6.40
  -6  -1 -23  100.62   20.59
   6  -1 -23   86.85    5.71
  -6   1  23   97.48   11.37
   6  -1  23   92.53   24.71
  -6  -1  23  102.95   23.86
  -6   1  23   86.45   24.34
   6  -1  23   89.52   10.16
   6   1  23   95.34   26.08
  -6  -1 -24   12.17    6.83
   6  -1 -24    3.20    2.23
   6  -1  24   -3.33    5.52
  -6  -1  24   -0.43    4.54
  -6   1  24   -0.73    4.22
   6  -1  24    6.77    4.78
   6   1  24    3.91    3.67
  -6  -1 -25   16.15    6.19
   6  -1 -25   12.35    5.27
   6  -1  25   25.27   11.03
  -6  -1  25    6.61    4.59
  -6   1  25   10.75    5.29
   6  -1  25   17.31    6.98
   6   1  25   24.34    9.73
  -6  -1 -26   -0.09    5.95
   6  -1 -26    0.69    1.25
   6  -1  26   -8.54    5.44
  -6  -1  26    3.65    2.92
  -6   1  26    2.80    2.22
   6  -1  26    7.41    3.96
   6   1  26   -3.57    5.52
  -6  -1 -27    7.09    4.96
   6  -1  27   14.74    6.24
  -6  -1  27   10.83    7.78
  -6   1  27    9.28    6.42
   6  -1  27    6.93    3.95
   6   1  27    9.40    6.29
  -6  -1 -28  448.37   40.63
   6  -1  28  481.67   27.61
  -6  -1  28  417.64   25.62
  -6   1  28  386.86   25.69
   6  -1  28  490.57   43.24
   6   1  28  463.63   39.83
  -6  -1 -29    4.92    4.17
   6  -1  29   15.57    4.11
  -6  -1  29   18.38    5.45
  -6   1  29    6.02    2.66
   6  -1  29   14.24    6.15
   6   1  29   21.13    6.40
  -6  -1 -30   39.85   11.05
   6  -1  30   33.69    9.41
  -6  -1  30   32.13   10.07
  -6   1  30   29.81    6.71
   6  -1  30   33.27    9.02
   6   1  30   46.10   12.91
   6  -1  31   62.96   20.27
  -6  -1  31   55.78   12.98
  -6   1  31   50.64   12.69
   6  -1  31   48.64   11.19
   6   1  31   54.51   13.12
  -6  -1 -32   56.97   11.86
   6  -1  32   42.76   10.76
  -6  -1  32   41.26   10.14
  -6   1  32   33.98    7.82
   6  -1  32   37.93    7.58
   6   1  32   51.05   13.74
  -6  -1 -33   19.34    4.65
   6  -1  33    8.68    4.27
  -6  -1  33    5.53    3.29
  -6   1  33    7.71    2.97
   6  -1  33   12.61    4.28
   6   1  33   13.01    6.40
   6  -1  34   62.57   20.03
   6   1  34   59.09   20.18
  -6  -1  34   65.74   16.03
  -6   1  34   58.65   16.45
   6  -1  34   58.76   21.11
   6   1  34   77.35   27.32
   6  -1  35    1.90    3.36
   6   1  35   -7.09    6.33
  -6  -1  35    8.00    4.90
  -6   1  35    0.86    4.22
   6  -1  35  -11.08    7.71
   6   1  35    5.48    6.26
   6  -1  36  238.34   15.76
   6   1  36  200.95   20.91
  -6  -1  36  174.37   17.48
  -6   1  36  182.95   25.65
   6  -1  36  201.68   22.05
   6   1  36  185.05   20.89
   6  -1  37   24.34    7.51
   6   1  37   25.06    7.93
  -6  -1  37   26.27    7.75
  -6   1  37   27.76   10.28
   6  -1  37   36.78   14.35
   6   1  37   36.00   11.03
   6  -1  38   20.90    9.40
   6   1  38   35.56   12.29
  -6  -1  38   26.82    8.48
  -6   1  38   30.90   13.29
   6  -1  38   18.27    6.25
   6   1  38   24.27    7.89
   6  -1  39   32.73    9.98
   6   1  39   33.52   12.06
  -6  -1  39   13.38    8.45
  -6   1  39   20.72   12.39
   6  -1  39   26.12    8.06
   6   1  39   20.12    6.61
   7  -1   0   -0.11    2.17
   7   1   0    0.97    1.69
   7  -1   0   -0.39    3.24
   7   1   0    1.87    1.88
  -7  -1   0    1.62    2.21
   7   1   0    0.77    1.38
   7  -1   0    1.23    1.77
   7  -1  -1   37.58    3.74
   7   1  -1   32.70    8.16
   7   1   1   29.72    7.47
   7  -1  -1   64.34    5.59
   7  -1   1   51.38   10.26
   7   1  -1   51.40    5.36
  -7  -1   1   66.13    5.04
   7   1   1   51.73    6.53
   7  -1   1   57.53    6.29
   7   1  -1   52.71    7.35
   7  -1  -1   57.92    5.05
   7  -1   1   59.39    4.40
   7  -1  -1   62.78    8.96
   7   1   1   59.69   12.02
  -7  -1  -2 1161.88   33.29
   7  -1  -2 1095.15   31.50
   7  -1  -2 1273.14   36.05
   7  -1   2 1235.40   34.84
   7   1  -2 1207.60   34.43
  -7   1   2 1338.18   36.56
  -7  -1   2 1389.03   39.74
   7   1   2 1332.00   37.79
   7  -1   2 1311.70   35.88
   7   1  -2 1321.56   37.74
   7  -1  -2 1308.51   35.91
   7  -1   2 1314.85   36.50
   7   1   2 1395.61   39.04
   7  -1  -3   96.67    8.07
  -7  -1  -3  103.33    8.46
   7  -1  -3  106.58    8.48
   7  -1   3  109.00    8.30
   7   1  -3  102.76    9.77
  -7   1   3  114.88    8.44
  -7  -1   3  120.31   14.58
   7  -1   3  105.79    5.23
   7   1   3  103.94    4.22
   7   1  -3  105.83    8.25
   7  -1  -3   99.31    6.08
   7  -1   3  114.05    8.18
   7   1   3  131.23   14.06
  -7  -1  -4   22.72    7.32
   7   1  -4   14.27    2.98
   7  -1  -4   30.48    8.11
   7  -1   4   31.40    7.75
   7   1  -4   33.83    6.37
   7  -1   4   24.08    4.66
  -7   1   4   33.88    5.72
   7   1   4   23.85    7.74
  -7  -1   4   26.20    7.32
   7   1  -4   24.75    6.87
   7  -1  -4   24.47    5.48
   7  -1   4   30.24    6.84
   7   1   4   27.01    6.40
  -7  -1  -5  218.55   19.61
   7   1  -5  188.35   12.16
   7  -1  -5  304.51   19.60
   7   1  -5  289.77   18.21
   7  -1   5  282.12   21.89
  -7   1   5  270.27   16.86
   7  -1   5  293.76   19.04
   7   1   5  309.46   19.56
  -7   1   5  315.63   20.42
  -7  -1   5  301.18   20.50
   7   1  -5  293.68   20.14
   7  -1  -5  287.92   18.47
   7  -1   5  287.24   18.33
   7   1   5  319.74   20.23
  -7  -1  -6  783.53   23.33
   7   1  -6  679.72   19.78
   7  -1  -6  961.04   28.02
   7   1  -6  939.59   27.15
   7  -1   6  866.25   25.73
  -7   1   6  853.04   25.07
   7   1   6  940.86   27.84
  -7  -1   6 1006.00   32.55
  -7   1   6 1008.02   28.50
   7   1  -6  972.49   27.89
   7  -1  -6  946.11   27.01
   7  -1   6  921.90   26.50
   7   1   6 1007.10   32.65
  -7  -1  -7   16.32    9.38
   7   1  -7   20.46    4.75
   7  -1  -7   27.40    5.57
   7   1  -7   29.74    5.54
   7  -1   7   43.70    8.27
  -7   1   7   21.46    4.23
  -7  -1   7   33.92    7.73
  -7   1   7   28.46    4.46
   7   1  -7   21.02    6.66
   7  -1  -7   24.37    4.95
   7  -1   7   25.73    5.00
   7   1   7   36.84   11.21
  -7   1  -7   30.06    3.70
  -7  -1  -8  502.36   18.84
   7   1  -8  468.01   16.53
   7  -1  -8  614.02   22.58
   7   1  -8  602.93   21.10
   7  -1   8  553.52   22.05
  -7   1   8  530.26   18.31
  -7  -1   8  650.17   22.89
  -7   1   8  640.73   22.92
   7   1  -8  627.30   22.29
   7  -1  -8  547.02  112.44
   7  -1   8  557.63   19.89
   7   1   8  661.58   23.52
  -7   1  -8  630.16   22.05
  -7  -1  -9    3.72    2.71
   7   1  -9    8.22    2.59
   7  -1  -9   14.71    2.97
   7   1  -9   10.62    2.39
   7  -1   9    7.03    4.29
  -7   1   9    7.78    1.75
  -7  -1   9   14.37    5.19
  -7   1   9   16.41    4.05
   7   1  -9    8.98    2.27
   7  -1  -9   11.03    3.81
   7  -1   9    9.25    3.25
   7   1   9   10.93    4.00
  -7   1  -9    8.23    1.94
  -7  -1 -10  239.54   12.59
   7   1 -10  249.97   10.67
   7  -1 -10  316.87   14.47
   7   1 -10  291.67   12.66
  -7   1  10  258.36   12.01
   7  -1  10  282.40   15.75
  -7  -1  10  343.20   17.65
  -7   1  10  310.41   15.40
   7  -1 -10  263.59   11.96
   7  -1  10  276.29   14.27
   7   1  10  298.50   14.65
  -7   1 -10  299.65   21.98
  -7  -1 -11   14.04    6.26
   7   1 -11   21.98    2.71
   7  -1 -11   31.35    6.63
   7   1 -11   23.26    3.67
  -7   1  11   23.11    5.28
   7  -1  11   27.34    6.25
  -7  -1  11   32.59    6.89
  -7   1  11   27.98    5.74
   7  -1 -11   20.41    4.14
   7  -1  11   32.04    7.46
   7   1  11   40.13    7.43
  -7   1 -11   24.98    5.89
  -7  -1 -12    4.27    3.22
   7  -1 -12   19.72    3.55
  -7   1  12   14.61    3.21
   7  -1  12   10.05    3.74
  -7  -1  12   28.48    5.85
  -7   1  12   28.81    6.16
   7  -1 -12   15.34    3.63
   7  -1  12   20.08    5.64
   7   1  12   17.10    4.99
  -7  -1 -13  256.10   19.22
   7  -1 -13  340.45   18.34
  -7   1  13  297.60   15.90
   7  -1  13  275.17   16.75
  -7  -1  13  358.11   20.02
  -7   1  13  351.33   20.39
   7  -1 -13  286.58   16.07
   7  -1  13  306.31   23.69
   7   1  13  348.60   21.08
  -7  -1 -14  156.63   14.66
   7  -1 -14  208.12   12.16
  -7   1  14  180.57   10.66
   7  -1  14  180.94   13.23
  -7  -1  14  215.09   23.18
  -7   1  14  208.54   16.39
   7  -1  14  178.67   12.80
   7   1  14  231.89   20.98
  -7  -1 -15    2.01    5.37
   7  -1 -15   22.23    3.21
  -7   1  15   14.22    2.76
   7  -1  15   21.51    8.65
  -7  -1  15   27.00   12.91
  -7   1  15   21.85    6.01
   7  -1  15   19.32    4.45
   7   1  15   24.88    7.10
  -7  -1 -16  637.66   26.73
   7  -1 -16  788.45   30.70
  -7   1  16  713.98   27.34
  -7  -1  16  841.73   34.05
  -7   1  16  806.03   32.49
   7  -1  16  652.80   27.32
   7   1  16  777.37   37.75
  -7  -1 -17   41.65   24.48
   7  -1 -17   62.62    7.27
  -7   1  17   45.66    5.54
   7  -1  17   52.96   11.34
  -7  -1  17   64.52   14.01
  -7   1  17   60.79   13.72
   7  -1  17   52.15   10.10
   7   1  17   55.68   13.30
  -7  -1 -18   68.62   17.93
   7  -1 -18   81.90    3.48
  -7   1  18   78.90    6.06
   7  -1  18   90.75   21.49
  -7  -1  18  105.02   15.26
  -7   1  18   93.79   20.60
   7  -1  18   81.32    8.05
   7   1  18   96.33   17.27
  -7  -1 -19   74.30   19.67
   7  -1 -19   62.51    5.52
  -7   1  19   56.81    4.86
   7  -1  19   68.00   14.20
  -7  -1  19   71.27   16.12
  -7   1  19   62.69   16.22
   7  -1  19   57.07   14.44
   7   1  19   71.74   18.20
  -7  -1 -20    7.43    3.25
   7  -1 -20    8.90    2.75
  -7   1  20    7.29    1.68
   7  -1  20   13.08    5.09
  -7  -1  20   18.11    5.45
  -7   1  20    8.19    3.73
   7  -1  20    9.97    5.97
   7   1  20   14.27    3.57
  -7  -1 -21   24.97    6.21
   7  -1 -21   18.17    4.30
  -7   1  21   16.13    3.49
   7  -1  21   23.68    5.26
  -7  -1  21   25.81    5.61
  -7   1  21   23.05    7.80
   7  -1  21   26.31    6.95
   7   1  21   35.16   12.52
  -7  -1 -22   18.32    7.28
   7  -1 -22   15.67    5.79
  -7   1  22   12.93    4.78
   7  -1  22   16.78    9.05
  -7  -1  22   30.64    7.53
  -7   1  22   24.18    9.33
   7  -1  22   18.10    7.82
   7   1  22   27.35    8.02
  -7  -1 -23   25.45    7.15
   7  -1 -23   11.71    5.02
   7  -1  23   11.50    5.49
  -7  -1  23    9.78    6.37
  -7   1  23   23.94   13.97
   7  -1  23   20.43    8.51
   7   1  23   14.84    5.27
  -7  -1 -24  675.00   38.03
   7  -1  24  679.56   36.17
  -7  -1  24  701.38   39.26
  -7   1  24  663.22   37.03
   7  -1  24  705.39   38.39
   7   1  24  711.95   53.71
  -7  -1 -25   17.94    8.57
   7  -1  25   11.85    3.41
  -7  -1  25    8.58    3.51
  -7   1  25    7.06    3.50
   7  -1  25    6.96    4.22
   7   1  25    5.83    5.02
  -7  -1 -26   10.40    5.55
   7  -1  26   11.42    4.91
  -7  -1  26   16.08    4.54
  -7   1  26   19.71    5.80
   7  -1  26    7.71    2.29
   7   1  26   11.25    3.34
  -7  -1 -27   70.13   12.78
   7  -1  27   70.26   17.70
  -7  -1  27   64.20   16.73
  -7   1  27   56.60   11.89
   7  -1  27   47.96   15.78
   7   1  27   48.72   12.38
  -7  -1 -28   25.70   10.22
   7  -1  28   13.55    4.81
  -7  -1  28   14.22    5.59
  -7   1  28   16.46    4.96
   7  -1  28   20.24    6.89
   7   1  28   17.76    5.77
  -7  -1 -29   36.53    5.03
   7  -1  29   27.11    6.54
  -7  -1  29   36.97   11.03
  -7   1  29   23.89    6.75
   7  -1  29   39.91    7.99
   7   1  29   31.08   13.22
  -7  -1 -30   83.77   23.23
   7  -1  30   98.00   27.56
  -7  -1  30   69.42   22.23
  -7   1  30   88.64   24.91
   7  -1  30   89.83   14.43
   7   1  30   89.53   26.73
   7  -1  31    7.33    4.40
  -7  -1  31   12.58    4.76
   7  -1  31   19.72    6.92
   7   1  31   10.36    5.36
   7  -1  32  292.65   37.40
   7   1  32  312.32   17.09
  -7  -1  32  250.51   13.67
   7  -1  32  286.79   24.08
   7   1  32  310.72   33.00
   7  -1  33   15.05    8.15
  -7  -1  33   -0.18    3.52
  -7   1  33    6.66    6.57
   7  -1  33    0.99    4.30
   7   1  33   14.23    7.17
   7   1  34   37.39   14.31
  -7  -1  34   24.51    8.65
  -7   1  34   31.73   13.37
   7  -1  34   36.97   12.19
   7   1  34   40.92   15.78
   7  -1  35   71.57   15.62
   7   1  35   65.13   28.29
  -7  -1  35   62.50   19.39
  -7   1  35   57.45   15.85
   7  -1  35   64.96   24.36
   7   1  35   65.10   12.00
   7  -1  36   25.81    8.33
   7   1  36   32.75   13.29
  -7  -1  36   30.85   11.13
  -7   1  36   37.83   10.34
   7  -1  36   30.64    9.07
   7   1  36   39.90   14.54
   7  -1  37    6.03    4.45
   7   1  37    8.78    7.17
  -7  -1  37    1.69    5.98
  -7   1  37    8.49    3.45
   7  -1  37    7.87    3.61
   7   1  37   -0.36    6.55
   7  -1  38   76.70   30.07
   7   1  38   86.25   18.48
  -7  -1  38   90.84   30.55
  -7   1  38   59.78   23.68
   7  -1  38  101.75   16.79
   7   1  38   92.51   28.26
   8  -1   0   43.16    7.86
   8   1   0   38.20    8.17
   8   1   0   29.18    8.55
   8  -1   0   32.24    6.51
   8  -1   0   29.02    5.73
   8  -1  -1  722.14   27.29
   8  -1   1  627.37   23.27
   8   1  -1  658.58   25.21
   8   1   1  650.17   23.60
  -8  -1   1  729.82   26.73
   8   1   1  705.44   25.37
   8  -1   1  690.22   23.90
   8   1  -1  699.32   25.05
   8  -1  -1  702.60   25.11
   8  -1   1  716.76   25.37
   8  -1  -1  715.27   24.82
   8   1   1  736.69   26.11
   8  -1  -2  941.34   32.28
   8  -1   2  926.42   32.30
   8   1  -2  904.08   35.71
   8   1   2  841.93   31.01
  -8  -1   2 1027.68   36.57
   8   1   2  949.13   34.64
   8  -1   2  957.92   32.90
   8   1  -2  976.71   33.98
   8  -1  -2  973.05   32.50
   8  -1   2  954.43   33.55
   8   1   2 1006.47   35.00
   8  -1  -2  990.03   33.37
   8  -1  -3   51.78    7.94
   8   1  -3   39.40    8.96
   8  -1  -3   78.33   14.61
   8  -1   3   82.52    7.86
   8   1   3   67.34   12.71
  -8   1   3   85.64    7.22
  -8  -1   3   84.39   14.55
   8  -1   3   76.14    7.07
   8   1   3   76.21    7.61
   8   1  -3   64.68    8.16
   8  -1  -3   84.31    7.39
   8  -1   3   83.35    7.26
   8   1   3   92.10   12.51
   8  -1  -4   55.64    7.80
   8   1  -4   42.33    6.80
   8  -1  -4   67.49    7.07
   8   1  -4   75.77   10.39
   8  -1   4   68.73   13.97
  -8   1   4   68.56    5.35
   8  -1   4   68.79    8.00
  -8  -1   4   75.54   11.05
   8   1   4   62.69    8.38
   8   1  -4   66.82   10.72
   8  -1  -4   64.09    3.16
   8  -1   4   67.08    6.03
   8   1   4   83.78   10.30
  -8  -1  -5   44.68   12.81
   8  -1  -5   36.54    9.19
   8   1  -5   27.18    6.26
   8  -1  -5   45.98    4.49
   8   1  -5   57.63    7.44
   8  -1   5   45.58   14.32
   8  -1   5   46.78    5.97
  -8   1   5   48.03    5.89
  -8  -1   5   58.35   13.29
   8   1  -5   43.25    7.49
   8  -1  -5   40.65    6.54
   8  -1   5   46.21    7.06
   8   1   5   50.78   10.27
   8  -1  -6  492.81   21.19
  -8  -1  -6  497.31   19.78
   8   1  -6  413.23   18.33
   8  -1  -6  556.67   24.53
   8   1  -6  571.18   20.51
   8  -1   6  540.16   23.06
   8  -1   6  601.47   23.04
  -8   1   6  627.70   21.75
  -8  -1   6  618.23   23.76
   8   1  -6  606.40   21.55
   8  -1  -6  589.44   20.25
   8  -1   6  568.71   21.72
   8   1   6  624.73   25.27
  -8  -1  -7    6.78    2.71
   8  -1  -7    0.30    1.23
   8   1  -7    2.48    1.87
   8  -1  -7    2.86    1.78
   8   1  -7    4.71    2.55
   8  -1   7    1.43    3.71
   8  -1   7   -0.72    1.65
  -8  -1   7    4.35    2.07
  -8   1   7    3.87    2.83
   8  -1  -7    1.92    1.83
   8  -1   7    2.52    1.99
   8   1   7    5.02    3.74
  -8  -1  -8    7.67    4.40
   8   1  -8   13.39    4.10
   8  -1  -8   20.75    3.62
   8   1  -8   20.62    5.08
   8  -1   8   17.08    5.64
  -8  -1   8   22.01    4.11
  -8   1   8   20.74    4.16
   8  -1  -8   16.49    5.71
   8  -1   8   18.24    4.96
   8   1   8   26.16    6.95
  -8   1  -8   16.34    4.21
  -8  -1  -9  124.97    9.37
   8   1  -9  116.09    7.08
   8  -1  -9  152.22   13.08
   8   1  -9  146.95    8.73
   8  -1   9  131.39   12.21
  -8  -1   9  168.03   13.74
  -8   1   9  163.83   11.82
   8  -1  -9  131.20    8.08
   8  -1   9  135.71   13.40
   8   1   9  139.36    9.45
  -8   1  -9  143.93    9.88
  -8  -1 -10  370.10   22.53
   8   1 -10  381.33   11.63
   8  -1 -10  477.03   15.31
   8   1 -10  464.84   14.54
   8  -1  10  438.16   15.68
  -8  -1  10  544.08   19.60
  -8   1  10  501.72   15.74
   8  -1 -10  441.10   14.04
   8  -1  10  449.71   15.58
   8   1  10  484.28   15.69
  -8  -1 -11    4.41    3.30
   8   1 -11   12.86    2.99
   8  -1 -11   19.03    3.63
   8   1 -11   17.22    3.43
   8  -1  11    9.71    5.22
  -8   1  11    6.73    2.42
  -8  -1  11   15.73    5.74
  -8   1  11   14.15    5.97
   8  -1 -11   17.08    3.94
   8  -1  11   21.44    4.03
   8   1  11   22.39    6.54
  -8  -1 -12  295.79   18.06
   8   1 -12  379.34   14.49
   8  -1 -12  421.35   17.90
   8   1 -12  398.52   15.29
   8  -1  12  367.46   26.97
  -8   1  12  328.58   13.06
  -8  -1  12  423.95   17.98
  -8   1  12  438.02   18.68
   8  -1 -12  347.37   11.18
   8  -1  12  349.18   19.21
   8   1  12  428.16   18.52
  -8  -1 -13   30.79   11.64
   8  -1 -13   37.31    5.80
   8  -1  13   36.98    7.65
  -8   1  13   24.08    4.48
  -8  -1  13   40.46    9.78
  -8   1  13   47.62   10.52
   8  -1 -13   19.05    5.66
   8  -1  13   35.90   11.16
   8   1  13   48.10    9.12
  -8  -1 -14  191.19   22.08
   8  -1 -14  232.09   15.26
   8  -1  14  201.88   14.60
  -8   1  14  185.61   11.44
  -8  -1  14  243.46   25.24
  -8   1  14  265.54   17.34
   8  -1  14  215.29   16.92
   8   1  14  232.20   21.70
  -8  -1 -15   33.67   10.86
   8  -1 -15   36.51    6.05
  -8   1  15   24.88    5.02
   8  -1  15   42.04    8.64
  -8  -1  15   40.14   10.47
  -8   1  15   37.42    7.21
   8  -1  15   23.88    5.94
   8   1  15   38.53   10.32
  -8  -1 -16   89.63   28.27
   8  -1 -16   83.51    7.88
   8  -1  16   69.20   17.57
  -8   1  16   62.95    6.09
  -8  -1  16   92.67   15.31
  -8   1  16   95.11    9.52
   8  -1  16   71.76   14.43
   8   1  16   89.36   16.84
  -8  -1 -17  106.31   27.61
   8  -1 -17   99.37   11.18
   8  -1  17   99.92    9.84
  -8   1  17   83.18    4.55
  -8  -1  17  116.66   16.73
  -8   1  17  116.46    9.35
   8  -1  17  101.56   12.19
   8   1  17  120.78   11.49
  -8  -1 -18   42.35   14.34
   8  -1 -18   46.80    6.68
  -8   1  18   32.57    5.32
   8  -1  18   48.12    9.70
  -8  -1  18   52.81   14.63
  -8   1  18   64.39   14.91
   8  -1  18   58.22   11.51
   8   1  18   57.37   11.10
  -8  -1 -19   24.27   10.18
   8  -1 -19   12.05    3.13
  -8  -1  19   16.92    5.47
  -8   1  19   14.88    8.47
   8  -1  19    5.87    2.91
   8   1  19   22.47    7.18
  -8  -1 -20  620.87   29.72
   8  -1 -20  651.20   28.07
  -8  -1  20  762.21   37.42
  -8   1  20  730.73   33.94
   8  -1  20  610.23   33.44
   8   1  20  672.33   38.00
  -8  -1 -21   12.14    9.28
  -8  -1  21   24.42    8.59
  -8   1  21   18.36    7.89
   8  -1  21   18.13    6.89
   8   1  21   16.31    5.94
  -8  -1 -22   14.16    6.68
   8  -1  22    8.92    5.34
  -8  -1  22    9.59    4.41
  -8   1  22    8.32    5.40
   8  -1  22   12.75    6.67
   8   1  22   15.53    5.39
  -8  -1 -23   98.02    9.15
   8  -1  23  119.42   11.48
  -8  -1  23  117.05   16.78
  -8   1  23  122.55    7.02
   8  -1  23  133.00    8.06
   8   1  23  124.21   20.80
  -8  -1 -24   26.35    9.08
   8  -1  24   14.42    7.07
  -8  -1  24   20.70    4.26
  -8   1  24    8.92    4.87
   8  -1  24    8.07    3.45
   8   1  24   15.29    5.25
  -8  -1 -25   40.73    8.92
   8  -1  25   42.35   11.36
  -8  -1  25   46.64    9.01
  -8   1  25   42.54   12.61
   8  -1  25   24.07    7.02
   8   1  25   37.22    9.46
  -8  -1 -26   13.40    4.79
   8  -1  26    5.62    5.17
  -8  -1  26   14.87    4.18
  -8   1  26   10.03    4.67
   8  -1  26   25.20    6.77
   8   1  26    7.67    3.87
  -8  -1 -27   14.13    6.27
   8  -1  27   56.02   14.12
  -8  -1  27   41.27   10.61
  -8   1  27   35.33    9.93
   8  -1  27   43.34   13.46
   8   1  27   33.65    8.17
   8  -1  28  517.77   29.35
  -8  -1  28  486.70   30.71
  -8   1  28  427.50   28.02
   8  -1  28  513.14   36.76
   8   1  28  519.24   33.33
   8  -1  29    7.17    3.12
   8   1  29   24.83    9.42
  -8  -1  29   11.78    7.07
  -8   1  29   18.17    6.83
   8  -1  29   16.09    6.73
   8   1  29   18.01    5.33
   8  -1  30   18.37    6.33
   8   1  30   25.81    7.86
  -8  -1  30   15.75    6.57
  -8   1  30    9.11    4.68
   8  -1  30   26.64    6.17
   8   1  30   22.23    6.70
   8  -1  31   91.83   27.35
   8   1  31  109.33   17.23
  -8  -1  31   80.21   26.86
  -8   1  31   66.37   16.77
   8  -1  31  127.75   13.36
   8   1  31  118.92   11.99
   8  -1  32   -1.21    6.00
   8   1  32    2.98    9.40
  -8  -1  32    4.09    4.36
  -8   1  32    4.62    2.80
   8   1  32    7.54    4.28
   8  -1  33    9.16    3.81
   8   1  33   11.28    4.93
  -8  -1  33    8.26    7.72
  -8   1  33    8.79    3.92
   8  -1  33   11.20    7.09
   8   1  33   11.80    8.01
   8  -1  34   71.01   26.02
   8   1  34   63.19   15.14
  -8  -1  34   59.56   20.52
  -8   1  34   53.92   23.83
   8  -1  34   70.59   22.38
   8   1  34   76.02   17.72
   8  -1  35    2.06    5.76
   8   1  35    7.11    4.41
  -8  -1  35    7.01    5.12
  -8   1  35    1.38    4.36
   8  -1  35    0.96    2.32
   8   1  35   21.26    5.50
   8  -1  36   82.10   30.84
   8   1  36  103.67   18.14
  -8  -1  36   62.24   23.35
  -8   1  36   59.12   22.58
   8  -1  36   84.73   30.36
   8   1  36   79.94   18.03
   8  -1  37   -0.63    6.15
   8   1  37   -2.13    6.35
  -8  -1  37    4.81    4.89
  -8   1  37    7.11    2.51
   8  -1  37   13.20    4.78
   8   1  37    7.90    3.98
   9  -1   0    3.78    2.26
   9   1   0    0.10    1.99
   9   1   0    4.14    1.80
   9  -1   0   -0.32    1.34
   9  -1   0   -0.01    1.72
   9   1   0    2.04    1.53
   9  -1  -1   18.38    5.26
   9  -1   1   11.61    3.06
   9   1  -1   21.24    5.88
  -9  -1   1   16.32    6.34
   9  -1   1   15.96    4.29
   9  -1  -1   11.94    4.27
   9  -1   1   18.60    4.13
   9  -1  -1   17.94    3.33
   9   1   1   14.65    5.66
   9  -1  -2  351.61   19.32
   9  -1   2  383.30   13.62
   9   1  -2  407.54   13.59
   9   1   2  364.79   15.46
  -9  -1   2  432.86   16.05
   9  -1   2  396.14   47.13
   9  -1  -2  384.36   45.70
   9  -1   2  381.75   46.37
   9   1   2  431.38   18.64
   9  -1  -2  414.21   14.34
   9   1  -3  128.95    9.53
   9  -1  -3  207.61   12.25
   9  -1   3  215.54   19.30
   9   1  -3  213.86   16.22
   9   1   3  193.54   11.94
  -9  -1   3  211.14   16.37
   9  -1   3  208.75   11.68
   9  -1  -3  204.93   11.63
   9  -1   3  211.32   12.69
   9   1   3  229.86   16.12
   9  -1  -3  217.09   13.29
   9   1  -4   53.44    7.79
   9  -1  -4  110.54   10.76
   9  -1   4  111.81    7.86
   9   1  -4   88.55   12.17
   9   1   4   75.53   16.18
  -9   1   4  104.89   11.27
  -9  -1   4  120.81   17.63
   9  -1   4   91.88    7.49
   9  -1  -4   82.64    8.97
   9  -1   4  101.82    9.96
   9   1   4   89.35   13.78
   9   1  -5  342.61   11.53
   9  -1  -5  511.20   15.76
   9   1  -5  506.59   16.43
   9  -1   5  472.09   17.25
   9   1   5  444.85   17.09
  -9   1   5  513.92   17.16
   9  -1   5  510.81   17.70
  -9  -1   5  536.08   23.23
   9  -1  -5  481.75   15.11
   9  -1   5  486.61   15.59
   9   1   5  538.13   17.61
   9  -1  -6  289.20   17.80
   9   1  -6  275.96    4.80
   9  -1  -6  383.09    8.30
   9   1  -6  406.36   18.20
   9  -1   6  361.70   16.34
   9   1   6  339.66   18.63
   9  -1   6  387.27    7.55
  -9   1   6  402.50    7.45
  -9  -1   6  412.80    8.18
   9  -1  -6  382.30   15.46
   9  -1   6  378.13   15.29
   9   1   6  421.98   21.22
   9  -1  -7   28.48    6.17
   9   1  -7   25.50    5.32
   9  -1  -7   48.35    8.33
   9   1  -7   44.31    8.29
   9  -1   7   51.62   11.37
   9   1   7   53.84   11.41
   9  -1   7   41.71    8.90
  -9  -1   7   51.63    9.93
  -9   1   7   51.91   10.48
   9  -1  -7   42.43    6.67
   9  -1   7   50.77   11.30
   9   1   7   52.17   13.21
   9   1  -8  139.13   10.29
   9  -1  -8  171.78   11.43
   9   1  -8  169.77   11.90
   9  -1   8  183.17   15.94
   9   1   8  176.79   18.81
   9  -1   8  187.82   12.45
  -9   1   8  200.85   12.90
  -9  -1   8  191.72   15.16
   9  -1  -8  173.83   11.07
   9  -1   8  174.35   11.85
   9   1   8  187.77   13.39
   9  -1  -9    1.02    1.12
   9   1  -9    1.37    1.02
   9  -1  -9    6.72    3.29
   9   1  -9    5.52    1.47
   9  -1   9   13.04    6.64
   9  -1   9    3.90    2.23
  -9   1   9    7.19    3.17
  -9  -1   9    2.90    3.29
   9  -1  -9    4.41    1.42
   9  -1   9    1.55    2.36
   9   1   9    4.48    2.70
  -9  -1 -10  211.85   16.23
   9  -1 -10  217.79   13.84
   9   1 -10  230.55   14.34
   9  -1 -10  270.83   17.79
   9   1 -10  293.38   18.19
   9  -1  10  264.23   21.87
  -9  -1  10  308.28   20.71
  -9   1  10  297.35   20.67
   9  -1 -10  251.19   15.57
   9  -1  10  253.53   18.09
   9   1  10  349.59   30.50
  -9  -1 -11   84.20   19.47
   9   1 -11   74.66    3.58
   9  -1 -11   84.96    7.42
   9   1 -11   85.97    2.75
   9  -1  11   99.23   22.87
  -9  -1  11  102.87    6.94
  -9   1  11   99.38   11.49
   9  -1 -11   72.37    6.67
   9  -1  11   74.24   12.96
   9   1  11   93.51    7.72
   9  -1 -12    8.37    3.17
  -9  -1 -12   20.03    7.95
   9   1 -12   14.73    3.61
   9  -1 -12   23.44    7.15
   9   1 -12   19.62    4.01
   9  -1  12   18.14    9.79
  -9  -1  12   32.71    7.88
  -9   1  12   26.48    8.31
   9  -1 -12   15.41    4.82
   9  -1  12   21.99    6.36
   9   1  12   32.06   10.80
  -9  -1 -13  171.20   11.54
   9  -1 -13  207.69   11.78
   9  -1  13  182.60   12.91
  -9  -1  13  218.14   15.39
  -9   1  13  227.78   13.58
   9  -1  13  185.28   15.99
   9   1  13  217.70   23.45
  -9  -1 -14  187.37   26.33
   9  -1 -14  207.83   11.91
   9  -1  14  188.20   16.10
  -9  -1  14  212.84   13.90
  -9   1  14  229.03   15.65
   9  -1  14  172.22   11.50
   9   1  14  209.42   19.21
  -9  -1 -15  124.25   19.42
   9  -1 -15  168.49   11.12
   9  -1  15  147.28   28.13
  -9  -1  15  165.77   23.15
  -9   1  15  174.13   24.28
   9  -1  15  146.24   15.16
   9   1  15  184.46   22.47
  -9  -1 -16  436.17   17.61
   9  -1 -16  538.62   17.39
   9  -1  16  475.23   28.03
  -9  -1  16  581.55   20.29
  -9   1  16  587.95   21.16
   9  -1  16  470.62   21.17
   9   1  16  571.72   20.79
   9  -1 -17   57.06    6.44
  -9  -1  17   66.56   14.98
  -9   1  17   67.08   11.20
   9  -1  17   64.18   15.05
   9   1  17   74.57   14.89
  -9  -1 -18  131.38   24.62
   9  -1 -18  138.09    6.96
   9  -1  18  142.21   15.66
  -9  -1  18  157.44   11.99
  -9   1  18  159.94   11.98
   9  -1  18  144.70   16.74
   9   1  18  169.05   18.87
  -9  -1 -19   33.40    9.43
   9  -1  19   31.00    7.59
  -9  -1  19   42.88   12.44
  -9   1  19   42.78    9.81
   9  -1  19   36.72   10.97
   9   1  19   44.88   14.29
  -9  -1 -20   46.62   13.07
   9  -1  20   57.24   12.62
  -9  -1  20   69.05   14.59
  -9   1  20   52.58   11.98
   9  -1  20   42.88   12.07
   9   1  20   50.66   14.76
  -9  -1 -21    9.57    6.01
   9  -1  21    3.14    5.16
  -9  -1  21   10.82    4.08
  -9   1  21   10.98    4.15
   9  -1  21    3.83    3.04
   9   1  21   14.99    5.80
  -9  -1 -22   16.86    8.44
   9  -1  22   11.08    7.04
  -9  -1  22   20.92    5.17
  -9   1  22   17.06    3.54
   9  -1  22   15.86    4.58
   9   1  22   17.77    6.47
   9  -1  23   96.14   26.50
  -9  -1  23   91.47   24.63
  -9   1  23   93.18   21.54
   9  -1  23   78.11   16.56
   9   1  23   72.40   20.62
   9  -1  24  392.73   23.13
  -9  -1  24  451.60   29.88
  -9   1  24  411.45   23.63
   9  -1  24  402.73   30.34
   9   1  24  382.81   23.23
   9  -1  25   10.47    5.59
   9   1  25   32.15   13.49
  -9   1  25   25.63    7.29
   9  -1  25   20.78    5.79
   9  -1  26    7.90    5.28
   9   1  26   10.96    5.24
  -9  -1  26    4.26    5.74
  -9   1  26    3.89    1.61
   9  -1  26    3.33    4.24
   9   1  26   -1.15    5.31
   9  -1  27   18.63    8.82
   9   1  27   26.99   10.06
  -9  -1  27   30.03   10.46
  -9   1  27   28.23    8.97
   9  -1  27   32.07   12.15
   9   1  27   36.79   11.06
   9  -1  28    8.69    5.29
   9   1  28   13.06    7.69
  -9  -1  28    7.83    6.40
  -9   1  28    6.82    3.06
   9  -1  28   10.82    2.82
   9   1  28   17.92    7.19
   9  -1  29    2.42    5.23
   9   1  29    2.54    3.65
  -9  -1  29    6.17    6.67
  -9   1  29    5.50    2.19
   9  -1  29    3.84    2.28
   9   1  29    5.45    2.26
   9  -1  30   51.58   16.47
   9   1  30   48.23   16.82
  -9  -1  30   45.43   12.93
  -9   1  30   36.11   10.45
   9  -1  30   56.76   16.54
   9   1  30   36.74   15.87
   9  -1  31   22.91    9.84
   9   1  31   41.87   11.57
  -9  -1  31   18.31    7.66
  -9   1  31   23.83    8.45
   9  -1  31   22.72   10.25
   9   1  31   36.58    9.91
   9  -1  32  178.33   25.00
   9   1  32  152.93   38.20
  -9  -1  32  154.37   18.46
  -9   1  32  149.98   17.62
   9  -1  32  169.14   15.14
   9   1  32  135.79   34.18
   9  -1  33   51.09   13.00
   9   1  33   58.36   17.55
  -9  -1  33   42.13    9.65
  -9   1  33   29.25   11.85
   9  -1  33   36.18   15.66
   9   1  33   54.82   12.47
   9  -1  34   10.04    5.15
   9   1  34   13.77    9.39
  -9  -1  34    5.88    5.88
  -9   1  34    5.12    3.20
   9  -1  34   31.80   10.35
   9   1  34   26.70    8.17
   9  -1  35   50.77   19.89
   9   1  35   53.93   18.56
  -9  -1  35   36.87   10.58
  -9   1  35   31.97   12.19
   9  -1  35   51.15   13.21
   9   1  35   41.23   20.67
  10  -1   0  209.78   16.09
  10   1   0  217.11   19.81
  10  -1   0  233.16   15.32
  10  -1   0  229.87   14.52
  10   1   0  238.79   19.79
  10  -1  -1  252.90   16.81
  10  -1   1  209.52   19.74
  10   1   1  233.21   16.49
  10   1  -1  234.61   24.07
  10  -1   1  258.55   16.13
  10  -1  -1  255.95   15.83
  10  -1   1  253.03   16.33
  10  -1  -1  250.16   16.10
  10   1   1  267.78   18.93
  10   1  -1  257.91   19.54
  10  -1  -2  298.74   20.37
  10  -1   2  301.55   20.68
  10   1  -2  302.32   22.56
  10   1   2  286.53   18.42
 -10  -1   2  343.54   21.75
  10  -1   2  311.55   18.88
  10  -1  -2  313.70   19.36
  10  -1   2  309.49   19.34
  10   1   2  314.08   22.32
  10  -1  -2  317.48   19.26
  10  -1  -3  106.50   15.62
  10  -1   3  140.25   17.27
  10   1  -3  123.06    9.87
  10   1   3  108.41   10.90
 -10  -1   3  130.70   16.23
  10  -1   3  108.96    7.82
  10  -1  -3  109.27   12.96
  10  -1   3  116.67    8.33
  10   1   3  129.57   15.65
  10  -1  -3  126.84    8.52
  10  -1  -4   33.60    8.63
  10   1  -4   38.11    9.84
  10  -1   4   40.56    8.48
  10   1   4   49.25   10.52
 -10  -1   4   48.67   14.19
  10  -1   4   28.41    6.17
  10  -1  -4   34.72    5.56
  10  -1   4   45.69    9.51
  10   1   4   47.45    5.94
  10  -1  -4   42.56    8.12
  10  -1  -5    1.98    2.64
  10   1  -5    0.89    2.14
  10  -1   5    4.44    2.60
  10   1   5    4.56    4.39
 -10   1   5    5.03    3.08
 -10  -1   5   -3.34    3.04
  10  -1   5    3.68    1.76
  10  -1  -5    3.41    1.75
  10  -1   5    2.51    1.61
  10   1   5    1.61    2.02
  10   1  -6  234.21   23.57
  10  -1  -6  336.48   14.51
  10   1  -6  324.14   17.40
  10  -1   6  292.46   18.11
  10   1   6  303.69   18.78
 -10   1   6  373.98   15.72
 -10  -1   6  356.26   15.51
  10  -1   6  332.42   15.85
  10  -1  -6  302.05   12.29
  10  -1   6  318.55   14.89
  10   1   6  334.48   15.40
  10   1  -7   18.65    4.51
  10  -1  -7   37.26    9.18
  10   1  -7   36.67    8.67
  10  -1   7   40.17   13.06
  10   1   7   32.00    9.75
 -10   1   7   38.92    9.23
 -10  -1   7   43.40    9.56
  10  -1   7   25.99    8.67
  10  -1  -7   26.22    6.83
  10  -1   7   33.17    6.90
  10   1   7   41.78    8.53
  10   1  -8   23.03    6.35
  10  -1  -8   55.47    7.09
  10   1  -8   53.37   10.71
  10  -1   8   58.58   18.23
  10   1   8   49.23   12.48
 -10   1   8   56.81   11.34
 -10  -1   8   60.05   10.48
  10  -1  -8   32.49    6.54
  10  -1   8   48.29   11.59
  10   1   8   45.35   10.90
  10   1  -9  156.55    8.16
  10  -1  -9  201.99   10.96
  10   1  -9  219.72   11.31
  10  -1   9  233.19   25.17
  10   1   9  199.05   28.51
 -10  -1   9  226.78   13.41
 -10   1   9  222.70   12.33
  10  -1  -9  188.34   11.17
  10  -1   9  189.79   10.45
  10   1   9  215.87   19.61
  10  -1 -10   35.05    5.68
  10   1 -10   44.59    4.92
  10  -1 -10   58.20   12.41
  10   1 -10   52.38    7.72
  10  -1  10   62.40    8.84
  10   1  10   47.24   13.51
 -10   1  10   67.36    9.50
 -10  -1  10   62.40   15.29
  10  -1 -10   41.08    6.86
  10  -1  10   52.39   13.36
  10   1  10   56.77    7.15
  10   1 -11  171.67   11.86
  10  -1 -11  214.79   13.36
  10   1 -11  214.37   11.98
  10  -1  11  191.01   16.58
  10   1  11  179.62   14.07
 -10  -1  11  225.87   21.02
 -10   1  11  243.60   16.44
  10  -1 -11  188.37   10.28
  10  -1  11  201.07   19.92
  10   1  11  233.63   21.74
  10  -1 -12  241.07   12.82
  10   1 -12  210.51   11.45
  10  -1  12  212.71   25.65
  10   1  12  198.48   18.15
 -10  -1  12  230.19   13.15
 -10   1  12  234.18   13.45
  10  -1  12  186.69   17.94
  10   1  12  212.15   15.54
  10  -1 -13   32.62    7.61
  10   1 -13   24.34    4.14
  10  -1  13   39.24   10.54
  10   1  13   22.02    6.58
 -10   1  13   40.60    8.86
 -10  -1  13   29.38    7.98
  10  -1  13   22.72    7.19
  10   1  13   44.51   12.83
  10  -1 -14  284.68   14.23
  10  -1  14  225.18   16.08
  10   1  14  242.29   27.57
 -10  -1  14  286.78   17.62
 -10   1  14  295.11   16.73
  10  -1  14  253.04   21.56
  10   1  14  272.11   14.98
  10  -1 -15    1.81    1.44
  10  -1  15   -1.50    7.40
  10   1  15    5.94    5.93
 -10  -1  15    6.90    5.16
 -10   1  15    6.11    3.54
  10  -1  15    4.40    2.88
  10   1  15    3.09    2.53
  10  -1 -16   31.31    6.89
  10  -1  16   44.91   13.10
  10   1  16   42.37   13.79
 -10  -1  16   51.12   13.55
 -10   1  16   52.07   11.76
  10  -1  16   46.38   10.58
  10   1  16   49.62   15.43
  10  -1  17   19.96    7.79
  10   1  17   26.47    9.43
 -10  -1  17   41.92   11.48
 -10   1  17   38.42    8.25
  10  -1  17   34.69   11.00
  10   1  17   36.84    8.93
  10  -1  18    0.38    3.49
  10   1  18   -1.31    6.17
 -10   1  18   -0.24    2.33
  10  -1  18    4.78    3.01
  10   1  18    9.32    3.66
  10  -1  19  224.14   43.59
  10   1  19  286.53   20.95
 -10  -1  19  339.35   23.01
 -10   1  19  316.28   20.59
  10  -1  19  253.11   18.72
  10   1  19  304.84   21.37
  10  -1  20  349.80   37.50
  10   1  20  345.77   20.29
 -10  -1  20  458.88   27.33
 -10   1  20  431.04   23.13
  10  -1  20  356.00   19.70
  10   1  20  432.31   30.43
  10  -1  21   59.38   15.06
  10   1  21   61.91   11.50
 -10  -1  21   75.60   15.65
 -10   1  21   70.96   13.89
  10  -1  21   60.40   15.27
  10   1  21   65.24   16.82
  10  -1  22    6.56    4.04
  10   1  22   33.43    9.33
 -10  -1  22   25.40    6.35
 -10   1  22   17.93    6.58
  10  -1  22   30.84    8.40
  10   1  22   23.02    5.36
  10  -1  23   22.54    7.53
  10   1  23   25.27    6.27
 -10  -1  23   27.47    6.62
 -10   1  23   21.49    7.68
  10  -1  23   26.06    7.36
  10   1  23   19.76    4.31
  10  -1  24   14.34    4.98
  10   1  24   34.27   10.48
 -10  -1  24   29.39    8.00
 -10   1  24   28.83   11.84
  10  -1  24   23.48   10.26
  10   1  24   23.72    7.48
  10  -1  25    9.50    7.07
  10   1  25   10.47    6.69
 -10  -1  25   16.33    4.34
 -10   1  25   16.31    3.35
  10  -1  25   18.87    6.67
  10   1  25    8.10    5.98
  10  -1  26   67.13   17.63
  10   1  26   53.91   17.18
 -10  -1  26   63.70   16.14
 -10   1  26   51.28   13.12
  10  -1  26   52.41   15.61
  10   1  26   59.25   10.86
  10  -1  27   42.41    8.00
  10   1  27   51.12   12.82
 -10  -1  27   34.20   12.29
 -10   1  27   53.89   13.69
  10  -1  27   48.88   16.93
  10   1  27   42.17   17.21
  10  -1  28  195.96   17.81
  10   1  28  221.46   20.69
 -10  -1  28  235.16   13.36
 -10   1  28  215.36   20.58
  10  -1  28  195.38   22.23
  10   1  28  188.16   27.41
  10  -1  29   84.46   18.39
  10   1  29   59.63   17.26
 -10  -1  29   66.21   18.98
 -10   1  29   76.78   20.89
  10  -1  29   76.49   19.92
  10   1  29   76.24   25.62
  10  -1  30    0.87    4.40
  10   1  30   14.95    7.75
 -10  -1  30    7.03    4.12
 -10   1  30    2.21    4.05
  10  -1  30   -5.67    5.46
  10   1  30    7.92    3.73
  10  -1  31   51.58   11.86
  10   1  31   53.42   16.62
 -10  -1  31   38.70   12.63
 -10   1  31   36.60    9.29
  10  -1  31   46.90   17.41
  10   1  31   47.39   19.09
  10  -1  32   -1.14    7.50
  10   1  32   -0.17    3.40
 -10  -1  32    3.55    4.36
 -10   1  32    4.11    4.25
  10  -1  32   10.23    4.47
  10   1  32   -2.52    5.42
  10  -1  33   32.03   16.56
  10   1  33   42.59    9.34
 -10  -1  33   27.50   14.07
 -10   1  33   30.87    7.76
  10  -1  33   23.83    8.45
  10   1  33   33.69   13.23
  10  -1  34   84.72   27.24
  10   1  34   64.45   21.09
 -10  -1  34   44.29   18.57
  10  -1  34   88.18   18.87
  10   1  34   53.60   21.53
  11  -1   0    3.75    2.82
  11   1   0    1.31    2.76
  11  -1   0    0.13    1.72
  11   1   0    2.87    2.61
  11  -1  -1  133.71   10.75
  11  -1   1  130.08   11.55
  11   1  -1  105.19    9.57
  11   1   1  123.52   11.56
  11  -1   1  129.84    8.97
  11  -1  -1  127.56    8.05
  11   1   1  116.66    7.97
  11   1  -1  136.31   11.37
  11  -1  -2  308.46   15.27
  11  -1   2  274.00   23.34
  11   1  -2  309.24   12.16
  11   1   2  304.07   13.73
  11  -1   2  293.63   10.46
  11   1   2  327.19   12.28
  11  -1  -2  309.07   11.87
  11   1  -2  305.67   11.73
  11  -1  -3  114.06   22.63
  11  -1   3   89.74   19.44
  11   1  -3   95.47    7.79
  11   1   3   88.11    7.50
  11  -1   3  100.81    5.71
  11   1   3   87.10   14.27
  11  -1  -3   84.76   10.44
  11  -1  -4  224.10   17.64
  11  -1   4  246.36   21.24
  11   1  -4  200.37   19.89
  11   1   4  201.60   16.70
 -11  -1   4  222.91   17.21
  11  -1   4  219.46   14.19
  11   1   4  233.95   13.05
  11  -1  -4  245.52   13.19
  11  -1  -5  167.55   11.86
  11   1  -5  176.72   10.75
  11  -1   5  188.21   19.06
  11   1   5  171.25   13.85
 -11  -1   5  202.74   12.81
  11  -1   5  190.35   12.49
  11   1   5  205.22   18.08
  11  -1  -5  187.88   12.90
  11  -1  -6   80.11   13.82
  11   1  -6   77.16    8.09
  11  -1   6   88.31   17.58
  11   1   6   68.71   19.28
 -11   1   6   86.79    6.70
 -11  -1   6   86.14    6.29
  11  -1   6   69.81   10.43
  11   1   6   83.43   14.93
  11  -1  -7  283.93   14.34
  11   1  -7  292.40   15.79
  11  -1   7  257.87   18.71
  11   1   7  248.98   20.63
 -11   1   7  297.17   16.07
 -11  -1   7  315.23   11.39
  11  -1   7  262.15   15.13
  11   1   7  330.73   16.49
  11  -1  -8  153.60   13.37
  11   1  -8  164.37    9.51
  11  -1   8  180.97   14.27
  11   1   8  171.41   17.72
 -11   1   8  178.68    9.49
 -11  -1   8  173.53   12.75
  11  -1   8  160.97   17.36
  11   1   8  171.46   14.63
  11  -1  -9    3.60    3.48
  11   1  -9    1.02    1.55
  11  -1   9    9.52    5.56
  11   1   9   -1.55    5.89
 -11   1   9    2.19    1.76
 -11  -1   9   16.82    7.15
  11  -1   9    4.32    2.07
  11   1   9    4.37    5.93
  11  -1 -10  381.78   18.01
  11   1 -10  385.31   17.73
  11  -1  10  338.34   22.79
  11   1  10  338.00   25.59
 -11   1  10  400.72   20.64
 -11  -1  10  381.25   18.48
  11  -1  10  326.73   16.24
  11   1  10  375.33   18.29
  11  -1 -11   44.84   10.16
  11   1 -11   35.51    8.40
  11  -1  11   50.38   16.35
  11   1  11   39.12    9.69
 -11  -1  11   61.19   11.72
 -11   1  11   49.02   11.89
  11  -1  11   40.65   11.50
  11   1  11   54.02   13.63
  11  -1 -12   18.82    5.55
  11   1 -12   11.36    4.33
  11  -1  12   25.41    8.41
  11   1  12   12.79    4.47
 -11  -1  12   17.74    4.59
 -11   1  12   15.36    4.54
  11  -1  12   21.73    7.33
  11   1  12   16.64    5.52
  11  -1 -13   28.15    8.38
  11  -1  13   45.80    9.44
  11   1  13   33.38   11.67
 -11   1  13   32.45    9.66
 -11  -1  13   35.46    8.51
  11  -1  13   34.35   10.26
  11   1  13   46.04    6.74
  11  -1 -14    9.99    3.66
  11  -1  14   14.60    7.56
  11   1  14    6.89    4.29
 -11  -1  14    8.61    2.24
  11  -1  14    2.61    3.57
  11   1  14    8.17    3.41
  11  -1  15  360.85   32.13
  11   1  15  373.61   35.42
 -11  -1  15  452.22   25.22
 -11   1  15  463.12   24.79
  11  -1  15  376.09   21.54
  11   1  15  420.72   31.32
  11  -1  16  269.35   25.12
  11   1  16  218.69   23.00
 -11  -1  16  261.29   16.28
 -11   1  16  272.96   18.06
  11  -1  16  218.82   22.81
  11   1  16  267.47   21.25
  11  -1  17  133.18   31.30
  11   1  17  122.18   30.43
 -11  -1  17  146.78   21.25
 -11   1  17  150.81   13.25
  11  -1  17  141.40   15.16
  11   1  17  155.41   17.66
  11  -1  18   63.21   11.86
  11   1  18   49.54   12.64
 -11  -1  18   93.94   14.21
 -11   1  18   70.86   17.38
  11  -1  18   57.55   17.89
  11   1  18   67.77   20.54
  11  -1  19    7.82    2.90
  11   1  19   10.58    5.11
 -11  -1  19   10.68    4.68
 -11   1  19    9.66    5.97
  11  -1  19    5.54    2.90
  11   1  19    6.61    2.07
  11  -1  20   21.18    6.03
  11   1  20   18.39    5.86
 -11  -1  20   19.49    8.11
 -11   1  20   12.48    3.97
  11  -1  20   18.47    6.17
  11   1  20   17.89    6.97
  11  -1  21    1.87    2.84
  11   1  21   -2.76    5.48
 -11   1  21    2.76    3.44
  11  -1  21   -0.76    4.57
  11   1  21    5.64    5.40
  11  -1  22   62.92   11.14
  11   1  22   50.03   12.02
 -11  -1  22   52.01   15.55
 -11   1  22   47.95   13.02
  11  -1  22   36.86   12.18
  11   1  22   46.08   10.04
  11  -1  23  147.15   26.62
  11   1  23  137.41   11.45
 -11  -1  23  136.79   21.43
 -11   1  23  141.55    9.08
  11  -1  23  135.84   16.17
  11   1  23  139.52   13.98
  11  -1  24   96.24   14.21
  11   1  24  104.51   11.43
 -11  -1  24   81.11   23.99
 -11   1  24   73.68   19.89
  11  -1  24   78.58   17.15
  11   1  24   91.71   10.22
  11  -1  25   87.14   27.45
  11   1  25  108.10   20.37
 -11  -1  25   91.02   22.82
 -11   1  25   77.49   19.03
  11  -1  25   77.46   20.42
  11   1  25   89.49   17.08
  11  -1  26   34.50   11.52
  11   1  26   24.14   12.04
 -11  -1  26   33.34   10.73
 -11   1  26   26.29    8.89
  11  -1  26   30.90    8.78
  11   1  26   41.27   10.53
  11  -1  27   24.50    8.15
  11   1  27   34.65    9.75
 -11  -1  27   23.14    8.44
 -11   1  27   21.23   10.56
  11  -1  27   23.67    8.92
  11   1  27   31.64    9.05
  11  -1  28    9.00    6.69
  11   1  28   -0.83    3.15
 -11  -1  28    3.46    3.45
 -11   1  28    2.27    3.69
  11  -1  28    5.53    3.35
  11   1  28   -2.18    5.33
  11  -1  29   24.13    7.63
  11   1  29   32.11   11.01
 -11  -1  29   17.58    7.15
 -11   1  29   24.53   11.48
  11  -1  29   15.82    6.23
  11   1  29   12.72    4.47
  11  -1  30   40.73   16.86
  11   1  30   29.60    8.31
 -11  -1  30   33.73   11.24
 -11   1  30   25.70    9.90
  11  -1  30   38.36   11.07
  11   1  30   22.37    8.12
  11  -1  31   11.90    4.72
  11   1  31   27.69    6.98
 -11  -1  31   13.77    5.24
 -11   1  31   11.08    6.17
  11  -1  31   14.35    5.49
  11   1  31   11.83   11.28
  11  -1  32   53.13   23.89
  11   1  32   66.75   17.10
 -11  -1  32   58.73   21.93
  11  -1  32   55.31   18.67
  11   1  32   45.84   11.52
  12  -1   0   89.24    7.26
  12   1   0   97.33   11.73
  12  -1   0   80.81    5.61
  12   1   0   81.12   13.77
  12  -1  -1  104.19   15.18
  12  -1   1   96.65   16.70
  12   1   1   92.92   13.34
  12   1  -1   94.80   16.26
  12  -1   1   80.54    5.71
  12  -1  -1   83.73    3.36
  12   1   1   87.75   13.68
  12   1  -1   91.05   13.35
  12  -1  -2  194.33    9.42
  12  -1   2  196.37   18.84
  12   1  -2  199.36   15.54
  12   1   2  203.17   13.96
  12  -1   2  186.11    5.37
  12  -1  -2  192.72    4.75
  12   1   2  192.24    6.57
  12   1  -2  201.53    6.15
  12  -1  -3  262.01   13.91
  12  -1   3  253.75   24.03
  12   1  -3  261.72   16.01
  12   1   3  245.19   19.58
  12  -1   3  259.47   10.89
  12   1   3  267.52   23.03
  12  -1  -3  262.14    9.56
  12   1  -3  271.34   10.04
  12  -1  -4   54.69   10.16
  12   1  -4   57.46   12.32
  12  -1   4   63.76   17.24
  12   1   4   72.74   14.74
  12  -1   4   47.04    7.02
  12   1   4   73.44   14.19
  12  -1  -4   47.77    9.68
  12   1  -4   61.55    6.84
  12  -1  -5   32.95   11.72
  12   1  -5   39.91   10.05
  12  -1   5   53.03   12.76
  12   1   5   33.73   10.07
 -12  -1   5   42.01   11.12
  12  -1   5   37.37    8.26
  12   1   5   24.98   10.24
  12  -1  -5   45.24    9.32
  12  -1  -6  156.51   13.27
  12   1  -6  144.34   15.10
  12  -1   6  148.91   31.99
  12   1   6  158.41   18.28
 -12  -1   6  164.17   12.66
  12  -1   6  135.76    6.88
  12   1   6  142.25   12.57
  12  -1  -6  157.21    5.34
  12  -1  -7   35.34    9.29
  12   1  -7   33.07    7.67
  12  -1   7   21.13    5.07
  12   1   7   35.36    8.30
 -12  -1   7   30.71    7.14
  12  -1   7   25.34    6.14
  12   1   7   33.53    7.09
  12  -1  -8  186.28    6.96
  12   1  -8  173.13    7.39
  12  -1   8  173.10   11.93
  12   1   8  169.59   14.61
 -12   1   8  191.73    9.90
 -12  -1   8  188.45   13.79
  12  -1   8  171.65    6.13
  12   1   8  186.98   14.89
  12  -1  -9   52.42   13.79
  12   1  -9   61.43    8.53
  12  -1   9   53.47   10.72
  12   1   9   64.06   11.00
 -12   1   9   60.29    8.63
 -12  -1   9   70.90    9.69
  12   1   9   64.33   12.88
  12  -1 -10   15.62    4.77
  12   1 -10   13.45    4.83
  12  -1  10   18.63    6.31
  12   1  10    8.36    4.01
 -12   1  10   18.13    4.41
 -12  -1  10   17.13    5.77
  12  -1  10   14.17    5.86
  12   1  10   18.78    9.50
  12  -1 -11  410.76   21.12
  12  -1  11  324.89   30.31
  12   1  11  343.69   30.79
 -12  -1  11  425.72   22.97
 -12   1  11  450.30   23.71
  12  -1  11  368.55   22.94
  12   1  11  414.97   22.88
  12  -1 -12   22.57    4.81
  12  -1  12   25.66   11.28
  12   1  12   31.51    8.78
 -12   1  12   31.84    8.91
 -12  -1  12   36.74    9.40
  12  -1  12   24.19    6.81
  12   1  12   34.89   11.51
  12  -1  13   59.02   15.98
  12   1  13   61.46   13.02
 -12  -1  13   67.25   13.97
 -12   1  13   73.95    8.58
  12  -1  13   55.73    8.91
  12   1  13   55.19   13.34
  12  -1  14  132.94   23.33
  12   1  14  127.64   10.31
 -12   1  14  140.14    4.54
 -12  -1  14  157.29   10.96
  12  -1  14  117.79   14.65
  12   1  14  142.31   15.04
  12  -1  15   16.31    6.41
  12   1  15    8.32    4.84
 -12   1  15   16.27    4.80
 -12  -1  15   22.17    6.29
  12  -1  15   12.03    6.13
  12   1  15   16.58    9.58
  12  -1  16   37.02    8.27
  12   1  16   28.54    8.82
 -12   1  16   30.05    7.70
 -12  -1  16   43.14    8.24
  12  -1  16   17.30    3.80
  12   1  16   41.37   11.36
  12  -1  17   22.15    5.73
  12   1  17    8.80    4.89
 -12   1  17   19.54    5.85
 -12  -1  17   18.33    6.20
  12  -1  17   14.70    3.56
  12   1  17   12.36    4.00
  12  -1  18   30.12    8.64
 -12  -1  18   22.36    7.04
 -12   1  18   22.36    6.07
  12  -1  18   19.89    6.82
  12   1  18   34.41    9.55
  12  -1  19  249.33   24.75
  12   1  19  222.94   18.84
 -12   1  19  305.70   17.80
 -12  -1  19  320.37   21.92
  12  -1  19  245.09   17.14
  12   1  19  271.07   18.95
  12  -1  20   51.26   16.32
  12   1  20   68.62   13.35
 -12  -1  20   77.79   20.94
 -12   1  20   76.58   18.27
  12  -1  20   50.93   14.83
  12   1  20   64.39   16.25
  12  -1  21  104.66   23.27
  12   1  21   84.52   15.91
 -12  -1  21  107.47   18.43
  12  -1  21   86.85   18.99
  12   1  21  104.86   15.99
  12  -1  22   56.58   15.30
  12   1  22   57.93   23.66
 -12  -1  22   53.69   14.25
  12  -1  22   46.37   14.16
  12   1  22   53.45   15.76
  12  -1  23    8.68    6.01
  12   1  23    7.89    6.53
 -12  -1  23   12.46    6.83
  12  -1  23    8.08    2.98
  12  -1  24    0.35    3.20
  12   1  24    6.99    5.67
 -12  -1  24   -0.35    3.65
  12  -1  24    4.99    1.95
  12  -1  25   11.26    8.38
  12   1  25    8.13    4.31
 -12  -1  25    9.67    4.97
  12  -1  25    5.94    2.78
  12   1  25   19.86    7.52
  12  -1  26    7.32    4.02
  12   1  26   14.01    4.86
 -12  -1  26   22.54    6.98
  12   1  26   18.82    4.02
  12  -1  27   40.45   17.63
  12   1  27   44.93   11.78
 -12  -1  27   43.20   11.66
  12  -1  27   27.72    9.05
  12   1  27   37.44   11.99
  12  -1  28   54.47   12.24
  12   1  28   29.80   11.07
 -12  -1  28   27.11   12.21
  12  -1  28   26.46    9.90
  12   1  28   36.26   10.70
  12  -1  29   92.77   23.58
  12   1  29   65.70   28.19
 -12  -1  29   67.14   20.54
  12  -1  29   91.37   12.64
  12   1  29   82.03   25.63
  13  -1   0    1.06    2.12
  13   1   0   -1.69    3.39
  13   1   0    1.35    1.82
  13  -1  -1  195.26   16.33
  13  -1   1  213.13   15.26
  13   1  -1  201.08   20.37
  13   1   1  183.31   12.18
  13   1   1  199.54   10.52
  13   1  -1  208.21   11.73
  13  -1  -2   47.57   11.15
  13  -1   2   52.41   11.82
  13   1  -2   44.82   12.92
  13   1   2   48.04   12.19
  13   1   2   46.70   10.30
  13   1  -2   47.82   12.78
  13  -1  -3   83.05   11.49
  13   1  -3   66.47    8.71
  13  -1   3   71.54   13.42
  13   1   3   78.47   10.79
  13   1   3   85.09   10.08
  13   1  -3   86.00    7.89
  13  -1  -4  115.56   14.63
  13  -1   4   97.63   10.33
  13   1  -4   89.51   12.20
  13   1   4   80.24   18.26
  13   1   4   96.01    7.06
  13   1  -4   97.98    9.97
  13  -1  -5   64.59    7.13
  13   1  -5   49.79   13.76
  13  -1   5   52.92   14.19
  13   1   5   61.33   10.28
  13   1   5   69.74   13.36
  13   1  -5   65.96    7.27
  13  -1  -6   12.02    6.20
  13   1  -6    8.79    3.54
  13  -1   6   15.40    5.03
  13   1   6    8.95    3.88
  13  -1  -7  326.92   22.04
  13   1  -7  329.45   19.30
  13  -1   7  303.38   26.93
  13   1   7  298.92   22.54
 -13  -1   7  322.25   22.54
  13  -1  -8    8.27    2.11
  13  -1   8    8.11    6.62
  13   1   8   18.59    7.61
 -13  -1   8   10.83    3.40
  13   1   8    7.29    4.80
  13  -1  -9    3.98    2.06
  13  -1   9    9.52    5.80
 -13  -1   9    1.97    0.90
  13   1   9    3.59    3.66
  13  -1  10   71.59   17.23
  13   1  10   54.14   15.15
 -13  -1  10   71.95   16.60
  13   1  10   67.49   19.00
  13  -1  11   45.04   11.15
  13   1  11   33.68    8.15
 -13  -1  11   40.48   12.79
  13  -1  11   28.14    8.95
  13   1  11   42.55    9.81
  13  -1  12   52.95   11.32
  13   1  12   47.08   14.16
 -13  -1  12   48.17   11.75
  13   1  12   32.87    9.61
  13  -1  13    5.51    4.22
  13   1  13   10.86    6.41
 -13  -1  13    8.09    2.45
  13  -1  13    6.62    2.86
  13   1  13    5.14    2.67
  13  -1  14    5.58    5.17
  13   1  14   -4.23    6.35
  13  -1  14    2.45    1.55
  13   1  14    6.52    4.11
  13  -1  15  260.76   22.61
  13   1  15  220.33   18.48
 -13  -1  15  288.37   21.40
  13   1  15  246.78   20.03
  13  -1  16   26.92    9.34
  13   1  16   37.64   10.43
 -13  -1  16   32.15   10.96
  13  -1  16   16.51    7.35
  13   1  16   25.74   10.12
  13  -1  17   78.98   13.98
  13   1  17   73.99   15.30
 -13  -1  17   82.02   13.75
  13  -1  17   65.30   16.86
  13   1  17   65.29   16.75
  13  -1  18   89.86   29.97
  13   1  18   78.89   18.28
 -13  -1  18   81.39   20.28
  13  -1  18   73.48    7.64
  13   1  18   89.68    8.33
  13  -1  19    2.09    3.71
  13   1  19   -1.99    6.25
 -13  -1  19    2.42    2.95
  13  -1  19    2.31    1.83
  13   1  19    5.66    3.05
  13  -1  20   13.89    5.75
  13   1  20   16.13    5.79
 -13  -1  20   20.07    8.21
  13  -1  20   12.65    3.61
  13   1  20   19.57    7.53
  13  -1  21    6.44    4.38
  13   1  21    9.39    4.87
 -13  -1  21    2.27    1.51
  13   1  21    6.37    3.45
  13  -1  22   40.90   13.59
  13   1  22   34.31   11.41
 -13  -1  22   38.51   11.78
  13   1  22   28.00    9.88
  13  -1  23  122.56   33.94
  13   1  23  106.54   29.16
  13   1  23  140.13   18.72
  13  -1  24    4.13    4.62
  13   1  24   10.94    7.45
  13  -1  24    6.78    2.48
  13   1  24   14.07    6.73
  13  -1  25   91.46   34.75
  13   1  25   95.73   29.73
  13   1  25  117.04   16.18
  13  -1  26   50.76   23.27
  13   1  26   59.80   15.77
  13   1  26   37.99   11.72
  13  -1  27    7.37    5.52
  13   1  27   11.14    4.85
  13   1  27    8.47    4.96
  14  -1   0   87.03   15.71
  14   1   0   88.40   21.17
  14  -1  -1   38.00   13.77
  14  -1   1   33.76    7.99
  14   1  -1   24.37    9.07
  14   1   1   35.15   12.82
  14  -1  -2    5.55    3.53
  14  -1   2    8.78    5.29
  14   1  -2   11.71    3.84
  14   1   2    5.73    4.89
  14  -1  -3  178.23   16.56
  14  -1   3  197.30   19.33
  14   1  -3  188.03   21.51
  14   1   3  193.89   21.95
  14  -1  -4    5.92    3.86
  14   1  -4    0.95    1.92
  14  -1   4    4.92    3.52
  14   1   4   14.19    3.96
  14   1   4    4.80    2.39
  14  -1  -5   32.79    9.33
  14   1  -5   33.22    6.22
  14  -1   5   25.94    8.27
  14   1   5   32.66   11.85
  14   1   5   29.24    7.91
  14  -1  -6   14.29    5.51
  14  -1   6   12.27    6.61
  14   1   6    8.74    6.54
  14   1   6   10.92    3.15
  14  -1  -7   32.82    8.94
  14  -1   7   28.14   10.92
  14   1   7   36.00   10.28
  14   1   7   39.76    7.35
  14  -1   8  154.54   11.89
  14   1   8  152.91   15.60
  14  -1   9   30.69    6.80
  14   1   9   31.30    6.60
  14   1   9   26.86    7.45
  14  -1  10   38.75   13.70
  14   1  10   44.60   11.05
  14   1  10   38.75   10.68
  14  -1  11  401.95   21.01
  14   1  11  340.01   26.65
  14   1  11  379.49   17.07
  14  -1  12   13.81   10.65
  14   1  12   25.39    8.87
  14   1  13   16.17    5.97
  14   1  13   24.29    7.40
  14  -1  14   47.72    9.35
  14   1  14   42.43   10.26
  14   1  14   42.80    8.79
  14  -1  15    6.64    3.69
  14   1  15   11.06    7.57
  14   1  15   11.58    5.14
  14  -1  16   31.86    8.23
  14   1  16   23.29    8.41
  14   1  16   26.93    8.42
  14  -1  17    2.78    6.09
  14   1  17    9.02    6.64
  14   1  17    3.58    1.68
  14  -1  18   39.84   19.25
  14   1  18   47.74    9.41
  14   1  18   39.61   11.67
  14  -1  19  103.03   24.81
  14   1  19  140.57   15.90
  14   1  19   98.08   12.86
  14  -1  20    2.30    3.72
  14   1  20    1.86    7.77
  14   1  20    6.36    2.39
  14  -1  21   38.99    9.72
  14   1  21   42.70   11.22
  14   1  21   27.97   15.33
  14  -1  22   54.84   17.14
  14   1  22   48.26   18.75
  14   1  22   30.81   10.67
  14  -1  23    3.69    4.87
  14   1  23    6.33    5.29
  14   1  23    5.58    3.22
  14  -1  24    6.21    6.64
  14   1  24    8.47    3.56
  14   1  24    3.85    3.85
  15  -1   0    1.35    2.12
  15   1   0    1.46    2.40
  15  -1  -1   56.78    8.62
  15  -1   1   70.61   16.19
  15   1  -1   55.10   16.45
  15   1   1   53.07   13.44
  15  -1  -2    3.52    2.99
  15   1  -2    5.19    2.55
  15  -1   2    3.98    4.45
  15   1   2   11.31    4.71
  15  -1  -3   19.86    6.83
  15  -1   3   19.57    8.77
  15   1   3   16.09    6.81
  15  -1   4  162.36   36.01
  15   1   4  189.26   20.39
  15  -1   5   24.24    7.82
  15   1   5   31.41   10.65
  15  -1   6   33.86    9.56
  15   1   6   74.43    9.72
  15  -1   7  204.77   20.66
  15   1   7  229.23   25.07
  15  -1   8    4.37    3.52
  15   1   8    3.51    3.73
  15  -1   9    0.61    7.49
  15   1   9    5.37    4.73
  15  -1  10   13.12    4.59
  15   1  10   10.55    2.69
  15  -1  11    4.33    3.02
  15   1  11    6.88    3.57
  15  -1  12   49.49   13.16
  15   1  12   34.33   11.22
  15  -1  13    8.04    5.60
  15   1  13    9.00    6.14
  15  -1  14   38.01   16.62
  15  -1  15  113.31   18.53
  15   1  15  113.53   34.90
  15  -1  16    9.22    2.79
  15   1  16    3.28    5.17
  15  -1  17   17.52    6.20
  15   1  17    6.06    4.44
  15  -1  18   32.74    8.04
  15   1  18   25.74    7.08
  15  -1  19    5.24    4.47
  15   1  19    4.46    3.83
  15  -1  20    3.07    5.38
  15   1  20    4.62    3.19
  16  -1   0  286.02   19.43
  16  -1  -1    5.80    4.49
  16  -1   1    5.79    2.99
  16   1   1    6.37    3.46
  16  -1   2   33.12   11.30
  16   1   2   31.78   10.44
  16  -1   3   72.25   15.10
  16   1   3   53.20   14.74
  16  -1   4    3.86    2.98
  16   1   4    2.09    2.26
  16  -1   5   24.30   14.31
  16   1   5   20.47    8.28
  16  -1   6   -1.12    4.91
  16   1   6    5.70    3.25
  16  -1   7   17.39    6.27
  16   1   7   12.94    5.31
  16  -1   8   71.03   22.04
  16   1   8   63.32   17.34
  16  -1   9   13.53    4.81
  16   1   9   -0.49    3.09
  16  -1  10   54.27   21.19
  16   1  10   52.47   15.27
  16  -1  11  128.81   38.20
  16   1  11  129.98   31.55
  16  -1  12   24.17   10.35
  16  -1  13    3.69    3.37
  16   1  13   -2.86    5.10
  16  -1  14   18.77    6.45
  16   1  14   11.65    6.05
  16  -1  15    1.42    3.53
  16   1  15    3.93    2.95
  17  -1   3    8.57    4.66
  17  -1   4   62.19   22.68
  17  -1   5    9.05    6.87
  17   1   5    7.35    3.85
   0  -2   0 8652.22  108.02
   0   2   0 8381.58  104.77
   0  -2   0 8589.69  107.15
   0   2   0 8813.50  109.86
   0  -2  -1    2.46    2.03
   0   2   1   -2.26    2.40
   0  -2   1   12.19    4.45
   0   2  -1    1.93    2.14
   0  -2  -1    1.13    1.30
   0   2   1    3.70    2.95
   0  -2   1    8.21    3.76
   0   2  -1    3.07    2.31
   0  -2  -2    8.02    2.59
   0   2   2    7.22    1.81
   0  -2   2    9.61    2.43
   0   2  -2    6.43    1.65
   0   2   2    1.50    2.71
   0  -2   2   11.35    3.61
   0   2  -2    8.29    1.83
   0  -2  -3    2.12    1.37
   0   2   3   -1.06    3.14
   0  -2   3    2.22    1.69
   0   2  -3    0.41    1.29
   0  -2   3    0.42    1.77
   0   2  -3    1.78    2.92
   0   2   3    0.48    1.70
   0  -2  -3    5.03    2.19
   0  -2  -4  435.92    8.40
   0   2   4  442.86    8.78
   0  -2   4  427.61    7.66
   0   2  -4  417.78    8.58
   0  -2   4  472.23   11.39
   0   2  -4  460.87    8.18
   0   2   4  458.28    8.82
   0  -2  -4  456.47    8.04
   0  -2  -5    5.45    2.57
   0   2   5    4.16    4.11
   0  -2   5    7.55    3.06
   0   2  -5    4.12    3.34
   0  -2   5    6.66    3.48
   0   2  -5   -0.55    2.57
   0   2   5    4.88    2.27
   0  -2  -5   -0.11    1.18
   0   2   6 1983.37   27.32
   0  -2   6 2055.05   28.87
   0   2  -6 1999.50   26.26
   0   2  -6 2115.31   27.86
   0   2   6 2047.57   27.01
   0  -2  -6 2097.16   27.79
   0  -2  -7   -3.16    3.71
   0   2   7    0.55    1.22
   0  -2   7    2.62    2.80
   0   2  -7    9.04    4.05
   0  -2   7   10.13    4.83
   0   2  -7    0.80    1.87
   0   2   7    0.72    1.64
   0  -2  -7   -1.91    2.88
   0  -2  -8 2113.41   28.16
   0   2   8 2093.29   27.69
   0  -2   8 2132.55   27.93
   0   2  -8 2178.78   28.72
   0   2  -8 2227.91   29.53
   0   2   8 2307.89   31.09
   0  -2  -9    0.26    1.60
   0   2   9   -0.40    2.51
   0  -2   9   -0.03    2.66
   0   2  -9    0.61    1.88
   0  -2   9    1.85    1.40
   0   2  -9    0.44    3.52
   0   2   9   -4.58    3.28
   0  -2  -9   -0.23    2.60
   0  -2 -10  355.71    8.29
   0   2  10  311.87   12.36
   0  -2  10  359.53    8.26
   0   2 -10  335.25   13.04
   0  -2  10  360.98   10.16
   0   2 -10  347.28   13.91
   0   2  10  366.80    6.55
   0  -2 -10  382.62    8.05
   0  -2  11    1.16    1.43
   0  -2 -11    2.13    3.12
   0   2  11    1.03    2.38
   0  -2  11    3.92    2.42
   0  -2  11   -0.10    3.52
   0   2 -11   -0.68    3.12
   0   2  11    1.00    2.07
   0  -2 -11   -0.36    2.90
   0  -2  12   27.17    7.29
   0  -2 -12   30.46    6.74
   0   2  12   21.96    5.97
   0  -2  12   28.90    7.68
   0  -2  12   28.55    9.29
   0   2 -12   29.71    8.63
   0   2  12   33.08   10.78
   0  -2 -12   25.14    6.49
   0  -2  13    0.74    1.00
   0  -2 -13    1.41    1.38
   0   2  13   -1.99    2.79
   0  -2  13    5.70    3.04
   0  -2  13   -2.11    3.14
   0   2 -13    4.78    3.12
   0   2  13   -1.84    5.13
   0  -2 -13   -0.08    2.88
   0  -2  14 1085.33   30.25
   0   2  14 1076.23   30.03
   0  -2  14 1100.92   31.08
   0  -2  14 1102.97   32.58
   0   2  14 1101.34   31.45
   0  -2  15   -0.06    2.70
   0  -2 -15    5.41    3.86
   0   2  15    1.21    3.64
   0  -2  15    0.92    4.34
   0  -2  15    2.81    2.05
   0   2  15    2.84    4.30
   0  -2  16  427.08   13.03
   0  -2 -16  461.56   21.82
   0   2  16  385.12   28.65
   0  -2  16  448.90   14.19
   0  -2  16  441.01   18.02
   0   2  16  425.12   12.08
   0  -2  17    0.05    1.26
   0  -2  17    0.12    2.39
   0  -2  17    0.72    4.97
   0   2  17    1.83    4.04
   0  -2  18  630.44   22.07
   0  -2 -18  631.75   22.79
   0  -2  18  676.82   23.81
   0  -2  18  646.58   24.32
   0   2  18  628.34   24.01
   0  -2  19    0.69    1.32
   0  -2 -19    5.73    2.57
   0  -2  19   -0.30    3.68
   0  -2  19    5.94    3.26
   0   2  19    5.38    2.55
   0  -2 -20   50.91    9.97
   0  -2  20   56.40   12.86
   0  -2  20   51.17   10.82
   0   2  20   62.81   17.52
   0  -2 -21    6.39    3.57
   0  -2  21   -5.38    4.04
   0  -2 -22  918.74   28.07
   0  -2  22  984.53   29.12
   0  -2  22 1049.28   33.63
   0   2  22  933.11   31.07
   0  -2 -23    9.07    5.21
   0  -2  23   -3.59    7.29
   0   2  23    4.40    3.78
   0  -2 -24    9.19    4.14
   0  -2  24    1.15    1.85
   0  -2  24    8.62    6.96
   0   2  24    6.12    4.97
   0  -2 -25    1.64    3.90
   0  -2 -26  432.66   19.17
   0  -2  26  434.47   18.35
   0  -2  26  471.56   18.94
   0   2  26  481.99   28.07
   0  -2 -27    4.39    2.96
   0  -2  27   -1.97    3.76
   0  -2  27   -0.39    2.80
   0   2  27    3.19    3.87
   0  -2 -28    1.54    3.20
   0  -2  28    1.99    1.79
   0  -2  28    8.10    4.80
   0   2  28    5.56    4.03
   0  -2 -29   -1.64    4.35
   0  -2  29    5.54    2.71
   0  -2  29    8.87    4.90
   0   2  29    4.24    3.08
   0  -2 -30  743.83   38.53
   0  -2  30  834.55   14.74
   0  -2  30  825.12   43.50
   0  -2 -31    8.79    3.83
   0  -2  31    1.25    5.97
   0  -2  31    5.11    5.69
   0  -2 -32  353.73   32.45
   0  -2  32  352.47   19.36
   0  -2  32  348.46   28.84
   0   2  32  386.54   22.69
   0  -2 -33    5.12    3.53
   0  -2  33   -0.59    4.37
   0   2  33    4.11    2.51
   0  -2 -34   83.50   18.91
   0  -2  34   77.26   13.63
   0  -2  34  100.45   19.55
   0   2  34   99.76   14.84
   0  -2 -35    2.65    3.54
   0  -2  35    4.76    4.50
   0  -2 -36   12.69    5.01
   0  -2  36   12.06    4.86
   0  -2  36   21.14    9.21
   0  -2 -37   -0.72    3.85
   0  -2  37    3.72    3.23
   0  -2  37   -0.43    3.45
   0   2  37    7.69    3.48
   0  -2 -38  122.13   43.21
   0  -2  38  119.75   34.85
   0   2  38  140.76   48.03
   0  -2 -39    7.45    2.28
   0  -2  39   -1.96    8.42
   0   2  39    7.99    3.40
   0  -2  40  233.93   36.24
   0   2  40  234.55   26.99
   0  -2  41    5.64    4.08
   0   2  41    2.23    6.80
  -1  -2   0    7.81    1.97
   1   2   0    3.41    2.68
   1  -2   0    5.91    2.62
  -1   2   0   -1.09    2.54
  -1  -2   0    2.77    2.22
   1  -2   0    2.97    1.86
   1   2   0    3.70    1.87
  -1   2   0    3.60    1.63
  -1  -2  -1   17.86    5.01
   1   2   1   15.81    4.11
  -1  -2   1   22.15    3.74
   1   2  -1   17.19    3.98
   1  -2  -1   20.42    4.10
  -1   2   1   16.32    3.67
   1  -2   1   13.53    3.43
  -1   2  -1   14.67    2.44
   1  -2  -1   16.27    3.75
  -1  -2  -1   17.54    3.04
  -1   2   1   17.01    2.54
   1   2   1   22.96    5.34
  -1  -2   1   18.94    5.93
   1   2  -1   17.58    5.85
   1  -2   1   14.19    2.22
  -1   2  -1   17.19    3.86
  -1  -2  -2    5.11    2.73
   1   2   2    4.42    1.99
  -1  -2   2    9.95    2.08
   1  -2  -2    6.98    3.31
   1   2  -2    7.65    2.68
  -1   2   2    6.74    2.50
   1  -2   2    3.42    1.92
  -1   2  -2    6.95    1.71
  -1  -2  -2   11.32    3.76
  -1   2   2    8.05    1.56
   1   2   2   10.50    2.87
  -1  -2   2    3.17    2.68
   1   2  -2    4.93    1.96
   1  -2   2    1.32    2.55
  -1   2  -2    6.70    1.51
  -1   2   2    5.55    3.14
  -1  -2  -3  207.14    9.00
   1  -2  -3  205.59    8.94
  -1  -2   3  198.41    9.61
  -1   2   3  208.19    8.92
   1   2  -3  185.70    8.94
   1  -2   3  222.93    9.77
  -1   2  -3  196.87    8.17
   1   2   3  221.18   14.28
  -1  -2   3  201.08    8.77
   1   2  -3  200.24    8.98
   1  -2   3  217.89    8.82
  -1   2  -3  201.30    8.55
  -1   2   3  232.88    9.21
   1   2   3  211.55    9.24
   1  -2  -3  197.79    8.53
   1   2   4 3421.19   43.95
  -1   2   4 3502.15   44.80
  -1  -2   4 3679.61   47.00
   1   2  -4 3658.28   46.22
   1  -2   4 3616.51   47.37
  -1   2  -4 3547.86   45.30
  -1  -2   4 3853.98   49.23
   1  -2  -4 3884.48   49.19
  -1  -2  -4 3798.96   48.44
  -1  -2  -5   85.47    5.70
   1   2   5   85.82    5.24
   1  -2  -5  127.15   13.50
  -1   2   5  103.20    7.12
  -1  -2   5  106.82    8.59
   1   2  -5   99.66    5.38
   1  -2   5  106.01    8.03
  -1   2  -5  106.48   10.90
  -1  -2   5  118.29   11.48
   1   2  -5   83.97    9.61
   1  -2   5  129.99   13.69
  -1   2  -5  111.50    8.42
  -1   2   5  111.24    5.94
   1  -2  -5  102.96    5.77
   1   2   5  123.10    6.29
  -1  -2  -5  114.42    7.99
  -1  -2  -6  124.29    5.87
   1   2   6  150.34    6.85
   1  -2  -6  141.92   10.64
  -1   2   6  139.98    6.22
  -1  -2   6  143.80    8.22
   1   2  -6  144.77    8.87
   1  -2   6  146.46    7.24
  -1   2  -6  138.38    6.41
  -1  -2   6  151.41    8.29
   1  -2   6  132.36    6.76
  -1   2  -6  144.25    6.31
  -1   2   6  150.07    9.54
   1   2   6  161.32    8.02
   1  -2  -6  156.61    6.80
  -1  -2  -6  146.16    6.76
  -1  -2  -7    4.91    2.19
   1   2   7    2.31    1.93
   1  -2  -7    1.14    2.13
  -1   2   7    3.74    2.41
  -1  -2   7    2.82    1.44
   1   2  -7    3.82    1.48
   1  -2   7    3.75    1.98
  -1   2  -7    2.17    2.63
  -1  -2   7    0.60    2.65
   1   2  -7    2.60    2.64
   1  -2   7    3.93    2.66
  -1   2  -7    2.05    1.80
  -1   2   7    3.45    2.73
   1   2   7    7.01    2.97
   1  -2  -7    5.91    3.14
  -1  -2  -7    2.09    1.69
  -1  -2  -8    3.85    1.92
   1   2   8    6.16    1.79
   1  -2  -8    2.29    2.18
  -1   2   8    3.98    1.82
  -1  -2   8   -0.10    2.16
   1  -2   8   -2.37    3.25
   1   2  -8   -1.16    1.69
  -1   2  -8   -0.04    3.29
  -1  -2   8   -1.33    1.95
   1   2  -8   -0.41    3.33
   1  -2   8   -0.01    3.67
  -1   2  -8    1.43    2.70
  -1   2   8   -0.87    2.28
   1  -2  -8   -1.52    2.75
   1   2   8   -1.39    3.48
  -1  -2  -8   -0.06    3.00
  -1  -2  -9  170.63    8.09
   1   2   9  164.85    8.46
   1  -2  -9  190.04    8.52
  -1   2   9  191.02   10.01
  -1  -2   9  179.45    8.90
   1  -2   9  181.97    8.65
   1   2  -9  183.64    7.40
  -1   2  -9  178.51    8.40
  -1  -2   9  179.61    8.24
   1  -2   9  183.05    8.48
   1   2  -9  189.86    8.39
  -1   2  -9  175.04    9.85
  -1   2   9  174.49    7.83
   1   2   9  198.55    9.04
   1  -2  -9  180.48    8.04
  -1  -2  -9  176.22    8.04
   1  -2 -10  672.66   11.74
  -1   2  10  650.78   13.12
  -1  -2  10  679.92   10.69
   1  -2  10  629.05   11.53
  -1  -2  10  664.98   11.29
   1  -2  10  632.37   11.54
   1   2 -10  673.84   12.16
  -1   2 -10  604.95   12.04
  -1   2  10  626.03   11.05
   1   2  10  701.24   12.29
   1  -2 -10  612.16   10.70
  -1  -2 -10  693.57   11.41
   1  -2  11   44.65    3.82
  -1  -2  11   42.50    4.89
  -1  -2 -11   57.12   14.48
   1  -2 -11   57.05   13.29
   1   2  11   42.82   12.56
  -1   2  11   38.36    6.97
  -1  -2  11   49.71    8.11
   1  -2  11   49.02    7.64
  -1  -2  11   51.70   11.60
   1  -2  11   51.97   12.47
   1   2 -11   41.70   10.87
  -1   2 -11   43.19    3.85
  -1   2  11   52.69   13.29
   1   2  11   43.13    4.04
   1  -2 -11   38.94    8.06
  -1  -2 -11   50.40   10.40
  -1  -2  12 2211.35   60.24
   1  -2  12 2196.46   59.52
  -1  -2 -12 1947.66   54.17
  -1   2  12 2101.71   57.22
  -1  -2  12 2232.63   60.33
   1  -2  12 2157.68   60.16
   1  -2  12 2045.51   55.87
   1   2 -12 2297.24   62.44
  -1   2 -12 1919.10   52.61
  -1   2  12 2018.13   56.07
   1   2  12 2388.83   66.64
   1  -2 -12 2085.11   56.66
  -1  -2 -12 2241.22   63.01
   1  -2  13  107.22    8.30
  -1  -2  13  118.06    8.44
   1  -2 -13  115.45    7.69
  -1   2  13  127.83   13.91
  -1  -2  13  113.58    8.24
   1  -2  13  116.70   14.17
  -1  -2  13  103.02   13.81
   1  -2  13  125.02   29.80
  -1   2 -13  113.54    8.20
  -1   2  13  115.28    8.97
   1   2  13  116.89    9.66
   1  -2 -13  107.95   12.05
  -1  -2  14  741.33   21.60
   1  -2 -14  767.47   24.20
  -1  -2  14  827.78   23.49
   1  -2  14  743.70   23.17
   1  -2  14  757.17   23.51
  -1   2  14  774.48   24.49
   1   2  14  887.19   26.93
   1  -2  15    4.14    2.24
  -1  -2  15    4.58    2.25
  -1  -2 -15   -0.56    3.56
   1  -2 -15    4.85    3.53
  -1   2  15    3.50    2.55
  -1  -2  15    4.52    2.55
   1  -2  15   -0.28    4.02
  -1  -2  15    6.87    2.76
   1  -2  15    4.19    4.05
  -1   2  15    3.15    3.58
   1   2  15    4.22    2.93
   1  -2  16   65.71    5.49
  -1  -2  16   63.69    6.60
  -1  -2 -16   61.72    4.74
   1  -2 -16   70.83   12.89
  -1   2  16   56.53   10.74
  -1  -2  16   69.44   10.11
   1  -2  16   63.56   16.05
  -1  -2  16   76.28   16.44
   1  -2  16   59.69   14.27
  -1   2  16   64.26   17.32
   1   2  16   51.78    5.47
   1  -2  17    5.05    2.67
  -1  -2  17    5.01    2.17
  -1  -2 -17    7.74    3.88
   1  -2 -17   10.08    2.56
  -1   2  17    2.52    1.44
  -1  -2  17    4.27    3.37
   1  -2  17    2.49    2.84
  -1  -2  17   27.52    9.99
  -1   2  17    2.15    2.18
   1   2  17   -2.24    5.53
  -1  -2  18 1269.20   44.15
  -1  -2 -18 1123.60   42.28
   1  -2 -18 1235.83   41.93
  -1  -2  18 1220.52   41.22
   1  -2  18 1256.98   42.64
  -1  -2  18 1256.39   43.14
  -1   2  18 1201.91   43.93
   1   2  18 1287.74   44.45
  -1  -2 -19    8.58    5.23
  -1  -2  19    6.95    2.44
   1  -2 -19   10.55    3.66
   1  -2  19    7.27    5.70
  -1  -2  19    5.06    3.12
  -1  -2  19   13.47    9.75
   1   2  19   11.81    4.64
  -1  -2 -20  142.49   11.68
   1  -2 -20  148.23   10.47
  -1  -2  20  142.32   10.61
  -1  -2  20  149.07    9.78
   1  -2  20  136.81   22.39
  -1  -2  20  158.54   10.25
   1  -2  20  153.24   11.89
  -1   2  20  167.73   19.76
   1   2  20  174.71   20.21
  -1  -2 -21   56.69   12.56
  -1  -2  21   47.15    5.63
   1  -2 -21   52.59    9.58
  -1  -2  21   32.22    7.46
   1  -2  21   53.73   13.71
  -1   2  21   58.43   12.89
   1   2  21   53.02   18.47
  -1  -2 -22  547.81   18.37
   1  -2 -22  494.76   16.47
  -1  -2  22  516.40   15.84
  -1  -2  22  505.87   16.76
   1  -2  22  500.83   17.37
   1  -2  22  513.54   23.31
  -1   2  22  514.09   17.98
   1   2  22  542.52   27.07
  -1  -2 -23   32.21    7.59
   1  -2 -23   26.46    5.56
  -1  -2  23   27.98    8.45
   1  -2  23   38.12   10.70
  -1  -2  23   32.46   14.82
   1  -2  23   37.54    9.20
  -1   2  23   30.98    6.42
   1   2  23   38.60    8.93
  -1  -2 -24    8.63    5.10
   1  -2 -24   -0.36    3.25
   1  -2  24   -3.78    4.27
  -1  -2  24   -0.74    3.13
  -1  -2  24   -0.43    6.51
   1  -2  24   -0.83    5.75
  -1   2  24   -2.57    4.97
   1   2  24   -3.12    6.81
  -1  -2 -25   70.90   18.01
   1  -2 -25   72.04   14.11
  -1  -2  25   66.55   11.10
  -1  -2  25   66.80    8.77
   1  -2  25   93.85   18.77
  -1   2  25   76.41   18.81
   1   2  25   95.13   29.99
  -1  -2 -26  695.48   24.64
   1  -2 -26  643.43   27.42
  -1  -2  26  631.00   21.50
  -1  -2  26  669.32   23.19
  -1   2  26  746.30   25.85
   1   2  26  676.94   24.47
  -1  -2 -27   44.56   13.48
  -1  -2  27   36.78    8.84
   1  -2  27   53.92    9.64
  -1  -2  27   64.25   14.71
   1  -2  27   57.14   14.62
  -1   2  27   52.67    8.55
   1   2  27   50.72   12.14
  -1  -2 -28   29.19    9.16
   1  -2 -28   34.12    7.54
  -1  -2  28   27.40    6.59
   1  -2  28   24.07   10.95
  -1  -2  28   32.72    7.73
   1  -2  28   30.09   10.03
  -1   2  28   26.95    8.77
   1   2  28   36.35   10.16
  -1  -2 -29    7.18    3.91
   1  -2 -29    5.44    3.01
  -1  -2  29    7.65    4.20
   1  -2  29    7.66    5.33
  -1  -2  29    9.04    5.43
   1  -2  29   12.60    5.48
  -1   2  29   15.53    6.96
   1   2  29    6.57    4.43
  -1  -2 -30  390.50   30.70
   1  -2 -30  392.27   23.88
  -1  -2  30  372.30   20.08
   1  -2  30  358.33   21.37
  -1  -2  30  360.41   21.67
   1  -2  30  403.53   24.09
  -1   2  30  384.10   21.97
   1   2  30  397.32   26.17
  -1  -2 -31    4.16    4.16
   1  -2 -31    3.31    3.02
  -1  -2  31    4.27    2.06
   1  -2  31    8.98    5.96
  -1  -2  31    4.03    6.19
  -1   2  31    3.00    2.85
   1   2  31    5.22    4.75
   1  -2 -32    4.54    3.07
  -1  -2 -32    5.17    4.03
  -1  -2  32    3.85    2.07
   1  -2  32    6.87    3.61
  -1  -2  32   10.64    9.10
   1  -2  32   18.50    6.45
  -1   2  32   14.63    6.27
   1   2  32    9.76    5.73
   1  -2 -33    9.07    4.83
   1  -2  33    4.76    3.48
  -1  -2  33    9.07    6.31
   1  -2  33   -4.92    8.17
   1   2  33    3.22    3.82
  -1  -2 -34  443.99   33.77
   1  -2 -34  459.73   26.46
  -1  -2  34  458.74   24.26
   1  -2  34  467.37   24.57
  -1  -2  34  463.78   37.89
   1  -2  34  511.71   27.68
  -1   2  34  510.91   29.23
   1   2  34  476.28   38.86
  -1  -2 -35   14.70    5.40
   1  -2 -35   16.82    8.94
   1  -2  35   10.87    6.50
  -1  -2  35    7.02    4.69
  -1  -2  35   45.09   12.24
   1  -2  35   16.17    9.44
  -1   2  35   33.11    6.68
   1   2  35   11.77    9.43
   1  -2 -36  317.13   15.34
  -1  -2 -36  310.01   32.71
   1  -2  36  330.30   24.75
  -1  -2  36  375.18   22.35
   1  -2  36  377.11   43.38
  -1   2  36  371.91   18.98
   1   2  36  384.32   23.42
  -1  -2 -37    6.28    4.05
  -1  -2  37    6.92    4.21
   1  -2  37    4.46    4.85
  -1   2  37    5.81    4.46
   1  -2 -38   15.89    4.23
  -1  -2 -38   25.96    7.41
   1  -2  38   13.75    6.58
  -1  -2  38   28.84   12.67
   1  -2  38   26.39   10.40
  -1   2  38   25.71   10.94
   1   2  38   23.18    7.11
  -1  -2 -39    2.31    1.61
   1  -2  39    2.48    3.79
  -1  -2  39    9.55    5.58
   1  -2  39    7.44    8.86
  -1   2  39    5.00    6.58
   1   2  39   12.11    6.17
  -1  -2 -40    6.51    3.80
   1  -2  40   20.85    8.13
  -1  -2  40   18.10    7.48
  -1   2  40   17.99    8.67
   1   2  40    5.34    4.23
  -1  -2 -41    3.35    2.02
  -1  -2  41   10.41    7.38
   1  -2  41    3.28    4.35
  -1   2  41    8.54    3.95
   1   2  41   -2.02    7.74
  -2  -2   0 1661.27   22.65
   2   2   0 1720.58   22.96
   2  -2   0 1840.15   24.82
  -2   2   0 1800.94   24.03
  -2  -2   0 1976.14   27.79
   2  -2   0 1860.87   23.73
   2   2   0 1921.15   27.16
  -2   2   0 1874.80   23.79
  -2  -2  -1  755.47   12.54
  -2  -2   1  783.68   12.54
   2   2   1  796.56   11.89
   2   2  -1  796.24   15.57
   2  -2  -1  866.78   14.78
  -2   2   1  843.77   15.54
   2  -2   1  892.82   14.59
  -2   2  -1  829.59   15.31
  -2  -2  -1  911.32   13.91
   2   2   1  896.28   14.09
  -2   2   1  895.61   11.68
  -2  -2   1  917.63   14.83
   2   2  -1  850.83   13.38
   2  -2   1  886.53   12.47
  -2   2  -1  859.86   12.14
  -2   2   1  917.51   12.72
  -2  -2  -2    6.42    1.96
   2   2   2    0.21    2.21
  -2  -2   2    5.04    1.52
   2   2  -2    2.49    1.30
   2  -2  -2    1.13    2.16
  -2   2   2    4.10    2.88
   2  -2   2    2.62    1.61
  -2   2  -2    3.65    2.73
  -2  -2  -2    4.97    2.41
  -2   2   2    5.61    1.61
   2   2   2    8.93    5.84
  -2  -2   2    2.97    2.41
   2   2  -2    6.07    4.23
   2  -2   2    2.39    1.45
  -2   2  -2    2.06    1.03
  -2   2   2    2.24    0.98
  -2  -2  -3   13.61    4.73
   2   2   3   13.73    3.66
  -2  -2   3   22.18    4.51
   2   2  -3   20.76    4.73
   2  -2  -3   19.64    3.54
  -2   2   3   13.92    4.47
   2  -2   3   17.36    4.29
  -2   2  -3   22.24    4.60
   2   2   3   21.51    4.55
  -2  -2   3   22.88    5.55
   2   2  -3   24.20    5.29
   2  -2   3   23.56    4.88
  -2   2  -3   17.23    4.14
  -2   2   3   24.18    4.14
   2  -2  -3   22.48    5.11
   2   2   3   22.85    4.68
  -2  -2  -4   37.30    8.52
   2   2   4   31.50    3.38
  -2  -2   4   35.93    3.30
   2  -2  -4   53.91   10.25
   2   2  -4   38.88    5.15
  -2   2   4   41.46    6.93
   2  -2   4   45.89   11.48
  -2   2  -4   37.04    9.91
   2   2   4   34.01    9.93
  -2  -2   4   47.55   11.02
   2   2  -4   34.60    9.27
   2  -2   4   35.40    3.88
  -2   2  -4   31.56    3.22
  -2   2   4   35.17    5.67
   2  -2  -4   38.65    9.00
   2   2   4   39.29    9.49
  -2  -2  -5   22.02    4.42
   2   2   5   23.05    5.49
  -2  -2   5   33.06    6.37
   2  -2  -5   37.84    8.92
  -2   2   5   30.86    6.40
   2   2  -5   31.15    5.15
   2  -2   5   35.12    8.16
  -2   2  -5   32.50    6.17
  -2  -2   5   26.94    5.95
   2   2  -5   27.66    7.35
   2  -2   5   31.79    7.96
  -2   2  -5   24.55    5.03
  -2   2   5   30.95    5.83
   2  -2  -5   33.72    7.19
   2   2   5   36.26    6.89
  -2  -2  -5   27.85    4.45
  -2  -2  -6   77.92    5.41
   2   2   6   84.35    5.05
   2  -2  -6   91.51    6.60
  -2  -2   6   92.46    6.07
  -2   2   6  100.35    5.21
   2   2  -6   89.09    4.75
   2  -2   6   92.03    5.53
  -2   2  -6   88.01    6.91
  -2  -2   6   86.15    6.39
   2   2  -6   93.05    5.65
   2  -2   6   91.35    8.84
  -2   2  -6   80.93    4.03
  -2   2   6   85.58    4.46
   2  -2  -6   97.03    5.21
   2   2   6  103.92    5.87
  -2  -2  -6  107.57    5.70
  -2  -2  -7  208.28    9.19
   2  -2  -7  252.19   14.50
  -2   2   7  239.25    9.75
  -2  -2   7  239.90    9.71
   2   2  -7  263.90   10.27
   2  -2   7  264.87   12.60
  -2   2  -7  247.06   10.07
  -2  -2   7  275.11   13.83
   2   2  -7  257.96   11.51
   2  -2   7  231.68   11.17
  -2   2  -7  222.72   10.69
  -2   2   7  213.93    9.77
   2  -2  -7  247.27    9.88
   2   2   7  264.96   13.04
  -2  -2  -7  262.92   10.83
  -2  -2  -8 1660.35   23.91
   2  -2  -8 1905.84   26.48
  -2   2   8 1874.11   24.95
  -2  -2   8 1935.35   24.98
   2  -2   8 1750.27   24.76
   2   2  -8 1887.92   24.42
  -2  -2   8 1939.23   26.94
   2   2  -8 1940.91   26.34
   2  -2   8 1730.38   23.78
  -2   2  -8 1553.52   21.24
  -2   2   8 1615.83   22.57
   2  -2  -8 1729.31   25.48
   2   2   8 2062.13   28.16
  -2  -2  -8 2150.74   28.89
   2  -2  -9  967.29   15.11
  -2   2   9  917.83   13.82
  -2  -2   9  941.33   13.05
   2  -2   9  903.77   14.54
   2   2  -9  923.23   12.39
  -2   2  -9  893.62   13.53
  -2  -2   9  994.53   16.44
   2   2  -9  968.02   15.51
   2  -2   9  812.33   13.12
  -2   2  -9  792.16   16.60
   2  -2  -9  836.05   15.02
   2   2   9  998.29   19.78
  -2  -2  -9  996.24   16.10
   2  -2  10   82.87    8.71
  -2  -2 -10   60.96   13.56
   2   2  10   61.63   15.16
   2  -2 -10   71.57    4.64
  -2   2  10   74.72    5.22
  -2  -2  10   78.26    5.95
   2  -2  10   81.54   20.34
  -2  -2  10   84.67   18.55
   2   2 -10   79.94    7.05
   2  -2  10   61.55    5.96
  -2   2 -10   56.73    5.53
  -2   2  10   55.57    7.89
   2  -2 -10   61.54    9.34
   2   2  10   68.29    8.02
  -2  -2 -10   84.39    8.98
   2  -2  11   73.57    6.28
  -2  -2  11   93.96    5.61
  -2  -2 -11   79.39   11.78
   2   2  11   76.47    7.87
   2  -2 -11   83.05    5.85
  -2   2  11   88.18    5.76
  -2  -2  11  101.10    7.59
   2  -2  11   90.50    8.44
  -2  -2  11  119.47   13.08
   2   2 -11   98.01    6.59
   2  -2  11   80.11    6.34
  -2   2 -11   85.72    7.66
  -2   2  11   65.07    6.44
   2   2  11  108.02   12.50
   2  -2 -11   80.19    5.32
  -2  -2 -11  101.33   12.54
   2  -2  12    3.83    1.86
  -2  -2  12    2.12    1.51
  -2  -2 -12    3.30    2.72
   2   2  12    4.71    4.98
   2  -2 -12    4.80    1.87
  -2   2  12    1.93    1.66
  -2  -2  12    1.93    1.23
   2  -2  12    4.08    3.25
  -2  -2  12    7.29    4.30
   2   2 -12   -1.85    3.21
   2  -2  12    1.08    3.29
  -2   2  12    7.01    3.23
  -2   2 -12    4.14    2.43
   2  -2 -12   -0.08    2.66
   2   2  12    5.84    7.19
   2  -2  13  172.88   10.19
  -2  -2  13  150.03    9.13
  -2  -2 -13  152.02   15.68
   2  -2 -13  168.87   10.13
  -2   2  13  170.15   15.33
  -2  -2  13  171.96   10.81
   2  -2  13  158.38   10.12
  -2  -2  13  181.37   12.94
   2  -2  13  145.39    9.85
  -2   2  13  142.18    9.14
   2   2  13  197.36   17.95
   2  -2 -13  141.46    8.26
  -2  -2  14  697.65   19.62
  -2  -2 -14  667.26   26.20
   2  -2 -14  687.51   21.16
  -2   2  14  802.09   25.69
  -2  -2  14  765.15   22.35
   2  -2  14  739.87   23.82
  -2  -2  14  821.66   24.87
   2  -2  14  644.80   19.75
   2   2  14  814.46   24.82
  -2  -2  15   37.60    4.40
  -2  -2 -15   51.73   10.87
   2  -2 -15   50.27   12.37
  -2   2  15   40.79    7.93
  -2  -2  15   50.76    7.98
   2  -2  15   51.00   12.87
  -2  -2  15   62.91   14.99
   2  -2  15   39.48   11.60
  -2   2  15   34.89    7.59
   2   2  15   55.74   17.67
  -2  -2 -16  660.35   20.24
  -2  -2  16  708.46   19.99
   2  -2 -16  775.09   25.53
  -2   2  16  766.13   21.95
  -2  -2  16  823.06   23.91
   2  -2  16  736.42   25.34
  -2  -2  16  822.95   33.12
   2  -2  16  659.71   21.21
  -2   2  16  745.04   24.26
   2   2  16  839.26   28.24
  -2  -2 -17  272.74   13.78
  -2  -2  17  288.67   14.80
   2  -2 -17  326.06   14.78
  -2   2  17  301.73   13.33
  -2  -2  17  302.68   13.40
   2  -2  17  310.04   15.08
  -2  -2  17  328.69   16.74
   2  -2  17  286.51   23.01
   2   2  17  349.75   17.36
  -2  -2 -18  473.64   25.19
  -2   2  18  455.57   20.74
  -2  -2  18  476.91   21.34
   2  -2  18  445.55   20.65
  -2  -2  18  508.95   19.69
   2  -2  18  471.66   97.33
  -2   2  18  460.66   18.11
   2   2  18  471.56   22.74
  -2  -2 -19    5.95    3.43
   2  -2 -19    2.59    2.35
  -2  -2  19    1.74    0.75
  -2   2  19   -0.13    1.19
  -2  -2  19    1.92    0.80
   2  -2  19    0.57    1.79
  -2  -2  19    3.57    4.35
   2  -2  19   -2.00    3.70
  -2   2  19    6.16    2.77
   2   2  19    6.37    2.72
  -2  -2 -20    3.55    4.28
   2  -2 -20    4.09    2.11
  -2  -2  20    2.26    2.07
  -2  -2  20    1.11    2.70
   2  -2  20    5.69    2.52
  -2  -2  20    5.34    4.13
  -2   2  20    1.81    2.21
   2   2  20   -2.46    4.64
  -2  -2 -21  103.72    8.97
   2  -2 -21  111.02   16.63
  -2  -2  21   97.56    7.01
  -2  -2  21  108.89   11.16
   2   2  21   97.39   24.35
  -2  -2 -22  982.03   38.82
   2  -2 -22  977.88   38.31
  -2  -2  22 1035.85   39.58
  -2  -2  22 1003.41   39.11
   2  -2  22  966.93   39.89
  -2  -2  22 1038.08   44.85
   2   2  22  947.90   39.11
  -2  -2 -23  100.01   21.46
  -2  -2  23   53.57   13.80
   2  -2  23   87.21   19.51
  -2  -2  23   98.57   14.27
   2  -2  23  103.54    9.54
  -2   2  23   98.89   17.22
  -2  -2 -24    5.41    2.13
   2  -2 -24    9.02    2.90
  -2  -2  24    3.38    3.20
  -2  -2  24    3.36    2.34
   2  -2  24    3.79    3.58
  -2  -2  24    8.05    6.89
   2  -2  24    8.03    5.67
  -2   2  24    4.74    2.65
   2   2  24    4.05    4.22
  -2  -2 -25   54.23   14.92
   2  -2 -25   65.42    7.72
  -2  -2  25   41.96    6.79
  -2  -2  25   50.24   12.30
   2  -2  25   58.02   14.36
  -2  -2  25   65.88   12.89
   2  -2  25   55.35   13.02
  -2   2  25   64.10   14.84
   2   2  25   70.04   13.57
  -2  -2 -26  302.58   30.50
   2  -2 -26  276.15   17.74
  -2  -2  26  291.19   10.94
   2  -2  26  260.39   21.98
  -2  -2  26  275.81   12.64
   2  -2  26  295.31   21.73
  -2   2  26  312.91   24.45
   2   2  26  306.43   13.97
  -2  -2 -27   31.11    9.03
   2  -2 -27   23.54    6.22
  -2  -2  27   11.01    5.37
   2  -2  27   17.10    7.07
  -2  -2  27   16.45    8.91
   2  -2  27   30.61    9.06
  -2   2  27   16.41    8.26
   2   2  27   25.89   11.64
  -2  -2 -28    2.62    4.72
   2  -2 -28    0.95    1.84
  -2  -2  28    9.83    4.68
   2  -2  28    9.02    5.05
  -2  -2  28   -3.13    6.12
   2  -2  28    5.75    5.03
  -2   2  28    7.88    4.62
   2   2  28    3.25    3.43
  -2  -2 -29   46.27   10.13
   2  -2  29   19.32    7.57
  -2  -2  29   42.66   11.43
   2  -2  29   30.60   11.80
  -2   2  29   51.96   11.94
   2   2  29   50.04   13.38
  -2  -2 -30  723.12   30.87
   2  -2 -30  682.63   13.62
   2  -2  30  677.14   24.63
  -2  -2  30  675.48   36.15
   2  -2  30  678.20   37.88
  -2   2  30  714.48   37.97
   2   2  30  689.03   37.11
   2  -2 -31   73.82   19.09
  -2  -2  31   63.31   15.31
   2  -2  31   70.51   17.55
  -2  -2  31   87.24   24.98
   2  -2  31  115.84   22.36
  -2   2  31  104.74   22.92
   2   2  31   95.24   28.65
  -2  -2 -32  235.19   33.81
   2  -2 -32  215.26   14.98
  -2  -2  32  222.93   12.24
   2  -2  32  237.10   15.96
  -2  -2  32  209.05   23.10
   2  -2  32  225.30   29.86
  -2   2  32  235.54   15.26
   2   2  32  251.87   22.98
   2  -2 -33   19.51    5.37
  -2  -2 -33   23.95    9.63
  -2  -2  33    7.20    3.84
   2  -2  33   10.92    4.88
   2  -2  33    9.24    6.12
  -2   2  33   15.89    4.73
   2   2  33   12.38    6.28
  -2  -2 -34   78.52   21.20
   2  -2 -34   60.29   12.74
   2  -2  34   81.01   17.09
  -2  -2  34   73.57   20.42
   2  -2  34   74.32   19.22
  -2   2  34   75.21   16.16
   2   2  34   64.53   19.07
  -2  -2 -35   13.09    4.36
   2  -2 -35    1.13    3.67
   2  -2  35    7.53    3.46
  -2  -2  35   13.64    6.29
   2  -2  35    9.16    6.42
   2   2  35   11.18    9.63
  -2  -2 -36   25.54    5.84
   2  -2 -36   19.97    3.39
   2  -2  36   22.93    9.17
  -2  -2  36   24.04    8.51
   2  -2  36    6.59    4.73
  -2   2  36   22.15    6.35
   2   2  36   29.27    8.63
  -2  -2 -37   -5.53    4.66
   2  -2  37   -4.68    4.81
  -2  -2  37   -5.88    6.75
   2  -2  37    0.76    4.98
  -2   2  37   -5.96    5.84
   2   2  37   -1.46    7.61
  -2  -2 -38   82.89   20.85
   2  -2  38   74.31   22.99
  -2  -2  38   87.48   31.78
   2  -2  38  101.88   15.35
  -2   2  38   87.45   19.39
   2   2  38   84.20   28.77
   2  -2  39   62.93   18.42
  -2  -2  39   57.73   18.64
   2  -2  39   63.06   16.54
  -2   2  39   79.03   23.30
   2   2  39   61.86   21.82
  -2  -2 -40  245.76   23.27
   2  -2  40  241.07   20.07
  -2  -2  40  219.51   43.67
   2  -2  40  239.19   24.49
  -2   2  40  269.87   16.88
   2   2  40  237.53   40.63
  -2  -2 -41    6.04    3.71
   2  -2  41   10.50    3.77
  -2  -2  41   12.27    9.77
   2  -2  41   10.01    5.55
  -2   2  41    7.60    4.47
   2   2  41   21.40   14.35
  -3  -2   0    2.10    1.28
   3   2   0   -1.09    2.14
   3  -2   0   -2.20    3.71
  -3   2   0    1.03    1.07
  -3  -2   0   -0.11    3.12
   3   2   0    0.98    1.73
  -3  -2  -1   97.64    5.18
  -3  -2   1   94.07    6.16
   3   2   1  105.38    5.05
   3   2  -1  102.77    4.99
   3  -2  -1  119.54    6.97
   3  -2   1  105.01    5.89
  -3   2   1  118.44    6.96
  -3   2  -1  117.78    7.04
  -3  -2  -1  122.78    6.60
  -3  -2   1  127.08    6.33
   3   2   1  118.73    5.79
   3   2  -1  108.03    5.52
   3  -2   1  119.40    4.93
  -3   2  -1   77.73    3.56
  -3  -2  -2   36.25    9.42
  -3  -2   2   35.22    2.99
   3   2   2   36.42    4.04
   3   2  -2   35.29    5.42
   3  -2  -2   46.89   11.89
  -3   2   2   36.89    3.05
   3  -2   2   44.20   10.94
  -3   2  -2   44.40    3.98
  -3  -2  -2   45.62   11.73
   3   2   2   47.35   10.75
  -3  -2   2   49.95   11.60
   3   2  -2   42.00    3.06
   3  -2   2   40.23    4.25
  -3  -2  -3 1095.05   17.81
   3   2   3 1171.07   18.62
  -3  -2   3 1126.74   15.24
   3   2  -3 1296.98   18.13
   3  -2  -3 1396.22   19.70
  -3   2   3 1312.64   18.13
   3  -2   3 1382.50   20.44
  -3   2  -3 1334.54   20.90
   3   2   3 1444.83   20.12
  -3  -2   3 1473.70   21.59
   3   2  -3 1441.71   19.93
  -3   2   3  960.53   12.47
  -3   2  -3  917.12   12.16
   3   2   3 1478.46   20.58
  -3  -2  -4 1508.70   21.03
  -3  -2   4 1585.85   21.13
   3   2   4 1590.22   21.85
   3   2  -4 1919.25   24.51
   3  -2  -4 1902.98   25.68
  -3   2   4 1889.66   25.09
   3  -2   4 1773.82   24.92
  -3   2  -4 1790.50   24.79
   3   2   4 1982.94   26.46
  -3  -2   4 2053.12   27.40
   3   2  -4 2017.43   27.55
   3  -2   4 1726.12   22.80
   3  -2  -4 1888.07   24.12
   3   2   4 2051.88   27.76
  -3  -2  -5  714.17   13.50
   3   2   5  731.99   15.10
  -3  -2   5  740.38   10.50
   3   2  -5  880.75   11.63
   3  -2  -5  912.62   15.80
  -3   2   5  846.78   13.15
   3  -2   5  857.50   13.57
  -3   2  -5  814.64   17.03
  -3  -2   5  962.11   16.57
   3   2  -5  944.04   14.56
   3  -2   5  780.27   12.45
  -3   2   5  629.63   11.92
  -3   2  -5  627.86   14.96
   3  -2  -5  853.66   12.40
   3   2   5  996.52   15.06
  -3  -2  -6    7.06    2.21
   3   2   6    6.46    2.38
  -3  -2   6    9.12    1.90
   3  -2  -6   10.63    2.71
   3   2  -6   10.02    1.75
  -3   2   6   11.31    2.34
   3  -2   6    7.38    4.29
  -3   2  -6   11.03    2.77
  -3  -2   6    6.71    3.47
   3   2  -6    7.91    2.70
   3  -2   6    9.84    1.87
  -3   2   6    5.27    2.09
  -3   2  -6    3.83    2.73
   3  -2  -6   10.12    1.93
   3   2   6    8.98    2.84
  -3  -2  -6    8.78    2.11
  -3  -2  -7   68.63    5.91
   3   2   7   72.37    9.75
  -3  -2   7   83.81    3.96
   3  -2  -7   83.71    4.93
  -3   2   7  101.10    7.78
   3   2  -7   86.69    4.88
   3  -2   7   94.08    7.56
  -3   2  -7   81.02    5.30
  -3  -2   7  102.84   10.28
   3   2  -7   89.74    8.47
   3  -2   7   83.12    8.06
  -3   2   7   67.72    9.60
  -3   2  -7   59.01    6.31
   3  -2  -7   73.52    4.45
   3   2   7   97.56    7.96
  -3  -2  -7  101.58    8.73
  -3  -2  -8    1.78    2.03
   3   2   8   -1.08    3.34
  -3  -2   8    1.71    0.91
   3  -2  -8   -1.57    2.33
  -3   2   8    1.48    2.19
   3   2  -8    0.59    0.75
   3  -2   8    2.41    2.43
  -3   2  -8    2.48    2.28
  -3  -2   8   -1.24    4.20
   3   2  -8    2.97    1.76
   3  -2   8    0.14    1.60
  -3   2   8   -0.57    2.26
  -3   2  -8    0.90    1.53
   3  -2  -8   -0.94    1.79
   3   2   8    3.25    2.23
  -3  -2  -8    1.69    2.51
   3  -2   9  222.80   12.16
  -3  -2  -9  195.13   11.23
   3   2   9  199.72   11.38
  -3  -2   9  224.05   11.37
   3  -2  -9  238.69   14.27
  -3   2   9  236.36   12.52
   3  -2   9  239.58   13.15
   3   2  -9  231.70   11.56
  -3  -2   9  262.31   19.65
   3   2  -9  256.09   14.06
   3  -2   9  195.44   10.50
  -3   2   9  195.24   15.48
  -3   2  -9  180.56   10.49
   3  -2  -9  189.50   11.27
   3   2   9  258.36   13.85
  -3  -2  -9  252.98   13.58
   3  -2  10  179.72   10.13
  -3  -2  10  185.98    9.37
  -3  -2 -10  159.21    9.83
   3   2  10  160.20   12.83
   3  -2 -10  195.49   11.03
  -3  -2  10  194.35    9.86
  -3   2  10  199.89   15.84
   3  -2  10  204.55   12.30
  -3  -2  10  219.70   12.94
   3   2 -10  189.35   11.02
   3  -2  10  168.19   10.17
  -3   2  10  153.55   10.63
  -3   2 -10  148.56    8.64
   3  -2 -10  172.51    9.32
   3   2  10  217.99   12.11
  -3  -2 -10  211.75   11.78
   3  -2  11   57.16   13.33
  -3  -2  11   47.64    3.06
  -3  -2 -11   49.02   13.64
   3  -2 -11   63.34   10.32
  -3   2  11   59.74    7.73
  -3  -2  11   62.39    7.44
   3  -2  11   66.18   13.93
  -3  -2  11   63.13   12.11
   3   2 -11   65.31   15.09
   3  -2  11   55.15    8.38
  -3   2  11   61.97   12.14
  -3   2 -11   41.78    8.39
   3  -2 -11   49.27   10.32
   3   2  11   74.88   17.46
  -3  -2 -12 1070.78   31.48
  -3  -2  12 1034.44   27.79
   3  -2 -12 1312.59   36.38
  -3   2  12 1174.34   36.06
  -3  -2  12 1295.22   39.87
   3  -2  12 1129.64   32.38
  -3  -2  12 1372.08   40.15
   3  -2  12 1026.09   29.33
  -3   2  12  999.92   28.49
  -3   2 -12 1010.23   29.92
   3   2  12 1420.39   39.60
  -3  -2  13  474.80   13.58
   3  -2 -13  665.03   22.21
  -3  -2  13  690.65   21.17
   3  -2  13  595.79   20.23
  -3  -2  13  612.11   33.06
   3  -2  13  498.74   15.77
  -3   2  13  492.22   16.90
   3   2  13  642.35   21.12
  -3  -2  14  477.54   13.27
   3  -2 -14  570.35   17.18
  -3   2  14  518.57   19.05
  -3  -2  14  538.08   15.71
   3  -2  14  548.75   17.71
  -3  -2  14  525.07   23.09
   3  -2  14  501.62   20.97
  -3   2  14  473.66   16.16
   3  -2 -14  461.87   14.10
   3   2  14  663.32   28.10
  -3  -2 -15   12.60    4.34
  -3  -2  15    7.49    2.25
   3  -2 -15    7.25    2.32
  -3   2  15    4.14    2.81
  -3  -2  15    9.13    2.66
   3  -2  15    3.43    2.05
  -3  -2  15    3.58    3.90
   3  -2  15    3.02    3.15
  -3   2  15    6.51    3.38
   3  -2 -15    4.79    2.86
   3   2  15    8.16    4.00
  -3  -2 -16    2.50    2.75
   3  -2 -16   -1.04    2.29
  -3   2  16    7.94    3.57
   3  -2  16    3.36    2.77
  -3  -2  16    3.66    3.98
   3  -2  16   -0.43    5.02
  -3   2  16    2.06    3.35
   3   2  16   -0.52    4.47
   3  -2 -17  367.30   16.54
  -3   2  17  338.97   17.75
  -3  -2  17  373.05   16.22
   3  -2  17  310.80   20.67
  -3  -2  17  378.01   19.46
   3  -2  17  337.46   15.76
  -3   2  17  337.90   16.66
   3   2  17  391.16   18.84
  -3  -2 -18  746.50   28.82
   3  -2 -18  822.70   29.21
  -3   2  18  810.27   27.65
  -3  -2  18  804.01   26.91
   3  -2  18  737.87   27.13
  -3  -2  18  871.99   31.87
   3  -2  18  746.12   26.72
  -3   2  18  750.99   26.84
   3   2  18  883.20   33.20
   3  -2 -19   81.66    4.58
  -3   2  19   72.99    5.93
  -3  -2  19   76.35    7.93
   3  -2  19   62.17   17.99
   3  -2  19   83.19   20.69
  -3   2  19   93.80   10.24
   3   2  19   76.72    6.16
  -3  -2 -20  100.88   10.85
   3  -2 -20  104.40   15.63
  -3  -2  20  100.90   14.13
  -3   2  20   89.43   13.84
  -3  -2  20  105.44    6.78
   3  -2  20   81.28    4.98
  -3  -2  20  107.55   20.62
   3  -2  20  109.61   10.04
  -3   2  20   98.64   13.75
   3   2  20  107.74   21.14
   3  -2 -21  361.67   16.76
  -3  -2  21  323.61   10.23
  -3  -2  21  340.57   12.05
   3  -2  21  297.03   22.58
  -3  -2  21  331.53   41.79
   3  -2  21  365.19   14.15
   3   2  21  338.47   41.15
   3  -2 -22  181.45   14.03
  -3  -2  22  191.84   12.02
  -3  -2  22  172.73   12.14
   3  -2  22  162.80   16.70
  -3  -2  22  194.03   27.08
   3  -2  22  212.07   15.32
  -3   2  22  201.43   13.89
   3   2  22  190.31   14.16
  -3  -2 -23    3.16    5.36
   3  -2 -23   10.10    3.59
  -3  -2  23    3.61    1.63
   3  -2  23    3.34    2.20
  -3  -2  23   10.26    3.10
   3  -2  23    8.34    5.04
  -3   2  23    4.35    2.86
   3   2  23    7.58    4.87
  -3  -2 -24    3.29    3.24
   3  -2 -24   13.42    4.14
  -3  -2  24    7.19    3.00
   3  -2  24    5.96    3.19
  -3  -2  24   10.25    8.42
  -3   2  24   18.03    6.67
   3  -2  24    7.74    3.96
   3   2  24   10.71    7.70
  -3  -2 -25  188.80   13.09
   3  -2 -25  170.05   12.09
  -3  -2  25  202.56   23.12
  -3   2  25  217.30   14.14
   3   2  25  200.79   19.43
  -3  -2 -26  451.77   17.40
   3  -2 -26  452.86   16.77
  -3  -2  26  432.10   14.96
  -3  -2  26  432.58   18.15
   3  -2  26  474.37   18.29
  -3  -2  26  448.93   31.40
  -3   2  26  495.25   19.95
   3  -2  26  464.37   18.34
   3   2  26  496.31   42.98
  -3  -2 -27  414.52   37.68
   3  -2 -27  349.08   17.28
  -3  -2  27  311.48   17.40
   3  -2  27  356.63   18.35
  -3  -2  27  345.78   22.87
   3  -2  27  393.64   21.03
   3   2  27  346.02   27.85
  -3  -2 -28   41.73   10.87
   3  -2 -28   38.70   11.21
  -3  -2  28   28.66    8.34
   3  -2  28   44.53    9.69
  -3  -2  28   39.02    8.86
  -3   2  28   40.43   10.02
   3   2  28   30.93    8.23
  -3  -2 -29   34.02    6.34
   3  -2 -29   16.66    4.70
  -3  -2  29    6.07    4.61
   3  -2  29   10.25    5.04
  -3  -2  29   19.14    7.27
   3  -2  29   26.82    8.88
   3   2  29   17.31   10.94
  -3  -2 -30  211.74   14.82
   3  -2 -30  193.97   16.88
  -3  -2  30  199.84   10.72
   3  -2  30  220.17    9.51
  -3  -2  30  195.13   29.71
   3  -2  30  245.29   18.44
  -3   2  30  225.05   21.50
   3   2  30  210.27   20.29
  -3  -2 -31   12.16    6.19
   3  -2 -31    7.33    2.29
  -3  -2  31    2.14    1.89
   3  -2  31    4.64    4.86
  -3  -2  31   -3.73    5.49
  -3   2  31    2.56    5.59
   3  -2  31    2.97    5.16
   3   2  31    5.09    4.38
  -3  -2 -32   10.38    5.39
   3  -2 -32    5.78    2.01
   3  -2  32    4.06    4.67
  -3  -2  32    9.17    4.46
   3  -2  32    6.20    3.63
  -3   2  32    6.13    3.64
   3   2  32    7.64    4.95
  -3  -2 -33   12.66    5.55
   3  -2 -33    0.91    2.48
   3  -2  33    3.60    5.68
  -3  -2  33    8.83    4.91
  -3   2  33    3.70    4.87
   3   2  33    2.42    4.36
  -3  -2 -34  153.14    8.66
   3  -2 -34  132.99   15.68
   3  -2  34  140.42   21.55
  -3  -2  34  134.97   11.86
   3  -2  34  148.09   32.06
  -3   2  34  141.62   32.26
   3   2  34  146.26   36.01
  -3  -2 -35  230.51   25.01
   3  -2  35  176.31   22.26
  -3  -2  35  210.21   23.20
  -3   2  35  242.53   25.32
   3  -2  35  222.81   24.90
   3   2  35  203.39   45.99
  -3  -2 -36  185.42   13.74
   3  -2  36  167.77   20.95
  -3  -2  36  178.07   17.98
   3  -2  36  192.39   23.48
  -3   2  36  166.94   43.40
   3   2  36  148.27   37.10
  -3  -2 -37    6.21    5.30
   3  -2  37    9.06    6.45
  -3  -2  37    6.21    7.68
   3  -2  37   15.04    8.27
  -3   2  37    8.05    3.89
   3   2  37    7.81    6.16
  -3  -2 -38   13.10    3.50
   3  -2  38   10.80    4.82
  -3  -2  38   13.27    5.62
   3  -2  38    5.78    8.86
  -3   2  38   12.55    6.91
   3   2  38    5.24    8.80
  -3  -2 -39    7.78    3.97
   3  -2  39    3.73    4.62
  -3  -2  39   19.84    7.14
   3  -2  39    5.09    7.57
  -3   2  39    6.09    3.21
   3   2  39    9.52    8.79
  -3  -2 -40    2.87    1.67
   3  -2  40    5.07    6.07
  -3  -2  40   22.38    7.01
  -3   2  40   11.11    7.75
   3  -2  40    6.93    5.72
  -4  -2   0 1154.79   17.51
   4   2   0 1436.93   19.39
   4  -2   0 1673.09   23.46
  -4   2   0 1614.89   22.52
   4   2   0 1773.54   26.54
  -4  -2   1  424.79    8.55
  -4  -2  -1  437.31   13.35
   4   2   1  517.81    9.94
   4   2  -1  549.37    9.80
   4  -2  -1  660.22   13.67
   4  -2   1  656.82   11.49
  -4   2   1  640.62   11.46
  -4   2  -1  610.23   11.82
  -4  -2  -1  686.72   14.17
  -4  -2   1  695.41   14.47
   4   2   1  695.35   12.00
   4   2  -1  673.27   13.76
   4  -2   1  630.77    8.20
  -4  -2  -2   42.53   10.49
   4   2   2   43.38   11.69
   4   2  -2   40.98    3.30
   4  -2  -2   54.80    5.23
   4  -2   2   49.69    4.75
  -4   2   2   54.78    9.81
  -4   2  -2   59.79    5.94
  -4  -2  -2   65.37    7.78
   4   2   2   54.41    6.98
  -4  -2   2   59.82    6.12
   4   2  -2   57.97    5.34
   4  -2   2   42.33    2.79
  -4   2  -2   52.55    2.94
  -4  -2  -3    2.99    2.54
  -4  -2   3    3.04    2.15
   4   2   3    7.34    3.19
   4   2  -3    6.99    1.62
   4  -2  -3    4.75    2.17
  -4   2   3    9.59    2.76
   4  -2   3    5.69    2.73
  -4   2  -3    6.29    1.33
   4   2   3    4.60    2.37
  -4  -2   3    6.18    2.00
   4   2  -3    9.51    3.35
  -4   2   3    6.31    1.09
   4  -2   3    6.63    2.10
  -4   2  -3    5.76    1.40
   4  -2  -3    5.44    1.15
   4   2   3   11.03    3.94
  -4  -2  -4   26.32    6.65
  -4  -2   4   27.36    6.89
   4   2   4   27.22    6.03
   4   2  -4   28.23    3.89
   4  -2  -4   35.93    7.80
  -4   2   4   30.61    5.87
   4  -2   4   30.92    7.32
  -4   2  -4   25.58    8.09
   4   2   4   37.19    9.28
  -4  -2   4   40.91   11.31
   4   2  -4   33.82    7.71
  -4   2   4   32.98    2.63
   4  -2   4   26.23    5.58
   4  -2  -4   30.54    3.42
  -4   2  -4   35.00    5.69
   4   2   4   44.11   10.05
  -4  -2  -5   64.77   12.16
  -4  -2   5   59.84    6.56
   4   2   5   70.30   10.01
   4   2  -5   92.70    4.88
   4  -2  -5   95.93    6.09
  -4   2   5   90.16    6.17
   4  -2   5  103.31    6.88
  -4   2  -5   93.73    6.99
   4   2   5  101.03    9.67
  -4  -2   5   90.08   12.74
   4   2  -5   97.67    6.23
  -4   2   5   91.75    4.72
   4  -2   5   75.52    4.89
   4  -2  -5   81.23    4.88
  -4   2  -5   84.26    4.54
   4   2   5  105.24    8.40
  -4  -2   6  210.64   11.43
  -4  -2  -6  207.01   11.82
   4   2   6  203.37   15.28
   4   2  -6  273.87   13.70
   4  -2  -6  269.82   14.14
  -4   2   6  260.65   14.94
   4  -2   6  266.55   15.28
  -4   2  -6  278.62   17.51
   4   2   6  305.07   16.40
  -4  -2   6  324.19   18.62
   4   2  -6  300.46   15.86
  -4   2   6  276.02   14.73
   4  -2   6  210.53   12.23
   4  -2  -6  241.42   12.72
  -4   2  -6  257.01   13.41
   4   2   6  315.52   16.51
  -4  -2  -7  899.09   28.62
  -4  -2   7 1028.32   27.76
   4   2   7  947.27   26.85
   4   2  -7 1330.42   35.61
   4  -2  -7 1354.74   38.32
  -4   2   7 1298.73   35.43
  -4  -2   7 1434.47   39.81
   4   2  -7 1406.36   39.08
  -4   2   7 1204.49   32.80
   4  -2   7  980.15   27.53
   4  -2  -7 1071.66   29.24
  -4   2  -7 1131.62   31.09
   4   2   7 1458.04   40.48
  -4  -2  -7 1408.92   40.45
   4   2   8  534.46   19.54
   4  -2  -8  761.49   21.91
   4   2  -8  797.12   21.47
  -4   2   8  734.08   21.41
  -4  -2   8  843.91   25.34
   4   2  -8  811.56   23.32
  -4   2   8  661.12   18.85
   4  -2   8  561.68   17.30
   4  -2  -8  570.27   16.29
  -4   2  -8  594.88   21.23
   4   2   8  872.31   25.56
  -4  -2  -8  856.37   25.90
  -4  -2  -9 1661.04   50.45
   4  -2  -9 2261.81   61.10
  -4   2   9 2078.14   56.29
   4  -2   9 2145.77   59.22
  -4  -2   9 2367.16   64.97
   4   2  -9 2313.27   63.23
  -4   2   9 1932.19   52.72
   4  -2   9 1696.63   47.51
   4  -2  -9 1705.00   47.06
  -4   2  -9 1743.45   47.34
   4   2   9 2237.97   62.70
  -4  -2  -9 2414.10   66.64
  -4  -2 -10  122.12    9.66
   4  -2 -10  147.76   10.04
  -4   2  10  148.61   22.77
   4  -2  10  160.79   16.48
  -4  -2  10  166.12   11.65
   4   2 -10  141.92   11.09
  -4   2  10  151.04   35.02
   4  -2  10  106.35   11.53
   4  -2 -10  104.83    6.67
  -4   2 -10  112.62    7.00
   4   2  10  162.03   14.26
  -4  -2 -11   77.51   22.34
   4  -2 -11   76.65    7.19
  -4   2  11  157.80   29.15
   4  -2  11   77.02   10.13
  -4  -2  11   84.67    7.68
  -4   2  11   59.14    4.64
   4  -2  11   77.25   18.68
   4  -2 -11   62.99    3.98
  -4   2 -11   59.22    5.38
   4   2  11   94.31    7.35
   4  -2 -12  119.71   11.89
  -4   2  12  108.41   23.99
   4  -2  12  116.68   25.93
  -4  -2  12  129.78   22.10
  -4   2  12   96.01   13.73
   4  -2  12   86.69    8.91
   4  -2 -12   90.27   10.23
  -4   2 -12   83.12    8.91
   4   2  12  140.43   17.08
  -4  -2 -13  415.78   14.12
   4  -2 -13  564.58   18.20
   4  -2  13  493.92   25.70
  -4  -2  13  529.45   21.08
  -4   2  13  433.02   15.72
   4  -2  13  441.18   14.60
   4  -2 -13  446.96   13.79
   4   2  13  558.23   17.71
   4  -2 -14  342.52   21.57
   4  -2  14  285.17   20.07
  -4  -2  14  358.52   23.32
  -4   2  14  288.16   18.28
   4  -2  14  281.31   18.00
   4  -2 -14  256.62   16.54
   4   2  14  355.60   23.06
  -4  -2 -15   -1.84    4.41
   4  -2 -15    3.56    2.70
   4  -2  15    2.21    3.88
  -4  -2  15   -0.92    3.01
  -4   2  15    1.51    2.20
   4  -2  15    1.91    1.92
   4  -2 -15    3.12    1.22
   4   2  15    5.62    3.14
   4  -2 -16  179.69   12.21
  -4   2  16  156.41    6.62
   4  -2  16  151.00    9.41
  -4  -2  16  191.86   10.19
  -4   2  16  144.10    7.58
   4  -2  16  162.64   15.25
   4   2  16  169.76   10.66
  -4  -2 -17  834.56   29.71
   4  -2 -17  961.19   33.64
  -4  -2  17  801.16   26.35
  -4   2  17  936.72   31.80
   4  -2  17  799.52   29.30
  -4  -2  17  987.65   36.03
  -4   2  17  774.50   31.30
   4  -2  17  808.25   28.57
   4   2  17  972.23   37.24
  -4  -2 -18  199.95   16.37
   4  -2 -18  191.95   12.69
  -4  -2  18  150.70    8.14
  -4   2  18  173.89    9.82
  -4  -2  18  199.06   10.69
   4  -2  18  170.82   15.19
  -4  -2  18  206.32   13.15
  -4   2  18  166.69   10.60
   4  -2  18  195.60   15.78
   4   2  18  223.36   14.20
  -4  -2 -19   41.36    7.47
   4  -2 -19   25.03    5.02
  -4  -2  19   17.18    2.60
  -4   2  19   23.36    5.87
  -4  -2  19   23.35    3.57
   4  -2  19    5.77    5.66
  -4  -2  19   21.23    5.21
  -4   2  19   27.34    7.07
   4  -2  19   29.38    8.04
   4   2  19   20.87    5.13
  -4  -2 -20    9.59    4.45
   4  -2 -20    3.58    1.35
  -4  -2  20    0.01    0.89
  -4   2  20   10.02    3.40
   4  -2  20    1.94    2.39
  -4  -2  20    8.26    5.09
  -4   2  20    5.36    5.42
   4  -2  20    3.71    4.86
   4   2  20    7.04    3.17
  -4  -2  21  267.97   16.41
  -4   2  21  326.20    6.19
  -4  -2  21  366.89   14.83
   4  -2  21  331.23   14.58
  -4  -2  21  390.90   18.67
  -4   2  21  361.82   17.02
   4  -2  21  413.89   28.57
   4   2  21  368.87   18.32
   4  -2 -22  275.01   19.86
  -4   2  22  263.88   16.51
  -4  -2  22  304.50   18.82
   4  -2  22  277.83   18.01
  -4  -2  22  315.66   10.27
   4  -2  22  347.82   25.01
  -4   2  22  281.85   18.69
   4   2  22  328.41   12.75
   4  -2 -23  195.81   10.95
  -4  -2  23  211.17   11.81
   4  -2  23  206.58   14.93
  -4  -2  23  233.14   15.25
  -4   2  23  223.05   13.02
   4  -2  23  254.01   25.45
   4   2  23  205.84   23.75
  -4  -2 -24    1.89    2.72
   4  -2 -24   -1.14    2.52
  -4  -2  24    0.83    0.86
  -4  -2  24   -1.06    1.26
   4  -2  24    0.56    1.79
  -4  -2  24    3.22    3.43
  -4   2  24    4.47    3.25
   4  -2  24    1.43    3.61
   4   2  24    3.39    2.16
  -4  -2 -25  178.80   14.08
   4  -2 -25  172.15   17.47
  -4  -2  25  142.50    8.34
  -4  -2  25  166.86    8.98
   4  -2  25  163.94   10.78
  -4  -2  25  196.40   14.27
  -4   2  25  195.56   13.01
   4  -2  25  192.79   18.75
   4   2  25  185.48   16.53
  -4  -2 -26  115.17   14.98
   4  -2 -26  113.66   13.61
  -4  -2  26  101.91    4.89
   4  -2  26  109.34    7.70
  -4  -2  26  105.91   25.48
  -4   2  26  111.02   15.70
   4   2  26  124.97   20.94
  -4  -2 -27   13.04    6.07
   4  -2 -27    5.94    3.15
  -4  -2  27    0.39    1.03
  -4  -2  27    2.87    2.98
  -4   2  27    3.18    2.04
   4  -2  27    2.61    3.48
   4   2  27   -1.76    6.02
  -4  -2 -28   -0.49    5.07
   4  -2 -28    4.93    2.87
  -4  -2  28    2.69    1.71
   4  -2  28    3.90    2.97
  -4   2  28    7.11    2.88
   4  -2  28    2.81    3.10
   4   2  28    6.87    3.18
  -4  -2 -29   22.38    6.08
   4  -2 -29   28.95    6.25
  -4  -2  29   12.18    3.18
   4  -2  29   24.69    6.51
  -4  -2  29   15.10    8.10
  -4   2  29   26.16    7.92
   4  -2  29   32.87    8.23
   4   2  29   24.60    9.27
  -4  -2 -30  178.79   30.51
   4  -2 -30  144.68    7.73
   4  -2  30  161.50   12.91
  -4  -2  30  156.30   12.29
   4  -2  30  152.82   15.64
  -4   2  30  166.82   38.91
   4   2  30  116.90   24.16
  -4  -2 -31  510.07   43.15
   4  -2 -31  447.53   23.83
   4  -2  31  491.52   28.64
  -4  -2  31  422.33   35.53
  -4   2  31  536.66   29.57
   4   2  31  428.32   34.40
  -4  -2 -32   80.91   18.36
   4  -2  32   57.95   25.61
  -4  -2  32   88.23   25.21
  -4   2  32   85.73   15.07
   4   2  32   79.64   20.15
  -4  -2 -33   10.44    4.87
   4  -2  33    8.56    4.05
  -4  -2  33    4.77    4.18
  -4   2  33   -0.32    4.47
   4  -2  33   -0.72    4.24
   4   2  33   11.74    5.63
  -4  -2 -34   40.26   10.16
   4  -2  34   47.22   14.58
  -4  -2  34   44.20    9.77
  -4   2  34   48.08   16.88
   4  -2  34   39.28    9.76
   4   2  34   52.53   11.63
  -4  -2 -35   29.59    5.84
   4  -2  35   15.39    7.23
  -4  -2  35   19.81    6.47
  -4   2  35   20.64    7.12
   4  -2  35   14.49    5.39
   4   2  35    7.32    6.71
  -4  -2 -36   14.55    6.18
   4  -2  36    6.19    3.50
  -4  -2  36    1.08    6.54
  -4   2  36    5.24    3.12
   4  -2  36   14.09    6.35
   4   2  36   12.18    7.36
  -4  -2 -37    4.85    6.08
   4  -2  37    6.20    4.76
  -4  -2  37    9.65    7.13
  -4   2  37    7.30    8.02
   4  -2  37    1.42    3.01
   4   2  37    7.56    5.04
  -4  -2 -38   13.67    9.59
   4  -2  38    3.00    7.93
  -4  -2  38    7.85    6.28
  -4   2  38   21.40    6.82
   4  -2  38   27.91    9.10
   4   2  38   30.93    8.72
  -4  -2 -39  236.66   25.32
   4  -2  39  261.51   21.29
  -4  -2  39  259.05   37.11
   4  -2  39  245.26   37.75
  -4   2  39  250.35   28.21
   4   2  39  261.71   28.22
  -4  -2 -40   72.30   20.17
   4  -2  40   81.17   26.35
  -4  -2  40   75.43   22.03
   4  -2  40   78.38   32.03
  -4   2  40   94.49   19.53
   4   2  40  129.56   17.98
  -5  -2   0    1.68    2.38
   5   2   0   -1.98    1.57
   5  -2   0    4.77    2.12
  -5   2   0   -0.01    3.42
  -5  -2   0    3.79    1.59
   5   2   0    1.61    1.94
  -5  -2  -1   91.50    8.99
  -5  -2   1  104.55    7.64
   5   2  -1  107.45    8.69
   5   2   1  102.64    6.18
   5  -2  -1  147.34   11.31
   5  -2   1  138.17    9.54
  -5   2   1  139.73   12.47
  -5   2  -1  130.22   17.71
  -5  -2  -1  134.11   11.19
  -5  -2   1  143.88    8.97
   5  -2   1  139.50    7.42
   5   2   1  133.57   10.09
   5   2  -1  123.10    9.76
   5  -2   1   97.07    5.15
  -5  -2  -2  156.52   12.04
  -5  -2   2  172.70    9.68
   5   2   2  185.21    9.88
   5   2  -2  187.21    9.86
   5  -2  -2  236.53   13.57
   5  -2   2  211.18   11.86
  -5   2   2  238.24   15.63
  -5   2  -2  230.31   13.85
  -5  -2  -2  257.43   18.64
   5   2   2  255.94   13.60
  -5  -2   2  247.98   13.50
   5   2  -2  220.62   11.79
   5  -2   2  158.68    8.09
  -5  -2   3  930.06   27.36
  -5  -2  -3  797.09   23.83
   5   2   3  855.94   26.62
   5   2  -3  993.92   28.66
   5  -2  -3 1180.58   33.03
   5  -2   3 1144.41   32.44
  -5   2   3 1126.20   32.44
  -5   2  -3 1119.60   32.92
   5   2   3 1168.67   33.62
  -5  -2   3 1278.66   39.10
   5   2  -3 1204.12   33.46
   5  -2   3  810.52   22.81
   5  -2  -3  901.54   24.14
  -5   2  -3 1223.13   33.00
   5   2   3 1259.28   35.90
  -5  -2   4  746.51   20.78
  -5  -2  -4  594.90   17.56
   5   2   4  657.00   19.30
   5   2  -4  786.51   23.23
   5  -2  -4  893.05   25.05
  -5   2   4  860.69   24.36
   5  -2   4  870.52   28.72
  -5   2  -4  864.25   25.53
   5   2   4  936.87   26.90
  -5  -2   4  996.05   28.31
  -5   2   4  961.53   26.09
   5   2  -4  939.42   29.63
   5  -2   4  598.53   17.41
   5  -2  -4  653.41   17.96
  -5   2  -4  909.82   25.10
   5   2   4  979.62   27.90
  -5  -2   5 1275.24   34.58
  -5  -2  -5 1060.92   31.86
   5   2   5 1109.99   31.85
   5   2  -5 1378.44   37.78
   5  -2  -5 1536.64   42.83
  -5   2   5 1433.37   39.39
   5  -2   5 1519.18   46.12
   5   2   5 1542.78   42.98
  -5  -2   5 1647.22   47.23
   5   2  -5 1533.85   42.72
  -5   2   5 1591.17   42.73
   5  -2   5 1065.67   29.18
   5  -2  -5 1075.27   29.39
  -5   2  -5 1527.55   41.29
   5   2   5 1651.65   47.37
  -5  -2   6    9.61    3.00
  -5  -2  -6    7.29    4.60
   5   2   6    7.95    3.97
   5   2  -6   11.71    2.43
   5  -2  -6   17.63    4.25
  -5   2   6   12.94    2.70
   5  -2   6   13.10    4.20
   5   2   6   12.53    3.06
  -5  -2   6   17.78    4.53
   5   2  -6   15.90    4.39
  -5   2   6   10.40    2.31
   5  -2   6    8.03    2.38
   5  -2  -6    5.35    2.06
  -5   2  -6   10.20    2.46
   5   2   6   24.02    4.36
  -5  -2   7   26.98    5.13
  -5  -2  -7   18.27    6.52
   5   2  -7   26.22    4.56
   5  -2  -7   30.73    7.44
  -5   2   7   25.49    5.53
   5  -2   7   30.68    8.13
   5   2   7   31.47    6.69
  -5  -2   7   29.86    8.34
   5   2  -7   26.26    4.58
  -5   2   7   28.63    7.00
   5  -2   7   20.94    5.22
   5  -2  -7   20.34    4.50
  -5   2  -7   29.06    6.73
   5   2   7   41.26    7.80
  -5  -2  -8   96.17    9.68
   5   2  -8  110.46    6.17
   5  -2  -8  117.81    8.08
  -5   2   8  127.93   12.47
   5  -2   8  124.43   14.60
   5   2  -8  111.22    6.05
  -5  -2   8  126.69   17.32
   5   2  -8  117.81   11.24
  -5   2   8  118.35    8.34
   5  -2   8  108.96   11.83
   5  -2  -8   87.49    7.22
  -5   2  -8  109.96    9.11
   5   2   8  134.00   11.55
  -5  -2  -8  127.48    8.69
  -5  -2  -9  373.69    9.04
  -5   2   9  480.04    6.21
  -5  -2   9  556.20   24.44
   5   2  -9  519.48    8.65
  -5   2   9  508.66   15.32
   5  -2   9  375.97    7.51
   5  -2  -9  378.66    7.70
  -5   2  -9  460.75   17.79
   5   2   9  547.76   16.93
  -5  -2 -10  167.63   12.61
   5  -2 -10  264.27   19.33
  -5   2  10  201.45   12.84
   5  -2  10  182.41   14.68
  -5  -2  10  231.98   15.35
  -5   2  10  210.12   15.88
   5  -2  10  178.42   11.90
   5  -2 -10  166.63   11.94
  -5   2 -10  197.79   12.65
   5   2  10  243.72   19.65
  -5  -2 -11    3.44    3.84
   5  -2 -11   -5.43    3.08
  -5   2  11   -1.21    1.71
   5  -2  11    1.05    3.37
  -5  -2  11    1.86    4.03
  -5   2  11    2.06    1.71
   5  -2  11   -0.48    2.98
   5  -2 -11    0.64    1.36
  -5   2 -11    0.27    0.98
   5   2  11    0.50    2.58
  -5  -2 -12   92.95   23.71
   5  -2 -12   98.90    4.10
  -5   2  12  116.75    9.55
   5  -2  12   94.88   15.67
  -5  -2  12   95.72   11.79
  -5   2  12   82.50    4.89
   5  -2  12   74.03    9.80
   5  -2 -12   72.46    4.23
  -5   2 -12   83.18    8.44
   5   2  12   99.25    7.47
  -5  -2 -13  867.42   32.08
   5  -2 -13 1204.73   41.10
  -5   2  13 1110.78   37.38
   5  -2  13 1029.35   35.99
  -5  -2  13 1221.54   42.26
  -5   2  13 1068.74   38.28
   5  -2 -13  938.12   32.34
   5   2  13 1204.39   42.77
  -5  -2 -14   65.72    9.96
   5  -2 -14   70.47    8.18
  -5   2  14   60.33    8.52
   5  -2  14   66.12   15.52
  -5  -2  14   74.89    6.44
   5  -2 -14   39.12    8.21
   5   2  14   72.90    8.39
   5  -2 -15   26.43    5.72
  -5   2  15   23.45    4.12
   5  -2  15   25.12    5.22
  -5  -2  15   25.51    7.12
  -5   2  15   27.66    7.37
   5  -2  15   15.76    3.04
   5   2  15   27.60    7.57
  -5  -2 -16   62.93   14.29
   5  -2 -16   96.71    6.85
  -5   2  16   74.94    6.90
   5  -2  16   78.50   20.13
  -5  -2  16   74.64    9.81
  -5   2  16   75.61   14.11
   5  -2  16   74.80   16.91
   5   2  16   84.76   18.54
  -5  -2 -17  319.25   23.44
   5  -2 -17  383.51   12.14
  -5   2  17  321.07   18.25
   5  -2  17  325.60   12.16
  -5  -2  17  374.10   46.28
  -5   2  17  304.14   36.92
   5  -2  17  301.75   36.47
   5   2  17  388.65   14.34
   5  -2 -18   73.70    8.70
  -5   2  18   76.03   15.43
   5  -2  18   77.13   18.01
  -5  -2  18   98.66   13.06
  -5   2  18   67.34   11.40
   5  -2  18   62.41    9.79
   5   2  18   86.80    7.68
   5  -2 -19  125.60   10.65
  -5   2  19  116.43    9.08
   5  -2  19  112.32    7.61
  -5  -2  19  124.89   13.06
  -5   2  19  118.43    5.82
   5  -2  19  134.11   12.33
   5   2  19  132.40    9.55
  -5  -2 -20    6.80    3.73
   5  -2 -20   12.14    3.96
  -5   2  20    5.04    1.79
  -5  -2  20    8.95    4.12
  -5   2  20   18.58    5.08
   5  -2  20    6.72    3.77
   5   2  20    8.39    3.84
  -5  -2 -21  546.90   23.77
   5  -2 -21  586.01   23.59
  -5   2  21  537.39   21.73
  -5  -2  21  594.24   27.31
  -5   2  21  515.96   21.35
   5  -2  21  551.83   23.50
   5   2  21  622.94   26.85
   5  -2 -22  154.36   12.98
  -5   2  22  144.71    8.64
   5  -2  22  134.87   11.42
  -5  -2  22  176.29   11.75
  -5   2  22  136.51   14.90
   5   2  22  140.30   28.18
   5  -2 -23   51.58    5.72
  -5   2  23   38.23   11.66
   5  -2  23   60.62   17.07
  -5  -2  23   68.40   15.84
  -5   2  23   54.95   11.49
   5  -2  23   66.59   17.64
   5   2  23   69.05   14.77
  -5  -2 -24   -0.28    5.94
   5  -2 -24    4.91    2.71
  -5   2  24   10.60    6.17
   5  -2  24    2.95    3.17
  -5  -2  24    3.36    5.94
  -5   2  24    8.69    6.46
   5  -2  24    8.68    5.17
   5   2  24   10.05    6.14
  -5  -2 -25  215.40   13.35
   5  -2 -25  207.89   11.97
   5  -2  25  213.99   12.53
  -5  -2  25  231.10   21.14
  -5   2  25  223.40   11.81
   5  -2  25  235.41   13.55
   5   2  25  236.52   22.37
  -5  -2 -26   85.75   17.94
   5  -2 -26   66.00    7.58
   5  -2  26   68.66   13.28
  -5  -2  26   73.38   22.94
  -5   2  26   62.89   11.84
   5  -2  26   80.63   13.29
   5   2  26   75.85   28.04
  -5  -2 -27  667.81   49.44
   5  -2 -27  601.23   30.96
   5  -2  27  634.03   34.43
  -5  -2  27  557.49   43.18
   5  -2  27  618.72   33.18
   5   2  27  641.55   34.75
   5  -2 -28    6.88    3.85
   5  -2  28    5.12    2.85
   5  -2  28    3.36    5.86
   5   2  28   10.12    4.17
  -5  -2 -29   25.53    8.58
   5  -2 -29    5.57    2.23
   5  -2  29   16.12    4.54
  -5  -2  29   19.13    8.90
  -5   2  29    6.87    3.76
   5  -2  29    5.33    6.61
   5   2  29   12.47    5.47
  -5  -2 -30   44.90    9.85
   5  -2  30   25.49    9.26
  -5  -2  30   15.29    3.70
  -5   2  30   29.62    6.96
   5  -2  30   28.52    8.24
   5   2  30   31.74   10.30
  -5  -2 -31   -6.30    5.60
   5  -2  31    1.74    4.09
  -5  -2  31    8.02    2.55
  -5   2  31    1.47    3.02
   5  -2  31    0.86    4.76
   5   2  31    6.12    5.20
  -5  -2 -32    7.60    4.64
   5  -2  32    6.82    3.99
  -5  -2  32    4.77    4.14
  -5   2  32   10.16    2.62
   5  -2  32   14.31    9.93
   5   2  32    5.83    6.82
  -5  -2 -33    6.26    6.30
   5  -2  33   17.05    8.32
  -5  -2  33    9.49    3.57
  -5   2  33    7.85    4.52
   5  -2  33   15.06    8.92
   5   2  33    4.85   10.30
  -5  -2 -34   19.94    8.20
   5  -2  34    7.45    4.36
  -5  -2  34    1.19    5.80
  -5   2  34   17.10    6.11
   5  -2  34    3.45    5.46
   5   2  34   13.52    7.07
  -5  -2 -35  345.89   24.96
   5  -2  35  367.42   18.98
  -5  -2  35  327.80   28.62
  -5   2  35  390.60   27.51
   5  -2  35  391.23   27.41
   5   2  35  368.99   30.45
   5  -2  36   44.77   14.69
  -5  -2  36   22.81    7.31
  -5   2  36   27.42   10.35
   5  -2  36   35.73   11.80
   5   2  36   34.98   11.07
  -5  -2 -37   12.86    4.76
   5  -2  37    4.88    3.73
  -5  -2  37   10.92    6.42
  -5   2  37    4.53    4.46
   5  -2  37    8.94    5.89
   5   2  37   27.57    9.70
  -5  -2 -38   13.68    4.05
   5  -2  38   16.29    5.95
  -5  -2  38   15.76    6.54
  -5   2  38   19.03   10.28
   5  -2  38   21.37    7.55
   5   2  38   24.31   10.69
  -5  -2 -39    4.71    2.85
   5  -2  39    3.65    3.01
  -5  -2  39    1.70    3.95
  -5   2  39    7.24    4.88
   5  -2  39    0.73    4.36
   5   2  39   -1.76    4.49
  -6  -2   0   85.50    7.55
   6   2   0   87.40    6.64
   6  -2   0  117.98    9.10
  -6   2   0   82.90   14.91
  -6  -2   0  138.36   11.35
   6   2   0  121.55    8.51
   6  -2   0  114.52    7.48
   6  -2   0   85.96    5.55
  -6  -2   1 1306.60   36.88
  -6  -2  -1 1243.59   34.97
   6   2   1 1199.52   33.31
   6   2  -1 1245.54   34.47
   6  -2  -1 1532.02   44.03
   6  -2   1 1532.35   42.64
  -6   2   1 1514.96   42.20
  -6  -2  -1 1775.68   50.08
  -6  -2   1 1680.51   47.39
   6   2   1 1663.03   46.05
   6  -2   1 1625.39   43.80
   6   2  -1 1684.61   46.46
   6  -2  -1 1541.20   41.41
   6  -2   1 1216.44   32.98
   6  -2  -1 1459.56   39.22
  -6  -2   2  119.40    9.34
  -6  -2  -2  100.53   19.06
   6   2   2   98.91    6.83
   6   2  -2  110.62    8.61
   6  -2  -2  150.04   10.78
   6  -2   2  137.24   10.35
  -6   2   2  131.17   12.39
   6  -2   2  147.05    9.71
  -6  -2   2  148.54   11.43
   6   2   2  145.98   10.70
   6   2  -2  138.76    9.72
   6  -2  -2  122.30    7.63
   6  -2   2  103.47    7.53
   6  -2  -2  142.33    8.81
  -6  -2   3   21.71    5.62
  -6  -2  -3   17.44    4.26
   6   2   3   16.96    4.65
   6   2  -3   15.16    5.66
   6  -2  -3   26.25    7.60
   6  -2   3   17.92    4.01
  -6   2   3   17.75    4.54
  -6   2   3   24.13    3.33
   6  -2   3   20.58    3.68
   6   2   3   21.85    5.18
  -6  -2   3   29.02    7.15
   6   2  -3   21.45    5.36
   6  -2  -3   17.20    2.23
   6  -2   3   15.78    3.45
   6   2   3   27.78    6.00
  -6  -2   4   66.48    6.89
  -6  -2  -4   55.60   15.18
   6   2   4   45.70   10.89
   6   2  -4   62.28    5.30
   6  -2  -4   68.31   10.21
   6  -2   4   83.62    9.68
  -6   2   4   62.55    6.00
   6   2   4   74.83    8.02
  -6   2   4   80.16    3.63
  -6  -2   4   85.06   13.43
   6   2  -4   70.47    9.62
   6  -2  -4   52.26    3.86
   6  -2   4   52.63    3.68
   6   2   4   82.28    7.68
  -6   2  -4   72.51    3.36
  -6  -2   5  208.11   14.54
  -6  -2  -5  159.42   11.95
   6   2  -5  190.61   12.47
   6  -2  -5  259.07   21.88
   6  -2   5  216.06   16.78
  -6   2   5  200.54   13.83
   6   2   5  246.79   17.70
  -6  -2   5  252.09   16.73
  -6   2   5  233.82   14.60
   6   2  -5  237.34   15.24
   6  -2  -5  157.50    9.96
   6  -2   5  161.53   11.92
   6   2   5  242.10   15.58
  -6   2  -5  244.71   16.32
  -6  -2   6   53.28    5.60
  -6  -2  -6   55.41   14.38
   6   2  -6   57.43    4.91
   6  -2  -6   74.76   15.96
   6  -2   6   51.91   12.39
  -6   2   6   53.42    4.68
  -6  -2   6   71.39   15.63
  -6   2   6   62.97    5.82
   6   2  -6   59.95    4.68
   6  -2   6   45.14    7.16
   6  -2  -6   43.61    4.41
   6   2   6   55.03    5.99
  -6   2  -6   60.99    5.38
  -6  -2  -7  180.97   14.59
   6   2  -7  271.00   16.82
   6  -2  -7  322.30   23.28
  -6   2   7  276.78   17.95
   6  -2   7  289.37   20.80
   6   2  -7  276.20   17.64
  -6  -2   7  328.37   21.16
  -6   2   7  317.07   20.86
   6   2  -7  276.16   18.10
   6  -2   7  212.22   13.99
   6  -2  -7  207.68   13.06
  -6   2  -7  297.48   19.49
   6   2   7  324.44   23.72
  -6  -2  -8  116.22   28.98
   6   2  -8  167.65   10.39
   6  -2  -8  180.56   13.43
  -6   2   8  161.61   11.20
   6  -2   8  165.17   12.45
   6   2  -8  174.16   11.31
  -6  -2   8  210.33   14.39
  -6   2   8  197.32   14.18
   6  -2   8  141.03   15.94
   6  -2  -8  124.08    8.47
  -6   2  -8  177.40   12.16
   6   2   8  189.59   17.68
  -6  -2  -9 1636.09   46.99
   6   2  -9 2170.03   58.36
   6  -2  -9 2242.07   62.02
  -6   2   9 2167.74   59.10
   6   2  -9 2145.79   57.72
   6  -2   9 2108.57   59.74
  -6  -2   9 2435.53   67.30
  -6   2   9 2319.62   63.54
   6  -2   9 1672.46   46.91
   6  -2  -9 1632.71   45.67
  -6   2  -9 2215.52   60.44
   6   2   9 2374.71   65.87
  -6  -2 -10   25.04   14.42
   6  -2 -10   60.43    6.11
  -6   2  10   42.13    4.01
   6  -2  10   55.02   12.08
  -6  -2  10   83.81   18.00
  -6   2  10   55.65   10.58
   6  -2  10   36.68    8.41
   6  -2 -10   32.13    7.51
  -6   2 -10   44.43    8.91
   6   2  10   67.99   14.30
  -6  -2 -11  125.04   15.19
   6  -2 -11  165.53    8.09
  -6   2  11  161.95    6.72
   6  -2  11  165.86   20.27
  -6  -2  11  158.28    7.87
  -6   2  11  165.44   11.53
   6  -2  11  133.47   14.93
   6  -2 -11  122.91    4.94
   6   2  11  181.44    8.58
  -6   2 -11  157.43    9.99
  -6  -2 -12   58.23   13.96
   6  -2 -12   62.55    3.76
  -6   2  12   54.78    7.09
   6  -2  12   59.05   10.88
  -6  -2  12   72.26   11.01
  -6   2  12   66.75   13.06
   6  -2  12   55.08   11.74
   6  -2 -12   37.73    8.10
  -6   2 -12   49.39    6.74
   6   2  12   73.56   13.89
  -6  -2 -13  410.71   26.54
   6  -2 -13  534.88   24.19
  -6   2  13  506.57   22.27
   6  -2  13  437.52   21.04
  -6  -2  13  593.72   27.26
  -6   2  13  543.98   23.15
   6  -2  13  420.10   21.42
   6  -2 -13  434.67   18.79
   6   2  13  552.84   35.63
  -6  -2 -14   55.30   15.04
   6  -2 -14   73.41    5.81
  -6   2  14   58.62    8.42
   6  -2  14   48.86    8.89
  -6  -2  14   63.49   15.27
  -6   2  14   70.60   14.19
   6  -2  14   60.79   16.27
   6  -2 -14   40.45   10.00
   6   2  14   84.12   16.13
  -6  -2 -15   87.21   10.71
   6  -2 -15  114.62    8.13
  -6   2  15   99.97    9.12
   6  -2  15  105.70   16.26
  -6  -2  15  107.15   15.83
  -6   2  15  114.63    8.74
   6  -2  15   95.43   13.86
   6   2  15  126.28   16.91
  -6  -2 -16    9.27    5.42
  -6   2  16    2.85    1.52
   6  -2  16    4.10    5.62
  -6  -2  16    5.49    2.71
  -6   2  16   -1.34    4.44
   6  -2  16    3.96    2.12
   6   2  16    6.13    3.57
  -6  -2 -17  983.77   40.67
   6  -2 -17 1088.44   43.57
  -6   2  17 1083.48   41.86
   6  -2  17 1074.64   42.88
  -6  -2  17 1199.54   51.44
  -6   2  17 1096.04   43.94
   6  -2  17  978.92   39.21
   6   2  17 1156.29   50.10
  -6  -2 -18   16.74    8.64
   6  -2 -18   26.70    5.76
  -6   2  18   15.80    3.56
  -6  -2  18   31.23    6.17
  -6   2  18   10.19    3.55
   6  -2  18   21.07    6.32
   6   2  18   30.88    6.32
  -6  -2 -19   65.51   17.58
   6  -2 -19   75.82   11.59
  -6   2  19   65.35    6.09
   6  -2  19   72.16   17.01
  -6  -2  19   78.52    6.36
  -6   2  19   67.62   12.68
   6  -2  19   64.49   12.03
   6   2  19   95.53   12.01
  -6  -2 -20   49.51   10.38
   6  -2 -20   58.93   12.25
  -6   2  20   44.42    8.56
   6  -2  20   46.72    9.77
  -6  -2  20   60.96   15.94
  -6   2  20   54.83   10.11
   6   2  20   66.28   12.65
   6  -2 -21  196.68   12.55
  -6   2  21  196.01   12.44
   6  -2  21  172.63   11.96
  -6  -2  21  213.61   14.72
  -6   2  21  196.74   14.42
   6  -2  21  204.30   17.63
   6   2  21  230.96   17.29
  -6  -2 -22    9.95    3.70
   6  -2 -22   18.25    5.44
  -6   2  22    3.11    2.73
   6  -2  22   16.62    7.53
  -6  -2  22   20.62    8.80
  -6   2  22    8.93    5.55
   6  -2  22   18.13    5.70
   6   2  22   26.12    5.67
  -6  -2 -23  269.35   18.40
   6  -2 -23  261.26    9.32
  -6   2  23  293.82   14.69
   6  -2  23  244.37   11.91
  -6  -2  23  293.53   24.40
  -6   2  23  226.68   10.52
   6  -2  23  283.78   19.66
   6   2  23  293.95   22.06
  -6  -2 -24   12.76    6.88
   6  -2 -24    6.74    3.15
  -6  -2  24    8.58    5.79
  -6   2  24    2.64    2.35
   6   2  24    7.59    4.84
  -6  -2 -25  146.38   16.49
   6  -2 -25  132.54    8.86
   6  -2  25  135.80   10.62
  -6  -2  25  164.28   12.48
  -6   2  25  151.38    9.57
   6  -2  25  138.74   13.41
   6   2  25  145.78   10.75
  -6  -2 -26   31.40    6.28
   6  -2 -26   15.76    5.75
   6  -2  26   25.81    8.00
  -6  -2  26   31.30    8.89
  -6   2  26   25.81    5.80
   6  -2  26   25.55    9.35
   6   2  26   27.16   12.08
  -6  -2 -27   25.81    7.53
   6  -2 -27   28.67    5.75
   6  -2  27   34.01    6.49
  -6  -2  27   24.89    6.97
  -6   2  27   30.85    7.51
   6  -2  27   41.25   11.90
   6   2  27   29.26    8.00
  -6  -2 -28   13.93    5.93
   6  -2  28   19.67    7.57
  -6  -2  28   17.65    6.26
  -6   2  28    7.40    2.54
   6  -2  28   30.08    8.99
   6   2  28   31.30    7.82
  -6  -2 -29   29.41    9.80
   6  -2  29   23.60   11.48
  -6  -2  29   34.69   10.40
  -6   2  29   29.19    9.05
   6  -2  29   31.47    7.03
   6   2  29   34.09    8.06
   6  -2  30    7.93    6.25
  -6  -2  30    1.85    5.82
   6  -2  30   12.92    4.31
   6   2  30   24.66    9.78
  -6  -2 -31  473.25   39.60
   6  -2  31  493.35   26.39
  -6  -2  31  411.38   40.00
   6  -2  31  475.62   35.08
   6   2  31  477.44   41.78
  -6  -2 -32    6.21    4.66
   6  -2  32    3.49    4.88
  -6  -2  32   -8.08    6.69
  -6   2  32   13.65    6.18
   6  -2  32   14.47    6.45
   6   2  32    8.92    5.20
  -6  -2 -33    7.95    3.64
   6  -2  33    5.23    3.31
  -6   2  33    4.25    2.79
   6  -2  33    7.23    3.76
   6   2  33    9.38    6.45
  -6  -2 -34   10.84    6.22
   6  -2  34   20.06    5.18
  -6  -2  34   20.27   11.62
  -6   2  34   11.88    5.07
   6  -2  34   22.67    8.43
   6   2  34   18.80   11.17
  -6  -2 -35    9.57    4.57
   6  -2  35    8.46    6.74
  -6  -2  35   10.35    6.19
  -6   2  35    2.95    5.61
   6  -2  35   14.54    5.31
   6   2  35   -0.50    7.19
  -6  -2 -36   -0.86    5.65
   6  -2  36   14.33    6.13
  -6  -2  36   -3.73    5.85
  -6   2  36    6.31    4.73
   6  -2  36    9.07    3.48
   6   2  36    3.24    4.43
  -6  -2 -37   14.00    8.58
   6  -2  37    7.10    5.63
  -6  -2  37    8.25    4.55
  -6   2  37   11.23    3.65
   6  -2  37   18.12    3.22
   6   2  37   12.22    5.29
  -6  -2 -38    4.63    3.25
   6  -2  38    6.39    4.57
  -6  -2  38    5.47    5.97
  -6   2  38   -4.28    5.29
   6  -2  38    2.20    7.59
  -7  -2   0    2.80    1.78
   7  -2   0    0.17    2.63
  -7  -2   0   -1.03    3.83
   7   2   0   -0.03    2.47
   7  -2   0    1.30    0.71
   7  -2   0   -0.02    0.57
  -7  -2   1   86.71    7.36
  -7  -2  -1   95.35    7.44
   7   2  -1   72.06    6.38
   7   2   1   71.48    7.06
   7  -2  -1   96.56    5.49
   7  -2   1  102.78    8.54
  -7  -2  -1   91.78   11.33
  -7  -2   1  112.75    8.82
   7   2   1  109.17    8.79
   7   2  -1   99.34    7.27
   7  -2   1  101.80    3.57
   7  -2  -1   98.35    2.90
   7  -2   1   84.61    2.39
   7  -2  -1   94.24    2.28
  -7  -2   2   -0.25    3.00
  -7  -2  -2    5.70    4.39
   7   2  -2    4.85    2.20
   7  -2  -2    3.79    2.80
   7  -2   2   12.32    3.55
  -7  -2   2    8.63    5.87
   7  -2   2    6.52    2.11
   7   2  -2    7.98    3.70
   7  -2  -2    4.88    1.51
   7  -2   2    6.93    2.17
   7  -2  -2    3.48    1.17
   7   2   2   11.06    5.37
  -7  -2   3  965.66   27.39
  -7  -2  -3  831.13   27.48
   7   2  -3  838.31   24.04
   7  -2  -3 1070.30   32.33
   7  -2   3  972.78   30.05
  -7   2   3  969.18   28.24
  -7  -2   3 1145.94   36.38
   7  -2   3 1073.95   29.52
   7  -2  -3  946.14   25.79
   7  -2   3  855.10   23.99
   7  -2  -3 1120.93   30.42
   7   2   3 1163.41   33.22
  -7  -2   4   33.95    4.79
  -7  -2  -4    8.28   11.65
   7   2  -4   23.26    5.82
   7  -2  -4   50.63    8.13
   7  -2   4   43.40    9.48
   7  -2   4   32.92    5.93
  -7  -2   4   50.55   10.19
   7  -2  -4   28.13    4.12
   7  -2   4   35.94    5.50
   7   2   4   49.59    8.50
   7   2  -5 1169.64   38.95
   7  -2  -5 1322.54   45.11
   7  -2   5 1296.43   45.90
  -7   2   5 1242.61   44.77
   7   2  -5 1256.23   42.06
  -7   2   5 1450.37   47.89
  -7  -2   5 1485.52   50.76
   7  -2  -5 1070.86   35.39
   7  -2   5 1026.57   35.45
   7   2   5 1485.64   50.42
  -7  -2  -6   83.51   17.35
   7   2  -6   97.46    5.35
   7  -2  -6  129.06   13.16
   7  -2   6  106.94    9.36
  -7   2   6  106.90   11.60
   7   2  -6  110.04    9.54
  -7  -2   6  142.73    8.97
  -7   2   6  117.08    7.34
   7  -2  -6   89.76    4.83
   7  -2   6   91.60    6.50
   7   2   6  147.09    9.16
  -7   2  -6  124.50    7.88
  -7  -2  -7    4.74    3.27
   7   2  -7    3.15    1.47
   7  -2  -7    4.68    3.65
  -7   2   7    8.39    2.36
   7  -2   7    6.11    3.01
   7   2  -7    6.57    3.06
  -7  -2   7    2.21    3.17
  -7   2   7    1.20    0.87
   7  -2  -7    0.07    1.16
   7  -2   7    1.51    2.26
   7   2   7   12.55    4.97
  -7   2  -7    1.68    2.17
  -7  -2  -8    8.04    6.33
   7   2  -8   18.67    3.70
   7  -2  -8   19.18    5.62
  -7   2   8   14.75    3.74
   7   2  -8   22.11    4.21
   7  -2   8   24.60    4.93
  -7  -2   8   36.94    9.09
  -7   2   8   24.99    4.42
   7  -2  -8   15.72    3.10
   7  -2   8   17.09    4.87
   7   2   8   22.05    5.45
  -7   2  -8   22.58    5.02
  -7  -2  -9  365.86   16.92
   7   2  -9  506.87   21.13
   7  -2  -9  537.70   23.22
   7   2  -9  524.23   21.80
  -7   2   9  495.56   21.88
   7  -2   9  486.22   26.93
  -7  -2   9  542.75   23.96
  -7   2   9  556.68   23.99
   7  -2   9  415.84   18.84
   7  -2  -9  379.34   17.68
   7   2   9  564.05   24.67
  -7   2  -9  542.05   23.63
  -7  -2 -10   25.65    7.50
   7   2 -10   33.18    2.74
   7  -2 -10   36.77    8.81
   7   2 -10   37.26    3.41
  -7   2  10   27.80    3.92
  -7  -2  10   44.67    8.23
  -7   2  10   43.82    8.90
   7  -2  10   28.69    8.88
   7  -2 -10   26.70    6.53
   7   2  10   53.26   12.18
  -7   2 -10   34.18    7.03
  -7  -2 -11   16.62    5.49
   7  -2 -11   32.36    6.14
  -7   2  11   24.34    6.24
   7  -2  11   26.73    7.14
  -7  -2  11   37.44    9.08
  -7   2  11   35.74    8.22
   7  -2  11   22.51    8.75
   7  -2 -11   19.44    6.30
   7   2  11   33.12    8.54
  -7   2 -11   27.10    6.18
  -7  -2 -12    8.67    8.78
   7  -2 -12   22.16    3.27
   7  -2  12   24.03    6.72
  -7  -2  12   28.42    6.86
  -7   2  12   12.95    4.85
   7  -2  12   18.93    4.67
   7   2  12   22.05    9.30
  -7  -2 -13  983.86   32.00
   7  -2 -13 1226.82   35.15
  -7   2  13 1150.02   33.39
   7  -2  13 1019.50   34.01
  -7  -2  13 1285.95   42.13
  -7   2  13 1278.60   37.82
   7  -2  13  980.33   33.18
   7  -2 -13  930.89   28.13
   7   2  13 1283.72   40.98
  -7  -2 -14   48.82   12.06
   7  -2 -14   48.55    8.85
  -7   2  14   32.79    6.48
   7  -2  14   52.26    7.96
  -7  -2  14   61.35   12.17
   7  -2  14   39.47   10.00
   7  -2 -14   29.65    8.05
   7   2  14   63.83   11.18
  -7  -2 -15   32.72    9.16
   7  -2 -15   37.95    9.18
  -7   2  15   32.66    6.20
   7  -2  15   32.75    7.14
  -7  -2  15   42.19   10.07
  -7   2  15   31.33    8.47
   7  -2  15   32.59    5.69
   7   2  15   36.85   10.29
  -7  -2 -16  136.42   14.35
   7  -2 -16  168.99   14.23
  -7   2  16  142.00    9.97
   7  -2  16  159.55   15.22
  -7  -2  16  181.19   13.93
  -7   2  16  173.62   14.04
   7  -2  16  161.70   17.98
   7   2  16  187.33   14.99
  -7  -2 -17  216.45   15.77
   7  -2 -17  256.70   16.14
  -7   2  17  240.08   14.81
   7  -2  17  244.94   33.21
  -7  -2  17  296.24   20.69
  -7   2  17  233.93   19.61
   7  -2  17  253.03   23.76
   7   2  17  295.75   29.10
  -7  -2 -18    4.20    5.02
   7  -2 -18   12.52    2.40
  -7   2  18    2.52    1.96
   7  -2  18    4.04    6.43
  -7  -2  18   17.47    3.69
  -7   2  18    9.25    6.85
   7  -2  18   12.44    2.87
   7   2  18   18.53    5.07
  -7  -2 -19  194.92   16.39
   7  -2 -19  219.49   11.93
  -7   2  19  193.66    9.99
   7  -2  19  167.70   18.87
  -7  -2  19  233.58   13.30
  -7   2  19  219.17   13.45
   7  -2  19  208.90   19.84
   7   2  19  213.00   23.65
  -7  -2 -20   18.57    4.23
   7  -2 -20   21.21    6.73
  -7   2  20   14.85    2.89
   7  -2  20   27.30    8.04
  -7  -2  20   26.08    4.74
  -7   2  20   19.17    5.88
   7  -2  20   12.05    4.98
   7   2  20   15.26    5.35
  -7  -2 -21  280.04   18.67
   7  -2 -21  294.43   11.65
  -7   2  21  239.79    9.02
   7  -2  21  263.14   12.90
  -7  -2  21  309.26   12.62
  -7   2  21  273.51   15.90
   7  -2  21  259.29   22.86
   7   2  21  283.05   16.50
  -7  -2 -22    8.18    5.90
   7  -2 -22    7.28    4.18
   7  -2  22   -0.89    6.43
  -7  -2  22   16.52    7.92
  -7   2  22    6.32    5.15
   7  -2  22   13.97    6.65
   7   2  22   18.85    7.12
   7  -2 -23   86.80    9.28
   7  -2  23   93.99   24.91
  -7  -2  23  107.31   24.04
  -7   2  23   80.61   17.19
   7  -2  23   88.82    9.93
   7   2  23   90.18   20.45
  -7  -2 -24   71.63   13.68
   7  -2 -24   45.64    7.34
   7  -2  24   67.74   12.25
  -7  -2  24   57.65   11.73
  -7   2  24   45.51   13.33
   7  -2  24   62.03   12.38
   7   2  24   56.00   13.15
  -7  -2 -25  170.78   17.10
   7  -2  25  147.93   12.76
  -7  -2  25  170.90   15.13
  -7   2  25  135.22   18.47
   7  -2  25  162.92   15.72
   7   2  25  187.17   21.08
  -7  -2 -26   23.79    5.44
   7  -2  26    4.44    3.20
  -7  -2  26    5.73    4.54
  -7   2  26    3.53    5.41
   7  -2  26    5.78    3.18
   7   2  26   18.31    7.55
  -7  -2 -27  440.94   25.03
   7  -2  27  456.66   25.56
  -7  -2  27  491.10   27.48
  -7   2  27  349.76   28.91
   7  -2  27  530.95   29.31
   7   2  27  498.11   29.86
  -7  -2 -28   17.36    9.13
   7  -2  28   -1.15    5.76
  -7  -2  28   -2.49    7.81
  -7   2  28    2.70    3.07
   7  -2  28    7.03    4.80
   7   2  28   -3.42    6.04
  -7  -2 -29   48.72   12.15
   7  -2  29   45.14   10.22
  -7  -2  29   41.68   12.62
  -7   2  29   34.35   11.08
   7  -2  29   49.78   12.76
   7   2  29   32.99    9.37
  -7  -2 -30    5.53    5.54
   7  -2  30    3.08    5.31
  -7  -2  30   -1.68    5.22
  -7   2  30    2.49    3.38
   7  -2  30   -5.19    5.59
   7   2  30    7.04    3.21
   7  -2  31   15.40    4.67
  -7  -2  31    9.88    6.22
  -7   2  31   16.71    5.60
   7  -2  31   15.44    7.56
   7   2  31   10.81    5.65
   7  -2  32   36.69   11.49
  -7  -2  32   32.09   11.29
  -7   2  32   40.43   14.17
   7  -2  32   45.19   14.14
   7   2  32   30.31   10.07
  -7  -2 -33    6.50    4.89
   7  -2  33   11.51    8.47
  -7  -2  33   10.05    5.96
  -7   2  33   11.87    7.06
   7  -2  33    2.47    5.81
   7   2  33   14.72    6.12
  -7  -2 -34   19.54    3.99
   7  -2  34   23.99    8.06
  -7  -2  34   13.49    5.82
  -7   2  34   10.73    6.45
   7  -2  34   22.98    9.64
   7   2  34   22.88   10.26
  -7  -2 -35  348.37   25.65
   7  -2  35  318.95   35.71
  -7  -2  35  272.03   18.45
  -7   2  35  352.40   21.97
   7  -2  35  288.64   46.03
   7   2  35  338.76   30.44
  -7  -2 -36   -1.42    6.55
   7  -2  36    5.21    3.60
  -7  -2  36    1.37    3.05
  -7   2  36   -0.56    5.78
   7   2  36    6.41    4.19
   7  -2  37    9.23    7.19
  -7  -2  37   10.00    7.09
  -7   2  37    7.55    5.09
   7  -2  37    0.67    7.09
   7   2  37   -5.39    6.31
  -8  -2   0  225.42   11.45
   8  -2   0  256.71   14.95
  -8  -2   0  288.62   15.74
   8  -2   0  266.29   12.98
   8  -2   0  241.87   11.23
  -8  -2   1  799.08   28.07
  -8  -2  -1  725.76   27.32
   8   2  -1  691.69   23.95
   8  -2  -1  779.67   29.57
   8  -2   1  827.36   30.08
  -8  -2   1  941.18   35.35
   8  -2   1  873.09   29.67
   8  -2  -1  872.00   29.03
   8  -2   1  792.49   26.46
   8  -2  -1  848.78   28.19
  -8  -2   2  172.16   13.35
  -8  -2  -2  156.74   32.74
   8   2  -2  137.46    8.63
   8  -2  -2  190.78   10.15
   8  -2   2  196.60   14.85
  -8  -2   2  210.16   16.19
   8  -2   2  191.59   39.55
   8  -2   2  158.77    7.64
   8  -2  -2  185.13    6.69
   8   2   2  207.09   10.81
  -8  -2  -3    4.50    3.17
   8   2  -3    1.41    1.19
   8  -2   3   13.57    7.34
   8   2  -3    4.05    2.53
  -8  -2   3   10.07    5.16
   8  -2   3    7.34    2.30
   8  -2  -3    3.76    0.97
   8  -2   3    9.86    3.03
   8  -2  -3    6.72    1.59
   8   2   3   11.09    2.74
  -8  -2  -4   56.80   16.74
   8   2  -4   48.53    7.30
   8  -2  -4   79.27    7.62
   8  -2   4   70.83   16.03
   8   2  -4   60.78    6.14
   8  -2   4   68.26    6.06
  -8  -2   4   67.01    8.95
   8  -2  -4   57.59    4.12
   8  -2   4   55.61    3.59
   8   2   4   80.02    7.40
  -8  -2  -5  169.76    9.19
   8   2  -5  166.76    8.60
   8  -2  -5  206.10   12.50
   8  -2   5  231.57   16.73
   8   2  -5  207.39    9.99
   8  -2   5  217.77   10.19
  -8  -2   5  252.22   12.31
   8  -2  -5  174.85    8.82
   8  -2   5  173.47    9.64
   8   2   5  246.04   19.18
  -8  -2  -6    4.15    3.09
   8   2  -6    7.18    3.07
   8  -2  -6   10.45    4.62
   8  -2   6   18.94    4.20
   8   2  -6   10.36    3.95
   8  -2   6    9.38    3.48
  -8   2   6   10.97    3.42
  -8  -2   6   23.37    5.90
   8  -2  -6    7.87    2.65
   8  -2   6    7.34    2.73
   8   2   6   13.52    3.92
  -8  -2  -7  171.83   12.45
   8   2  -7  192.14   11.45
   8  -2  -7  225.30   13.07
   8  -2   7  224.13   17.22
   8   2  -7  217.69   12.40
  -8   2   7  196.75   15.83
  -8   2   7  247.52   14.10
  -8  -2   7  215.81   13.31
   8  -2  -7  161.92    9.76
   8  -2   7  176.03   10.69
   8   2   7  230.54   16.02
   8   2  -8   29.60    6.64
   8  -2  -8   45.18    6.83
   8  -2   8   50.89   11.16
   8   2  -8   41.42    6.74
  -8   2   8   33.75    5.62
  -8  -2   8   41.53    7.91
  -8   2   8   36.72    6.76
   8  -2  -8   20.71    4.27
   8  -2   8   32.61    4.60
   8   2   8   46.77   11.69
  -8   2  -8   30.32    6.82
   8   2  -9 1346.69   37.39
   8  -2  -9 1433.93   43.62
   8   2  -9 1421.81   40.03
   8  -2   9 1304.55   42.51
  -8   2   9 1287.76   36.82
  -8  -2   9 1532.51   50.97
  -8   2   9 1514.38   42.60
   8  -2  -9 1046.85   31.10
   8  -2   9 1042.05   31.49
   8   2   9 1490.47   45.00
  -8   2  -9 1507.60   42.53
  -8  -2 -10   57.95   19.35
   8   2 -10   82.94    5.79
   8  -2 -10  100.28   10.18
   8   2 -10   86.54    4.23
  -8   2  10   72.81    9.37
  -8  -2  10  110.44   19.90
  -8   2  10   97.54    8.38
   8  -2  10   72.79    8.45
   8  -2 -10   65.93    8.46
   8   2  10  105.21   17.35
  -8   2 -10   88.01    5.81
  -8  -2 -11    3.52    4.32
   8   2 -11   10.67    2.14
   8  -2 -11   16.36    3.57
   8   2 -11    9.09    2.56
   8  -2  11    4.60    4.29
  -8   2  11    6.49    2.82
  -8  -2  11   11.19    2.93
  -8   2  11   12.62    2.57
   8  -2  11    5.72    1.96
   8  -2 -11    5.22    1.57
   8   2  11   11.29    3.84
  -8   2 -11   10.04    3.83
  -8  -2 -12   34.04   10.87
   8  -2 -12   59.73   10.10
   8  -2  12   56.36   10.86
  -8   2  12   35.42    6.88
  -8  -2  12   75.29   16.29
  -8   2  12   57.50    9.20
   8  -2  12   49.23   11.88
   8  -2 -12   33.54    7.95
   8   2  12   62.01   12.27
  -8  -2 -13  229.64   18.36
   8  -2 -13  326.98   21.71
   8  -2  13  322.11   19.25
  -8   2  13  281.60   18.48
  -8  -2  13  349.05   24.79
  -8   2  13  341.77   23.12
   8  -2  13  285.79   11.17
   8  -2 -13  267.52   16.97
   8   2  13  357.69   22.87
  -8  -2 -14    8.73    6.28
   8  -2 -14   15.81    3.42
  -8   2  14    4.36    2.53
   8  -2  14   11.02    6.02
  -8  -2  14   15.13    8.11
  -8   2  14    4.55    2.59
   8  -2  14    6.17    2.57
   8  -2 -14    5.39    3.87
   8   2  14    5.26    2.50
  -8  -2 -15   17.48    6.85
   8  -2 -15   29.58    6.35
  -8   2  15   15.42    4.38
   8  -2  15   31.26    8.41
  -8  -2  15   27.49    6.51
  -8   2  15   31.27    9.71
   8  -2  15   21.09    3.74
   8   2  15   32.98    6.39
  -8  -2 -16    7.61    6.71
   8  -2 -16    4.13    3.04
  -8   2  16    2.83    1.09
   8  -2  16   -3.26    6.75
  -8  -2  16    8.98    4.69
  -8   2  16    3.80    3.14
   8  -2  16   11.83    4.03
   8   2  16    5.24    3.18
  -8  -2 -17  460.07   18.92
   8  -2 -17  553.63   18.57
  -8   2  17  462.50   15.97
   8  -2  17  505.73   27.75
  -8  -2  17  583.41   22.03
  -8   2  17  551.27   19.72
   8  -2  17  451.99   19.06
   8   2  17  561.15   20.46
  -8  -2 -18   15.36    7.88
   8  -2 -18   18.44    4.92
  -8   2  18    7.81    2.08
   8  -2  18    5.32    4.17
  -8  -2  18   15.25    4.26
  -8   2  18   16.02    4.39
   8  -2  18   15.49    4.18
   8   2  18   22.22    5.20
  -8  -2 -19   37.12   11.38
   8  -2 -19   31.83    8.94
  -8   2  19   27.83    6.43
   8  -2  19   41.13   10.54
  -8  -2  19   45.56   18.61
  -8   2  19   38.58   10.35
   8  -2  19   38.24    9.66
   8   2  19   42.07    8.78
  -8  -2 -20  176.23   21.26
   8  -2 -20  176.50   11.39
   8  -2  20  128.35   12.50
  -8  -2  20  190.89   16.48
  -8   2  20  198.31   10.24
   8  -2  20  164.06   12.32
   8   2  20  213.34   23.31
  -8  -2 -21  177.07   14.84
   8  -2 -21  210.45    9.23
   8  -2  21  187.62   23.67
  -8  -2  21  204.21   29.02
  -8   2  21  192.51   11.34
   8  -2  21  187.92   17.11
   8   2  21  207.34   14.35
  -8  -2 -22   67.62   14.89
   8  -2 -22   63.17    6.87
  -8  -2  22   67.59   15.22
  -8   2  22   69.19   15.40
   8  -2  22   64.95   14.78
   8   2  22   73.82   13.87
   8  -2  23  219.67   27.20
  -8  -2  23  294.05   17.45
  -8   2  23  247.22   16.34
   8  -2  23  239.91   15.94
   8   2  23  285.40   20.49
  -8  -2 -24   16.24    4.79
   8  -2  24   11.25    6.20
  -8  -2  24    0.40    3.00
  -8   2  24    3.91    4.06
   8  -2  24    1.18    2.86
   8   2  24    0.21    4.18
  -8  -2 -25  133.05   20.54
   8  -2  25  118.12    8.44
  -8  -2  25  145.72    7.60
  -8   2  25  127.03    7.09
   8  -2  25  129.42   25.72
   8   2  25  137.19   10.02
  -8  -2 -26   22.81    6.68
   8  -2  26    4.17    2.96
  -8  -2  26    8.73    4.59
  -8   2  26    5.82    3.74
   8  -2  26   15.24    3.97
   8   2  26   11.07    4.84
  -8  -2 -27   28.84    8.40
   8  -2  27   15.40    5.02
  -8  -2  27   16.78    6.06
  -8   2  27   20.96    5.63
   8  -2  27   22.68    6.25
   8   2  27   22.39    5.43
   8  -2  28   73.89   17.90
  -8  -2  28   76.05   17.28
  -8   2  28   47.23   14.89
   8  -2  28   77.88   23.07
   8   2  28   55.52   15.19
  -8  -2 -29   28.96    8.11
   8  -2  29   28.75    9.86
  -8  -2  29   23.06    7.04
  -8   2  29   17.98    4.25
   8  -2  29   22.22    5.54
   8   2  29   28.20    7.96
  -8  -2 -30   61.10   18.33
   8  -2  30   41.35    9.88
  -8  -2  30   55.39   18.26
  -8   2  30    9.61    3.63
   8  -2  30   44.24   12.12
   8   2  30   47.35   16.51
  -8  -2 -31  395.83   33.25
   8  -2  31  422.34   20.84
  -8  -2  31  407.92   17.95
  -8   2  31  342.42   25.91
   8  -2  31  415.64   21.47
   8   2  31  334.51   36.56
  -8  -2  32    2.73    3.71
  -8   2  32    9.09    6.73
   8   2  32    8.99    6.93
  -8  -2 -33    5.11    6.34
   8  -2  33    6.31    4.41
  -8  -2  33    6.36    4.69
  -8   2  33    2.87    3.69
   8  -2  33    8.77    3.29
   8   2  33   10.02    5.02
  -8  -2 -34    5.91    4.55
   8  -2  34    5.52    3.53
  -8  -2  34    5.05    3.33
  -8   2  34    3.43    4.08
   8  -2  34    5.59    5.20
   8   2  34    3.10    4.66
   8  -2  35   14.31    5.73
  -8  -2  35    7.05    6.12
  -8   2  35    3.63    4.99
   8  -2  35    5.25    4.90
   8   2  35   -7.14    6.18
   8  -2  36    3.98    4.12
  -8  -2  36    7.84    6.47
  -8   2  36    5.03    3.28
   8  -2  36    6.97    4.00
   8   2  36   12.07    7.53
   9  -2   0    0.55    2.53
   9  -2   0   -0.06    1.02
   9  -2   0   -0.04    1.02
  -9  -2  -1   73.76   16.75
   9  -2   1   66.55    5.70
   9  -2  -1   75.97   14.24
   9   2  -1   74.40   16.59
  -9  -2   1   74.47    8.20
   9  -2  -1   71.04    4.44
   9  -2   1   63.63    4.86
   9  -2  -1   65.24    4.61
   9   2   1   92.05   10.40
  -9  -2  -2  144.54   10.27
   9  -2  -2  182.84   11.47
   9  -2   2  162.10   11.27
   9   2  -2  163.74   16.06
  -9  -2   2  170.87   14.99
   9  -2   2  172.19   10.28
   9  -2  -2  160.47    9.25
   9  -2   2  143.24    8.66
   9  -2  -2  164.97    9.62
   9   2   2  174.49   13.04
  -9  -2  -3  282.47   17.02
   9   2  -3  243.02   13.46
   9  -2  -3  310.84   18.78
   9  -2   3  324.83   24.24
   9   2  -3  299.07   17.72
  -9  -2   3  334.84   22.70
   9  -2   3  316.13   17.11
   9  -2  -3  281.65   14.84
   9  -2  -3  315.79   16.86
   9   2   3  335.06   22.95
  -9  -2  -4  143.56   21.04
   9   2  -4  158.47   12.68
   9  -2  -4  207.65   18.36
   9  -2   4  208.69   16.46
   9   2  -4  183.00   14.17
  -9  -2   4  213.21   17.64
   9  -2   4  189.40   14.80
   9  -2  -4  172.30   11.61
   9  -2   4  161.06   11.74
   9   2   4  211.85   18.05
   9  -2  -4  211.46   13.31
  -9  -2  -5  584.89   23.96
   9   2  -5  604.42   24.89
   9  -2  -5  707.06   31.71
   9  -2   5  735.32   31.63
   9   2  -5  687.46   28.04
   9  -2   5  749.28   29.30
  -9  -2   5  792.47   31.71
   9  -2  -5  628.59   24.07
   9  -2   5  590.93   23.22
   9   2   5  800.30   33.67
  -9  -2  -6  184.17   12.84
   9   2  -6  176.24   13.64
   9  -2  -6  249.31   18.08
   9  -2   6  222.17   18.31
   9   2  -6  222.56   14.40
   9  -2   6  226.71   16.08
  -9  -2   6  242.36   17.58
   9  -2  -6  191.48   11.79
   9  -2   6  183.98   12.14
   9   2   6  271.10   26.21
  -9  -2  -7    5.07    3.71
   9   2  -7    3.11    1.50
   9  -2  -7    8.98    4.40
   9  -2   7    7.97    4.15
   9   2  -7   10.48    3.52
   9  -2   7    5.96    2.27
  -9   2   7    8.49    2.32
  -9  -2   7    3.95    3.44
   9  -2  -7    6.95    1.80
   9  -2   7    6.55    3.05
   9   2   7    7.73    4.25
  -9  -2  -8   95.44   14.63
   9   2  -8  110.81    5.33
   9  -2  -8  149.53    6.82
   9  -2   8  140.67   10.82
   9   2  -8  137.40    3.83
   9  -2   8  132.03    4.76
  -9   2   8  157.17    5.63
  -9  -2   8  141.56    7.90
   9  -2  -8   99.61    5.88
   9  -2   8  106.50    9.37
   9   2   8  128.16    7.12
  -9  -2  -9  124.83   11.77
   9   2  -9  138.32    5.28
   9  -2  -9  155.99    8.00
   9   2  -9  162.57   11.15
   9  -2   9  150.10   25.22
  -9  -2   9  183.44   13.56
  -9   2   9  175.33   11.97
   9  -2  -9  117.31    6.08
   9  -2   9  117.17   10.11
   9   2   9  175.33   14.43
  -9   2  -9  152.30   10.52
  -9  -2 -10    5.47    3.81
   9   2 -10    5.55    1.62
   9  -2 -10    4.14    1.97
   9   2 -10    6.06    1.97
   9  -2  10   13.76    4.75
  -9   2  10    3.07    1.97
  -9  -2  10    6.85    1.98
  -9   2  10    3.47    1.63
   9  -2 -10    2.84    1.39
   9  -2  10    6.00    2.43
   9   2  10   10.37    5.24
  -9   2 -10    8.03    1.91
  -9  -2 -11   -2.56    6.03
   9   2 -11    3.61    1.09
   9  -2 -11    7.75    2.84
   9   2 -11    5.15    1.28
   9  -2  11    8.77    4.90
  -9  -2  11   10.22    2.71
  -9   2  11    9.72    2.46
   9  -2  11    0.88    1.89
   9  -2 -11    5.63    1.61
   9   2  11    4.69    3.16
  -9  -2 -12   98.08   17.72
   9   2 -12  118.34    5.88
   9  -2 -12  147.40   12.25
   9   2 -12  121.75    5.91
   9  -2  12  134.47   13.07
  -9  -2  12  145.22   12.21
  -9   2  12  134.70   10.59
   9  -2  12   94.32   15.59
   9  -2 -12   99.24    8.72
   9   2  12  156.82   16.18
  -9  -2 -13  463.84   20.44
   9  -2 -13  598.25   23.90
   9  -2  13  519.93   33.09
  -9   2  13  492.67   19.93
  -9  -2  13  673.57   27.49
  -9   2  13  626.23   28.76
   9  -2  13  428.05   17.96
   9  -2 -13  426.14   17.43
   9   2  13  595.66   27.54
  -9  -2 -14  163.01   28.75
   9  -2 -14  223.52   13.99
   9  -2  14  179.63   14.12
  -9   2  14  189.59   10.33
  -9  -2  14  217.01   27.65
  -9   2  14  213.62   13.06
   9  -2  14  172.82   13.24
   9  -2 -14  134.62   20.18
   9   2  14  200.90   16.21
  -9  -2 -15    0.51    7.77
   9  -2 -15    3.89    3.13
   9  -2  15    3.11    3.44
  -9   2  15    1.17    2.28
  -9  -2  15    6.20    3.47
  -9   2  15    0.75    1.08
   9  -2  15    7.23    2.37
   9   2  15    8.53    4.54
  -9  -2 -16  134.61   12.89
   9  -2 -16  161.43   11.09
   9  -2  16  148.04   12.58
  -9   2  16  104.96   10.64
  -9  -2  16  170.08   11.93
  -9   2  16  172.53   10.65
   9  -2  16  149.36   13.29
   9   2  16  185.39   34.82
  -9  -2 -17  251.93   25.00
   9  -2 -17  269.54   12.50
   9  -2  17  268.87   33.00
  -9  -2  17  332.40   18.33
  -9   2  17  274.49   13.17
   9  -2  17  219.89   16.27
   9   2  17  258.91   13.47
  -9  -2 -18  124.16   25.21
   9  -2 -18  132.56    8.37
   9  -2  18  110.29   24.50
  -9  -2  18  147.06   18.04
  -9   2  18  129.04   10.59
   9  -2  18  109.54   23.97
   9   2  18  125.70   15.03
  -9  -2 -19  162.28   13.13
   9  -2 -19  204.74    6.02
   9  -2  19  176.38   18.65
  -9  -2  19  224.39   10.24
  -9   2  19  223.68   10.49
   9  -2  19  196.54   12.19
   9   2  19  238.76   18.37
  -9  -2 -20   -1.50    6.31
   9  -2  20    3.28    9.53
  -9  -2  20   -1.01    4.75
  -9   2  20    1.33    3.37
   9  -2  20   -2.14    4.59
   9   2  20   11.47    6.09
  -9  -2 -21  142.30   33.20
   9  -2  21  130.26   31.49
  -9  -2  21  190.90   16.70
  -9   2  21  179.85   10.70
   9  -2  21  121.16   22.59
   9   2  21  146.44   13.48
  -9  -2 -22   15.46    8.54
   9  -2  22    9.02    6.36
  -9  -2  22   13.91    4.41
  -9   2  22   14.10    3.47
   9  -2  22   11.22    4.36
   9   2  22   15.29    4.97
  -9  -2 -23    2.78    3.12
   9  -2  23    4.74    4.35
  -9  -2  23    5.85    4.63
  -9   2  23    8.36    3.38
   9  -2  23   11.68    4.41
   9   2  23    3.54    4.57
  -9  -2 -24   68.60   15.93
   9  -2  24   55.89   14.29
  -9  -2  24   72.67   17.22
  -9   2  24   51.50   14.06
   9  -2  24   63.29    6.34
   9   2  24   64.73   20.19
  -9  -2 -25   69.30   15.08
   9  -2  25   57.73   13.93
  -9  -2  25   53.47   17.31
  -9   2  25   53.70   12.53
   9  -2  25   64.13   16.09
   9   2  25   65.18   11.18
  -9  -2 -26   77.52   15.52
   9  -2  26   68.17   19.11
  -9  -2  26   48.32   13.03
  -9   2  26   61.92   14.16
   9  -2  26   57.74   15.18
   9   2  26   61.33   17.74
   9  -2  27  279.02   28.29
  -9  -2  27  356.34   21.50
  -9   2  27  309.34   17.40
   9  -2  27  302.13   21.07
   9   2  27  326.73   32.26
  -9  -2 -28    1.41    1.69
   9  -2  28    2.06    6.30
  -9  -2  28    1.18    4.42
  -9   2  28   -2.40    4.46
   9  -2  28    7.00    7.57
   9   2  28    0.45    4.04
  -9  -2 -29   33.66    7.84
   9  -2  29   31.06    8.79
  -9  -2  29   42.54    8.94
  -9   2  29   20.08   10.11
   9  -2  29   37.48   14.47
   9   2  29    7.48    8.33
  -9  -2 -30    9.54    3.50
   9  -2  30    6.47    3.01
  -9  -2  30   20.63    6.48
  -9   2  30    5.22    3.90
   9  -2  30   10.91    4.77
   9   2  30   18.87    6.69
  -9  -2 -31   12.56    6.15
   9  -2  31   10.20    4.67
  -9  -2  31    9.06    6.20
  -9   2  31    3.53    1.89
   9  -2  31   15.66    9.50
   9   2  31   19.57    6.24
   9  -2  32   31.09   13.03
  -9  -2  32   46.21   13.18
  -9   2  32   21.11    8.96
   9  -2  32   31.19    9.31
   9   2  32   36.07   12.03
   9  -2  33   -0.84    5.64
   9   2  33    0.77    8.06
  -9  -2  33    6.16    4.80
  -9   2  33    1.81    3.50
   9  -2  33    4.89    2.53
   9   2  33    6.39    3.67
   9  -2  34   58.21   20.89
   9   2  34   62.87   20.77
  -9  -2  34   54.57   16.92
  -9   2  34   41.04   15.43
   9  -2  34   79.43   22.91
   9   2  34   56.46   21.95
   9  -2  35  176.10   29.11
   9   2  35  217.94   20.97
  -9  -2  35  194.76   15.96
  -9   2  35  157.90   16.51
   9  -2  35  187.64   27.41
   9   2  35  173.92   22.50
  10  -2   0  537.96   28.80
  10   2   0  462.75   24.58
  10  -2   0  524.26   20.27
  10  -2   0  488.48   18.73
  10   2   0  561.67   23.73
  10  -2  -1  324.04   18.07
  10  -2   1  327.31   22.83
  10   2  -1  319.77   16.60
  10   2   1  329.82   22.67
  10  -2   1  352.18   14.07
  10  -2  -1  335.12   12.85
  10  -2   1  286.30   11.56
  10  -2  -1  305.18   11.72
  10   2   1  366.85   15.89
  10  -2  -2  277.19   20.27
  10  -2   2  248.57   14.54
  10   2  -2  225.74   16.39
  10   2   2  230.64   19.18
 -10  -2   2  266.36   16.41
  10  -2   2  265.22   13.24
  10  -2  -2  249.71   12.23
  10  -2   2  221.01   11.15
  10  -2  -2  259.94   12.96
  10   2   2  279.64   22.27
  10  -2  -3   22.80    7.28
  10  -2   3   20.52   10.24
  10   2  -3   19.84    8.38
  10   2   3   22.75    7.49
 -10  -2   3   29.12    9.22
  10  -2   3   15.63    3.75
  10  -2  -3   14.45    3.29
  10  -2   3   16.14    3.24
  10  -2  -3   16.80    4.62
  10   2   3   21.48    7.17
  10  -2  -4   68.03    5.69
  10  -2   4   55.14   13.39
  10   2  -4   78.01    6.56
 -10  -2   4   80.77   15.25
  10  -2   4   56.01    7.07
  10  -2  -4   54.64    4.17
  10  -2   4   51.94    4.95
  10  -2  -4   61.46    3.62
  10   2   4   72.77    6.99
 -10  -2  -5  193.47   19.98
  10   2  -5  176.80   11.90
  10  -2  -5  218.35   14.65
  10  -2   5  214.29   19.31
  10   2  -5  226.96   12.30
 -10  -2   5  250.91   15.49
  10  -2   5  226.33   12.25
  10  -2  -5  200.79    9.86
  10  -2   5  186.05   11.04
  10   2   5  246.26   13.42
  10  -2  -5  249.61   12.77
 -10  -2  -6   59.04   13.15
  10   2  -6   25.74    6.90
  10  -2  -6   51.64   10.36
  10  -2   6   43.30   12.43
  10   2  -6   40.27    8.16
 -10  -2   6   51.52   15.25
  10  -2   6   32.12    3.98
  10  -2  -6   32.92    4.01
  10  -2   6   32.31    8.07
  10   2   6   50.90   10.66
 -10  -2  -7   17.44    5.35
  10   2  -7    9.49    3.14
  10  -2  -7   14.94    4.47
  10   2  -7   14.57    4.36
  10  -2   7   17.83    5.51
 -10   2   7   15.00    3.06
 -10  -2   7   12.18    4.62
  10  -2   7   11.41    3.16
  10  -2  -7   12.41    2.71
  10  -2   7   11.33    3.30
  10   2   7   15.91    5.32
 -10  -2  -8  135.83   15.44
  10   2  -8  121.42   10.17
  10  -2  -8  144.21   14.55
  10   2  -8  152.10   13.56
  10  -2   8  133.58   12.84
 -10   2   8  164.70   10.79
  10  -2   8  128.13   11.04
 -10  -2   8  166.77   18.57
  10  -2  -8  118.21    6.82
  10  -2   8  119.55    8.69
  10   2   8  160.87   20.22
 -10  -2  -9  457.21   18.51
  10   2  -9  510.79   17.18
  10  -2  -9  585.48   26.07
  10   2  -9  605.54   19.54
  10  -2   9  604.32   37.99
  10  -2   9  615.20   20.07
 -10  -2   9  609.28   24.64
 -10   2   9  617.08   20.32
  10  -2   9  475.23   17.68
  10   2   9  624.09   22.36
 -10  -2 -10   80.49   19.36
  10   2 -10   68.71    6.65
  10  -2 -10   94.22   10.82
  10   2 -10   84.20    6.84
  10  -2  10   90.61   22.54
 -10   2  10   91.37   11.59
 -10  -2  10   92.52   15.02
  10  -2 -10   51.49    5.37
  10  -2  10   63.59    6.25
  10   2  10  106.52   14.83
 -10  -2 -11   15.61    6.65
  10  -2 -11   20.60    4.59
  10   2 -11   14.97    3.49
  10  -2  11   24.81    7.00
 -10  -2  11   11.89    4.53
 -10   2  11   27.23    6.40
  10  -2  11   15.98    4.61
  10   2  11   19.86    7.38
 -10  -2 -12   81.82   20.48
  10  -2 -12  127.36   11.58
  10   2 -12  115.41    6.08
 -10  -2  12  108.24   17.18
 -10   2  12  105.78    8.72
  10  -2  12   82.37    5.79
  10   2  12  130.89   22.03
 -10  -2 -13   69.89   17.80
  10  -2 -13   79.17    8.56
  10  -2  13   72.02   17.78
 -10  -2  13   77.02   13.90
 -10   2  13   79.46   10.13
  10  -2  13   54.55   12.15
  10   2  13   85.67   14.27
 -10  -2 -14   48.79   13.62
  10  -2 -14   50.16    9.85
  10  -2  14   57.59   11.54
 -10  -2  14   50.89   12.64
 -10   2  14   54.00   10.62
  10  -2  14   34.96    9.28
  10   2  14   47.84    8.36
 -10  -2 -15   61.52   16.38
  10  -2 -15   61.08    7.69
  10  -2  15   63.94   13.00
 -10  -2  15   80.84   20.93
 -10   2  15   73.36    8.61
  10  -2  15   57.94    5.72
  10   2  15   77.96   15.29
 -10  -2 -16   64.52   16.16
  10  -2 -16   72.27   11.76
  10  -2  16   67.87   13.29
 -10  -2  16   82.50   16.77
 -10   2  16   82.87    8.00
  10  -2  16   59.93    7.52
  10   2  16   90.47   19.96
 -10  -2 -17  245.48   23.75
  10  -2 -17  338.51   17.48
  10  -2  17  297.72   31.09
 -10  -2  17  317.28   18.59
 -10   2  17  353.87   18.66
  10  -2  17  267.39   21.73
  10   2  17  357.58   22.45
 -10  -2 -18   85.53   17.20
  10  -2  18  126.64   12.53
 -10  -2  18  135.61   12.63
 -10   2  18  138.75   19.11
  10  -2  18  114.31   12.41
  10   2  18  140.71   11.59
 -10  -2 -19    2.02    2.92
  10  -2  19   10.09    4.93
 -10  -2  19    8.85    3.24
 -10   2  19   16.89    5.43
  10  -2  19   11.13    4.92
  10   2  19   12.34    3.48
 -10  -2 -20  107.64   26.11
  10  -2  20   87.74   27.49
 -10  -2  20  115.88   10.85
 -10   2  20  122.77   11.40
  10  -2  20   87.10   19.55
  10   2  20  125.15   13.02
 -10  -2 -21   51.36   14.82
  10  -2  21   54.10   15.67
 -10  -2  21   72.71   21.01
 -10   2  21   43.48   11.59
  10  -2  21   67.34   11.88
  10   2  21   62.07   18.57
 -10  -2 -22  135.72   32.28
  10  -2  22  134.46   15.73
 -10  -2  22  162.26    9.50
 -10   2  22  151.83   14.94
  10  -2  22  162.09   18.20
  10   2  22  176.10   15.94
 -10  -2 -23  170.50   18.45
  10  -2  23  156.77   30.93
 -10  -2  23  216.01   11.03
 -10   2  23  197.44    8.27
  10  -2  23  148.14   26.47
  10   2  23  164.78   15.26
 -10  -2 -24   -2.16    6.85
  10  -2  24    7.96    5.71
 -10  -2  24   12.30    5.64
  10  -2  24    3.90    2.85
  10   2  24    4.26    2.96
 -10  -2 -25   38.49    8.53
  10  -2  25   29.85   10.62
 -10  -2  25   32.62   11.81
 -10   2  25   39.10    8.71
  10  -2  25   35.17    7.15
  10   2  25   26.24    7.08
 -10  -2 -26   33.47    6.81
  10  -2  26   23.78    5.84
 -10  -2  26   20.84    5.20
 -10   2  26   23.85    6.89
  10  -2  26   21.24    6.91
  10   2  26   14.96    4.02
 -10  -2 -27    5.07    2.87
  10  -2  27   -4.06    6.39
 -10  -2  27   -1.89    4.88
 -10   2  27    5.50    4.04
  10  -2  27   -0.35    5.03
  10   2  27   -4.87    5.64
  10  -2  28   62.22   14.01
 -10  -2  28   52.03   13.15
 -10   2  28   54.99   12.65
  10  -2  28   55.24    7.12
  10   2  28   39.16   14.06
  10  -2  29   -8.89    6.66
 -10  -2  29    0.65    3.94
 -10   2  29    7.37    2.87
  10  -2  29    5.45    2.99
  10   2  29    7.44    7.32
  10  -2  30  110.23   33.75
  10   2  30  112.84   26.45
 -10  -2  30   98.85   23.05
 -10   2  30   88.94   17.19
  10  -2  30  120.80   12.02
  10   2  30   94.53   24.71
  10  -2  31  168.25   15.79
  10   2  31  222.71   18.13
 -10  -2  31  163.52   23.98
 -10   2  31  163.96   11.08
  10  -2  31  168.90   19.13
  10   2  31  168.33   19.72
  10  -2  32   34.05   15.34
  10   2  32   33.66    7.52
 -10  -2  32   37.75   14.35
 -10   2  32   29.36    7.31
  10  -2  32   31.10    9.88
  10   2  32   43.45   12.09
  10  -2  33    1.48    4.45
 -10  -2  33    7.53    6.40
 -10   2  33    3.50    3.19
  10  -2  33   -3.54    4.64
  10   2  33    3.96    5.97
  11  -2   0    1.90    3.13
  11   2   0    1.42    2.92
  11  -2   0    1.91    1.06
  11   2   0    1.67    2.24
  11  -2  -1   96.88    8.20
  11  -2   1   99.80    7.17
  11   2   1   83.97   10.91
  11   2  -1   91.67   16.68
  11  -2   1   75.96    5.16
  11   2   1  116.55    6.77
  11   2  -1   91.84   13.04
  11  -2  -2   71.22   13.60
  11  -2   2   59.54   12.74
  11   2  -2   63.97    7.18
  11   2   2   64.79   12.84
  11  -2   2   39.98    5.73
  11  -2  -2   55.03    6.61
  11   2   2   72.50   15.38
  11  -2  -3   51.14   14.17
  11  -2   3   57.10   12.50
  11   2  -3   53.15   13.48
  11   2   3   38.61    5.32
 -11  -2   3   57.12   13.54
  11  -2   3   32.76    6.63
  11  -2  -3   43.16   10.36
  11   2   3   55.87   13.83
  11  -2  -4  441.34   17.76
  11  -2   4  439.47   30.32
  11   2  -4  419.02   15.56
  11   2   4  382.74   19.22
 -11  -2   4  446.89   24.12
  11  -2   4  348.93   11.39
  11  -2  -4  433.89   13.39
  11   2   4  467.40   22.50
  11  -2  -5  237.54   20.75
  11   2  -5  251.51   12.05
  11   2   5  235.56   17.90
 -11  -2   5  265.78   16.48
  11  -2   5  193.03   10.97
  11  -2  -5  241.67   11.06
  11   2   5  279.17   13.60
  11  -2  -6  181.48   20.25
  11  -2   6  154.44   13.60
  11   2  -6  180.52   10.36
  11   2   6  156.70   11.34
 -11  -2   6  188.84   15.45
  11  -2   6  130.60    8.68
  11   2   6  181.29   21.48
  11  -2  -6  183.63    9.12
  11  -2  -7  119.07   16.26
  11  -2   7  153.07   12.22
  11   2  -7  138.47    9.51
  11   2   7  134.36   11.77
 -11  -2   7  149.22   12.13
  11  -2   7   96.01   13.04
  11   2   7  150.78   14.12
  11  -2  -7  149.77    5.35
  11  -2  -8   85.86    9.33
  11   2  -8   78.80   12.43
  11   2   8   81.15   16.79
 -11   2   8   85.91    3.65
 -11  -2   8   88.37   18.70
  11  -2   8   66.26   11.35
  11   2   8   91.76   19.66
  11  -2  -9   79.90   14.04
  11   2  -9   78.28    8.51
  11  -2   9   68.56   19.14
  11   2   9   74.53   13.50
 -11  -2   9   82.81   11.26
  11  -2   9   56.07    7.75
  11   2   9   99.92   12.95
  11  -2 -10   11.99    7.06
  11   2 -10    2.81    2.21
  11  -2  10    6.52    4.13
 -11   2  10    4.69    2.53
 -11  -2  10    8.02    5.44
  11  -2  10    2.33    1.84
  11   2  10    9.82    6.31
  11  -2 -11   27.21    6.13
  11   2 -11   19.61    5.15
  11  -2  11   35.35   10.04
 -11   2  11   32.63    7.41
 -11  -2  11   32.36    9.43
  11  -2  11   20.62    5.11
  11   2  11   32.00    8.93
 -11  -2 -12  179.30    8.84
  11  -2 -12  243.25    9.22
  11  -2  12  201.65   15.16
 -11  -2  12  268.59   14.70
 -11   2  12  280.18    7.56
  11  -2  12  179.09   12.80
  11   2  12  296.36   23.03
 -11  -2 -13  268.53   17.25
  11  -2 -13  401.60   21.81
  11  -2  13  388.75   27.47
 -11  -2  13  410.17   24.12
 -11   2  13  385.46   21.15
  11  -2  13  277.86   18.86
  11   2  13  433.04   34.47
 -11  -2 -14  280.56   17.66
  11  -2 -14  371.14   20.92
  11  -2  14  375.19   28.03
 -11   2  14  406.70   22.52
 -11  -2  14  388.45   25.07
  11  -2  14  307.04   17.87
  11   2  14  393.22   28.22
 -11  -2 -15    3.47    3.56
  11  -2 -15    8.56    3.91
  11  -2  15   14.47    5.43
 -11  -2  15   19.28    4.88
 -11   2  15   16.75    4.40
  11  -2  15   10.48    3.42
  11   2  15   12.54    7.47
 -11  -2 -16  119.33   18.96
  11  -2  16  177.10   20.63
 -11  -2  16  185.04   14.38
 -11   2  16  164.45   13.13
  11  -2  16  127.41   11.60
  11   2  16  202.57   28.09
 -11  -2 -17   20.24    8.67
  11  -2  17   46.51   10.24
 -11  -2  17   39.43   13.12
 -11   2  17   45.95   10.96
  11  -2  17   38.49    9.47
  11   2  17   48.00   14.75
 -11  -2 -18   76.33   19.56
  11  -2  18   94.93   28.78
 -11  -2  18  114.06   18.27
 -11   2  18  103.93   16.46
  11  -2  18   80.19   22.28
  11   2  18  117.87    8.60
 -11  -2 -19  119.56   30.46
  11  -2  19  143.29   29.98
 -11  -2  19  195.23    9.16
 -11   2  19  155.94   19.01
  11  -2  19  135.12   10.16
  11   2  19  150.17   21.63
 -11  -2 -20   14.23    8.03
  11  -2  20    7.88    5.00
 -11  -2  20   12.59    3.69
 -11   2  20   14.36    6.80
  11  -2  20   10.41    4.02
  11   2  20   17.04    8.38
  11  -2  21   41.18   11.45
 -11  -2  21   40.61   10.54
 -11   2  21   34.16    9.58
  11  -2  21   32.42    8.57
  11   2  21   28.78    7.87
  11  -2  22   50.54   13.62
 -11  -2  22   50.83   13.68
 -11   2  22   47.29   13.11
  11  -2  22   44.12   11.10
  11   2  22   52.14   17.13
  11  -2  23    5.48    3.44
  11   2  23    4.85    3.44
 -11  -2  23    5.41    3.08
 -11   2  23    1.44    1.73
  11  -2  24   29.56    9.95
  11   2  24   44.96   10.34
 -11  -2  24   45.34   13.77
 -11   2  24   36.70   12.96
  11  -2  24   38.49   10.88
  11   2  24   28.93   21.19
  11  -2  25    2.36    4.89
  11   2  25    7.33    6.63
 -11  -2  25    2.34    2.61
 -11   2  25    3.71    3.32
  11  -2  25    2.83    2.84
  11   2  25   -0.17    5.43
  11  -2  26   89.10   23.87
  11   2  26  119.04   31.86
 -11  -2  26   94.62   34.33
  11  -2  26   90.68   20.70
  11  -2  27   72.10   17.76
  11   2  27   74.51   20.22
 -11  -2  27   68.51   15.17
  11  -2  27   78.31   10.55
  11  -2  28   26.75    7.99
  11   2  28   14.45    7.94
 -11  -2  28   31.85   12.03
  11  -2  28   29.59    7.47
  11   2  28   26.90    8.84
  11  -2  29   22.75   11.08
  11   2  29   21.97   11.57
 -11  -2  29   24.29    9.72
  11  -2  29   30.12   11.58
  11   2  29   27.65    8.17
  11  -2  30   10.96    7.16
  11   2  30   -1.70    7.22
 -11  -2  30    2.57    1.80
  11  -2  30    8.40    3.91
  11   2  30   -4.28    5.58
  11  -2  31   13.84    5.13
  11   2  31    7.36    4.45
 -11  -2  31    8.21    5.78
  11   2  31    6.57    3.56
  12  -2   0  641.20   40.14
  12   2   0  623.40   32.83
  12   2   0  681.21   41.00
  12  -2  -1  125.09   13.69
  12  -2   1  117.54   20.42
  12   2   1  108.96   11.61
  12   2  -1  102.62   10.17
  12   2   1  124.91    9.41
  12   2  -1  123.05   14.34
  12  -2  -2   46.37   10.61
  12  -2   2   50.85    8.29
  12   2  -2   46.28   13.08
  12   2   2   39.89    8.00
  12   2   2   48.78   12.39
  12   2  -2   48.46   11.31
  12  -2  -3   78.71   17.93
  12  -2   3   72.85   16.64
  12   2  -3   74.20   16.69
  12   2   3   73.33   14.73
  12   2   3   80.87   11.21
  12   2  -3   67.22   12.09
  12  -2  -4   22.04    6.46
  12  -2   4   17.22    5.03
  12   2  -4   17.73    7.08
  12   2   4   14.26    4.13
 -12  -2   4   18.33    4.49
  12   2   4   19.35    5.26
  12  -2  -5  155.65   15.17
  12  -2   5  145.57   10.05
  12   2  -5  152.03    6.57
  12   2   5  121.47   11.98
 -12  -2   5  155.73   19.28
  12   2   5  175.85   10.21
  12  -2  -6   -0.28    3.53
  12  -2   6    3.85    4.31
  12   2  -6    4.93    3.17
  12   2   6   11.12    4.81
 -12  -2   6    3.18    1.91
  12  -2   6    3.54    1.19
  12   2   6    4.26    2.16
  12  -2  -7   26.39    8.29
  12  -2   7   23.96    6.75
  12   2  -7   17.38    4.78
  12   2   7   15.29    6.11
 -12  -2   7   27.50    5.35
  12  -2   7   12.20    3.27
  12   2   7   29.91    9.36
  12  -2  -8  344.14   19.15
  12   2  -8  330.20   19.25
  12  -2   8  331.80   28.08
  12   2   8  294.07   26.35
 -12  -2   8  364.70   24.74
  12  -2   8  235.62   12.88
  12   2   8  349.95   21.05
  12  -2  -9   91.32   13.53
  12  -2   9   89.35   37.08
  12   2   9   92.04   16.37
 -12  -2   9  117.53   16.72
  12  -2   9   57.36    8.73
  12   2   9   89.10   19.92
  12  -2 -10  272.49   15.87
  12  -2  10  265.49   20.91
  12   2  10  236.16   22.54
 -12  -2  10  289.10   14.75
  12  -2  10  201.72   18.02
  12   2  10  296.44   16.66
  12  -2 -11   65.42   17.01
  12  -2  11   73.24   21.17
  12   2  11   61.17   10.12
 -12  -2  11   72.77   16.48
  12  -2  11   41.79   10.65
  12   2  11   67.54   18.97
  12  -2 -12   43.43   10.07
  12  -2  12   51.76   16.11
  12   2  12   55.03   13.29
 -12  -2  12   57.40   14.90
  12  -2  12   29.86    7.87
  12   2  12   53.00   16.42
  12  -2 -13   27.52    7.70
  12  -2  13   36.00    9.85
  12   2  13   17.00    6.70
 -12  -2  13   28.74    9.83
  12  -2  13   22.54    6.69
  12   2  13   38.08    7.84
  12  -2  14   65.03   23.98
  12   2  14   57.62   17.77
 -12  -2  14   74.80   17.19
  12  -2  14   49.00   13.01
  12   2  14   85.57   11.92
  12  -2  15   32.72    8.51
  12   2  15   37.34    9.25
 -12  -2  15   32.30    9.67
  12  -2  15   23.08    6.18
  12   2  15   34.36    8.54
  12  -2  16    0.66    7.08
  12   2  16   23.37    6.80
 -12  -2  16   24.37   12.31
  12  -2  16   10.37    4.40
  12   2  16   17.78    7.48
  12  -2  17   73.53   18.05
  12   2  17   70.98   12.04
 -12  -2  17   77.30   20.27
  12  -2  17   46.29   14.18
  12   2  17   78.33   14.36
  12  -2  18  172.17   14.57
  12   2  18  128.29   28.94
 -12  -2  18  175.16   11.47
  12  -2  18  147.84   18.44
  12   2  18  180.05   15.29
  12  -2  19    9.21    4.61
  12   2  19   15.01    9.19
 -12  -2  19   19.35    6.63
  12  -2  19   19.28    5.21
  12   2  19   10.48    5.97
  12  -2  20  107.20   28.02
  12   2  20   97.14   26.61
 -12  -2  20  127.90   20.43
  12  -2  20   87.62    9.02
  12   2  20  116.09   10.65
  12  -2  21   13.03    8.18
  12   2  21    7.42    5.58
 -12  -2  21   13.39    6.30
  12  -2  21    5.50    2.43
  12   2  21    2.91    3.95
  12  -2  22  102.16   27.81
  12   2  22   94.62   20.63
 -12  -2  22  121.62   14.84
  12  -2  22   97.39   15.47
  12   2  22  116.50   12.13
  12  -2  23   46.55   11.47
  12   2  23   47.22   14.90
 -12  -2  23   54.96   13.56
  12  -2  23   37.82   13.01
  12   2  23   42.34   10.28
  12  -2  24    4.53    5.06
  12   2  24    1.45    3.81
  12  -2  24    3.97    3.84
  12   2  24    7.26    4.57
  12  -2  25   31.78   11.96
  12   2  25   32.05    9.52
  12  -2  25   18.38    8.35
  12   2  25   19.52   10.35
  12  -2  26   11.02    6.51
  12   2  26   13.95   10.39
 -12  -2  26   13.99    6.88
  12  -2  26    8.76    3.90
  12   2  26   22.45    7.57
  12  -2  27   13.82    9.61
  12   2  27   13.55    4.74
 -12  -2  27    3.29    4.76
  12  -2  27    1.60    2.13
  12   2  27   11.19    6.47
  12  -2  28   36.01    9.21
  12   2  28   34.55   13.45
 -12  -2  28   30.11   14.14
  12  -2  28   30.34    9.26
  12   2  28   31.93   10.60
  12  -2  29   -2.09    7.24
  12   2  29    9.63    8.08
 -12  -2  29   11.58    3.53
  12  -2  29    4.21    3.46
  12   2  29    5.04    2.41
  13  -2   0    2.88    3.51
  13   2   0    6.36    2.72
  13   2   0    2.42    2.41
  13  -2  -1   55.51    7.78
  13  -2   1   46.99   10.88
  13   2  -1   40.99   11.18
  13   2   1   43.78   12.74
  13   2   1   69.86   11.50
  13   2  -1   53.31   14.18
  13  -2  -2    4.57    2.96
  13  -2   2    5.85    3.68
  13   2  -2    5.03    3.08
  13   2   2    7.13    2.26
  13   2   2    9.53    3.03
  13   2  -2    6.60    2.68
  13  -2  -3   14.90    5.75
  13  -2   3    9.34    3.83
  13   2  -3   11.24    3.58
  13   2   3   13.89    4.43
  13   2   3   20.99    9.14
  13   2  -3   18.59    6.12
  13  -2  -4  485.23   35.90
  13  -2   4  478.90   27.43
  13   2  -4  470.23   24.57
  13   2   4  463.95   35.69
  13   2  -4  522.03   29.38
  13  -2  -5   27.60    8.51
  13   2  -5   27.63    6.58
  13  -2   5   29.18    8.79
  13   2   5   43.27   10.19
  13  -2  -6  173.49   13.92
  13   2  -6  190.17    6.90
  13  -2   6  176.72   30.13
 -13  -2   6  236.21    8.49
  13   2   6  196.09   10.00
  13  -2  -7   98.42   12.63
  13  -2   7   83.60   20.37
  13   2   7   89.95   17.76
 -13  -2   7  100.33   16.89
  13   2   7   94.60   11.89
  13  -2  -8   39.49   10.25
  13  -2   8   38.06   10.11
  13   2   8   41.43   12.00
 -13  -2   8   51.73   15.11
  13   2   8   62.56    5.40
  13  -2  -9   20.56    6.09
  13  -2   9   43.34   12.28
  13   2   9   28.74   10.30
 -13  -2   9   25.84   11.58
  13   2   9   57.76    8.89
  13  -2 -10   24.23    5.33
  13  -2  10   25.02    5.68
  13   2  10   28.97    9.53
  13   2  10   30.92    8.72
  13  -2  11    8.63    5.04
  13   2  11   13.28    4.93
 -13  -2  11   13.35    5.51
  13   2  11   17.36    5.04
  13  -2  12  135.65   12.37
  13   2  12  130.73   11.38
 -13  -2  12  158.31   10.79
  13   2  12  124.30   15.31
  13  -2  13   41.37   12.85
  13   2  13   36.61   13.30
 -13  -2  13   44.06   10.07
  13   2  13   41.92   12.34
  13  -2  14  229.30   38.83
  13   2  14  200.51   11.30
 -13  -2  14  266.91   19.50
  13   2  14  249.98   15.97
  13  -2  15   49.29   14.33
  13   2  15   47.76    9.74
 -13  -2  15   54.41   18.49
  13   2  15   62.15   13.11
  13  -2  16   31.53   18.36
  13   2  16   35.05   12.47
 -13  -2  16   33.08   12.39
  13   2  16   42.62    8.84
  13  -2  17   10.46    7.23
  13   2  17    1.64    4.07
 -13  -2  17    5.73    4.45
  13  -2  18   53.57   15.75
  13   2  18   46.84   16.33
 -13  -2  18   72.32   18.48
  13   2  18   55.04   18.60
  13  -2  19   20.53    9.43
  13   2  19   40.71   11.83
 -13  -2  19   40.32    7.38
  13   2  19   33.72   14.46
  13  -2  20    8.07    8.29
  13   2  20   10.89    5.14
 -13  -2  20    9.35    3.37
  13   2  20    5.57    2.73
  13  -2  21    8.86    8.22
  13   2  21   11.16    4.24
 -13  -2  21   10.03    6.04
  13   2  21   21.06   10.13
  13  -2  22   69.73   24.81
  13   2  22   65.90   23.47
 -13  -2  22  102.56   15.75
  13   2  22   68.84   21.63
  13  -2  23   34.05    8.08
  13   2  23   39.28   11.40
 -13  -2  23   42.04   13.66
  13   2  23   31.72   12.33
  13  -2  24   32.66    6.24
  13   2  24   46.51   19.15
 -13  -2  24   44.49   13.24
  13   2  24   38.30   15.01
  13  -2  25    1.80    5.20
  13   2  25   11.20    8.52
 -13  -2  25   19.27    7.61
  13   2  25   17.02    9.46
  13  -2  26   78.73   21.97
  13   2  26  107.88   33.70
 -13  -2  26   70.10   22.60
  13   2  26   99.89   17.49
  14  -2   0  392.65   32.78
  14   2   0  342.35   21.98
  14   2   0  338.93   18.22
  14  -2   1   15.56    6.91
  14  -2  -1   10.05    7.74
  14   2  -1   15.64    7.14
  14   2   1    6.39    4.83
  14   2   1    7.77    4.38
  14   2  -1    8.53    5.76
  14  -2  -2   39.43   14.05
  14  -2   2   33.97   11.02
  14   2  -2   23.83    8.35
  14   2   2   44.30   12.53
  14   2   2   37.72   14.30
  14   2  -2   41.84   12.38
  14  -2  -3   27.67    6.92
  14  -2   3   43.01   10.13
  14   2  -3   36.43    9.61
  14   2   3   31.11    8.27
  14   2   3   33.99    7.62
  14   2  -3   32.43   11.38
  14  -2  -4    2.58    2.27
  14  -2   4   10.74    4.65
  14   2  -4   -4.37    2.40
  14   2   4    5.56    2.84
  14   2  -4    2.70    2.71
  14  -2  -5   63.39    6.96
  14  -2   5   62.29    7.52
  14   2   5   43.34   14.03
  14   2   5   50.90   15.73
  14   2  -5   51.77   15.17
  14  -2  -6    3.60    2.16
  14  -2   6    5.27    2.82
  14   2   6    3.61    2.45
  14   2   6    1.58    2.00
  14   2  -6    3.15    2.29
  14  -2  -7    7.31    3.74
  14  -2   7   -1.77    4.95
  14   2   7   19.23    9.92
 -14  -2   7   18.39    5.18
  14   2   7    9.20    4.22
  14  -2   8  269.90   22.80
  14   2   8  256.70   32.89
 -14  -2   8  293.89   15.94
  14   2   8  284.54   15.38
  14  -2   9   17.60    6.91
  14   2   9    2.73    4.28
 -14  -2   9   15.52    9.10
  14   2   9   12.02    4.71
  14  -2  10   83.24    9.77
  14   2  10   97.79    9.38
 -14  -2  10   85.59   21.91
  14   2  10   97.45   12.01
  14  -2  11  125.67   30.18
  14   2  11  150.58    9.44
  14   2  11  137.80   19.04
  14  -2  12   17.03    9.76
  14   2  12   27.20    5.21
 -14  -2  12   17.58    4.67
  14   2  12   20.76    6.10
  14  -2  13    2.54    4.92
 -14  -2  13    6.19    3.33
  14   2  13    5.06    1.53
  14  -2  14   72.68   26.00
 -14  -2  14   73.14   10.42
  14   2  14   80.29    9.52
  14  -2  15   19.20   10.42
  14   2  15    8.79    4.63
 -14  -2  15    6.81    3.65
  14   2  15   12.58    4.02
  14  -2  16   28.80   11.08
  14   2  16    3.93    4.85
 -14  -2  16   25.75    8.02
  14   2  16   26.34    7.67
  14  -2  17    8.58    3.98
  14   2  17   10.12    2.54
  14   2  17    8.74    4.21
  14  -2  18   70.60   19.69
  14   2  18   57.00   16.35
  14   2  18   57.32   17.65
  14  -2  19   50.70   16.71
  14   2  19   83.50    9.94
  14   2  19   47.09   16.28
  14  -2  20   21.36    5.44
  14   2  20   18.58    7.90
  14   2  20   17.38    8.06
  14  -2  21   11.61    6.11
  14   2  21   10.16    4.82
  14   2  21   17.83    8.01
  14  -2  22  101.52   28.38
  14   2  22  101.38   14.80
  14   2  22  108.95   14.74
  14  -2  23   16.98    7.50
  14   2  23   25.70   10.77
  14   2  23   11.30    2.43
  15  -2   0    3.29    3.45
  15   2   0    2.54    3.99
  15  -2  -1   44.31   13.30
  15  -2   1   45.49   17.58
  15   2  -1   41.49   11.77
  15   2   1   45.75   13.10
  15  -2  -2    7.96    4.23
  15  -2   2    6.09    3.85
  15   2   2   10.25    6.20
  15  -2  -3   23.39    5.91
  15  -2   3   27.05   10.92
  15   2   3   17.52    7.70
  15  -2  -4  280.02   12.37
  15  -2   4  246.34   18.88
  15   2   4  240.28   18.56
  15  -2  -5   14.03    6.68
  15  -2   5    9.45    4.71
  15   2   5   15.38    8.16
  15  -2   6   34.12    8.61
  15   2   6   33.27    5.83
  15  -2   7  136.87   19.55
  15   2   7  118.33   17.40
  15  -2   8   24.51   11.17
  15   2   8   16.93    6.76
  15  -2   9    7.51    4.90
  15   2   9    9.83    3.91
  15  -2  10   40.73   10.04
  15   2  10   35.60    8.90
  15  -2  11    6.67    6.01
  15   2  11    6.88    4.31
  15  -2  12   92.13   27.26
  15   2  12   97.43   23.99
  15   2  13   -0.41    3.53
  15  -2  14   33.64   12.00
  15   2  14   44.80   10.89
  15  -2  15   58.62   25.12
  15   2  15   48.57   10.64
  15  -2  16   -0.99    6.14
  15  -2  17    7.87    4.12
  15   2  17   22.02    7.45
  15  -2  18   39.32   10.17
  15   2  18   29.57    7.79
  15  -2  19    2.48    3.87
  15   2  19    0.60    3.36
  16  -2   0  144.13   20.06
  16  -2  -1   25.74   11.69
  16  -2   1   30.13   11.68
  16  -2  -2    6.59    3.48
  16  -2   2    3.29    5.85
  16   2   2    9.49    2.82
  16  -2   3   97.14   22.16
  16   2   3   60.56   11.99
  16  -2   4    4.99    4.39
  16   2   4   -1.03    3.66
  16  -2   5    6.08    4.82
  16   2   5   12.27    3.46
  16  -2   6   12.42    5.49
  16   2   6    5.42    4.16
  16  -2   7   26.49    8.62
  16   2   7   25.35    8.73
  16  -2   8  147.72   21.98
  16   2   8  153.46   16.84
  16  -2   9   35.16    8.35
  16   2   9    9.45    3.69
  16  -2  10   10.78    7.20
  16   2  10   14.16    2.25
  16  -2  11   87.76   20.87
  16   2  11   74.45   12.77
  16  -2  12   -6.55    5.56
  16   2  12   -3.40    5.22
  16  -2  13   10.12    5.01
  16   2  13    2.78    3.35
  16  -2  14   60.90   17.47
  16   2  14   45.15   18.27
  17  -2   2   17.61    6.12
   0  -3   0    0.64    1.26
   0   3   0   -0.23    2.91
   0  -3   0    1.36    2.52
   0   3   0    1.44    1.72
   0  -3  -1   69.53    4.95
   0   3   1   53.46    4.05
   0  -3   1   76.96    7.86
   0   3  -1   57.23    8.69
   0  -3  -1   58.80    6.54
   0   3   1   74.99    9.69
   0  -3   1   63.17    5.48
   0   3  -1   64.53    3.60
   0   3   2   -0.29    3.19
   0  -3   2   -0.54    3.52
   0   3  -2    4.52    3.47
   0  -3  -2   -0.58    3.30
   0   3   2   -4.47    2.92
   0  -3   2    1.58    2.32
   0   3  -2   -2.60    2.84
   0  -3  -3 2111.71   28.00
   0   3   3 2160.03   28.72
   0  -3   3 2063.51   28.43
   0   3  -3 2205.49   29.78
   0  -3   3 2302.56   30.55
   0   3  -3 2298.64   30.03
   0  -3  -4   -1.66    3.71
   0   3   4    2.24    4.53
   0  -3   4   14.97    5.52
   0   3  -4   -0.31    3.04
   0   3   4    1.29    1.79
   0  -3   4   -2.34    3.79
   0   3  -4    5.04    1.68
   0   3   4    2.74    2.06
   0  -3  -5  635.62   10.48
   0   3   5  594.14   10.68
   0  -3   5  637.22   10.50
   0   3  -5  643.51   10.36
   0   3  -5  635.89   10.02
   0   3   5  662.92   10.41
   0  -3  -5  649.72   10.68
   0  -3  -6    1.31    1.44
   0   3   6    1.64    1.67
   0  -3   6   -0.77    3.21
   0   3  -6    1.29    1.81
   0  -3   6   -0.54    1.89
   0   3  -6   -0.43    2.67
   0   3   6   -1.16    3.25
   0  -3  -6   -0.16    3.07
   0  -3  -7   68.02    4.43
   0   3   7   56.01    3.65
   0  -3   7   66.86    5.04
   0   3  -7   65.26    8.45
   0  -3   7   70.19    4.38
   0   3  -7   64.65    5.57
   0   3   7   73.74   10.22
   0  -3  -7   72.29    4.52
   0  -3  -8    6.76    3.20
   0   3   8    2.81    1.53
   0  -3   8    2.26    2.29
   0   3  -8    2.63    2.00
   0  -3   8   -7.56    3.85
   0   3  -8    2.09    1.93
   0   3   8    1.22    2.68
   0  -3  -8   -0.20    2.90
   0  -3  -9    5.38    3.17
   0   3   9    0.89    2.09
   0  -3   9    2.35    1.67
   0   3  -9    4.35    3.16
   0  -3   9    5.08    3.07
   0   3  -9    5.21    2.24
   0   3   9    3.72    2.84
   0  -3  -9    2.33    1.53
   0  -3 -10   -3.93    3.70
   0   3  10    5.21    4.18
   0  -3  10   -1.20    3.29
   0   3 -10    1.76    1.74
   0  -3  10    4.67    2.14
   0   3 -10   -0.68    3.29
   0   3  10   -2.39    4.33
   0  -3 -10   -0.34    2.08
   0  -3 -11 2032.99   56.94
   0   3  11 1997.09   54.70
   0  -3  11 2091.61   57.02
   0   3 -11 2079.40   56.74
   0  -3  11 2225.18   60.70
   0   3 -11 2144.53   60.62
   0   3  11 2185.95   59.90
   0  -3 -11 2239.44   60.83
   0  -3 -12    2.61    3.41
   0   3  12    4.19    1.97
   0  -3  12    1.19    2.20
   0   3 -12    4.38    1.36
   0  -3  12    3.36    2.67
   0   3  12    2.95    3.08
   0  -3 -12   -0.29    2.30
   0  -3 -13  111.44    8.68
   0   3  13   93.47    8.53
   0  -3  13   98.76    8.11
   0   3 -13  102.45    6.30
   0  -3  13  105.85   16.38
   0   3  13  117.80    9.97
   0  -3  14    0.29    2.40
   0  -3 -14    2.61    1.87
   0  -3  14    1.46    2.70
   0  -3  14    0.74    2.54
   0   3  14    2.70    2.95
   0  -3  15  186.87   15.25
   0  -3 -15  204.58   14.81
   0  -3  15  224.92   15.52
   0  -3  15  227.12   23.67
   0   3  15  219.47   16.40
   0  -3  16    2.22    2.44
   0  -3 -16    1.33    3.71
   0  -3  16   -2.58    3.39
   0  -3  16    4.35    3.23
   0   3  16   -1.29    4.83
   0  -3  17    5.70    2.22
   0  -3 -17    3.38    1.84
   0  -3  17    6.37    3.78
   0  -3  17    4.13    4.36
   0   3  17    8.21    4.35
   0  -3  18    2.10    2.42
   0  -3 -18    0.11    2.31
   0  -3  18   -1.97    3.61
   0  -3  18    8.81    7.79
   0   3  18   -1.65    4.35
   0  -3 -19 1047.03   36.98
   0  -3  19 1043.18   38.83
   0  -3  19 1029.62   35.90
   0   3  19 1029.21   36.49
   0  -3 -20    4.72    3.04
   0  -3  20   -1.87    3.97
   0  -3  20   -0.81    5.84
   0   3  20   -0.89    4.72
   0  -3 -21  465.64   15.71
   0  -3  21  482.57   18.61
   0   3  21  448.83   15.83
   0  -3 -22    4.57    3.55
   0  -3  22    5.30    4.68
   0   3  22    1.86    4.16
   0  -3 -23    2.92    4.93
   0  -3  23    2.67    3.78
   0  -3  23    9.06    5.02
   0   3  23   -1.52    5.21
   0  -3 -24    3.65    3.98
   0  -3  24    3.29    3.91
   0  -3  24    6.66    4.17
   0   3  24    5.91    4.09
   0  -3 -25   29.02    6.39
   0  -3  25   19.50    5.10
   0  -3  25   26.42   15.72
   0   3  25   17.54    4.31
   0  -3 -26    2.39    2.48
   0  -3  26    3.95    3.88
   0  -3  26    5.65    2.65
   0   3  26    5.13    3.92
   0  -3 -27  247.44   18.49
   0  -3  27  221.55   16.74
   0  -3  27  233.45   22.03
   0   3  27  218.15   40.28
   0  -3 -28    6.78    3.52
   0  -3  28   -1.55    2.60
   0  -3  28   11.04   10.17
   0  -3 -29  467.38   33.07
   0  -3  29  453.14   27.24
   0  -3  29  464.75   34.63
   0   3  29  477.49   26.50
   0  -3 -30    4.28    4.70
   0  -3  30    4.26    6.03
   0   3  30    2.75    5.00
   0  -3 -31    6.55    6.16
   0  -3  31   -0.83    3.63
   0  -3  31   43.42   21.71
   0   3  31   -5.21    5.22
   0  -3 -32    8.39    3.80
   0  -3  32    1.32    4.68
   0  -3  32    3.07    4.01
   0   3  32    6.40    5.60
   0  -3 -33  237.01   15.71
   0  -3  33  240.04   16.70
   0  -3  33  240.86   23.35
   0   3  33  235.62   32.96
   0  -3 -34    5.47    4.24
   0  -3  34    0.30    2.41
   0  -3  34   -2.07    7.00
   0   3  34   11.69    6.60
   0  -3 -35   16.30    5.52
   0  -3  35   12.39    3.15
   0  -3  35   25.16    7.01
   0   3  35    9.57    5.77
   0  -3 -36    1.12    3.59
   0  -3  36    3.29    1.97
   0  -3  36   10.65    7.48
   0   3  36   -3.08    5.18
   0  -3 -37  168.72   27.77
   0  -3  37  191.37   21.28
   0   3  37  185.67   30.21
   0  -3 -38    1.90    3.85
   0  -3  38   -4.29    7.00
   0   3  38    7.56    9.46
   0  -3 -39    8.77    4.65
   0  -3  39    1.20    4.19
   0   3  39   -1.50    6.57
   0  -3 -40    5.04    3.85
   0  -3  40    3.43    7.12
   0   3  40    4.74    3.08
   0  -3  41   75.75   26.84
   0   3  41   73.99   26.29
  -1  -3   0    0.66    1.21
   1   3   0    2.57    1.50
   1  -3   0   -0.52    3.57
  -1   3   0   -0.77    3.41
   1  -3   0   -1.89    2.67
  -1  -3   0   -3.01    3.66
   1   3   0   -0.98    2.75
  -1   3   0   -2.57    1.86
  -1  -3  -1  549.71    9.56
   1   3   1  535.99    8.93
  -1  -3   1  578.29   10.17
   1   3  -1  528.05    9.12
   1  -3  -1  566.56   10.88
   1  -3   1  577.18   10.68
  -1   3  -1  560.32   10.38
  -1  -3  -1  583.25    9.61
   1  -3  -1  596.33    9.53
  -1   3   1  582.02    8.93
   1   3   1  556.27    9.56
  -1  -3   1  590.44   10.10
   1  -3   1  595.42   10.54
  -1   3  -1  600.54    9.11
  -1  -3  -2  300.26   12.73
   1   3   2  294.90   11.72
  -1  -3   2  302.41   16.87
   1  -3  -2  317.83   17.42
   1   3  -2  295.38   14.81
  -1   3   2  313.17   12.83
   1  -3   2  331.45   13.11
  -1   3  -2  300.57   12.12
   1  -3  -2  322.17   13.15
  -1  -3  -2  326.71   13.14
  -1   3   2  324.04   12.29
   1   3   2  324.60   12.74
  -1  -3   2  295.30   11.81
   1  -3   2  306.62   12.07
   1   3  -2  316.48   12.87
  -1   3  -2  339.74   13.10
   1   3   3  246.19    9.97
   1  -3  -3  270.10   11.29
  -1  -3   3  257.54   11.11
  -1   3   3  252.49   10.41
   1   3  -3  261.83   10.65
   1  -3   3  268.12   11.00
  -1   3  -3  270.66   10.90
  -1  -3  -3  277.85   11.56
  -1   3   3  281.47   11.70
   1   3   3  289.01   12.31
  -1  -3   3  304.18   14.15
   1  -3   3  272.34   11.10
   1   3  -3  283.49   13.27
  -1   3  -3  291.71   12.53
  -1   3   3  295.17   11.67
  -1  -3  -4    1.17    1.21
   1   3   4    4.25    2.25
   1  -3  -4   -0.67    3.55
  -1   3   4    1.22    2.51
  -1  -3   4    2.48    1.63
   1   3  -4   -0.35    3.20
   1  -3   4    2.05    2.31
  -1   3  -4    0.41    2.69
  -1   3   4   -0.01    2.04
   1   3   4   -1.45    3.16
  -1  -3   4   -2.40    3.54
   1   3  -4   -0.05    3.20
   1  -3   4   -0.99    3.36
  -1   3  -4    1.43    2.15
  -1   3   4   -0.20    2.69
   1   3   4    3.62    1.75
  -1  -3  -5    6.11    1.91
   1   3   5    5.82    3.03
   1  -3  -5   12.30    3.11
  -1   3   5   11.87    2.61
  -1  -3   5   13.72    4.00
   1   3  -5   14.69    3.48
   1  -3   5   15.47    3.35
  -1   3  -5   10.39    2.24
   1   3   5   12.98    3.21
  -1  -3   5   14.14    3.19
   1   3  -5   12.58    3.36
   1  -3   5   16.80    4.85
  -1   3  -5   14.21    2.86
  -1   3   5   13.85    2.96
   1   3   5   16.78    4.02
   1  -3  -5   15.01    3.45
  -1  -3  -6   66.43   13.61
   1   3   6   46.67    5.99
   1  -3  -6   68.82   14.17
  -1   3   6   68.64    8.39
  -1  -3   6   54.39    6.06
   1   3  -6   53.96    5.36
   1  -3   6   76.31   16.71
  -1   3  -6   66.92    9.54
  -1  -3   6   59.36    4.45
   1  -3   6   84.47   13.34
   1   3  -6   62.46   13.38
  -1   3  -6   60.49    4.82
  -1   3   6   65.50    4.46
   1   3   6   63.50    4.79
   1  -3  -6   63.84    5.97
  -1  -3  -6   61.09    4.64
  -1  -3  -7 1725.09   23.88
   1   3   7 1674.89   23.07
   1  -3  -7 1670.76   23.19
  -1   3   7 1645.13   22.78
  -1  -3   7 1692.61   22.76
   1   3  -7 1718.67   23.40
   1  -3   7 1729.68   23.76
  -1   3  -7 1700.29   23.80
  -1  -3   7 1884.93   25.89
   1   3  -7 1807.60   24.80
  -1   3   7 1832.48   25.57
   1   3   7 1890.64   25.97
  -1  -3  -7 1835.26   25.07
  -1  -3  -8  411.19    9.20
   1   3   8  355.75   13.82
   1  -3  -8  394.75   14.82
  -1   3   8  384.47    9.82
  -1  -3   8  410.60    7.70
   1  -3   8  394.22   10.16
   1   3  -8  387.77    6.53
  -1  -3   8  432.30    9.27
   1  -3   8  417.00    8.52
   1   3  -8  419.83    8.10
  -1   3  -8  414.03    8.78
  -1   3   8  422.33   11.48
   1   3   8  418.97    8.64
   1  -3  -8  429.75    7.81
  -1  -3  -8  412.29   11.90
  -1  -3  -9  218.99   11.16
   1   3   9  197.94   10.81
   1  -3  -9  232.31   10.46
  -1   3   9  203.72   12.42
  -1  -3   9  241.06   11.54
   1  -3   9  255.41   11.79
   1   3  -9  237.00    9.46
  -1   3  -9  249.15   11.40
  -1  -3   9  256.20   13.52
   1  -3   9  241.61   10.82
   1   3  -9  250.63   11.12
  -1   3  -9  253.28   10.56
  -1   3   9  261.06   11.20
   1   3   9  284.43   14.92
   1  -3  -9  260.81   10.82
  -1  -3  -9  226.99   11.03
  -1  -3 -10    3.75    2.52
   1  -3 -10    4.69    2.70
   1   3  10    1.73    2.28
  -1   3  10    7.54    2.17
  -1  -3  10    3.79    1.85
   1  -3  10   -3.33    3.80
   1   3 -10    0.79    1.96
  -1   3 -10    3.76    1.78
  -1  -3  10    8.15    2.21
   1  -3  10    5.65    4.45
   1   3 -10    3.73    2.06
  -1   3 -10    3.78    2.96
  -1   3  10    3.85    3.03
   1   3  10    0.92    2.65
   1  -3 -10    3.17    3.33
  -1  -3 -10    5.64    2.93
  -1  -3 -11   75.60    6.56
   1  -3 -11   81.88    8.43
   1   3  11   71.18    8.15
  -1   3  11   70.93    5.21
  -1  -3  11   74.36    8.56
   1  -3  11   74.06    8.06
   1   3 -11   68.73    7.37
  -1   3 -11   71.26    6.23
  -1  -3  11   72.43    6.80
   1  -3  11   79.11    7.61
   1   3 -11   74.70    7.85
  -1   3 -11   71.42    6.37
  -1   3  11   79.23   11.38
   1   3  11   92.51   14.15
   1  -3 -11   74.60   11.18
  -1  -3 -11   89.02    9.24
  -1  -3 -12   13.95    4.29
   1  -3 -12   16.18    4.03
   1   3  12   11.36    2.22
  -1   3  12    8.45    3.51
  -1  -3  12   15.97    4.90
   1  -3  12   14.15    5.22
   1   3 -12   13.20    2.92
  -1   3 -12   11.10    3.20
  -1  -3  12   30.28    8.15
   1  -3  12   13.36    4.07
  -1   3 -12   10.35    3.59
  -1   3  12   10.63    4.93
   1   3  12   19.14    5.50
   1  -3 -12   15.00    3.05
  -1  -3 -13  113.08    7.85
   1  -3 -13  128.12    8.38
  -1   3  13  105.93    9.58
  -1  -3  13  117.76    8.04
   1  -3  13  120.18    8.41
  -1   3 -13  105.90   10.08
   1   3 -13  115.12    7.13
  -1  -3  13  124.34   14.42
   1  -3  13  116.54    9.18
  -1   3  13  117.49    8.90
   1   3  13  127.60   20.15
   1  -3 -13  107.80    9.75
  -1  -3  14    0.96    1.46
   1  -3  14    5.26    2.78
  -1  -3 -14    7.69    4.82
   1  -3 -14   -2.57    3.46
  -1   3  14    2.48    1.35
  -1  -3  14    3.71    2.76
   1  -3  14   -0.11    4.15
  -1  -3  14    4.44    2.68
   1  -3  14    3.91    3.59
  -1   3  14    0.71    3.55
   1   3  14    4.05    2.92
   1  -3  15 1372.47   38.53
  -1  -3  15 1535.76   43.29
  -1  -3 -15 1437.00   41.01
   1  -3 -15 1491.17   43.37
  -1  -3  15 1485.14   42.34
   1  -3  15 1450.83   41.73
  -1  -3  15 1539.89   43.76
   1  -3  15 1426.63   41.34
  -1   3  15 1355.11   38.85
   1   3  15 1556.75   46.61
  -1  -3  16   29.84    7.01
  -1  -3 -16   27.81    6.52
   1  -3 -16   34.20    7.58
  -1  -3  16   52.14   13.55
   1  -3  16   33.24    7.50
  -1  -3  16   34.27    7.86
   1  -3  16   27.43   11.12
  -1   3  16   36.39   14.40
   1   3  16   31.49    9.18
  -1  -3  17  433.73   18.81
  -1  -3 -17  440.42   27.69
   1  -3 -17  470.47   21.04
  -1  -3  17  492.02   21.51
   1  -3  17  458.04   21.08
  -1  -3  17  452.10   24.30
   1  -3  17  446.36   20.93
  -1   3  17  424.09   19.49
   1   3  17  524.63   23.77
  -1  -3  18   13.07    2.39
  -1  -3 -18   17.72    4.78
   1  -3 -18   16.74    4.01
  -1  -3  18   16.67    5.57
   1  -3  18   15.28    3.57
  -1  -3  18   15.96    6.79
   1  -3  18   12.23    7.02
  -1   3  18    9.84    3.83
   1   3  18   20.70    5.61
  -1  -3  19   10.64    3.14
  -1  -3 -19   15.38    4.94
   1  -3 -19   12.43    2.29
  -1  -3  19   10.33    2.84
   1  -3  19    5.19    4.38
  -1  -3  19   11.00    3.23
   1  -3  19    6.58    4.25
  -1   3  19    6.73    2.14
   1   3  19   12.16    5.31
  -1  -3  20    5.63    2.93
  -1  -3 -20    2.44    3.54
   1  -3 -20   -1.43    3.40
  -1  -3  20   -0.85    3.29
   1  -3  20    3.87    2.16
   1  -3  20    3.11    2.29
  -1   3  20    4.83    3.47
   1   3  20    2.62    2.86
  -1  -3  21   84.12    7.27
  -1  -3 -21  107.46   10.36
   1  -3 -21  103.64    9.24
  -1  -3  21  109.68    8.74
   1  -3  21  107.27    7.91
  -1  -3  21  105.73    9.78
   1  -3  21  109.66   23.25
  -1   3  21  101.62   15.50
   1   3  21   99.61    7.43
  -1  -3  22   -0.45    1.92
  -1  -3 -22    7.06    3.16
   1  -3 -22   11.54    4.38
  -1  -3  22    3.01    2.61
   1  -3  22    8.59    5.48
  -1  -3  22    3.73    2.69
  -1   3  22   -3.66    4.49
   1   3  22    7.49    4.49
  -1  -3 -23  490.52   24.32
   1  -3 -23  454.08   20.89
  -1  -3  23  517.91   21.44
   1  -3  23  435.13   22.76
  -1  -3  23  467.55   29.06
  -1   3  23  486.98   22.38
   1   3  23  515.66   34.63
  -1  -3 -24   54.55   12.49
   1  -3 -24   63.42   11.70
   1  -3  24   18.96    5.46
  -1  -3  24   11.74    7.09
   1  -3  24   51.96   22.93
  -1   3  24   70.99   15.16
   1   3  24   58.04   12.97
  -1  -3 -25  324.44   15.73
   1  -3 -25  328.49   14.06
  -1  -3  25  313.05   12.25
   1  -3  25  325.41   13.58
  -1  -3  25  365.69   15.39
   1  -3  25  345.09   19.24
  -1   3  25  380.92   16.35
   1   3  25  413.76   18.28
  -1  -3 -26   25.72    5.86
   1  -3 -26   13.39    4.61
  -1  -3  26    5.63    3.58
  -1  -3  26   16.35    7.90
   1  -3  26   30.27   13.29
  -1   3  26   10.22    3.95
   1   3  26   22.90    5.95
  -1  -3 -27   23.99    6.12
   1  -3 -27   17.42    7.49
  -1  -3  27   19.80    7.66
   1  -3  27   19.82    7.71
  -1  -3  27   24.89   10.47
   1  -3  27   24.12    9.49
  -1   3  27   19.84    8.29
   1   3  27   36.95   12.49
  -1  -3 -28   10.51    6.21
   1  -3 -28    7.65    6.09
  -1  -3  28    0.32    2.17
   1  -3  28    2.08    2.18
  -1  -3  28    4.00    3.93
   1  -3  28    4.77    4.00
  -1   3  28   -3.31    5.87
   1   3  28    6.73    4.40
  -1  -3 -29  126.25   25.69
   1  -3 -29  121.53   20.48
  -1  -3  29  129.42    8.11
   1  -3  29  128.79   10.37
   1  -3  29  152.25   35.17
  -1  -3  29  127.34   13.53
  -1   3  29  123.96   11.61
   1   3  29  154.06   15.43
   1  -3 -30    3.34    1.86
  -1  -3 -30    7.76    3.66
  -1  -3  30    0.60    1.83
   1  -3  30   -0.33    2.30
  -1  -3  30    5.15    7.11
   1  -3  30    3.42    3.96
  -1   3  30   -1.78    3.96
   1   3  30    5.12    2.33
  -1  -3 -31   85.80   21.20
   1  -3 -31   87.86    8.46
  -1  -3  31   81.66   13.21
   1  -3  31   78.86   15.08
  -1  -3  31   75.34   18.82
   1  -3  31   74.92   18.08
  -1   3  31   88.41   21.25
   1   3  31   80.94   16.69
  -1  -3 -32    8.64    4.75
   1  -3 -32   13.03    8.09
  -1  -3  32   14.78    3.63
   1  -3  32    9.54    4.84
  -1  -3  32   11.41    7.74
   1  -3  32   14.43    7.38
  -1   3  32   15.22    8.39
   1   3  32   17.08    7.65
   1  -3 -33  368.39   37.88
  -1  -3 -33  351.54   25.71
  -1  -3  33  358.55   20.52
   1  -3  33  398.81   27.56
  -1  -3  33  397.57   24.30
   1  -3  33  387.41   37.45
  -1   3  33  438.00   26.27
   1   3  33  419.36   29.48
   1  -3 -34   12.80    4.30
  -1  -3 -34    4.93    4.06
  -1  -3  34    8.65    4.87
   1  -3  34    7.36    5.90
  -1  -3  34    8.17    5.78
   1  -3  34    5.02    7.27
  -1   3  34   11.14    6.68
   1   3  34    6.17    2.64
  -1  -3 -35   18.43    4.87
   1  -3 -35    2.34    2.74
  -1  -3  35   -0.95    2.97
   1  -3  35    3.26    4.10
  -1  -3  35   -1.10    6.90
   1  -3  35    0.51    3.63
  -1   3  35   12.46    5.84
   1   3  35    1.24    4.30
  -1  -3 -36    9.19    5.71
   1  -3 -36   10.23    3.63
   1  -3  36    4.45    3.38
  -1  -3  36    5.87    4.89
   1  -3  36    1.51    5.18
  -1   3  36    7.82    2.98
   1   3  36   -1.85    7.26
  -1  -3 -37  207.53   20.12
   1  -3 -37  182.11   16.82
   1  -3  37  131.22   44.46
  -1  -3  37  167.75   20.89
   1  -3  37  187.54   27.46
  -1   3  37  187.87   20.19
   1   3  37  172.99   27.53
   1  -3 -38    7.17    2.86
  -1  -3 -38    3.31    3.26
   1  -3  38    6.56    5.48
   1  -3  38    7.53    6.17
  -1   3  38    0.22    2.75
   1   3  38   14.82    6.38
  -1  -3 -39   21.71    6.12
  -1  -3  39   37.76   14.84
   1  -3  39   26.84   11.97
  -1   3  39   38.77   11.22
   1   3  39   32.64    9.03
  -1  -3 -40    0.11    3.60
  -1  -3  40    7.07    6.11
   1  -3  40    8.15    4.84
  -1   3  40   -6.18    6.36
   1   3  40   11.71    7.07
  -1  -3 -41   53.59   10.88
  -1  -3  41   61.00   18.55
   1  -3  41   55.90   21.10
   1   3  41   61.15   24.17
  -1   3  41   56.08   22.32
  -2  -3   0    9.54    3.19
   2   3   0   14.11    3.62
   2  -3   0    6.33    3.00
  -2   3   0    3.17    2.62
  -2  -3   0    8.12    3.77
   2  -3   0   10.14    2.38
   2   3   0    8.24    2.67
  -2   3   0    7.96    1.53
  -2  -3  -1  478.29   10.77
  -2  -3   1  466.74    8.26
   2   3   1  455.93    8.20
   2   3  -1  469.52    8.02
   2  -3  -1  489.27    9.27
   2  -3   1  500.31    9.03
  -2   3   1  472.67    9.65
  -2   3  -1  506.12   10.40
   2  -3  -1  530.97    7.87
  -2  -3  -1  518.30    9.42
  -2  -3   1  484.27    8.60
   2  -3   1  523.37    8.82
  -2   3   1  504.05    8.73
   2   3  -1  506.52    8.87
  -2  -3  -2   44.87   11.60
   2   3   2   41.41    7.74
  -2  -3   2   44.46   10.35
   2   3  -2   37.67    3.81
   2  -3  -2   57.45   14.85
  -2   3   2   45.99    9.87
   2  -3   2   40.36    4.47
  -2   3  -2   47.77    9.52
  -2  -3  -2   40.73    7.87
   2   3   2   42.38   11.29
  -2   3   2   52.56    5.07
  -2  -3   2   49.34   11.22
   2   3  -2   48.66    8.88
   2  -3   2   45.40    4.43
  -2   3  -2   42.81    3.14
  -2   3   2   45.06    6.49
  -2  -3  -3 1829.28   26.77
   2   3   3 1813.16   24.64
  -2  -3   3 1827.71   24.22
   2   3  -3 1920.43   25.27
   2  -3  -3 1896.74   25.92
  -2   3   3 1912.12   25.84
  -2   3  -3 1905.66   27.94
   2   3  -3 2092.65   27.99
   2  -3   3 2059.67   27.92
  -2   3  -3 1991.07   25.81
  -2   3   3 2100.15   27.46
  -2  -3  -4   13.85    3.06
   2   3   4    4.63    2.95
  -2  -3   4   13.53    3.09
   2  -3  -4    6.58    1.93
   2   3  -4    6.45    1.87
  -2   3   4    7.03    1.38
   2  -3   4   12.68    3.26
  -2   3  -4    6.33    1.71
   2   3   4    6.01    5.20
  -2  -3   4    5.50    3.12
   2   3  -4   11.20    4.10
   2  -3   4    4.72    1.63
  -2   3  -4    9.67    2.42
  -2   3   4   11.48    2.73
   2   3   4   10.99    3.67
  -2  -3  -5   61.32   10.86
   2   3   5   61.35    4.39
  -2  -3   5   71.68    9.28
   2  -3  -5   72.13    8.44
  -2   3   5   59.74    4.82
   2   3  -5   64.16    3.72
   2  -3   5   66.70    4.91
  -2   3  -5   63.99    7.36
   2   3   5   65.36    4.84
  -2  -3   5   53.64    7.48
   2   3  -5   72.43   14.52
   2  -3   5   78.72    7.77
  -2   3  -5   59.73    7.16
  -2   3   5   73.08    9.00
   2   3   5   63.14    4.18
   2  -3  -5   65.69    3.60
  -2  -3  -6  280.08   14.19
   2   3   6  277.36   11.33
   2  -3  -6  300.42   13.18
  -2  -3   6  307.92   12.44
  -2   3   6  302.76   13.04
   2   3  -6  291.62   11.51
   2  -3   6  297.11   12.47
  -2   3  -6  312.22   12.46
  -2  -3   6  280.66   11.58
   2   3  -6  320.64   14.13
   2  -3   6  322.57   13.29
  -2   3  -6  307.31   12.59
  -2   3   6  314.38   12.48
   2   3   6  309.81   12.61
   2  -3  -6  316.66   12.10
  -2  -3  -7   -1.23    3.31
   2   3   7    4.55    2.41
   2  -3  -7    7.08    2.87
  -2  -3   7    8.86    2.74
  -2   3   7   10.90    3.12
   2   3  -7    6.41    1.54
   2  -3   7    8.58    2.52
  -2   3  -7    9.09    1.93
  -2  -3   7    6.62    2.15
   2   3  -7    6.53    1.53
   2  -3   7   12.26    2.41
  -2   3  -7    2.63    1.88
  -2   3   7    9.30    2.47
   2  -3  -7    7.68    1.78
   2   3   7    9.13    3.17
  -2  -3  -7    8.93    4.26
  -2  -3  -8   54.78   12.52
   2   3   8   41.64    9.97
   2  -3  -8   66.74   16.14
  -2   3   8   44.55    6.58
  -2  -3   8   51.42    6.08
   2   3  -8   47.96    3.10
   2  -3   8   63.92   15.71
  -2   3  -8   48.00   11.13
  -2  -3   8   62.85    6.94
   2   3  -8   49.86    5.46
   2  -3   8   55.86   14.21
  -2   3  -8   52.77    4.09
  -2   3   8   52.98   13.24
   2   3   8   66.42   13.19
   2  -3  -8   49.94    6.96
  -2  -3  -8   63.01    8.09
  -2  -3  -9    1.76    2.02
   2   3   9    4.82    3.07
   2  -3  -9    6.07    2.85
  -2   3   9    6.46    1.82
  -2  -3   9    4.68    2.81
   2   3  -9    9.52    2.75
   2  -3   9    7.83    1.96
  -2   3  -9    7.81    2.52
  -2  -3   9    4.74    3.30
   2   3  -9    3.52    1.86
   2  -3   9    8.71    2.94
  -2   3  -9    7.39    2.36
  -2   3   9   15.98    3.69
   2  -3  -9    8.64    2.43
   2   3   9    5.70    3.55
  -2  -3  -9    4.64    1.55
  -2  -3 -10  169.30   14.57
   2   3  10  149.73   10.45
   2  -3 -10  181.82   15.94
  -2   3  10  175.99   11.75
  -2  -3  10  163.05   10.13
   2  -3  10  169.34   13.77
   2   3 -10  177.13    9.70
  -2   3 -10  181.87   10.21
  -2  -3  10  181.96   13.15
   2  -3  10  179.72   13.26
   2   3 -10  179.44   14.38
  -2   3 -10  171.75   17.96
  -2   3  10  174.61   16.25
   2   3  10  183.61   11.00
   2  -3 -10  186.41   10.63
  -2  -3 -10  176.70   16.92
  -2  -3 -11 2001.98   57.82
   2  -3 -11 2134.67   59.88
  -2   3  11 1964.00   53.84
  -2  -3  11 2076.61   57.89
   2  -3  11 2053.00   57.00
   2   3 -11 2083.41   56.45
  -2  -3  11 2309.33   64.19
   2  -3  11 2081.73   58.02
  -2   3 -11 1914.80   52.93
  -2   3  11 1962.56   53.54
   2   3  11 2376.78   65.23
   2  -3 -11 2079.96   56.45
  -2  -3 -12  379.21   12.76
   2  -3 -12  406.76   14.30
  -2   3  12  376.28   16.30
  -2  -3  12  412.65   19.57
   2  -3  12  429.52   14.79
   2   3 -12  397.57   11.81
  -2   3 -12  398.64   15.04
  -2  -3  12  459.94   16.00
   2  -3  12  410.53   18.66
  -2   3 -12  376.87   12.55
  -2   3  12  404.59   19.93
   2   3  12  492.96   16.02
   2  -3 -12  417.10   12.77
  -2  -3 -13   -4.55    4.25
   2  -3 -13   10.04    5.58
  -2  -3  13   11.32    5.12
   2  -3  13    5.96    3.82
   2   3 -13    2.58    3.18
  -2  -3  13   13.63    6.77
   2  -3  13    3.93    3.00
  -2   3  13    6.92    4.38
   2   3  13    9.96    4.43
   2  -3 -13    2.19    1.05
  -2  -3  14    4.77    2.23
  -2  -3 -14    4.32    2.70
   2  -3 -14    7.02    4.27
  -2   3  14    1.53    5.47
  -2  -3  14    3.04    1.99
   2  -3  14   11.26    4.17
  -2  -3  14    6.14    6.31
   2  -3  14    6.58    3.79
  -2   3  14    2.89    3.76
   2   3  14    7.67    6.08
   2  -3 -14    3.56    1.59
  -2  -3  15  254.49   15.90
  -2  -3 -15  206.74   14.60
   2  -3 -15  258.35   17.06
  -2   3  15  257.83   16.67
  -2  -3  15  253.19   16.26
   2  -3  15  254.38   16.93
  -2  -3  15  256.62   18.10
   2  -3  15  226.69   14.97
  -2   3  15  234.15   15.75
   2   3  15  276.11   18.24
  -2  -3  16   21.50    3.66
  -2  -3 -16   24.43    7.47
   2  -3 -16   32.85    7.81
  -2   3  16   18.59    4.18
  -2  -3  16   25.73    6.51
   2  -3  16   20.64    5.09
  -2  -3  16   22.15    5.75
   2  -3  16   20.43    5.32
  -2   3  16   22.65    5.97
   2   3  16   25.40    8.27
  -2  -3  17    1.09    1.82
  -2  -3 -17    1.45    2.52
   2  -3 -17    0.21    2.50
  -2  -3  17    0.44    1.83
   2  -3  17   -3.11    4.14
  -2  -3  17    2.87    2.18
  -2   3  17    3.05    3.69
   2   3  17   -0.46    4.36
  -2  -3  18    3.07    1.51
  -2  -3 -18    7.94    3.55
   2  -3 -18    4.18    2.19
  -2  -3  18    2.98    2.76
   2  -3  18    5.09    3.25
  -2  -3  18   -0.82    4.54
   2  -3  18   10.47    5.85
  -2   3  18   -0.85    3.83
   2   3  18   -1.29    4.42
  -2  -3  19  862.48   25.19
  -2  -3 -19  792.69   24.27
   2  -3 -19  873.99   29.15
  -2  -3  19  910.80   28.09
   2  -3  19  874.86   30.05
  -2  -3  19  980.81   33.63
   2  -3  19  817.02   26.75
  -2   3  19  832.92   25.57
   2   3  19  986.77   31.24
  -2  -3  20   92.97    6.39
  -2  -3 -20   88.09    7.57
   2  -3 -20  105.85   15.80
  -2  -3  20   99.49    7.89
   2  -3  20  106.08   25.01
  -2  -3  20  112.69   24.64
   2  -3  20  104.88   23.92
  -2   3  20  102.18    9.56
   2   3  20  108.93   10.70
  -2  -3 -21  135.39   20.64
  -2  -3  21   98.85    9.50
   2  -3 -21  127.63    6.94
  -2  -3  21  139.68    9.27
   2  -3  21   99.26    5.65
  -2  -3  21  118.18    9.04
   2  -3  21  125.37   11.64
  -2   3  21  115.09    9.42
   2   3  21  146.08   32.94
  -2  -3 -22   16.07    5.86
  -2  -3  22   12.34    2.34
   2  -3 -22    9.77    3.20
  -2  -3  22    8.59    3.41
   2  -3  22    7.15    5.02
  -2  -3  22   17.62    5.14
   2  -3  22    3.16    3.53
  -2   3  22    9.05    6.42
   2   3  22   21.20    7.12
  -2  -3 -23   33.85    6.25
  -2  -3  23   20.43    5.64
   2  -3 -23   24.65    6.79
  -2  -3  23   31.36    6.96
   2  -3  23   27.22    6.57
  -2  -3  23   28.69    8.62
   2  -3  23   35.15    8.17
  -2   3  23   28.81    7.95
   2   3  23   26.42    8.18
  -2  -3 -24   62.93   14.92
   2  -3 -24   53.70   12.07
  -2  -3  24   41.41    5.34
  -2  -3  24   45.38    8.68
   2  -3  24   48.64   10.61
  -2  -3  24   58.35    9.30
   2  -3  24   70.31   12.08
  -2   3  24   50.55   12.54
   2   3  24   53.22   10.36
  -2  -3 -25  215.00   18.19
   2  -3 -25  214.00   15.27
  -2  -3  25  195.24   10.93
  -2  -3  25  192.96   11.57
   2  -3  25  186.92   17.45
  -2  -3  25  201.40   14.31
   2  -3  25  219.65   18.92
  -2   3  25  247.18   11.48
   2   3  25  209.38   14.27
  -2  -3 -26    3.93    3.53
   2  -3 -26    5.46    2.38
  -2  -3  26   -0.03    2.88
   2  -3  26   -1.17    4.20
  -2  -3  26   -0.46    6.59
   2  -3  26   17.12    8.82
  -2   3  26    6.95    4.77
   2   3  26    5.93    3.35
  -2  -3 -27  250.57   15.60
   2  -3 -27  245.48   22.77
  -2  -3  27  235.73   11.86
   2  -3  27  239.68   12.76
  -2  -3  27  274.66   23.75
   2  -3  27  299.85   31.92
  -2   3  27  278.87   15.90
   2   3  27  254.05   23.68
  -2  -3 -28   64.49   17.47
   2  -3 -28   50.59   14.37
  -2  -3  28   54.44   13.11
   2  -3  28   67.56   12.77
  -2  -3  28   68.79   25.47
   2  -3  28   92.23   17.64
  -2   3  28   71.99   17.27
   2   3  28   69.29   14.68
  -2  -3 -29  425.74   25.93
   2  -3 -29  431.47   25.40
  -2  -3  29  364.44   20.86
   2  -3  29  446.12   24.64
  -2  -3  29  437.38   24.67
  -2   3  29  450.66   25.89
   2   3  29  442.28   37.81
  -2  -3 -30   19.90    6.35
   2  -3 -30   20.77    5.81
   2  -3  30   18.51    5.88
  -2  -3  30   27.02   10.74
   2  -3  30   11.11   11.11
  -2   3  30   36.02   10.41
  -2  -3 -31    3.72    6.48
   2  -3 -31    6.78    2.14
  -2  -3  31    5.15    2.80
   2  -3  31    6.50    3.50
  -2  -3  31    6.32    4.33
   2  -3  31    9.39    3.97
  -2   3  31    8.46    8.01
   2   3  31   -4.60    7.44
  -2  -3 -32    6.99    3.19
   2  -3 -32   16.95    4.78
  -2  -3  32   16.44    4.03
   2  -3  32   20.30    6.40
  -2  -3  32    5.43    5.95
   2  -3  32   15.54   10.11
  -2   3  32   16.35    7.01
   2   3  32   13.52    3.35
  -2  -3 -33  192.94   20.56
   2  -3 -33  192.07   16.35
   2  -3  33  210.92   13.79
  -2  -3  33  219.82   26.65
   2  -3  33  211.11   26.85
  -2   3  33  199.54   23.99
   2   3  33  196.42   17.28
  -2  -3 -34    7.06    4.20
   2  -3 -34    2.52    4.04
   2  -3  34   10.31    3.02
  -2  -3  34   10.35    7.15
   2  -3  34   14.55   10.40
   2   3  34   15.71    8.58
  -2  -3 -35   11.28    4.55
   2  -3 -35    2.08    4.08
   2  -3  35   15.31    5.52
  -2  -3  35   10.83    7.27
   2  -3  35   16.10    7.20
  -2   3  35   13.41    5.39
   2  -3 -36   34.11    8.73
  -2  -3 -36   37.97   11.23
   2  -3  36   34.42    9.21
  -2  -3  36   35.97   12.16
   2  -3  36   38.93   11.00
  -2   3  36   39.47   10.51
   2   3  36   38.73   13.95
  -2  -3 -37  208.50   19.02
   2  -3  37  177.76   14.11
  -2  -3  37  188.83   22.54
   2  -3  37  156.98   24.58
  -2   3  37  200.51   26.23
   2   3  37  182.00   19.07
  -2  -3 -38   37.35    7.97
   2  -3  38   24.45   11.08
  -2  -3  38   28.97   13.33
   2  -3  38   38.17   14.83
  -2   3  38   30.56    9.10
   2   3  38   40.37   15.40
  -2  -3 -39   -2.25    5.24
  -2  -3  39    6.10    4.81
   2  -3  39   -0.15    7.00
  -2   3  39   10.19   10.31
   2   3  39    6.06    5.22
  -2  -3 -40   23.39    8.21
   2  -3  40   11.36    7.74
  -2  -3  40   24.56    6.63
   2  -3  40   21.16    8.21
  -2   3  40   14.19    4.08
   2   3  40   26.21    8.25
  -3  -3   0    0.05    2.23
   3   3   0    1.26    1.70
   3  -3   0   -2.62    3.43
  -3   3   0    1.26    2.10
   3  -3   0    2.20    1.15
  -3  -3   0   -2.40    3.25
   3   3   0   -3.61    2.91
  -3   3   0    0.66    0.46
  -3  -3  -1  580.06   11.12
  -3  -3   1  590.41   10.87
   3   3   1  596.75   10.31
   3   3  -1  600.73    9.64
   3  -3  -1  643.53   16.98
   3  -3   1  620.78   10.53
  -3   3   1  619.01   10.58
  -3   3  -1  634.63   11.34
  -3  -3  -1  692.99   11.72
  -3  -3   1  693.77   17.12
   3   3   1  642.18   16.61
   3  -3   1  662.33    9.58
   3   3  -1  693.63   11.33
  -3   3   1  686.12    9.71
  -3   3  -1  632.62    9.68
  -3   3   1  677.29    9.43
  -3  -3  -2  170.21    8.65
  -3  -3   2  173.69    9.35
   3   3   2  152.58    8.83
   3   3  -2  179.41    7.36
   3  -3  -2  179.03    8.28
  -3   3   2  180.48    9.82
   3  -3   2  192.18    8.82
  -3   3  -2  192.63    8.73
  -3  -3  -2  206.99    9.24
   3   3   2  195.52    8.54
  -3  -3   2  206.95    9.57
  -3   3   2  193.39    7.66
   3   3  -2  192.97    9.55
   3  -3   2  198.26    8.08
  -3   3  -2  186.83    8.45
  -3   3   2  195.55    8.57
  -3  -3  -3    2.68    2.68
   3   3   3    3.61    2.38
  -3  -3   3    3.04    1.52
   3   3  -3    2.93    1.62
   3  -3  -3    3.88    1.71
  -3   3   3    1.12    3.36
   3  -3   3    0.64    1.61
  -3   3  -3   -0.35    3.07
  -3  -3  -3    6.16    3.08
  -3   3   3    0.37    1.14
   3   3   3    1.43    2.19
  -3  -3   3   10.47    2.79
   3   3  -3    2.62    3.38
   3  -3   3    5.08    1.40
  -3   3  -3    3.77    1.79
  -3   3   3    4.81    1.36
  -3  -3  -4  184.33   10.30
  -3  -3   4  202.03   11.91
   3   3   4  206.29    8.83
   3   3  -4  217.87    8.98
   3  -3  -4  236.84   16.37
  -3   3   4  224.15   15.22
   3  -3   4  218.57   11.06
  -3   3  -4  208.51    9.22
   3   3   4  229.87   14.03
  -3  -3   4  253.41   11.19
   3   3  -4  235.54   10.39
   3  -3   4  224.00    9.05
  -3   3  -4  207.00    8.32
  -3   3   4  213.50    8.63
   3   3   4  232.37   11.47
  -3  -3  -5   26.62    7.00
   3   3   5   24.71    7.48
  -3  -3   5   32.90    7.33
   3   3  -5   28.39    2.23
   3  -3  -5   29.53    7.48
  -3   3   5   22.66    4.79
   3  -3   5   34.60    7.79
  -3   3  -5   26.47    6.99
   3   3   5   25.12    5.98
  -3  -3   5   45.44   11.35
   3   3  -5   27.72    7.72
   3  -3   5   25.26    6.30
  -3   3  -5   20.51    6.74
  -3   3   5   32.20    8.08
   3  -3  -5   31.03    6.05
   3   3   5   32.18    7.17
  -3  -3  -6 1029.19   29.15
   3   3   6 1029.53   28.83
  -3  -3   6 1082.55   29.53
   3  -3  -6 1196.27   34.56
   3   3  -6 1157.21   32.06
  -3   3   6 1126.11   31.74
   3  -3   6 1174.64   33.02
  -3   3  -6 1145.04   33.38
   3   3   6 1129.35   31.55
  -3  -3   6 1259.62   35.18
   3   3  -6 1219.81   34.48
   3  -3   6 1180.11   33.03
  -3   3  -6 1016.96   28.00
  -3   3   6 1059.56   29.42
   3  -3  -6 1198.30   32.73
   3   3   6 1259.07   35.67
  -3  -3  -7  662.38   24.99
   3   3   7  620.17   18.31
  -3  -3   7  733.59   21.01
   3  -3  -7  722.38   23.25
  -3   3   7  738.41   22.39
   3   3  -7  776.90   21.86
   3  -3   7  753.81   28.74
  -3   3  -7  678.32   21.28
  -3  -3   7  803.53   24.35
   3   3  -7  782.13   22.48
   3  -3   7  734.40   21.60
  -3   3  -7  617.64   19.25
  -3   3   7  693.87   20.70
   3  -3  -7  788.48   22.88
   3   3   7  823.61   23.56
  -3  -3  -8   41.68    8.86
   3   3   8   34.43    8.50
  -3  -3   8   44.89    6.78
   3  -3  -8   45.32   10.52
  -3   3   8   39.16    7.87
   3   3  -8   48.02    5.82
   3  -3   8   49.45    9.87
  -3   3  -8   38.88    8.84
  -3  -3   8   47.47   10.48
   3   3  -8   34.64    9.37
   3  -3   8   46.05    4.80
  -3   3  -8   35.15    8.28
  -3   3   8   41.35   10.52
   3  -3  -8   42.50    5.68
   3   3   8   54.82   10.90
  -3  -3  -8   44.86    9.46
  -3  -3  -9  106.60   10.33
   3  -3  -9  122.76    8.23
  -3  -3   9  114.42    8.60
  -3   3   9  106.89    7.13
   3   3  -9  120.35    7.71
   3  -3   9  130.98    9.07
  -3   3  -9  116.79    7.50
  -3  -3   9  147.67   15.60
   3   3  -9  114.69    9.99
   3  -3   9  111.29    7.37
  -3   3  -9   94.49    9.15
  -3   3   9  107.31    6.91
   3  -3  -9  123.80    9.03
   3   3   9  166.12   26.65
  -3  -3 -10   77.73   16.40
   3  -3 -10   73.72   12.40
  -3  -3  10   65.31   13.93
  -3   3  10   69.86   18.02
   3  -3  10   88.98   19.87
   3   3 -10   70.67    7.67
  -3  -3  10   82.61   19.08
   3  -3  10   90.75   12.68
  -3   3 -10   57.81    6.22
  -3   3  10   66.83    6.16
   3  -3 -10   73.33    5.12
   3   3  10   82.98    7.27
  -3  -3 -11  283.15   64.04
   3  -3 -11  295.22   21.22
  -3   3  11  329.41   85.61
   3  -3  11  282.47   17.18
   3   3 -11  296.31   15.35
  -3  -3  11  331.24   18.07
   3  -3  11  277.43   15.31
  -3   3 -11  231.53   12.96
  -3   3  11  249.16   13.77
   3  -3 -11  289.49   14.96
   3   3  11  330.46   17.86
  -3  -3 -12   48.51   10.81
   3  -3 -12   55.79    5.90
  -3   3  12  147.02   35.97
   3  -3  12   56.86   14.04
   3   3 -12   53.69    4.79
  -3  -3  12   57.53   15.77
   3  -3  12   47.48   11.17
  -3   3 -12   43.89    8.84
  -3   3  12   53.32    6.55
   3  -3 -12   42.56    8.52
   3   3  12   56.22   15.53
  -3  -3 -13   22.35    5.93
   3  -3 -13   40.20    6.56
  -3   3  13   24.07    5.65
   3  -3  13   39.98   10.34
  -3  -3  13   41.79    8.41
   3  -3  13   33.73    5.73
  -3   3  13   32.17    5.90
   3   3  13   35.70    7.94
   3  -3 -13   24.33    9.08
  -3  -3  14  174.88   11.39
  -3  -3 -14  172.41   16.56
   3  -3 -14  207.35   19.81
  -3   3  14  173.68   15.24
  -3  -3  14  183.48   13.65
   3  -3  14  157.62   15.01
  -3  -3  14  174.20   12.66
   3  -3  14  162.19   14.76
  -3   3  14  161.53   12.16
   3   3  14  214.08   17.68
   3  -3 -14  160.29   10.65
  -3  -3  15 1326.22   43.91
  -3  -3 -15 1153.05   40.52
   3  -3 -15 1376.92   47.28
  -3   3  15 1362.81   46.58
  -3  -3  15 1395.72   47.59
   3  -3  15 1366.12   47.00
  -3  -3  15 1406.14   48.04
   3  -3  15 1163.29   41.94
  -3   3  15 1002.35   35.66
   3   3  15 1502.26   51.95
  -3  -3  16  239.01   10.50
  -3  -3 -16  238.39   15.31
   3  -3 -16  286.39   22.04
  -3   3  16  246.55   14.89
  -3  -3  16  262.56   12.98
   3  -3  16  240.18   18.64
  -3  -3  16  296.20   23.57
   3  -3  16  234.12   12.53
  -3   3  16  257.96   13.92
   3   3  16  303.56   18.86
  -3  -3  17   60.56    6.21
  -3  -3 -17   80.93   17.52
   3  -3 -17   64.17   13.85
  -3  -3  17   63.80    8.87
   3  -3  17   73.14   17.16
  -3  -3  17   74.25    6.91
   3  -3  17   63.97   17.26
  -3   3  17   69.82   15.35
   3   3  17   88.93   20.38
  -3  -3  18   63.41    4.44
  -3  -3 -18   88.71   19.01
   3  -3 -18   83.44   11.65
  -3  -3  18   76.56    4.94
   3  -3  18   88.23   17.07
  -3  -3  18   87.03   21.96
   3  -3  18   60.81    6.46
  -3   3  18   74.71    9.16
   3   3  18   88.40    8.90
  -3  -3 -19   16.65    4.53
  -3  -3  19   13.05    2.48
   3  -3 -19   26.39    5.33
  -3  -3  19   18.59    4.04
   3  -3  19   25.21    6.49
  -3  -3  19   19.89    5.29
   3  -3  19   33.37    5.81
  -3   3  19   17.95    5.81
   3   3  19   26.75    7.36
  -3  -3 -20    7.49    2.97
  -3  -3  20   -0.01    1.24
   3  -3 -20   10.50    8.71
  -3  -3  20    1.33    1.33
   3  -3  20   -1.56    4.19
  -3  -3  20    2.90    5.64
   3  -3  20    4.96    1.90
  -3   3  20    0.22    1.85
   3   3  20    7.94    5.20
  -3  -3 -21  151.85   13.75
  -3  -3  21  142.55    9.07
   3  -3 -21  159.50   16.42
  -3  -3  21  152.77   11.52
   3  -3  21  172.27   13.30
  -3  -3  21  180.34   15.25
   3  -3  21  172.04   18.60
  -3   3  21  169.32   11.87
   3   3  21  182.34   16.46
  -3  -3 -22   99.22    6.99
  -3  -3  22  100.35    2.91
   3  -3 -22  138.27   13.82
  -3  -3  22  121.59    5.46
   3  -3  22  109.66   13.43
  -3  -3  22  108.87   10.94
   3  -3  22  124.85   18.90
  -3   3  22  105.40   16.30
   3   3  22  129.71   11.05
  -3  -3 -23  289.10   18.07
   3  -3 -23  296.34   13.68
  -3  -3  23  237.57   23.76
  -3  -3  23  277.10   11.65
   3  -3  23  231.44   14.75
  -3  -3  23  272.30   22.40
   3  -3  23  297.85   24.21
  -3   3  23  245.56   29.88
   3   3  23  299.05   15.28
  -3  -3 -24  287.39   13.60
   3  -3 -24  289.31   21.36
  -3  -3  24  257.35   11.15
  -3  -3  24  266.26    9.28
   3  -3  24  270.37   12.88
  -3  -3  24  288.88   14.07
   3  -3  24  275.75   12.47
  -3   3  24  309.29   23.88
   3   3  24  311.73   32.06
  -3  -3 -25  152.85   11.88
   3  -3 -25  164.89   11.63
  -3  -3  25  157.96    8.80
  -3  -3  25  152.97   10.23
   3  -3  25  153.36   10.07
  -3  -3  25  171.40   17.08
   3  -3  25  154.94   14.01
  -3   3  25  161.24   10.94
   3   3  25  179.42   28.98
  -3  -3 -26   49.83   12.14
   3  -3 -26   45.61   10.83
  -3  -3  26   46.90    7.22
   3  -3  26   46.45   10.31
  -3  -3  26   44.60   16.66
   3  -3  26   63.00   11.99
  -3   3  26   58.26   12.24
   3   3  26   52.75   15.01
  -3  -3 -27   31.95    8.35
   3  -3 -27   31.42    7.49
  -3  -3  27   22.89    8.49
   3  -3  27   30.92    5.84
  -3  -3  27   24.72    9.25
   3  -3  27   28.23    7.02
  -3   3  27   24.81    9.79
   3   3  27   13.55    5.46
  -3  -3 -28   45.44   13.60
   3  -3 -28   55.58   10.91
  -3  -3  28   48.58    9.77
   3  -3  28   51.21   12.85
  -3  -3  28   67.29   11.10
   3  -3  28   74.94   17.78
  -3   3  28   68.91   13.53
   3   3  28   50.32   11.53
  -3  -3 -29  149.72   16.97
   3  -3 -29  160.35   14.69
  -3  -3  29  143.38   10.42
   3  -3  29  146.20   15.72
  -3  -3  29  162.99   12.63
   3  -3  29  145.28   13.13
  -3   3  29  182.15   19.97
   3   3  29  140.69   32.51
  -3  -3 -30   27.49    5.41
   3  -3 -30   29.61    6.33
  -3  -3  30   24.55    6.66
   3  -3  30   35.68   11.52
  -3  -3  30   41.85    8.65
   3  -3  30   31.20    8.79
  -3   3  30   37.74   10.50
   3   3  30   25.58   11.57
  -3  -3 -31   28.36    8.37
   3  -3 -31   30.23    7.37
   3  -3  31   35.67   11.21
  -3  -3  31   35.72   10.71
   3  -3  31   39.62    8.27
  -3   3  31   35.34   10.13
   3   3  31   31.09   10.19
  -3  -3 -32   79.58   18.44
   3  -3 -32   66.14   17.02
   3  -3  32   72.38   21.68
  -3  -3  32   75.67   22.24
   3  -3  32   83.18   19.36
  -3   3  32   90.31   16.69
   3   3  32   86.37   26.93
  -3  -3 -33  241.70   20.52
   3  -3 -33  219.60   14.46
   3  -3  33  181.70   24.28
  -3  -3  33  218.83   30.07
   3  -3  33  266.37   27.81
  -3   3  33  212.65   32.84
   3   3  33  232.67   30.97
  -3  -3 -34   39.22    9.53
   3  -3 -34   28.57   10.41
   3  -3  34   28.89    8.81
  -3  -3  34   46.68   15.85
   3  -3  34   45.67   14.05
  -3   3  34   44.26   13.54
   3   3  34   24.34   18.45
  -3  -3 -35   10.86    6.31
   3  -3  35   -1.48    4.37
  -3  -3  35    7.61    4.03
   3  -3  35    8.46    4.71
  -3   3  35    6.80    6.79
   3   3  35    9.47    5.08
  -3  -3 -36   12.13    4.94
   3  -3  36   14.29    7.30
  -3  -3  36    7.99    3.79
   3  -3  36   20.87    9.35
  -3   3  36   21.54    5.55
   3   3  36   11.91    6.30
  -3  -3 -37  100.37   24.82
   3  -3  37   69.29   25.09
  -3  -3  37   97.12   25.07
   3  -3  37  127.91   41.03
  -3   3  37   91.38   23.37
   3   3  37   91.24   26.31
  -3  -3 -38   37.01    7.40
   3  -3  38   19.56    7.63
  -3  -3  38   31.93   10.55
   3  -3  38   30.91   10.44
  -3   3  38   35.17    9.44
   3   3  38   23.93    9.30
  -3  -3 -39   15.49    5.03
   3  -3  39   19.46    5.55
  -3  -3  39   23.72   12.33
   3  -3  39    3.00    6.08
  -3   3  39   30.61    7.83
   3   3  39   31.35   10.90
  -3  -3 -40   16.42    6.36
   3  -3  40    8.55    4.65
  -3  -3  40   18.11   10.34
   3  -3  40    9.52    3.78
  -3   3  40   12.64    6.69
   3   3  40   25.82    9.55
  -4  -3   0  113.25   12.01
   4   3   0  141.47    8.00
   4  -3   0  135.70    9.92
  -4   3   0  131.29    9.42
  -4  -3   0  153.66   11.45
   4   3   0  140.36    8.70
  -4  -3  -1   28.48    9.18
  -4  -3   1   37.75   10.05
   4   3   1   36.02    7.37
   4   3  -1   33.84    3.91
   4  -3  -1   48.55   12.05
   4  -3   1   39.15    7.82
  -4   3   1   41.62    6.90
  -4   3  -1   45.91    8.41
  -4  -3  -1   51.99   11.77
  -4  -3   1   51.35   11.18
   4   3   1   42.48    9.65
   4  -3   1   43.04    3.26
   4   3  -1   30.44    7.51
  -4   3  -1   27.36    4.11
  -4  -3  -2  409.93   14.83
  -4  -3   2  424.01   13.36
   4   3   2  478.50   14.61
   4   3  -2  497.84   14.41
   4  -3  -2  539.39   16.61
   4  -3   2  511.64   15.42
  -4   3   2  511.16   19.58
  -4   3  -2  498.47   18.20
  -4  -3  -2  577.27   18.14
  -4  -3   2  543.16   16.53
   4   3   2  523.84   15.87
   4   3  -2  559.36   16.98
   4  -3   2  554.85   16.05
  -4   3  -2  357.77    9.96
  -4  -3  -3  529.92   16.60
  -4  -3   3  522.14   15.03
   4   3   3  576.68   19.60
   4   3  -3  628.99   18.06
   4  -3  -3  648.18   19.48
   4  -3   3  632.47   22.17
  -4   3   3  617.93   18.83
  -4   3  -3  654.71   19.39
  -4  -3  -3  684.93   24.90
   4   3   3  685.83   19.89
  -4   3   3  686.89   18.63
  -4  -3   3  712.16   20.77
   4   3  -3  639.76   18.81
   4  -3   3  650.28   18.46
  -4   3   3  428.97   12.00
  -4   3  -3  416.11   12.47
  -4  -3  -4    6.32    3.51
  -4  -3   4    4.25    1.91
   4   3   4    7.08    3.98
   4   3  -4    5.68    1.24
   4  -3  -4    7.25    2.14
  -4   3   4    4.17    1.55
   4  -3   4   12.92    4.73
  -4   3  -4    7.12    2.85
   4   3   4    3.14    2.63
  -4  -3   4    5.11    2.80
   4   3  -4    2.57    2.50
   4  -3   4    4.89    1.34
  -4   3   4    2.36    1.34
  -4   3  -4    2.46    1.44
   4   3   4    7.32    4.02
  -4  -3  -5  166.86   10.46
  -4  -3   5  155.47    8.45
   4   3   5  159.90    9.17
   4   3  -5  186.32   10.72
   4  -3  -5  202.33   12.00
  -4   3   5  178.39   10.03
   4  -3   5  182.30   10.70
  -4   3  -5  187.80   10.71
   4   3   5  190.10   11.07
  -4  -3   5  203.43   12.18
   4   3  -5  211.13   13.16
   4  -3   5  175.10    9.41
  -4   3   5  123.80    6.74
  -4   3  -5  127.68    8.38
   4  -3  -5  193.15   10.42
   4   3   5  211.08   11.82
  -4  -3  -6  285.02   11.81
  -4  -3   6  300.76    9.89
   4   3   6  301.15   67.85
   4   3  -6  344.35   77.41
   4  -3  -6  349.10   78.64
  -4   3   6  332.87   17.31
   4  -3   6  354.64   12.29
   4   3   6  359.36   80.99
  -4  -3   6  366.89   82.74
   4   3  -6  361.48   81.34
   4  -3   6  325.10   16.82
  -4   3   6  247.24   55.71
  -4   3  -6  248.77   55.98
   4  -3  -6  339.89   17.25
   4   3   6  380.81   85.73
  -4  -3  -7   25.91    6.32
   4   3   7   18.61    5.29
  -4  -3   7   24.23    5.20
   4  -3  -7   31.04    7.40
   4   3  -7   25.63    5.81
  -4   3   7   16.02    3.50
   4  -3   7   27.04    7.12
  -4  -3   7   33.95    9.07
   4   3  -7   26.95    5.70
   4  -3   7   27.55    6.78
  -4   3   7   21.22    4.28
  -4   3  -7   15.73    3.99
   4  -3  -7   25.21    5.09
   4   3   7   30.80    7.31
  -4  -3  -8  149.26   10.62
  -4  -3   8  147.85    8.19
   4  -3  -8  179.00   11.24
   4   3  -8  170.83   10.15
  -4   3   8  168.09   27.16
   4  -3   8  179.79   11.42
  -4  -3   8  181.96   11.61
   4  -3   8  170.74   13.37
  -4   3   8  125.87   10.73
  -4   3  -8  133.20    8.14
   4  -3  -8  163.61   11.00
   4   3   8  183.25   11.58
  -4  -3  -9    8.98    5.10
  -4  -3   9    6.11    1.62
   4  -3  -9    8.71    5.02
  -4   3   9   60.07   18.58
   4   3  -9    1.22    0.71
   4  -3   9   14.43    6.28
  -4  -3   9    3.66    3.35
   4  -3   9    3.63    3.13
  -4   3   9    3.52    2.01
  -4   3  -9    5.15    3.98
   4  -3  -9    4.75    2.75
   4   3   9    6.11    2.96
  -4  -3 -10  540.84   18.09
  -4  -3  10  624.79   17.31
   4   3 -10  745.23   20.60
   4  -3  10  668.69   20.88
  -4  -3  10  815.88   24.86
   4  -3  10  690.17   24.29
  -4   3  10  560.05   16.70
  -4   3 -10  573.27   16.84
   4  -3 -10  715.43   20.96
   4   3  10  754.64   29.35
  -4  -3 -11 1159.00   33.47
  -4  -3  11 1212.12   32.99
   4  -3 -11 1506.18   44.52
  -4   3  11 1284.50   48.64
   4  -3  11 1386.41   40.41
   4   3 -11 1421.10   38.40
  -4  -3  11 1386.85   39.98
   4  -3  11 1240.54   35.07
  -4   3  11 1039.52   30.11
  -4   3 -11 1059.09   31.79
   4  -3 -11 1282.96   35.73
   4   3  11 1617.32   45.50
  -4  -3 -12  198.74   18.36
  -4  -3  12  239.89   14.74
   4  -3 -12  288.12   19.24
  -4   3  12  288.16   21.93
   4  -3  12  285.59   21.69
   4   3 -12  271.99   16.48
  -4  -3  12  326.89   22.73
  -4   3  12  229.44   18.64
  -4   3 -12  203.63   21.27
   4  -3 -12  260.53   18.20
   4   3  12  297.63   19.47
  -4  -3  13    2.14    0.96
  -4  -3 -13    7.14    2.92
   4  -3 -13    4.92    2.93
  -4  -3  13   -0.06    0.50
  -4   3  13   18.89    7.26
   4  -3  13    6.08    3.98
  -4  -3  13    6.07    3.18
   4  -3  13    2.97    2.84
  -4   3  13    1.71    3.19
   4  -3 -13    0.89    2.14
   4   3  13    4.50    3.41
  -4  -3  14   44.90    1.88
  -4  -3 -14   50.37   13.22
   4  -3 -14   57.86    4.89
  -4  -3  14   46.09    3.75
  -4   3  14   45.85    6.16
   4  -3  14   55.06   11.51
  -4  -3  14   57.32    8.31
   4  -3  14   45.72    9.74
  -4   3  14   50.58    7.43
   4   3  14   81.36   15.56
   4  -3 -14   41.42    8.55
  -4  -3  15  183.18    7.93
  -4  -3 -15  202.17   15.39
   4  -3 -15  226.08   13.82
  -4  -3  15  210.82    9.28
  -4   3  15  226.85   13.26
   4  -3  15  186.92   12.45
  -4  -3  15  231.74   12.67
   4  -3  15  216.14   18.73
  -4   3  15  199.03   12.17
   4   3  15  244.16   12.43
  -4  -3 -16   37.98    7.52
  -4  -3  16   28.24    2.69
   4  -3 -16   38.74    7.81
  -4  -3  16   32.32    3.40
  -4   3  16   28.45    6.79
  -4  -3  16   43.28    8.91
   4  -3  16   40.12    8.61
   4   3  16   40.55   10.46
  -4  -3 -17   47.52   12.24
  -4  -3  17   43.30    3.03
   4  -3 -17   75.08   14.39
  -4  -3  17   56.05    4.42
  -4   3  17   53.71    3.13
   4  -3  17   51.18   14.10
  -4  -3  17   68.80   16.65
   4  -3  17   57.31   16.00
  -4   3  17   57.62   15.07
   4   3  17   73.02   16.46
  -4  -3 -18  109.05    9.15
  -4  -3  18   98.91    5.66
   4  -3 -18  126.14    9.31
  -4  -3  18  111.04   14.45
   4  -3  18  110.55   10.47
  -4  -3  18  131.09   17.75
   4  -3  18  110.78   10.35
  -4   3  18   99.55   14.34
   4   3  18  136.63   17.23
   4  -3 -19  311.39   19.79
  -4  -3  19  329.76   39.26
   4  -3  19  274.04   23.70
  -4  -3  19  348.47   20.20
   4  -3  19  324.15   28.25
  -4   3  19  269.20   16.12
   4   3  19  344.57   24.58
  -4  -3 -20  425.44   24.97
   4  -3 -20  550.55   25.20
  -4  -3  20  484.02   18.73
   4  -3  20  492.02   21.14
  -4  -3  20  574.39   27.32
   4  -3  20  480.47   22.53
  -4   3  20  482.53   22.30
   4   3  20  575.32   25.79
  -4  -3 -21   37.17   10.35
   4  -3 -21   31.73    7.59
  -4  -3  21   25.00    4.58
  -4  -3  21   24.42    4.22
   4  -3  21   32.81    8.58
  -4  -3  21   27.12    7.55
  -4   3  21   32.33    7.43
   4   3  21   25.33   16.25
  -4  -3 -22    3.74    2.45
   4  -3 -22    1.63    4.41
  -4  -3  22    1.41    1.31
  -4  -3  22    0.40    0.94
   4  -3  22   -0.10    4.25
  -4  -3  22    7.40    7.12
   4  -3  22   -3.65    4.61
  -4   3  22   -0.31    3.98
   4   3  22    0.86    3.86
  -4  -3 -23   42.57   10.28
   4  -3 -23   34.57    6.48
  -4  -3  23   27.66    4.30
  -4  -3  23   31.11    5.90
   4  -3  23   34.48    6.59
  -4  -3  23   42.47   16.21
   4  -3  23   34.52   15.34
  -4   3  23   34.62   10.76
   4   3  23   49.14   11.49
  -4  -3 -24   46.99   12.74
   4  -3 -24   37.91   10.23
  -4  -3  24   27.36    4.94
  -4  -3  24   30.10    6.77
   4  -3  24   42.37    9.61
  -4  -3  24   47.89   11.75
   4  -3  24   58.03   14.08
  -4   3  24   47.81   11.76
   4   3  24   55.15   12.50
  -4  -3 -25  121.42   23.23
   4  -3 -25  122.20   11.28
  -4  -3  25  135.46    7.07
   4  -3  25   99.90    8.15
  -4  -3  25  136.15   30.41
   4  -3  25  111.90   21.01
  -4   3  25  152.20   18.40
   4   3  25  148.56   11.31
  -4  -3 -26    8.48    4.90
   4  -3 -26    2.07    3.11
  -4  -3  26    6.48    1.87
   4  -3  26    8.89    3.82
   4  -3  26   -1.13    5.55
  -4   3  26   12.33    5.97
   4   3  26   11.70    5.13
  -4  -3 -27   46.81   12.48
   4  -3 -27   45.93   11.28
  -4  -3  27   44.63    7.01
   4  -3  27   40.31   11.68
  -4  -3  27   56.76   10.63
   4  -3  27   76.57   13.19
  -4   3  27   57.45   10.46
   4   3  27   57.16   15.17
  -4  -3 -28  268.83   30.31
   4  -3 -28  221.99   17.80
   4  -3  28  242.38   15.14
  -4  -3  28  234.41   23.87
   4  -3  28  229.23   16.00
  -4   3  28  250.35   15.45
   4   3  28  261.55   27.23
  -4  -3 -29  161.10   13.28
   4  -3 -29  116.97   11.27
   4  -3  29  122.23   18.19
  -4  -3  29  133.28   27.25
   4  -3  29  148.56   31.66
  -4   3  29  120.64   32.29
   4   3  29  129.11   12.33
  -4  -3 -30   50.46   12.80
   4  -3 -30   35.52    8.87
   4  -3  30   51.66   10.76
  -4  -3  30   49.27   13.47
   4  -3  30   49.73    9.59
  -4   3  30   52.52   16.56
   4   3  30   61.38   33.10
  -4  -3 -31    8.87    4.04
   4  -3 -31    5.44    3.17
   4  -3  31    4.99    3.62
  -4  -3  31    8.45    8.13
   4  -3  31    8.17    8.08
  -4   3  31    9.90    5.52
   4   3  31   -0.52    6.82
  -4  -3 -32   40.55    8.28
   4  -3 -32   29.57    9.81
   4  -3  32   33.89   10.29
  -4  -3  32   46.04   10.44
   4  -3  32   30.84   16.84
  -4   3  32   38.01    9.97
   4   3  32   29.97   10.11
  -4  -3 -33   83.81   17.29
   4  -3  33   71.64   15.83
  -4  -3  33   48.34   14.31
   4  -3  33   63.87   16.19
  -4   3  33   60.57   15.93
   4   3  33   54.58   11.58
  -4  -3 -34   66.56   13.08
   4  -3  34   47.54   15.21
  -4  -3  34   44.90   17.63
   4  -3  34   51.07   11.38
  -4   3  34   50.43   16.44
   4   3  34   51.23   16.76
  -4  -3 -35    5.60    3.11
   4  -3  35   -2.79    4.86
  -4  -3  35    9.96    7.06
   4  -3  35   13.26    9.22
  -4   3  35    9.50    5.53
   4   3  35    2.65    6.77
  -4  -3 -36   68.72   11.96
   4  -3  36   52.81   17.28
  -4  -3  36   57.50   16.43
   4  -3  36   62.75   20.14
  -4   3  36   59.53   17.30
   4   3  36   61.22   25.53
  -4  -3 -37  121.42   22.18
   4  -3  37   92.44   24.13
  -4  -3  37   87.16   29.42
   4  -3  37   87.66   32.02
  -4   3  37   82.92   28.15
   4   3  37  108.97   35.73
  -4  -3 -38   65.49   10.85
   4  -3  38   57.23   17.02
  -4  -3  38   53.08   23.23
  -4   3  38   73.25   22.09
   4  -3  38   49.42   34.95
   4   3  38   64.34   19.56
  -4  -3 -39    8.61    5.04
   4  -3  39   -3.03    4.77
  -4  -3  39    7.47    7.09
  -4   3  39    2.61    5.53
   4  -3  39   -1.33    5.83
   4   3  39    4.77    5.36
  -4  -3 -40   21.44    7.57
   4  -3  40   30.68   10.31
  -4  -3  40   23.96    9.65
   4  -3  40   37.77   14.94
  -4   3  40   29.64   15.54
   4   3  40   54.46   16.73
  -5  -3   0    1.49    5.86
   5   3   0    0.10    1.26
   5  -3   0    0.39    2.19
  -5   3   0    0.92    2.22
  -5  -3   0    2.32    3.76
   5   3   0   -0.21    3.54
  -5  -3  -1  373.60   12.54
  -5  -3   1  338.22   11.19
   5   3   1  461.32   13.68
   5   3  -1  461.08   14.09
   5  -3  -1  485.76   15.11
   5  -3   1  528.76   17.34
  -5   3   1  482.83   14.90
  -5   3  -1  489.91   14.93
  -5  -3  -1  517.35   17.21
  -5  -3   1  570.81   26.25
   5   3   1  549.58   17.46
   5   3  -1  545.07   18.14
  -5  -3  -2  716.57   23.97
  -5  -3   2  695.27   21.99
   5   3   2  879.77   26.11
   5   3  -2  894.83   25.41
   5  -3  -2 1041.92   29.48
   5  -3   2 1037.86   29.77
  -5   3   2  998.27   31.63
  -5  -3  -2 1069.28   31.56
   5   3   2 1050.83   30.33
  -5  -3   2 1094.49   34.49
   5   3  -2 1047.90   31.81
  -5   3  -2 1015.48   27.23
  -5  -3  -3    4.71    2.38
   5   3   3    7.64    2.75
   5   3  -3    5.98    2.00
   5  -3  -3   10.93    4.07
   5  -3   3    6.64    2.81
  -5   3   3    3.75    2.27
   5   3   3    9.89    3.93
  -5  -3   3    3.67    3.82
   5   3  -3    5.24    3.73
   5  -3   3    6.94    1.58
  -5  -3  -4   58.83   17.16
  -5  -3   4   41.56   10.06
   5   3   4   53.40    7.58
   5   3  -4   55.11    4.27
   5  -3  -4   70.42    5.93
   5  -3   4   74.16    7.66
  -5   3   4   66.79    7.71
  -5  -3   4   69.01   14.52
   5   3  -4   65.01   14.54
   5  -3   4   68.12    6.13
  -5   3  -4   58.44    5.83
   5   3   4   73.13    7.00
  -5  -3  -5   20.45    4.82
  -5  -3   5    6.72    4.26
   5   3   5   17.64    4.75
   5   3  -5   19.99    3.69
  -5   3   5   15.40    4.42
   5  -3   5   27.80    6.75
  -5  -3   5   33.70   10.47
   5  -3   5   23.68    3.45
  -5   3   5   22.02    3.09
  -5   3  -5   21.65    3.93
   5  -3  -5   21.61    3.18
   5   3   5   33.33    8.29
  -5  -3  -6  860.25   32.85
  -5  -3   6  808.84   25.07
   5   3  -6 1152.94   31.90
   5  -3  -6 1296.73   45.13
  -5   3   6 1131.43   31.74
   5  -3   6 1181.34   38.73
  -5  -3   6 1340.69   38.96
   5  -3   6 1109.79   31.51
  -5   3   6 1127.43   31.01
  -5   3  -6 1021.47   28.26
   5  -3  -6 1202.88   32.66
   5   3   6 1304.34   37.39
  -5  -3  -7  634.61   20.08
  -5  -3   7  587.09   16.76
   5  -3  -7  916.69   32.68
  -5   3   7  862.75   24.77
  -5  -3   7  939.14   27.81
   5  -3   7  765.74   22.85
  -5   3   7  754.53   21.50
  -5   3  -7  667.45   19.23
   5  -3  -7  857.78   23.61
   5   3   7  934.77   27.68
  -5  -3  -8  195.54   14.45
  -5  -3   8  209.40   13.29
   5   3  -8  308.15   20.38
   5  -3  -8  381.87   29.53
  -5   3   8  279.21   19.24
   5  -3   8  288.61   19.01
  -5  -3   8  309.40   20.84
  -5   3   8  253.09   17.05
   5  -3   8  269.77   16.94
  -5   3  -8  230.02   15.27
   5  -3  -8  276.03   17.02
   5   3   8  303.52   19.76
  -5  -3   9   59.38    3.58
  -5  -3  -9   78.00   21.39
   5  -3  -9   99.87   20.73
   5   3  -9   75.44    3.73
  -5   3   9   73.15    5.36
   5  -3   9   78.58    8.17
  -5  -3   9  108.87   22.57
   5  -3   9   77.88    6.71
  -5   3   9   69.76   11.23
  -5   3  -9   56.14    7.80
   5  -3  -9   65.68    5.01
   5   3   9   98.91   16.42
  -5  -3 -10  285.53   20.57
  -5  -3  10  294.31   17.92
   5  -3 -10  386.64   33.44
  -5   3  10  400.16   27.92
   5   3 -10  375.41   22.95
   5  -3  10  356.20   22.95
  -5  -3  10  427.28   27.25
   5  -3  10  353.73   22.60
  -5   3  10  320.93   21.15
  -5   3 -10  285.40   18.09
   5  -3 -10  359.99   22.83
   5   3  10  411.20   30.69
  -5  -3 -11   72.06   16.79
   5  -3 -11   73.09    9.57
  -5   3  11   75.96    9.11
   5  -3  11   76.32    6.71
   5   3 -11   69.63    2.59
  -5  -3  11   85.59   13.09
   5  -3  11   62.89    9.00
  -5   3  11   53.97    4.10
  -5   3 -11   55.66    8.35
   5  -3 -11   57.92    7.78
   5   3  11   88.32   16.24
  -5  -3 -12    6.88    3.36
   5  -3 -12   21.11    4.72
  -5   3  12   11.37    3.16
   5  -3  12   18.34    5.35
  -5  -3  12   20.42    4.98
   5  -3  12   13.82    3.94
  -5   3  12    9.35    3.81
  -5   3 -12    5.26    1.97
   5  -3 -12   11.35    3.00
   5   3  12   21.64    7.51
  -5  -3 -13  326.09   20.50
   5  -3 -13  385.05   18.92
  -5   3  13  387.00   17.59
   5  -3  13  389.56   18.37
  -5  -3  13  425.16   20.28
   5  -3  13  337.05   19.79
  -5   3  13  314.83   16.62
   5  -3 -13  334.02   15.85
   5   3  13  411.98   19.22
  -5  -3 -14  148.83    9.21
   5  -3 -14  233.18   12.58
  -5   3  14  217.30   12.62
   5  -3  14  226.35   15.36
  -5  -3  14  238.67   12.67
  -5   3  14  156.99   10.09
   5  -3  14  187.62    9.26
   5  -3 -14  181.33    8.77
   5   3  14  236.21   12.77
   5  -3 -15  149.34   14.84
  -5   3  15  147.53   10.24
   5  -3  15  124.09   32.16
  -5  -3  15  161.60   11.50
   5  -3  15  130.02   14.90
  -5   3  15  101.90    7.80
   5  -3 -15  103.43    4.33
   5   3  15  160.26   11.58
   5  -3 -16  846.74   24.97
  -5   3  16  745.67   23.11
   5  -3  16  809.67   25.75
  -5  -3  16  836.45   29.58
   5  -3  16  693.32   22.30
  -5   3  16  669.32   27.68
   5   3  16  894.28   29.11
  -5  -3 -17   14.08    3.33
   5  -3 -17   10.85    3.93
  -5   3  17   15.08    3.81
   5  -3  17   10.44    5.29
  -5  -3  17    8.91    3.47
   5  -3  17    4.20    4.32
  -5   3  17    8.46    4.66
   5   3  17   21.81    5.79
  -5  -3 -18   24.56    7.55
   5  -3 -18   37.44    9.19
  -5   3  18   18.09    5.42
   5  -3  18   20.49    8.95
  -5  -3  18   34.37    7.20
   5  -3  18   30.84    7.12
  -5   3  18   27.98    6.41
   5   3  18   36.58    8.83
  -5  -3 -19   69.04   13.50
   5  -3 -19   50.93    5.48
   5  -3  19   61.36   13.27
  -5  -3  19   67.03   17.59
  -5   3  19   55.91    7.42
   5  -3  19   43.99    9.91
   5   3  19   70.16   19.31
  -5  -3 -20    7.36    3.25
   5  -3 -20    7.05    2.96
   5  -3  20    6.31    3.26
  -5  -3  20    4.34    2.63
  -5   3  20    7.70    5.39
   5  -3  20    2.66    1.57
   5   3  20    7.66    3.51
  -5  -3 -21   41.99   12.16
   5  -3 -21   42.18   11.49
   5  -3  21   43.61    8.84
  -5  -3  21   48.61   10.71
   5  -3  21   40.28    8.50
  -5   3  21   47.09   11.56
   5   3  21   44.96   12.61
  -5  -3 -22   76.51   13.83
   5  -3 -22   72.49    7.55
   5  -3  22   73.87   12.32
  -5  -3  22   72.10   14.30
   5  -3  22   61.90    6.28
  -5   3  22   74.60   17.48
   5   3  22   74.12   13.10
  -5  -3 -23   99.26   11.56
   5  -3 -23   94.94   11.17
  -5  -3  23  119.82   31.15
   5  -3  23  108.56   28.12
  -5   3  23   95.13   23.87
   5   3  23  124.48   26.84
   5  -3 -24  609.48   30.89
  -5  -3  24  655.68   32.86
   5  -3  24  588.51   29.17
  -5   3  24  623.47   28.74
   5   3  24  666.60   32.84
   5  -3 -25   45.16   11.86
   5  -3  25   38.61   13.48
  -5  -3  25   64.11   16.38
[truncated: 813,281 more chars]
